# Supplementary material
Source: HighWire-hosted journal article supplement (doi:10.1101/rna.080240.124)
Supplement: Supplemental_Table1.xlsx [file Supplemental_Table1.xlsx]

## Sheet: Arkusz1
sample_name	replicate	species	taxon_id	condition	platform	seq_type	accession	project_accession	source
Mus_musculus_hippocamp_WT_rep1_ONT_DRS	WT_1	Mus musculus	10090	WT	Oxford Nanopore	DRS	ERS16372204	PRJEB75356	https://doi.org/10.1038/s44318-024-00258-3
Mus_musculus_hippocamp_WT_rep2_ONT_DRS	WT_2	Mus musculus	10090	WT	Oxford Nanopore	DRS	ERS20294384	PRJEB76814	this work
Mus_musculus_hippocamp_WT_rep3_ONT_DRS	WT_3	Mus musculus	10090	WT	Oxford Nanopore	DRS	ERS20294385	PRJEB76814	this work
Mus_musculus_hippocamp_Gld2_KO_rep1_ONT_DRS	KO_1	Mus musculus	10090	Tent2 KO	Oxford Nanopore	DRS	ERS16372206	PRJEB75356	https://doi.org/10.1038/s44318-024-00258-3
Mus_musculus_hippocamp_Gld2_KO_rep2_ONT_DRS	KO_2	Mus musculus	10090	Tent2 KO	Oxford Nanopore	DRS	ERS20294386	PRJEB76814	this work
Mus_musculus_hippocamp_Gld2_KO_rep3_ONT_DRS	KO_3	Mus musculus	10090	Tent2 KO	Oxford Nanopore	DRS	ERS20294387	PRJEB76814	this work
Mus_musculus_hippocamp_WT_rep1_Illumina	WT_1	Mus musculus	10090	WT	Illumina	RNA-seq	ERS20294500	PRJEB76814	this work
Mus_musculus_hippocamp_WT_rep2_Illumina	WT_2	Mus musculus	10090	WT	Illumina	RNA-seq	ERS20294501	PRJEB76814	this work
Mus_musculus_hippocamp_WT_rep3_Illumina	WT_3	Mus musculus	10090	WT	Illumina	RNA-seq	ERS20294502	PRJEB76814	this work
Mus_musculus_hippocamp_Gld2_KO_rep1_Illumina	KO_1	Mus musculus	10090	Tent2 KO	Illumina	RNA-seq	ERS20294503	PRJEB76814	this work
Mus_musculus_hippocamp_Gld2_KO_rep2_Illumina	KO_2	Mus musculus	10090	Tent2 KO	Illumina	RNA-seq	ERS20294504	PRJEB76814	this work
Mus_musculus_hippocamp_Gld2_KO_rep3_Illumina	KO_3	Mus musculus	10090	Tent2 KO	Illumina	RNA-seq	ERS20294505	PRJEB76814	this work
WT1	WT_1	Mus musculus	10090	WT	Illumina	miRNA-seq	ERR13331628	PRJEB76999	this work
KO1	KO_1	Mus musculus	10090	Tent2 KO	Illumina	miRNA-seq	ERR13331629	PRJEB76999	this work
WT2	WT_2	Mus musculus	10090	WT	Illumina	miRNA-seq	ERR13331630	PRJEB76999	this work
KO3	KO_2	Mus musculus	10090	Tent2 KO	Illumina	miRNA-seq	ERR13331631	PRJEB76999	this work
WT3	WT_3	Mus musculus	10090	WT	Illumina	miRNA-seq	ERR13331632	PRJEB76999	this work
KO3	KO_3	Mus musculus	10090	Tent2 KO	Illumina	miRNA-seq	ERR13331633	PRJEB76999	this work
KO4	KO_4	Mus musculus	10090	Tent2 KO	Illumina	miRNA-seq	ERR13331634	PRJEB76999	this work
KO5	KO_5	Mus musculus	10090	Tent2 KO	Illumina	miRNA-seq	ERR13331635	PRJEB76999	this work
