# Supplementary material
Source: HighWire-hosted journal article supplement (doi:10.1101/rna.080240.124)
Supplement: Supplemental_Table2.xlsx [file Supplemental_Table2.xlsx]

## Sheet: Info
Supplementary Data 2
This file contains the summary of results of miRNA analysis under Tent2 KO in mouse hippocampus.
It contain three tables:
Table 1. Differential isomiR expression - table with DESeq2 results.
Table 2. Normalized isomiR counts - table with counts for eac isomiR in each sample. The normalization was performed in DESeq2 R package, appling the batch correction.
Table 3. Results of analysis in Quagmir
For the explanation of column names in Table 1 and Table 3 please refer to manuals of tools that were used to create those tables.

## Sheet: Differential isomiR expression
miRNA tailing under Tent2 KO in mice hippocampus
Table 1. Differential isomiR expression
isomiR_ID	baseMean	log2FoldChange	lfcSE	stat	pvalue	padj	significant	MIRNA	category	tailClass
mmu-miR-30a-5p-2-0--	139562	0.18	0.25	0.71	0.4794	0.7476	non-significant	mmu-miR-30a-5p	trimmed	other
mmu-miR-30a-5p-0-2-CT	36892	-0.08	0.15	-0.55	0.5843	0.818	non-significant	mmu-miR-30a-5p	ambiguous tail	other
mmu-miR-30a-5p-0-1-A	5533.16	0.25	0.24	1.05	0.2955	0.5842	non-significant	mmu-miR-30a-5p	NT tail	A
mmu-miR-30a-5p-1-0--	3914.69	0.07	0.25	0.29	0.773	0.9082	non-significant	mmu-miR-30a-5p	trimmed	other
mmu-miR-30a-5p-0-3-CTT	2959.08	0.03	0.2	0.16	0.8761	0.9561	non-significant	mmu-miR-30a-5p	NT tail	other
mmu-miR-30a-5p-0-1-C	2646.92	0.07	0.22	0.32	0.7477	0.9024	non-significant	mmu-miR-30a-5p	ambiguous tail	C
mmu-miR-30a-5p-0-0--	1086.82	-0.28	0.26	-1.08	0.2815	0.5668	non-significant	mmu-miR-30a-5p	canonical	other
mmu-miR-30a-5p-0-1-T	656.33	0.18	0.22	0.84	0.4009	0.6847	non-significant	mmu-miR-30a-5p	NT tail	U
mmu-miR-30a-5p-1-1-A	346.73	-0.4	0.29	-1.39	0.1641	0.4238	non-significant	mmu-miR-30a-5p	ambiguous tail	A
mmu-miR-30a-5p-3-1-G	817.68	1.58	0.41	3.8	0.0001	0.0053	significant	mmu-miR-30a-5p	ambiguous tail	G
mmu-miR-30a-5p-0-2-CG	503.74	1.55	0.35	4.43	0	0.001	significant	mmu-miR-30a-5p	NT tail	other
mmu-miR-30a-5p-3-0--	172.26	1.41	0.38	3.67	0.0002	0.0073	significant	mmu-miR-30a-5p	trimmed	other
mmu-miR-30a-5p-0-3-CCT	87.07	-0.69	0.36	-1.91	0.0568	0.2451	non-significant	mmu-miR-30a-5p	NT tail	other
mmu-miR-30a-5p-0-2-CA	34.97	-0.15	0.55	-0.27	0.79	0.9126	non-significant	mmu-miR-30a-5p	NT tail	other
mmu-miR-30a-5p-0-2-CC	39.53	1.04	0.43	2.42	0.0157	0.1136	non-significant	mmu-miR-30a-5p	NT tail	other
mmu-miR-30a-5p-1-1-T	27.98	0.21	0.49	0.44	0.6598	0.8646	non-significant	mmu-miR-30a-5p	ambiguous tail	U
mmu-miR-30a-5p-2-1-T	32.34	0.57	0.6	0.94	0.3471	0.6282	non-significant	mmu-miR-30a-5p	ambiguous tail	U
mmu-miR-30a-5p-2-2-GA	32.53	-0.38	0.52	-0.73	0.4657	0.7429	non-significant	mmu-miR-30a-5p	ambiguous tail	other
mmu-miR-30a-5p-3-1-T	30.01	-0.14	1.09	-0.13	0.8952	0.9675	non-significant	mmu-miR-30a-5p	ambiguous tail	U
mmu-miR-30a-5p-6-4-AGGA	18.24	-0.15	0.6	-0.26	0.7977	0.9194	non-significant	mmu-miR-30a-5p	ambiguous tail	other
mmu-miR-30a-5p-6-4-CGGA	20.37	0.22	0.57	0.39	0.6963	0.8834	non-significant	mmu-miR-30a-5p	ambiguous tail	other
mmu-miR-30a-5p-4-2-TA	16.55	-0.49	1.45	-0.34	0.7342		non-significant	mmu-miR-30a-5p	ambiguous tail	UA
mmu-miR-30a-5p-8-6-GCTGGA	13.35	-0.92	1.07	-0.87	0.3865		non-significant	mmu-miR-30a-5p	ambiguous tail	other
mmu-miR-30a-5p-9-7-TACTGGA	18.6	-0.17	1.43	-0.12	0.907	0.9694	non-significant	mmu-miR-30a-5p	ambiguous tail	other
mmu-miR-30a-5p-4-1-A	18.17	-3.62	2.3	-1.58	0.115	0.3552	non-significant	mmu-miR-30a-5p	ambiguous tail	A
mmu-miR-30a-5p-9-7-AACTGGA	7.62	-1.18	1.92	-0.61	0.5398		non-significant	mmu-miR-30a-5p	ambiguous tail	other
mmu-miR-30a-5p-7-5-ATGGA	16.29	-0.54	1.49	-0.36	0.7178		non-significant	mmu-miR-30a-5p	ambiguous tail	other
mmu-miR-30c-2-3p-0-0--	114.52	0.43	0.38	1.12	0.2607	0.5475	non-significant	mmu-miR-30c-2-3p	canonical	other
mmu-miR-30c-2-3p-2-0--	23.11	0.52	0.51	1.03	0.3016	0.5906	non-significant	mmu-miR-30c-2-3p	trimmed	other
mmu-miR-30c-2-3p-1-0--	9.76	0.77	0.86	0.9	0.3694		non-significant	mmu-miR-30c-2-3p	trimmed	other
mmu-miR-30c-2-3p-3-0--	1.8	1.45	1.91	0.76	0.4498		non-significant	mmu-miR-30c-2-3p	trimmed	other
mmu-miR-6896-5p-0-0--	8.24	0.7	0.97	0.72	0.469		non-significant	mmu-miR-6896-5p	canonical	other
mmu-miR-6899-3p-0-1-T	14.2	0.19	0.66	0.28	0.7761		non-significant	mmu-miR-6899-3p	NT tail	U
mmu-miR-6899-3p-1-2-TT	3.56	0.39	1.25	0.31	0.7571		non-significant	mmu-miR-6899-3p	ambiguous tail	UU
mmu-miR-26b-5p-0-1-T	10680.2	1.32	0.56	2.37	0.0177	0.1218	non-significant	mmu-miR-26b-5p	ambiguous tail	U
mmu-miR-26b-5p-0-0--	1393.77	1.34	0.5	2.68	0.0074	0.0678	non-significant	mmu-miR-26b-5p	canonical	other
mmu-miR-26b-5p-0-2-TT	371.34	0.92	0.45	2.07	0.0388	0.195	non-significant	mmu-miR-26b-5p	NT tail	UU
mmu-miR-26b-5p-1-0--	305.3	1.35	0.41	3.29	0.001	0.0197	significant	mmu-miR-26b-5p	trimmed	other
mmu-miR-26b-5p-1-2-CT	188.73	1.08	0.32	3.41	0.0007	0.0154	significant	mmu-miR-26b-5p	ambiguous tail	other
mmu-miR-26b-5p-0-2-TA	211.47	0.86	0.42	2.06	0.0394	0.1969	non-significant	mmu-miR-26b-5p	NT tail	UA
mmu-miR-26b-5p-0-1-A	109.89	1.5	0.63	2.4	0.0164	0.116	non-significant	mmu-miR-26b-5p	NT tail	A
mmu-miR-26b-5p-0-2-TC	18.85	0.71	0.57	1.25	0.2112	0.4832	non-significant	mmu-miR-26b-5p	NT tail	other
mmu-miR-26b-5p-1-1-C	19.97	1.2	0.63	1.91	0.0561	0.2429	non-significant	mmu-miR-26b-5p	ambiguous tail	C
mmu-miR-26b-3p-1-0--	24.68	0.4	0.64	0.63	0.5318	0.7881	non-significant	mmu-miR-26b-3p	trimmed	other
mmu-miR-26b-3p-0-0--	16.81	-0.06	0.83	-0.07	0.9435		non-significant	mmu-miR-26b-3p	canonical	other
mmu-miR-375-3p-0-0--	315.19	-0.55	0.56	-0.97	0.3306	0.6145	non-significant	mmu-miR-375-3p	canonical	other
mmu-miR-375-3p-1-1-G	126.01	0.39	0.51	0.76	0.4475	0.7284	non-significant	mmu-miR-375-3p	ambiguous tail	G
mmu-miR-375-3p-0-1-T	23.65	-0.51	0.76	-0.67	0.5058	0.7658	non-significant	mmu-miR-375-3p	NT tail	U
mmu-miR-375-3p-3-0--	23.54	0.11	0.9	0.12	0.9021	0.9675	non-significant	mmu-miR-375-3p	trimmed	other
mmu-miR-375-3p-0-1-A	14.74	-0.82	1.03	-0.8	0.4242		non-significant	mmu-miR-375-3p	NT tail	A
mmu-miR-375-3p-1-1-T	4.35	-0.35	1.35	-0.26	0.7959		non-significant	mmu-miR-375-3p	ambiguous tail	U
mmu-miR-375-3p-1-0--	3.98	0.49	1.58	0.31	0.758		non-significant	mmu-miR-375-3p	trimmed	other
mmu-miR-375-3p-2-0--	2.71	-0.13	1.55	-0.09	0.9322		non-significant	mmu-miR-375-3p	trimmed	other
mmu-miR-3535-0-0--	616.64	1.12	0.45	2.51	0.012	0.0952	non-significant	mmu-miR-3535	canonical	other
mmu-miR-3535-0-1-A	127.58	0.62	0.39	1.6	0.1105	0.3459	non-significant	mmu-miR-3535	NT tail	A
mmu-miR-3535-0-2-AA	6.87	1.39	1.38	1.01	0.3133		non-significant	mmu-miR-3535	NT tail	AA
mmu-miR-149-5p-0-0--	814.44	-0.81	0.33	-2.46	0.0137	0.1023	non-significant	mmu-miR-149-5p	canonical	other
mmu-miR-149-5p-0-1-T	363.1	-0.49	0.63	-0.79	0.4303	0.7164	non-significant	mmu-miR-149-5p	NT tail	U
mmu-miR-149-5p-1-0--	221.97	-0.76	0.34	-2.25	0.0246	0.1466	non-significant	mmu-miR-149-5p	trimmed	other
mmu-miR-149-5p-2-0--	225.72	-0.32	0.37	-0.87	0.3831	0.6648	non-significant	mmu-miR-149-5p	trimmed	other
mmu-miR-149-5p-3-0--	23.16	-1.35	0.59	-2.29	0.022	0.1379	non-significant	mmu-miR-149-5p	trimmed	other
mmu-miR-149-5p-0-1-A	6.57	-3.08	1.25	-2.47	0.0135		non-significant	mmu-miR-149-5p	NT tail	A
mmu-miR-128-1-5p-0-0--	692.05	0.04	0.34	0.11	0.9106	0.9699	non-significant	mmu-miR-128-1-5p	canonical	other
mmu-miR-128-1-5p-0-2-GA	414.18	-0.21	0.27	-0.78	0.4361	0.7203	non-significant	mmu-miR-128-1-5p	ambiguous tail	other
mmu-miR-128-1-5p-0-1-G	53.71	0.04	0.47	0.08	0.9342	0.9745	non-significant	mmu-miR-128-1-5p	ambiguous tail	G
mmu-miR-128-1-5p-0-3-GAA	26.52	0.13	0.5	0.26	0.7978	0.9194	non-significant	mmu-miR-128-1-5p	NT tail	other
mmu-miR-128-1-5p-2-0--	11.36	-0.21	0.74	-0.29	0.7721		non-significant	mmu-miR-128-1-5p	trimmed	other
mmu-miR-128-1-5p-0-3-GAT	2.63	-1.83	1.98	-0.93	0.3548		non-significant	mmu-miR-128-1-5p	NT tail	other
mmu-miR-128-1-5p-1-0--	5.46	-1.55	1.46	-1.06	0.2903		non-significant	mmu-miR-128-1-5p	trimmed	other
mmu-miR-128-3p-1-2-0-0--	31017	0.08	0.26	0.31	0.7561	0.9068	non-significant	mmu-miR-128-3p-1-2	canonical	other
mmu-miR-128-3p-1-2-0-1-C	14243.3	-0.03	0.2	-0.15	0.878	0.9574	non-significant	mmu-miR-128-3p-1-2	NT tail	C
mmu-miR-128-3p-1-2-0-1-T	12833.3	0.14	0.26	0.52	0.6025	0.833	non-significant	mmu-miR-128-3p-1-2	NT tail	U
mmu-miR-128-3p-1-2-1-0--	6126.74	0.26	0.26	0.99	0.3208	0.6087	non-significant	mmu-miR-128-3p-1-2	trimmed	other
mmu-miR-128-3p-1-2-2-0--	2447.25	0.47	0.22	2.17	0.0303	0.1678	non-significant	mmu-miR-128-3p-1-2	trimmed	other
mmu-miR-128-3p-1-2-0-2-TT	1219.27	0.03	0.24	0.12	0.9073	0.9694	non-significant	mmu-miR-128-3p-1-2	NT tail	UU
mmu-miR-128-3p-1-2-0-2-CT	553.7	-0.13	0.31	-0.41	0.6826	0.8752	non-significant	mmu-miR-128-3p-1-2	NT tail	other
mmu-miR-128-3p-1-2-3-0--	314.42	0.6	0.22	2.73	0.0064	0.0629	non-significant	mmu-miR-128-3p-1-2	trimmed	other
mmu-miR-128-3p-1-2-0-1-A	1116.04	-0.88	0.57	-1.54	0.1227	0.3669	non-significant	mmu-miR-128-3p-1-2	NT tail	A
mmu-miR-128-3p-1-2-0-3-TTT	123.96	-0.09	0.36	-0.24	0.8122	0.926	non-significant	mmu-miR-128-3p-1-2	NT tail	UUU
mmu-miR-128-3p-1-2-0-2-TC	132.57	0.3	0.32	0.94	0.3484	0.6289	non-significant	mmu-miR-128-3p-1-2	NT tail	other
mmu-miR-128-3p-1-2-0-2-CA	251.64	-1	0.73	-1.36	0.1738	0.4356	non-significant	mmu-miR-128-3p-1-2	NT tail	other
mmu-miR-128-3p-1-2-0-2-AT	369.68	-0.83	0.73	-1.13	0.258	0.5442	non-significant	mmu-miR-128-3p-1-2	NT tail	AU
mmu-miR-128-3p-1-2-1-1-C	73.96	0.41	0.36	1.14	0.255	0.5414	non-significant	mmu-miR-128-3p-1-2	ambiguous tail	C
mmu-miR-128-3p-1-2-0-2-TA	127.24	-2.71	0.84	-3.21	0.0013	0.0228	significant	mmu-miR-128-3p-1-2	NT tail	UA
mmu-miR-128-3p-1-2-3-3-CTT	23.13	-0.39	0.55	-0.71	0.4781	0.7476	non-significant	mmu-miR-128-3p-1-2	ambiguous tail	other
mmu-miR-128-3p-1-2-0-2-CC	28.93	-0.26	0.47	-0.55	0.5841	0.818	non-significant	mmu-miR-128-3p-1-2	NT tail	other
mmu-miR-128-3p-1-2-0-3-CTT	18.22	-1.98	0.96	-2.07	0.0387	0.1946	non-significant	mmu-miR-128-3p-1-2	NT tail	other
mmu-miR-128-3p-1-2-1-1-A	88.38	-2.58	0.88	-2.92	0.0035	0.0421	significant	mmu-miR-128-3p-1-2	ambiguous tail	A
mmu-miR-128-3p-1-2-0-3-TTC	13.82	0.01	1.13	0.01	0.9952		non-significant	mmu-miR-128-3p-1-2	NT tail	other
mmu-miR-128-3p-1-2-1-2-AT	94.88	-5.64	1.32	-4.27	0	0.0015	significant	mmu-miR-128-3p-1-2	ambiguous tail	AU
mmu-miR-128-3p-1-2-0-2-AA	105.05	-5.28	1.33	-3.96	0.0001	0.0035	significant	mmu-miR-128-3p-1-2	NT tail	AA
mmu-miR-128-3p-1-2-4-3-TTT	12.4	-0.48	1.52	-0.31	0.7532		non-significant	mmu-miR-128-3p-1-2	ambiguous tail	UUU
mmu-miR-128-3p-1-2-0-3-TAT	31.34	0.48	1.99	0.24	0.8104	0.9251	non-significant	mmu-miR-128-3p-1-2	NT tail	UAU
mmu-miR-128-3p-1-2-1-1-G	19.69	0.33	1.01	0.33	0.7436	0.9004	non-significant	mmu-miR-128-3p-1-2	ambiguous tail	G
mmu-miR-128-3p-1-2-0-2-GT	21.51	-4.39	1.49	-2.96	0.0031	0.039	significant	mmu-miR-128-3p-1-2	NT tail	other
mmu-miR-128-3p-1-2-0-1-G	42.82	-1.52	0.84	-1.8	0.0712	0.2712	non-significant	mmu-miR-128-3p-1-2	NT tail	G
mmu-miR-135b-5p-0-0--	11.09	-0.36	0.87	-0.41	0.6817		non-significant	mmu-miR-135b-5p	canonical	other
mmu-miR-135b-5p-1-0--	19.03	1.01	0.88	1.15	0.2518	0.5382	non-significant	mmu-miR-135b-5p	trimmed	other
mmu-miR-135b-5p-0-1-A	12.12	0	0.76	0	0.9983		non-significant	mmu-miR-135b-5p	NT tail	A
mmu-miR-135b-5p-2-0--	13.3	0.04	0.89	0.05	0.964		non-significant	mmu-miR-135b-5p	trimmed	other
mmu-miR-135b-5p-1-1-T	6.44	-0.34	1.36	-0.25	0.8039		non-significant	mmu-miR-135b-5p	ambiguous tail	U
mmu-miR-1231-3p-1-0--	3.57	0.63	1.19	0.53	0.5983		non-significant	mmu-miR-1231-3p	trimmed	other
mmu-miR-181a-5p-1-2-0-0--	557842	0.38	0.16	2.38	0.0175	0.1211	non-significant	mmu-miR-181a-5p-1-2	canonical	other
mmu-miR-181a-5p-1-2-1-0--	84280.2	0.46	0.17	2.68	0.0073	0.0672	non-significant	mmu-miR-181a-5p-1-2	trimmed	other
mmu-miR-181a-5p-1-2-0-1-T	14137.5	0.2	0.14	1.44	0.1491	0.4029	non-significant	mmu-miR-181a-5p-1-2	NT tail	U
mmu-miR-181a-5p-1-2-2-0--	15145	0.56	0.29	1.91	0.0557	0.2429	non-significant	mmu-miR-181a-5p-1-2	trimmed	other
mmu-miR-181a-5p-1-2-3-1-T	9170.2	0.53	0.24	2.25	0.0243	0.146	non-significant	mmu-miR-181a-5p-1-2	ambiguous tail	U
mmu-miR-181a-5p-1-2-3-0--	7609.01	1.07	0.28	3.83	0.0001	0.0051	significant	mmu-miR-181a-5p-1-2	trimmed	other
mmu-miR-181a-5p-1-2-1-1-A	4518.18	0.43	0.25	1.74	0.0824	0.2941	non-significant	mmu-miR-181a-5p-1-2	ambiguous tail	A
mmu-miR-181a-5p-1-2-2-1-A	4184.01	-0.22	0.28	-0.79	0.4297	0.716	non-significant	mmu-miR-181a-5p-1-2	ambiguous tail	A
mmu-miR-181a-5p-1-2-3-1-G	6367.57	1.59	0.27	5.97	0	0	significant	mmu-miR-181a-5p-1-2	ambiguous tail	G
mmu-miR-181a-5p-1-2-0-2-TT	1618.75	0.07	0.17	0.42	0.6775	0.874	non-significant	mmu-miR-181a-5p-1-2	NT tail	UU
mmu-miR-181a-5p-1-2-1-1-G	1188.02	1.45	0.24	6.16	0	0	significant	mmu-miR-181a-5p-1-2	ambiguous tail	G
mmu-miR-181a-5p-1-2-4-1-T	353.84	1.28	0.32	3.97	0.0001	0.0034	significant	mmu-miR-181a-5p-1-2	ambiguous tail	U
mmu-miR-181a-5p-1-2-0-3-TTT	165.01	-0.06	0.26	-0.23	0.8154	0.9276	non-significant	mmu-miR-181a-5p-1-2	NT tail	UUU
mmu-miR-181a-5p-1-2-2-1-T	256.61	0.42	0.27	1.51	0.1305	0.3788	non-significant	mmu-miR-181a-5p-1-2	ambiguous tail	U
mmu-miR-181a-5p-1-2-4-1-A	271.92	0.69	0.36	1.9	0.0576	0.2458	non-significant	mmu-miR-181a-5p-1-2	ambiguous tail	A
mmu-miR-181a-5p-1-2-3-3-GGT	120.72	0.1	0.3	0.32	0.7454	0.9006	non-significant	mmu-miR-181a-5p-1-2	ambiguous tail	other
mmu-miR-181a-5p-1-2-1-1-C	194.58	1.09	0.47	2.31	0.021	0.1361	non-significant	mmu-miR-181a-5p-1-2	ambiguous tail	C
mmu-miR-181a-5p-1-2-1-2-AA	141.62	-0.43	0.39	-1.12	0.2645	0.5507	non-significant	mmu-miR-181a-5p-1-2	ambiguous tail	AA
mmu-miR-181a-5p-1-2-8-8-AGGTGAGT	144.56	0.82	0.26	3.1	0.0019	0.0292	non-significant	mmu-miR-181a-5p-1-2	ambiguous tail	other
mmu-miR-181a-5p-1-2-9-9-ACGGTGAGT	104.71	-0.03	0.39	-0.09	0.9313	0.9745	non-significant	mmu-miR-181a-5p-1-2	ambiguous tail	other
mmu-miR-181a-5p-1-2-5-5-CGAGT	90.74	0.41	0.38	1.08	0.2813	0.5668	non-significant	mmu-miR-181a-5p-1-2	ambiguous tail	other
mmu-miR-181a-5p-1-2-3-2-GG	143.65	1.39	0.27	5.1	0	0	significant	mmu-miR-181a-5p-1-2	ambiguous tail	other
mmu-miR-181a-5p-1-2-2-2-AA	141.58	0.06	0.37	0.17	0.8649	0.9487	non-significant	mmu-miR-181a-5p-1-2	ambiguous tail	AA
mmu-miR-181a-5p-1-2-5-5-AGAGT	89.31	0.32	0.35	0.91	0.3609	0.6422	non-significant	mmu-miR-181a-5p-1-2	ambiguous tail	other
mmu-miR-181a-5p-1-2-0-1-A	81.05	0.04	0.45	0.08	0.933	0.9745	non-significant	mmu-miR-181a-5p-1-2	NT tail	A
mmu-miR-181a-5p-1-2-8-8-TGGTGAGT	55.85	0.54	0.41	1.31	0.19	0.4589	non-significant	mmu-miR-181a-5p-1-2	ambiguous tail	other
mmu-miR-181a-5p-1-2-9-9-CCGGTGAGT	73.08	0.11	0.33	0.34	0.7318	0.8989	non-significant	mmu-miR-181a-5p-1-2	ambiguous tail	other
mmu-miR-181a-5p-1-2-2-2-TT	90.69	0.9	0.35	2.54	0.011	0.0901	non-significant	mmu-miR-181a-5p-1-2	ambiguous tail	UU
mmu-miR-181a-5p-1-2-7-7-AGTGAGT	49.11	-0.16	0.38	-0.43	0.6649	0.8677	non-significant	mmu-miR-181a-5p-1-2	ambiguous tail	other
mmu-miR-181a-5p-1-2-10-10-ATCGGTGAGT	46.08	0.35	0.49	0.73	0.4682	0.7429	non-significant	mmu-miR-181a-5p-1-2	ambiguous tail	other
mmu-miR-181a-5p-1-2-7-7-TGTGAGT	79.78	1.23	0.31	3.99	0.0001	0.0034	significant	mmu-miR-181a-5p-1-2	ambiguous tail	other
mmu-miR-181a-5p-1-2-10-8-CGGTGAGT	51.57	0.48	0.38	1.28	0.199	0.4715	non-significant	mmu-miR-181a-5p-1-2	ambiguous tail	other
mmu-miR-181a-5p-1-2-10-10-CTCGGTGAGT	45.27	0.4	0.39	1.02	0.3081	0.5945	non-significant	mmu-miR-181a-5p-1-2	ambiguous tail	other
mmu-miR-181a-5p-1-2-8-7-GGTGAGT	37.27	0.91	0.72	1.27	0.2029	0.4734	non-significant	mmu-miR-181a-5p-1-2	ambiguous tail	other
mmu-miR-181a-5p-1-2-2-2-AT	40.23	-0.25	0.43	-0.57	0.5663	0.8126	non-significant	mmu-miR-181a-5p-1-2	ambiguous tail	AU
mmu-miR-181a-5p-1-2-10-10-TTCGGTGAGT	60.71	0.77	0.48	1.61	0.1078	0.3419	non-significant	mmu-miR-181a-5p-1-2	ambiguous tail	other
mmu-miR-181a-5p-1-2-6-6-TTGAGT	50.91	0.83	0.4	2.1	0.0353	0.1847	non-significant	mmu-miR-181a-5p-1-2	ambiguous tail	other
mmu-miR-181a-5p-1-2-6-6-ATGAGT	31.3	0.16	0.46	0.34	0.7303	0.8989	non-significant	mmu-miR-181a-5p-1-2	ambiguous tail	other
mmu-miR-181a-5p-1-2-7-7-CGTGAGT	28.67	0.58	0.52	1.12	0.264	0.5507	non-significant	mmu-miR-181a-5p-1-2	ambiguous tail	other
mmu-miR-181a-5p-1-2-4-4-TAGT	51.26	1.08	0.46	2.35	0.0186	0.126	non-significant	mmu-miR-181a-5p-1-2	ambiguous tail	other
mmu-miR-181a-5p-1-2-0-3-TGT	16.62	-1.95	1.46	-1.33	0.1835		non-significant	mmu-miR-181a-5p-1-2	NT tail	other
mmu-miR-181a-5p-1-2-0-1-G	27.75	0.99	0.55	1.82	0.0689	0.2674	non-significant	mmu-miR-181a-5p-1-2	NT tail	G
mmu-miR-181a-5p-1-2-5-5-GGAGT	45.49	-0.59	0.89	-0.66	0.5079	0.7666	non-significant	mmu-miR-181a-5p-1-2	ambiguous tail	other
mmu-miR-181a-5p-1-2-3-3-TGT	29.22	0.49	0.57	0.87	0.3869	0.6673	non-significant	mmu-miR-181a-5p-1-2	ambiguous tail	other
mmu-miR-181a-5p-1-2-2-1-C	111.38	3.44	0.81	4.24	0	0.0015	significant	mmu-miR-181a-5p-1-2	ambiguous tail	C
mmu-miR-181a-5p-1-2-2-2-CT	16.41	0.38	0.58	0.66	0.5099		non-significant	mmu-miR-181a-5p-1-2	ambiguous tail	other
mmu-miR-181a-5p-1-2-0-2-TA	9.58	-4.2	1.96	-2.14	0.0324		non-significant	mmu-miR-181a-5p-1-2	NT tail	UA
mmu-miR-181b-5p-1-2-2-0--	8844.36	1.03	0.14	7.32	0	0	significant	mmu-miR-181b-5p-1-2	trimmed	other
mmu-miR-181b-5p-1-2-1-0--	5611.7	0.81	0.21	3.85	0.0001	0.005	non-significant	mmu-miR-181b-5p-1-2	trimmed	other
mmu-miR-181b-5p-1-2-3-1-A	5643.51	0.25	0.17	1.48	0.1382	0.3872	non-significant	mmu-miR-181b-5p-1-2	ambiguous tail	A
mmu-miR-181b-5p-1-2-0-0--	3890.51	0.57	0.19	3.02	0.0026	0.0343	non-significant	mmu-miR-181b-5p-1-2	canonical	other
mmu-miR-181b-5p-1-2-3-0--	1010.7	1.23	0.28	4.4	0	0.001	significant	mmu-miR-181b-5p-1-2	trimmed	other
mmu-miR-181b-5p-1-2-2-1-A	725.42	0.55	0.27	2.05	0.0406	0.2001	non-significant	mmu-miR-181b-5p-1-2	ambiguous tail	A
mmu-miR-181b-5p-1-2-4-1-T	643.58	1.06	0.32	3.26	0.0011	0.0204	significant	mmu-miR-181b-5p-1-2	ambiguous tail	U
mmu-miR-181b-5p-1-2-0-1-T	346.34	0.19	0.34	0.57	0.5719	0.8158	non-significant	mmu-miR-181b-5p-1-2	NT tail	U
mmu-miR-181b-5p-1-2-2-1-G	314.87	2.21	0.33	6.63	0	0	significant	mmu-miR-181b-5p-1-2	ambiguous tail	G
mmu-miR-181b-5p-1-2-0-2-TT	110.89	-0.13	0.37	-0.36	0.7209	0.8956	non-significant	mmu-miR-181b-5p-1-2	NT tail	UU
mmu-miR-181b-5p-1-2-3-1-T	143.21	0.97	0.26	3.74	0.0002	0.0062	non-significant	mmu-miR-181b-5p-1-2	ambiguous tail	U
mmu-miR-181b-5p-1-2-2-2-AA	88.44	-0.3	0.42	-0.72	0.4691	0.7429	non-significant	mmu-miR-181b-5p-1-2	ambiguous tail	AA
mmu-miR-181b-5p-1-2-1-1-A	67.93	0.26	0.41	0.63	0.5267	0.7842	non-significant	mmu-miR-181b-5p-1-2	ambiguous tail	A
mmu-miR-181b-5p-1-2-2-2-AT	40	-0.15	0.45	-0.34	0.736	0.8989	non-significant	mmu-miR-181b-5p-1-2	ambiguous tail	AU
mmu-miR-181b-5p-1-2-0-3-TTT	29.62	0.05	0.55	0.08	0.9338	0.9745	non-significant	mmu-miR-181b-5p-1-2	NT tail	UUU
mmu-miR-181b-5p-1-2-4-2-TT	43.16	0.86	0.44	1.97	0.0484	0.2229	non-significant	mmu-miR-181b-5p-1-2	ambiguous tail	UU
mmu-miR-181b-5p-1-2-3-2-AT	31.94	0.45	0.55	0.82	0.4119	0.6968	non-significant	mmu-miR-181b-5p-1-2	ambiguous tail	AU
mmu-miR-181b-5p-1-2-3-2-AA	61.34	0.28	0.4	0.71	0.4767	0.7476	non-significant	mmu-miR-181b-5p-1-2	ambiguous tail	AA
mmu-miR-181b-5p-1-2-1-2-AT	17.99	-1.89	1.46	-1.3	0.1938	0.463	non-significant	mmu-miR-181b-5p-1-2	ambiguous tail	AU
mmu-miR-181b-5p-1-2-3-2-TA	23.43	0.53	0.64	0.83	0.4052	0.6887	non-significant	mmu-miR-181b-5p-1-2	ambiguous tail	UA
mmu-miR-181b-5p-1-2-3-3-TAA	15.94	-1.55	1.41	-1.1	0.2717		non-significant	mmu-miR-181b-5p-1-2	ambiguous tail	UAA
mmu-miR-181b-5p-1-2-0-1-A	8.72	-4.16	1.99	-2.09	0.0363		non-significant	mmu-miR-181b-5p-1-2	NT tail	A
mmu-miR-181b-1-3p-1-1-T	74.77	0.72	0.39	1.85	0.0637	0.2583	non-significant	mmu-miR-181b-1-3p	ambiguous tail	U
mmu-miR-181b-1-3p-0-1-T	43.84	0.32	0.5	0.64	0.5203	0.7783	non-significant	mmu-miR-181b-1-3p	NT tail	U
mmu-miR-181b-1-3p-1-0--	3.1	-0.32	1.56	-0.2	0.8401		non-significant	mmu-miR-181b-1-3p	trimmed	other
mmu-miR-8114-0-0--	52.34	-0.97	0.52	-1.88	0.0606	0.2542	non-significant	mmu-miR-8114	canonical	other
mmu-miR-8114-0-3-CGC	17.8	-1.97	0.88	-2.23	0.0259	0.152	non-significant	mmu-miR-8114	ambiguous tail	other
mmu-miR-8114-0-1-C	9.39	-0.18	1.05	-0.17	0.8645		non-significant	mmu-miR-8114	ambiguous tail	C
mmu-miR-8114-0-3-CGT	7.14	-0.42	1.14	-0.37	0.7114		non-significant	mmu-miR-8114	NT tail	other
mmu-miR-8114-0-2-CG	9.83	-2.1	1.25	-1.68	0.0938		non-significant	mmu-miR-8114	ambiguous tail	other
mmu-miR-8114-0-2-CT	18.59	-0.72	1.03	-0.7	0.4846	0.7477	non-significant	mmu-miR-8114	NT tail	other
mmu-miR-488-5p-0-2-AC	342.7	-0.18	0.24	-0.75	0.4506	0.7299	non-significant	mmu-miR-488-5p	ambiguous tail	other
mmu-miR-488-5p-0-0--	36.29	0.44	0.56	0.79	0.4285	0.7147	non-significant	mmu-miR-488-5p	canonical	other
mmu-miR-488-5p-0-1-A	41.12	0.01	0.57	0.01	0.9904	0.9952	non-significant	mmu-miR-488-5p	ambiguous tail	A
mmu-miR-488-5p-1-0--	21.91	0.09	0.69	0.13	0.894	0.9673	non-significant	mmu-miR-488-5p	trimmed	other
mmu-miR-488-5p-0-3-ACT	22.18	0.19	0.58	0.33	0.7417	0.8989	non-significant	mmu-miR-488-5p	NT tail	other
mmu-miR-488-5p-2-0--	17.38	1.52	0.64	2.38	0.0174	0.1203	non-significant	mmu-miR-488-5p	trimmed	other
mmu-miR-488-5p-0-2-AA	5.12	-0.47	1.35	-0.35	0.7262		non-significant	mmu-miR-488-5p	NT tail	AA
mmu-miR-488-5p-0-1-T	3.42	-0.08	1.43	-0.06	0.9556		non-significant	mmu-miR-488-5p	NT tail	U
mmu-miR-488-5p-2-1-T	7.79	0.54	0.95	0.57	0.569		non-significant	mmu-miR-488-5p	ambiguous tail	U
mmu-miR-488-5p-1-1-T	2.27	-0.36	1.64	-0.22	0.8286		non-significant	mmu-miR-488-5p	ambiguous tail	U
mmu-miR-488-5p-0-3-ACG	0.49	-0.94	3.72	-0.25	0.7998		non-significant	mmu-miR-488-5p	NT tail	other
mmu-miR-488-3p-0-0--	4088.98	0.63	0.26	2.41	0.0161	0.1154	non-significant	mmu-miR-488-3p	canonical	other
mmu-miR-488-3p-0-1-T	2145.7	0.3	0.22	1.36	0.1725	0.4354	non-significant	mmu-miR-488-3p	NT tail	U
mmu-miR-488-3p-1-0--	200.66	0.57	0.56	1.01	0.3102	0.5968	non-significant	mmu-miR-488-3p	trimmed	other
mmu-miR-488-3p-1-1-A	189.8	0.81	0.32	2.52	0.0118	0.0945	non-significant	mmu-miR-488-3p	ambiguous tail	A
mmu-miR-488-3p-1-1-T	27.81	1.22	0.6	2.02	0.0437	0.209	non-significant	mmu-miR-488-3p	ambiguous tail	U
mmu-miR-1927-2-0--	11.82	-0.87	0.74	-1.18	0.24		non-significant	mmu-miR-1927	trimmed	other
mmu-miR-199a-5p-1-2-0-0--	145.23	1.79	0.68	2.61	0.009	0.0796	non-significant	mmu-miR-199a-5p-1-2	canonical	other
mmu-miR-199a-5p-1-2-1-1-T	23.83	0.74	0.54	1.37	0.1697	0.4333	non-significant	mmu-miR-199a-5p-1-2	ambiguous tail	U
mmu-miR-199a-5p-1-2-0-1-T	12.18	-0.25	0.84	-0.3	0.7616		non-significant	mmu-miR-199a-5p-1-2	NT tail	U
mmu-miR-199a-5p-1-2-1-0--	25.42	1.13	0.98	1.15	0.249	0.5345	non-significant	mmu-miR-199a-5p-1-2	trimmed	other
mmu-miR-199a-5p-1-2-2-0--	17.26	0.6	0.59	1.01	0.3114		non-significant	mmu-miR-199a-5p-1-2	trimmed	other
mmu-miR-199a-5p-1-2-3-0--	2.71	-0.92	1.42	-0.65	0.5169		non-significant	mmu-miR-199a-5p-1-2	trimmed	other
mmu-miR-199a-3p-1-2-199b-3p-1-0--	387.41	0.47	0.32	1.45	0.1459	0.3952	non-significant	mmu-miR-199a-3p-1-2-199b-3p	trimmed	other
mmu-miR-199a-3p-1-2-199b-3p-0-0--	114.32	0.8	0.6	1.33	0.1838	0.4497	non-significant	mmu-miR-199a-3p-1-2-199b-3p	canonical	other
mmu-miR-199a-3p-1-2-199b-3p-2-0--	29.27	0.67	0.59	1.13	0.2599	0.547	non-significant	mmu-miR-199a-3p-1-2-199b-3p	trimmed	other
mmu-miR-199a-3p-1-2-199b-3p-2-1-A	24.81	0.8	0.78	1.03	0.3039	0.5922	non-significant	mmu-miR-199a-3p-1-2-199b-3p	ambiguous tail	A
mmu-miR-199a-3p-1-2-199b-3p-1-1-T	18.13	0.25	1.27	0.2	0.8428	0.9365	non-significant	mmu-miR-199a-3p-1-2-199b-3p	ambiguous tail	U
mmu-miR-199a-3p-1-2-199b-3p-0-2-TT	11.73	1.09	0.73	1.49	0.1365		non-significant	mmu-miR-199a-3p-1-2-199b-3p	NT tail	UU
mmu-miR-199a-3p-1-2-199b-3p-0-1-T	7.63	-0.52	1.08	-0.49	0.627		non-significant	mmu-miR-199a-3p-1-2-199b-3p	NT tail	U
mmu-miR-199a-3p-1-2-199b-3p-0-1-A	7.01	0.11	1.04	0.11	0.9156		non-significant	mmu-miR-199a-3p-1-2-199b-3p	NT tail	A
mmu-miR-214-3p-0-0--	8.81	-1.57	0.92	-1.72	0.0858		non-significant	mmu-miR-214-3p	canonical	other
mmu-miR-350-3p-0-0--	24.96	-0.62	0.88	-0.7	0.4839	0.7477	non-significant	mmu-miR-350-3p	canonical	other
mmu-miR-350-3p-0-1-A	23.69	-1.01	0.72	-1.4	0.1608	0.418	non-significant	mmu-miR-350-3p	NT tail	A
mmu-miR-350-3p-1-0--	12.62	-0.98	0.79	-1.25	0.2121		non-significant	mmu-miR-350-3p	trimmed	other
mmu-miR-350-3p-2-0--	17.26	-0.71	0.63	-1.13	0.26		non-significant	mmu-miR-350-3p	trimmed	other
mmu-miR-350-3p-0-2-AC	7.86	-0.45	0.88	-0.51	0.6107		non-significant	mmu-miR-350-3p	NT tail	other
mmu-miR-350-5p-0-2-AC	27.15	-0.12	0.58	-0.21	0.8332	0.9333	non-significant	mmu-miR-350-5p	NT tail	other
mmu-miR-350-5p-0-3-ACT	16.67	-0.37	0.59	-0.63	0.5312		non-significant	mmu-miR-350-5p	NT tail	other
mmu-miR-350-5p-0-3-ACA	16.92	-0.97	0.63	-1.54	0.124		non-significant	mmu-miR-350-5p	NT tail	other
mmu-miR-1981-3p-0-1-A	67.5	-0.64	0.77	-0.83	0.407	0.6903	non-significant	mmu-miR-1981-3p	NT tail	A
mmu-miR-1981-3p-0-3-AGT	49.64	-0.86	0.43	-2.03	0.0427	0.2061	non-significant	mmu-miR-1981-3p	NT tail	other
mmu-miR-1981-3p-0-0--	19.12	-0.7	0.75	-0.94	0.3466	0.6279	non-significant	mmu-miR-1981-3p	canonical	other
mmu-miR-1981-3p-1-0--	9.29	-0.75	0.85	-0.88	0.3764		non-significant	mmu-miR-1981-3p	trimmed	other
mmu-miR-1981-3p-0-1-T	5.94	0.77	1.18	0.65	0.5142		non-significant	mmu-miR-1981-3p	NT tail	U
mmu-miR-664-5p-0-1-A	78.58	0.32	0.39	0.82	0.4127	0.6969	non-significant	mmu-miR-664-5p	ambiguous tail	A
mmu-miR-664-5p-0-0--	9.54	-0.02	0.83	-0.02	0.9826		non-significant	mmu-miR-664-5p	canonical	other
mmu-miR-664-5p-0-2-AT	2.92	-0.79	1.31	-0.6	0.5469		non-significant	mmu-miR-664-5p	ambiguous tail	AU
mmu-miR-664-5p-2-0--	9.31	-0.06	0.93	-0.06	0.9488		non-significant	mmu-miR-664-5p	trimmed	other
mmu-miR-664-5p-0-2-AA	4.55	0.89	1.3	0.68	0.4955		non-significant	mmu-miR-664-5p	NT tail	AA
mmu-miR-664-3p-1-0--	649.03	-0.83	0.26	-3.18	0.0015	0.0251	non-significant	mmu-miR-664-3p	trimmed	other
mmu-miR-664-3p-0-1-C	50	-1.23	0.4	-3.07	0.0022	0.0318	significant	mmu-miR-664-3p	ambiguous tail	C
mmu-miR-664-3p-0-2-CA	54.58	-1.01	0.5	-2.02	0.0435	0.2087	non-significant	mmu-miR-664-3p	ambiguous tail	other
mmu-miR-664-3p-0-1-T	26.02	-0.6	0.58	-1.02	0.3066	0.5945	non-significant	mmu-miR-664-3p	NT tail	U
mmu-miR-664-3p-0-0--	21.29	-1.5	0.58	-2.56	0.0103	0.0848	non-significant	mmu-miR-664-3p	canonical	other
mmu-miR-664-3p-2-1-G	15.91	0.46	0.77	0.6	0.5488		non-significant	mmu-miR-664-3p	ambiguous tail	G
mmu-miR-664-3p-0-2-CT	18.53	-1.84	0.67	-2.76	0.0059	0.0593	non-significant	mmu-miR-664-3p	NT tail	other
mmu-miR-664-3p-0-3-CAC	21.98	-1.22	0.73	-1.68	0.092	0.3123	non-significant	mmu-miR-664-3p	ambiguous tail	other
mmu-miR-664-3p-2-0--	3.4	-0.04	1.5	-0.03	0.9784		non-significant	mmu-miR-664-3p	trimmed	other
mmu-miR-664-3p-0-2-TT	5.7	-2.1	1.28	-1.64	0.1009		non-significant	mmu-miR-664-3p	NT tail	UU
mmu-miR-664-3p-0-2-AA	1.71	-0.24	2.47	-0.1	0.9229		non-significant	mmu-miR-664-3p	NT tail	AA
mmu-miR-194-5p-1-2-0-0--	180.57	0.14	0.27	0.51	0.6099	0.8382	non-significant	mmu-miR-194-5p-1-2	canonical	other
mmu-miR-194-5p-1-2-0-1-A	74.76	-0.04	0.32	-0.13	0.8973	0.9675	non-significant	mmu-miR-194-5p-1-2	NT tail	A
mmu-miR-194-5p-1-2-1-0--	57.03	0.84	0.54	1.56	0.1193	0.3614	non-significant	mmu-miR-194-5p-1-2	trimmed	other
mmu-miR-194-5p-1-2-0-1-T	54.12	0.62	0.38	1.62	0.105	0.3372	non-significant	mmu-miR-194-5p-1-2	NT tail	U
mmu-miR-194-5p-1-2-1-1-T	49.33	0.6	0.42	1.45	0.1458	0.3952	non-significant	mmu-miR-194-5p-1-2	ambiguous tail	U
mmu-miR-194-5p-1-2-0-2-AT	15.21	0.42	0.86	0.48	0.6298		non-significant	mmu-miR-194-5p-1-2	NT tail	AU
mmu-miR-194-5p-1-2-0-2-TT	4.69	-0.06	1.12	-0.05	0.9606		non-significant	mmu-miR-194-5p-1-2	NT tail	UU
mmu-miR-194-5p-1-2-0-2-AA	1.84	-1.38	2.27	-0.61	0.5419		non-significant	mmu-miR-194-5p-1-2	NT tail	AA
mmu-miR-215-5p-0-1-C	3.43	-0.98	1.4	-0.7	0.4808		non-significant	mmu-miR-215-5p	ambiguous tail	C
mmu-miR-215-5p-0-1-A	2.32	0.97	1.63	0.6	0.5499		non-significant	mmu-miR-215-5p	NT tail	A
mmu-miR-205-5p-0-1-T	3.59	-1.07	1.41	-0.76	0.4466		non-significant	mmu-miR-205-5p	NT tail	U
mmu-miR-29b-2-5p-2-0--	7.9	-0.51	1.04	-0.49	0.6231		non-significant	mmu-miR-29b-2-5p	trimmed	other
mmu-miR-29b-2-5p-1-0--	9.52	-0.17	0.93	-0.19	0.8525		non-significant	mmu-miR-29b-2-5p	trimmed	other
mmu-miR-29b-2-5p-3-1-T	5.92	0.28	1.07	0.26	0.7945		non-significant	mmu-miR-29b-2-5p	ambiguous tail	U
mmu-miR-29c-5p-1-0--	11.47	0.19	0.8	0.24	0.8077		non-significant	mmu-miR-29c-5p	trimmed	other
mmu-miR-29c-5p-0-1-A	5.31	-1.43	1.28	-1.11	0.2673		non-significant	mmu-miR-29c-5p	ambiguous tail	A
mmu-miR-29c-5p-0-0--	4.2	0.69	1.26	0.54	0.5865		non-significant	mmu-miR-29c-5p	canonical	other
mmu-miR-29c-5p-0-3-AGA	6.52	0.49	1.09	0.45	0.6553		non-significant	mmu-miR-29c-5p	ambiguous tail	other
mmu-miR-29c-5p-0-1-T	6.16	-0.85	1.05	-0.81	0.4166		non-significant	mmu-miR-29c-5p	NT tail	U
mmu-miR-6906-3p-0-1-T	16.51	-0.51	0.73	-0.7	0.4812		non-significant	mmu-miR-6906-3p	NT tail	U
mmu-miR-1930-5p-0-0--	2.87	-0.46	1.31	-0.35	0.7288		non-significant	mmu-miR-1930-5p	canonical	other
mmu-miR-6911-3p-0-0--	4.83	-0.76	1.17	-0.66	0.5124		non-significant	mmu-miR-6911-3p	canonical	other
mmu-miR-6911-3p-0-1-T	6.79	0.61	0.87	0.7	0.4857		non-significant	mmu-miR-6911-3p	NT tail	U
mmu-miR-1982-3p-1-0--	16.94	-0.45	0.68	-0.67	0.5035		non-significant	mmu-miR-1982-3p	trimmed	other
mmu-miR-1982-3p-0-0--	12.36	-0.14	0.65	-0.22	0.8293		non-significant	mmu-miR-1982-3p	canonical	other
mmu-miR-1982-3p-2-0--	2.42	-0.09	2.08	-0.04	0.9645		non-significant	mmu-miR-1982-3p	trimmed	other
mmu-miR-3057-5p-0-0--	20.38	0.83	0.88	0.94	0.3464	0.6279	non-significant	mmu-miR-3057-5p	canonical	other
mmu-miR-3057-5p-1-0--	12.03	0.24	0.81	0.29	0.772		non-significant	mmu-miR-3057-5p	trimmed	other
mmu-miR-3057-5p-0-1-G	15.44	0.52	0.83	0.63	0.531		non-significant	mmu-miR-3057-5p	ambiguous tail	G
mmu-miR-3057-5p-0-2-GG	15.92	0.84	0.67	1.26	0.2067		non-significant	mmu-miR-3057-5p	ambiguous tail	other
mmu-miR-3057-5p-4-1-A	6.57	0.74	1.14	0.64	0.5195		non-significant	mmu-miR-3057-5p	ambiguous tail	A
mmu-miR-3057-5p-3-0--	18.45	1.61	0.82	1.96	0.0505	0.2263	non-significant	mmu-miR-3057-5p	trimmed	other
mmu-miR-3057-5p-0-2-GT	8.09	0.65	1.12	0.58	0.5628		non-significant	mmu-miR-3057-5p	NT tail	other
mmu-miR-6913-3p-0-0--	1.97	0.47	1.72	0.27	0.7837		non-significant	mmu-miR-6913-3p	canonical	other
mmu-miR-1191b-5p-0-0--	15.95	0.09	0.64	0.14	0.8921		non-significant	mmu-miR-1191b-5p	canonical	other
mmu-miR-1191b-5p-0-3-GCT	0.98	-0.53	2.71	-0.19	0.8462		non-significant	mmu-miR-1191b-5p	NT tail	other
mmu-miR-135a-2-3p-0-1-T	14.82	0.9	0.68	1.32	0.1877		non-significant	mmu-miR-135a-2-3p	NT tail	U
mmu-miR-135a-2-3p-0-1-A	5.75	0.46	1.49	0.31	0.7577		non-significant	mmu-miR-135a-2-3p	NT tail	A
mmu-miR-135a-5p-1-2-0-0--	129.15	0.14	0.53	0.27	0.7859	0.9089	non-significant	mmu-miR-135a-5p-1-2	canonical	other
mmu-miR-135a-5p-1-2-2-0--	15.52	0.48	0.67	0.72	0.4724		non-significant	mmu-miR-135a-5p-1-2	trimmed	other
mmu-miR-135a-5p-1-2-1-0--	20.5	0.75	0.71	1.06	0.2904	0.5778	non-significant	mmu-miR-135a-5p-1-2	trimmed	other
mmu-miR-135a-5p-1-2-1-1-G	15.3	1.74	0.78	2.24	0.0249		non-significant	mmu-miR-135a-5p-1-2	ambiguous tail	G
mmu-miR-135a-5p-1-2-3-0--	2.21	-0.37	1.57	-0.24	0.8118		non-significant	mmu-miR-135a-5p-1-2	trimmed	other
mmu-miR-1251-5p-1-0--	32.61	-0.21	0.72	-0.3	0.7678	0.9079	non-significant	mmu-miR-1251-5p	trimmed	other
mmu-miR-1251-5p-0-0--	6.07	-1.11	1.19	-0.93	0.3521		non-significant	mmu-miR-1251-5p	canonical	other
mmu-miR-7688-5p-0-0--	10.19	-0.52	1.13	-0.46	0.6461		non-significant	mmu-miR-7688-5p	canonical	other
mmu-miR-331-3p-1-0--	47.95	-1.55	0.42	-3.7	0.0002	0.0068	significant	mmu-miR-331-3p	trimmed	other
mmu-miR-331-3p-0-1-T	29.78	-1.98	0.56	-3.51	0.0004	0.0122	significant	mmu-miR-331-3p	NT tail	U
mmu-miR-331-3p-0-0--	22.93	-2.05	0.62	-3.33	0.0009	0.018	significant	mmu-miR-331-3p	canonical	other
mmu-miR-331-3p-1-2-CC	27.32	-1.51	0.79	-1.9	0.0574	0.2458	non-significant	mmu-miR-331-3p	ambiguous tail	other
mmu-miR-331-3p-1-2-CT	18.29	-0.78	0.68	-1.16	0.2465	0.5307	non-significant	mmu-miR-331-3p	ambiguous tail	other
mmu-miR-331-3p-1-1-C	19.19	-0.52	0.66	-0.78	0.4364	0.7203	non-significant	mmu-miR-331-3p	ambiguous tail	C
mmu-miR-331-3p-0-1-A	12.86	-1.51	0.81	-1.87	0.0612		non-significant	mmu-miR-331-3p	NT tail	A
mmu-miR-331-3p-0-1-C	12.9	-2.23	0.9	-2.48	0.013		non-significant	mmu-miR-331-3p	NT tail	C
mmu-miR-331-3p-2-0--	3.27	-1.91	1.49	-1.28	0.2006		non-significant	mmu-miR-331-3p	trimmed	other
mmu-miR-331-3p-2-1-T	4.31	1.6	1.17	1.37	0.1721		non-significant	mmu-miR-331-3p	ambiguous tail	U
mmu-miR-331-5p-1-0--	59.93	0.09	0.41	0.22	0.8239	0.9321	non-significant	mmu-miR-331-5p	trimmed	other
mmu-miR-331-5p-2-0--	10.02	0.17	0.81	0.21	0.8326		non-significant	mmu-miR-331-5p	trimmed	other
mmu-miR-331-5p-0-0--	2	-0.3	1.67	-0.18	0.8578		non-significant	mmu-miR-331-5p	canonical	other
mmu-miR-3059-5p-2-0--	862.27	-0.26	0.46	-0.57	0.5714	0.8158	non-significant	mmu-miR-3059-5p	trimmed	other
mmu-miR-3059-5p-1-0--	470.84	-0.52	0.34	-1.51	0.131	0.3798	non-significant	mmu-miR-3059-5p	trimmed	other
mmu-miR-3059-5p-0-0--	249.23	-0.55	0.32	-1.71	0.0865	0.3008	non-significant	mmu-miR-3059-5p	canonical	other
mmu-miR-3059-5p-0-1-G	220.96	-0.71	0.42	-1.68	0.0938	0.3159	non-significant	mmu-miR-3059-5p	ambiguous tail	G
mmu-miR-3059-5p-3-0--	179.73	-0.05	0.53	-0.09	0.93	0.9745	non-significant	mmu-miR-3059-5p	trimmed	other
mmu-miR-3059-5p-0-1-A	37.19	-1.04	0.56	-1.86	0.0624	0.2562	non-significant	mmu-miR-3059-5p	NT tail	A
mmu-miR-3059-5p-1-1-A	43.39	-0.81	0.63	-1.28	0.2017	0.4734	non-significant	mmu-miR-3059-5p	ambiguous tail	A
mmu-miR-3059-5p-0-1-T	30.21	-0.66	0.55	-1.19	0.2337	0.5151	non-significant	mmu-miR-3059-5p	NT tail	U
mmu-miR-3059-5p-2-1-T	29.13	-0.78	0.62	-1.25	0.2116	0.4832	non-significant	mmu-miR-3059-5p	ambiguous tail	U
mmu-miR-3059-5p-2-1-A	28.86	-2.09	0.69	-3.05	0.0023	0.0328	significant	mmu-miR-3059-5p	ambiguous tail	A
mmu-miR-3059-5p-3-1-T	13.02	-0.21	0.74	-0.28	0.7765		non-significant	mmu-miR-3059-5p	ambiguous tail	U
mmu-miR-3059-5p-3-1-A	14.71	-0.92	0.89	-1.03	0.3022		non-significant	mmu-miR-3059-5p	ambiguous tail	A
mmu-miR-3059-5p-2-2-TA	6.52	-2.15	1.58	-1.36	0.1733		non-significant	mmu-miR-3059-5p	ambiguous tail	UA
mmu-miR-3059-5p-0-2-GT	2.84	-1.78	1.84	-0.97	0.3326		non-significant	mmu-miR-3059-5p	ambiguous tail	other
mmu-miR-6412-8-7-TGCTACC	134.1	-0.1	0.39	-0.25	0.8005	0.9197	non-significant	mmu-miR-6412	ambiguous tail	other
mmu-miR-6412-8-8-TGCTACCA	42.99	-0.54	0.49	-1.09	0.2741	0.5611	non-significant	mmu-miR-6412	ambiguous tail	other
mmu-miR-6412-8-6-TGCTAC	6.53	-1.68	1.27	-1.33	0.1842		non-significant	mmu-miR-6412	ambiguous tail	other
mmu-let-7i-3p-1-0--	41.66	-0.44	0.45	-0.99	0.3222	0.6097	non-significant	mmu-let-7i-3p	trimmed	other
mmu-let-7i-3p-0-0--	19.1	-0.57	0.63	-0.91	0.365	0.6467	non-significant	mmu-let-7i-3p	canonical	other
mmu-let-7i-3p-2-0--	13.69	-0.1	0.87	-0.12	0.905		non-significant	mmu-let-7i-3p	trimmed	other
mmu-miR-26a-5p-1-2-0-0--	631478	0.68	0.2	3.41	0.0007	0.0154	non-significant	mmu-miR-26a-5p-1-2	canonical	other
mmu-miR-26a-5p-1-2-1-0--	89071.2	0.93	0.26	3.55	0.0004	0.0107	non-significant	mmu-miR-26a-5p-1-2	trimmed	other
mmu-miR-26a-5p-1-2-0-1-T	17789.5	0.79	0.31	2.58	0.01	0.0835	non-significant	mmu-miR-26a-5p-1-2	NT tail	U
mmu-miR-26a-5p-1-2-2-0--	8798.93	1.62	0.43	3.77	0.0002	0.0059	significant	mmu-miR-26a-5p-1-2	trimmed	other
mmu-miR-26a-5p-1-2-1-1-G	12597.4	2.33	0.4	5.85	0	0	significant	mmu-miR-26a-5p-1-2	ambiguous tail	G
mmu-miR-26a-5p-1-2-0-2-TT	2346.12	0.64	0.21	3.06	0.0022	0.032	non-significant	mmu-miR-26a-5p-1-2	NT tail	UU
mmu-miR-26a-5p-1-2-3-0--	2910.82	1.49	0.39	3.86	0.0001	0.0047	significant	mmu-miR-26a-5p-1-2	trimmed	other
mmu-miR-26a-5p-1-2-1-1-A	1441.03	0.86	0.41	2.13	0.0328	0.1777	non-significant	mmu-miR-26a-5p-1-2	ambiguous tail	A
mmu-miR-26a-5p-1-2-0-1-C	570.25	0.64	0.28	2.3	0.0213	0.1361	non-significant	mmu-miR-26a-5p-1-2	NT tail	C
mmu-miR-26a-5p-1-2-3-1-T	333.34	1.16	0.42	2.77	0.0056	0.057	non-significant	mmu-miR-26a-5p-1-2	ambiguous tail	U
mmu-miR-26a-5p-1-2-0-3-TTT	248.18	0.61	0.24	2.48	0.0132	0.0996	non-significant	mmu-miR-26a-5p-1-2	NT tail	UUU
mmu-miR-26a-5p-1-2-2-1-A	524.59	0.8	0.41	1.94	0.0522	0.232	non-significant	mmu-miR-26a-5p-1-2	ambiguous tail	A
mmu-miR-26a-5p-1-2-0-1-A	625.57	0.04	0.42	0.09	0.9264	0.9745	non-significant	mmu-miR-26a-5p-1-2	NT tail	A
mmu-miR-26a-5p-1-2-1-1-C	692.66	2.88	0.63	4.54	0	0.0006	significant	mmu-miR-26a-5p-1-2	ambiguous tail	C
mmu-miR-26a-5p-1-2-2-1-T	337.72	1.33	0.51	2.6	0.0093	0.0804	non-significant	mmu-miR-26a-5p-1-2	ambiguous tail	U
mmu-miR-26a-5p-1-2-5-5-GGGCT	134.03	0.4	0.39	1.04	0.3004	0.5903	non-significant	mmu-miR-26a-5p-1-2	ambiguous tail	other
mmu-miR-26a-5p-1-2-0-2-CT	141.05	0.49	0.24	2.01	0.0449	0.2128	non-significant	mmu-miR-26a-5p-1-2	NT tail	other
mmu-miR-26a-5p-1-2-6-6-AAGGCT	96.22	0.49	0.43	1.15	0.2512	0.5381	non-significant	mmu-miR-26a-5p-1-2	ambiguous tail	other
mmu-miR-26a-5p-1-2-7-7-GTAGGCT	112.89	0.5	0.37	1.36	0.1736	0.4356	non-significant	mmu-miR-26a-5p-1-2	ambiguous tail	other
mmu-miR-26a-5p-1-2-6-6-CAGGCT	92.44	0.36	0.34	1.04	0.2978	0.5867	non-significant	mmu-miR-26a-5p-1-2	ambiguous tail	other
mmu-miR-26a-5p-1-2-0-2-TC	84.98	0.68	0.33	2.06	0.0395	0.197	non-significant	mmu-miR-26a-5p-1-2	NT tail	other
mmu-miR-26a-5p-1-2-1-2-AT	104.24	0.71	0.46	1.55	0.1203	0.3614	non-significant	mmu-miR-26a-5p-1-2	ambiguous tail	AU
mmu-miR-26a-5p-1-2-0-3-ATT	140.75	-0.7	0.46	-1.53	0.1248	0.3704	non-significant	mmu-miR-26a-5p-1-2	NT tail	AUU
mmu-miR-26a-5p-1-2-2-2-AT	127.92	1.11	0.32	3.45	0.0006	0.0141	significant	mmu-miR-26a-5p-1-2	ambiguous tail	AU
mmu-miR-26a-5p-1-2-2-2-TT	71.95	0.66	0.65	1.03	0.3052	0.5934	non-significant	mmu-miR-26a-5p-1-2	ambiguous tail	UU
mmu-miR-26a-5p-1-2-7-7-TTAGGCT	60.38	0.74	0.53	1.4	0.1604	0.418	non-significant	mmu-miR-26a-5p-1-2	ambiguous tail	other
mmu-miR-26a-5p-1-2-3-1-A	109.91	0.8	0.46	1.75	0.0794	0.2864	non-significant	mmu-miR-26a-5p-1-2	ambiguous tail	A
mmu-miR-26a-5p-1-2-2-2-AA	147.9	0.62	0.64	0.97	0.334	0.6186	non-significant	mmu-miR-26a-5p-1-2	ambiguous tail	AA
mmu-miR-26a-5p-1-2-8-8-TATAGGCT	89.4	1.2	0.46	2.62	0.0089	0.079	non-significant	mmu-miR-26a-5p-1-2	ambiguous tail	other
mmu-miR-26a-5p-1-2-0-2-AT	107.05	-0.04	0.5	-0.09	0.9301	0.9745	non-significant	mmu-miR-26a-5p-1-2	NT tail	AU
mmu-miR-26a-5p-1-2-9-9-TGATAGGCT	84.63	1.23	0.36	3.39	0.0007	0.0159	significant	mmu-miR-26a-5p-1-2	ambiguous tail	other
mmu-miR-26a-5p-1-2-4-4-TGCT	87.72	1.33	0.41	3.27	0.0011	0.0204	significant	mmu-miR-26a-5p-1-2	ambiguous tail	other
mmu-miR-26a-5p-1-2-0-2-TA	81.66	-0.17	0.6	-0.28	0.7801	0.9082	non-significant	mmu-miR-26a-5p-1-2	NT tail	UA
mmu-miR-26a-5p-1-2-1-3-ATT	37.44	0.39	0.45	0.87	0.3861	0.6673	non-significant	mmu-miR-26a-5p-1-2	ambiguous tail	AUU
mmu-miR-26a-5p-1-2-3-3-TCT	73.65	1.19	0.4	2.95	0.0031	0.0391	significant	mmu-miR-26a-5p-1-2	ambiguous tail	other
mmu-miR-26a-5p-1-2-3-3-ACT	37.54	0.24	0.44	0.56	0.578	0.8163	non-significant	mmu-miR-26a-5p-1-2	ambiguous tail	other
mmu-miR-26a-5p-1-2-0-1-G	65.68	1.03	0.42	2.47	0.0134	0.0999	non-significant	mmu-miR-26a-5p-1-2	NT tail	G
mmu-miR-26a-5p-1-2-1-2-CT	23.97	-0.41	0.55	-0.76	0.4487	0.7287	non-significant	mmu-miR-26a-5p-1-2	ambiguous tail	other
mmu-miR-26a-5p-1-2-2-3-AAA	41.56	-0.32	1.07	-0.3	0.7676	0.9079	non-significant	mmu-miR-26a-5p-1-2	ambiguous tail	AAA
mmu-miR-26a-5p-1-2-1-2-AA	29.25	-1.04	0.94	-1.11	0.2686	0.5567	non-significant	mmu-miR-26a-5p-1-2	ambiguous tail	AA
mmu-miR-26a-5p-1-2-8-8-AATAGGCT	17.57	0.32	0.63	0.52	0.6057	0.8361	non-significant	mmu-miR-26a-5p-1-2	ambiguous tail	other
mmu-miR-26a-5p-1-2-9-9-AGATAGGCT	21.52	-0.12	0.56	-0.22	0.8247	0.9324	non-significant	mmu-miR-26a-5p-1-2	ambiguous tail	other
mmu-miR-26a-5p-1-2-9-9-CGATAGGCT	21.82	0.72	0.57	1.27	0.2024	0.4734	non-significant	mmu-miR-26a-5p-1-2	ambiguous tail	other
mmu-miR-26a-5p-1-2-2-2-AG	39.25	1.75	0.65	2.7	0.007	0.0659	non-significant	mmu-miR-26a-5p-1-2	ambiguous tail	other
mmu-miR-26a-5p-1-2-3-3-CCT	15.55	-0.15	1.14	-0.13	0.897		non-significant	mmu-miR-26a-5p-1-2	ambiguous tail	other
mmu-miR-26a-5p-1-2-8-8-CATAGGCT	23.88	1.46	0.93	1.56	0.1184	0.3601	non-significant	mmu-miR-26a-5p-1-2	ambiguous tail	other
mmu-miR-26a-5p-1-2-0-3-CTT	20.01	1.11	0.56	1.97	0.0487	0.2229	non-significant	mmu-miR-26a-5p-1-2	NT tail	other
mmu-miR-26a-5p-1-2-5-5-CGGCT	12.4	0.78	1.16	0.68	0.4991		non-significant	mmu-miR-26a-5p-1-2	ambiguous tail	other
mmu-miR-26a-5p-1-2-0-2-AA	14.76	-3.46	2.18	-1.58	0.1133		non-significant	mmu-miR-26a-5p-1-2	NT tail	AA
mmu-miR-26a-2-3p-0-0--	10.01	-0.2	0.81	-0.24	0.8066		non-significant	mmu-miR-26a-2-3p	canonical	other
mmu-miR-677-5p-0-2-CT	52.43	1.56	0.4	3.94	0.0001	0.0036	significant	mmu-miR-677-5p	ambiguous tail	other
mmu-miR-6914-3p-0-2-TT	9.05	0.79	0.93	0.84	0.399		non-significant	mmu-miR-6914-3p	NT tail	UU
mmu-miR-6914-3p-0-3-TTT	4.72	0.73	1.3	0.56	0.5735		non-significant	mmu-miR-6914-3p	NT tail	UUU
mmu-miR-1933-3p-0-0--	9.36	0.16	0.79	0.2	0.8414		non-significant	mmu-miR-1933-3p	canonical	other
mmu-miR-218-5p-1-2-0-0--	5705.53	0.98	0.44	2.22	0.0263	0.1524	non-significant	mmu-miR-218-5p-1-2	canonical	other
mmu-miR-218-5p-1-2-1-0--	1973.16	1.28	0.41	3.15	0.0016	0.0259	significant	mmu-miR-218-5p-1-2	trimmed	other
mmu-miR-218-5p-1-2-0-3-GGT	1455.57	0.67	0.23	2.88	0.004	0.0465	non-significant	mmu-miR-218-5p-1-2	NT tail	other
mmu-miR-218-5p-1-2-0-1-G	1564.43	1.16	0.4	2.93	0.0034	0.0415	significant	mmu-miR-218-5p-1-2	NT tail	G
mmu-miR-218-5p-1-2-0-2-GT	699.82	0.68	0.33	2.08	0.0376	0.1925	non-significant	mmu-miR-218-5p-1-2	NT tail	other
mmu-miR-218-5p-1-2-0-2-GG	490.46	1	0.43	2.33	0.02	0.132	non-significant	mmu-miR-218-5p-1-2	NT tail	other
mmu-miR-218-5p-1-2-0-2-GA	81.8	-0.2	0.5	-0.41	0.6817	0.8746	non-significant	mmu-miR-218-5p-1-2	NT tail	other
mmu-miR-218-5p-1-2-0-3-GAT	102.54	0.37	0.41	0.9	0.3706	0.6528	non-significant	mmu-miR-218-5p-1-2	NT tail	other
mmu-miR-218-5p-1-2-0-1-A	102.31	0.22	0.54	0.41	0.6784	0.874	non-significant	mmu-miR-218-5p-1-2	NT tail	A
mmu-miR-218-5p-1-2-0-1-T	25.94	1.26	0.68	1.84	0.0661	0.2624	non-significant	mmu-miR-218-5p-1-2	NT tail	U
mmu-miR-218-5p-1-2-0-3-GGA	26.97	0.99	0.5	1.98	0.0482	0.2229	non-significant	mmu-miR-218-5p-1-2	NT tail	other
mmu-miR-218-5p-1-2-3-0--	33.23	1.29	0.56	2.29	0.022	0.1379	non-significant	mmu-miR-218-5p-1-2	trimmed	other
mmu-miR-218-5p-1-2-1-1-G	26.44	1.95	0.95	2.05	0.0404	0.1995	non-significant	mmu-miR-218-5p-1-2	ambiguous tail	G
mmu-miR-218-2-3p-0-1-T	9.59	-2.06	0.9	-2.29	0.0222		non-significant	mmu-miR-218-2-3p	NT tail	U
mmu-miR-218-2-3p-0-0--	1.75	-2.88	1.95	-1.48	0.139		non-significant	mmu-miR-218-2-3p	canonical	other
mmu-miR-340-5p-0-0--	3585.61	0.77	0.36	2.13	0.0334	0.1784	non-significant	mmu-miR-340-5p	canonical	other
mmu-miR-340-5p-1-0--	921.19	0.93	0.33	2.8	0.0051	0.0545	non-significant	mmu-miR-340-5p	trimmed	other
mmu-miR-340-5p-2-0--	54.48	0.72	0.6	1.2	0.2309	0.5112	non-significant	mmu-miR-340-5p	trimmed	other
mmu-miR-340-5p-1-1-A	15.4	0.13	0.78	0.17	0.8634		non-significant	mmu-miR-340-5p	ambiguous tail	A
mmu-miR-340-5p-0-1-T	13.26	0.99	0.65	1.53	0.1272		non-significant	mmu-miR-340-5p	NT tail	U
mmu-miR-340-3p-0-1-C	124.14	0.35	0.34	1.04	0.2966	0.5853	non-significant	mmu-miR-340-3p	ambiguous tail	C
mmu-miR-340-3p-0-2-CT	128.72	0.19	0.33	0.58	0.5592	0.808	non-significant	mmu-miR-340-3p	NT tail	other
mmu-miR-340-3p-0-0--	98.54	0.41	0.32	1.29	0.1977	0.4698	non-significant	mmu-miR-340-3p	canonical	other
mmu-miR-340-3p-0-1-T	4.1	0.25	1.36	0.18	0.855		non-significant	mmu-miR-340-3p	NT tail	U
mmu-miR-340-3p-0-2-CG	7.09	1.85	1.01	1.84	0.0654		non-significant	mmu-miR-340-3p	NT tail	other
mmu-miR-3061-5p-1-0--	24.47	0.14	0.55	0.25	0.8011	0.9197	non-significant	mmu-miR-3061-5p	trimmed	other
mmu-miR-3061-5p-0-1-T	6.45	0.64	1.04	0.61	0.5405		non-significant	mmu-miR-3061-5p	ambiguous tail	U
mmu-miR-3061-3p-0-0--	39.67	0.21	0.53	0.4	0.6924	0.8812	non-significant	mmu-miR-3061-3p	canonical	other
mmu-miR-3061-3p-0-1-T	24.78	0.37	0.51	0.72	0.4692	0.7429	non-significant	mmu-miR-3061-3p	NT tail	U
mmu-miR-3061-3p-1-0--	8.6	0.57	0.81	0.7	0.4812		non-significant	mmu-miR-3061-3p	trimmed	other
mmu-miR-3061-3p-0-1-A	2.27	-2.67	2.33	-1.15	0.2521		non-significant	mmu-miR-3061-3p	NT tail	A
mmu-miR-5100-1-2-CA	9.67	-0.52	0.9	-0.58	0.5597		non-significant	mmu-miR-5100	ambiguous tail	other
mmu-miR-744-3p-0-0--	64.97	-0.34	0.34	-1.01	0.3118	0.5982	non-significant	mmu-miR-744-3p	canonical	other
mmu-miR-744-3p-1-0--	5.41	-1.59	1.35	-1.18	0.2387		non-significant	mmu-miR-744-3p	trimmed	other
mmu-miR-744-3p-2-1-T	6.58	0.12	1.09	0.11	0.9118		non-significant	mmu-miR-744-3p	ambiguous tail	U
mmu-miR-744-3p-1-1-G	1.67	0.78	1.73	0.45	0.6502		non-significant	mmu-miR-744-3p	ambiguous tail	G
mmu-miR-744-5p-1-0--	6115.77	0.04	0.37	0.1	0.9167	0.9734	non-significant	mmu-miR-744-5p	trimmed	other
mmu-miR-744-5p-0-0--	1469.61	-0.63	0.24	-2.68	0.0073	0.0674	non-significant	mmu-miR-744-5p	canonical	other
mmu-miR-744-5p-1-1-T	292.36	-0.24	0.33	-0.73	0.4677	0.7429	non-significant	mmu-miR-744-5p	ambiguous tail	U
mmu-miR-744-5p-2-1-T	199.86	-0.73	0.33	-2.23	0.026	0.1524	non-significant	mmu-miR-744-5p	ambiguous tail	U
mmu-miR-744-5p-1-2-TT	211.99	0.1	0.44	0.22	0.822	0.9316	non-significant	mmu-miR-744-5p	ambiguous tail	UU
mmu-miR-744-5p-2-0--	95.09	-0.29	0.35	-0.82	0.4127	0.6969	non-significant	mmu-miR-744-5p	trimmed	other
mmu-miR-744-5p-2-1-A	87.92	-1.21	0.48	-2.5	0.0123	0.0957	non-significant	mmu-miR-744-5p	ambiguous tail	A
mmu-miR-744-5p-0-1-T	38.47	-0.47	0.42	-1.13	0.2571	0.5441	non-significant	mmu-miR-744-5p	NT tail	U
mmu-miR-744-5p-3-0--	30.77	-0.54	0.46	-1.19	0.233	0.5147	non-significant	mmu-miR-744-5p	trimmed	other
mmu-miR-744-5p-0-2-CT	30	-0.64	0.52	-1.22	0.2229	0.4992	non-significant	mmu-miR-744-5p	NT tail	other
mmu-miR-744-5p-0-2-TT	19.85	-2.03	0.92	-2.19	0.0282	0.1572	non-significant	mmu-miR-744-5p	NT tail	UU
mmu-miR-744-5p-2-2-TT	20.53	0.66	0.6	1.11	0.2691	0.557	non-significant	mmu-miR-744-5p	ambiguous tail	UU
mmu-miR-744-5p-0-1-A	18.21	-4.81	1.44	-3.33	0.0009	0.0179	significant	mmu-miR-744-5p	NT tail	A
mmu-miR-744-5p-2-2-TA	6.25	-3.82	2.09	-1.83	0.0675		non-significant	mmu-miR-744-5p	ambiguous tail	UA
mmu-miR-744-5p-2-2-AA	19.86	-0.78	1.61	-0.48	0.6277	0.8499	non-significant	mmu-miR-744-5p	ambiguous tail	AA
mmu-miR-1934-5p-0-0--	4.26	0.34	1.23	0.27	0.7835		non-significant	mmu-miR-1934-5p	canonical	other
mmu-miR-324-5p-0-0--	924.16	-0.99	0.34	-2.91	0.0036	0.0431	non-significant	mmu-miR-324-5p	canonical	other
mmu-miR-324-5p-1-1-G	79.44	-0.16	0.44	-0.36	0.719	0.8949	non-significant	mmu-miR-324-5p	ambiguous tail	G
mmu-miR-324-5p-1-0--	61.75	0.09	0.33	0.28	0.7776	0.9082	non-significant	mmu-miR-324-5p	trimmed	other
mmu-miR-324-5p-2-0--	33.12	-0.93	0.44	-2.13	0.033	0.1777	non-significant	mmu-miR-324-5p	trimmed	other
mmu-miR-324-5p-2-1-A	14.61	0.13	0.75	0.18	0.8594		non-significant	mmu-miR-324-5p	ambiguous tail	A
mmu-miR-324-5p-3-0--	11.46	-0.57	0.77	-0.74	0.46		non-significant	mmu-miR-324-5p	trimmed	other
mmu-miR-324-5p-0-1-T	9.45	-1.31	0.78	-1.67	0.0944		non-significant	mmu-miR-324-5p	NT tail	U
mmu-miR-324-5p-1-1-A	15.8	-1.02	0.76	-1.34	0.1806		non-significant	mmu-miR-324-5p	ambiguous tail	A
mmu-miR-324-3p-0-1-G	109.66	-0.29	0.49	-0.59	0.5559	0.8048	non-significant	mmu-miR-324-3p	ambiguous tail	G
mmu-miR-324-3p-0-0--	26.39	-1.02	0.72	-1.42	0.1564	0.4129	non-significant	mmu-miR-324-3p	canonical	other
mmu-miR-324-3p-0-2-GT	18.66	-0.66	0.59	-1.12	0.2642	0.5507	non-significant	mmu-miR-324-3p	NT tail	other
mmu-miR-324-3p-2-0--	12.21	0.33	0.87	0.38	0.7043		non-significant	mmu-miR-324-3p	trimmed	other
mmu-miR-324-3p-0-2-GG	10.27	-0.42	0.76	-0.55	0.5815		non-significant	mmu-miR-324-3p	ambiguous tail	other
mmu-miR-497a-5p-0-0--	253.4	-0.14	0.25	-0.56	0.5772	0.8163	non-significant	mmu-miR-497a-5p	canonical	other
mmu-miR-497a-5p-1-0--	129.24	-0.24	0.35	-0.7	0.4859	0.749	non-significant	mmu-miR-497a-5p	trimmed	other
mmu-miR-497a-5p-1-1-T	14.56	0.5	0.67	0.75	0.4563		non-significant	mmu-miR-497a-5p	ambiguous tail	U
mmu-miR-497a-5p-2-0--	11.53	0.23	0.71	0.32	0.7499		non-significant	mmu-miR-497a-5p	trimmed	other
mmu-miR-497a-5p-0-1-T	2.74	-0.55	1.69	-0.32	0.7458		non-significant	mmu-miR-497a-5p	NT tail	U
mmu-miR-497a-5p-0-1-C	5	-0.28	0.99	-0.28	0.7785		non-significant	mmu-miR-497a-5p	ambiguous tail	C
mmu-miR-195a-3p-0-2-AT	18.5	0.04	0.67	0.06	0.9558	0.9834	non-significant	mmu-miR-195a-3p	NT tail	AU
mmu-miR-195a-3p-0-3-ATT	13.72	0.35	0.73	0.48	0.6295		non-significant	mmu-miR-195a-3p	NT tail	AUU
mmu-miR-195a-3p-0-1-A	6.73	0.52	0.91	0.57	0.5689		non-significant	mmu-miR-195a-3p	ambiguous tail	A
mmu-miR-195a-3p-0-1-T	6.31	0.63	0.94	0.67	0.5022		non-significant	mmu-miR-195a-3p	NT tail	U
mmu-miR-195a-3p-0-0--	14.11	0.14	0.82	0.17	0.8635		non-significant	mmu-miR-195a-3p	canonical	other
mmu-miR-195a-3p-2-0--	3.27	-0.03	1.25	-0.02	0.9834		non-significant	mmu-miR-195a-3p	trimmed	other
mmu-miR-212-5p-0-0--	2525.54	0.05	0.22	0.21	0.8352	0.9333	non-significant	mmu-miR-212-5p	canonical	other
mmu-miR-212-5p-0-1-G	375.92	0.31	0.3	1.03	0.3012	0.5903	non-significant	mmu-miR-212-5p	ambiguous tail	G
mmu-miR-212-5p-1-0--	74.36	0.96	0.42	2.29	0.0218	0.1379	non-significant	mmu-miR-212-5p	trimmed	other
mmu-miR-212-5p-0-2-GT	48.42	0.11	0.52	0.22	0.8277	0.9333	non-significant	mmu-miR-212-5p	NT tail	other
mmu-miR-212-3p-1-0--	1493.71	0.15	0.33	0.45	0.6518	0.8622	non-significant	mmu-miR-212-3p	trimmed	other
mmu-miR-212-3p-2-0--	529.2	0.08	0.27	0.28	0.7815	0.9082	non-significant	mmu-miR-212-3p	trimmed	other
mmu-miR-212-3p-0-1-C	310.82	-0.62	0.42	-1.47	0.142	0.3897	non-significant	mmu-miR-212-3p	ambiguous tail	C
mmu-miR-212-3p-0-2-CT	223.31	-0.58	0.33	-1.77	0.0775	0.2831	non-significant	mmu-miR-212-3p	NT tail	other
mmu-miR-212-3p-0-0--	140.4	-0.49	0.28	-1.76	0.0787	0.2852	non-significant	mmu-miR-212-3p	canonical	other
mmu-miR-212-3p-1-1-T	117.45	0.43	0.4	1.07	0.286	0.5738	non-significant	mmu-miR-212-3p	ambiguous tail	U
mmu-miR-212-3p-0-1-T	36.63	-0.08	0.46	-0.17	0.8669	0.9492	non-significant	mmu-miR-212-3p	NT tail	U
mmu-miR-212-3p-0-2-TT	60.75	-0.1	0.5	-0.21	0.8348	0.9333	non-significant	mmu-miR-212-3p	NT tail	UU
mmu-miR-212-3p-2-1-T	33.93	-0.01	0.46	-0.03	0.9749	0.9878	non-significant	mmu-miR-212-3p	ambiguous tail	U
mmu-miR-212-3p-3-0--	31.67	2.04	0.47	4.34	0	0.0012	significant	mmu-miR-212-3p	trimmed	other
mmu-miR-212-3p-0-3-TTT	12.33	-2.3	1.04	-2.2	0.0275		non-significant	mmu-miR-212-3p	NT tail	UUU
mmu-miR-212-3p-2-1-A	18.76	-0.83	0.58	-1.43	0.1523	0.407	non-significant	mmu-miR-212-3p	ambiguous tail	A
mmu-miR-132-5p-2-0--	56.87	-0.15	0.43	-0.35	0.7266	0.8973	non-significant	mmu-miR-132-5p	trimmed	other
mmu-miR-132-5p-3-0--	34.72	-0.05	0.62	-0.09	0.9311	0.9745	non-significant	mmu-miR-132-5p	trimmed	other
mmu-miR-132-5p-1-0--	20.62	0.34	0.57	0.6	0.5495	0.8024	non-significant	mmu-miR-132-5p	trimmed	other
mmu-miR-132-5p-0-0--	23.02	0.2	0.54	0.37	0.7123	0.8906	non-significant	mmu-miR-132-5p	canonical	other
mmu-miR-132-5p-0-1-T	6.16	-0.51	0.9	-0.56	0.5729		non-significant	mmu-miR-132-5p	ambiguous tail	U
mmu-miR-132-3p-1-0--	2765.41	0.13	0.17	0.78	0.4355	0.72	non-significant	mmu-miR-132-3p	trimmed	other
mmu-miR-132-3p-0-0--	2003.92	0.48	0.28	1.7	0.0883	0.3046	non-significant	mmu-miR-132-3p	canonical	other
mmu-miR-132-3p-0-1-T	861.25	-0.04	0.34	-0.12	0.9074	0.9694	non-significant	mmu-miR-132-3p	NT tail	U
mmu-miR-132-3p-2-0--	105.61	0.91	0.4	2.29	0.0218	0.1379	non-significant	mmu-miR-132-3p	trimmed	other
mmu-miR-132-3p-1-1-T	51.77	0.17	0.39	0.43	0.6657	0.8681	non-significant	mmu-miR-132-3p	ambiguous tail	U
mmu-miR-132-3p-0-2-TT	45.74	0.18	0.38	0.46	0.6456	0.8606	non-significant	mmu-miR-132-3p	NT tail	UU
mmu-miR-132-3p-2-1-A	54.55	-0.22	0.45	-0.49	0.6243	0.847	non-significant	mmu-miR-132-3p	ambiguous tail	A
mmu-miR-132-3p-0-1-C	58.09	-0.22	0.51	-0.44	0.6571	0.864	non-significant	mmu-miR-132-3p	ambiguous tail	C
mmu-miR-132-3p-3-0--	21.86	1.06	0.64	1.67	0.0957	0.3188	non-significant	mmu-miR-132-3p	trimmed	other
mmu-miR-132-3p-0-1-A	31.7	-0.1	1.02	-0.09	0.9251	0.9745	non-significant	mmu-miR-132-3p	NT tail	A
mmu-miR-22-5p-1-0--	36.83	-0.04	0.65	-0.07	0.9481	0.9804	non-significant	mmu-miR-22-5p	trimmed	other
mmu-miR-22-5p-2-0--	28.69	0.02	0.51	0.04	0.9677	0.985	non-significant	mmu-miR-22-5p	trimmed	other
mmu-miR-22-5p-3-0--	2.82	-0.64	1.51	-0.42	0.6709		non-significant	mmu-miR-22-5p	trimmed	other
mmu-miR-22-3p-0-0--	73141.6	0.5	0.15	3.25	0.0011	0.0205	non-significant	mmu-miR-22-3p	canonical	other
mmu-miR-22-3p-2-0--	802.93	0.27	0.29	0.92	0.3598	0.6415	non-significant	mmu-miR-22-3p	trimmed	other
mmu-miR-22-3p-1-0--	727.81	0.84	0.28	3.02	0.0025	0.0338	non-significant	mmu-miR-22-3p	trimmed	other
mmu-miR-22-3p-1-1-G	371.19	1.38	0.24	5.76	0	0	significant	mmu-miR-22-3p	ambiguous tail	G
mmu-miR-22-3p-3-0--	391.75	1.38	0.54	2.58	0.0099	0.0835	non-significant	mmu-miR-22-3p	trimmed	other
mmu-miR-22-3p-0-1-T	79.37	0.4	0.3	1.33	0.1822	0.4479	non-significant	mmu-miR-22-3p	ambiguous tail	U
mmu-miR-22-3p-0-1-A	74.01	-0.12	0.58	-0.21	0.8345	0.9333	non-significant	mmu-miR-22-3p	NT tail	A
mmu-miR-22-3p-1-1-C	56.88	0.71	0.44	1.59	0.1124	0.3496	non-significant	mmu-miR-22-3p	ambiguous tail	C
mmu-miR-22-3p-1-1-A	46.49	0.29	0.55	0.52	0.6013	0.8324	non-significant	mmu-miR-22-3p	ambiguous tail	A
mmu-miR-22-3p-9-9-GAGAACTGT	19.92	0.18	0.58	0.31	0.759	0.9079	non-significant	mmu-miR-22-3p	ambiguous tail	other
mmu-miR-22-3p-8-8-GGAACTGT	29.54	0.31	0.55	0.57	0.572	0.8158	non-significant	mmu-miR-22-3p	ambiguous tail	other
mmu-miR-22-3p-7-7-TAACTGT	16.63	1	1.03	0.97	0.3303		non-significant	mmu-miR-22-3p	ambiguous tail	other
mmu-miR-423-3p-0-0--	1675.27	-0.61	0.56	-1.09	0.2751	0.5611	non-significant	mmu-miR-423-3p	canonical	other
mmu-miR-423-3p-0-1-T	575.54	-0.79	0.58	-1.37	0.1712	0.4342	non-significant	mmu-miR-423-3p	NT tail	U
mmu-miR-423-3p-1-0--	77.26	-0.3	0.6	-0.5	0.6204	0.8447	non-significant	mmu-miR-423-3p	trimmed	other
mmu-miR-423-3p-0-1-A	66.23	-0.98	1.02	-0.96	0.3386	0.6223	non-significant	mmu-miR-423-3p	NT tail	A
mmu-miR-423-3p-2-0--	17.51	-0.44	0.71	-0.62	0.5362	0.7917	non-significant	mmu-miR-423-3p	trimmed	other
mmu-miR-423-3p-0-2-TT	18.48	-0.54	0.97	-0.56	0.5772	0.8163	non-significant	mmu-miR-423-3p	NT tail	UU
mmu-miR-423-3p-3-1-T	8.31	-0.29	1.07	-0.27	0.785		non-significant	mmu-miR-423-3p	ambiguous tail	U
mmu-miR-423-3p-0-3-ATT	6.92	-0.73	1.42	-0.52	0.6054		non-significant	mmu-miR-423-3p	NT tail	AUU
mmu-miR-423-5p-0-0--	2057.21	0.21	0.52	0.4	0.6857	0.876	non-significant	mmu-miR-423-5p	canonical	other
mmu-miR-423-5p-1-0--	313.86	0.23	0.52	0.44	0.6583	0.8645	non-significant	mmu-miR-423-5p	trimmed	other
mmu-miR-423-5p-2-0--	210.13	-0.28	0.48	-0.59	0.5551	0.8047	non-significant	mmu-miR-423-5p	trimmed	other
mmu-miR-423-5p-0-1-T	178.74	0.23	0.63	0.36	0.7172	0.8938	non-significant	mmu-miR-423-5p	NT tail	U
mmu-miR-423-5p-0-2-TT	50.36	0.97	0.72	1.35	0.1775	0.4398	non-significant	mmu-miR-423-5p	NT tail	UU
mmu-miR-423-5p-0-3-TTT	17.22	0.22	0.76	0.29	0.7699		non-significant	mmu-miR-423-5p	NT tail	UUU
mmu-miR-423-5p-3-0--	14.09	0.61	0.97	0.63	0.5277		non-significant	mmu-miR-423-5p	trimmed	other
mmu-miR-144-5p-0-0--	27.12	0.3	0.88	0.34	0.7324	0.8989	non-significant	mmu-miR-144-5p	canonical	other
mmu-miR-144-5p-1-0--	17.57	0.71	1.03	0.69	0.4923	0.7548	non-significant	mmu-miR-144-5p	trimmed	other
mmu-miR-144-3p-0-0--	12.04	-0.25	1.07	-0.23	0.8171		non-significant	mmu-miR-144-3p	canonical	other
mmu-miR-144-3p-2-0--	20.36	0.81	0.8	1.01	0.3123	0.5982	non-significant	mmu-miR-144-3p	trimmed	other
mmu-miR-144-3p-1-0--	20.32	0.04	0.82	0.05	0.9572	0.9834	non-significant	mmu-miR-144-3p	trimmed	other
mmu-miR-451a-0-1-T	362.33	-0.5	0.53	-0.95	0.3441	0.627	non-significant	mmu-miR-451a	ambiguous tail	U
mmu-miR-451a-1-0--	271.29	-0.35	0.51	-0.69	0.4929	0.755	non-significant	mmu-miR-451a	trimmed	other
mmu-miR-451a-0-0--	167.51	-0.53	0.73	-0.73	0.4676	0.7429	non-significant	mmu-miR-451a	canonical	other
mmu-miR-451a-0-2-TA	18.37	-1.4	0.79	-1.78	0.0748	0.2781	non-significant	mmu-miR-451a	ambiguous tail	UA
mmu-miR-451a-0-3-TAG	20.08	-1.05	0.83	-1.27	0.2033	0.4737	non-significant	mmu-miR-451a	ambiguous tail	other
mmu-miR-451a-2-0--	11.31	-1.02	1.04	-0.98	0.3265		non-significant	mmu-miR-451a	trimmed	other
mmu-miR-451a-3-0--	7.61	-0.89	1.1	-0.81	0.4195		non-significant	mmu-miR-451a	trimmed	other
mmu-miR-7653-3p-0-0--	16.17	-0.63	0.96	-0.66	0.512		non-significant	mmu-miR-7653-3p	canonical	other
mmu-miR-193a-5p-0-0--	3.12	-3.03	1.61	-1.88	0.0597		non-significant	mmu-miR-193a-5p	canonical	other
mmu-miR-365-3p-1-2-0-0--	225.21	-0.98	0.45	-2.19	0.0282	0.1572	non-significant	mmu-miR-365-3p-1-2	canonical	other
mmu-miR-365-3p-1-2-0-1-T	60.9	-0.97	0.43	-2.25	0.0244	0.146	non-significant	mmu-miR-365-3p-1-2	NT tail	U
mmu-miR-365-3p-1-2-1-1-C	17.93	-0.78	0.81	-0.96	0.335	0.6191	non-significant	mmu-miR-365-3p-1-2	ambiguous tail	C
mmu-miR-365-3p-1-2-1-0--	6.19	-1.28	1.09	-1.18	0.238		non-significant	mmu-miR-365-3p-1-2	trimmed	other
mmu-miR-365-3p-1-2-2-2-TT	7.37	-0.47	1.06	-0.45	0.6551		non-significant	mmu-miR-365-3p-1-2	ambiguous tail	UU
mmu-miR-365-3p-1-2-2-0--	11.3	0.03	0.82	0.04	0.971		non-significant	mmu-miR-365-3p-1-2	trimmed	other
mmu-miR-21a-3p-1-0--	77.09	0.04	0.42	0.08	0.9329	0.9745	non-significant	mmu-miR-21a-3p	trimmed	other
mmu-miR-301a-3p-0-0--	421.4	0.78	0.39	2.02	0.0438	0.2091	non-significant	mmu-miR-301a-3p	canonical	other
mmu-miR-301a-3p-0-3-ATT	25.17	0.54	0.8	0.67	0.4998	0.7594	non-significant	mmu-miR-301a-3p	NT tail	AUU
mmu-miR-301a-3p-0-1-T	32.75	0.12	0.47	0.25	0.8052	0.922	non-significant	mmu-miR-301a-3p	NT tail	U
mmu-miR-301a-3p-1-0--	7.68	0.75	0.93	0.81	0.4176		non-significant	mmu-miR-301a-3p	trimmed	other
mmu-miR-301a-3p-0-2-AT	2.25	-0.03	1.64	-0.02	0.9861		non-significant	mmu-miR-301a-3p	ambiguous tail	AU
mmu-miR-142a-5p-0-0--	170.13	-0.55	0.3	-1.87	0.061	0.2545	non-significant	mmu-miR-142a-5p	canonical	other
mmu-miR-142a-5p-1-0--	10.18	-1.87	1.07	-1.75	0.0801		non-significant	mmu-miR-142a-5p	trimmed	other
mmu-miR-142a-5p-3-0--	20.81	0.97	0.56	1.72	0.0861	0.3005	non-significant	mmu-miR-142a-5p	trimmed	other
mmu-miR-142a-5p-2-0--	13.41	0.47	0.77	0.62	0.5353		non-significant	mmu-miR-142a-5p	trimmed	other
mmu-miR-10a-5p-1-0--	683.48	-0.11	0.5	-0.22	0.8239	0.9321	non-significant	mmu-miR-10a-5p	trimmed	other
mmu-miR-10a-5p-0-1-T	37.96	-0.14	0.62	-0.22	0.8233	0.9321	non-significant	mmu-miR-10a-5p	ambiguous tail	U
mmu-miR-10a-5p-0-0--	28.31	0.3	0.68	0.45	0.6545	0.8632	non-significant	mmu-miR-10a-5p	canonical	other
mmu-miR-10a-5p-2-0--	13.63	-1	0.98	-1.02	0.3086		non-significant	mmu-miR-10a-5p	trimmed	other
mmu-miR-10a-5p-0-1-A	19.67	-0.57	0.85	-0.66	0.5076	0.7666	non-significant	mmu-miR-10a-5p	NT tail	A
mmu-miR-10a-5p-0-1-G	10.09	0.87	0.85	1.03	0.3033		non-significant	mmu-miR-10a-5p	NT tail	G
mmu-miR-152-5p-0-0--	83.97	-1.08	0.32	-3.41	0.0006	0.0154	significant	mmu-miR-152-5p	canonical	other
mmu-miR-152-3p-0-0--	33.97	0.46	0.9	0.51	0.6109	0.8386	non-significant	mmu-miR-152-3p	canonical	other
mmu-miR-152-3p-0-2-TA	45.83	0.51	0.53	0.96	0.3377	0.6217	non-significant	mmu-miR-152-3p	NT tail	UA
mmu-miR-152-3p-0-2-TT	20.17	0.8	0.64	1.26	0.2094	0.4821	non-significant	mmu-miR-152-3p	NT tail	UU
mmu-miR-152-3p-0-1-T	22.2	1.28	0.71	1.79	0.0735	0.2771	non-significant	mmu-miR-152-3p	NT tail	U
mmu-miR-152-3p-0-1-A	7.99	0.03	1.04	0.03	0.9789		non-significant	mmu-miR-152-3p	NT tail	A
mmu-miR-152-3p-0-2-GT	5.25	-0.41	1.13	-0.36	0.7187		non-significant	mmu-miR-152-3p	NT tail	other
mmu-miR-152-3p-3-0--	5.75	1.76	1.22	1.45	0.1481		non-significant	mmu-miR-152-3p	trimmed	other
mmu-miR-152-3p-0-1-G	7.05	1.02	0.93	1.09	0.2746		non-significant	mmu-miR-152-3p	ambiguous tail	G
mmu-miR-152-3p-0-2-GA	6.09	0.69	1	0.68	0.4941		non-significant	mmu-miR-152-3p	NT tail	other
mmu-miR-152-3p-0-3-GAA	3.52	1.04	1.55	0.67	0.5018		non-significant	mmu-miR-152-3p	NT tail	other
mmu-miR-152-3p-0-1-C	1.5	-0.75	2.21	-0.34	0.7351		non-significant	mmu-miR-152-3p	NT tail	C
mmu-miR-8103-0-1-T	6.71	-0.48	1.17	-0.41	0.6798		non-significant	mmu-miR-8103	ambiguous tail	U
mmu-miR-8103-1-1-T	2.33	-0.07	1.48	-0.05	0.9616		non-significant	mmu-miR-8103	ambiguous tail	U
mmu-miR-7235-3p-1-0--	6.7	-0.45	0.89	-0.51	0.6107		non-significant	mmu-miR-7235-3p	trimmed	other
mmu-miR-6932-3p-0-2-TT	3.09	-1.36	1.45	-0.94	0.3459		non-significant	mmu-miR-6932-3p	NT tail	UU
mmu-miR-5621-3p-0-1-T	10.58	-0.72	0.91	-0.79	0.4271		non-significant	mmu-miR-5621-3p	ambiguous tail	U
mmu-miR-5621-3p-0-0--	3.64	-2.28	1.51	-1.51	0.1312		non-significant	mmu-miR-5621-3p	canonical	other
mmu-miR-6516-5p-0-2-TC	62.96	0.76	0.43	1.78	0.0755	0.2782	non-significant	mmu-miR-6516-5p	ambiguous tail	other
mmu-miR-6516-5p-0-3-TCC	21.37	0.12	0.53	0.23	0.8175	0.9276	non-significant	mmu-miR-6516-5p	ambiguous tail	other
mmu-miR-6516-5p-1-1-T	1.62	0.43	1.72	0.25	0.8005		non-significant	mmu-miR-6516-5p	ambiguous tail	U
mmu-miR-6516-5p-0-1-T	1.51	0.75	2.56	0.29	0.7708		non-significant	mmu-miR-6516-5p	ambiguous tail	U
mmu-miR-338-3p-1-0--	8385.43	1.09	0.31	3.48	0.0005	0.0134	significant	mmu-miR-338-3p	trimmed	other
mmu-miR-338-3p-0-1-A	115.36	0.55	0.46	1.17	0.2403	0.5241	non-significant	mmu-miR-338-3p	NT tail	A
mmu-miR-338-3p-2-0--	254.57	1.09	0.36	3	0.0027	0.0354	significant	mmu-miR-338-3p	trimmed	other
mmu-miR-338-3p-0-0--	79.61	0.81	0.39	2.08	0.0377	0.1925	non-significant	mmu-miR-338-3p	canonical	other
mmu-miR-338-3p-3-0--	46.85	1.82	0.73	2.48	0.013	0.0985	non-significant	mmu-miR-338-3p	trimmed	other
mmu-miR-338-3p-2-1-A	13.6	0.21	1.53	0.14	0.8903		non-significant	mmu-miR-338-3p	ambiguous tail	A
mmu-miR-338-5p-1-0--	515.46	0.88	0.31	2.86	0.0042	0.0474	non-significant	mmu-miR-338-5p	trimmed	other
mmu-miR-338-5p-0-1-G	24.7	0.77	0.67	1.14	0.2524	0.5382	non-significant	mmu-miR-338-5p	NT tail	G
mmu-miR-338-5p-2-0--	18	1.05	0.61	1.73	0.0837	0.2968	non-significant	mmu-miR-338-5p	trimmed	other
mmu-miR-338-5p-0-1-T	9.1	0.28	1.07	0.26	0.7929		non-significant	mmu-miR-338-5p	NT tail	U
mmu-miR-338-5p-0-0--	10.26	0.67	0.86	0.79	0.432		non-significant	mmu-miR-338-5p	canonical	other
mmu-miR-7236-3p-0-0--	25.43	0.26	0.77	0.34	0.7349	0.8989	non-significant	mmu-miR-7236-3p	canonical	other
mmu-miR-7236-3p-1-0--	3.99	0.48	1.22	0.39	0.6936		non-significant	mmu-miR-7236-3p	trimmed	other
mmu-miR-3066-5p-0-1-T	5.5	2.55	1.49	1.71	0.0879		non-significant	mmu-miR-3066-5p	ambiguous tail	U
mmu-miR-6538-1-0--	22.16	0.08	0.89	0.09	0.9244	0.9745	non-significant	mmu-miR-6538	trimmed	other
mmu-miR-6538-0-1-G	3.78	-1.64	1.35	-1.22	0.2233		non-significant	mmu-miR-6538	NT tail	G
mmu-miR-1843a-3p-0-0--	25.3	0.3	0.81	0.37	0.7093	0.8874	non-significant	mmu-miR-1843a-3p	canonical	other
mmu-miR-1843a-3p-1-0--	15.16	0.6	0.61	0.98	0.3279		non-significant	mmu-miR-1843a-3p	trimmed	other
mmu-miR-1843a-3p-1-1-T	9.1	-1.03	0.83	-1.24	0.216		non-significant	mmu-miR-1843a-3p	ambiguous tail	U
mmu-miR-1843a-3p-0-2-AC	2.47	-1.64	2.46	-0.67	0.5042		non-significant	mmu-miR-1843a-3p	NT tail	other
mmu-miR-1843a-3p-0-1-A	2.71	0.34	1.32	0.26	0.795		non-significant	mmu-miR-1843a-3p	NT tail	A
mmu-miR-1843a-3p-2-0--	2.39	0.02	1.65	0.01	0.9903		non-significant	mmu-miR-1843a-3p	trimmed	other
mmu-miR-1843a-5p-0-1-T	1411.14	0.56	0.25	2.2	0.0278	0.1572	non-significant	mmu-miR-1843a-5p	NT tail	U
mmu-miR-1843a-5p-0-0--	876.41	0.48	0.3	1.62	0.1061	0.34	non-significant	mmu-miR-1843a-5p	canonical	other
mmu-miR-1843a-5p-1-1-A	45.71	0.81	0.42	1.91	0.056	0.2429	non-significant	mmu-miR-1843a-5p	ambiguous tail	A
mmu-miR-1843a-5p-1-0--	33.51	1.45	0.61	2.35	0.0186	0.126	non-significant	mmu-miR-1843a-5p	trimmed	other
mmu-miR-1843a-5p-0-3-TTT	25.53	0.25	0.52	0.48	0.6303	0.8506	non-significant	mmu-miR-1843a-5p	NT tail	UUU
mmu-miR-1843a-5p-0-2-TT	17.76	-0.54	0.82	-0.66	0.51	0.7683	non-significant	mmu-miR-1843a-5p	NT tail	UU
mmu-miR-3068-3p-0-0--	42.75	0.19	0.57	0.32	0.7452	0.9006	non-significant	mmu-miR-3068-3p	canonical	other
mmu-miR-3068-3p-1-0--	25.35	0.19	0.51	0.37	0.7147	0.8919	non-significant	mmu-miR-3068-3p	trimmed	other
mmu-miR-3068-3p-1-1-T	21.31	-0.26	0.63	-0.41	0.6787	0.874	non-significant	mmu-miR-3068-3p	ambiguous tail	U
mmu-miR-3068-3p-0-1-T	8	0.59	0.82	0.72	0.4717		non-significant	mmu-miR-3068-3p	NT tail	U
mmu-miR-3068-5p-0-0--	39.5	0.83	0.64	1.3	0.1921	0.4621	non-significant	mmu-miR-3068-5p	canonical	other
mmu-miR-3069-3p-1-1-T	24.41	0.17	0.69	0.25	0.7997	0.9197	non-significant	mmu-miR-3069-3p	ambiguous tail	U
mmu-miR-342-3p-0-0--	1280.28	-0.15	0.39	-0.39	0.6963	0.8834	non-significant	mmu-miR-342-3p	canonical	other
mmu-miR-342-3p-0-1-C	925.22	-0.21	0.48	-0.44	0.6599	0.8646	non-significant	mmu-miR-342-3p	ambiguous tail	C
mmu-miR-342-3p-1-0--	186.18	0.05	0.41	0.12	0.9077	0.9694	non-significant	mmu-miR-342-3p	trimmed	other
mmu-miR-342-3p-0-2-CA	122.1	-0.21	0.43	-0.48	0.6319	0.8506	non-significant	mmu-miR-342-3p	ambiguous tail	other
mmu-miR-342-3p-0-1-T	44.41	-0.51	0.54	-0.94	0.3475	0.6284	non-significant	mmu-miR-342-3p	NT tail	U
mmu-miR-342-3p-0-2-CT	38.65	-0.08	0.78	-0.1	0.9217	0.9745	non-significant	mmu-miR-342-3p	NT tail	other
mmu-miR-342-3p-2-0--	12.75	-0.82	0.78	-1.05	0.296		non-significant	mmu-miR-342-3p	trimmed	other
mmu-miR-342-3p-1-1-G	17.59	0.8	0.81	0.99	0.3243	0.6123	non-significant	mmu-miR-342-3p	ambiguous tail	G
mmu-miR-342-3p-1-1-A	3.34	-0.84	1.9	-0.44	0.6583		non-significant	mmu-miR-342-3p	ambiguous tail	A
mmu-miR-345-5p-1-0--	16.65	-1.17	0.74	-1.57	0.1159		non-significant	mmu-miR-345-5p	trimmed	other
mmu-miR-345-5p-0-0--	6.99	-0.98	1.14	-0.86	0.3895		non-significant	mmu-miR-345-5p	canonical	other
mmu-miR-345-5p-2-0--	1.32	-2.19	2.68	-0.82	0.4122		non-significant	mmu-miR-345-5p	trimmed	other
mmu-miR-345-3p-2-1-T	38.23	-0.61	0.69	-0.88	0.3771	0.6582	non-significant	mmu-miR-345-3p	ambiguous tail	U
mmu-miR-345-3p-1-0--	16.34	-0.12	0.67	-0.19	0.8532		non-significant	mmu-miR-345-3p	trimmed	other
mmu-miR-345-3p-2-2-TT	2.2	0.09	1.44	0.06	0.9512		non-significant	mmu-miR-345-3p	ambiguous tail	UU
mmu-miR-345-3p-2-2-TA	1.45	-1.21	3.01	-0.4	0.688		non-significant	mmu-miR-345-3p	ambiguous tail	UA
mmu-miR-770-5p-0-0--	316.16	-0.37	0.47	-0.78	0.4335	0.7187	non-significant	mmu-miR-770-5p	canonical	other
mmu-miR-770-5p-2-0--	63.42	-0.13	0.69	-0.18	0.8549	0.9404	non-significant	mmu-miR-770-5p	trimmed	other
mmu-miR-770-5p-0-1-T	48.27	-0.27	0.58	-0.47	0.6377	0.8561	non-significant	mmu-miR-770-5p	ambiguous tail	U
mmu-miR-770-5p-0-3-TGT	7.32	-0.41	1.01	-0.4	0.686		non-significant	mmu-miR-770-5p	NT tail	other
mmu-miR-770-5p-1-1-A	3.7	-2.85	2.26	-1.26	0.208		non-significant	mmu-miR-770-5p	ambiguous tail	A
mmu-miR-770-3p-0-0--	85.59	-0.74	0.44	-1.67	0.0947	0.3169	non-significant	mmu-miR-770-3p	canonical	other
mmu-miR-770-3p-2-0--	54.66	-0.64	0.45	-1.41	0.1591	0.4158	non-significant	mmu-miR-770-3p	trimmed	other
mmu-miR-770-3p-1-1-T	55.59	-0.74	0.41	-1.81	0.0704	0.2694	non-significant	mmu-miR-770-3p	ambiguous tail	U
mmu-miR-770-3p-2-1-T	27.42	0.38	0.7	0.55	0.5823	0.8172	non-significant	mmu-miR-770-3p	ambiguous tail	U
mmu-miR-770-3p-1-0--	22.57	-0.29	0.64	-0.45	0.6551	0.8632	non-significant	mmu-miR-770-3p	trimmed	other
mmu-miR-770-3p-3-0--	15.77	-1.17	0.84	-1.4	0.1611		non-significant	mmu-miR-770-3p	trimmed	other
mmu-miR-770-3p-2-2-TT	10.17	-0.29	0.75	-0.39	0.695		non-significant	mmu-miR-770-3p	ambiguous tail	UU
mmu-miR-770-3p-0-1-T	11.73	-0.58	0.87	-0.67	0.5023		non-significant	mmu-miR-770-3p	NT tail	U
mmu-miR-770-3p-1-3-TTT	3.47	-0.59	1.4	-0.42	0.6741		non-significant	mmu-miR-770-3p	ambiguous tail	UUU
mmu-miR-673-5p-1-0--	661.42	0.15	0.33	0.47	0.6416	0.8572	non-significant	mmu-miR-673-5p	trimmed	other
mmu-miR-673-5p-0-1-C	429.02	-0.76	0.39	-1.94	0.0523	0.232	non-significant	mmu-miR-673-5p	ambiguous tail	C
mmu-miR-673-5p-1-1-A	102.59	-0.36	0.49	-0.74	0.4607	0.7381	non-significant	mmu-miR-673-5p	ambiguous tail	A
mmu-miR-673-5p-0-1-A	100.22	-0.68	0.32	-2.12	0.0344	0.1815	non-significant	mmu-miR-673-5p	NT tail	A
mmu-miR-673-5p-0-0--	69.96	-0.26	0.43	-0.62	0.5368	0.7917	non-significant	mmu-miR-673-5p	canonical	other
mmu-miR-673-5p-2-0--	90	0.94	0.43	2.18	0.0291	0.1612	non-significant	mmu-miR-673-5p	trimmed	other
mmu-miR-673-5p-1-1-T	47.34	0.27	0.36	0.76	0.4478	0.7284	non-significant	mmu-miR-673-5p	ambiguous tail	U
mmu-miR-673-5p-0-1-T	37.57	-0.82	0.55	-1.48	0.1378	0.3872	non-significant	mmu-miR-673-5p	NT tail	U
mmu-miR-673-5p-1-2-TT	13.35	0.18	0.75	0.23	0.8148		non-significant	mmu-miR-673-5p	ambiguous tail	UU
mmu-miR-673-5p-1-2-AA	14.94	0.11	0.88	0.12	0.9026		non-significant	mmu-miR-673-5p	ambiguous tail	AA
mmu-miR-673-5p-2-1-T	14.56	1.13	0.67	1.69	0.0918		non-significant	mmu-miR-673-5p	ambiguous tail	U
mmu-miR-673-5p-2-2-TA	15.52	-0.72	0.78	-0.93	0.3503		non-significant	mmu-miR-673-5p	ambiguous tail	UA
mmu-miR-673-5p-0-2-TT	5.41	-0.73	1.42	-0.51	0.6078		non-significant	mmu-miR-673-5p	NT tail	UU
mmu-miR-673-5p-1-2-AT	10.74	-0.59	0.91	-0.66	0.512		non-significant	mmu-miR-673-5p	ambiguous tail	AU
mmu-miR-673-3p-0-0--	765.84	-0.39	0.31	-1.26	0.2087	0.481	non-significant	mmu-miR-673-3p	canonical	other
mmu-miR-673-3p-1-1-T	182.48	-0.33	0.31	-1.05	0.2934	0.5817	non-significant	mmu-miR-673-3p	ambiguous tail	U
mmu-miR-673-3p-1-0--	57.41	0.17	0.52	0.34	0.735	0.8989	non-significant	mmu-miR-673-3p	trimmed	other
mmu-miR-673-3p-2-0--	21.19	0.41	0.58	0.72	0.4736	0.746	non-significant	mmu-miR-673-3p	trimmed	other
mmu-miR-673-3p-3-0--	23.14	0.54	0.67	0.81	0.4193	0.7035	non-significant	mmu-miR-673-3p	trimmed	other
mmu-miR-673-3p-0-1-T	20.68	-0.26	0.62	-0.42	0.6737	0.8726	non-significant	mmu-miR-673-3p	NT tail	U
mmu-miR-673-3p-3-1-T	7.51	0.84	1.04	0.81	0.4176		non-significant	mmu-miR-673-3p	ambiguous tail	U
mmu-miR-493-5p-0-3-ATT	81.12	0.26	0.51	0.51	0.6116	0.8386	non-significant	mmu-miR-493-5p	ambiguous tail	AUU
mmu-miR-493-5p-0-2-AT	19.84	0.66	0.7	0.95	0.3432	0.6264	non-significant	mmu-miR-493-5p	ambiguous tail	AU
mmu-miR-493-3p-0-0--	8.08	0.45	1.03	0.43	0.6638		non-significant	mmu-miR-493-3p	canonical	other
mmu-miR-493-3p-3-0--	11.08	0.2	0.81	0.25	0.8013		non-significant	mmu-miR-493-3p	trimmed	other
mmu-miR-337-5p-0-0--	778.62	-0.04	0.19	-0.21	0.8332	0.9333	non-significant	mmu-miR-337-5p	canonical	other
mmu-miR-337-5p-1-0--	249.98	-0.16	0.3	-0.53	0.5988	0.8312	non-significant	mmu-miR-337-5p	trimmed	other
mmu-miR-337-5p-2-0--	57.25	0.03	0.43	0.07	0.9426	0.9784	non-significant	mmu-miR-337-5p	trimmed	other
mmu-miR-337-5p-0-1-T	20.9	0.17	0.71	0.23	0.8143	0.9276	non-significant	mmu-miR-337-5p	NT tail	U
mmu-miR-337-5p-1-1-A	23.82	-0.03	0.54	-0.06	0.9525	0.9818	non-significant	mmu-miR-337-5p	ambiguous tail	A
mmu-miR-337-5p-3-0--	6.48	0.44	1.24	0.35	0.7231		non-significant	mmu-miR-337-5p	trimmed	other
mmu-miR-337-3p-2-0--	28.83	-0.29	0.48	-0.61	0.5419	0.7962	non-significant	mmu-miR-337-3p	trimmed	other
mmu-miR-337-3p-0-0--	12.57	-0.49	0.82	-0.6	0.5516		non-significant	mmu-miR-337-3p	canonical	other
mmu-miR-540-5p-2-0--	194.88	-1.19	0.44	-2.72	0.0066	0.0635	non-significant	mmu-miR-540-5p	trimmed	other
mmu-miR-540-3p-0-2-GC	838.58	0.38	0.32	1.19	0.2341	0.5154	non-significant	mmu-miR-540-3p	ambiguous tail	other
mmu-miR-540-3p-0-3-GCT	21.08	0.08	0.55	0.14	0.8893	0.9647	non-significant	mmu-miR-540-3p	NT tail	other
mmu-miR-540-3p-0-1-G	12.69	-0.22	0.66	-0.34	0.7317		non-significant	mmu-miR-540-3p	ambiguous tail	G
mmu-miR-540-3p-0-3-GAT	14.34	0.3	0.87	0.34	0.7301		non-significant	mmu-miR-540-3p	NT tail	other
mmu-miR-540-3p-0-0--	6.9	-0.52	1.04	-0.5	0.6192		non-significant	mmu-miR-540-3p	canonical	other
mmu-miR-540-3p-0-2-GT	10.4	0.15	0.97	0.15	0.8782		non-significant	mmu-miR-540-3p	NT tail	other
mmu-miR-540-3p-0-2-GA	6.58	-1	1.25	-0.8	0.421		non-significant	mmu-miR-540-3p	NT tail	other
mmu-miR-665-3p-0-2-TA	146.13	-0.94	0.55	-1.7	0.0884	0.3046	non-significant	mmu-miR-665-3p	ambiguous tail	UA
mmu-miR-665-3p-0-2-TT	30.69	-0.96	0.54	-1.78	0.0749	0.2781	non-significant	mmu-miR-665-3p	NT tail	UU
mmu-miR-665-3p-0-1-T	42.41	-0.21	0.59	-0.36	0.7189	0.8949	non-significant	mmu-miR-665-3p	ambiguous tail	U
mmu-miR-665-3p-0-0--	23.27	-0.91	0.58	-1.56	0.1197	0.3614	non-significant	mmu-miR-665-3p	canonical	other
mmu-miR-665-3p-0-3-TAC	4.69	-1.59	1.46	-1.09	0.2743		non-significant	mmu-miR-665-3p	ambiguous tail	other
mmu-miR-431-5p-1-0--	304.45	-0.11	0.34	-0.33	0.7388	0.8989	non-significant	mmu-miR-431-5p	trimmed	other
mmu-miR-431-5p-0-0--	35.13	0.5	0.53	0.95	0.3398	0.6235	non-significant	mmu-miR-431-5p	canonical	other
mmu-miR-431-5p-2-0--	11.2	0.38	0.82	0.47	0.6386		non-significant	mmu-miR-431-5p	trimmed	other
mmu-miR-431-5p-0-1-G	1.58	0.09	2.45	0.04	0.9714		non-significant	mmu-miR-431-5p	ambiguous tail	G
mmu-miR-431-3p-0-0--	515.93	-0.96	0.27	-3.6	0.0003	0.0092	non-significant	mmu-miR-431-3p	canonical	other
mmu-miR-431-3p-1-0--	53.55	-0.64	0.38	-1.66	0.0979	0.3229	non-significant	mmu-miR-431-3p	trimmed	other
mmu-miR-431-3p-2-0--	21.37	-0.28	0.59	-0.48	0.6318	0.8506	non-significant	mmu-miR-431-3p	trimmed	other
mmu-miR-431-3p-3-0--	7.39	-0.23	0.95	-0.24	0.8089		non-significant	mmu-miR-431-3p	trimmed	other
mmu-miR-433-5p-0-0--	66.18	0.3	0.36	0.81	0.4164	0.7006	non-significant	mmu-miR-433-5p	canonical	other
mmu-miR-433-5p-1-0--	36.04	0.04	0.42	0.09	0.9313	0.9745	non-significant	mmu-miR-433-5p	trimmed	other
mmu-miR-433-5p-0-1-T	4.62	0.13	1.41	0.09	0.9245		non-significant	mmu-miR-433-5p	NT tail	U
mmu-miR-433-5p-2-0--	4.41	-1.06	1.35	-0.78	0.4357		non-significant	mmu-miR-433-5p	trimmed	other
mmu-miR-433-5p-0-1-A	1.82	-1.45	2.83	-0.51	0.6078		non-significant	mmu-miR-433-5p	ambiguous tail	A
mmu-miR-433-3p-0-0--	5249.69	-0.49	0.25	-1.96	0.05	0.2262	non-significant	mmu-miR-433-3p	canonical	other
mmu-miR-433-3p-0-1-T	451.28	-0.12	0.39	-0.3	0.7604	0.9079	non-significant	mmu-miR-433-3p	ambiguous tail	U
mmu-miR-433-3p-1-1-G	473.41	0.63	0.25	2.5	0.0123	0.0957	non-significant	mmu-miR-433-3p	ambiguous tail	G
mmu-miR-433-3p-1-0--	148.71	-0.08	0.3	-0.28	0.7775	0.9082	non-significant	mmu-miR-433-3p	trimmed	other
mmu-miR-433-3p-2-0--	98.94	-0.48	0.4	-1.19	0.2326	0.5144	non-significant	mmu-miR-433-3p	trimmed	other
mmu-miR-433-3p-0-2-TT	50.91	-0.6	0.42	-1.42	0.1553	0.4109	non-significant	mmu-miR-433-3p	NT tail	UU
mmu-miR-433-3p-3-0--	36.49	-0.46	0.54	-0.84	0.4008	0.6847	non-significant	mmu-miR-433-3p	trimmed	other
mmu-miR-433-3p-1-1-A	35.21	-0.27	0.52	-0.51	0.6091	0.8382	non-significant	mmu-miR-433-3p	ambiguous tail	A
mmu-miR-433-3p-0-1-A	36.3	-0.8	0.7	-1.15	0.2515	0.5381	non-significant	mmu-miR-433-3p	NT tail	A
mmu-miR-433-3p-3-1-A	8.6	-3.98	2.42	-1.64	0.1007		non-significant	mmu-miR-433-3p	ambiguous tail	A
mmu-miR-433-3p-0-3-ATT	6.92	-3.58	2.43	-1.47	0.1402		non-significant	mmu-miR-433-3p	NT tail	AUU
mmu-miR-433-3p-0-2-AT	18.73	-0.73	0.83	-0.88	0.3785	0.6601	non-significant	mmu-miR-433-3p	NT tail	AU
mmu-miR-127-5p-0-1-T	374.39	-0.86	0.25	-3.44	0.0006	0.0146	non-significant	mmu-miR-127-5p	ambiguous tail	U
mmu-miR-127-5p-0-0--	208.03	-0.78	0.24	-3.29	0.001	0.0196	non-significant	mmu-miR-127-5p	canonical	other
mmu-miR-127-5p-1-0--	34.25	-0.72	0.54	-1.33	0.1829	0.4485	non-significant	mmu-miR-127-5p	trimmed	other
mmu-miR-127-5p-0-2-TT	30.73	-0.93	0.45	-2.07	0.0381	0.1933	non-significant	mmu-miR-127-5p	NT tail	UU
mmu-miR-127-5p-2-1-T	17.98	0.55	0.63	0.88	0.3808	0.6628	non-significant	mmu-miR-127-5p	ambiguous tail	U
mmu-miR-127-5p-3-0--	4.99	-2.8	1.79	-1.57	0.1172		non-significant	mmu-miR-127-5p	trimmed	other
mmu-miR-127-5p-0-1-A	11.98	-1.48	0.89	-1.66	0.0969		non-significant	mmu-miR-127-5p	NT tail	A
mmu-miR-127-5p-1-1-A	1.18	-2.43	3.34	-0.73	0.466		non-significant	mmu-miR-127-5p	ambiguous tail	A
mmu-miR-127-5p-0-2-CT	2.53	-1.34	1.93	-0.69	0.4881		non-significant	mmu-miR-127-5p	NT tail	other
mmu-miR-127-3p-0-0--	488683	-0.31	0.14	-2.24	0.0251	0.1475	non-significant	mmu-miR-127-3p	canonical	other
mmu-miR-127-3p-1-0--	268014	-0.3	0.17	-1.81	0.0697	0.2687	non-significant	mmu-miR-127-3p	trimmed	other
mmu-miR-127-3p-2-0--	49913.6	0.04	0.19	0.22	0.828	0.9333	non-significant	mmu-miR-127-3p	trimmed	other
mmu-miR-127-3p-1-1-A	40571.2	-0.49	0.15	-3.32	0.0009	0.0182	non-significant	mmu-miR-127-3p	ambiguous tail	A
mmu-miR-127-3p-0-1-T	27053.3	-0.31	0.18	-1.72	0.0862	0.3005	non-significant	mmu-miR-127-3p	NT tail	U
mmu-miR-127-3p-1-2-AT	25701.1	-0.53	0.18	-2.86	0.0043	0.048	non-significant	mmu-miR-127-3p	ambiguous tail	AU
mmu-miR-127-3p-2-2-TT	15602.1	-0.23	0.16	-1.42	0.1546	0.4103	non-significant	mmu-miR-127-3p	ambiguous tail	UU
mmu-miR-127-3p-2-1-A	19031.3	-0.28	0.25	-1.08	0.2792	0.5652	non-significant	mmu-miR-127-3p	ambiguous tail	A
mmu-miR-127-3p-0-2-TT	6081.15	-0.29	0.19	-1.55	0.1202	0.3614	non-significant	mmu-miR-127-3p	NT tail	UU
mmu-miR-127-3p-2-1-T	5738.29	-0.13	0.19	-0.67	0.5023	0.762	non-significant	mmu-miR-127-3p	ambiguous tail	U
mmu-miR-127-3p-2-2-TA	6989.67	-0.53	0.15	-3.57	0.0004	0.01	non-significant	mmu-miR-127-3p	ambiguous tail	UA
mmu-miR-127-3p-0-2-AT	13624.1	-1.2	0.59	-2.04	0.0416	0.2028	non-significant	mmu-miR-127-3p	NT tail	AU
mmu-miR-127-3p-0-3-TTT	2404.3	-0.39	0.22	-1.73	0.0844	0.2985	non-significant	mmu-miR-127-3p	NT tail	UUU
mmu-miR-127-3p-1-3-ATT	3434.34	-0.67	0.2	-3.37	0.0008	0.0166	non-significant	mmu-miR-127-3p	ambiguous tail	AUU
mmu-miR-127-3p-1-1-G	3853.11	0.97	0.24	4.12	0	0.0022	non-significant	mmu-miR-127-3p	ambiguous tail	G
mmu-miR-127-3p-0-3-ATT	4307.47	-1.4	0.51	-2.72	0.0066	0.0635	non-significant	mmu-miR-127-3p	NT tail	AUU
mmu-miR-127-3p-0-1-A	4287.36	-1.1	0.56	-1.96	0.0502	0.2263	non-significant	mmu-miR-127-3p	NT tail	A
mmu-miR-127-3p-1-2-AA	3005.63	-0.97	0.51	-1.9	0.0579	0.2464	non-significant	mmu-miR-127-3p	ambiguous tail	AA
mmu-miR-127-3p-0-1-C	665.02	-0.39	0.22	-1.79	0.0738	0.2771	non-significant	mmu-miR-127-3p	NT tail	C
mmu-miR-127-3p-0-2-TA	1370.31	-0.89	0.5	-1.77	0.0775	0.2831	non-significant	mmu-miR-127-3p	NT tail	UA
mmu-miR-127-3p-2-2-AA	743.72	-0.39	0.36	-1.1	0.2719	0.5599	non-significant	mmu-miR-127-3p	ambiguous tail	AA
mmu-miR-127-3p-0-3-TAT	871.82	-1.03	0.56	-1.84	0.0657	0.2615	non-significant	mmu-miR-127-3p	NT tail	UAU
mmu-miR-127-3p-0-2-TC	337	-0.28	0.25	-1.12	0.2631	0.5507	non-significant	mmu-miR-127-3p	NT tail	other
mmu-miR-127-3p-0-2-CT	240.22	-0.24	0.28	-0.86	0.3894	0.6699	non-significant	mmu-miR-127-3p	NT tail	other
mmu-miR-127-3p-1-2-GT	272.57	-0.55	0.3	-1.79	0.0728	0.2756	non-significant	mmu-miR-127-3p	ambiguous tail	other
mmu-miR-127-3p-1-3-AAT	453.29	-1.24	0.53	-2.36	0.0185	0.1257	non-significant	mmu-miR-127-3p	ambiguous tail	AAU
mmu-miR-127-3p-0-3-TTC	148.15	-0.59	0.38	-1.52	0.1279	0.3748	non-significant	mmu-miR-127-3p	NT tail	other
mmu-miR-127-3p-2-3-TAT	212.73	-0.73	0.4	-1.8	0.0715	0.2715	non-significant	mmu-miR-127-3p	ambiguous tail	UAU
mmu-miR-127-3p-1-4-ATTT	166.69	-0.33	0.35	-0.93	0.3503	0.6317	non-significant	mmu-miR-127-3p	ambiguous tail	other
mmu-miR-127-3p-2-2-TG	213.29	-0.26	0.21	-1.25	0.212	0.4834	non-significant	mmu-miR-127-3p	ambiguous tail	other
mmu-miR-127-3p-1-1-C	232.4	0.87	0.42	2.06	0.0394	0.1969	non-significant	mmu-miR-127-3p	ambiguous tail	C
mmu-miR-127-3p-0-3-TCT	105.65	-0.55	0.37	-1.5	0.1339	0.3846	non-significant	mmu-miR-127-3p	NT tail	other
mmu-miR-127-3p-6-6-GTCGCT	59.08	-3.07	0.99	-3.09	0.002	0.0296	significant	mmu-miR-127-3p	ambiguous tail	other
mmu-miR-127-3p-9-9-GGCTTGGCT	132.78	-0.62	0.31	-1.98	0.0473	0.2194	non-significant	mmu-miR-127-3p	ambiguous tail	other
mmu-miR-127-3p-1-2-AC	199.68	-1.1	0.34	-3.28	0.001	0.0199	significant	mmu-miR-127-3p	ambiguous tail	other
mmu-miR-127-3p-2-3-TTT	96.07	-0.54	0.39	-1.38	0.1662	0.4273	non-significant	mmu-miR-127-3p	ambiguous tail	UUU
mmu-miR-127-3p-0-3-ATA	1042.43	-1.95	0.84	-2.32	0.0201	0.132	non-significant	mmu-miR-127-3p	NT tail	AUA
mmu-miR-127-3p-0-2-AA	966.1	-2.19	1.03	-2.13	0.0329	0.1777	non-significant	mmu-miR-127-3p	NT tail	AA
mmu-miR-127-3p-5-5-AGGCT	108.74	-0.57	0.37	-1.56	0.1179	0.3592	non-significant	mmu-miR-127-3p	ambiguous tail	other
mmu-miR-127-3p-3-0--	136.95	0.53	0.58	0.92	0.3591	0.6413	non-significant	mmu-miR-127-3p	trimmed	other
mmu-miR-127-3p-6-6-CTGGCT	95.89	-0.48	0.33	-1.48	0.1382	0.3872	non-significant	mmu-miR-127-3p	ambiguous tail	other
mmu-miR-127-3p-2-2-AT	149.04	-0.02	0.31	-0.07	0.9476	0.9804	non-significant	mmu-miR-127-3p	ambiguous tail	AU
mmu-miR-127-3p-2-3-TAA	125.6	-0.82	0.4	-2.04	0.0418	0.203	non-significant	mmu-miR-127-3p	ambiguous tail	UAA
mmu-miR-127-3p-3-1-A	201.03	-0.82	0.45	-1.84	0.0652	0.2615	non-significant	mmu-miR-127-3p	ambiguous tail	A
mmu-miR-127-3p-2-4-TATT	97.81	-0.62	0.42	-1.47	0.1417	0.3897	non-significant	mmu-miR-127-3p	ambiguous tail	other
mmu-miR-127-3p-5-5-CGGCT	71.28	-0.67	0.41	-1.63	0.1037	0.3347	non-significant	mmu-miR-127-3p	ambiguous tail	other
mmu-miR-127-3p-5-4-AGGC	61.39	-0.86	0.46	-1.88	0.0605	0.2542	non-significant	mmu-miR-127-3p	ambiguous tail	other
mmu-miR-127-3p-9-8-GGCTTGGC	65.32	-0.46	0.34	-1.38	0.1687	0.4324	non-significant	mmu-miR-127-3p	ambiguous tail	other
mmu-miR-127-3p-0-2-GT	149.37	-0.62	0.61	-1.03	0.3023	0.5908	non-significant	mmu-miR-127-3p	NT tail	other
mmu-miR-127-3p-1-3-ATA	271.52	-1.49	0.48	-3.1	0.002	0.0296	significant	mmu-miR-127-3p	ambiguous tail	AUA
mmu-miR-127-3p-6-6-ATGGCT	72.16	-0.47	0.33	-1.44	0.1506	0.4065	non-significant	mmu-miR-127-3p	ambiguous tail	other
mmu-miR-127-3p-0-1-G	194.45	-0.19	0.45	-0.41	0.6782	0.874	non-significant	mmu-miR-127-3p	ambiguous tail	G
mmu-miR-127-3p-7-7-ATTGGCT	77.61	0.14	0.34	0.41	0.684	0.8753	non-significant	mmu-miR-127-3p	ambiguous tail	other
mmu-miR-127-3p-6-5-CTGGC	47.78	-0.53	0.38	-1.4	0.1607	0.418	non-significant	mmu-miR-127-3p	ambiguous tail	other
mmu-miR-127-3p-6-5-ATGGC	49.5	-0.67	0.44	-1.52	0.1288	0.3756	non-significant	mmu-miR-127-3p	ambiguous tail	other
mmu-miR-127-3p-2-2-TC	87.11	-0.46	0.36	-1.28	0.2021	0.4734	non-significant	mmu-miR-127-3p	ambiguous tail	other
mmu-miR-127-3p-4-4-AGCT	37.63	-0.84	0.56	-1.5	0.1329	0.3824	non-significant	mmu-miR-127-3p	ambiguous tail	other
mmu-miR-127-3p-0-2-AC	261.93	-1.51	0.69	-2.19	0.0282	0.1572	non-significant	mmu-miR-127-3p	NT tail	other
mmu-miR-127-3p-5-4-CGGC	37.72	-0.48	0.61	-0.78	0.4336	0.7187	non-significant	mmu-miR-127-3p	ambiguous tail	other
mmu-miR-127-3p-0-3-CTT	47.55	-0.1	0.48	-0.21	0.8308	0.9333	non-significant	mmu-miR-127-3p	NT tail	other
mmu-miR-127-3p-3-1-T	58.16	-0.32	0.4	-0.81	0.4207	0.7036	non-significant	mmu-miR-127-3p	ambiguous tail	U
mmu-miR-127-3p-2-1-G	78.13	0.69	0.39	1.78	0.0752	0.2781	non-significant	mmu-miR-127-3p	ambiguous tail	G
mmu-miR-127-3p-0-3-TTA	96.36	-0.85	0.57	-1.49	0.1363	0.3861	non-significant	mmu-miR-127-3p	NT tail	UUA
mmu-miR-127-3p-7-7-TTTGGCT	43.07	-0.69	0.45	-1.53	0.1253	0.3704	non-significant	mmu-miR-127-3p	ambiguous tail	other
mmu-miR-127-3p-3-3-ACT	31.69	-1.9	0.97	-1.95	0.0514	0.2294	non-significant	mmu-miR-127-3p	ambiguous tail	other
mmu-miR-127-3p-3-3-TCT	51.62	0.53	0.38	1.41	0.1572	0.4131	non-significant	mmu-miR-127-3p	ambiguous tail	other
mmu-miR-127-3p-0-3-AAT	507.99	-1.77	1.72	-1.03	0.304	0.5922	non-significant	mmu-miR-127-3p	NT tail	AAU
mmu-miR-127-3p-7-6-ATTGGC	42.9	0.51	0.56	0.91	0.3603	0.6418	non-significant	mmu-miR-127-3p	ambiguous tail	other
mmu-miR-127-3p-4-4-TGCT	55.16	0.83	0.44	1.9	0.057	0.2457	non-significant	mmu-miR-127-3p	ambiguous tail	other
mmu-miR-127-3p-8-8-TCTTGGCT	52.79	0.38	0.38	1	0.318	0.6046	non-significant	mmu-miR-127-3p	ambiguous tail	other
mmu-miR-127-3p-0-3-AAA	316.14	-5.94	3.55	-1.67	0.0948	0.3169	non-significant	mmu-miR-127-3p	NT tail	AAA
mmu-miR-127-3p-0-3-TGT	40.71	-0.55	0.5	-1.1	0.2702	0.5587	non-significant	mmu-miR-127-3p	NT tail	other
mmu-miR-127-3p-8-7-TCTTGGC	29.44	0.84	1.11	0.76	0.4459	0.7279	non-significant	mmu-miR-127-3p	ambiguous tail	other
mmu-miR-127-3p-2-3-AAA	48.94	-0.43	0.4	-1.07	0.2861	0.5738	non-significant	mmu-miR-127-3p	ambiguous tail	AAA
mmu-miR-127-3p-1-2-AG	173.79	-1.04	0.63	-1.63	0.1023	0.3321	non-significant	mmu-miR-127-3p	ambiguous tail	other
mmu-miR-127-3p-9-9-TGCTTGGCT	32.33	0.45	0.48	0.95	0.34	0.6235	non-significant	mmu-miR-127-3p	ambiguous tail	other
mmu-miR-127-3p-3-2-AC	68.41	1.66	0.64	2.58	0.0098	0.0831	non-significant	mmu-miR-127-3p	ambiguous tail	other
mmu-miR-127-3p-1-4-AATT	67.07	-1.5	0.64	-2.34	0.0194	0.1302	non-significant	mmu-miR-127-3p	ambiguous tail	other
mmu-miR-127-3p-0-3-AGA	273.29	-5.57	3.55	-1.57	0.1168	0.3569	non-significant	mmu-miR-127-3p	NT tail	other
mmu-miR-127-3p-1-2-GA	95.94	-3.14	0.92	-3.4	0.0007	0.0158	significant	mmu-miR-127-3p	ambiguous tail	other
mmu-miR-127-3p-4-3-AGC	18.85	-0.84	0.57	-1.47	0.1422	0.3898	non-significant	mmu-miR-127-3p	ambiguous tail	other
mmu-miR-127-3p-1-3-GTT	31.8	-0.01	0.52	-0.01	0.991	0.9952	non-significant	mmu-miR-127-3p	ambiguous tail	other
mmu-miR-127-3p-8-8-ACTTGGCT	21.35	-1.85	0.97	-1.9	0.0574	0.2458	non-significant	mmu-miR-127-3p	ambiguous tail	other
mmu-miR-127-3p-6-6-GTGGCT	30.04	0.28	0.55	0.51	0.6086	0.8382	non-significant	mmu-miR-127-3p	ambiguous tail	other
mmu-miR-127-3p-8-7-CCTTGGC	25.07	0.15	1.17	0.13	0.9001	0.9675	non-significant	mmu-miR-127-3p	ambiguous tail	other
mmu-miR-127-3p-8-8-CCTTGGCT	33.73	0.82	0.49	1.68	0.0929	0.3143	non-significant	mmu-miR-127-3p	ambiguous tail	other
mmu-miR-127-3p-3-2-TC	29.54	0.53	0.46	1.14	0.2531	0.5386	non-significant	mmu-miR-127-3p	ambiguous tail	other
mmu-miR-127-3p-0-2-AG	232.86	-5.23	3.55	-1.47	0.141	0.3897	non-significant	mmu-miR-127-3p	NT tail	other
mmu-miR-127-3p-4-3-TGC	33.19	0.67	0.45	1.48	0.138	0.3872	non-significant	mmu-miR-127-3p	ambiguous tail	other
mmu-miR-127-3p-2-3-ATT	18.37	-1.75	0.98	-1.79	0.074	0.2771	non-significant	mmu-miR-127-3p	ambiguous tail	AUU
mmu-miR-127-3p-0-2-TG	36.78	-0.24	0.55	-0.44	0.6626	0.8664	non-significant	mmu-miR-127-3p	NT tail	other
mmu-miR-127-3p-2-2-GT	18.25	0.01	0.56	0.02	0.9873	0.9949	non-significant	mmu-miR-127-3p	ambiguous tail	other
mmu-miR-127-3p-2-2-AC	29.21	-2.23	0.86	-2.6	0.0093	0.0804	non-significant	mmu-miR-127-3p	ambiguous tail	other
mmu-miR-127-3p-7-6-TTTGGC	19.36	-1.68	1.01	-1.65	0.0981	0.3229	non-significant	mmu-miR-127-3p	ambiguous tail	other
mmu-miR-127-3p-2-3-TTA	13.43	-5.06	1.92	-2.63	0.0086		non-significant	mmu-miR-127-3p	ambiguous tail	UUA
mmu-miR-127-3p-1-3-ATC	21.47	-0.37	0.64	-0.58	0.5602	0.8081	non-significant	mmu-miR-127-3p	ambiguous tail	other
mmu-miR-127-3p-1-3-ACT	30.72	-0.79	0.56	-1.4	0.1616	0.419	non-significant	mmu-miR-127-3p	ambiguous tail	other
mmu-miR-127-3p-0-3-TAA	118.69	-5.48	2.57	-2.13	0.0332	0.1784	non-significant	mmu-miR-127-3p	NT tail	UAA
mmu-miR-127-3p-1-3-AAA	124.84	-5.77	1.35	-4.27	0	0.0015	significant	mmu-miR-127-3p	ambiguous tail	AAA
mmu-miR-127-3p-0-3-ATC	27.78	-4.52	2.13	-2.12	0.0338	0.1792	non-significant	mmu-miR-127-3p	NT tail	other
mmu-miR-127-3p-0-3-TAC	29.63	-4.84	1.33	-3.63	0.0003	0.0085	significant	mmu-miR-127-3p	NT tail	other
mmu-miR-127-3p-0-3-TGA	74.31	-3.27	1.25	-2.61	0.0092	0.0804	non-significant	mmu-miR-127-3p	NT tail	other
mmu-miR-127-3p-2-3-TAC	24.73	-1.89	0.9	-2.11	0.0353	0.1847	non-significant	mmu-miR-127-3p	ambiguous tail	other
mmu-miR-127-3p-1-4-ATAT	31.58	-0.34	1.09	-0.31	0.7558	0.9068	non-significant	mmu-miR-127-3p	ambiguous tail	other
mmu-miR-127-3p-2-3-AAT	21.78	-2.1	0.95	-2.22	0.0264	0.1524	non-significant	mmu-miR-127-3p	ambiguous tail	AAU
mmu-miR-127-3p-6-4-GTGG	24.75	0.71	0.6	1.18	0.2398	0.5241	non-significant	mmu-miR-127-3p	ambiguous tail	other
mmu-miR-127-3p-0-3-ACT	49.82	-4.57	3.36	-1.36	0.1741	0.4356	non-significant	mmu-miR-127-3p	NT tail	other
mmu-miR-127-3p-4-4-CGCT	8.99	-0.86	1.95	-0.44	0.6584		non-significant	mmu-miR-127-3p	ambiguous tail	other
mmu-miR-127-3p-6-5-GTGGC	9.09	-4.25	2.09	-2.03	0.0425		non-significant	mmu-miR-127-3p	ambiguous tail	other
mmu-miR-127-3p-0-3-AGT	71.73	-4.23	3.36	-1.26	0.2082	0.481	non-significant	mmu-miR-127-3p	NT tail	other
mmu-miR-127-3p-0-2-GA	84.38	-4.12	3.39	-1.22	0.2243	0.5013	non-significant	mmu-miR-127-3p	NT tail	other
mmu-miR-127-3p-1-4-ATTA	25.56	-0.69	1.57	-0.44	0.6591	0.8646	non-significant	mmu-miR-127-3p	ambiguous tail	other
mmu-miR-127-3p-2-3-AGA	22.45	-4.3	1.76	-2.45	0.0145	0.1069	non-significant	mmu-miR-127-3p	ambiguous tail	other
mmu-miR-127-3p-2-2-AG	12.97	-0.71	1.38	-0.52	0.6061		non-significant	mmu-miR-127-3p	ambiguous tail	other
mmu-miR-127-3p-1-3-AGT	83.75	-2.85	1.37	-2.08	0.0375	0.1925	non-significant	mmu-miR-127-3p	ambiguous tail	other
mmu-miR-434-5p-1-0--	4174.21	-0.12	0.24	-0.52	0.5997	0.8319	non-significant	mmu-miR-434-5p	trimmed	other
mmu-miR-434-5p-0-0--	3939.99	-0.41	0.42	-0.98	0.3286	0.6137	non-significant	mmu-miR-434-5p	canonical	other
mmu-miR-434-5p-2-1-A	310.7	-0.36	0.28	-1.3	0.193	0.4627	non-significant	mmu-miR-434-5p	ambiguous tail	A
mmu-miR-434-5p-2-0--	338.94	0.64	0.24	2.73	0.0064	0.0629	non-significant	mmu-miR-434-5p	trimmed	other
mmu-miR-434-5p-1-1-T	67.62	-0.2	0.38	-0.53	0.5958	0.8289	non-significant	mmu-miR-434-5p	ambiguous tail	U
mmu-miR-434-5p-1-1-G	22.04	0.94	0.66	1.43	0.1519	0.407	non-significant	mmu-miR-434-5p	ambiguous tail	G
mmu-miR-434-5p-0-2-TT	8.07	1.05	1.56	0.67	0.5019		non-significant	mmu-miR-434-5p	ambiguous tail	UU
mmu-miR-434-3p-0-0--	46663.5	-0.52	0.34	-1.53	0.125	0.3704	non-significant	mmu-miR-434-3p	canonical	other
mmu-miR-434-3p-1-0--	2873	-0.39	0.16	-2.5	0.0125	0.0971	non-significant	mmu-miR-434-3p	trimmed	other
mmu-miR-434-3p-3-0--	1918.37	-0.1	0.26	-0.41	0.6848	0.8756	non-significant	mmu-miR-434-3p	trimmed	other
mmu-miR-434-3p-1-1-G	338.57	0.82	0.3	2.78	0.0054	0.0566	non-significant	mmu-miR-434-3p	ambiguous tail	G
mmu-miR-434-3p-0-1-T	131.59	-0.88	0.26	-3.39	0.0007	0.0159	non-significant	mmu-miR-434-3p	NT tail	U
mmu-miR-434-3p-2-0--	120.69	0.21	0.38	0.56	0.5775	0.8163	non-significant	mmu-miR-434-3p	trimmed	other
mmu-miR-434-3p-8-8-TGACTCCT	25.28	-0.18	0.57	-0.32	0.7457	0.9006	non-significant	mmu-miR-434-3p	ambiguous tail	other
mmu-miR-434-3p-1-1-A	22.01	0.41	0.57	0.72	0.4741	0.746	non-significant	mmu-miR-434-3p	ambiguous tail	A
mmu-miR-434-3p-1-1-C	23.69	0.16	0.52	0.3	0.7631	0.9079	non-significant	mmu-miR-434-3p	ambiguous tail	C
mmu-miR-434-3p-2-1-T	13.29	-1.42	1.53	-0.93	0.3535		non-significant	mmu-miR-434-3p	ambiguous tail	U
mmu-miR-136-5p-1-0--	1288.61	1.11	0.43	2.6	0.0092	0.0804	non-significant	mmu-miR-136-5p	trimmed	other
mmu-miR-136-5p-0-0--	28.94	1.61	0.81	1.98	0.0474	0.2194	non-significant	mmu-miR-136-5p	canonical	other
mmu-miR-136-5p-2-1-A	6.21	-0.35	1.33	-0.26	0.7915		non-significant	mmu-miR-136-5p	ambiguous tail	A
mmu-miR-136-3p-1-0--	1859.07	-0.11	0.38	-0.29	0.7683	0.9079	non-significant	mmu-miR-136-3p	trimmed	other
mmu-miR-136-3p-0-0--	173.92	-0.08	0.34	-0.24	0.8122	0.926	non-significant	mmu-miR-136-3p	canonical	other
mmu-miR-136-3p-2-0--	136.06	0.12	0.36	0.33	0.7414	0.8989	non-significant	mmu-miR-136-3p	trimmed	other
mmu-miR-341-5p-0-0--	13.12	-0.65	0.67	-0.98	0.3269		non-significant	mmu-miR-341-5p	canonical	other
mmu-miR-341-3p-0-0--	1257.03	-0.55	0.19	-2.89	0.0038	0.0452	non-significant	mmu-miR-341-3p	canonical	other
mmu-miR-341-3p-0-1-T	478.08	-0.53	0.24	-2.22	0.0266	0.1528	non-significant	mmu-miR-341-3p	NT tail	U
mmu-miR-341-3p-1-1-C	182.95	-0.86	0.31	-2.75	0.0059	0.0596	non-significant	mmu-miR-341-3p	ambiguous tail	C
mmu-miR-341-3p-1-0--	35.65	0.52	0.43	1.22	0.2222	0.4992	non-significant	mmu-miR-341-3p	trimmed	other
mmu-miR-341-3p-0-1-C	32.51	-0.78	0.46	-1.68	0.093	0.3143	non-significant	mmu-miR-341-3p	ambiguous tail	C
mmu-miR-341-3p-0-1-A	21.82	-1.63	0.62	-2.64	0.0082	0.0743	non-significant	mmu-miR-341-3p	NT tail	A
mmu-miR-341-3p-1-1-A	10.7	-0.69	1.29	-0.54	0.5917		non-significant	mmu-miR-341-3p	ambiguous tail	A
mmu-miR-341-3p-1-1-G	7.67	1.25	0.96	1.3	0.1952		non-significant	mmu-miR-341-3p	ambiguous tail	G
mmu-miR-1188-5p-0-0--	3.15	-1.06	1.56	-0.68	0.4994		non-significant	mmu-miR-1188-5p	canonical	other
mmu-miR-1188-5p-0-1-T	2.36	-1.95	1.98	-0.99	0.3235		non-significant	mmu-miR-1188-5p	ambiguous tail	U
mmu-miR-1188-5p-0-2-TT	3.27	-1.12	1.38	-0.81	0.4196		non-significant	mmu-miR-1188-5p	NT tail	UU
mmu-miR-1188-3p-2-0--	4.88	-1.12	1.11	-1	0.3161		non-significant	mmu-miR-1188-3p	trimmed	other
mmu-miR-370-5p-0-0--	9.81	-0.17	1.01	-0.16	0.869		non-significant	mmu-miR-370-5p	canonical	other
mmu-miR-370-5p-0-2-AC	19.91	-0.22	0.62	-0.36	0.721	0.8956	non-significant	mmu-miR-370-5p	ambiguous tail	other
mmu-miR-370-5p-0-3-ACA	11.61	-0.93	0.79	-1.17	0.2424		non-significant	mmu-miR-370-5p	ambiguous tail	other
mmu-miR-370-5p-0-3-ACT	5.42	0.96	1.19	0.81	0.4172		non-significant	mmu-miR-370-5p	NT tail	other
mmu-miR-370-3p-0-0--	578.14	0.04	0.42	0.1	0.9179	0.9736	non-significant	mmu-miR-370-3p	canonical	other
mmu-miR-370-3p-0-1-A	167.47	-0.81	0.49	-1.65	0.0993	0.3254	non-significant	mmu-miR-370-3p	NT tail	A
mmu-miR-370-3p-3-0--	79.42	-0.41	0.55	-0.75	0.4536	0.733	non-significant	mmu-miR-370-3p	trimmed	other
mmu-miR-370-3p-0-1-T	62.34	0.15	0.54	0.28	0.7826	0.9082	non-significant	mmu-miR-370-3p	ambiguous tail	U
mmu-miR-370-3p-1-0--	29.79	0.41	0.57	0.71	0.4778	0.7476	non-significant	mmu-miR-370-3p	trimmed	other
mmu-miR-370-3p-1-1-C	18.92	0.07	0.82	0.09	0.9298	0.9745	non-significant	mmu-miR-370-3p	ambiguous tail	C
mmu-miR-370-3p-2-0--	28.85	0.04	0.8	0.04	0.9643	0.985	non-significant	mmu-miR-370-3p	trimmed	other
mmu-miR-370-3p-3-1-T	25.32	0.54	0.77	0.69	0.4883	0.751	non-significant	mmu-miR-370-3p	ambiguous tail	U
mmu-miR-370-3p-1-1-A	18.22	-0.1	0.86	-0.12	0.9063	0.9694	non-significant	mmu-miR-370-3p	ambiguous tail	A
mmu-miR-370-3p-2-3-AAA	15.97	-2.93	1.3	-2.25	0.0243		non-significant	mmu-miR-370-3p	ambiguous tail	AAA
mmu-miR-370-3p-1-2-AA	2.93	-0.62	1.89	-0.33	0.7418		non-significant	mmu-miR-370-3p	ambiguous tail	AA
mmu-miR-370-3p-2-2-TA	2.29	-2	2.57	-0.78	0.436		non-significant	mmu-miR-370-3p	ambiguous tail	UA
mmu-miR-379-5p-0-0--	7536.8	2	0.57	3.51	0.0005	0.0122	significant	mmu-miR-379-5p	canonical	other
mmu-miR-379-5p-1-0--	1995.57	2.82	0.64	4.4	0	0.001	significant	mmu-miR-379-5p	trimmed	other
mmu-miR-379-5p-0-1-T	462.52	1.52	0.56	2.71	0.0067	0.0635	non-significant	mmu-miR-379-5p	NT tail	U
mmu-miR-379-5p-0-1-A	460.57	1.29	0.51	2.53	0.0116	0.0932	non-significant	mmu-miR-379-5p	NT tail	A
mmu-miR-379-5p-0-2-AA	48.24	1.03	0.69	1.5	0.1329	0.3824	non-significant	mmu-miR-379-5p	NT tail	AA
mmu-miR-379-5p-1-1-T	85.6	2.07	0.55	3.74	0.0002	0.0062	significant	mmu-miR-379-5p	ambiguous tail	U
mmu-miR-379-5p-0-1-C	21.72	1.6	0.73	2.2	0.0278	0.1572	non-significant	mmu-miR-379-5p	ambiguous tail	C
mmu-miR-379-5p-1-1-A	22.86	0.91	1.53	0.59	0.5538	0.8042	non-significant	mmu-miR-379-5p	ambiguous tail	A
mmu-miR-379-3p-1-0--	226.86	0.51	0.29	1.72	0.086	0.3005	non-significant	mmu-miR-379-3p	trimmed	other
mmu-miR-379-3p-0-0--	43.07	0.48	0.4	1.19	0.2355	0.5165	non-significant	mmu-miR-379-3p	canonical	other
mmu-miR-379-3p-3-0--	27.09	0.57	0.54	1.06	0.289	0.5773	non-significant	mmu-miR-379-3p	trimmed	other
mmu-miR-379-3p-1-1-A	38.24	-0.1	0.5	-0.2	0.8451	0.9367	non-significant	mmu-miR-379-3p	ambiguous tail	A
mmu-miR-379-3p-2-1-T	5.11	-1.67	1.74	-0.96	0.337		non-significant	mmu-miR-379-3p	ambiguous tail	U
mmu-miR-411-5p-0-0--	1763.21	0.43	0.15	2.93	0.0034	0.0417	non-significant	mmu-miR-411-5p	canonical	other
mmu-miR-411-5p-1-0--	307.65	0.4	0.27	1.48	0.1401	0.3889	non-significant	mmu-miR-411-5p	trimmed	other
mmu-miR-411-5p-2-0--	63.06	0.58	0.33	1.73	0.0838	0.2968	non-significant	mmu-miR-411-5p	trimmed	other
mmu-miR-411-5p-0-1-T	14.35	-0.25	0.76	-0.32	0.7457		non-significant	mmu-miR-411-5p	NT tail	U
mmu-miR-411-3p-1-0--	323.64	0.77	0.27	2.82	0.0047	0.0518	non-significant	mmu-miR-411-3p	trimmed	other
mmu-miR-411-3p-0-0--	22.66	0.69	0.71	0.96	0.3346	0.619	non-significant	mmu-miR-411-3p	canonical	other
mmu-miR-411-3p-1-1-T	22.58	0.26	0.56	0.47	0.6396	0.8569	non-significant	mmu-miR-411-3p	ambiguous tail	U
mmu-miR-411-3p-2-1-T	21.87	0.68	0.51	1.33	0.1834	0.4491	non-significant	mmu-miR-411-3p	ambiguous tail	U
mmu-miR-411-3p-2-0--	10.13	1.03	1	1.03	0.302		non-significant	mmu-miR-411-3p	trimmed	other
mmu-miR-411-3p-3-0--	4.77	-1.84	1.26	-1.46	0.1442		non-significant	mmu-miR-411-3p	trimmed	other
mmu-miR-299a-5p-299b-5p-0-0--	23.2	-0.25	0.67	-0.38	0.7036	0.8871	non-significant	mmu-miR-299a-5p-299b-5p	canonical	other
mmu-miR-299a-5p-299b-5p-1-0--	10.9	0.14	0.93	0.15	0.8832		non-significant	mmu-miR-299a-5p-299b-5p	trimmed	other
mmu-miR-299a-5p-299b-5p-2-0--	23.05	-0.34	0.52	-0.67	0.506	0.7658	non-significant	mmu-miR-299a-5p-299b-5p	trimmed	other
mmu-miR-299b-3p-299a-3p-0-3-GCT	17.66	0.77	0.69	1.12	0.2646	0.5507	non-significant	mmu-miR-299b-3p-299a-3p	NT tail	other
mmu-miR-380-5p-1-0--	12.37	0.42	0.77	0.54	0.5884		non-significant	mmu-miR-380-5p	trimmed	other
mmu-miR-380-5p-0-1-T	6.39	1.23	0.89	1.37	0.1705		non-significant	mmu-miR-380-5p	NT tail	U
mmu-miR-380-5p-0-1-C	1.72	0.79	2.1	0.38	0.7066		non-significant	mmu-miR-380-5p	ambiguous tail	C
mmu-miR-380-3p-1-0--	1777.81	-0.14	0.3	-0.46	0.6464	0.8611	non-significant	mmu-miR-380-3p	trimmed	other
mmu-miR-380-3p-2-0--	13.52	0.71	0.63	1.13	0.2581		non-significant	mmu-miR-380-3p	trimmed	other
mmu-miR-380-3p-0-0--	7.38	-0.48	0.87	-0.55	0.5797		non-significant	mmu-miR-380-3p	canonical	other
mmu-miR-1197-3p-0-0--	27.66	-0.42	0.47	-0.89	0.3719	0.6538	non-significant	mmu-miR-1197-3p	canonical	other
mmu-miR-323-5p-0-0--	14.99	-0.56	0.82	-0.68	0.4995		non-significant	mmu-miR-323-5p	canonical	other
mmu-miR-323-5p-1-0--	9.42	-0.21	0.99	-0.22	0.8289		non-significant	mmu-miR-323-5p	trimmed	other
mmu-miR-323-3p-0-0--	465.97	-0.07	0.36	-0.19	0.8475	0.938	non-significant	mmu-miR-323-3p	canonical	other
mmu-miR-323-3p-1-0--	21.1	0	0.62	0	0.9975	0.9975	non-significant	mmu-miR-323-3p	trimmed	other
mmu-miR-323-3p-1-1-C	20.8	-0.13	0.57	-0.23	0.8172	0.9276	non-significant	mmu-miR-323-3p	ambiguous tail	C
mmu-miR-323-3p-1-1-A	15.44	0.13	0.65	0.2	0.84		non-significant	mmu-miR-323-3p	ambiguous tail	A
mmu-miR-323-3p-1-1-G	11.7	1.13	0.84	1.34	0.1792		non-significant	mmu-miR-323-3p	ambiguous tail	G
mmu-miR-323-3p-2-0--	6.61	1.29	1.03	1.26	0.2078		non-significant	mmu-miR-323-3p	trimmed	other
mmu-miR-758-3p-0-3-ACC	49.07	-0.93	0.62	-1.51	0.1305	0.3788	non-significant	mmu-miR-758-3p	ambiguous tail	other
mmu-miR-329-5p-0-0--	337.41	0.51	0.23	2.26	0.0241	0.146	non-significant	mmu-miR-329-5p	canonical	other
mmu-miR-329-5p-0-1-T	237.46	-0.09	0.31	-0.28	0.7807	0.9082	non-significant	mmu-miR-329-5p	ambiguous tail	U
mmu-miR-329-5p-0-3-TCT	75.96	-0.1	0.3	-0.34	0.734	0.8989	non-significant	mmu-miR-329-5p	ambiguous tail	other
mmu-miR-329-5p-1-0--	63.03	-0.05	0.38	-0.13	0.9005	0.9675	non-significant	mmu-miR-329-5p	trimmed	other
mmu-miR-329-5p-0-2-TC	36	-0.94	0.59	-1.58	0.1151	0.3552	non-significant	mmu-miR-329-5p	ambiguous tail	other
mmu-miR-329-5p-0-2-TT	9.69	-0.08	0.72	-0.11	0.9161		non-significant	mmu-miR-329-5p	NT tail	UU
mmu-miR-329-5p-2-0--	1.82	-0.56	2.15	-0.26	0.7937		non-significant	mmu-miR-329-5p	trimmed	other
mmu-miR-329-5p-3-0--	5.53	1.02	1.06	0.97	0.3335		non-significant	mmu-miR-329-5p	trimmed	other
mmu-miR-329-5p-1-1-A	4.65	0.59	1.23	0.48	0.6343		non-significant	mmu-miR-329-5p	ambiguous tail	A
mmu-miR-329-3p-0-0--	182.02	-0.91	0.3	-3.04	0.0024	0.0329	non-significant	mmu-miR-329-3p	canonical	other
mmu-miR-329-3p-1-1-C	39.14	-0.6	0.53	-1.14	0.2541	0.5401	non-significant	mmu-miR-329-3p	ambiguous tail	C
mmu-miR-329-3p-1-0--	52.88	-1.2	0.44	-2.74	0.0062	0.0622	non-significant	mmu-miR-329-3p	trimmed	other
mmu-miR-329-3p-0-1-T	19.64	-0.29	0.52	-0.55	0.5797	0.8163	non-significant	mmu-miR-329-3p	ambiguous tail	U
mmu-miR-329-3p-1-1-A	6.32	-1.16	1.01	-1.15	0.2489		non-significant	mmu-miR-329-3p	ambiguous tail	A
mmu-miR-329-3p-1-2-CT	5.15	-0.2	1.05	-0.19	0.8481		non-significant	mmu-miR-329-3p	ambiguous tail	other
mmu-miR-329-3p-2-0--	1.95	-0.5	1.77	-0.28	0.7776		non-significant	mmu-miR-329-3p	trimmed	other
mmu-miR-329-3p-2-2-CT	0.68	-1.56	3.69	-0.42	0.672		non-significant	mmu-miR-329-3p	ambiguous tail	other
mmu-miR-494-3p-0-1-T	2.28	-0.93	1.77	-0.53	0.5989		non-significant	mmu-miR-494-3p	ambiguous tail	U
mmu-miR-1193-3p-0-0--	8.16	-0.59	0.92	-0.64	0.5217		non-significant	mmu-miR-1193-3p	canonical	other
mmu-miR-1193-3p-0-1-C	3.65	-1.93	1.41	-1.37	0.1713		non-significant	mmu-miR-1193-3p	ambiguous tail	C
mmu-miR-1193-3p-1-0--	3.23	0.04	1.6	0.03	0.9783		non-significant	mmu-miR-1193-3p	trimmed	other
mmu-miR-1193-3p-0-1-T	3.2	1.15	1.76	0.65	0.5128		non-significant	mmu-miR-1193-3p	NT tail	U
mmu-miR-666-5p-1-0--	2867.23	-0.35	0.44	-0.78	0.4327	0.7187	non-significant	mmu-miR-666-5p	trimmed	other
mmu-miR-666-5p-0-1-T	386.92	-0.26	0.3	-0.87	0.3859	0.6673	non-significant	mmu-miR-666-5p	NT tail	U
mmu-miR-666-5p-0-0--	331.29	0.08	0.35	0.23	0.8175	0.9276	non-significant	mmu-miR-666-5p	canonical	other
mmu-miR-666-5p-2-1-A	187.25	-0.33	0.26	-1.26	0.2067	0.4788	non-significant	mmu-miR-666-5p	ambiguous tail	A
mmu-miR-666-5p-0-1-C	79.82	-0.48	0.41	-1.19	0.2349	0.5159	non-significant	mmu-miR-666-5p	ambiguous tail	C
mmu-miR-666-5p-3-0--	97.7	0.36	0.35	1.01	0.3104	0.5968	non-significant	mmu-miR-666-5p	trimmed	other
mmu-miR-666-5p-2-2-AA	38.39	-0.8	0.44	-1.84	0.0656	0.2615	non-significant	mmu-miR-666-5p	ambiguous tail	AA
mmu-miR-666-5p-2-1-T	37.47	-0.48	0.53	-0.9	0.3687	0.6509	non-significant	mmu-miR-666-5p	ambiguous tail	U
mmu-miR-666-5p-0-3-CCT	30.9	-1.4	0.51	-2.73	0.0063	0.0622	non-significant	mmu-miR-666-5p	NT tail	other
mmu-miR-666-5p-1-1-T	19.26	-0.05	0.73	-0.06	0.9503	0.9804	non-significant	mmu-miR-666-5p	ambiguous tail	U
mmu-miR-666-5p-2-0--	25.23	0.01	0.5	0.02	0.9876	0.9949	non-significant	mmu-miR-666-5p	trimmed	other
mmu-miR-666-5p-3-1-A	14.49	-0.93	1.06	-0.88	0.3786		non-significant	mmu-miR-666-5p	ambiguous tail	A
mmu-miR-666-3p-1-0--	360.03	0.35	0.28	1.23	0.2194	0.4958	non-significant	mmu-miR-666-3p	trimmed	other
mmu-miR-666-3p-0-1-C	112.02	-0.65	0.35	-1.86	0.0629	0.2567	non-significant	mmu-miR-666-3p	ambiguous tail	C
mmu-miR-666-3p-2-0--	111.47	0.65	0.42	1.55	0.1203	0.3614	non-significant	mmu-miR-666-3p	trimmed	other
mmu-miR-666-3p-0-2-CT	44.34	-1.42	0.61	-2.33	0.0196	0.1305	non-significant	mmu-miR-666-3p	NT tail	other
mmu-miR-666-3p-0-0--	32.7	-0.16	0.45	-0.35	0.7264	0.8973	non-significant	mmu-miR-666-3p	canonical	other
mmu-miR-666-3p-2-1-T	29.13	0.9	0.57	1.57	0.1173	0.3578	non-significant	mmu-miR-666-3p	ambiguous tail	U
mmu-miR-666-3p-0-1-T	11.62	-1.62	0.77	-2.11	0.0349		non-significant	mmu-miR-666-3p	NT tail	U
mmu-miR-666-3p-2-2-TT	11.07	1.03	0.79	1.31	0.1918		non-significant	mmu-miR-666-3p	ambiguous tail	UU
mmu-miR-666-3p-2-2-TA	12.49	0.33	0.89	0.37	0.7117		non-significant	mmu-miR-666-3p	ambiguous tail	UA
mmu-miR-666-3p-0-1-A	2.62	-3.37	2.6	-1.3	0.1947		non-significant	mmu-miR-666-3p	NT tail	A
mmu-miR-666-3p-4-2-GG	6.03	0.89	1.1	0.81	0.4199		non-significant	mmu-miR-666-3p	ambiguous tail	other
mmu-miR-543-5p-0-0--	10.86	-0.94	0.72	-1.31	0.1911		non-significant	mmu-miR-543-5p	canonical	other
mmu-miR-543-3p-0-0--	261.6	-0.23	0.34	-0.69	0.4924	0.7548	non-significant	mmu-miR-543-3p	canonical	other
mmu-miR-543-3p-0-1-T	64.78	-0.48	0.53	-0.91	0.3626	0.644	non-significant	mmu-miR-543-3p	ambiguous tail	U
mmu-miR-543-3p-1-0--	28.33	0.31	0.45	0.68	0.4985	0.7594	non-significant	mmu-miR-543-3p	trimmed	other
mmu-miR-543-3p-0-2-TT	3.23	-1.26	1.43	-0.88	0.3783		non-significant	mmu-miR-543-3p	ambiguous tail	UU
mmu-miR-543-3p-0-1-A	2.46	-1.09	1.84	-0.59	0.5548		non-significant	mmu-miR-543-3p	NT tail	A
mmu-miR-495-3p-0-0--	146.54	-0.14	0.53	-0.27	0.784	0.9082	non-significant	mmu-miR-495-3p	canonical	other
mmu-miR-495-3p-0-1-T	68.57	-0.31	0.56	-0.56	0.576	0.8163	non-significant	mmu-miR-495-3p	ambiguous tail	U
mmu-miR-495-3p-1-0--	7.86	1.72	1.09	1.58	0.114		non-significant	mmu-miR-495-3p	trimmed	other
mmu-miR-667-5p-3-0--	5.41	-0.52	1.27	-0.41	0.6828		non-significant	mmu-miR-667-5p	trimmed	other
mmu-miR-667-5p-1-0--	3.65	-2.38	1.58	-1.5	0.1324		non-significant	mmu-miR-667-5p	trimmed	other
mmu-miR-667-3p-0-0--	616.99	-1.07	0.51	-2.09	0.0366	0.1896	non-significant	mmu-miR-667-3p	canonical	other
mmu-miR-667-3p-0-1-T	185.63	-1.37	0.56	-2.43	0.0151	0.1106	non-significant	mmu-miR-667-3p	NT tail	U
mmu-miR-667-3p-1-1-T	77.31	-1.06	0.63	-1.67	0.095	0.3173	non-significant	mmu-miR-667-3p	ambiguous tail	U
mmu-miR-667-3p-1-0--	67.7	-1.71	0.64	-2.65	0.0082	0.074	non-significant	mmu-miR-667-3p	trimmed	other
mmu-miR-667-3p-2-1-T	38.87	-1.36	0.57	-2.39	0.017	0.1188	non-significant	mmu-miR-667-3p	ambiguous tail	U
mmu-miR-667-3p-0-1-A	101.11	-2.06	0.64	-3.2	0.0014	0.0238	significant	mmu-miR-667-3p	NT tail	A
mmu-miR-667-3p-2-2-TT	35.03	-1.39	0.75	-1.86	0.0632	0.2567	non-significant	mmu-miR-667-3p	ambiguous tail	UU
mmu-miR-667-3p-2-0--	23.5	-1.5	0.69	-2.16	0.0311	0.1708	non-significant	mmu-miR-667-3p	trimmed	other
mmu-miR-667-3p-1-2-TT	14.41	-1.53	0.91	-1.68	0.0939		non-significant	mmu-miR-667-3p	ambiguous tail	UU
mmu-miR-667-3p-1-1-A	38.76	-0.77	0.91	-0.84	0.3983	0.6816	non-significant	mmu-miR-667-3p	ambiguous tail	A
mmu-miR-667-3p-1-2-AA	16.38	-2.85	1.19	-2.39	0.017		non-significant	mmu-miR-667-3p	ambiguous tail	AA
mmu-miR-667-3p-2-3-TTT	4.81	-1.98	1.43	-1.39	0.1638		non-significant	mmu-miR-667-3p	ambiguous tail	UUU
mmu-miR-667-3p-0-2-TA	2.46	-2.04	2.15	-0.95	0.3415		non-significant	mmu-miR-667-3p	NT tail	UA
mmu-miR-376c-3p-0-0--	76.94	0.27	0.6	0.45	0.6522	0.8622	non-significant	mmu-miR-376c-3p	canonical	other
mmu-miR-376c-3p-1-0--	9.43	1.75	1.24	1.41	0.1583		non-significant	mmu-miR-376c-3p	trimmed	other
mmu-miR-376b-3p-1-1-C	323.94	-0.05	0.36	-0.13	0.899	0.9675	non-significant	mmu-miR-376b-3p	ambiguous tail	C
mmu-miR-376b-3p-0-0--	115.73	0.05	0.5	0.1	0.9228	0.9745	non-significant	mmu-miR-376b-3p	canonical	other
mmu-miR-376b-3p-1-0--	37.18	-0.02	0.61	-0.03	0.9728	0.9874	non-significant	mmu-miR-376b-3p	trimmed	other
mmu-miR-376b-3p-0-1-T	15.32	-0.05	0.73	-0.07	0.9467		non-significant	mmu-miR-376b-3p	ambiguous tail	U
mmu-miR-376a-5p-0-0--	25.12	0.26	0.48	0.54	0.5891	0.8208	non-significant	mmu-miR-376a-5p	canonical	other
mmu-miR-376a-5p-1-0--	6.07	0.84	1.17	0.72	0.4699		non-significant	mmu-miR-376a-5p	trimmed	other
mmu-miR-376a-5p-3-0--	7.33	1.15	1.09	1.05	0.2915		non-significant	mmu-miR-376a-5p	trimmed	other
mmu-miR-376a-3p-0-1-T	262.48	-0.48	0.49	-0.98	0.3277	0.6135	non-significant	mmu-miR-376a-3p	ambiguous tail	U
mmu-miR-376a-3p-0-0--	89.76	-0.49	0.36	-1.35	0.1767	0.4396	non-significant	mmu-miR-376a-3p	canonical	other
mmu-miR-376a-3p-1-0--	33.96	0.27	0.49	0.56	0.5768	0.8163	non-significant	mmu-miR-376a-3p	trimmed	other
mmu-miR-300-5p-0-2-GT	2.6	-0.79	1.97	-0.4	0.6888		non-significant	mmu-miR-300-5p	ambiguous tail	other
mmu-miR-300-5p-0-0--	2.65	-0.92	1.55	-0.6	0.5506		non-significant	mmu-miR-300-5p	canonical	other
mmu-miR-300-3p-2-0--	24026.2	-0.07	0.23	-0.32	0.7496	0.9026	non-significant	mmu-miR-300-3p	trimmed	other
mmu-miR-300-3p-0-0--	1393.2	-0.28	0.16	-1.72	0.0857	0.3005	non-significant	mmu-miR-300-3p	canonical	other
mmu-miR-300-3p-1-0--	1362.12	-0.06	0.16	-0.36	0.7221	0.8958	non-significant	mmu-miR-300-3p	trimmed	other
mmu-miR-300-3p-0-1-T	921.13	-0.44	0.17	-2.53	0.0116	0.0932	non-significant	mmu-miR-300-3p	NT tail	U
mmu-miR-300-3p-3-0--	343.4	-0.14	0.33	-0.42	0.6731	0.8726	non-significant	mmu-miR-300-3p	trimmed	other
mmu-miR-300-3p-0-1-A	1062.2	-1.48	0.68	-2.19	0.0283	0.1572	non-significant	mmu-miR-300-3p	NT tail	A
mmu-miR-300-3p-2-2-GT	182.58	-0.42	0.22	-1.96	0.0505	0.2263	non-significant	mmu-miR-300-3p	ambiguous tail	other
mmu-miR-300-3p-1-1-T	73.41	-0.41	0.42	-0.97	0.3324	0.6161	non-significant	mmu-miR-300-3p	ambiguous tail	U
mmu-miR-300-3p-3-1-G	36.97	1.14	0.45	2.51	0.0122	0.0957	non-significant	mmu-miR-300-3p	ambiguous tail	G
mmu-miR-381-3p-0-0--	17802.7	-0.31	0.14	-2.25	0.0243	0.146	non-significant	mmu-miR-381-3p	canonical	other
mmu-miR-381-3p-2-0--	6037.97	-0.51	0.25	-2.08	0.0374	0.1925	non-significant	mmu-miR-381-3p	trimmed	other
mmu-miR-381-3p-1-0--	237.38	0.03	0.23	0.14	0.8895	0.9647	non-significant	mmu-miR-381-3p	trimmed	other
mmu-miR-381-3p-3-0--	108.6	0.03	0.26	0.13	0.8997	0.9675	non-significant	mmu-miR-381-3p	trimmed	other
mmu-miR-381-3p-0-1-T	37.19	-0.93	0.5	-1.87	0.0621	0.2562	non-significant	mmu-miR-381-3p	NT tail	U
mmu-miR-381-3p-0-1-A	43.44	-0.73	0.51	-1.42	0.1552	0.4109	non-significant	mmu-miR-381-3p	NT tail	A
mmu-miR-381-3p-1-1-G	51.42	1.15	0.51	2.25	0.0247	0.1466	non-significant	mmu-miR-381-3p	ambiguous tail	G
mmu-miR-487b-3p-0-0--	3955.81	-0.11	0.28	-0.41	0.6836	0.8753	non-significant	mmu-miR-487b-3p	canonical	other
mmu-miR-487b-3p-1-1-C	2636.5	-0.54	0.27	-1.97	0.0487	0.2229	non-significant	mmu-miR-487b-3p	ambiguous tail	C
mmu-miR-487b-3p-1-0--	1899.61	-0.28	0.28	-1.01	0.3124	0.5982	non-significant	mmu-miR-487b-3p	trimmed	other
mmu-miR-487b-3p-0-1-T	131.58	-0.37	0.26	-1.42	0.1545	0.4103	non-significant	mmu-miR-487b-3p	ambiguous tail	U
mmu-miR-487b-3p-2-0--	31.9	0.28	0.51	0.55	0.5856	0.8189	non-significant	mmu-miR-487b-3p	trimmed	other
mmu-miR-487b-3p-1-2-CT	24.4	-1.25	1.05	-1.19	0.2335	0.5151	non-significant	mmu-miR-487b-3p	ambiguous tail	other
mmu-miR-487b-3p-0-1-A	11.61	-3.89	2.17	-1.79	0.074		non-significant	mmu-miR-487b-3p	NT tail	A
mmu-miR-539-5p-0-0--	16.02	0.59	0.6	0.98	0.327		non-significant	mmu-miR-539-5p	canonical	other
mmu-miR-539-5p-0-1-T	13.39	0.85	0.72	1.18	0.2384		non-significant	mmu-miR-539-5p	ambiguous tail	U
mmu-miR-539-5p-1-0--	4.52	0.05	1.18	0.05	0.963		non-significant	mmu-miR-539-5p	trimmed	other
mmu-miR-544-5p-0-0--	8.76	-0.29	0.94	-0.31	0.7542		non-significant	mmu-miR-544-5p	canonical	other
mmu-miR-544-3p-1-1-T	18.53	0.48	0.8	0.6	0.5485	0.8016	non-significant	mmu-miR-544-3p	ambiguous tail	U
mmu-miR-544-3p-2-2-CT	17.31	0.15	0.8	0.18	0.8537	0.9403	non-significant	mmu-miR-544-3p	ambiguous tail	other
mmu-miR-382-5p-0-0--	364.03	0.53	0.27	1.97	0.0485	0.2229	non-significant	mmu-miR-382-5p	canonical	other
mmu-miR-382-5p-2-0--	45.29	0.81	0.54	1.49	0.135	0.3853	non-significant	mmu-miR-382-5p	trimmed	other
mmu-miR-382-5p-0-1-T	36.41	0.23	0.54	0.41	0.6793	0.874	non-significant	mmu-miR-382-5p	NT tail	U
mmu-miR-382-5p-1-0--	24.67	0.38	0.7	0.54	0.5885	0.8208	non-significant	mmu-miR-382-5p	trimmed	other
mmu-miR-382-5p-3-0--	17.27	0.24	0.71	0.34	0.734		non-significant	mmu-miR-382-5p	trimmed	other
mmu-miR-382-5p-1-1-T	5.99	0.52	0.95	0.55	0.5831		non-significant	mmu-miR-382-5p	ambiguous tail	U
mmu-miR-382-5p-0-1-A	3.27	-0.2	1.61	-0.12	0.9017		non-significant	mmu-miR-382-5p	NT tail	A
mmu-miR-134-5p-0-0--	206.96	-0.41	0.27	-1.5	0.1324	0.3824	non-significant	mmu-miR-134-5p	canonical	other
mmu-miR-134-5p-2-0--	55.25	-0.08	0.41	-0.21	0.8373	0.9336	non-significant	mmu-miR-134-5p	trimmed	other
mmu-miR-134-5p-1-0--	47.75	-0.14	0.38	-0.37	0.7088	0.8874	non-significant	mmu-miR-134-5p	trimmed	other
mmu-miR-134-5p-3-1-A	32.92	-0.9	0.51	-1.78	0.0753	0.2781	non-significant	mmu-miR-134-5p	ambiguous tail	A
mmu-miR-134-5p-0-1-T	21.81	0.08	0.52	0.15	0.8822	0.9606	non-significant	mmu-miR-134-5p	NT tail	U
mmu-miR-134-5p-1-1-T	15.06	-0.07	0.85	-0.08	0.9334		non-significant	mmu-miR-134-5p	ambiguous tail	U
mmu-miR-134-5p-3-2-AA	30.99	-0.27	0.55	-0.5	0.6146	0.841	non-significant	mmu-miR-134-5p	ambiguous tail	AA
mmu-miR-134-5p-3-1-T	15.59	0.62	0.65	0.96	0.3378		non-significant	mmu-miR-134-5p	ambiguous tail	U
mmu-miR-134-5p-3-3-AAT	8.9	0.15	0.9	0.16	0.8709		non-significant	mmu-miR-134-5p	ambiguous tail	AAU
mmu-miR-134-5p-2-1-T	6.65	-0.01	1	-0.01	0.995		non-significant	mmu-miR-134-5p	ambiguous tail	U
mmu-miR-134-5p-3-0--	5.28	0.64	1.2	0.54	0.5919		non-significant	mmu-miR-134-5p	trimmed	other
mmu-miR-134-5p-1-2-TT	6.15	-0.65	0.98	-0.66	0.5082		non-significant	mmu-miR-134-5p	ambiguous tail	UU
mmu-miR-134-5p-1-1-A	16.2	-1.47	0.91	-1.62	0.1055		non-significant	mmu-miR-134-5p	ambiguous tail	A
mmu-miR-134-5p-0-1-A	14.9	-1.73	0.9	-1.92	0.0548		non-significant	mmu-miR-134-5p	NT tail	A
mmu-miR-134-5p-2-1-A	5.06	-0.07	0.95	-0.07	0.9453		non-significant	mmu-miR-134-5p	ambiguous tail	A
mmu-miR-134-5p-1-2-AA	8.27	-1.38	1.58	-0.88	0.3809		non-significant	mmu-miR-134-5p	ambiguous tail	AA
mmu-miR-134-5p-1-3-ATT	3.45	-3.13	1.8	-1.74	0.0813		non-significant	mmu-miR-134-5p	ambiguous tail	AUU
mmu-miR-134-5p-1-2-AT	5.66	-1.25	1.31	-0.95	0.3414		non-significant	mmu-miR-134-5p	ambiguous tail	AU
mmu-miR-134-5p-3-2-TT	2.08	-1.26	1.69	-0.75	0.4558		non-significant	mmu-miR-134-5p	ambiguous tail	UU
mmu-miR-134-5p-0-2-AA	2.41	-2.66	2.09	-1.28	0.2016		non-significant	mmu-miR-134-5p	NT tail	AA
mmu-miR-134-5p-1-3-AAT	5.56	-3.69	1.9	-1.94	0.0523		non-significant	mmu-miR-134-5p	ambiguous tail	AAU
mmu-miR-134-5p-3-2-AT	1.08	0.55	1.96	0.28	0.7787		non-significant	mmu-miR-134-5p	ambiguous tail	AU
mmu-miR-134-3p-0-0--	59.43	-0.7	0.36	-1.96	0.0497	0.226	non-significant	mmu-miR-134-3p	canonical	other
mmu-miR-134-3p-0-1-A	16.23	-1.17	0.78	-1.51	0.1311		non-significant	mmu-miR-134-3p	ambiguous tail	A
mmu-miR-134-3p-0-3-ATT	5.96	-1.24	1.5	-0.83	0.4088		non-significant	mmu-miR-134-3p	NT tail	AUU
mmu-miR-668-3p-0-0--	1734.26	-0.83	0.48	-1.75	0.0797	0.2866	non-significant	mmu-miR-668-3p	canonical	other
mmu-miR-668-3p-3-0--	1444.79	-0.76	0.31	-2.48	0.013	0.0985	non-significant	mmu-miR-668-3p	trimmed	other
mmu-miR-668-3p-1-0--	291.51	-0.58	0.45	-1.29	0.1977	0.4698	non-significant	mmu-miR-668-3p	trimmed	other
mmu-miR-668-3p-0-1-C	165.46	-1.36	0.53	-2.58	0.01	0.0835	non-significant	mmu-miR-668-3p	ambiguous tail	C
mmu-miR-668-3p-0-1-T	109.06	-0.87	0.56	-1.55	0.1216	0.364	non-significant	mmu-miR-668-3p	NT tail	U
mmu-miR-668-3p-0-2-CT	74.12	-1.12	0.61	-1.82	0.0684	0.2669	non-significant	mmu-miR-668-3p	NT tail	other
mmu-miR-668-3p-1-1-T	68.99	-0.95	0.54	-1.76	0.078	0.2831	non-significant	mmu-miR-668-3p	ambiguous tail	U
mmu-miR-668-3p-2-0--	55.11	-1.04	0.46	-2.26	0.0237	0.145	non-significant	mmu-miR-668-3p	trimmed	other
mmu-miR-668-3p-2-1-T	15.27	-1.2	0.8	-1.51	0.1319		non-significant	mmu-miR-668-3p	ambiguous tail	U
mmu-miR-485-5p-0-0--	345.38	-0.05	0.29	-0.18	0.8552	0.9404	non-significant	mmu-miR-485-5p	canonical	other
mmu-miR-485-5p-0-2-GT	68.8	-0.21	0.64	-0.34	0.7369	0.8989	non-significant	mmu-miR-485-5p	NT tail	other
mmu-miR-485-5p-1-0--	75.14	-0.29	0.49	-0.6	0.5482	0.8016	non-significant	mmu-miR-485-5p	trimmed	other
mmu-miR-485-5p-0-1-G	81.09	-0.3	0.65	-0.47	0.6412	0.8572	non-significant	mmu-miR-485-5p	ambiguous tail	G
mmu-miR-485-5p-2-0--	39.25	0.04	0.52	0.07	0.9419	0.9784	non-significant	mmu-miR-485-5p	trimmed	other
mmu-miR-485-5p-0-1-T	21.03	-0.75	0.77	-0.97	0.3312	0.6146	non-significant	mmu-miR-485-5p	NT tail	U
mmu-miR-485-5p-0-3-GTT	1.84	-1.75	2.09	-0.84	0.4023		non-significant	mmu-miR-485-5p	NT tail	other
mmu-miR-485-5p-0-3-GAT	7.06	0.15	1	0.15	0.8771		non-significant	mmu-miR-485-5p	ambiguous tail	other
mmu-miR-485-5p-0-1-A	11.73	-3.22	1.26	-2.56	0.0105		non-significant	mmu-miR-485-5p	NT tail	A
mmu-miR-485-5p-0-2-GA	5.17	-1.89	1.43	-1.32	0.1879		non-significant	mmu-miR-485-5p	ambiguous tail	other
mmu-miR-485-3p-0-1-T	43.81	-0.23	0.4	-0.56	0.5723	0.8158	non-significant	mmu-miR-485-3p	ambiguous tail	U
mmu-miR-485-3p-0-1-C	10.5	0.48	0.94	0.51	0.6081		non-significant	mmu-miR-485-3p	NT tail	C
mmu-miR-154-5p-0-0--	121.68	-0.68	0.49	-1.4	0.1613	0.4188	non-significant	mmu-miR-154-5p	canonical	other
mmu-miR-154-5p-3-0--	9.71	-0.99	0.94	-1.05	0.2932		non-significant	mmu-miR-154-5p	trimmed	other
mmu-miR-154-5p-0-1-T	11.91	-0.93	0.72	-1.3	0.1921		non-significant	mmu-miR-154-5p	NT tail	U
mmu-miR-154-5p-1-0--	4.25	0.02	1.49	0.01	0.9911		non-significant	mmu-miR-154-5p	trimmed	other
mmu-miR-154-5p-0-1-A	1.24	-2.2	3.23	-0.68	0.4959		non-significant	mmu-miR-154-5p	NT tail	A
mmu-miR-154-3p-0-0--	11.99	-0.5	0.87	-0.58	0.5624		non-significant	mmu-miR-154-3p	canonical	other
mmu-miR-496a-3p-0-0--	100.43	0.02	0.36	0.05	0.9605	0.9841	non-significant	mmu-miR-496a-3p	canonical	other
mmu-miR-496a-3p-1-0--	94.65	-0.05	0.4	-0.12	0.9034	0.9682	non-significant	mmu-miR-496a-3p	trimmed	other
mmu-miR-496a-3p-0-1-T	2.84	0.37	1.55	0.24	0.8105		non-significant	mmu-miR-496a-3p	NT tail	U
mmu-miR-377-5p-1-0--	47.57	-1.03	0.41	-2.5	0.0123	0.0957	non-significant	mmu-miR-377-5p	trimmed	other
mmu-miR-377-5p-0-0--	41.67	-0.59	0.46	-1.28	0.2021	0.4734	non-significant	mmu-miR-377-5p	canonical	other
mmu-miR-377-5p-2-0--	8.85	-1.26	1.11	-1.14	0.256		non-significant	mmu-miR-377-5p	trimmed	other
mmu-miR-377-5p-0-1-G	2.95	-0.45	1.67	-0.27	0.7894		non-significant	mmu-miR-377-5p	ambiguous tail	G
mmu-miR-377-3p-0-0--	8.06	0.32	0.94	0.34	0.7309		non-significant	mmu-miR-377-3p	canonical	other
mmu-miR-377-3p-1-0--	3.7	0.02	1.31	0.01	0.9895		non-significant	mmu-miR-377-3p	trimmed	other
mmu-miR-541-5p-0-0--	28365.4	0.14	0.27	0.51	0.6099	0.8382	non-significant	mmu-miR-541-5p	canonical	other
mmu-miR-541-5p-2-0--	10199.7	0.63	0.15	4.17	0	0.0018	non-significant	mmu-miR-541-5p	trimmed	other
mmu-miR-541-5p-1-0--	8440.96	0.6	0.2	3.08	0.0021	0.0305	non-significant	mmu-miR-541-5p	trimmed	other
mmu-miR-541-5p-3-0--	2602.61	0.75	0.26	2.86	0.0042	0.0474	non-significant	mmu-miR-541-5p	trimmed	other
mmu-miR-541-5p-0-1-C	2916.77	0.59	0.19	3.12	0.0018	0.0276	non-significant	mmu-miR-541-5p	ambiguous tail	C
mmu-miR-541-5p-3-1-T	1002.94	0.55	0.2	2.72	0.0066	0.0635	non-significant	mmu-miR-541-5p	ambiguous tail	U
mmu-miR-541-5p-0-1-T	766.42	-0.04	0.32	-0.12	0.9017	0.9675	non-significant	mmu-miR-541-5p	NT tail	U
mmu-miR-541-5p-0-2-CT	650.08	0.3	0.18	1.64	0.1016	0.3306	non-significant	mmu-miR-541-5p	NT tail	other
mmu-miR-541-5p-0-2-TT	286.21	0.58	0.25	2.3	0.0214	0.1364	non-significant	mmu-miR-541-5p	NT tail	UU
mmu-miR-541-5p-4-1-T	301.49	0.03	0.34	0.1	0.9224	0.9745	non-significant	mmu-miR-541-5p	ambiguous tail	U
mmu-miR-541-5p-0-3-CTT	101.37	0.09	0.31	0.28	0.7791	0.9082	non-significant	mmu-miR-541-5p	NT tail	other
mmu-miR-541-5p-1-1-G	143.19	1.37	0.41	3.36	0.0008	0.0171	significant	mmu-miR-541-5p	ambiguous tail	G
mmu-miR-541-5p-1-1-A	243.97	-0.51	0.51	-0.98	0.3254	0.6129	non-significant	mmu-miR-541-5p	ambiguous tail	A
mmu-miR-541-5p-2-1-T	63.92	-0.65	0.46	-1.43	0.153	0.407	non-significant	mmu-miR-541-5p	ambiguous tail	U
mmu-miR-541-5p-4-2-TT	44.43	0.2	0.38	0.52	0.6027	0.833	non-significant	mmu-miR-541-5p	ambiguous tail	UU
mmu-miR-541-5p-3-2-TT	47.08	0.55	0.51	1.1	0.2723	0.5601	non-significant	mmu-miR-541-5p	ambiguous tail	UU
mmu-miR-541-5p-2-2-TT	26.05	-0.62	0.7	-0.89	0.3732	0.6546	non-significant	mmu-miR-541-5p	ambiguous tail	UU
mmu-miR-541-5p-0-1-A	28.11	-4.19	2.14	-1.96	0.0503	0.2263	non-significant	mmu-miR-541-5p	NT tail	A
mmu-miR-541-5p-2-1-A	18.44	-0.2	1.08	-0.18	0.8538	0.9403	non-significant	mmu-miR-541-5p	ambiguous tail	A
mmu-miR-541-5p-0-2-AT	60	-4.61	1.6	-2.88	0.004	0.0458	significant	mmu-miR-541-5p	NT tail	AU
mmu-miR-541-5p-0-2-CA	41.65	0.82	2.86	0.29	0.7752	0.9082	non-significant	mmu-miR-541-5p	NT tail	other
mmu-miR-541-5p-2-2-AT	20.67	-1.51	1.59	-0.95	0.3422	0.6252	non-significant	mmu-miR-541-5p	ambiguous tail	AU
mmu-miR-541-5p-4-1-A	9.11	-3.99	1.96	-2.04	0.0413		non-significant	mmu-miR-541-5p	ambiguous tail	A
mmu-miR-541-3p-0-0--	5.01	-1.95	1.24	-1.58	0.114		non-significant	mmu-miR-541-3p	canonical	other
mmu-miR-409-5p-0-0--	1063.1	1.25	0.67	1.87	0.0614	0.2545	non-significant	mmu-miR-409-5p	canonical	other
mmu-miR-409-5p-2-0--	124.83	0.74	0.7	1.05	0.2919	0.5793	non-significant	mmu-miR-409-5p	trimmed	other
mmu-miR-409-5p-1-0--	107.65	1.56	0.84	1.85	0.0642	0.2592	non-significant	mmu-miR-409-5p	trimmed	other
mmu-miR-409-5p-0-1-C	60.06	1.54	0.69	2.24	0.0249	0.1472	non-significant	mmu-miR-409-5p	ambiguous tail	C
mmu-miR-409-5p-0-2-CT	29.72	0.03	0.57	0.05	0.9635	0.985	non-significant	mmu-miR-409-5p	ambiguous tail	other
mmu-miR-409-5p-1-1-A	13.06	1	1.12	0.89	0.3716		non-significant	mmu-miR-409-5p	ambiguous tail	A
mmu-miR-409-3p-0-0--	2955.2	-0.19	0.28	-0.68	0.4983	0.7594	non-significant	mmu-miR-409-3p	canonical	other
mmu-miR-409-3p-1-0--	88.73	0.06	0.41	0.13	0.8939	0.9673	non-significant	mmu-miR-409-3p	trimmed	other
mmu-miR-409-3p-2-0--	47.3	0.84	0.45	1.87	0.0611	0.2545	non-significant	mmu-miR-409-3p	trimmed	other
mmu-miR-409-3p-1-1-G	46.26	1.35	0.41	3.26	0.0011	0.0204	significant	mmu-miR-409-3p	ambiguous tail	G
mmu-miR-409-3p-0-1-T	16.56	-0.49	0.7	-0.7	0.4813		non-significant	mmu-miR-409-3p	ambiguous tail	U
mmu-miR-409-3p-2-1-T	18.36	0.31	0.77	0.4	0.6888	0.8778	non-significant	mmu-miR-409-3p	ambiguous tail	U
mmu-miR-409-3p-0-2-TT	6.1	-3.64	1.61	-2.25	0.0242		non-significant	mmu-miR-409-3p	ambiguous tail	UU
mmu-miR-409-3p-3-0--	9.09	0.57	0.76	0.75	0.4511		non-significant	mmu-miR-409-3p	trimmed	other
mmu-miR-412-5p-3-0--	709.53	-0.49	0.3	-1.64	0.1007	0.3282	non-significant	mmu-miR-412-5p	trimmed	other
mmu-miR-412-5p-2-0--	534.81	0.29	0.27	1.06	0.2909	0.5778	non-significant	mmu-miR-412-5p	trimmed	other
mmu-miR-412-5p-0-0--	202.84	0.15	0.32	0.48	0.6297	0.8506	non-significant	mmu-miR-412-5p	canonical	other
mmu-miR-412-5p-3-1-T	71.28	0.33	0.4	0.81	0.416	0.7006	non-significant	mmu-miR-412-5p	ambiguous tail	U
mmu-miR-412-5p-1-0--	10.05	-0.9	1.01	-0.9	0.3706		non-significant	mmu-miR-412-5p	trimmed	other
mmu-miR-369-5p-1-0--	233.46	-0.22	0.24	-0.93	0.3515	0.6323	non-significant	mmu-miR-369-5p	trimmed	other
mmu-miR-369-5p-0-0--	121.16	-0.03	0.3	-0.11	0.9089	0.9694	non-significant	mmu-miR-369-5p	canonical	other
mmu-miR-369-5p-2-0--	47.83	-0.62	0.42	-1.47	0.1404	0.3892	non-significant	mmu-miR-369-5p	trimmed	other
mmu-miR-369-5p-0-1-T	21.75	-0.43	0.6	-0.72	0.4698	0.7429	non-significant	mmu-miR-369-5p	ambiguous tail	U
mmu-miR-369-5p-0-1-A	7.74	-0.63	0.99	-0.64	0.5218		non-significant	mmu-miR-369-5p	NT tail	A
mmu-miR-369-5p-3-0--	9.54	-0.01	0.91	-0.01	0.9912		non-significant	mmu-miR-369-5p	trimmed	other
mmu-miR-369-5p-1-1-A	0.97	0.41	2.31	0.18	0.8601		non-significant	mmu-miR-369-5p	ambiguous tail	A
mmu-miR-369-3p-0-0--	363.08	0.22	0.47	0.46	0.6431	0.8584	non-significant	mmu-miR-369-3p	canonical	other
mmu-miR-369-3p-1-0--	197.09	0.68	0.42	1.6	0.1099	0.3452	non-significant	mmu-miR-369-3p	trimmed	other
mmu-miR-369-3p-1-1-A	53.63	0.45	0.49	0.92	0.3561	0.6379	non-significant	mmu-miR-369-3p	ambiguous tail	A
mmu-miR-369-3p-0-1-T	14.34	0.26	0.82	0.32	0.7491		non-significant	mmu-miR-369-3p	ambiguous tail	U
mmu-miR-369-3p-2-0--	10.01	0.22	0.99	0.22	0.8272		non-significant	mmu-miR-369-3p	trimmed	other
mmu-miR-410-3p-0-0--	13323.5	0.06	0.22	0.28	0.7766	0.9082	non-significant	mmu-miR-410-3p	canonical	other
mmu-miR-410-3p-1-0--	2983.55	0.14	0.22	0.63	0.5271	0.7842	non-significant	mmu-miR-410-3p	trimmed	other
mmu-miR-410-3p-3-0--	133.93	0.22	0.37	0.59	0.5531	0.8041	non-significant	mmu-miR-410-3p	trimmed	other
mmu-miR-410-3p-1-1-G	114.83	1.21	0.37	3.24	0.0012	0.0208	significant	mmu-miR-410-3p	ambiguous tail	G
mmu-miR-410-3p-1-1-A	93.85	0.39	0.34	1.16	0.2458	0.5307	non-significant	mmu-miR-410-3p	ambiguous tail	A
mmu-miR-410-3p-1-1-C	58.32	0.38	0.5	0.76	0.4501	0.7297	non-significant	mmu-miR-410-3p	ambiguous tail	C
mmu-miR-410-3p-0-1-T	47.75	0.08	0.5	0.16	0.8699	0.9509	non-significant	mmu-miR-410-3p	ambiguous tail	U
mmu-miR-410-3p-3-2-GG	100.24	1.51	0.46	3.27	0.0011	0.0204	significant	mmu-miR-410-3p	ambiguous tail	other
mmu-miR-3072-3p-0-0--	52.39	-1.51	0.65	-2.33	0.0197	0.1305	non-significant	mmu-miR-3072-3p	canonical	other
mmu-miR-3072-3p-0-1-T	3.64	-2.57	1.53	-1.67	0.0946		non-significant	mmu-miR-3072-3p	ambiguous tail	U
mmu-miR-1247-3p-0-0--	6.25	-0.04	1.16	-0.04	0.9718		non-significant	mmu-miR-1247-3p	canonical	other
mmu-miR-1247-5p-0-1-T	213.18	-1.52	0.81	-1.87	0.0615	0.2545	non-significant	mmu-miR-1247-5p	NT tail	U
mmu-miR-1247-5p-1-0--	102.46	-1.11	0.84	-1.33	0.185	0.4513	non-significant	mmu-miR-1247-5p	trimmed	other
mmu-miR-1247-5p-2-0--	70.48	-1.23	0.64	-1.93	0.0541	0.2387	non-significant	mmu-miR-1247-5p	trimmed	other
mmu-miR-1247-5p-0-2-TT	89.3	-0.89	0.6	-1.48	0.1389	0.3878	non-significant	mmu-miR-1247-5p	NT tail	UU
mmu-miR-1247-5p-0-0--	31.44	-1.6	0.97	-1.66	0.0978	0.3229	non-significant	mmu-miR-1247-5p	canonical	other
mmu-miR-1247-5p-0-1-A	22.37	-1.83	0.86	-2.13	0.0334	0.1784	non-significant	mmu-miR-1247-5p	NT tail	A
mmu-miR-1247-5p-0-1-C	19.19	-1.46	0.67	-2.2	0.0279	0.1572	non-significant	mmu-miR-1247-5p	NT tail	C
mmu-miR-1247-5p-0-2-CT	12.49	-1.43	0.85	-1.68	0.0929		non-significant	mmu-miR-1247-5p	NT tail	other
mmu-miR-1247-5p-0-2-TA	4.28	-3.5	1.46	-2.39	0.0167		non-significant	mmu-miR-1247-5p	NT tail	UA
mmu-miR-203-3p-0-1-T	18.14	0.22	0.76	0.29	0.7681	0.9079	non-significant	mmu-miR-203-3p	NT tail	U
mmu-miR-203-3p-2-0--	17.98	0.15	0.75	0.2	0.8439	0.9365	non-significant	mmu-miR-203-3p	trimmed	other
mmu-miR-203-3p-0-0--	22.17	-0.52	0.78	-0.66	0.5081	0.7666	non-significant	mmu-miR-203-3p	canonical	other
mmu-miR-203-3p-0-1-A	26.89	0.49	0.83	0.59	0.553	0.8041	non-significant	mmu-miR-203-3p	ambiguous tail	A
mmu-miR-153-5p-0-0--	4.11	-0.53	1.08	-0.49	0.6253		non-significant	mmu-miR-153-5p	canonical	other
mmu-miR-153-5p-0-1-T	2.85	-1.91	1.84	-1.04	0.2995		non-significant	mmu-miR-153-5p	NT tail	U
mmu-miR-153-3p-0-0--	2140.08	-0.05	0.35	-0.14	0.8923	0.9666	non-significant	mmu-miR-153-3p	canonical	other
mmu-miR-153-3p-1-0--	61.04	-0.1	0.44	-0.23	0.8147	0.9276	non-significant	mmu-miR-153-3p	trimmed	other
mmu-miR-153-3p-1-1-A	37.16	-0.4	0.59	-0.68	0.4983	0.7594	non-significant	mmu-miR-153-3p	ambiguous tail	A
mmu-miR-153-3p-1-1-G	25.37	0.29	0.72	0.4	0.6865	0.876	non-significant	mmu-miR-153-3p	ambiguous tail	G
mmu-miR-153-3p-0-2-AT	24.07	-0.32	0.85	-0.38	0.7033	0.8871	non-significant	mmu-miR-153-3p	ambiguous tail	AU
mmu-miR-153-3p-0-1-A	7.45	0.11	1.24	0.09	0.9321		non-significant	mmu-miR-153-3p	ambiguous tail	A
mmu-miR-153-3p-2-0--	7.25	-0.22	0.98	-0.22	0.8248		non-significant	mmu-miR-153-3p	trimmed	other
mmu-miR-1983-0-0--	168.91	-0.03	0.43	-0.08	0.9353	0.9745	non-significant	mmu-miR-1983	canonical	other
mmu-miR-1983-1-1-C	97.67	-0.02	0.29	-0.06	0.9493	0.9804	non-significant	mmu-miR-1983	ambiguous tail	C
mmu-miR-1983-1-0--	31.86	0.55	0.56	0.98	0.3269	0.6135	non-significant	mmu-miR-1983	trimmed	other
mmu-miR-1983-1-1-A	38.39	0.04	0.45	0.09	0.9318	0.9745	non-significant	mmu-miR-1983	ambiguous tail	A
mmu-miR-1983-1-2-CA	11.32	-0.02	0.69	-0.02	0.982		non-significant	mmu-miR-1983	ambiguous tail	other
mmu-miR-1983-0-1-T	11.84	0.43	0.98	0.43	0.665		non-significant	mmu-miR-1983	NT tail	U
mmu-miR-1983-1-2-CT	12.44	0.83	0.86	0.96	0.3388		non-significant	mmu-miR-1983	ambiguous tail	other
mmu-miR-1983-2-0--	7.25	-3.17	1.35	-2.36	0.0184		non-significant	mmu-miR-1983	trimmed	other
mmu-miR-1983-0-1-C	6.8	0.68	1.01	0.68	0.4993		non-significant	mmu-miR-1983	NT tail	C
mmu-miR-1983-2-3-TTT	2.11	0.25	1.59	0.15	0.8769		non-significant	mmu-miR-1983	ambiguous tail	UUU
mmu-miR-1983-2-3-ACT	6.95	-1.16	1.03	-1.13	0.2564		non-significant	mmu-miR-1983	ambiguous tail	other
mmu-miR-1983-2-3-ACC	4.26	-0.38	1.31	-0.29	0.7708		non-significant	mmu-miR-1983	ambiguous tail	other
mmu-let-7d-3p-0-0--	2265.62	-0.57	0.32	-1.77	0.0768	0.2819	non-significant	mmu-let-7d-3p	canonical	other
mmu-let-7d-3p-1-0--	164.49	-0.27	0.33	-0.83	0.4093	0.6929	non-significant	mmu-let-7d-3p	trimmed	other
mmu-let-7d-3p-1-1-C	63.49	-0.3	0.57	-0.52	0.6008	0.8322	non-significant	mmu-let-7d-3p	ambiguous tail	C
mmu-let-7d-3p-2-0--	35.29	-0.29	0.51	-0.57	0.5673	0.8126	non-significant	mmu-let-7d-3p	trimmed	other
mmu-let-7d-3p-1-1-A	57.47	-0.48	0.49	-0.98	0.3261	0.6129	non-significant	mmu-let-7d-3p	ambiguous tail	A
mmu-let-7d-3p-0-1-T	14.25	-0.56	0.71	-0.8	0.4261		non-significant	mmu-let-7d-3p	NT tail	U
mmu-let-7d-5p-0-0--	5823.9	0.36	0.22	1.67	0.0947	0.3169	non-significant	mmu-let-7d-5p	canonical	other
mmu-let-7d-5p-1-0--	2020.81	0.49	0.31	1.56	0.1198	0.3614	non-significant	mmu-let-7d-5p	trimmed	other
mmu-let-7d-5p-0-1-T	539.93	0.14	0.23	0.61	0.5435	0.7971	non-significant	mmu-let-7d-5p	NT tail	U
mmu-let-7d-5p-7-7-TATGGTT	93	-1.18	0.57	-2.07	0.0384	0.1936	non-significant	mmu-let-7d-5p	ambiguous tail	other
mmu-let-7d-5p-2-0--	186.65	0.8	0.46	1.75	0.0803	0.2884	non-significant	mmu-let-7d-5p	trimmed	other
mmu-let-7d-5p-0-1-A	90.42	-0.14	0.47	-0.29	0.7747	0.9082	non-significant	mmu-let-7d-5p	NT tail	A
mmu-let-7f-1-3p-1-1-T	72.73	-0.39	0.4	-0.98	0.3293	0.6137	non-significant	mmu-let-7f-1-3p	ambiguous tail	U
mmu-let-7f-5p-1-2-0-0--	46220.8	1.28	0.38	3.41	0.0006	0.0154	significant	mmu-let-7f-5p-1-2	canonical	other
mmu-let-7f-5p-1-2-1-0--	18189.8	1.51	0.38	3.96	0.0001	0.0035	significant	mmu-let-7f-5p-1-2	trimmed	other
mmu-let-7f-5p-1-2-0-1-T	7696.54	1.52	0.25	6.13	0	0	significant	mmu-let-7f-5p-1-2	NT tail	U
mmu-let-7f-5p-1-2-2-0--	1380.04	1.62	0.38	4.26	0	0.0015	significant	mmu-let-7f-5p-1-2	trimmed	other
mmu-let-7f-5p-1-2-0-1-A	1203.64	1.01	0.26	3.87	0.0001	0.0047	significant	mmu-let-7f-5p-1-2	NT tail	A
mmu-let-7f-5p-1-2-3-0--	172	1.68	0.32	5.27	0	0	significant	mmu-let-7f-5p-1-2	trimmed	other
mmu-let-7f-5p-1-2-1-1-A	111.92	0.81	0.44	1.85	0.0644	0.2593	non-significant	mmu-let-7f-5p-1-2	ambiguous tail	A
mmu-let-7f-5p-1-2-0-1-G	74.88	0.84	0.57	1.46	0.1434	0.3917	non-significant	mmu-let-7f-5p-1-2	NT tail	G
mmu-let-7f-5p-1-2-0-1-C	41.25	1.04	0.52	1.99	0.0465	0.2182	non-significant	mmu-let-7f-5p-1-2	NT tail	C
mmu-let-7f-5p-1-2-0-2-TT	37.98	1.43	0.45	3.17	0.0015	0.0252	significant	mmu-let-7f-5p-1-2	NT tail	UU
mmu-let-7f-5p-1-2-0-2-AT	18.01	0.08	1.6	0.05	0.9582	0.9834	non-significant	mmu-let-7f-5p-1-2	NT tail	AU
mmu-let-7f-5p-1-2-1-1-C	44.42	1.97	0.58	3.37	0.0007	0.0164	significant	mmu-let-7f-5p-1-2	ambiguous tail	C
mmu-let-7a-1-3p-7c-2-3p-1-1-T	154.81	0.54	0.36	1.49	0.1361	0.3861	non-significant	mmu-let-7a-1-3p-7c-2-3p	ambiguous tail	U
mmu-let-7a-1-3p-7c-2-3p-0-0--	70.14	0.02	0.39	0.05	0.9601	0.9841	non-significant	mmu-let-7a-1-3p-7c-2-3p	canonical	other
mmu-let-7a-1-3p-7c-2-3p-0-1-T	30.32	0.35	0.44	0.81	0.4182	0.7024	non-significant	mmu-let-7a-1-3p-7c-2-3p	NT tail	U
mmu-let-7a-1-3p-7c-2-3p-1-0--	14.58	0.47	0.95	0.5	0.6193		non-significant	mmu-let-7a-1-3p-7c-2-3p	trimmed	other
mmu-miR-6943-3p-0-1-T	1.01	-1.77	3.43	-0.52	0.6056		non-significant	mmu-miR-6943-3p	NT tail	U
mmu-miR-6944-3p-0-1-T	1243.64	-0.93	0.42	-2.2	0.028	0.1572	non-significant	mmu-miR-6944-3p	NT tail	U
mmu-miR-6944-3p-0-0--	404.18	-0.65	0.52	-1.25	0.2113	0.4832	non-significant	mmu-miR-6944-3p	canonical	other
mmu-miR-6944-3p-0-1-A	158.1	-1.46	0.52	-2.84	0.0045	0.0506	non-significant	mmu-miR-6944-3p	NT tail	A
mmu-miR-6944-3p-1-0--	62.45	-0.93	0.49	-1.88	0.0596	0.2516	non-significant	mmu-miR-6944-3p	trimmed	other
mmu-miR-6944-3p-0-2-TT	26.91	-0.47	0.67	-0.71	0.4786	0.7476	non-significant	mmu-miR-6944-3p	NT tail	UU
mmu-miR-6944-3p-2-0--	33.39	-1.37	0.52	-2.62	0.0089	0.079	non-significant	mmu-miR-6944-3p	trimmed	other
mmu-miR-6944-3p-0-1-C	5.75	-1.28	1.24	-1.03	0.3009		non-significant	mmu-miR-6944-3p	NT tail	C
mmu-miR-6944-3p-3-0--	11.44	0.11	0.85	0.13	0.898		non-significant	mmu-miR-6944-3p	trimmed	other
mmu-miR-6944-3p-0-2-TA	9.84	-0.75	1.66	-0.45	0.6522		non-significant	mmu-miR-6944-3p	NT tail	UA
mmu-miR-6944-3p-0-2-AA	6.55	-0.74	0.96	-0.77	0.4397		non-significant	mmu-miR-6944-3p	NT tail	AA
mmu-miR-6944-3p-1-1-T	7.08	-0.79	1.29	-0.61	0.5386		non-significant	mmu-miR-6944-3p	ambiguous tail	U
mmu-miR-6945-3p-0-0--	3.13	-0.43	1.55	-0.27	0.7838		non-significant	mmu-miR-6945-3p	canonical	other
mmu-miR-874-3p-0-1-C	1503.31	-1	0.39	-2.57	0.01	0.0835	non-significant	mmu-miR-874-3p	NT tail	C
mmu-miR-874-3p-0-2-CT	860.14	-1.06	0.47	-2.27	0.0232	0.1427	non-significant	mmu-miR-874-3p	NT tail	other
mmu-miR-874-3p-0-0--	440.69	-1.03	0.35	-2.99	0.0028	0.0357	significant	mmu-miR-874-3p	canonical	other
mmu-miR-874-3p-0-2-CA	234.43	-1.6	0.47	-3.42	0.0006	0.0154	significant	mmu-miR-874-3p	NT tail	other
mmu-miR-874-3p-0-1-T	149.01	-1.18	0.4	-2.93	0.0034	0.0417	significant	mmu-miR-874-3p	NT tail	U
mmu-miR-874-3p-1-1-T	53.36	-0.74	0.51	-1.43	0.1516	0.407	non-significant	mmu-miR-874-3p	ambiguous tail	U
mmu-miR-874-3p-0-2-TT	45.07	-0.71	0.54	-1.32	0.186	0.4527	non-significant	mmu-miR-874-3p	NT tail	UU
mmu-miR-874-3p-0-3-CTT	30.25	-1.5	0.66	-2.28	0.0225	0.1397	non-significant	mmu-miR-874-3p	NT tail	other
mmu-miR-874-3p-0-2-CC	23.67	-1.3	0.65	-2.01	0.0449	0.2128	non-significant	mmu-miR-874-3p	NT tail	other
mmu-miR-874-3p-1-1-G	16.15	0.63	0.67	0.94	0.345		non-significant	mmu-miR-874-3p	ambiguous tail	G
mmu-miR-874-3p-0-3-CAT	15.48	-1.25	0.85	-1.47	0.141		non-significant	mmu-miR-874-3p	NT tail	other
mmu-miR-874-3p-0-1-A	27.73	-0.74	1.29	-0.58	0.5643	0.8113	non-significant	mmu-miR-874-3p	NT tail	A
mmu-miR-874-3p-3-0--	12.15	-0.74	0.83	-0.89	0.3741		non-significant	mmu-miR-874-3p	trimmed	other
mmu-miR-874-3p-0-2-TA	7.69	-4.63	1.36	-3.39	0.0007		non-significant	mmu-miR-874-3p	NT tail	UA
mmu-miR-874-3p-0-2-CG	11.09	-1.41	1.3	-1.08	0.2781		non-significant	mmu-miR-874-3p	NT tail	other
mmu-miR-874-3p-0-2-AT	11.96	-2.79	1.52	-1.84	0.0661		non-significant	mmu-miR-874-3p	NT tail	AU
mmu-miR-874-5p-0-0--	89.11	-0.4	0.43	-0.92	0.3561	0.6379	non-significant	mmu-miR-874-5p	canonical	other
mmu-miR-874-5p-0-1-A	60.54	-1.19	0.57	-2.1	0.0355	0.1849	non-significant	mmu-miR-874-5p	NT tail	A
mmu-miR-874-5p-0-1-T	13.57	-0.87	0.86	-1.02	0.309		non-significant	mmu-miR-874-5p	NT tail	U
mmu-miR-874-5p-2-0--	8.33	-0.35	1.06	-0.33	0.7413		non-significant	mmu-miR-874-5p	trimmed	other
mmu-miR-7a-1-3p-0-0--	92.16	-0.12	0.55	-0.21	0.8299	0.9333	non-significant	mmu-miR-7a-1-3p	canonical	other
mmu-miR-7a-1-3p-1-1-T	36.8	0.15	0.45	0.33	0.7402	0.8989	non-significant	mmu-miR-7a-1-3p	ambiguous tail	U
mmu-miR-7a-1-3p-1-0--	25.9	-0.52	0.51	-1.03	0.305	0.5934	non-significant	mmu-miR-7a-1-3p	trimmed	other
mmu-miR-7a-1-3p-3-0--	18.64	0.54	0.75	0.72	0.4685	0.7429	non-significant	mmu-miR-7a-1-3p	trimmed	other
mmu-miR-7a-1-3p-0-1-T	6.71	-0.43	1.03	-0.42	0.6763		non-significant	mmu-miR-7a-1-3p	NT tail	U
mmu-miR-7a-1-3p-2-0--	5.83	0.34	1.48	0.23	0.8164		non-significant	mmu-miR-7a-1-3p	trimmed	other
mmu-miR-7a-5p-1-2-0-1-T	4608.77	0.64	0.29	2.2	0.0282	0.1572	non-significant	mmu-miR-7a-5p-1-2	NT tail	U
mmu-miR-7a-5p-1-2-0-0--	1508.17	0.66	0.37	1.79	0.074	0.2771	non-significant	mmu-miR-7a-5p-1-2	canonical	other
mmu-miR-7a-5p-1-2-2-0--	173.66	1.15	0.45	2.57	0.0103	0.0846	non-significant	mmu-miR-7a-5p-1-2	trimmed	other
mmu-miR-7a-5p-1-2-1-0--	92.86	0.57	0.37	1.55	0.1207	0.362	non-significant	mmu-miR-7a-5p-1-2	trimmed	other
mmu-miR-7a-5p-1-2-3-0--	55	1.4	0.66	2.12	0.0338	0.1792	non-significant	mmu-miR-7a-5p-1-2	trimmed	other
mmu-miR-7a-5p-1-2-2-1-T	15.43	1.63	0.64	2.56	0.0105		non-significant	mmu-miR-7a-5p-1-2	ambiguous tail	U
mmu-miR-7a-5p-1-2-0-2-TA	7.78	-3.51	2.51	-1.4	0.1626		non-significant	mmu-miR-7a-5p-1-2	NT tail	UA
mmu-miR-27b-5p-0-0--	31.7	1.04	0.45	2.33	0.02	0.132	non-significant	mmu-miR-27b-5p	canonical	other
mmu-miR-27b-5p-0-3-AGT	3.87	-0.74	1.19	-0.62	0.5347		non-significant	mmu-miR-27b-5p	ambiguous tail	other
mmu-miR-27b-5p-0-1-T	8.16	-0.24	1.01	-0.24	0.8094		non-significant	mmu-miR-27b-5p	NT tail	U
mmu-miR-27b-5p-0-1-A	3.39	-0.03	1.23	-0.02	0.9821		non-significant	mmu-miR-27b-5p	ambiguous tail	A
mmu-miR-3074-1-3p-0-0--	1.5	0.19	1.83	0.11	0.9163		non-significant	mmu-miR-3074-1-3p	canonical	other
mmu-miR-3074-5p-1-2-0-0--	6.42	0.27	1.01	0.27	0.7901		non-significant	mmu-miR-3074-5p-1-2	canonical	other
mmu-miR-9-5p-1-2-3-0-0--	31202.1	0.8	0.35	2.29	0.022	0.1379	non-significant	mmu-miR-9-5p-1-2-3	canonical	other
mmu-miR-9-5p-1-2-3-1-0--	13568.8	0.55	0.44	1.24	0.215	0.4884	non-significant	mmu-miR-9-5p-1-2-3	trimmed	other
mmu-miR-9-5p-1-2-3-2-0--	13397.8	0.54	0.44	1.21	0.2259	0.5042	non-significant	mmu-miR-9-5p-1-2-3	trimmed	other
mmu-miR-9-5p-1-2-3-1-1-T	7189.92	0.61	0.41	1.49	0.1368	0.3866	non-significant	mmu-miR-9-5p-1-2-3	ambiguous tail	U
mmu-miR-9-5p-1-2-3-3-0--	2091.4	1.05	0.42	2.49	0.0128	0.0985	non-significant	mmu-miR-9-5p-1-2-3	trimmed	other
mmu-miR-9-5p-1-2-3-1-1-C	1123.59	0.91	0.27	3.34	0.0008	0.0177	non-significant	mmu-miR-9-5p-1-2-3	ambiguous tail	C
mmu-miR-9-5p-1-2-3-1-2-TT	742.81	0.81	0.29	2.73	0.0063	0.0622	non-significant	mmu-miR-9-5p-1-2-3	ambiguous tail	UU
mmu-miR-9-5p-1-2-3-0-1-A	474.24	0.19	0.44	0.42	0.6737	0.8726	non-significant	mmu-miR-9-5p-1-2-3	NT tail	A
mmu-miR-9-5p-1-2-3-0-1-T	347.79	0.71	0.35	2.04	0.041	0.2015	non-significant	mmu-miR-9-5p-1-2-3	NT tail	U
mmu-miR-9-5p-1-2-3-2-1-T	200.41	0.6	0.48	1.25	0.2103	0.4832	non-significant	mmu-miR-9-5p-1-2-3	ambiguous tail	U
mmu-miR-9-5p-1-2-3-0-2-AA	172.87	0.58	0.38	1.52	0.1275	0.3747	non-significant	mmu-miR-9-5p-1-2-3	NT tail	AA
mmu-miR-9-5p-1-2-3-3-1-A	171.21	0.53	0.48	1.1	0.2707	0.5587	non-significant	mmu-miR-9-5p-1-2-3	ambiguous tail	A
mmu-miR-9-5p-1-2-3-2-1-A	126.83	0.16	0.63	0.25	0.8022	0.92	non-significant	mmu-miR-9-5p-1-2-3	ambiguous tail	A
mmu-miR-9-5p-1-2-3-1-2-TA	101.31	0.38	0.48	0.79	0.4309	0.7169	non-significant	mmu-miR-9-5p-1-2-3	ambiguous tail	UA
mmu-miR-9-5p-1-2-3-1-1-G	97.94	1.56	0.51	3.09	0.002	0.0296	significant	mmu-miR-9-5p-1-2-3	ambiguous tail	G
mmu-miR-9-5p-1-2-3-0-2-AT	50.75	0.72	0.44	1.65	0.0984	0.3235	non-significant	mmu-miR-9-5p-1-2-3	NT tail	AU
mmu-miR-9-5p-1-2-3-0-2-TT	43.74	0.7	0.53	1.32	0.1871	0.4549	non-significant	mmu-miR-9-5p-1-2-3	NT tail	UU
mmu-miR-9-5p-1-2-3-0-1-C	29.64	0.19	0.51	0.38	0.7066	0.8871	non-significant	mmu-miR-9-5p-1-2-3	NT tail	C
mmu-miR-9-5p-1-2-3-0-2-GT	21.24	0.68	1.11	0.61	0.5399	0.794	non-significant	mmu-miR-9-5p-1-2-3	NT tail	other
mmu-miR-9-5p-1-2-3-3-1-G	12.66	-0.97	1.44	-0.68	0.4981		non-significant	mmu-miR-9-5p-1-2-3	ambiguous tail	G
mmu-miR-9-3p-1-2-3-0-0--	2807.38	0.14	0.3	0.47	0.6358	0.8543	non-significant	mmu-miR-9-3p-1-2-3	canonical	other
mmu-miR-9-3p-1-2-3-0-1-T	122.22	-0.02	0.38	-0.06	0.9507	0.9804	non-significant	mmu-miR-9-3p-1-2-3	NT tail	U
mmu-miR-9-3p-1-2-3-2-0--	160.2	0.5	0.41	1.23	0.2191	0.4958	non-significant	mmu-miR-9-3p-1-2-3	trimmed	other
mmu-miR-9-3p-1-2-3-0-1-A	82.83	-0.14	0.41	-0.34	0.7365	0.8989	non-significant	mmu-miR-9-3p-1-2-3	NT tail	A
mmu-miR-9-3p-1-2-3-1-0--	85.94	0.26	0.39	0.68	0.4989	0.7594	non-significant	mmu-miR-9-3p-1-2-3	trimmed	other
mmu-miR-9-3p-1-2-3-0-2-AT	11.44	0.54	0.89	0.6	0.5456		non-significant	mmu-miR-9-3p-1-2-3	NT tail	AU
mmu-miR-9-3p-1-2-3-1-1-A	6.66	-1.74	1.18	-1.48	0.1393		non-significant	mmu-miR-9-3p-1-2-3	ambiguous tail	A
mmu-miR-582-5p-0-0--	40.38	-0.35	0.46	-0.76	0.4459	0.7279	non-significant	mmu-miR-582-5p	canonical	other
mmu-miR-582-5p-0-1-T	10.84	0.74	0.76	0.97	0.3304		non-significant	mmu-miR-582-5p	ambiguous tail	U
mmu-miR-582-5p-2-0--	12.68	1.12	0.83	1.35	0.1781		non-significant	mmu-miR-582-5p	trimmed	other
mmu-miR-582-5p-3-0--	3.44	0.13	1.37	0.1	0.9229		non-significant	mmu-miR-582-5p	trimmed	other
mmu-miR-582-3p-0-1-C	48.73	0.16	0.48	0.33	0.7398	0.8989	non-significant	mmu-miR-582-3p	ambiguous tail	C
mmu-miR-582-3p-0-2-CC	44.66	-0.66	0.48	-1.39	0.1656	0.4269	non-significant	mmu-miR-582-3p	ambiguous tail	other
mmu-miR-582-3p-0-0--	35.54	0.02	0.42	0.04	0.9688	0.9853	non-significant	mmu-miR-582-3p	canonical	other
mmu-miR-582-3p-0-2-CT	4.12	-0.88	1.5	-0.59	0.5568		non-significant	mmu-miR-582-3p	NT tail	other
mmu-miR-582-3p-0-3-CCT	5.11	-1.71	1.1	-1.56	0.1181		non-significant	mmu-miR-582-3p	NT tail	other
mmu-miR-582-3p-0-1-T	3.86	-1.17	1.53	-0.77	0.4435		non-significant	mmu-miR-582-3p	NT tail	U
mmu-miR-449a-5p-0-0--	129.41	0.88	0.47	1.86	0.063	0.2567	non-significant	mmu-miR-449a-5p	canonical	other
mmu-miR-449a-5p-0-1-T	26.08	0.54	0.83	0.66	0.5115	0.7698	non-significant	mmu-miR-449a-5p	ambiguous tail	U
mmu-miR-449a-5p-3-0--	6.56	0.47	1.18	0.4	0.6904		non-significant	mmu-miR-449a-5p	trimmed	other
mmu-miR-449a-5p-0-1-A	13.58	-0.03	0.86	-0.03	0.9767		non-significant	mmu-miR-449a-5p	NT tail	A
mmu-miR-449a-5p-1-0--	4.82	2.17	1.19	1.82	0.0687		non-significant	mmu-miR-449a-5p	trimmed	other
mmu-miR-449a-5p-1-1-A	4.86	-1.93	1.8	-1.08	0.2823		non-significant	mmu-miR-449a-5p	ambiguous tail	A
mmu-miR-449a-5p-2-0--	4.34	1.79	1.12	1.59	0.1119		non-significant	mmu-miR-449a-5p	trimmed	other
mmu-miR-449a-5p-0-2-TT	0.98	-0.53	2.71	-0.19	0.8462		non-significant	mmu-miR-449a-5p	NT tail	UU
mmu-miR-6946-3p-0-1-T	7.62	0.37	0.91	0.41	0.6842		non-significant	mmu-miR-6946-3p	NT tail	U
mmu-miR-346-5p-0-0--	336.82	-0.04	0.23	-0.18	0.8533	0.9403	non-significant	mmu-miR-346-5p	canonical	other
mmu-miR-346-5p-0-1-T	20.4	-0.54	0.58	-0.94	0.3456	0.6277	non-significant	mmu-miR-346-5p	NT tail	U
mmu-miR-346-5p-2-0--	21.82	-0.74	0.76	-0.98	0.3276	0.6135	non-significant	mmu-miR-346-5p	trimmed	other
mmu-miR-346-5p-1-0--	19.58	-0.19	0.62	-0.32	0.7524	0.9035	non-significant	mmu-miR-346-5p	trimmed	other
mmu-miR-346-5p-2-2-TT	7.22	-0.39	0.97	-0.4	0.6894		non-significant	mmu-miR-346-5p	ambiguous tail	UU
mmu-miR-346-5p-0-2-TT	2.95	-1.5	1.39	-1.08	0.2805		non-significant	mmu-miR-346-5p	NT tail	UU
mmu-miR-346-5p-0-2-AA	3.73	-1.41	2.45	-0.58	0.5647		non-significant	mmu-miR-346-5p	NT tail	AA
mmu-miR-346-5p-0-2-AT	6.25	-2.69	1.74	-1.54	0.1227		non-significant	mmu-miR-346-5p	NT tail	AU
mmu-miR-6948-3p-0-0--	35.62	0	0.48	-0.01	0.995	0.9971	non-significant	mmu-miR-6948-3p	canonical	other
mmu-miR-6948-3p-0-2-GT	3.99	0.06	1.12	0.05	0.9587		non-significant	mmu-miR-6948-3p	NT tail	other
mmu-miR-208b-3p-0-0--	4.94	-2.68	1.82	-1.47	0.1407		non-significant	mmu-miR-208b-3p	canonical	other
mmu-miR-208b-3p-1-0--	3.01	-1	1.45	-0.69	0.4898		non-significant	mmu-miR-208b-3p	trimmed	other
mmu-miR-16-1-3p-2-0--	4.7	-1.02	1.17	-0.88	0.3805		non-significant	mmu-miR-16-1-3p	trimmed	other
mmu-miR-16-5p-1-2-0-0--	28077.8	1.14	0.22	5.26	0	0	significant	mmu-miR-16-5p-1-2	canonical	other
mmu-miR-16-5p-1-2-1-0--	7030.02	1.2	0.3	3.99	0.0001	0.0034	significant	mmu-miR-16-5p-1-2	trimmed	other
mmu-miR-16-5p-1-2-0-1-T	231.63	0.37	0.35	1.06	0.2891	0.5773	non-significant	mmu-miR-16-5p-1-2	NT tail	U
mmu-miR-16-5p-1-2-1-1-A	72.08	0.97	0.4	2.46	0.0139	0.1029	non-significant	mmu-miR-16-5p-1-2	ambiguous tail	A
mmu-miR-16-5p-1-2-0-2-TT	23.05	0.03	0.61	0.05	0.9636	0.985	non-significant	mmu-miR-16-5p-1-2	NT tail	UU
mmu-miR-16-5p-1-2-2-0--	35.12	2.04	1.13	1.8	0.0715	0.2715	non-significant	mmu-miR-16-5p-1-2	trimmed	other
mmu-miR-15a-3p-2-0--	35.06	-0.15	0.56	-0.26	0.7914	0.9137	non-significant	mmu-miR-15a-3p	trimmed	other
mmu-miR-15a-3p-1-1-T	2.26	-3.37	1.94	-1.73	0.0828		non-significant	mmu-miR-15a-3p	ambiguous tail	U
mmu-miR-15a-5p-1-0--	283.56	0.62	0.38	1.63	0.1026	0.3327	non-significant	mmu-miR-15a-5p	trimmed	other
mmu-miR-15a-5p-2-0--	95.06	1.29	0.49	2.6	0.0093	0.0804	non-significant	mmu-miR-15a-5p	trimmed	other
mmu-miR-15a-5p-0-0--	32.29	0.54	0.52	1.04	0.2968	0.5853	non-significant	mmu-miR-15a-5p	canonical	other
mmu-miR-15a-5p-1-1-A	19.65	-0.15	0.72	-0.21	0.8342	0.9333	non-significant	mmu-miR-15a-5p	ambiguous tail	A
mmu-miR-15a-5p-1-1-T	6.04	0.04	1.78	0.02	0.9827		non-significant	mmu-miR-15a-5p	ambiguous tail	U
mmu-miR-15a-5p-0-1-T	3.96	0.06	1.34	0.05	0.9636		non-significant	mmu-miR-15a-5p	NT tail	U
mmu-miR-15a-5p-0-1-G	5.73	-0.48	1.15	-0.41	0.6791		non-significant	mmu-miR-15a-5p	NT tail	G
mmu-miR-15a-5p-0-1-A	2.51	0.67	1.54	0.44	0.6621		non-significant	mmu-miR-15a-5p	NT tail	A
mmu-miR-15a-5p-0-2-GA	1.22	-1.16	3.17	-0.37	0.7139		non-significant	mmu-miR-15a-5p	NT tail	other
mmu-miR-12185-3p-1-0--	10.35	-0.69	0.97	-0.71	0.4785		non-significant	mmu-miR-12185-3p	trimmed	other
mmu-miR-598-3p-0-1-T	380.83	0.29	0.41	0.71	0.4771	0.7476	non-significant	mmu-miR-598-3p	ambiguous tail	U
mmu-miR-598-3p-1-0--	229.99	0.65	0.47	1.37	0.1702	0.4335	non-significant	mmu-miR-598-3p	trimmed	other
mmu-miR-598-3p-0-2-TC	228.64	-0.82	0.34	-2.42	0.0154	0.1119	non-significant	mmu-miR-598-3p	ambiguous tail	other
mmu-miR-598-3p-0-0--	56.74	-0.11	0.65	-0.18	0.8598	0.9448	non-significant	mmu-miR-598-3p	canonical	other
mmu-miR-598-3p-0-3-TCA	39.9	-0.52	0.59	-0.88	0.3764	0.6582	non-significant	mmu-miR-598-3p	ambiguous tail	other
mmu-miR-598-3p-2-0--	29.81	0.15	0.75	0.2	0.8415	0.9365	non-significant	mmu-miR-598-3p	trimmed	other
mmu-miR-598-3p-0-3-TCT	9.57	0.05	0.9	0.06	0.9512		non-significant	mmu-miR-598-3p	NT tail	other
mmu-miR-598-3p-3-1-A	20.69	0.73	0.57	1.28	0.2002	0.4734	non-significant	mmu-miR-598-3p	ambiguous tail	A
mmu-miR-598-3p-0-2-TT	3.87	0.3	1.54	0.19	0.8454		non-significant	mmu-miR-598-3p	NT tail	UU
mmu-miR-598-3p-0-2-TA	1.32	-2	3.3	-0.61	0.545		non-significant	mmu-miR-598-3p	NT tail	UA
mmu-miR-598-3p-1-2-GA	3.79	-0.69	1.55	-0.45	0.6558		non-significant	mmu-miR-598-3p	ambiguous tail	other
mmu-miR-124-5p-1-2-3-0-0--	67.03	0.3	0.36	0.85	0.3941	0.6765	non-significant	mmu-miR-124-5p-1-2-3	canonical	other
mmu-miR-124-5p-1-2-3-0-1-T	29.53	0.14	0.47	0.3	0.764	0.9079	non-significant	mmu-miR-124-5p-1-2-3	NT tail	U
mmu-miR-124-5p-1-2-3-1-0--	19.01	0.3	0.67	0.44	0.6571	0.864	non-significant	mmu-miR-124-5p-1-2-3	trimmed	other
mmu-miR-124-3p-1-2-3-0-0--	11628	-0.02	0.22	-0.11	0.9158	0.9734	non-significant	mmu-miR-124-3p-1-2-3	canonical	other
mmu-miR-124-3p-1-2-3-1-0--	4956.49	0.12	0.24	0.5	0.6192	0.844	non-significant	mmu-miR-124-3p-1-2-3	trimmed	other
mmu-miR-124-3p-1-2-3-0-1-A	1516.26	-0.44	0.26	-1.7	0.0891	0.3065	non-significant	mmu-miR-124-3p-1-2-3	NT tail	A
mmu-miR-124-3p-1-2-3-0-1-T	861.97	-0.01	0.33	-0.02	0.9805	0.9919	non-significant	mmu-miR-124-3p-1-2-3	NT tail	U
mmu-miR-124-3p-1-2-3-0-2-AT	266.16	-0.45	0.24	-1.9	0.0581	0.2464	non-significant	mmu-miR-124-3p-1-2-3	NT tail	AU
mmu-miR-124-3p-1-2-3-2-0--	368.87	0.53	0.27	2.01	0.0443	0.2108	non-significant	mmu-miR-124-3p-1-2-3	trimmed	other
mmu-miR-124-3p-1-2-3-0-2-AA	241.86	-0.25	0.29	-0.87	0.3826	0.6648	non-significant	mmu-miR-124-3p-1-2-3	NT tail	AA
mmu-miR-124-3p-1-2-3-0-3-AAT	229.43	-0.45	0.28	-1.61	0.1085	0.3425	non-significant	mmu-miR-124-3p-1-2-3	NT tail	AAU
mmu-miR-124-3p-1-2-3-0-3-ATT	77.54	-0.69	0.47	-1.48	0.1392	0.3878	non-significant	mmu-miR-124-3p-1-2-3	NT tail	AUU
mmu-miR-124-3p-1-2-3-0-3-AAA	60.79	-1.23	0.44	-2.81	0.005	0.0537	non-significant	mmu-miR-124-3p-1-2-3	NT tail	AAA
mmu-miR-124-3p-1-2-3-1-1-T	39.1	0.16	0.53	0.3	0.7679	0.9079	non-significant	mmu-miR-124-3p-1-2-3	ambiguous tail	U
mmu-miR-124-3p-1-2-3-0-1-G	40.37	1.1	0.53	2.06	0.0398	0.1979	non-significant	mmu-miR-124-3p-1-2-3	NT tail	G
mmu-miR-124-3p-1-2-3-2-1-T	30.61	0.4	0.58	0.68	0.4957	0.7586	non-significant	mmu-miR-124-3p-1-2-3	ambiguous tail	U
mmu-miR-124-3p-1-2-3-3-0--	48.8	0.97	0.55	1.77	0.0773	0.2831	non-significant	mmu-miR-124-3p-1-2-3	trimmed	other
mmu-miR-124-3p-1-2-3-2-1-A	34.87	-1.64	1.35	-1.22	0.2224	0.4992	non-significant	mmu-miR-124-3p-1-2-3	ambiguous tail	A
mmu-miR-124-3p-1-2-3-1-1-A	28.77	-1.2	1.42	-0.84	0.3982	0.6816	non-significant	mmu-miR-124-3p-1-2-3	ambiguous tail	A
mmu-miR-3078-5p-0-0--	186.95	-0.55	0.36	-1.52	0.1278	0.3748	non-significant	mmu-miR-3078-5p	canonical	other
mmu-miR-3078-5p-1-0--	8.97	-0.43	0.84	-0.51	0.6083		non-significant	mmu-miR-3078-5p	trimmed	other
mmu-miR-3078-5p-0-1-T	1.73	-0.61	1.75	-0.35	0.7249		non-significant	mmu-miR-3078-5p	ambiguous tail	U
mmu-miR-3078-5p-1-1-G	0.97	-0.44	2.05	-0.21	0.8316		non-significant	mmu-miR-3078-5p	ambiguous tail	G
mmu-miR-320-3p-0-0--	420.82	-0.54	0.27	-2.04	0.0417	0.2028	non-significant	mmu-miR-320-3p	canonical	other
mmu-miR-320-3p-0-1-T	122.12	-0.54	0.31	-1.78	0.0752	0.2781	non-significant	mmu-miR-320-3p	NT tail	U
mmu-miR-320-3p-0-2-TT	172.94	0.21	0.37	0.58	0.5649	0.8113	non-significant	mmu-miR-320-3p	NT tail	UU
mmu-miR-320-3p-2-0--	84.81	0.81	0.37	2.2	0.0279	0.1572	non-significant	mmu-miR-320-3p	trimmed	other
mmu-miR-320-3p-0-1-A	89.92	-0.62	0.34	-1.86	0.0626	0.2562	non-significant	mmu-miR-320-3p	ambiguous tail	A
mmu-miR-320-3p-1-1-T	68.44	-0.23	0.4	-0.58	0.5606	0.8081	non-significant	mmu-miR-320-3p	ambiguous tail	U
mmu-miR-320-3p-1-0--	49.33	-0.35	0.49	-0.7	0.4827	0.7477	non-significant	mmu-miR-320-3p	trimmed	other
mmu-miR-320-3p-0-2-AT	71.35	-0.43	0.41	-1.03	0.3009	0.5903	non-significant	mmu-miR-320-3p	NT tail	AU
mmu-miR-320-3p-1-2-TT	19.27	0.68	0.67	1.02	0.3083	0.5945	non-significant	mmu-miR-320-3p	ambiguous tail	UU
mmu-miR-320-3p-0-3-TTT	11.38	-0.89	0.83	-1.07	0.2851		non-significant	mmu-miR-320-3p	NT tail	UUU
mmu-miR-320-3p-2-1-T	9.59	-0.54	0.77	-0.7	0.4817		non-significant	mmu-miR-320-3p	ambiguous tail	U
mmu-miR-320-3p-0-3-ATT	15.91	-0.26	0.71	-0.37	0.7108		non-significant	mmu-miR-320-3p	NT tail	AUU
mmu-miR-320-3p-0-2-TA	13.84	-0.19	0.78	-0.24	0.8115		non-significant	mmu-miR-320-3p	NT tail	UA
mmu-miR-320-3p-1-1-G	6.71	1.49	1.27	1.18	0.2384		non-significant	mmu-miR-320-3p	ambiguous tail	G
mmu-miR-320-3p-0-2-AA	14.62	-0.13	0.85	-0.16	0.8742		non-significant	mmu-miR-320-3p	ambiguous tail	AA
mmu-miR-320-3p-0-3-AAT	5.85	-1.29	1.3	-0.99	0.3204		non-significant	mmu-miR-320-3p	NT tail	AAU
mmu-miR-320-3p-3-1-A	4.92	0.63	1.23	0.51	0.6106		non-significant	mmu-miR-320-3p	ambiguous tail	A
mmu-miR-320-3p-3-0--	5.94	-0.15	1.04	-0.14	0.8855		non-significant	mmu-miR-320-3p	trimmed	other
mmu-miR-320-3p-1-1-C	3.38	-1.76	1.79	-0.98	0.3275		non-significant	mmu-miR-320-3p	ambiguous tail	C
mmu-miR-320-3p-0-3-ACT	2.08	0.65	2.41	0.27	0.7885		non-significant	mmu-miR-320-3p	NT tail	other
mmu-miR-17-5p-0-0--	62.68	-0.19	0.53	-0.36	0.7217	0.8958	non-significant	mmu-miR-17-5p	canonical	other
mmu-miR-17-5p-0-1-T	25.03	-0.48	0.86	-0.55	0.5789	0.8163	non-significant	mmu-miR-17-5p	ambiguous tail	U
mmu-miR-17-5p-2-0--	11.93	-0.02	0.77	-0.02	0.9816		non-significant	mmu-miR-17-5p	trimmed	other
mmu-miR-17-5p-1-2-TT	2.98	-0.16	1.72	-0.09	0.9251		non-significant	mmu-miR-17-5p	ambiguous tail	UU
mmu-miR-17-5p-1-1-T	3.79	0.81	1.27	0.64	0.5211		non-significant	mmu-miR-17-5p	ambiguous tail	U
mmu-miR-17-5p-0-1-A	1.68	-1.48	1.95	-0.76	0.4483		non-significant	mmu-miR-17-5p	NT tail	A
mmu-miR-17-3p-0-2-CT	7.28	0.75	1.16	0.64	0.5207		non-significant	mmu-miR-17-3p	NT tail	other
mmu-miR-17-3p-1-0--	18.09	0.09	0.7	0.13	0.8987	0.9675	non-significant	mmu-miR-17-3p	trimmed	other
mmu-miR-17-3p-2-0--	4.99	-1.07	1.43	-0.75	0.4514		non-significant	mmu-miR-17-3p	trimmed	other
mmu-miR-17-3p-0-1-T	4.02	0.45	1.18	0.38	0.7016		non-significant	mmu-miR-17-3p	NT tail	U
mmu-miR-18a-3p-0-0--	23.81	-0.47	0.85	-0.56	0.5775	0.8163	non-significant	mmu-miR-18a-3p	canonical	other
mmu-miR-18a-3p-1-0--	15.44	0.03	0.61	0.06	0.9553		non-significant	mmu-miR-18a-3p	trimmed	other
mmu-miR-18a-3p-0-1-G	5.29	-1.85	1.24	-1.5	0.1341		non-significant	mmu-miR-18a-3p	ambiguous tail	G
mmu-miR-18a-3p-0-1-T	10.15	-0.25	0.75	-0.34	0.7356		non-significant	mmu-miR-18a-3p	NT tail	U
mmu-miR-20a-5p-0-0--	88.62	-0.1	0.45	-0.22	0.8273	0.9333	non-significant	mmu-miR-20a-5p	canonical	other
mmu-miR-20a-5p-0-1-T	13.29	0.19	0.96	0.2	0.8453		non-significant	mmu-miR-20a-5p	ambiguous tail	U
mmu-miR-20a-5p-1-0--	4.42	-0.3	1.43	-0.21	0.8319		non-significant	mmu-miR-20a-5p	trimmed	other
mmu-miR-20a-3p-0-1-T	5.59	-1.05	1.24	-0.85	0.3944		non-significant	mmu-miR-20a-3p	ambiguous tail	U
mmu-miR-19b-3p-1-2-1-0--	31.07	0.1	0.52	0.19	0.8488	0.9384	non-significant	mmu-miR-19b-3p-1-2	trimmed	other
mmu-miR-19b-3p-1-2-0-0--	28.11	0.37	0.59	0.64	0.5249	0.7833	non-significant	mmu-miR-19b-3p-1-2	canonical	other
mmu-miR-19b-3p-1-2-1-1-T	10.99	0.59	0.81	0.73	0.4684		non-significant	mmu-miR-19b-3p-1-2	ambiguous tail	U
mmu-miR-19b-3p-1-2-1-2-TT	2.15	0.61	1.62	0.38	0.7072		non-significant	mmu-miR-19b-3p-1-2	ambiguous tail	UU
mmu-miR-19b-3p-1-2-3-0--	3.32	0.91	1.41	0.65	0.5174		non-significant	mmu-miR-19b-3p-1-2	trimmed	other
mmu-miR-92a-1-5p-0-0--	8.26	0.09	0.82	0.11	0.9124		non-significant	mmu-miR-92a-1-5p	canonical	other
mmu-miR-92a-3p-1-2-0-1-T	7034.78	0.18	0.3	0.58	0.5592	0.808	non-significant	mmu-miR-92a-3p-1-2	NT tail	U
mmu-miR-92a-3p-1-2-0-2-TT	1131.44	-0.08	0.28	-0.27	0.7843	0.9082	non-significant	mmu-miR-92a-3p-1-2	NT tail	UU
mmu-miR-92a-3p-1-2-0-3-TTT	896.88	-0.04	0.36	-0.11	0.9094	0.9694	non-significant	mmu-miR-92a-3p-1-2	NT tail	UUU
mmu-miR-92a-3p-1-2-0-3-TAT	2205.77	-1.02	0.78	-1.32	0.188	0.4556	non-significant	mmu-miR-92a-3p-1-2	NT tail	UAU
mmu-miR-92a-3p-1-2-0-0--	271.95	-0.04	0.34	-0.1	0.9169	0.9734	non-significant	mmu-miR-92a-3p-1-2	canonical	other
mmu-miR-92a-3p-1-2-0-3-TAA	1119.88	-0.94	1.32	-0.71	0.4777	0.7476	non-significant	mmu-miR-92a-3p-1-2	NT tail	UAA
mmu-miR-92a-3p-1-2-0-1-A	187.18	-0.24	0.63	-0.38	0.7065	0.8871	non-significant	mmu-miR-92a-3p-1-2	NT tail	A
mmu-miR-92a-3p-1-2-0-2-TA	446.3	-1.18	0.81	-1.46	0.1437	0.3917	non-significant	mmu-miR-92a-3p-1-2	NT tail	UA
mmu-miR-92a-3p-1-2-1-0--	101.81	-0.71	0.42	-1.7	0.0893	0.3066	non-significant	mmu-miR-92a-3p-1-2	trimmed	other
mmu-miR-92a-3p-1-2-0-1-G	59.35	1.17	0.36	3.25	0.0012	0.0206	significant	mmu-miR-92a-3p-1-2	NT tail	G
mmu-miR-92a-3p-1-2-0-2-AT	43.48	0.13	0.83	0.16	0.8751	0.9555	non-significant	mmu-miR-92a-3p-1-2	NT tail	AU
mmu-miR-92a-3p-1-2-2-0--	32.9	0.69	0.49	1.42	0.1565	0.4129	non-significant	mmu-miR-92a-3p-1-2	trimmed	other
mmu-miR-92a-3p-1-2-0-3-TTC	16.42	-0.52	1.1	-0.47	0.6366		non-significant	mmu-miR-92a-3p-1-2	NT tail	other
mmu-miR-92a-3p-1-2-0-3-ATT	22.48	-0.59	1.25	-0.47	0.6359	0.8543	non-significant	mmu-miR-92a-3p-1-2	NT tail	AUU
mmu-miR-92a-3p-1-2-0-3-TTA	56.54	-0.65	0.85	-0.76	0.4457	0.7279	non-significant	mmu-miR-92a-3p-1-2	NT tail	UUA
mmu-miR-7117-3p-0-1-T	1.39	-1.63	2.07	-0.78	0.4329		non-significant	mmu-miR-7117-3p	NT tail	U
mmu-miR-30b-3p-0-0--	60.65	1.56	0.42	3.71	0.0002	0.0068	significant	mmu-miR-30b-3p	canonical	other
mmu-miR-30d-3p-0-0--	116.8	0.84	0.37	2.25	0.0242	0.146	non-significant	mmu-miR-30d-3p	canonical	other
mmu-miR-30d-3p-0-1-T	16.21	0.65	0.62	1.04	0.2968		non-significant	mmu-miR-30d-3p	NT tail	U
mmu-miR-30d-3p-2-0--	19.7	1.56	0.8	1.93	0.0531	0.2349	non-significant	mmu-miR-30d-3p	trimmed	other
mmu-miR-30d-5p-2-0--	86473.4	-0.15	0.27	-0.56	0.5788	0.8163	non-significant	mmu-miR-30d-5p	trimmed	other
mmu-miR-30d-5p-0-2-CT	31604.4	-0.22	0.16	-1.31	0.1891	0.4574	non-significant	mmu-miR-30d-5p	NT tail	other
mmu-miR-30d-5p-0-1-C	6001.14	-0.06	0.18	-0.35	0.7262	0.8973	non-significant	mmu-miR-30d-5p	NT tail	C
mmu-miR-30d-5p-1-0--	5998.58	-0.07	0.2	-0.33	0.7412	0.8989	non-significant	mmu-miR-30d-5p	trimmed	other
mmu-miR-30d-5p-0-1-A	5238	0.09	0.14	0.64	0.5235	0.7819	non-significant	mmu-miR-30d-5p	NT tail	A
mmu-miR-30d-5p-0-3-CTT	3456.55	-0.09	0.21	-0.42	0.6758	0.874	non-significant	mmu-miR-30d-5p	NT tail	other
mmu-miR-30d-5p-0-0--	1311.54	-0.1	0.17	-0.59	0.5526	0.8041	non-significant	mmu-miR-30d-5p	canonical	other
mmu-miR-30d-5p-0-1-T	1273.72	0.1	0.22	0.44	0.6567	0.864	non-significant	mmu-miR-30d-5p	NT tail	U
mmu-miR-30d-5p-1-1-A	1014.65	-0.42	0.17	-2.49	0.0128	0.0985	non-significant	mmu-miR-30d-5p	ambiguous tail	A
mmu-miR-30d-5p-0-2-CG	449.33	1.27	0.27	4.66	0	0.0004	significant	mmu-miR-30d-5p	NT tail	other
mmu-miR-30d-5p-3-1-G	370.89	1.07	0.32	3.35	0.0008	0.0171	significant	mmu-miR-30d-5p	ambiguous tail	G
mmu-miR-30d-5p-3-0--	135.95	1.18	0.31	3.78	0.0002	0.0056	significant	mmu-miR-30d-5p	trimmed	other
mmu-miR-30d-5p-1-1-T	59.46	-0.26	0.45	-0.58	0.5619	0.8095	non-significant	mmu-miR-30d-5p	ambiguous tail	U
mmu-miR-30d-5p-2-1-T	80.78	-0.26	0.3	-0.87	0.3866	0.6673	non-significant	mmu-miR-30d-5p	ambiguous tail	U
mmu-miR-30d-5p-1-2-AA	35.56	-0.17	0.42	-0.39	0.6944	0.8826	non-significant	mmu-miR-30d-5p	ambiguous tail	AA
mmu-miR-30d-5p-0-2-CA	33.98	0.1	0.41	0.25	0.7995	0.9197	non-significant	mmu-miR-30d-5p	NT tail	other
mmu-miR-30d-5p-2-1-G	18.13	0.09	0.59	0.14	0.8849	0.9618	non-significant	mmu-miR-30d-5p	ambiguous tail	G
mmu-miR-30d-5p-2-2-GA	26.61	-0.33	0.6	-0.56	0.5783	0.8163	non-significant	mmu-miR-30d-5p	ambiguous tail	other
mmu-miR-30d-5p-3-1-T	26.53	0.42	0.56	0.74	0.4605	0.7381	non-significant	mmu-miR-30d-5p	ambiguous tail	U
mmu-miR-30d-5p-9-7-TACTGGA	10.58	-0.86	1.46	-0.59	0.5549		non-significant	mmu-miR-30d-5p	ambiguous tail	other
mmu-miR-30d-5p-6-4-CGGA	10.2	-1.19	1.54	-0.77	0.4388		non-significant	mmu-miR-30d-5p	ambiguous tail	other
mmu-miR-30d-5p-4-2-TA	11.46	1.36	1.48	0.92	0.3575		non-significant	mmu-miR-30d-5p	ambiguous tail	UA
mmu-miR-30d-5p-4-1-A	12.08	-3.37	2.31	-1.46	0.1437		non-significant	mmu-miR-30d-5p	ambiguous tail	A
mmu-miR-151-3p-0-0--	14544.2	0.15	0.27	0.55	0.5798	0.8163	non-significant	mmu-miR-151-3p	canonical	other
mmu-miR-151-3p-0-1-A	8416.73	-0.19	0.19	-1.02	0.3061	0.5944	non-significant	mmu-miR-151-3p	NT tail	A
mmu-miR-151-3p-0-1-T	5645.01	0.13	0.22	0.59	0.5562	0.8048	non-significant	mmu-miR-151-3p	NT tail	U
mmu-miR-151-3p-1-0--	3662.91	-0.07	0.3	-0.24	0.8095	0.9246	non-significant	mmu-miR-151-3p	trimmed	other
mmu-miR-151-3p-1-1-A	2896.78	-0.16	0.26	-0.61	0.54	0.794	non-significant	mmu-miR-151-3p	ambiguous tail	A
mmu-miR-151-3p-0-2-AT	1784.99	-0.23	0.17	-1.33	0.182	0.4479	non-significant	mmu-miR-151-3p	NT tail	AU
mmu-miR-151-3p-2-0--	1442.84	-0.14	0.28	-0.49	0.6251	0.8474	non-significant	mmu-miR-151-3p	trimmed	other
mmu-miR-151-3p-0-2-AA	1581.24	-0.07	0.38	-0.2	0.8448	0.9367	non-significant	mmu-miR-151-3p	NT tail	AA
mmu-miR-151-3p-0-2-TT	1006.49	0.1	0.27	0.39	0.6992	0.885	non-significant	mmu-miR-151-3p	NT tail	UU
mmu-miR-151-3p-1-1-T	865.56	0.14	0.27	0.51	0.6115	0.8386	non-significant	mmu-miR-151-3p	ambiguous tail	U
mmu-miR-151-3p-0-3-ACT	523.92	-0.12	0.26	-0.48	0.6314	0.8506	non-significant	mmu-miR-151-3p	NT tail	other
mmu-miR-151-3p-0-3-ATT	356.08	-0.2	0.21	-0.95	0.3412	0.6248	non-significant	mmu-miR-151-3p	NT tail	AUU
mmu-miR-151-3p-2-2-AA	428.62	-0.24	0.35	-0.67	0.5018	0.7619	non-significant	mmu-miR-151-3p	ambiguous tail	AA
mmu-miR-151-3p-1-2-AA	411.61	-0.43	0.25	-1.75	0.0806	0.2889	non-significant	mmu-miR-151-3p	ambiguous tail	AA
mmu-miR-151-3p-0-2-AC	285.57	0.07	0.37	0.19	0.8491	0.9384	non-significant	mmu-miR-151-3p	NT tail	other
mmu-miR-151-3p-2-1-A	287.21	-0.44	0.45	-0.98	0.3275	0.6135	non-significant	mmu-miR-151-3p	ambiguous tail	A
mmu-miR-151-3p-0-3-TTT	181.39	0.01	0.25	0.04	0.9675	0.985	non-significant	mmu-miR-151-3p	NT tail	UUU
mmu-miR-151-3p-1-2-TT	182.25	0.11	0.33	0.32	0.751	0.9026	non-significant	mmu-miR-151-3p	ambiguous tail	UU
mmu-miR-151-3p-0-3-AAT	222.35	-0.25	0.44	-0.57	0.569	0.8141	non-significant	mmu-miR-151-3p	NT tail	AAU
mmu-miR-151-3p-0-3-AAA	222.54	-0.57	0.51	-1.12	0.2637	0.5507	non-significant	mmu-miR-151-3p	NT tail	AAA
mmu-miR-151-3p-1-3-AAA	119.18	-0.29	0.36	-0.81	0.4181	0.7024	non-significant	mmu-miR-151-3p	ambiguous tail	AAA
mmu-miR-151-3p-0-2-TA	132.77	-0.03	0.4	-0.07	0.9447	0.9795	non-significant	mmu-miR-151-3p	NT tail	UA
mmu-miR-151-3p-2-1-T	68.2	-0.29	0.46	-0.62	0.5353	0.7917	non-significant	mmu-miR-151-3p	ambiguous tail	U
mmu-miR-151-3p-1-2-AT	80.21	-0.42	0.33	-1.26	0.2072	0.4793	non-significant	mmu-miR-151-3p	ambiguous tail	AU
mmu-miR-151-3p-3-1-T	41.65	-0.09	0.45	-0.2	0.8394	0.9352	non-significant	mmu-miR-151-3p	ambiguous tail	U
mmu-miR-151-3p-0-3-ACC	76.11	-0.04	0.36	-0.12	0.9023	0.9675	non-significant	mmu-miR-151-3p	NT tail	other
mmu-miR-151-3p-0-3-TAT	65.2	-0.16	0.6	-0.28	0.7826	0.9082	non-significant	mmu-miR-151-3p	NT tail	UAU
mmu-miR-151-3p-2-2-TT	39.93	0.17	0.49	0.34	0.7305	0.8989	non-significant	mmu-miR-151-3p	ambiguous tail	UU
mmu-miR-151-3p-1-3-AAT	37.75	-0.46	0.46	-1	0.3172	0.6038	non-significant	mmu-miR-151-3p	ambiguous tail	AAU
mmu-miR-151-3p-2-3-AAA	44.86	-0.59	0.54	-1.09	0.2747	0.5611	non-significant	mmu-miR-151-3p	ambiguous tail	AAA
mmu-miR-151-3p-1-2-TA	30.95	-0.11	0.73	-0.15	0.8784	0.9574	non-significant	mmu-miR-151-3p	ambiguous tail	UA
mmu-miR-151-3p-2-2-AT	34.41	-0.01	0.57	-0.02	0.9811	0.992	non-significant	mmu-miR-151-3p	ambiguous tail	AU
mmu-miR-151-3p-1-3-TAA	15.66	0.27	1.59	0.17	0.8667		non-significant	mmu-miR-151-3p	ambiguous tail	UAA
mmu-miR-151-3p-0-1-G	22.53	0.98	0.54	1.8	0.0711	0.2712	non-significant	mmu-miR-151-3p	NT tail	G
mmu-miR-151-3p-0-3-TAA	10.26	-3.48	2.34	-1.49	0.1368		non-significant	mmu-miR-151-3p	NT tail	UAA
mmu-miR-151-5p-0-0--	23279.6	-0.05	0.19	-0.25	0.8014	0.9197	non-significant	mmu-miR-151-5p	canonical	other
mmu-miR-151-5p-0-1-A	2099.44	0.03	0.23	0.12	0.901	0.9675	non-significant	mmu-miR-151-5p	NT tail	A
mmu-miR-151-5p-1-0--	894.46	0.38	0.19	2.04	0.0414	0.2028	non-significant	mmu-miR-151-5p	trimmed	other
mmu-miR-151-5p-3-0--	196.5	0.38	0.31	1.22	0.221	0.4978	non-significant	mmu-miR-151-5p	trimmed	other
mmu-miR-151-5p-0-2-AA	119.57	-0.48	0.3	-1.57	0.1155	0.3552	non-significant	mmu-miR-151-5p	NT tail	AA
mmu-miR-151-5p-0-2-AT	102.43	-0.6	0.35	-1.74	0.0827	0.2946	non-significant	mmu-miR-151-5p	NT tail	AU
mmu-miR-151-5p-0-1-T	79.4	-0.11	0.36	-0.3	0.7622	0.9079	non-significant	mmu-miR-151-5p	NT tail	U
mmu-miR-151-5p-0-3-ATT	56.76	0	0.48	0	0.9969	0.9975	non-significant	mmu-miR-151-5p	NT tail	AUU
mmu-miR-151-5p-1-1-G	32.81	1.2	0.48	2.48	0.0133	0.0997	non-significant	mmu-miR-151-5p	ambiguous tail	G
mmu-miR-151-5p-1-1-A	47.6	-0.3	0.63	-0.48	0.6336	0.8524	non-significant	mmu-miR-151-5p	ambiguous tail	A
mmu-miR-151-5p-0-2-AC	18.84	-0.8	0.98	-0.81	0.4157	0.7006	non-significant	mmu-miR-151-5p	NT tail	other
mmu-miR-6952-3p-0-1-T	17.24	-0.07	0.72	-0.1	0.9211		non-significant	mmu-miR-6952-3p	NT tail	U
mmu-miR-6953-3p-0-1-T	6.23	0.7	1.07	0.66	0.512		non-significant	mmu-miR-6953-3p	NT tail	U
mmu-miR-6953-3p-0-0--	6.31	-0.68	1.33	-0.51	0.6097		non-significant	mmu-miR-6953-3p	canonical	other
mmu-miR-6953-3p-1-0--	5.1	-1.37	1.38	-1	0.3194		non-significant	mmu-miR-6953-3p	trimmed	other
mmu-miR-1943-5p-0-0--	30.47	-0.82	0.68	-1.21	0.2263	0.5045	non-significant	mmu-miR-1943-5p	canonical	other
mmu-miR-33-5p-1-0--	2.39	1.05	1.92	0.55	0.5837		non-significant	mmu-miR-33-5p	trimmed	other
mmu-miR-1249-3p-0-0--	3090.35	-1.03	0.34	-3.03	0.0024	0.0333	significant	mmu-miR-1249-3p	canonical	other
mmu-miR-1249-3p-1-0--	594.25	-0.94	0.31	-3	0.0027	0.0354	non-significant	mmu-miR-1249-3p	trimmed	other
mmu-miR-1249-3p-2-0--	427.45	-1.05	0.39	-2.7	0.007	0.0657	non-significant	mmu-miR-1249-3p	trimmed	other
mmu-miR-1249-3p-0-1-T	92.18	-0.67	0.46	-1.48	0.1393	0.3878	non-significant	mmu-miR-1249-3p	NT tail	U
mmu-miR-1249-3p-1-1-T	77.02	-1.11	0.37	-2.96	0.0031	0.0389	significant	mmu-miR-1249-3p	ambiguous tail	U
mmu-miR-1249-3p-3-0--	71.82	-1.03	0.56	-1.85	0.0642	0.2592	non-significant	mmu-miR-1249-3p	trimmed	other
mmu-miR-1249-3p-0-1-A	70.11	-1.05	0.58	-1.82	0.0688	0.2674	non-significant	mmu-miR-1249-3p	NT tail	A
mmu-let-7b-3p-1-1-T	1476.35	-0.7	0.24	-2.91	0.0037	0.0434	non-significant	mmu-let-7b-3p	ambiguous tail	U
mmu-let-7b-3p-1-0--	109.21	-0.61	0.34	-1.78	0.0744	0.2781	non-significant	mmu-let-7b-3p	trimmed	other
mmu-let-7b-3p-1-2-TT	85.86	-0.79	0.33	-2.4	0.0163	0.1158	non-significant	mmu-let-7b-3p	ambiguous tail	UU
mmu-let-7b-3p-2-2-TT	53.43	-0.31	0.42	-0.73	0.4665	0.7429	non-significant	mmu-let-7b-3p	ambiguous tail	UU
mmu-let-7b-3p-2-0--	13.65	-0.53	0.79	-0.67	0.5041		non-significant	mmu-let-7b-3p	trimmed	other
mmu-let-7b-3p-1-3-TTT	16.5	-1.08	0.76	-1.43	0.1534		non-significant	mmu-let-7b-3p	ambiguous tail	UUU
mmu-let-7b-3p-1-1-A	18	-2.18	1.01	-2.16	0.0306	0.1685	non-significant	mmu-let-7b-3p	ambiguous tail	A
mmu-let-7b-3p-1-1-G	9.21	0.77	0.79	0.97	0.3341		non-significant	mmu-let-7b-3p	ambiguous tail	G
mmu-let-7b-3p-2-1-T	7.15	-2.15	1.21	-1.78	0.0758		non-significant	mmu-let-7b-3p	ambiguous tail	U
mmu-miR-6958-3p-0-0--	3.08	-1.69	1.5	-1.13	0.2601		non-significant	mmu-miR-6958-3p	canonical	other
mmu-miR-148b-5p-0-0--	71.17	-0.1	0.32	-0.3	0.767	0.9079	non-significant	mmu-miR-148b-5p	canonical	other
mmu-miR-148b-5p-1-0--	35.85	0.09	0.41	0.21	0.8299	0.9333	non-significant	mmu-miR-148b-5p	trimmed	other
mmu-miR-148b-3p-0-2-TT	2564.42	-0.09	0.24	-0.38	0.7069	0.8871	non-significant	mmu-miR-148b-3p	NT tail	UU
mmu-miR-148b-3p-0-0--	2317.98	-0.58	0.22	-2.71	0.0066	0.0635	non-significant	mmu-miR-148b-3p	canonical	other
mmu-miR-148b-3p-0-1-T	1231.6	-0.52	0.17	-3.05	0.0023	0.0326	non-significant	mmu-miR-148b-3p	NT tail	U
mmu-miR-148b-3p-0-3-TTT	187.7	0.19	0.3	0.62	0.5355	0.7917	non-significant	mmu-miR-148b-3p	NT tail	UUU
mmu-miR-148b-3p-1-0--	93.51	-0.21	0.31	-0.66	0.5093	0.7678	non-significant	mmu-miR-148b-3p	trimmed	other
mmu-miR-148b-3p-0-2-TA	102.13	-0.36	0.38	-0.94	0.3452	0.6277	non-significant	mmu-miR-148b-3p	NT tail	UA
mmu-miR-148b-3p-0-1-C	83.26	0.26	0.34	0.76	0.4474	0.7284	non-significant	mmu-miR-148b-3p	ambiguous tail	C
mmu-miR-148b-3p-0-1-A	35.1	-0.23	0.68	-0.33	0.7383	0.8989	non-significant	mmu-miR-148b-3p	NT tail	A
mmu-miR-148b-3p-3-0--	21.48	0.62	0.61	1.01	0.3138	0.5991	non-significant	mmu-miR-148b-3p	trimmed	other
mmu-miR-148b-3p-0-2-TC	12.48	-0.62	0.68	-0.92	0.3568		non-significant	mmu-miR-148b-3p	NT tail	other
mmu-miR-193b-3p-0-0--	131.81	-1.19	0.34	-3.55	0.0004	0.0108	significant	mmu-miR-193b-3p	canonical	other
mmu-miR-193b-3p-0-1-T	91.86	-1.73	0.45	-3.84	0.0001	0.005	significant	mmu-miR-193b-3p	ambiguous tail	U
mmu-miR-193b-3p-0-2-TT	33.95	-1.05	0.73	-1.43	0.1513	0.407	non-significant	mmu-miR-193b-3p	ambiguous tail	UU
mmu-miR-193b-3p-1-0--	8.02	-1.68	1.03	-1.64	0.1013		non-significant	mmu-miR-193b-3p	trimmed	other
mmu-miR-193b-3p-0-3-TTT	3.74	-0.82	1.29	-0.63	0.5277		non-significant	mmu-miR-193b-3p	ambiguous tail	UUU
mmu-miR-484-1-0--	1794.15	-1.18	0.62	-1.9	0.0574	0.2458	non-significant	mmu-miR-484	trimmed	other
mmu-miR-484-0-0--	1626.06	-1.12	0.65	-1.73	0.0832	0.2959	non-significant	mmu-miR-484	canonical	other
mmu-miR-484-0-1-T	374.73	-1.19	0.64	-1.87	0.0616	0.2545	non-significant	mmu-miR-484	NT tail	U
mmu-miR-484-0-1-A	442.97	-1.45	0.76	-1.92	0.0553	0.2419	non-significant	mmu-miR-484	ambiguous tail	A
mmu-miR-484-2-2-TT	139.29	-0.98	0.35	-2.8	0.0051	0.0544	non-significant	mmu-miR-484	ambiguous tail	UU
mmu-miR-484-2-3-TTT	33.25	-0.98	0.48	-2.02	0.0431	0.2079	non-significant	mmu-miR-484	ambiguous tail	UUU
mmu-miR-484-1-2-AA	133.38	-2.35	0.63	-3.73	0.0002	0.0062	significant	mmu-miR-484	ambiguous tail	AA
mmu-miR-484-0-2-TT	23.42	-1.14	0.59	-1.92	0.0545	0.2396	non-significant	mmu-miR-484	NT tail	UU
mmu-miR-484-1-1-A	72.1	-0.91	0.85	-1.07	0.2853	0.5732	non-significant	mmu-miR-484	ambiguous tail	A
mmu-miR-484-2-1-T	21.13	-0.87	0.63	-1.38	0.1687	0.4324	non-significant	mmu-miR-484	ambiguous tail	U
mmu-miR-484-0-2-AA	17.26	-1.89	1.35	-1.4	0.1618		non-significant	mmu-miR-484	ambiguous tail	AA
mmu-miR-484-0-2-AT	19.06	-1.56	0.87	-1.79	0.0736	0.2771	non-significant	mmu-miR-484	NT tail	AU
mmu-miR-484-2-1-G	22.62	-0.19	0.89	-0.21	0.8333	0.9333	non-significant	mmu-miR-484	ambiguous tail	G
mmu-miR-484-2-0--	14.8	0.4	0.86	0.47	0.636		non-significant	mmu-miR-484	trimmed	other
mmu-miR-130b-3p-0-1-T	81.85	0.01	0.39	0.04	0.9711	0.9866	non-significant	mmu-miR-130b-3p	NT tail	U
mmu-miR-130b-3p-0-0--	31.72	0.37	0.51	0.73	0.4669	0.7429	non-significant	mmu-miR-130b-3p	canonical	other
mmu-miR-130b-3p-2-0--	14.48	0.71	0.72	0.98	0.3287		non-significant	mmu-miR-130b-3p	trimmed	other
mmu-miR-130b-3p-1-0--	11.09	1.3	0.78	1.66	0.0976		non-significant	mmu-miR-130b-3p	trimmed	other
mmu-miR-130b-5p-0-0--	49.29	-0.19	0.64	-0.29	0.7688	0.9079	non-significant	mmu-miR-130b-5p	canonical	other
mmu-miR-130b-5p-0-1-G	4.16	-0.41	1.23	-0.33	0.7397		non-significant	mmu-miR-130b-5p	NT tail	G
mmu-miR-130b-5p-2-0--	1.23	-1.92	2.22	-0.87	0.3867		non-significant	mmu-miR-130b-5p	trimmed	other
mmu-miR-130b-5p-1-0--	2.6	0.33	2.01	0.17	0.8682		non-significant	mmu-miR-130b-5p	trimmed	other
mmu-miR-301b-3p-0-0--	33.77	0.51	0.63	0.81	0.4204	0.7036	non-significant	mmu-miR-301b-3p	canonical	other
mmu-miR-185-3p-0-0--	31.23	-1.31	0.46	-2.81	0.005	0.0535	non-significant	mmu-miR-185-3p	canonical	other
mmu-miR-185-3p-0-1-T	8.81	-0.81	0.9	-0.9	0.3696		non-significant	mmu-miR-185-3p	NT tail	U
mmu-miR-185-3p-0-1-A	5.49	-0.06	1.33	-0.04	0.9659		non-significant	mmu-miR-185-3p	NT tail	A
mmu-miR-185-5p-1-2-TT	254.24	0.9	0.55	1.64	0.1002	0.3271	non-significant	mmu-miR-185-5p	ambiguous tail	UU
mmu-miR-185-5p-0-0--	254.17	0.45	0.4	1.14	0.2557	0.5422	non-significant	mmu-miR-185-5p	canonical	other
mmu-miR-185-5p-1-1-T	116.26	0.69	0.63	1.1	0.2707	0.5587	non-significant	mmu-miR-185-5p	ambiguous tail	U
mmu-miR-185-5p-1-0--	101.48	0.9	0.36	2.51	0.0119	0.0946	non-significant	mmu-miR-185-5p	trimmed	other
mmu-miR-185-5p-2-0--	60.16	0.71	0.49	1.46	0.1435	0.3917	non-significant	mmu-miR-185-5p	trimmed	other
mmu-miR-185-5p-0-1-T	66.86	0.48	0.48	0.99	0.3208	0.6087	non-significant	mmu-miR-185-5p	NT tail	U
mmu-miR-185-5p-0-2-TT	22.25	0.13	0.64	0.2	0.8426	0.9365	non-significant	mmu-miR-185-5p	NT tail	UU
mmu-miR-185-5p-0-2-AC	73.63	-0.45	1.32	-0.34	0.7316	0.8989	non-significant	mmu-miR-185-5p	NT tail	other
mmu-miR-185-5p-1-3-TTT	15.14	1.49	0.74	2.01	0.0448		non-significant	mmu-miR-185-5p	ambiguous tail	UUU
mmu-miR-185-5p-3-0--	19.54	1.65	0.83	2	0.0457	0.2153	non-significant	mmu-miR-185-5p	trimmed	other
mmu-miR-185-5p-0-1-A	21.98	-0.49	1.06	-0.47	0.6413	0.8572	non-significant	mmu-miR-185-5p	NT tail	A
mmu-miR-185-5p-0-2-AT	26.09	-0.84	0.76	-1.11	0.266	0.5531	non-significant	mmu-miR-185-5p	NT tail	AU
mmu-miR-185-5p-1-2-TA	10.57	-0.55	1.11	-0.5	0.6192		non-significant	mmu-miR-185-5p	ambiguous tail	UA
mmu-miR-185-5p-2-1-T	4.65	1.37	1.46	0.94	0.3465		non-significant	mmu-miR-185-5p	ambiguous tail	U
mmu-miR-185-5p-0-2-TA	6.15	0.69	1.2	0.58	0.5648		non-significant	mmu-miR-185-5p	NT tail	UA
mmu-miR-185-5p-0-1-C	5.53	2.12	1.37	1.55	0.121		non-significant	mmu-miR-185-5p	NT tail	C
mmu-miR-185-5p-0-2-AA	16.36	-0.94	1.02	-0.93	0.3542		non-significant	mmu-miR-185-5p	NT tail	AA
mmu-miR-1224-5p-0-1-G	100.4	-1.09	0.39	-2.77	0.0055	0.0569	non-significant	mmu-miR-1224-5p	ambiguous tail	G
mmu-miR-1224-5p-0-0--	79.22	-1.07	0.46	-2.33	0.0196	0.1305	non-significant	mmu-miR-1224-5p	canonical	other
mmu-miR-1224-5p-1-0--	60.63	-0.46	0.48	-0.96	0.3369	0.6214	non-significant	mmu-miR-1224-5p	trimmed	other
mmu-miR-1224-5p-2-0--	45	-0.22	0.44	-0.5	0.6189	0.844	non-significant	mmu-miR-1224-5p	trimmed	other
mmu-miR-1224-5p-0-2-GG	35.41	-1.17	0.58	-2.02	0.0435	0.2087	non-significant	mmu-miR-1224-5p	ambiguous tail	other
mmu-miR-1224-5p-0-1-T	30.46	-1.13	0.54	-2.08	0.0377	0.1925	non-significant	mmu-miR-1224-5p	NT tail	U
mmu-miR-1224-5p-0-3-GGT	23.55	-1.18	0.64	-1.84	0.0663	0.2624	non-significant	mmu-miR-1224-5p	ambiguous tail	other
mmu-miR-1224-5p-0-1-A	21.32	-1.39	0.78	-1.77	0.0763	0.2807	non-significant	mmu-miR-1224-5p	NT tail	A
mmu-miR-1224-5p-1-1-T	12.67	-0.6	0.67	-0.9	0.3687		non-significant	mmu-miR-1224-5p	ambiguous tail	U
mmu-miR-1224-5p-1-1-A	7.31	-0.43	0.94	-0.46	0.6436		non-significant	mmu-miR-1224-5p	ambiguous tail	A
mmu-miR-1224-5p-3-0--	4.62	0.14	1.18	0.12	0.9038		non-significant	mmu-miR-1224-5p	trimmed	other
mmu-miR-1224-5p-1-2-AA	3.96	-0.68	1.28	-0.54	0.5925		non-significant	mmu-miR-1224-5p	ambiguous tail	AA
mmu-miR-1224-5p-0-3-GGA	1.41	-2.58	2.58	-1	0.3183		non-significant	mmu-miR-1224-5p	NT tail	other
mmu-miR-1224-5p-1-2-AT	3.85	-1.54	1.57	-0.98	0.3248		non-significant	mmu-miR-1224-5p	ambiguous tail	AU
mmu-miR-1224-3p-0-1-T	90.55	-0.88	0.39	-2.26	0.0239	0.1455	non-significant	mmu-miR-1224-3p	NT tail	U
mmu-miR-1224-3p-0-0--	12.25	0.16	1.07	0.15	0.8825		non-significant	mmu-miR-1224-3p	canonical	other
mmu-miR-1224-3p-0-1-A	5.34	-2.75	1.63	-1.68	0.0922		non-significant	mmu-miR-1224-3p	NT tail	A
mmu-miR-1224-3p-0-2-TA	4.01	-2.74	2.15	-1.27	0.2025		non-significant	mmu-miR-1224-3p	NT tail	UA
mmu-miR-28a-3p-0-0--	49.67	0.03	0.54	0.06	0.9505	0.9804	non-significant	mmu-miR-28a-3p	canonical	other
mmu-miR-28a-3p-0-1-A	13.58	0.48	0.78	0.61	0.5392		non-significant	mmu-miR-28a-3p	NT tail	A
mmu-miR-28a-3p-1-0--	13.7	1.09	0.71	1.52	0.1278		non-significant	mmu-miR-28a-3p	trimmed	other
mmu-miR-28a-3p-0-1-T	8.1	0.26	1.1	0.24	0.811		non-significant	mmu-miR-28a-3p	NT tail	U
mmu-miR-28a-3p-0-2-AA	0.96	-1.89	3.3	-0.57	0.5667		non-significant	mmu-miR-28a-3p	NT tail	AA
mmu-miR-690-3-0--	16.53	0.45	0.65	0.7	0.4841		non-significant	mmu-miR-690	trimmed	other
mmu-miR-1947-5p-1-0--	97.27	-0.3	0.31	-0.95	0.3415	0.6248	non-significant	mmu-miR-1947-5p	trimmed	other
mmu-miR-1947-5p-2-0--	11.84	0.05	0.85	0.06	0.954		non-significant	mmu-miR-1947-5p	trimmed	other
mmu-miR-6540-3p-0-0--	4.99	-0.22	1.18	-0.18	0.8545		non-significant	mmu-miR-6540-3p	canonical	other
mmu-miR-6540-5p-1-0--	97.72	-0.12	0.44	-0.28	0.7777	0.9082	non-significant	mmu-miR-6540-5p	trimmed	other
mmu-miR-6540-5p-0-1-T	55.56	0.34	0.61	0.56	0.5748	0.8163	non-significant	mmu-miR-6540-5p	NT tail	U
mmu-miR-6540-5p-0-0--	10.04	-0.29	0.87	-0.33	0.7435		non-significant	mmu-miR-6540-5p	canonical	other
mmu-miR-6540-5p-0-1-A	16.94	-0.33	0.58	-0.56	0.5752		non-significant	mmu-miR-6540-5p	NT tail	A
mmu-miR-6540-5p-0-2-TT	1.95	-0.54	1.79	-0.3	0.7621		non-significant	mmu-miR-6540-5p	NT tail	UU
mmu-miR-3470b-0-3-CCT	1.17	-0.41	2.29	-0.18	0.8581		non-significant	mmu-miR-3470b	ambiguous tail	other
mmu-miR-99a-3p-0-0--	76.05	0.09	0.32	0.27	0.7835	0.9082	non-significant	mmu-miR-99a-3p	canonical	other
mmu-miR-99a-3p-0-2-GT	63.8	-0.56	0.35	-1.61	0.1083	0.3425	non-significant	mmu-miR-99a-3p	ambiguous tail	other
mmu-miR-99a-3p-0-1-G	7.43	-0.56	0.86	-0.65	0.5164		non-significant	mmu-miR-99a-3p	ambiguous tail	G
mmu-miR-99a-3p-2-0--	6.74	1.57	0.99	1.59	0.112		non-significant	mmu-miR-99a-3p	trimmed	other
mmu-miR-99a-3p-1-0--	18.32	0.53	0.8	0.66	0.5065	0.766	non-significant	mmu-miR-99a-3p	trimmed	other
mmu-miR-99a-3p-0-3-GTT	3.83	-0.66	1.11	-0.6	0.5503		non-significant	mmu-miR-99a-3p	NT tail	other
mmu-miR-99a-3p-0-2-GA	1.35	-1.3	3.13	-0.42	0.6775		non-significant	mmu-miR-99a-3p	NT tail	other
mmu-let-7c-1-3p-0-0--	12.31	0.68	1.18	0.58	0.5645		non-significant	mmu-let-7c-1-3p	canonical	other
mmu-let-7c-1-3p-0-1-T	7.98	0.54	0.93	0.58	0.5613		non-significant	mmu-let-7c-1-3p	ambiguous tail	U
mmu-miR-125b-2-3p-1-0--	5507.75	-0.25	0.31	-0.83	0.4054	0.6887	non-significant	mmu-miR-125b-2-3p	trimmed	other
mmu-miR-125b-2-3p-2-1-T	2793.83	0.21	0.21	0.98	0.325	0.6129	non-significant	mmu-miR-125b-2-3p	ambiguous tail	U
mmu-miR-125b-2-3p-0-0--	685.46	-0.27	0.24	-1.16	0.246	0.5307	non-significant	mmu-miR-125b-2-3p	canonical	other
mmu-miR-125b-2-3p-2-0--	349.41	0.53	0.31	1.72	0.0858	0.3005	non-significant	mmu-miR-125b-2-3p	trimmed	other
mmu-miR-125b-2-3p-0-2-TT	147.43	-0.31	0.34	-0.9	0.3684	0.6509	non-significant	mmu-miR-125b-2-3p	NT tail	UU
mmu-miR-125b-2-3p-0-1-T	92.83	-0.31	0.33	-0.93	0.3516	0.6323	non-significant	mmu-miR-125b-2-3p	NT tail	U
mmu-miR-125b-2-3p-2-1-A	47.19	0.27	0.47	0.57	0.5675	0.8126	non-significant	mmu-miR-125b-2-3p	ambiguous tail	A
mmu-miR-125b-2-3p-1-3-ATT	21.77	-0.29	0.53	-0.55	0.5834	0.818	non-significant	mmu-miR-125b-2-3p	ambiguous tail	AUU
mmu-miR-125b-2-3p-1-1-G	22.65	1.29	0.56	2.31	0.0209	0.1359	non-significant	mmu-miR-125b-2-3p	ambiguous tail	G
mmu-miR-125b-2-3p-3-2-TT	18.67	-0.21	0.58	-0.36	0.7165	0.8935	non-significant	mmu-miR-125b-2-3p	ambiguous tail	UU
mmu-miR-99b-5p-1-0--	53043.4	-0.23	0.15	-1.56	0.1196	0.3614	non-significant	mmu-miR-99b-5p	trimmed	other
mmu-miR-99b-5p-0-0--	45232.1	-0.13	0.17	-0.76	0.4448	0.7279	non-significant	mmu-miR-99b-5p	canonical	other
mmu-miR-99b-5p-0-1-A	7088.74	-0.63	0.22	-2.82	0.0049	0.053	non-significant	mmu-miR-99b-5p	NT tail	A
mmu-miR-99b-5p-0-1-T	3365.2	0.12	0.62	0.19	0.8498	0.9386	non-significant	mmu-miR-99b-5p	NT tail	U
mmu-miR-99b-5p-2-0--	1918.26	0.02	0.3	0.06	0.9548	0.9834	non-significant	mmu-miR-99b-5p	trimmed	other
mmu-miR-99b-5p-1-1-A	1058.51	-0.68	0.27	-2.54	0.0111	0.0902	non-significant	mmu-miR-99b-5p	ambiguous tail	A
mmu-miR-99b-5p-3-0--	500.24	-0.28	0.32	-0.88	0.3805	0.6628	non-significant	mmu-miR-99b-5p	trimmed	other
mmu-miR-99b-5p-1-1-T	165.06	-0.23	0.4	-0.58	0.5636	0.8112	non-significant	mmu-miR-99b-5p	ambiguous tail	U
mmu-miR-99b-5p-0-2-AA	234.15	-0.71	0.44	-1.61	0.1079	0.3419	non-significant	mmu-miR-99b-5p	NT tail	AA
mmu-miR-99b-5p-0-2-TT	98.39	0.11	0.52	0.21	0.8316	0.9333	non-significant	mmu-miR-99b-5p	NT tail	UU
mmu-miR-99b-5p-2-1-A	129.77	-0.51	0.38	-1.33	0.1826	0.4483	non-significant	mmu-miR-99b-5p	ambiguous tail	A
mmu-miR-99b-5p-1-2-AA	99.11	-0.64	0.52	-1.24	0.2166	0.4908	non-significant	mmu-miR-99b-5p	ambiguous tail	AA
mmu-miR-99b-5p-0-1-C	52.15	-0.43	0.4	-1.07	0.2834	0.5701	non-significant	mmu-miR-99b-5p	NT tail	C
mmu-miR-99b-5p-2-1-T	62.17	-0.3	1.09	-0.28	0.7809	0.9082	non-significant	mmu-miR-99b-5p	ambiguous tail	U
mmu-miR-99b-5p-0-1-G	76.46	0.7	0.37	1.91	0.0558	0.2429	non-significant	mmu-miR-99b-5p	ambiguous tail	G
mmu-miR-99b-5p-0-2-AT	32.04	-1.25	0.92	-1.37	0.172	0.4347	non-significant	mmu-miR-99b-5p	NT tail	AU
mmu-miR-99b-5p-0-3-AAA	48.48	-5.29	1.33	-3.97	0.0001	0.0034	significant	mmu-miR-99b-5p	NT tail	AAA
mmu-miR-99b-5p-6-5-ATTGC	9.03	-0.79	1.98	-0.4	0.6914		non-significant	mmu-miR-99b-5p	ambiguous tail	other
mmu-miR-99b-5p-2-2-AA	11.58	-3.92	2.39	-1.64	0.1012		non-significant	mmu-miR-99b-5p	ambiguous tail	AA
mmu-miR-99b-5p-1-2-TT	14.88	-1.67	0.98	-1.71	0.0873		non-significant	mmu-miR-99b-5p	ambiguous tail	UU
mmu-miR-99b-5p-1-2-AT	30.17	-1.57	0.97	-1.61	0.1071	0.3419	non-significant	mmu-miR-99b-5p	ambiguous tail	AU
mmu-miR-99b-5p-8-7-GCCTTGC	7.14	-3.85	1.99	-1.93	0.0532		non-significant	mmu-miR-99b-5p	ambiguous tail	other
mmu-miR-99b-5p-0-3-TAA	10.77	-3.42	2.18	-1.57	0.1174		non-significant	mmu-miR-99b-5p	NT tail	UAA
mmu-miR-99b-3p-2-1-T	52.8	-0.26	0.49	-0.53	0.5983	0.8312	non-significant	mmu-miR-99b-3p	ambiguous tail	U
mmu-miR-99b-3p-0-1-T	34.82	-0.88	0.54	-1.63	0.1035	0.3346	non-significant	mmu-miR-99b-3p	ambiguous tail	U
mmu-miR-99b-3p-3-1-T	33.35	0.52	0.63	0.83	0.4041	0.6887	non-significant	mmu-miR-99b-3p	ambiguous tail	U
mmu-miR-99b-3p-0-2-TT	20.96	0.24	0.53	0.45	0.65	0.8622	non-significant	mmu-miR-99b-3p	NT tail	UU
mmu-miR-99b-3p-1-1-T	20.36	0.88	0.57	1.53	0.1258	0.3711	non-significant	mmu-miR-99b-3p	ambiguous tail	U
mmu-miR-99b-3p-1-0--	13.02	-0.81	0.75	-1.08	0.2801		non-significant	mmu-miR-99b-3p	trimmed	other
mmu-miR-99b-3p-0-0--	20.35	-0.25	0.55	-0.45	0.6552	0.8632	non-significant	mmu-miR-99b-3p	canonical	other
mmu-miR-99b-3p-2-0--	17.79	-0.08	0.98	-0.09	0.9311	0.9745	non-significant	mmu-miR-99b-3p	trimmed	other
mmu-miR-99b-3p-3-0--	10.29	1.23	1	1.23	0.2186		non-significant	mmu-miR-99b-3p	trimmed	other
mmu-miR-99b-3p-0-1-G	2.96	-1.58	1.39	-1.14	0.2555		non-significant	mmu-miR-99b-3p	NT tail	G
mmu-miR-99b-3p-0-3-ATT	2.14	-1.87	2.8	-0.67	0.5035		non-significant	mmu-miR-99b-3p	NT tail	AUU
mmu-miR-99b-3p-0-1-A	5.57	-3.34	2.19	-1.53	0.127		non-significant	mmu-miR-99b-3p	NT tail	A
mmu-let-7e-3p-0-1-T	49.37	0.12	0.59	0.21	0.8357	0.9333	non-significant	mmu-let-7e-3p	NT tail	U
mmu-let-7e-3p-0-0--	47.07	-0.59	0.4	-1.46	0.1439	0.3917	non-significant	mmu-let-7e-3p	canonical	other
mmu-let-7e-3p-1-0--	7.68	-0.02	1.08	-0.02	0.9879		non-significant	mmu-let-7e-3p	trimmed	other
mmu-let-7e-3p-1-1-T	6.1	0.45	0.93	0.49	0.6249		non-significant	mmu-let-7e-3p	ambiguous tail	U
mmu-let-7e-3p-0-1-A	1.66	-0.9	1.63	-0.55	0.5829		non-significant	mmu-let-7e-3p	NT tail	A
mmu-miR-125a-3p-0-0--	59.49	0.68	0.52	1.32	0.1853	0.4515	non-significant	mmu-miR-125a-3p	canonical	other
mmu-miR-125a-3p-1-0--	42.14	0.41	0.49	0.83	0.4045	0.6887	non-significant	mmu-miR-125a-3p	trimmed	other
mmu-miR-125a-3p-0-1-T	8.85	-0.16	1	-0.16	0.8708		non-significant	mmu-miR-125a-3p	ambiguous tail	U
mmu-miR-125a-3p-2-0--	11.66	0.36	0.78	0.47	0.6416		non-significant	mmu-miR-125a-3p	trimmed	other
mmu-miR-3547-3p-0-1-T	9.56	-3.49	1.2	-2.92	0.0035		non-significant	mmu-miR-3547-3p	NT tail	U
mmu-miR-3082-3p-0-1-T	54.84	-0.59	0.54	-1.09	0.2745	0.5611	non-significant	mmu-miR-3082-3p	NT tail	U
mmu-miR-3082-3p-0-0--	45.17	-0.62	0.44	-1.41	0.1587	0.4153	non-significant	mmu-miR-3082-3p	canonical	other
mmu-miR-3082-3p-1-0--	10.6	-0.44	0.72	-0.62	0.5384		non-significant	mmu-miR-3082-3p	trimmed	other
mmu-miR-3082-3p-1-1-T	5.2	-0.58	1	-0.58	0.5593		non-significant	mmu-miR-3082-3p	ambiguous tail	U
mmu-miR-3082-3p-0-2-TT	1.63	-0.44	1.77	-0.25	0.802		non-significant	mmu-miR-3082-3p	NT tail	UU
mmu-miR-3082-3p-2-0--	4.25	-0.74	1.25	-0.59	0.5544		non-significant	mmu-miR-3082-3p	trimmed	other
mmu-miR-3083-5p-0-1-A	1.5	-0.19	2.21	-0.09	0.9306		non-significant	mmu-miR-3083-5p	NT tail	A
mmu-miR-3083-5p-1-0--	3.88	0.91	1.25	0.72	0.4685		non-significant	mmu-miR-3083-5p	trimmed	other
mmu-miR-3083b-3p-1-0--	13.99	-0.44	0.7	-0.63	0.5291		non-significant	mmu-miR-3083b-3p	trimmed	other
mmu-miR-219a-1-3p-0-1-A	7.88	-4.04	2.06	-1.96	0.0495		non-significant	mmu-miR-219a-1-3p	NT tail	A
mmu-miR-219a-5p-1-2-0-2-TG	14.16	-0.61	1.05	-0.58	0.561		non-significant	mmu-miR-219a-5p-1-2	NT tail	other
mmu-miR-219a-5p-1-2-0-0--	4.72	-1.72	1.92	-0.9	0.37		non-significant	mmu-miR-219a-5p-1-2	canonical	other
mmu-miR-219a-5p-1-2-0-1-T	11.51	-0.58	0.74	-0.78	0.4331		non-significant	mmu-miR-219a-5p-1-2	NT tail	U
mmu-miR-219a-5p-1-2-7-8-TAATTCTT	14.81	0.52	0.63	0.82	0.4119		non-significant	mmu-miR-219a-5p-1-2	ambiguous tail	other
mmu-miR-219a-5p-1-2-1-0--	1.57	-0.75	1.92	-0.39	0.6973		non-significant	mmu-miR-219a-5p-1-2	trimmed	other
mmu-miR-6971-3p-0-1-T	27.52	-0.14	0.51	-0.27	0.785	0.9084	non-significant	mmu-miR-6971-3p	NT tail	U
mmu-miR-6971-3p-0-0--	2.97	0	1.53	0	1		non-significant	mmu-miR-6971-3p	canonical	other
mmu-miR-6975-3p-0-1-T	14.26	-0.53	0.68	-0.77	0.4394		non-significant	mmu-miR-6975-3p	ambiguous tail	U
mmu-miR-877-3p-0-1-G	82.04	-0.74	0.44	-1.68	0.0921	0.3123	non-significant	mmu-miR-877-3p	NT tail	G
mmu-miR-877-3p-0-2-GT	76.64	-0.65	0.49	-1.31	0.1912	0.4606	non-significant	mmu-miR-877-3p	NT tail	other
mmu-miR-877-3p-0-0--	60.66	-0.86	0.47	-1.83	0.0666	0.2626	non-significant	mmu-miR-877-3p	canonical	other
mmu-miR-877-3p-0-1-T	57.37	-0.27	0.54	-0.49	0.6215	0.8451	non-significant	mmu-miR-877-3p	NT tail	U
mmu-miR-877-3p-1-0--	23.28	-1.15	0.73	-1.57	0.1163	0.3559	non-significant	mmu-miR-877-3p	trimmed	other
mmu-miR-877-3p-2-0--	16.82	-0.06	0.69	-0.09	0.927		non-significant	mmu-miR-877-3p	trimmed	other
mmu-miR-877-3p-0-2-TT	18.53	-1.62	0.62	-2.6	0.0094	0.0804	non-significant	mmu-miR-877-3p	NT tail	UU
mmu-miR-877-3p-1-1-T	5.95	-0.59	1.16	-0.51	0.6108		non-significant	mmu-miR-877-3p	ambiguous tail	U
mmu-miR-877-3p-0-3-GTT	4.63	-1.03	1.29	-0.8	0.4253		non-significant	mmu-miR-877-3p	NT tail	other
mmu-miR-877-3p-0-2-GA	24.81	-0.91	1.31	-0.69	0.4874	0.7501	non-significant	mmu-miR-877-3p	NT tail	other
mmu-miR-877-3p-0-1-A	4.26	-2.46	2.18	-1.13	0.2582		non-significant	mmu-miR-877-3p	NT tail	A
mmu-miR-877-5p-0-2-GA	53.85	-0.43	0.61	-0.7	0.4815	0.7476	non-significant	mmu-miR-877-5p	NT tail	other
mmu-miR-877-5p-0-3-GAT	14.92	-0.33	0.65	-0.51	0.6086		non-significant	mmu-miR-877-5p	NT tail	other
mmu-miR-877-5p-0-0--	8	-1.32	0.96	-1.38	0.1684		non-significant	mmu-miR-877-5p	canonical	other
mmu-miR-877-5p-0-1-G	6.85	0.28	0.96	0.29	0.7707		non-significant	mmu-miR-877-5p	NT tail	G
mmu-miR-877-5p-0-3-GAA	11.95	0.11	0.76	0.14	0.8848		non-significant	mmu-miR-877-5p	NT tail	other
mmu-miR-877-5p-0-3-GAC	6.36	0.19	0.96	0.2	0.8427		non-significant	mmu-miR-877-5p	NT tail	other
mmu-miR-877-5p-0-2-AA	8.58	-3.02	1.54	-1.96	0.0501		non-significant	mmu-miR-877-5p	NT tail	AA
mmu-miR-877-5p-1-1-A	1.45	-1.06	2.48	-0.43	0.6674		non-significant	mmu-miR-877-5p	ambiguous tail	A
mmu-miR-877-5p-0-1-T	1.87	-1.07	1.81	-0.59	0.5541		non-significant	mmu-miR-877-5p	NT tail	U
mmu-miR-877-5p-0-1-A	7.06	0.08	1.13	0.07	0.9436		non-significant	mmu-miR-877-5p	NT tail	A
mmu-miR-877-5p-0-3-AAT	2.61	-0.63	1.62	-0.39	0.697		non-significant	mmu-miR-877-5p	NT tail	AAU
mmu-miR-6976-3p-0-1-T	5.87	-0.14	0.97	-0.15	0.8816		non-significant	mmu-miR-6976-3p	NT tail	U
mmu-miR-7b-5p-0-0--	2003.16	0.53	0.28	1.89	0.0587	0.2485	non-significant	mmu-miR-7b-5p	canonical	other
mmu-miR-7b-5p-1-0--	728.28	0.49	0.35	1.4	0.1629	0.4212	non-significant	mmu-miR-7b-5p	trimmed	other
mmu-miR-7b-5p-2-0--	45.69	0.74	0.52	1.43	0.1525	0.407	non-significant	mmu-miR-7b-5p	trimmed	other
mmu-miR-7b-5p-3-0--	63.67	0.79	0.43	1.84	0.0657	0.2615	non-significant	mmu-miR-7b-5p	trimmed	other
mmu-miR-7b-5p-0-1-T	9.01	0.24	0.84	0.29	0.7739		non-significant	mmu-miR-7b-5p	NT tail	U
mmu-miR-7b-3p-0-0--	17.03	-0.45	0.72	-0.62	0.5357		non-significant	mmu-miR-7b-3p	canonical	other
mmu-miR-7b-3p-2-0--	6.52	0.01	1.07	0.01	0.9931		non-significant	mmu-miR-7b-3p	trimmed	other
mmu-miR-7b-3p-1-0--	13.55	0.61	0.88	0.7	0.4863		non-significant	mmu-miR-7b-3p	trimmed	other
mmu-miR-6977-3p-0-1-T	12.48	-1.28	0.95	-1.35	0.1784		non-significant	mmu-miR-6977-3p	NT tail	U
mmu-miR-6977-3p-0-0--	2.74	0.12	1.65	0.07	0.9419		non-significant	mmu-miR-6977-3p	canonical	other
mmu-miR-1948-3p-0-0--	12.84	0.36	0.7	0.52	0.6057		non-significant	mmu-miR-1948-3p	canonical	other
mmu-miR-187-3p-2-1-T	93.4	0.48	0.43	1.11	0.2671	0.5542	non-significant	mmu-miR-187-3p	ambiguous tail	U
mmu-miR-187-3p-0-0--	62.72	-0.16	0.36	-0.45	0.6526	0.8622	non-significant	mmu-miR-187-3p	canonical	other
mmu-miR-187-3p-1-0--	69.33	0.08	0.31	0.25	0.801	0.9197	non-significant	mmu-miR-187-3p	trimmed	other
mmu-miR-187-3p-1-1-T	38.36	-0.14	0.41	-0.34	0.7367	0.8989	non-significant	mmu-miR-187-3p	ambiguous tail	U
mmu-miR-187-3p-0-1-T	43.46	-0.12	0.43	-0.28	0.7799	0.9082	non-significant	mmu-miR-187-3p	NT tail	U
mmu-miR-187-3p-2-0--	46.48	0.59	0.52	1.13	0.2597	0.547	non-significant	mmu-miR-187-3p	trimmed	other
mmu-miR-187-3p-3-0--	27.47	1.36	0.59	2.3	0.0213	0.1361	non-significant	mmu-miR-187-3p	trimmed	other
mmu-miR-187-3p-0-1-A	57.6	-0.71	0.69	-1.03	0.3012	0.5903	non-significant	mmu-miR-187-3p	NT tail	A
mmu-miR-187-3p-1-2-TT	11.23	-0.16	0.69	-0.23	0.8146		non-significant	mmu-miR-187-3p	ambiguous tail	UU
mmu-miR-187-3p-0-2-TT	5.97	-0.75	1.04	-0.72	0.4724		non-significant	mmu-miR-187-3p	NT tail	UU
mmu-miR-187-3p-0-2-AA	11.12	-3.1	1.21	-2.56	0.0106		non-significant	mmu-miR-187-3p	NT tail	AA
mmu-miR-187-3p-0-3-TTT	2.63	-0.25	1.6	-0.15	0.8778		non-significant	mmu-miR-187-3p	NT tail	UUU
mmu-miR-187-3p-1-3-TTT	2.22	-0.41	1.65	-0.25	0.8033		non-significant	mmu-miR-187-3p	ambiguous tail	UUU
mmu-miR-187-3p-0-3-TAT	2.89	-1.38	1.73	-0.79	0.4269		non-significant	mmu-miR-187-3p	NT tail	UAU
mmu-miR-187-3p-0-1-G	2.72	-0.45	1.46	-0.31	0.7586		non-significant	mmu-miR-187-3p	NT tail	G
mmu-miR-187-3p-0-3-ATT	5.42	1.36	1.78	0.76	0.4462		non-significant	mmu-miR-187-3p	NT tail	AUU
mmu-miR-187-3p-0-2-AT	7.34	-2.05	1.32	-1.55	0.1215		non-significant	mmu-miR-187-3p	NT tail	AU
mmu-miR-187-5p-0-1-T	18.66	-0.1	0.82	-0.12	0.9062	0.9694	non-significant	mmu-miR-187-5p	NT tail	U
mmu-miR-187-5p-0-0--	24.08	0.64	0.67	0.96	0.3376	0.6217	non-significant	mmu-miR-187-5p	canonical	other
mmu-miR-187-5p-1-0--	10.55	0.51	0.84	0.6	0.5458		non-significant	mmu-miR-187-5p	trimmed	other
mmu-miR-187-5p-0-1-A	15.79	-1.23	1.12	-1.11	0.2689		non-significant	mmu-miR-187-5p	NT tail	A
mmu-miR-187-5p-1-1-T	4.22	-2.17	1.37	-1.59	0.1128		non-significant	mmu-miR-187-5p	ambiguous tail	U
mmu-miR-187-5p-1-1-A	2.95	-0.95	2.63	-0.36	0.7182		non-significant	mmu-miR-187-5p	ambiguous tail	A
mmu-miR-1258-5p-0-0--	3.95	0.28	1.4	0.2	0.8406		non-significant	mmu-miR-1258-5p	canonical	other
mmu-miR-7220-5p-0-0--	68.66	-0.38	0.41	-0.91	0.3615	0.6427	non-significant	mmu-miR-7220-5p	canonical	other
mmu-miR-7220-5p-1-0--	17.35	1.3	0.71	1.81	0.0699	0.2689	non-significant	mmu-miR-7220-5p	trimmed	other
mmu-miR-7220-5p-0-1-A	3.34	0.22	1.53	0.15	0.8832		non-significant	mmu-miR-7220-5p	NT tail	A
mmu-miR-6982-3p-0-1-T	7.58	-1.99	1.1	-1.81	0.0701		non-significant	mmu-miR-6982-3p	ambiguous tail	U
mmu-miR-378a-5p-0-0--	74.91	-1.88	0.36	-5.24	0	0	significant	mmu-miR-378a-5p	canonical	other
mmu-miR-378a-5p-1-1-G	9.94	-0.36	0.83	-0.43	0.6638		non-significant	mmu-miR-378a-5p	ambiguous tail	G
mmu-miR-378a-5p-1-0--	3.76	-0.51	1.31	-0.39	0.6967		non-significant	mmu-miR-378a-5p	trimmed	other
mmu-miR-145a-3p-1-0--	81.97	0.51	0.48	1.08	0.2812	0.5668	non-significant	mmu-miR-145a-3p	trimmed	other
mmu-miR-145a-3p-2-1-C	15.29	0.7	0.82	0.86	0.3924		non-significant	mmu-miR-145a-3p	ambiguous tail	C
mmu-miR-145a-3p-2-0--	19.51	0.06	0.73	0.08	0.9378	0.9756	non-significant	mmu-miR-145a-3p	trimmed	other
mmu-miR-145a-3p-3-0--	7.87	-0.92	1.14	-0.81	0.4193		non-significant	mmu-miR-145a-3p	trimmed	other
mmu-miR-145a-3p-2-1-A	4.5	-1.36	1.85	-0.74	0.4606		non-significant	mmu-miR-145a-3p	ambiguous tail	A
mmu-miR-145a-3p-2-1-G	3.05	-1.25	2.55	-0.49	0.6244		non-significant	mmu-miR-145a-3p	ambiguous tail	G
mmu-miR-143-3p-1-0--	64588.7	0.39	0.32	1.2	0.2298	0.5105	non-significant	mmu-miR-143-3p	trimmed	other
mmu-miR-143-3p-0-1-T	9042.51	0.1	0.33	0.29	0.7723	0.9082	non-significant	mmu-miR-143-3p	NT tail	U
mmu-miR-143-3p-0-0--	6957.97	0.15	0.35	0.42	0.6769	0.874	non-significant	mmu-miR-143-3p	canonical	other
mmu-miR-143-3p-2-0--	6581.92	0.45	0.39	1.16	0.2443	0.5297	non-significant	mmu-miR-143-3p	trimmed	other
mmu-miR-143-3p-0-2-TT	2568.39	0.15	0.31	0.5	0.6194	0.844	non-significant	mmu-miR-143-3p	NT tail	UU
mmu-miR-143-3p-1-1-T	1635.58	0.3	0.37	0.83	0.409	0.6929	non-significant	mmu-miR-143-3p	ambiguous tail	U
mmu-miR-143-3p-0-1-A	1063.33	0.02	0.33	0.05	0.958	0.9834	non-significant	mmu-miR-143-3p	NT tail	A
mmu-miR-143-3p-3-0--	811.63	0.91	0.35	2.58	0.0099	0.0835	non-significant	mmu-miR-143-3p	trimmed	other
mmu-miR-143-3p-2-1-G	497.41	1.89	0.49	3.81	0.0001	0.0052	significant	mmu-miR-143-3p	ambiguous tail	G
mmu-miR-143-3p-1-3-TTT	129.26	-0.13	0.38	-0.34	0.7328	0.8989	non-significant	mmu-miR-143-3p	ambiguous tail	UUU
mmu-miR-143-3p-0-3-TTT	109.46	0.12	0.35	0.33	0.7383	0.8989	non-significant	mmu-miR-143-3p	NT tail	UUU
mmu-miR-143-3p-1-2-TT	111.96	-0.01	0.34	-0.03	0.9729	0.9874	non-significant	mmu-miR-143-3p	ambiguous tail	UU
mmu-miR-143-3p-3-1-A	110.38	0.79	0.39	2.05	0.0401	0.1987	non-significant	mmu-miR-143-3p	ambiguous tail	A
mmu-miR-143-3p-2-1-A	59.21	0.1	0.5	0.19	0.8458	0.9369	non-significant	mmu-miR-143-3p	ambiguous tail	A
mmu-miR-143-3p-3-1-T	67.55	0.6	0.43	1.4	0.1601	0.4178	non-significant	mmu-miR-143-3p	ambiguous tail	U
mmu-miR-143-3p-0-1-C	39.68	-0.37	0.52	-0.71	0.4751	0.7468	non-significant	mmu-miR-143-3p	NT tail	C
mmu-miR-143-3p-1-1-A	69.01	-0.01	0.52	-0.03	0.9793	0.9912	non-significant	mmu-miR-143-3p	ambiguous tail	A
mmu-miR-143-3p-0-2-AT	68.54	0.16	0.4	0.41	0.6804	0.8741	non-significant	mmu-miR-143-3p	NT tail	AU
mmu-miR-143-3p-0-1-G	42.27	1.4	0.58	2.41	0.016	0.1153	non-significant	mmu-miR-143-3p	NT tail	G
mmu-miR-143-3p-1-3-ATT	16.61	0.08	1.12	0.07	0.9442		non-significant	mmu-miR-143-3p	ambiguous tail	AUU
mmu-miR-143-3p-8-7-AGTAGCT	13.63	-1.6	1.54	-1.04	0.2992		non-significant	mmu-miR-143-3p	ambiguous tail	other
mmu-miR-143-3p-3-4-TTCT	27.7	0.45	0.63	0.72	0.4699	0.7429	non-significant	mmu-miR-143-3p	ambiguous tail	other
mmu-miR-143-3p-1-1-G	23.54	-1.37	1.34	-1.02	0.3082	0.5945	non-significant	mmu-miR-143-3p	ambiguous tail	G
mmu-miR-143-3p-5-4-GGCT	13.12	-0.85	1.53	-0.56	0.5774		non-significant	mmu-miR-143-3p	ambiguous tail	other
mmu-miR-143-3p-1-2-AT	14.19	-1.14	1.39	-0.82	0.4111		non-significant	mmu-miR-143-3p	ambiguous tail	AU
mmu-miR-143-3p-0-2-TA	27.21	-4.02	3.46	-1.16	0.2447	0.5297	non-significant	mmu-miR-143-3p	NT tail	UA
mmu-miR-143-3p-3-2-AA	16.49	-1.37	1.49	-0.92	0.3586		non-significant	mmu-miR-143-3p	ambiguous tail	AA
mmu-miR-143-5p-0-3-TCT	7	-0.25	0.99	-0.26	0.7974		non-significant	mmu-miR-143-5p	NT tail	other
mmu-miR-143-5p-0-1-A	2.81	-2.13	1.66	-1.29	0.1986		non-significant	mmu-miR-143-5p	NT tail	A
mmu-miR-122-5p-1-0--	7.18	0.48	1.24	0.38	0.7008		non-significant	mmu-miR-122-5p	trimmed	other
mmu-miR-6985-3p-0-1-T	2.91	-3.24	1.91	-1.7	0.0897		non-significant	mmu-miR-6985-3p	NT tail	U
mmu-miR-6986-5p-1-0--	4.11	-1.34	1.4	-0.95	0.3411		non-significant	mmu-miR-6986-5p	trimmed	other
mmu-miR-6988-3p-0-1-T	40.06	-0.32	0.59	-0.54	0.589	0.8208	non-significant	mmu-miR-6988-3p	NT tail	U
mmu-miR-6988-3p-0-0--	2.36	-1.01	1.68	-0.6	0.5492		non-significant	mmu-miR-6988-3p	canonical	other
mmu-miR-6988-3p-0-1-A	1.16	-1.05	3.25	-0.32	0.7455		non-significant	mmu-miR-6988-3p	NT tail	A
mmu-miR-194-2-3p-0-1-T	1.59	-1	1.8	-0.55	0.5801		non-significant	mmu-miR-194-2-3p	NT tail	U
mmu-miR-192-5p-0-0--	6187.32	0.47	0.24	1.96	0.05	0.2262	non-significant	mmu-miR-192-5p	canonical	other
mmu-miR-192-5p-0-1-T	906.97	0.26	0.23	1.12	0.2626	0.5507	non-significant	mmu-miR-192-5p	NT tail	U
mmu-miR-192-5p-0-1-A	305.41	0.37	0.27	1.38	0.1688	0.4324	non-significant	mmu-miR-192-5p	ambiguous tail	A
mmu-miR-192-5p-0-2-AT	85.6	0.07	0.3	0.24	0.807	0.9222	non-significant	mmu-miR-192-5p	NT tail	AU
mmu-miR-192-5p-1-0--	124.81	0.43	0.4	1.09	0.2775	0.563	non-significant	mmu-miR-192-5p	trimmed	other
mmu-miR-192-5p-0-3-AGT	67.24	0.32	0.35	0.93	0.3517	0.6323	non-significant	mmu-miR-192-5p	ambiguous tail	other
mmu-miR-192-5p-0-3-ATT	30.96	0.13	0.59	0.22	0.8291	0.9333	non-significant	mmu-miR-192-5p	NT tail	AUU
mmu-miR-192-3p-0-1-T	2.05	0.53	1.87	0.29	0.7755		non-significant	mmu-miR-192-3p	NT tail	U
mmu-miR-6989-3p-0-1-T	21.27	-0.2	0.6	-0.33	0.7403	0.8989	non-significant	mmu-miR-6989-3p	NT tail	U
mmu-miR-6989-3p-0-0--	12.18	-0.74	0.83	-0.89	0.3732		non-significant	mmu-miR-6989-3p	canonical	other
mmu-miR-204-3p-0-0--	16	0.01	0.96	0.01	0.9949		non-significant	mmu-miR-204-3p	canonical	other
mmu-miR-204-3p-1-0--	2.16	-0.58	1.53	-0.38	0.7049		non-significant	mmu-miR-204-3p	trimmed	other
mmu-miR-3084-3p-1-2-0-1-A	45.95	-0.72	0.55	-1.31	0.1905	0.4595	non-significant	mmu-miR-3084-3p-1-2	NT tail	A
mmu-miR-3084-3p-1-2-0-0--	25.07	-0.69	0.75	-0.92	0.358	0.6401	non-significant	mmu-miR-3084-3p-1-2	canonical	other
mmu-miR-3084-3p-1-2-1-0--	23.48	-0.22	0.55	-0.4	0.6928	0.8812	non-significant	mmu-miR-3084-3p-1-2	trimmed	other
mmu-miR-3084-3p-1-2-2-0--	12.88	0.52	0.89	0.59	0.5564		non-significant	mmu-miR-3084-3p-1-2	trimmed	other
mmu-miR-3084-3p-1-2-0-1-T	2.24	-1.32	1.58	-0.83	0.4038		non-significant	mmu-miR-3084-3p-1-2	NT tail	U
mmu-miR-3084-3p-1-2-0-2-AA	2.79	-0.34	1.48	-0.23	0.8204		non-significant	mmu-miR-3084-3p-1-2	NT tail	AA
mmu-miR-3084-5p-1-2-0-0--	3.52	-1.13	1.51	-0.75	0.4549		non-significant	mmu-miR-3084-5p-1-2	canonical	other
mmu-miR-101b-3p-3-3-ACT	2076.48	0.53	0.24	2.2	0.0281	0.1572	non-significant	mmu-miR-101b-3p	ambiguous tail	other
mmu-miR-101b-3p-3-5-ACTGA	271.04	0.36	0.43	0.83	0.4049	0.6887	non-significant	mmu-miR-101b-3p	ambiguous tail	other
mmu-miR-101b-3p-0-0--	182.9	1.12	0.37	3.02	0.0025	0.0338	significant	mmu-miR-101b-3p	canonical	other
mmu-miR-101b-3p-0-3-GAA	96.18	0.78	0.55	1.41	0.1584	0.4151	non-significant	mmu-miR-101b-3p	ambiguous tail	other
mmu-miR-101b-3p-3-4-ACTG	79.58	0.84	0.58	1.45	0.1461	0.3952	non-significant	mmu-miR-101b-3p	ambiguous tail	other
mmu-miR-101b-3p-0-2-GA	80.71	0.9	0.57	1.57	0.1163	0.3559	non-significant	mmu-miR-101b-3p	ambiguous tail	other
mmu-miR-101b-3p-0-1-G	91.42	1.66	0.51	3.26	0.0011	0.0205	significant	mmu-miR-101b-3p	ambiguous tail	G
mmu-miR-101b-3p-3-2-AC	89.33	1.47	0.59	2.48	0.013	0.0985	non-significant	mmu-miR-101b-3p	ambiguous tail	other
mmu-miR-101b-3p-0-3-GAT	24.61	1.05	0.71	1.49	0.1364	0.3861	non-significant	mmu-miR-101b-3p	NT tail	other
mmu-miR-101b-3p-1-0--	27.07	1.77	0.9	1.96	0.0495	0.2258	non-significant	mmu-miR-101b-3p	trimmed	other
mmu-miR-101b-3p-3-5-ACTGG	10.15	1.09	1.13	0.97	0.3339		non-significant	mmu-miR-101b-3p	ambiguous tail	other
mmu-miR-3085-3p-0-1-T	111.9	-1.08	0.4	-2.7	0.0069	0.0657	non-significant	mmu-miR-3085-3p	NT tail	U
mmu-miR-3085-3p-1-0--	32.03	-1.56	0.99	-1.57	0.1161	0.3559	non-significant	mmu-miR-3085-3p	trimmed	other
mmu-miR-3085-3p-0-2-CT	12.94	-2.05	1	-2.05	0.0406		non-significant	mmu-miR-3085-3p	NT tail	other
mmu-miR-3085-3p-0-0--	9.17	-1.71	1.22	-1.4	0.1618		non-significant	mmu-miR-3085-3p	canonical	other
mmu-miR-3085-3p-0-2-TT	6.59	-1.26	1.01	-1.25	0.2117		non-significant	mmu-miR-3085-3p	NT tail	UU
mmu-miR-3085-3p-0-3-TTT	2.82	0.94	1.4	0.67	0.5009		non-significant	mmu-miR-3085-3p	NT tail	UUU
mmu-miR-146b-3p-0-0--	6.43	-0.21	1.08	-0.2	0.8439		non-significant	mmu-miR-146b-3p	canonical	other
mmu-miR-3086-3p-0-0--	2.38	-2.14	1.72	-1.24	0.2139		non-significant	mmu-miR-3086-3p	canonical	other
mmu-miR-3086-5p-0-0--	9.89	0.19	0.75	0.25	0.7988		non-significant	mmu-miR-3086-5p	canonical	other
mmu-miR-3086-5p-0-3-AGG	7.91	0.91	1.12	0.82	0.4134		non-significant	mmu-miR-3086-5p	NT tail	other
mmu-miR-3086-5p-0-2-AA	4.78	-0.42	1.12	-0.38	0.7072		non-significant	mmu-miR-3086-5p	NT tail	AA
mmu-miR-3086-5p-0-2-AG	4.99	-1.86	1.42	-1.31	0.1916		non-significant	mmu-miR-3086-5p	NT tail	other
mmu-miR-669b-5p-1-0--	2.85	-1.29	1.84	-0.7	0.4854		non-significant	mmu-miR-669b-5p	trimmed	other
mmu-miR-467e-5p-0-0--	6.06	-0.18	1.23	-0.15	0.8839		non-significant	mmu-miR-467e-5p	canonical	other
mmu-miR-467d-5p-1-0--	3.98	-0.48	1.14	-0.42	0.6714		non-significant	mmu-miR-467d-5p	trimmed	other
mmu-miR-669c-5p-0-2-AT	10.68	-0.68	1	-0.68	0.4971		non-significant	mmu-miR-669c-5p	ambiguous tail	AU
mmu-miR-669c-5p-0-0--	14.39	0.27	0.65	0.41	0.6799		non-significant	mmu-miR-669c-5p	canonical	other
mmu-miR-669o-5p-0-0--	3.83	0.8	1.17	0.68	0.4943		non-significant	mmu-miR-669o-5p	canonical	other
mmu-miR-466g-1-2-CA	4.84	0.04	1.19	0.04	0.9717		non-significant	mmu-miR-466g	ambiguous tail	other
mmu-miR-466h-3p-0-3-ACA	1.08	-1.13	2.55	-0.44	0.6572		non-significant	mmu-miR-466h-3p	ambiguous tail	other
mmu-miR-511-3p-0-0--	3.08	-0.09	1.39	-0.07	0.9466		non-significant	mmu-miR-511-3p	canonical	other
mmu-miR-3087-3p-0-2-GT	8.75	0.5	0.98	0.51	0.6133		non-significant	mmu-miR-3087-3p	NT tail	other
mmu-miR-126a-5p-0-0--	3824.45	1.29	0.38	3.4	0.0007	0.0158	significant	mmu-miR-126a-5p	canonical	other
mmu-miR-126a-5p-0-1-A	174.27	0.5	0.34	1.47	0.1413	0.3897	non-significant	mmu-miR-126a-5p	NT tail	A
mmu-miR-126a-5p-0-1-T	146.39	0.87	0.42	2.07	0.0383	0.1936	non-significant	mmu-miR-126a-5p	NT tail	U
mmu-miR-126a-5p-1-0--	45.99	1.22	0.44	2.79	0.0052	0.0554	non-significant	mmu-miR-126a-5p	trimmed	other
mmu-miR-126a-5p-2-0--	39.65	0.98	0.44	2.22	0.0261	0.1524	non-significant	mmu-miR-126a-5p	trimmed	other
mmu-miR-126a-5p-0-1-C	5.93	0.25	1.59	0.16	0.8759		non-significant	mmu-miR-126a-5p	ambiguous tail	C
mmu-miR-126a-3p-1-0--	286.28	0.52	0.35	1.48	0.139	0.3878	non-significant	mmu-miR-126a-3p	trimmed	other
mmu-miR-126a-3p-2-0--	252.88	0.66	0.41	1.59	0.1126	0.3498	non-significant	mmu-miR-126a-3p	trimmed	other
mmu-miR-126a-3p-0-0--	188.38	0.59	0.36	1.61	0.1079	0.3419	non-significant	mmu-miR-126a-3p	canonical	other
mmu-miR-126a-3p-0-1-T	141	0.45	0.36	1.25	0.2117	0.4832	non-significant	mmu-miR-126a-3p	NT tail	U
mmu-miR-126a-3p-1-1-T	47.43	0.27	0.45	0.61	0.5389	0.7936	non-significant	mmu-miR-126a-3p	ambiguous tail	U
mmu-miR-126a-3p-3-0--	45.79	0.38	0.51	0.74	0.4575	0.7355	non-significant	mmu-miR-126a-3p	trimmed	other
mmu-miR-126a-3p-0-1-A	47.51	-0.19	0.38	-0.5	0.6138	0.8405	non-significant	mmu-miR-126a-3p	NT tail	A
mmu-miR-126a-3p-1-1-A	33.66	0.04	0.5	0.09	0.9315	0.9745	non-significant	mmu-miR-126a-3p	ambiguous tail	A
mmu-miR-126a-3p-2-1-A	12.56	-1.34	0.78	-1.72	0.0846		non-significant	mmu-miR-126a-3p	ambiguous tail	A
mmu-miR-126a-3p-1-1-C	10.41	0.56	0.86	0.64	0.5204		non-significant	mmu-miR-126a-3p	ambiguous tail	C
mmu-miR-126a-3p-2-2-AA	10.19	0.93	0.91	1.02	0.3076		non-significant	mmu-miR-126a-3p	ambiguous tail	AA
mmu-miR-126a-3p-1-2-AA	2.64	-3.11	2.13	-1.46	0.1444		non-significant	mmu-miR-126a-3p	ambiguous tail	AA
mmu-miR-126a-3p-1-2-CT	3.7	-0.81	1.18	-0.69	0.4932		non-significant	mmu-miR-126a-3p	ambiguous tail	other
mmu-miR-126a-3p-2-3-AAA	5.8	-0.27	1.43	-0.19	0.8478		non-significant	mmu-miR-126a-3p	ambiguous tail	AAA
mmu-miR-219a-2-3p-0-0--	1346.61	0.64	0.24	2.62	0.0089	0.079	non-significant	mmu-miR-219a-2-3p	canonical	other
mmu-miR-219a-2-3p-0-1-T	162.03	0.7	0.24	2.92	0.0036	0.0424	non-significant	mmu-miR-219a-2-3p	NT tail	U
mmu-miR-219a-2-3p-1-0--	146.61	1.19	0.31	3.82	0.0001	0.0052	significant	mmu-miR-219a-2-3p	trimmed	other
mmu-miR-219a-2-3p-3-0--	14.42	1.1	1.13	0.97	0.3331		non-significant	mmu-miR-219a-2-3p	trimmed	other
mmu-miR-219a-2-3p-2-0--	16.02	0.45	0.74	0.6	0.5452		non-significant	mmu-miR-219a-2-3p	trimmed	other
mmu-miR-219a-2-3p-1-1-C	15.67	0.24	0.74	0.33	0.7419		non-significant	mmu-miR-219a-2-3p	ambiguous tail	C
mmu-miR-219a-2-3p-0-1-C	8.94	0.29	0.95	0.3	0.7618		non-significant	mmu-miR-219a-2-3p	NT tail	C
mmu-miR-219a-2-3p-0-2-TT	9.87	0.91	0.87	1.04	0.2987		non-significant	mmu-miR-219a-2-3p	NT tail	UU
mmu-miR-199b-5p-0-0--	2.83	-0.27	1.57	-0.17	0.8649		non-significant	mmu-miR-199b-5p	canonical	other
mmu-miR-181a-2-3p-1-0--	313.12	-0.26	0.41	-0.64	0.52	0.7783	non-significant	mmu-miR-181a-2-3p	trimmed	other
mmu-miR-181a-2-3p-0-0--	280.15	-0.33	0.5	-0.65	0.5128	0.7712	non-significant	mmu-miR-181a-2-3p	canonical	other
mmu-miR-181a-2-3p-3-0--	195.98	-0.27	0.27	-0.97	0.3312	0.6146	non-significant	mmu-miR-181a-2-3p	trimmed	other
mmu-miR-181a-2-3p-2-1-A	161.28	-0.27	0.39	-0.7	0.4843	0.7477	non-significant	mmu-miR-181a-2-3p	ambiguous tail	A
mmu-miR-181a-2-3p-0-1-T	75.71	-0.65	0.57	-1.14	0.2526	0.5382	non-significant	mmu-miR-181a-2-3p	ambiguous tail	U
mmu-miR-181a-2-3p-1-1-T	71.44	-1.02	0.55	-1.83	0.0669	0.2633	non-significant	mmu-miR-181a-2-3p	ambiguous tail	U
mmu-miR-181a-2-3p-2-0--	66.91	0.9	0.38	2.35	0.0188	0.1268	non-significant	mmu-miR-181a-2-3p	trimmed	other
mmu-miR-181a-2-3p-0-2-TT	12.29	0.34	1	0.34	0.7356		non-significant	mmu-miR-181a-2-3p	ambiguous tail	UU
mmu-miR-181a-2-3p-2-2-AA	6.88	-0.11	0.96	-0.12	0.908		non-significant	mmu-miR-181a-2-3p	ambiguous tail	AA
mmu-miR-181a-2-3p-1-1-A	11.18	-0.56	0.89	-0.64	0.5253		non-significant	mmu-miR-181a-2-3p	ambiguous tail	A
mmu-miR-181a-2-3p-1-2-AA	5.04	-0.1	1.35	-0.08	0.9382		non-significant	mmu-miR-181a-2-3p	ambiguous tail	AA
mmu-miR-181a-2-3p-0-2-AA	3.17	-2.54	2.08	-1.22	0.2231		non-significant	mmu-miR-181a-2-3p	NT tail	AA
mmu-miR-181a-2-3p-2-1-T	5.75	-1.16	1.25	-0.93	0.354		non-significant	mmu-miR-181a-2-3p	ambiguous tail	U
mmu-miR-5129-3p-0-1-C	10.72	-0.43	0.98	-0.44	0.6607		non-significant	mmu-miR-5129-3p	NT tail	C
mmu-miR-5129-3p-0-2-CT	4	0.33	1.33	0.24	0.8067		non-significant	mmu-miR-5129-3p	NT tail	other
mmu-miR-7224-3p-0-1-T	236.4	-1	0.64	-1.57	0.1155	0.3552	non-significant	mmu-miR-7224-3p	NT tail	U
mmu-miR-7224-3p-1-2-TT	71.98	-0.85	0.62	-1.37	0.1708	0.434	non-significant	mmu-miR-7224-3p	ambiguous tail	UU
mmu-miR-7224-3p-0-0--	22.32	-1.31	0.83	-1.57	0.1153	0.3552	non-significant	mmu-miR-7224-3p	canonical	other
mmu-miR-7224-3p-1-1-T	17.87	-0.26	0.93	-0.27	0.7835	0.9082	non-significant	mmu-miR-7224-3p	ambiguous tail	U
mmu-miR-7224-3p-0-1-C	3.45	-0.31	1.49	-0.21	0.8356		non-significant	mmu-miR-7224-3p	NT tail	C
mmu-miR-7224-3p-1-3-TTT	0.85	-0.04	2.84	-0.01	0.9896		non-significant	mmu-miR-7224-3p	ambiguous tail	UUU
mmu-miR-7224-3p-0-1-A	1.98	-1.92	2.27	-0.85	0.3975		non-significant	mmu-miR-7224-3p	ambiguous tail	A
mmu-miR-7224-3p-1-0--	1.29	-2.31	2.15	-1.07	0.2835		non-significant	mmu-miR-7224-3p	trimmed	other
mmu-miR-10b-5p-1-0--	1632.94	0.01	0.4	0.04	0.9703	0.9863	non-significant	mmu-miR-10b-5p	trimmed	other
mmu-miR-10b-5p-0-1-T	36.5	-0.29	0.6	-0.49	0.6228	0.8456	non-significant	mmu-miR-10b-5p	ambiguous tail	U
mmu-miR-10b-5p-0-0--	43.59	0.43	0.49	0.87	0.3841	0.6655	non-significant	mmu-miR-10b-5p	canonical	other
mmu-miR-10b-5p-2-0--	28.49	-0.59	0.65	-0.9	0.3688	0.6509	non-significant	mmu-miR-10b-5p	trimmed	other
mmu-miR-10b-5p-0-1-A	16.24	0.02	0.77	0.02	0.9801		non-significant	mmu-miR-10b-5p	NT tail	A
mmu-miR-10b-5p-2-1-A	12.42	0.22	1.19	0.18	0.8552		non-significant	mmu-miR-10b-5p	ambiguous tail	A
mmu-miR-10b-5p-0-1-G	11.02	0.82	0.89	0.92	0.359		non-significant	mmu-miR-10b-5p	NT tail	G
mmu-miR-10b-5p-1-1-A	6.48	-2.85	1.25	-2.28	0.0224		non-significant	mmu-miR-10b-5p	ambiguous tail	A
mmu-miR-10b-5p-1-1-T	8.38	-0.08	1.01	-0.08	0.9383		non-significant	mmu-miR-10b-5p	ambiguous tail	U
mmu-miR-1955-5p-2-0--	13.45	-0.82	0.83	-0.99	0.3236		non-significant	mmu-miR-1955-5p	trimmed	other
mmu-miR-7000-3p-0-1-T	4.83	-1.49	1.49	-1	0.3187		non-significant	mmu-miR-7000-3p	NT tail	U
mmu-miR-7000-3p-1-0--	2.45	-2.2	1.71	-1.28	0.1988		non-significant	mmu-miR-7000-3p	trimmed	other
mmu-miR-129-5p-1-2-0-0--	1413.95	-0.13	0.33	-0.41	0.6816	0.8746	non-significant	mmu-miR-129-5p-1-2	canonical	other
mmu-miR-129-5p-1-2-0-1-T	86.27	-0.47	0.43	-1.1	0.2735	0.5611	non-significant	mmu-miR-129-5p-1-2	NT tail	U
mmu-miR-129-5p-1-2-1-1-T	91.26	0	0.39	-0.01	0.9946	0.9971	non-significant	mmu-miR-129-5p-1-2	ambiguous tail	U
mmu-miR-129-5p-1-2-1-0--	111.11	0.28	0.4	0.7	0.4808	0.7476	non-significant	mmu-miR-129-5p-1-2	trimmed	other
mmu-miR-129-5p-1-2-2-0--	63.37	0.27	0.47	0.57	0.5713	0.8158	non-significant	mmu-miR-129-5p-1-2	trimmed	other
mmu-miR-129-5p-1-2-0-1-A	15.02	-1.71	0.99	-1.73	0.0829		non-significant	mmu-miR-129-5p-1-2	NT tail	A
mmu-miR-129-5p-1-2-1-2-TT	7.02	0.46	0.9	0.51	0.6102		non-significant	mmu-miR-129-5p-1-2	ambiguous tail	UU
mmu-miR-129-5p-1-2-0-2-TT	6.9	-1.06	0.91	-1.16	0.2466		non-significant	mmu-miR-129-5p-1-2	NT tail	UU
mmu-miR-129-5p-1-2-2-1-T	9.73	0.25	0.76	0.33	0.7396		non-significant	mmu-miR-129-5p-1-2	ambiguous tail	U
mmu-miR-129-5p-1-2-0-3-TGT	8.17	0.1	0.86	0.11	0.9108		non-significant	mmu-miR-129-5p-1-2	NT tail	other
mmu-miR-129-5p-1-2-3-0--	8.77	0.87	0.89	0.98	0.3291		non-significant	mmu-miR-129-5p-1-2	trimmed	other
mmu-miR-129-5p-1-2-0-3-ATT	3.99	0.51	2.3	0.22	0.8258		non-significant	mmu-miR-129-5p-1-2	NT tail	AUU
mmu-miR-129-5p-1-2-0-1-C	5.51	0.61	1.04	0.58	0.5587		non-significant	mmu-miR-129-5p-1-2	NT tail	C
mmu-miR-670-3p-1-0--	26.15	0.3	0.71	0.42	0.6758	0.874	non-significant	mmu-miR-670-3p	trimmed	other
mmu-miR-670-3p-3-0--	6.47	1.66	1.01	1.65	0.0986		non-significant	mmu-miR-670-3p	trimmed	other
mmu-miR-670-3p-2-0--	4.7	0.37	1.11	0.33	0.74		non-significant	mmu-miR-670-3p	trimmed	other
mmu-miR-674-5p-1-0--	60.61	0.25	0.42	0.6	0.5479	0.8016	non-significant	mmu-miR-674-5p	trimmed	other
mmu-miR-674-5p-0-1-T	32.79	-0.66	0.48	-1.37	0.1705	0.4338	non-significant	mmu-miR-674-5p	NT tail	U
mmu-miR-674-5p-0-0--	19.27	0.32	0.74	0.43	0.6699	0.8724	non-significant	mmu-miR-674-5p	canonical	other
mmu-miR-674-5p-3-0--	13.24	2.12	0.71	3	0.0027		non-significant	mmu-miR-674-5p	trimmed	other
mmu-miR-674-5p-2-0--	6.98	-0.28	0.94	-0.3	0.7652		non-significant	mmu-miR-674-5p	trimmed	other
mmu-miR-674-5p-1-1-T	7.18	0.64	1.05	0.61	0.541		non-significant	mmu-miR-674-5p	ambiguous tail	U
mmu-miR-674-5p-1-2-TT	4.32	-0.54	1.48	-0.36	0.7166		non-significant	mmu-miR-674-5p	ambiguous tail	UU
mmu-miR-674-5p-0-2-TT	7.54	0.59	0.93	0.64	0.5241		non-significant	mmu-miR-674-5p	NT tail	UU
mmu-miR-674-5p-0-1-A	3.92	-0.81	1.21	-0.67	0.503		non-significant	mmu-miR-674-5p	ambiguous tail	A
mmu-miR-674-5p-3-1-T	0.95	0	2.64	0	0.9992		non-significant	mmu-miR-674-5p	ambiguous tail	U
mmu-miR-674-5p-2-1-G	8.8	2.04	1.08	1.89	0.0594		non-significant	mmu-miR-674-5p	ambiguous tail	G
mmu-miR-674-3p-2-0--	267.61	-0.02	0.35	-0.06	0.9505	0.9804	non-significant	mmu-miR-674-3p	trimmed	other
mmu-miR-674-3p-1-0--	94.36	-0.73	0.39	-1.87	0.0612	0.2545	non-significant	mmu-miR-674-3p	trimmed	other
mmu-miR-674-3p-0-0--	45.79	-0.51	0.68	-0.76	0.4487	0.7287	non-significant	mmu-miR-674-3p	canonical	other
mmu-miR-674-3p-2-1-T	10.49	-1.28	0.91	-1.41	0.1586		non-significant	mmu-miR-674-3p	ambiguous tail	U
mmu-miR-674-3p-3-1-A	4.75	-0.83	1.09	-0.76	0.4488		non-significant	mmu-miR-674-3p	ambiguous tail	A
mmu-miR-499-5p-0-0--	8.48	0.28	0.82	0.34	0.7312		non-significant	mmu-miR-499-5p	canonical	other
mmu-miR-7004-3p-0-0--	1.73	-0.27	1.72	-0.16	0.8752		non-significant	mmu-miR-7004-3p	canonical	other
mmu-miR-7004-3p-0-1-T	1.99	-2.79	1.95	-1.43	0.1524		non-significant	mmu-miR-7004-3p	NT tail	U
mmu-miR-296-3p-0-1-T	4.23	0.05	1.31	0.04	0.9719		non-significant	mmu-miR-296-3p	NT tail	U
mmu-miR-296-3p-0-0--	6.32	-0.51	0.99	-0.51	0.6068		non-significant	mmu-miR-296-3p	canonical	other
mmu-miR-296-3p-0-3-ATT	5.96	-2.09	1.41	-1.48	0.1384		non-significant	mmu-miR-296-3p	NT tail	AUU
mmu-miR-296-5p-0-0--	542.13	-1.39	0.37	-3.76	0.0002	0.006	significant	mmu-miR-296-5p	canonical	other
mmu-miR-296-5p-1-0--	122.25	-0.72	0.45	-1.61	0.107	0.3419	non-significant	mmu-miR-296-5p	trimmed	other
mmu-miR-296-5p-0-1-T	39.03	-1.3	0.49	-2.63	0.0085	0.0767	non-significant	mmu-miR-296-5p	NT tail	U
mmu-miR-296-5p-1-1-C	8.64	-1.94	1.44	-1.35	0.1784		non-significant	mmu-miR-296-5p	ambiguous tail	C
mmu-miR-296-5p-2-0--	20.71	-1.37	0.71	-1.93	0.0534	0.2357	non-significant	mmu-miR-296-5p	trimmed	other
mmu-miR-296-5p-0-1-A	10.66	-3	1.2	-2.5	0.0124		non-significant	mmu-miR-296-5p	NT tail	A
mmu-miR-296-5p-1-1-G	3.44	-1.38	1.5	-0.92	0.3593		non-significant	mmu-miR-296-5p	ambiguous tail	G
mmu-miR-296-5p-3-0--	4.12	-0.37	1.13	-0.33	0.7433		non-significant	mmu-miR-296-5p	trimmed	other
mmu-miR-298-3p-0-0--	2.68	-0.76	1.68	-0.45	0.6516		non-significant	mmu-miR-298-3p	canonical	other
[truncated: 1,455 more rows]

## Sheet: Normalized isomiR counts
miRNA tailing under Tent2 KO in mice hippocampus
Table 2. Normalized isomiR counts
isomiR_ID	WT	Tent2 KO	category	tailClass	KO3	KO4	KO5	KO2	WT2	WT1	KO1	WT3
mmu-let-7a-1-3p-7c-2-3p-0-0--	73.62	68.06	canonical	other	74.9	78.23	64.06	47.58	70.45	94.48	75.5	55.92
mmu-let-7a-1-3p-7c-2-3p-0-1-T	25.48	33.22	NT tail	U	32.72	29.54	29.74	45.08	26.9	27	29.04	22.53
mmu-let-7a-1-3p-7c-2-3p-1-0--	16.3	13.55	trimmed	other	10.18	27.94	3.43	8.76	8.97	29.07	17.42	10.85
mmu-let-7a-1-3p-7c-2-3p-1-1-T	150.68	157.29	ambiguous tail	U	128.71	202.77	96.1	186.57	122.97	209.74	172.3	119.35
mmu-let-7a-2-3p-0-1-C	2.65	4.54	ambiguous tail	C	5.09	3.99	5.72	5.01	1.28	4.15	2.9	2.5
mmu-let-7b-3p-1-0--	118.67	103.54	trimmed	other	137.43	134.11	104.1	71.37	108.88	111.1	70.66	136.04
mmu-let-7b-3p-1-1-A	32.27	9.46	ambiguous tail	A	16.72	13.57	9.15	0.1	24.34	29.07	7.74	43.4
mmu-let-7b-3p-1-1-G	8.82	9.44	ambiguous tail	G	5.09	7.98	4.58	15.03	8.97	8.31	14.52	9.18
mmu-let-7b-3p-1-1-T	1632.96	1382.38	ambiguous tail	U	1569.93	1605.38	1677.1	1260.89	1804.81	1141.09	798.6	1952.99
mmu-let-7b-3p-1-2-TT	110.66	70.98	ambiguous tail	UU	84.35	74.24	75.5	58.85	125.53	65.41	61.95	141.05
mmu-let-7b-3p-1-3-TTT	17.18	16.09	ambiguous tail	UUU	19.63	11.18	22.88	11.27	28.18	4.15	15.49	19.2
mmu-let-7b-3p-2-0--	14.9	12.9	trimmed	other	24	11.18	6.86	13.77	12.81	9.34	8.71	22.53
mmu-let-7b-3p-2-1-T	11.96	4.28	ambiguous tail	U	3.64	10.38	3.43	0.1	10.25	7.27	3.87	18.36
mmu-let-7b-3p-2-2-TT	60.28	49.32	ambiguous tail	UU	43.63	54.28	66.35	30.05	57.64	66.45	52.27	56.75
mmu-let-7c-1-3p-0-0--	9.33	14.12	canonical	other	16	17.56	0.1	26.29	12.81	9.34	10.65	5.84
mmu-let-7c-1-3p-0-1-T	6.99	8.57	ambiguous tail	U	9.45	3.19	6.86	17.53	6.4	6.23	5.81	8.35
mmu-let-7d-3p-0-0--	2426.36	2169.18	canonical	other	2254.92	2241.63	2529.38	2518.02	3030.65	1384.05	1301.95	2864.38
mmu-let-7d-3p-0-1-T	15.08	13.76	NT tail	U	15.27	19.16	8.01	13.77	17.93	7.27	12.58	20.03
mmu-let-7d-3p-1-0--	138.78	179.92	trimmed	other	167.97	182.01	251.68	216.62	157.55	119.4	81.31	139.38
mmu-let-7d-3p-1-1-A	70.93	49.4	ambiguous tail	A	37.81	54.28	61.78	56.35	62.76	45.69	36.78	104.33
mmu-let-7d-3p-1-1-C	62.57	64.04	ambiguous tail	C	60.35	67.86	57.2	107.68	96.07	33.23	27.1	58.42
mmu-let-7d-3p-1-2-CT	8.05	1.5	ambiguous tail	other	0.1	0.1	3.43	3.76	7.69	3.11	0.1	13.35
mmu-let-7d-3p-2-0--	28.35	39.45	trimmed	other	49.45	47.1	48.05	40.07	21.78	33.23	12.58	30.05
mmu-let-7d-5p-0-0--	5307.58	6133.7	canonical	other	4755.61	6290.61	5890.44	5928.8	4571.6	6405.25	7803.01	4945.9
mmu-let-7d-5p-0-1-A	124.25	70.12	NT tail	A	60.35	83.82	72.07	80.14	88.38	139.13	54.21	145.22
mmu-let-7d-5p-0-1-T	484.99	572.89	NT tail	U	484.29	601.92	624.62	510.87	427.83	534.72	642.75	492.42
mmu-let-7d-5p-1-0--	1719.66	2201.49	trimmed	other	1574.3	2169.78	2271.98	1789.28	1161.79	2260.37	3202.13	1736.82
mmu-let-7d-5p-1-1-A	34.16	5.51	ambiguous tail	A	0.1	17.56	0.1	0.1	25.62	30.11	9.68	46.74
mmu-let-7d-5p-2-0--	145.04	211.62	trimmed	other	145.43	199.58	232.23	165.28	60.2	222.2	315.57	152.73
mmu-let-7d-5p-7-7-TATGGTT	72.61	105.23	ambiguous tail	other	150.52	170.04	126.98	35.06	28.18	47.76	43.56	141.88
mmu-let-7e-3p-0-0--	48.2	46.39	canonical	other	44.36	67.06	51.48	31.3	55.08	39.46	37.75	50.08
mmu-let-7e-3p-0-1-A	2.18	1.35	NT tail	A	1.45	0.8	2.29	1.25	3.84	1.04	0.97	1.67
mmu-let-7e-3p-0-1-T	43.55	52.86	NT tail	U	49.45	43.11	48.05	101.42	35.87	32.19	22.26	62.6
mmu-let-7e-3p-1-0--	6.47	8.4	trimmed	other	8.73	18.36	3.43	3.76	2.56	9.34	7.74	7.51
mmu-let-7e-3p-1-1-T	4.35	7.15	ambiguous tail	U	8	4.79	6.86	11.27	6.4	4.15	4.84	2.5
mmu-let-7f-1-3p-1-1-T	79.03	68.94	ambiguous tail	U	95.98	81.43	46.9	61.35	80.7	65.41	59.05	90.97
mmu-let-7f-2-3p-0-1-T	69.33	54.89	NT tail	U	63.26	57.48	60.63	26.29	78.14	70.6	66.79	59.26
mmu-let-7f-5p-1-2-0-0--	44248.5	47404.1	canonical	other	35310.8	39340.2	30051.7	42691.2	19435.4	85502.7	89626.7	27807.5
mmu-let-7f-5p-1-2-0-1-A	1411.11	1079.16	NT tail	A	852.96	879.73	671.53	1315.98	810.82	2487.76	1675.6	934.76
mmu-let-7f-5p-1-2-0-1-C	50.01	36	NT tail	C	33.45	33.53	13.73	45.08	29.46	91.37	54.21	29.21
mmu-let-7f-5p-1-2-0-1-G	79.47	72.13	NT tail	G	40.72	73.44	75.5	53.84	26.9	142.25	117.13	69.27
mmu-let-7f-5p-1-2-0-1-T	7196.14	7996.78	NT tail	U	5050.84	5734.19	4696.11	10749.5	3480.25	13820.8	13753.3	4287.39
mmu-let-7f-5p-1-2-0-2-AT	25.82	13.37	NT tail	AU	28.36	11.18	0.1	0.1	12.81	52.95	27.1	11.68
mmu-let-7f-5p-1-2-0-2-TT	30.5	42.47	NT tail	UU	28.36	30.34	35.46	60.1	16.65	58.14	58.08	16.69
mmu-let-7f-5p-1-2-1-0--	17274.9	18738.8	trimmed	other	12270.1	14478	10873.7	17703.8	6845.23	34953.2	38368.4	10026.2
mmu-let-7f-5p-1-2-1-1-A	143.62	92.91	ambiguous tail	A	71.99	80.63	58.34	85.14	60.2	242.96	168.43	127.7
mmu-let-7f-5p-1-2-1-1-C	48.66	41.87	ambiguous tail	C	26.18	23.95	30.89	45.08	12.81	117.33	83.25	15.86
mmu-let-7f-5p-1-2-2-0--	1342.32	1402.67	trimmed	other	901.68	1051.36	779.06	1432.43	508.52	2806.51	2848.81	711.92
mmu-let-7f-5p-1-2-3-0--	163.08	177.35	trimmed	other	96.71	95	100.67	209.1	75.57	321.87	385.26	91.81
mmu-let-7g-3p-0-0--	1.05	2.26	canonical	other	3.64	1.6	0.1	5.01	1.28	1.04	0.97	0.83
mmu-let-7i-3p-0-0--	14.35	21.95	canonical	other	33.45	31.13	25.17	11.27	15.37	17.65	8.71	10.02
mmu-let-7i-3p-1-0--	41.31	41.87	trimmed	other	37.81	48.7	54.91	47.58	52.52	32.19	20.33	39.23
mmu-let-7i-3p-2-0--	8.77	16.64	trimmed	other	31.27	22.35	11.44	7.51	3.84	12.46	10.65	10.02
mmu-miR-101a-5p-0-0--	7.39	12.01	canonical	other	10.18	15.97	6.86	12.52	5.12	10.38	14.52	6.68
mmu-miR-101b-3p-0-0--	164.22	194.1	canonical	other	137.43	186.8	131.56	207.85	117.84	289.68	306.85	85.13
mmu-miR-101b-3p-0-1-G	82.59	96.71	ambiguous tail	G	58.9	86.22	58.34	103.93	23.06	175.47	176.18	49.24
mmu-miR-101b-3p-0-2-GA	71.04	86.52	ambiguous tail	other	65.44	102.98	70.93	53.84	32.02	131.86	139.39	49.24
mmu-miR-101b-3p-0-3-GAA	102.83	92.18	ambiguous tail	other	81.44	94.2	82.37	53.84	46.11	197.28	149.07	65.1
mmu-miR-101b-3p-0-3-GAT	19.68	27.57	NT tail	other	14.54	19.16	37.75	23.79	6.4	34.26	42.59	18.36
mmu-miR-101b-3p-1-0--	30.06	25.27	trimmed	other	7.27	21.55	12.58	7.51	7.69	71.64	77.44	10.85
mmu-miR-101b-3p-3-2-AC	90.57	88.59	ambiguous tail	other	54.54	67.86	53.77	53.84	51.24	192.08	212.96	28.38
mmu-miR-101b-3p-3-3-ACT	1945.44	2155.1	ambiguous tail	other	1777.9	2387.72	1817.81	2258.83	1716.43	2741.1	2533.24	1378.78
mmu-miR-101b-3p-3-4-ACTG	73.52	83.22	ambiguous tail	other	72.72	101.38	58.34	50.08	38.43	137.06	133.58	45.07
mmu-miR-101b-3p-3-5-ACTGA	255.91	280.13	ambiguous tail	other	210.15	332.89	310.02	177.8	178.05	389.36	369.77	200.31
mmu-miR-101b-3p-3-5-ACTGG	14.68	7.45	ambiguous tail	other	5.82	9.58	0.1	6.26	6.4	30.11	15.49	7.51
mmu-miR-106b-3p-0-0--	43.7	43.36	canonical	other	37.09	63.07	38.9	31.3	38.43	38.42	46.46	54.25
mmu-miR-106b-3p-0-1-T	14.67	21.48	NT tail	U	18.91	13.57	35.46	28.8	11.53	12.46	10.65	20.03
mmu-miR-106b-3p-0-2-AG	3.91	0.1	NT tail	other	0.1	0.1	0.1	0.1	3.84	6.23	0.1	1.67
mmu-miR-106b-3p-0-2-TT	1.48	3.2	NT tail	UU	0.1	3.99	3.43	7.51	2.56	1.04	0.97	0.83
mmu-miR-106b-3p-1-0--	23.62	31.71	trimmed	other	32.72	26.34	28.6	35.06	29.46	23.88	35.82	17.53
mmu-miR-106b-3p-1-1-A	1.74	0.37	ambiguous tail	A	0.73	0.8	0.1	0.1	1.28	3.11	0.1	0.83
mmu-miR-106b-3p-1-1-T	8.4	11.72	ambiguous tail	U	15.27	14.37	8.01	11.27	8.97	6.23	9.68	10.02
mmu-miR-106b-3p-2-0--	66.39	83.25	trimmed	other	86.53	83.82	99.53	56.35	64.05	63.34	90.02	71.78
mmu-miR-106b-3p-3-0--	21.38	24.95	trimmed	other	27.63	15.17	17.16	33.81	17.93	22.84	30.98	23.37
mmu-miR-106b-5p-0-0--	37.65	69.62	canonical	other	57.45	63.07	88.09	60.1	37.15	33.23	79.38	42.57
mmu-miR-106b-5p-0-1-A	35.09	25.47	NT tail	A	37.09	30.34	12.58	12.52	39.71	36.34	34.85	29.21
mmu-miR-106b-5p-0-1-T	15.3	18.74	NT tail	U	28.36	15.17	18.3	12.52	21.78	16.61	19.36	7.51
mmu-miR-106b-5p-1-0--	26.88	45.09	trimmed	other	48.72	34.33	41.18	45.08	28.18	24.92	56.14	27.54
mmu-miR-106b-5p-1-1-A	2.38	0.54	ambiguous tail	A	1.45	0.1	0.1	0.1	2.56	2.08	0.97	2.5
mmu-miR-106b-5p-1-2-AC	2.52	0.1	ambiguous tail	other	0.1	0.1	0.1	0.1	2.56	4.15	0.1	0.83
mmu-miR-106b-5p-2-1-T	2.18	2.46	ambiguous tail	U	3.64	1.6	1.14	0.1	3.84	1.04	5.81	1.67
mmu-miR-10a-5p-0-0--	24.63	30.52	canonical	other	18.91	55.88	19.45	22.54	17.93	34.26	35.82	21.7
mmu-miR-10a-5p-0-1-A	22.59	17.92	NT tail	A	11.63	27.14	18.3	2.5	12.81	24.92	30.01	30.05
mmu-miR-10a-5p-0-1-G	13	8.34	NT tail	G	5.82	9.58	4.58	6.26	12.81	22.84	15.49	3.34
mmu-miR-10a-5p-0-1-T	33.58	40.59	ambiguous tail	U	30.54	55.88	37.75	18.78	42.27	34.26	60.02	24.2
mmu-miR-10a-5p-1-0--	672.8	689.89	trimmed	other	536.64	1029.81	473.61	272.96	641.74	789.11	1136.43	587.57
mmu-miR-10a-5p-2-0--	13.57	13.67	trimmed	other	16.72	21.55	21.74	2.5	5.12	19.73	5.81	15.86
mmu-miR-10b-5p-0-0--	37.73	47.11	canonical	other	37.09	58.28	22.88	56.35	30.74	37.38	60.98	45.07
mmu-miR-10b-5p-0-1-A	19.61	14.22	NT tail	A	21.09	10.38	4.58	13.77	11.53	15.57	21.3	31.72
mmu-miR-10b-5p-0-1-G	15.96	8.06	NT tail	G	8	7.98	1.14	12.52	10.25	25.96	10.65	11.68
mmu-miR-10b-5p-0-1-T	39.36	34.78	ambiguous tail	U	44.36	39.92	13.73	18.78	33.3	32.19	57.11	52.58
mmu-miR-10b-5p-1-0--	1725.4	1577.47	trimmed	other	1435.41	1964.62	676.1	1114.39	1589.62	1605.21	2696.84	1981.36
mmu-miR-10b-5p-1-1-A	11.47	3.5	ambiguous tail	A	7.27	3.99	2.29	0.1	8.97	2.08	3.87	23.37
mmu-miR-10b-5p-1-1-T	10.22	7.28	ambiguous tail	U	5.82	8.78	1.14	10.02	8.97	4.15	10.65	17.53
mmu-miR-10b-5p-2-0--	27.03	29.36	trimmed	other	30.54	50.29	12.58	26.29	26.9	12.46	27.1	41.73
mmu-miR-10b-5p-2-1-A	12.03	12.67	ambiguous tail	A	17.45	14.37	0.1	6.26	11.53	14.54	25.17	10.02
mmu-miR-10b-5p-3-0--	6.79	6.2	trimmed	other	0.1	15.17	1.14	8.76	6.4	3.11	5.81	10.85
mmu-miR-1188-3p-2-0--	8.33	2.81	trimmed	other	2.18	3.99	3.43	2.5	16.65	4.15	1.94	4.17
mmu-miR-1188-5p-0-0--	3.49	2.96	canonical	other	5.82	3.99	1.14	3.76	2.56	2.08	0.1	5.84
mmu-miR-1188-5p-0-1-T	3.59	1.65	ambiguous tail	U	4.36	0.8	0.1	0.1	6.4	1.04	2.9	3.34
mmu-miR-1188-5p-0-2-TT	4.58	2.49	NT tail	UU	3.64	1.6	1.14	1.25	7.69	1.04	4.84	5.01
mmu-miR-1191a-1-0--	5.5	8.13	trimmed	other	8	3.99	3.43	8.76	2.56	11.42	16.46	2.5
mmu-miR-1191b-5p-0-0--	13.13	17.65	canonical	other	10.91	19.96	20.59	21.29	8.97	10.38	15.49	20.03
mmu-miR-1191b-5p-0-3-GCT	1.48	0.74	NT tail	other	1.45	0.1	0.1	0.1	2.56	1.04	1.94	0.83
mmu-miR-1193-3p-0-0--	7.69	8.44	canonical	other	10.18	13.57	4.58	10.02	6.4	4.15	3.87	12.52
mmu-miR-1193-3p-0-1-C	4.07	3.42	ambiguous tail	C	2.91	3.19	8.01	0.1	5.12	2.08	2.9	5.01
mmu-miR-1193-3p-0-1-T	4.76	2.31	NT tail	U	2.18	0.1	0.1	6.26	5.12	4.15	2.9	5.01
mmu-miR-1193-3p-1-0--	3.81	2.91	trimmed	other	2.18	0.1	2.29	1.25	7.69	2.08	8.71	1.67
mmu-miR-1197-3p-0-0--	29.79	26.38	canonical	other	29.81	25.55	26.31	25.04	34.58	19.73	25.17	35.05
mmu-miR-1198-3p-0-0--	7.87	4.92	canonical	other	1.45	5.59	6.86	8.76	11.53	6.23	1.94	5.84
mmu-miR-1198-5p-0-0--	154.38	196.09	canonical	other	172.34	158.86	249.39	217.87	149.87	154.71	181.98	158.58
mmu-miR-1198-5p-0-1-A	19.49	17.11	NT tail	A	19.63	19.96	13.73	22.54	6.4	18.69	9.68	33.38
mmu-miR-1198-5p-0-1-T	22.9	29.59	ambiguous tail	U	29.81	27.94	33.18	33.81	32.02	12.46	23.23	24.2
mmu-miR-1198-5p-0-2-AA	7.62	5.46	NT tail	AA	4.36	6.39	1.14	12.52	6.4	7.27	2.9	9.18
mmu-miR-1198-5p-0-2-AT	6.53	4.5	NT tail	AU	8.73	5.59	8.01	0.1	1.28	12.46	0.1	5.84
mmu-miR-1198-5p-0-2-TA	25.59	8.83	ambiguous tail	UA	8.73	9.58	14.87	10.02	40.99	20.77	0.97	15.02
mmu-miR-1198-5p-0-2-TT	13.67	35.51	NT tail	UU	21.09	27.14	52.62	56.35	7.69	12.46	20.33	20.87
mmu-miR-1198-5p-1-0--	14.1	19.57	trimmed	other	20.36	19.96	24.02	11.27	10.25	18.69	22.26	13.35
mmu-miR-1198-5p-1-1-A	13.01	0.74	ambiguous tail	A	1.45	0.1	0.1	0.1	3.84	13.5	1.94	21.7
mmu-miR-1198-5p-1-1-T	30.26	45.02	ambiguous tail	U	38.54	41.51	56.06	55.09	25.62	30.11	33.88	35.05
mmu-miR-1198-5p-1-2-AA	5.66	0.1	ambiguous tail	AA	0.1	0.1	0.1	0.1	5.12	5.19	0.1	6.68
mmu-miR-1198-5p-1-2-TT	9.68	14.91	ambiguous tail	UU	5.82	15.17	22.88	20.03	11.53	4.15	10.65	13.35
mmu-miR-1198-5p-1-3-AAT	2.3	0.1	ambiguous tail	AAU	0.1	0.1	0.1	0.1	1.28	3.11	0.1	2.5
mmu-miR-1198-5p-1-3-AGA	3.96	0.1	ambiguous tail	other	0.1	0.1	0.1	0.1	8.97	2.08	0.1	0.83
mmu-miR-1198-5p-2-0--	7.01	20.35	trimmed	other	18.18	30.34	18.3	17.53	8.97	6.23	17.42	5.84
mmu-miR-1198-5p-3-0--	9.8	10.01	trimmed	other	6.54	10.38	13.73	8.76	10.25	8.31	10.65	10.85
mmu-miR-1199-5p-0-2-GC	4.19	5.74	NT tail	other	2.91	0.8	5.72	12.52	3.84	6.23	6.78	2.5
mmu-miR-12185-3p-1-0--	9.55	10.83	trimmed	other	18.91	3.99	19.45	5.01	5.12	9.34	6.78	14.19
mmu-miR-12189-3p-0-0--	2.38	3.92	canonical	other	0.1	7.98	4.58	5.01	2.56	2.08	1.94	2.5
mmu-miR-12194-3p-0-0--	6.55	5.83	canonical	other	4.36	3.19	2.29	12.52	3.84	8.31	6.78	7.51
mmu-miR-12194-3p-0-1-T	31.99	24.42	NT tail	U	28.36	25.55	24.02	32.56	33.3	30.11	11.62	32.55
mmu-miR-122-5p-1-0--	8.22	6.56	trimmed	other	5.82	3.19	1.14	18.78	11.53	3.11	3.87	10.02
mmu-miR-12200-5p-0-0--	3.15	2.61	canonical	other	2.91	2.39	4.58	1.25	3.84	3.11	1.94	2.5
mmu-miR-1224-3p-0-0--	7.86	14.88	canonical	other	7.27	2.39	29.74	26.29	10.25	4.15	8.71	9.18
mmu-miR-1224-3p-0-1-A	10.94	2.02	NT tail	A	6.54	2.39	0.1	0.1	21.78	5.19	0.97	5.84
mmu-miR-1224-3p-0-1-T	88.86	91.57	NT tail	U	111.98	93.4	117.83	81.39	134.5	39.46	53.24	92.64
mmu-miR-1224-3p-0-2-TA	9.07	1.04	NT tail	UA	3.64	0.1	0.1	1.25	12.81	1.04	0.1	13.35
mmu-miR-1224-5p-0-0--	51.29	95.98	canonical	other	87.99	114.16	183.04	67.61	37.15	24.92	27.1	91.81
mmu-miR-1224-5p-0-1-A	33.31	14.13	NT tail	A	19.63	8.78	25.17	11.27	30.74	16.61	5.81	52.58
mmu-miR-1224-5p-0-1-G	80.08	112.6	ambiguous tail	G	103.26	126.13	205.92	76.38	75.57	35.3	51.3	129.36
mmu-miR-1224-5p-0-1-T	17.43	38.28	NT tail	U	39.27	41.51	69.78	26.29	15.37	5.19	14.52	31.72
mmu-miR-1224-5p-0-2-GG	24.91	41.71	ambiguous tail	other	45.08	47.1	61.78	40.07	20.49	4.15	14.52	50.08
mmu-miR-1224-5p-0-3-GGA	2.72	0.68	NT tail	other	0.73	2.39	0.1	0.1	1.28	1.04	0.1	5.84
mmu-miR-1224-5p-0-3-GGT	11.82	30.58	ambiguous tail	other	30.54	30.34	65.21	20.03	10.25	5.19	6.78	20.03
mmu-miR-1224-5p-1-0--	31.62	78.03	trimmed	other	76.35	63.86	139.57	72.62	37.15	17.65	37.75	40.06
mmu-miR-1224-5p-1-1-A	10.2	5.57	ambiguous tail	A	8	3.19	4.58	6.26	7.69	6.23	5.81	16.69
mmu-miR-1224-5p-1-1-T	9.18	14.77	ambiguous tail	U	17.45	15.17	22.88	12.52	10.25	7.27	5.81	10.02
mmu-miR-1224-5p-1-2-AA	5.61	2.97	ambiguous tail	AA	1.45	5.59	1.14	3.76	6.4	2.08	2.9	8.35
mmu-miR-1224-5p-1-2-AT	5.34	2.98	ambiguous tail	AU	0.73	2.39	9.15	2.5	7.69	4.15	0.1	4.17
mmu-miR-1224-5p-2-0--	24.98	57.01	trimmed	other	64.72	47.9	74.36	52.59	23.06	13.5	45.5	38.39
mmu-miR-1224-5p-3-0--	2.38	5.97	trimmed	other	2.91	3.99	11.44	3.76	2.56	2.08	7.74	2.5
mmu-miR-1231-3p-1-0--	3.72	3.48	trimmed	other	5.09	2.39	2.29	3.76	5.12	5.19	3.87	0.83
mmu-miR-124-3p-1-2-3-0-0--	11947.5	11436.4	canonical	other	11438.9	11924.2	9403.66	10371.3	14209.2	10994.5	14043.7	10638.8
mmu-miR-124-3p-1-2-3-0-1-A	1556.34	1492.22	NT tail	A	1771.36	1836.89	1345.34	1025.49	2031.54	1285.41	1482	1352.07
mmu-miR-124-3p-1-2-3-0-1-G	40.31	40.41	NT tail	G	28.36	37.52	22.88	51.34	46.11	62.3	61.95	12.52
mmu-miR-124-3p-1-2-3-0-1-T	748.45	930.08	NT tail	U	990.39	1111.23	597.17	729.99	769.83	671.78	1221.61	803.73
mmu-miR-124-3p-1-2-3-0-2-AA	235.3	245.8	NT tail	AA	250.87	256.25	251.68	280.48	312.54	167.17	189.73	226.18
mmu-miR-124-3p-1-2-3-0-2-AT	256.91	271.71	NT tail	AU	335.22	314.53	257.4	231.64	315.11	191.05	219.74	264.57
mmu-miR-124-3p-1-2-3-0-3-AAA	93.97	40.89	NT tail	AAA	55.26	51.89	46.9	30.05	124.25	63.34	20.33	94.31
mmu-miR-124-3p-1-2-3-0-3-AAT	245.47	219.81	NT tail	AAU	247.23	242.68	215.07	196.58	352.25	167.17	197.47	217
mmu-miR-124-3p-1-2-3-0-3-ATT	68	83.26	NT tail	AUU	93.08	126.93	60.63	68.87	96.07	31.15	66.79	76.78
mmu-miR-124-3p-1-2-3-1-0--	5400.53	4690.07	trimmed	other	4216.79	4310.02	4197.33	4512.65	7038.65	5325.42	6213.56	3837.54
mmu-miR-124-3p-1-2-3-1-1-A	48.14	17.18	ambiguous tail	A	17.45	29.54	0.1	0.1	51.24	58.14	38.72	35.05
mmu-miR-124-3p-1-2-3-1-1-T	30.54	44.24	ambiguous tail	U	34.9	47.9	43.47	30.05	34.58	31.15	64.86	25.87
mmu-miR-124-3p-1-2-3-2-0--	398.13	351.32	trimmed	other	309.77	280.2	264.26	329.31	400.93	530.57	573.05	262.9
mmu-miR-124-3p-1-2-3-2-1-A	75.69	10.42	ambiguous tail	A	21.81	8.78	0.1	0.1	53.8	109.02	21.3	64.26
mmu-miR-124-3p-1-2-3-2-1-T	42.24	23.64	ambiguous tail	U	24.72	19.16	12.58	28.8	23.06	51.91	32.91	51.75
mmu-miR-124-3p-1-2-3-2-2-AA	26.53	0.1	ambiguous tail	AA	0.1	0.1	0.1	0.1	14.09	44.65	0.1	20.87
mmu-miR-124-3p-1-2-3-3-0--	70.9	35.55	trimmed	other	24	27.14	19.45	20.03	51.24	138.09	87.12	23.37
mmu-miR-124-5p-1-2-3-0-0--	61.13	70.57	canonical	other	60.35	78.23	65.21	63.86	52.52	75.8	85.18	55.08
mmu-miR-124-5p-1-2-3-0-1-T	29.98	29.26	NT tail	U	32.72	24.75	26.31	23.79	25.62	34.26	38.72	30.05
mmu-miR-124-5p-1-2-3-1-0--	24.45	15.74	trimmed	other	11.63	23.15	12.58	10.02	23.06	39.46	21.3	10.85
mmu-miR-1247-3p-0-0--	4.82	7.1	canonical	other	3.64	5.59	10.3	15.03	3.84	3.11	0.97	7.51
mmu-miR-1247-5p-0-0--	36.9	28.17	canonical	other	32.72	21.55	42.33	41.32	61.48	4.15	2.9	45.07
mmu-miR-1247-5p-0-1-A	28.08	18.95	NT tail	A	26.9	23.15	21.74	20.03	35.87	4.15	2.9	44.23
mmu-miR-1247-5p-0-1-C	23.42	16.66	NT tail	C	26.18	16.76	21.74	13.77	35.87	9.34	4.84	25.04
mmu-miR-1247-5p-0-1-T	276.24	175.35	NT tail	U	229.78	191.59	169.31	266.7	394.52	43.61	19.36	390.6
mmu-miR-1247-5p-0-2-CT	12.55	12.45	NT tail	other	18.91	10.38	17.16	10.02	23.06	2.08	5.81	12.52
mmu-miR-1247-5p-0-2-TA	8.68	1.66	NT tail	UA	2.18	1.6	3.43	0.1	16.65	1.04	0.97	8.35
mmu-miR-1247-5p-0-2-TT	83.78	92.61	NT tail	UU	87.99	86.22	128.13	123.96	120.41	20.77	36.78	110.17
mmu-miR-1247-5p-1-0--	66.78	123.87	trimmed	other	118.53	86.22	186.47	220.37	96.07	12.46	7.74	91.81
mmu-miR-1247-5p-2-0--	53.86	80.46	trimmed	other	101.8	65.46	126.98	96.41	71.73	15.57	11.62	74.28
mmu-miR-1249-3p-0-0--	3550.84	2814.06	canonical	other	2767.56	3154.88	4310.58	2585.63	4708.66	1790.02	1251.62	4153.85
mmu-miR-1249-3p-0-1-A	108.8	46.9	NT tail	A	42.18	51.09	72.07	48.83	126.81	64.37	20.33	135.21
mmu-miR-1249-3p-0-1-T	89.5	93.8	NT tail	U	103.26	88.61	121.26	115.2	117.84	44.65	40.66	106
mmu-miR-1249-3p-1-0--	538.05	627.98	trimmed	other	579.54	769.56	968.97	545.93	602.03	271	275.88	741.13
mmu-miR-1249-3p-1-1-T	83.74	72.99	ambiguous tail	U	74.17	99.79	99.53	57.6	110.16	42.57	33.88	98.48
mmu-miR-1249-3p-2-0--	382.53	454.4	trimmed	other	414.48	587.55	663.52	445.76	529.02	149.51	160.69	469.05
mmu-miR-1249-3p-3-0--	62.24	77.57	trimmed	other	61.81	109.37	108.68	87.65	67.89	22.84	20.33	95.98
mmu-miR-124b-3p-0-0--	2.33	1.31	canonical	other	3.64	0.8	0.1	0.1	5.12	1.04	1.94	0.83
mmu-miR-124b-3p-2-1-T	4.21	1.05	ambiguous tail	U	2.18	1.6	0.1	1.25	5.12	4.15	0.1	3.34
mmu-miR-1251-5p-0-0--	6.12	6.05	canonical	other	6.54	7.98	6.86	8.76	10.25	3.11	0.1	5.01
mmu-miR-1251-5p-1-0--	40.36	27.96	trimmed	other	28.36	27.14	18.3	47.58	79.42	16.61	18.39	25.04
mmu-miR-1258-5p-0-0--	4.35	3.73	canonical	other	5.09	0.1	4.58	5.01	6.4	4.15	3.87	2.5
mmu-miR-125a-3p-0-0--	48.87	65.86	canonical	other	38.54	47.1	51.48	130.22	60.2	40.49	61.95	45.9
mmu-miR-125a-3p-0-1-T	6.2	10.43	ambiguous tail	U	17.45	7.18	5.72	15.03	11.53	2.08	6.78	5.01
mmu-miR-125a-3p-1-0--	34.87	46.5	trimmed	other	26.18	61.47	40.04	65.11	29.46	38.42	39.69	36.72
mmu-miR-125a-3p-2-0--	7.52	14.14	trimmed	other	11.63	19.96	12.58	18.78	2.56	8.31	7.74	11.68
mmu-miR-125a-3p-3-1-T	1.95	0.47	ambiguous tail	U	0.1	0.1	0.1	0.1	1.28	2.08	1.94	2.5
mmu-miR-125b-1-3p-0-0--	1124.11	1076.04	canonical	other	1048.56	863.76	843.13	1388.6	1219.43	1087.1	1236.13	1065.8
mmu-miR-125b-1-3p-0-1-A	17.38	0.1	NT tail	A	0.1	0.1	0.1	0.1	19.21	10.38	0.1	22.53
mmu-miR-125b-1-3p-0-1-T	132.87	155.81	NT tail	U	148.34	123.74	129.27	214.11	115.28	138.09	163.59	145.22
mmu-miR-125b-1-3p-1-0--	349.25	297.28	trimmed	other	247.96	219.53	323.75	320.54	502.12	305.26	374.61	240.37
mmu-miR-125b-1-3p-1-1-G	32.34	17.6	ambiguous tail	G	14.54	9.58	9.15	15.03	29.46	55.03	39.69	12.52
mmu-miR-125b-1-3p-2-0--	164.49	205.79	trimmed	other	158.52	157.27	208.21	314.28	215.19	142.25	190.7	136.04
mmu-miR-125b-1-3p-2-1-A	56.62	63.56	ambiguous tail	A	29.09	52.69	54.91	132.73	49.96	58.14	48.4	61.76
mmu-miR-125b-1-3p-2-1-T	915.14	1078.94	ambiguous tail	U	806.42	823.85	1184.04	1538.86	1091.34	854.52	1041.56	799.56
mmu-miR-125b-1-3p-2-2-TA	9.71	8.37	ambiguous tail	UA	5.09	5.59	8.01	12.52	7.69	11.42	10.65	10.02
mmu-miR-125b-1-3p-2-2-TT	317.63	320.22	ambiguous tail	UU	219.6	204.36	402.69	375.64	295.89	404.94	398.81	252.05
mmu-miR-125b-1-3p-3-0--	46.03	44.97	trimmed	other	41.45	35.13	54.91	48.83	44.83	45.69	44.53	47.57
mmu-miR-125b-1-3p-3-1-A	80.44	73.98	ambiguous tail	A	71.26	57.48	46.9	105.18	99.91	57.11	89.06	84.3
mmu-miR-125b-2-3p-0-0--	639.77	712.88	canonical	other	666.08	824.64	780.21	704.95	826.19	483.85	588.54	609.27
mmu-miR-125b-2-3p-0-1-T	72.45	105.05	NT tail	U	116.35	95	134.99	88.9	81.98	51.91	90.02	83.46
mmu-miR-125b-2-3p-0-2-AT	33.77	0.1	NT tail	AU	0.1	0.1	0.1	0.1	62.76	13.5	0.1	25.04
mmu-miR-125b-2-3p-0-2-TT	125.02	160.87	NT tail	UU	163.61	178.82	184.18	127.72	172.92	94.48	150.04	107.66
mmu-miR-125b-2-3p-1-0--	6701.57	4791.46	trimmed	other	4485.11	4803.37	4627.47	4821.93	10804.5	4688.95	5219.43	4611.22
mmu-miR-125b-2-3p-1-1-G	23.16	22.35	ambiguous tail	G	14.54	22.35	10.3	41.32	17.93	41.53	23.23	10.02
mmu-miR-125b-2-3p-1-3-ATT	25.29	19.66	ambiguous tail	AUU	19.63	25.55	18.3	21.29	29.46	23.88	13.55	22.53
mmu-miR-125b-2-3p-2-0--	337.23	356.71	trimmed	other	278.5	344.87	353.5	313.03	229.28	491.11	493.68	291.28
mmu-miR-125b-2-3p-2-1-A	47	47.31	ambiguous tail	A	31.27	47.1	62.92	40.07	38.43	63.34	55.18	39.23
mmu-miR-125b-2-3p-2-1-T	3211.47	2543.24	ambiguous tail	U	2119.67	2323.05	2238.8	2436.63	3823.54	3511.52	3598.04	2299.35
mmu-miR-125b-2-3p-3-2-TT	24.73	15.03	ambiguous tail	UU	12.36	15.97	17.16	11.27	20.49	27	18.39	26.71
mmu-miR-1264-3p-0-0--	83.04	33.09	canonical	other	68.35	27.14	9.15	37.56	64.05	41.53	23.23	143.55
mmu-miR-1264-3p-1-0--	41.41	25.91	trimmed	other	50.17	17.56	22.88	13.77	35.87	24.92	25.17	63.43
mmu-miR-1264-3p-1-1-G	1.82	0.5	ambiguous tail	G	0.1	0.1	0.1	1.25	2.56	2.08	0.97	0.83
mmu-miR-1264-5p-0-0--	10.09	7.54	canonical	other	18.18	3.99	1.14	3.76	11.53	6.23	10.65	12.52
mmu-miR-1264-5p-1-0--	5.85	2.42	trimmed	other	5.09	4.79	1.14	0.1	3.84	10.38	0.97	3.34
mmu-miR-126a-3p-0-0--	178.42	194.36	canonical	other	197.79	190.79	102.96	184.06	137.06	242.96	296.21	155.24
mmu-miR-126a-3p-0-1-A	57.27	41.66	NT tail	A	37.81	51.09	42.33	32.56	62.76	62.3	44.53	46.74
mmu-miR-126a-3p-0-1-T	122.18	152.29	NT tail	U	174.52	162.85	98.38	164.03	76.86	157.82	161.66	131.87
mmu-miR-126a-3p-1-0--	286.1	286.39	trimmed	other	311.95	273.82	139.57	315.54	266.43	366.52	391.07	225.34
mmu-miR-126a-3p-1-1-A	44.77	27	ambiguous tail	A	32.72	27.14	17.16	25.04	35.87	55.03	32.91	43.4
mmu-miR-126a-3p-1-1-C	8.25	11.71	ambiguous tail	C	12.36	14.37	3.43	10.02	7.69	10.38	18.39	6.68
mmu-miR-126a-3p-1-1-T	42.25	50.54	ambiguous tail	U	58.17	43.11	33.18	68.87	49.96	38.42	49.37	38.39
mmu-miR-126a-3p-1-2-AA	4.52	1.57	ambiguous tail	AA	4.36	3.19	0.1	0.1	8.97	2.08	0.1	2.5
mmu-miR-126a-3p-1-2-CT	4.07	3.48	ambiguous tail	other	2.91	3.99	3.43	1.25	5.12	2.08	5.81	5.01
mmu-miR-126a-3p-2-0--	239.67	260.8	trimmed	other	252.32	273.02	110.97	237.9	162.68	334.33	429.79	222.01
mmu-miR-126a-3p-2-1-A	17.34	9.7	ambiguous tail	A	14.54	12.77	8.01	2.5	14.09	10.38	10.65	27.54
mmu-miR-126a-3p-2-2-AA	13.55	8.18	ambiguous tail	AA	5.09	7.18	5.72	11.27	2.56	19.73	11.62	18.36
mmu-miR-126a-3p-2-3-AAA	9.56	3.56	ambiguous tail	AAA	1.45	9.58	0.1	3.76	6.4	11.42	2.9	10.85
mmu-miR-126a-3p-3-0--	47.72	44.63	trimmed	other	50.17	47.1	20.59	50.08	58.92	55.03	55.18	29.21
mmu-miR-126a-5p-0-0--	4352.23	3507.77	canonical	other	2679.58	2719.01	1383.09	3412.04	2062.28	8398.78	7345.15	2595.64
mmu-miR-126a-5p-0-1-A	206.35	155.03	NT tail	A	149.79	151.68	110.97	156.52	129.37	309.41	206.18	180.28
mmu-miR-126a-5p-0-1-C	8.29	4.55	ambiguous tail	C	4.36	5.59	0.1	0.1	5.12	15.57	12.58	4.17
mmu-miR-126a-5p-0-1-T	152.12	142.95	NT tail	U	139.61	129.32	67.5	131.47	101.19	253.34	246.84	101.82
mmu-miR-126a-5p-1-0--	59.92	37.64	trimmed	other	24.72	23.15	17.16	35.06	38.43	112.14	88.09	29.21
mmu-miR-126a-5p-2-0--	51.93	32.28	trimmed	other	19.63	24.75	16.02	31.3	33.3	88.26	69.7	34.22
mmu-miR-127-3p-0-0--	489577	488146	canonical	other	553538	495879	548936	414518	497223	431562	427861	539945
mmu-miR-127-3p-0-1-A	9189.19	1346.26	NT tail	A	1738.63	1357.11	1513.51	1135.68	8575.75	7578.52	986.39	11413.3
mmu-miR-127-3p-0-1-C	655.38	670.8	NT tail	C	863.86	709.69	685.25	479.56	713.47	582.48	615.65	670.19
mmu-miR-127-3p-0-1-G	335.62	109.74	ambiguous tail	G	90.17	98.19	112.11	142.74	335.6	341.6	105.51	329.67
mmu-miR-127-3p-0-1-T	25786	27813.6	NT tail	U	34460	27664.3	29226.8	26830.5	25732.4	21392	20886.4	30233.8
mmu-miR-127-3p-0-2-AA	2501.69	44.75	NT tail	AA	138.89	15.17	25.17	21.29	2377.38	1824.29	23.23	3303.39
mmu-miR-127-3p-0-2-AC	631.73	40.05	NT tail	other	63.99	35.92	37.75	32.56	821.07	438.16	30.01	635.97
mmu-miR-127-3p-0-2-AG	612.96	4.88	NT tail	other	24	0.1	0.1	0.1	650.71	547.18	0.1	640.98
mmu-miR-127-3p-0-2-AT	29810.7	3912.18	NT tail	AU	5414.42	3755.2	4399.81	3432.07	30398.8	22291.2	2559.38	36742
mmu-miR-127-3p-0-2-CA	25.66	0.1	NT tail	other	0.1	0.1	0.1	0.1	30.74	14.54	0.1	31.72
mmu-miR-127-3p-0-2-CT	200.68	263.94	NT tail	other	378.85	265.04	237.95	261.69	187.01	171.32	176.18	243.71
mmu-miR-127-3p-0-2-GA	221.86	1.97	NT tail	other	9.45	0.1	0.1	0.1	254.9	166.13	0.1	244.54
mmu-miR-127-3p-0-2-GG	12.59	0.1	ambiguous tail	other	0.1	0.1	0.1	0.1	12.81	16.61	0.1	8.35
mmu-miR-127-3p-0-2-GT	280.82	70.5	NT tail	other	94.53	56.68	62.92	85.14	244.66	213.89	53.24	383.92
mmu-miR-127-3p-0-2-TA	2755.97	538.91	NT tail	UA	633.35	474.19	645.21	515.87	2861.57	2279.06	425.92	3127.28
mmu-miR-127-3p-0-2-TC	309.7	353.37	NT tail	other	441.38	323.31	412.98	356.86	295.89	271	232.32	362.22
mmu-miR-127-3p-0-2-TG	53.75	26.6	NT tail	other	22.54	26.34	32.03	37.56	65.33	55.03	14.52	40.9
mmu-miR-127-3p-0-2-TT	5638.51	6346.74	NT tail	UU	7812.58	6321.74	6685.52	6457.2	5849.95	4643.26	4456.65	6422.32
mmu-miR-127-3p-0-3-AAA	829.7	8.08	NT tail	AAA	39.99	0.1	0.1	0.1	823.63	563.79	0.1	1101.69
mmu-miR-127-3p-0-3-AAC	91.08	0.1	NT tail	other	0.1	0.1	0.1	0.1	120.41	64.37	0.1	88.47
mmu-miR-127-3p-0-3-AAG	204.43	0.1	NT tail	other	0.1	0.1	0.1	0.1	215.19	174.43	0.1	223.68
mmu-miR-127-3p-0-3-AAT	1326.97	16.62	NT tail	AAU	49.45	10.38	0.1	12.52	1539.66	872.17	10.65	1569.07
mmu-miR-127-3p-0-3-ACA	87.18	0.1	NT tail	other	0.1	0.1	0.1	0.1	84.54	76.83	0.1	100.15
mmu-miR-127-3p-0-3-ACT	128.49	2.7	NT tail	other	13.09	0.1	0.1	0.1	166.52	73.72	0.1	145.22
mmu-miR-127-3p-0-3-AGA	718.85	6.04	NT tail	other	29.81	0.1	0.1	0.1	1009.36	521.22	0.1	625.96
mmu-miR-127-3p-0-3-AGT	187.88	2.12	NT tail	other	10.18	0.1	0.1	0.1	234.41	133.94	0.1	195.3
mmu-miR-127-3p-0-3-ATA	2675.52	62.58	NT tail	AUA	145.43	42.31	38.9	38.82	3472.57	1716.3	47.43	2837.67
mmu-miR-127-3p-0-3-ATC	68.49	3.42	NT tail	other	16.72	0.1	0.1	0.1	101.19	50.88	0.1	53.42
mmu-miR-127-3p-0-3-ATG	84.32	0.1	NT tail	other	0.1	0.1	0.1	0.1	125.53	58.14	0.1	69.27
mmu-miR-127-3p-0-3-ATT	9567.32	1151.56	NT tail	AUU	1743	1117.62	1113.11	878.99	12750.3	6321.15	905.08	9630.57
mmu-miR-127-3p-0-3-CAA	13.44	0.1	NT tail	other	0.1	0.1	0.1	0.1	14.09	10.38	0.1	15.86
mmu-miR-127-3p-0-3-CTT	35.96	54.5	NT tail	other	59.63	46.3	65.21	50.08	52.52	27	51.3	28.38
mmu-miR-127-3p-0-3-GAA	18.44	0.1	NT tail	other	0.1	0.1	0.1	0.1	14.09	14.54	0.1	26.71
mmu-miR-127-3p-0-3-GAT	19.8	0.1	NT tail	other	0.1	0.1	0.1	0.1	20.49	23.88	0.1	15.02
mmu-miR-127-3p-0-3-GTT	13.79	0.1	NT tail	other	0.1	0.1	0.1	0.1	14.09	11.42	0.1	15.86
mmu-miR-127-3p-0-3-TAA	306.4	6.13	NT tail	UAA	18.91	0.1	11.44	0.1	293.33	233.62	0.1	392.27
mmu-miR-127-3p-0-3-TAC	64.03	9.03	NT tail	other	16.72	16.76	11.44	0.1	70.45	41.53	0.1	80.12
mmu-miR-127-3p-0-3-TAG	31.87	0.1	NT tail	other	0.1	0.1	0.1	0.1	33.3	19.73	0.1	42.57
mmu-miR-127-3p-0-3-TAT	1688.36	381.9	NT tail	UAU	526.46	372.81	427.86	378.14	1707.46	1267.76	204.25	2089.86
mmu-miR-127-3p-0-3-TCT	92	113.84	NT tail	other	160.7	135.71	106.39	118.95	94.79	68.53	47.43	112.67
mmu-miR-127-3p-0-3-TGA	182.29	9.56	NT tail	other	16.72	0.1	18.3	0.1	229.28	125.63	12.58	191.96
mmu-miR-127-3p-0-3-TGT	58.85	29.82	NT tail	other	39.99	27.94	33.18	23.79	51.24	60.22	24.2	65.1
mmu-miR-127-3p-0-3-TTA	177.94	47.41	NT tail	UUA	56.72	49.49	49.19	52.59	198.54	134.98	29.04	200.31
mmu-miR-127-3p-0-3-TTC	134.71	156.22	NT tail	other	243.6	146.09	155.58	169.04	147.31	92.41	66.79	164.42
mmu-miR-127-3p-0-3-TTT	1932.28	2687.51	NT tail	UUU	3686.69	2707.04	2710.13	2674.54	2219.83	1377.82	1659.14	2199.2
mmu-miR-127-3p-1-0--	255652	275431	trimmed	other	328063	275054	294937	225301	281710	217935	253799	267310
mmu-miR-127-3p-1-1-A	53695.9	32696.3	ambiguous tail	A	37082.9	31567.2	33888.6	25739.9	65726.5	44303.1	35203.1	51058.1
mmu-miR-127-3p-1-1-C	292.52	196.33	ambiguous tail	C	173.79	147.69	130.42	137.73	151.15	550.3	392.04	176.1
mmu-miR-127-3p-1-1-G	4085.44	3713.71	ambiguous tail	G	2579.23	3310.55	2443.58	4289.78	3087.01	6744.77	5945.43	2424.54
mmu-miR-127-3p-1-2-AA	5826.04	1313.39	ambiguous tail	AA	1652.1	1207.83	1627.91	1168.23	5291.47	4648.45	910.88	7538.2
mmu-miR-127-3p-1-2-AC	351.73	108.45	ambiguous tail	other	151.98	98.19	124.7	76.38	504.68	245.04	90.99	305.47
mmu-miR-127-3p-1-2-AG	406.6	34.11	ambiguous tail	other	37.81	36.72	29.74	27.55	395.8	384.17	38.72	439.84
mmu-miR-127-3p-1-2-AT	31534.7	22201	ambiguous tail	AU	26125.3	22021.9	25235.4	18344.9	33749.6	26086.2	19277.6	34768.2
mmu-miR-127-3p-1-2-GA	232.19	14.21	ambiguous tail	other	29.09	10.38	16.02	0.1	220.32	198.31	15.49	277.93
mmu-miR-127-3p-1-2-GT	367.67	215.5	ambiguous tail	other	266.14	207.56	239.1	195.33	375.31	318.76	169.4	408.96
mmu-miR-127-3p-1-3-AAA	314.54	11.06	ambiguous tail	AAA	16.72	14.37	24.02	0.1	307.42	213.89	0.1	422.31
mmu-miR-127-3p-1-3-AAC	49.6	0.1	ambiguous tail	other	0.1	0.1	0.1	0.1	74.29	39.46	0.1	35.05
mmu-miR-127-3p-1-3-AAG	54.47	0.1	ambiguous tail	other	0.1	0.1	0.1	0.1	57.64	45.69	0.1	60.09
mmu-miR-127-3p-1-3-AAT	942.69	159.65	ambiguous tail	AAU	250.87	142.1	157.87	117.7	993.99	695.66	129.71	1138.41
mmu-miR-127-3p-1-3-ACA	33.58	0.1	ambiguous tail	other	0.1	0.1	0.1	0.1	57.64	19.73	0.1	23.37
mmu-miR-127-3p-1-3-ACT	52.31	17.77	ambiguous tail	other	19.63	15.17	17.16	17.53	89.66	28.03	19.36	39.23
mmu-miR-127-3p-1-3-AGA	120.08	0.1	ambiguous tail	other	0.1	0.1	0.1	0.1	98.63	95.52	0.1	166.09
mmu-miR-127-3p-1-3-AGT	216.8	3.98	ambiguous tail	other	8	0.1	0.1	0.1	247.22	157.82	11.62	245.38
mmu-miR-127-3p-1-3-ATA	599.58	74.69	ambiguous tail	AUA	93.08	69.45	97.24	48.83	830.04	407.01	64.86	561.69
mmu-miR-127-3p-1-3-ATC	27.36	17.93	ambiguous tail	other	19.63	15.17	19.45	23.79	25.62	19.73	11.62	36.72
mmu-miR-127-3p-1-3-ATG	36.92	2.83	ambiguous tail	other	0.1	0.1	0.1	13.77	57.64	19.73	0.1	33.38
mmu-miR-127-3p-1-3-ATT	4436.18	2833.23	ambiguous tail	AUU	3506.36	2663.13	3213.49	2138.63	6195.8	3187.57	2644.56	3925.17
mmu-miR-127-3p-1-3-GAT	15.4	0.1	ambiguous tail	other	0.1	0.1	0.1	0.1	15.37	12.46	0.1	18.36
mmu-miR-127-3p-1-3-GTT	39.66	27.09	ambiguous tail	other	28.36	22.35	36.61	20.03	32.02	56.07	28.07	30.88
mmu-miR-127-3p-1-4-AAAT	31.68	0.1	ambiguous tail	other	0.1	0.1	0.1	0.1	44.83	13.5	0.1	36.72
mmu-miR-127-3p-1-4-AATA	49.34	0.1	ambiguous tail	other	0.1	0.1	0.1	0.1	74.29	27	0.1	46.74
mmu-miR-127-3p-1-4-AATT	141.2	22.59	ambiguous tail	other	34.18	23.15	27.46	17.53	188.29	101.75	10.65	133.54
mmu-miR-127-3p-1-4-ATAA	42.68	0.1	ambiguous tail	other	0.1	0.1	0.1	0.1	39.71	29.07	0.1	59.26
mmu-miR-127-3p-1-4-ATAT	67.97	9.76	ambiguous tail	other	14.54	8.78	0.1	13.77	60.2	56.07	11.62	87.63
mmu-miR-127-3p-1-4-ATTA	57.92	6.19	ambiguous tail	other	9.45	8.78	0.1	12.52	60.2	34.26	0.1	79.29
mmu-miR-127-3p-1-4-ATTT	179.76	158.86	ambiguous tail	other	200.7	148.48	179.61	159.02	140.9	163.01	106.48	235.36
mmu-miR-127-3p-2-0--	45459.5	52586	trimmed	other	56251.5	49338.1	53026.6	47294	47023.8	46167.8	57019.8	43186.9
mmu-miR-127-3p-2-1-A	23840.2	16145.9	ambiguous tail	A	15916	16322	19127.6	13149.8	19526.3	24892.1	16213.9	27102.3
mmu-miR-127-3p-2-1-G	78.27	78.04	ambiguous tail	G	58.9	74.24	54.91	67.61	46.11	115.25	134.55	73.45
mmu-miR-127-3p-2-1-T	5340.79	5976.79	ambiguous tail	U	7119.6	6214.77	6055.18	4873.26	4981.49	5444.83	5621.15	5596.06
mmu-miR-127-3p-2-2-AA	1004.07	587.52	ambiguous tail	AA	596.27	633.85	711.57	498.35	710.91	1031.03	497.55	1270.28
mmu-miR-127-3p-2-2-AC	57.3	12.38	ambiguous tail	other	21.81	15.97	11.44	0.1	64.05	47.76	12.58	60.09
mmu-miR-127-3p-2-2-AG	22.87	7.07	ambiguous tail	other	8	8.78	0.1	0.1	23.06	32.19	18.39	13.35
mmu-miR-127-3p-2-2-AT	195.44	121.2	ambiguous tail	AU	122.16	114.16	97.24	121.46	152.43	199.35	151.01	234.53
mmu-miR-127-3p-2-2-GT	17.47	18.72	ambiguous tail	other	22.54	17.56	16.02	20.03	14.09	16.61	17.42	21.7
mmu-miR-127-3p-2-2-TA	9525.43	5468.2	ambiguous tail	UA	6190.29	5263.99	5930.48	3917.89	11981.7	8279.37	6038.36	8315.22
mmu-miR-127-3p-2-2-TC	101.02	78.76	ambiguous tail	other	67.63	96.59	83.51	55.09	140.9	77.87	90.99	84.3
mmu-miR-127-3p-2-2-TG	270.25	179.1	ambiguous tail	other	187.61	164.45	183.04	146.5	290.77	255.42	213.93	264.57
mmu-miR-127-3p-2-2-TT	15774	15499	ambiguous tail	UU	17665.6	15549.3	16861.4	12838	15593.9	15156	14580.9	16572
mmu-miR-127-3p-2-3-AAA	66.38	38.48	ambiguous tail	AAA	37.81	44.7	45.76	35.06	73.01	68.53	29.04	57.59
mmu-miR-127-3p-2-3-AAC	32.15	0.1	ambiguous tail	other	0.1	0.1	0.1	0.1	26.9	31.15	0.1	38.39
mmu-miR-127-3p-2-3-AAT	37.12	12.59	ambiguous tail	AAU	14.54	19.16	19.45	0.1	33.3	36.34	9.68	41.73
mmu-miR-127-3p-2-3-AGA	54.06	3.55	ambiguous tail	other	9.45	7.98	0.1	0.1	49.96	48.8	0.1	63.43
mmu-miR-127-3p-2-3-ATT	29.17	11.91	ambiguous tail	AUU	23.27	11.97	12.58	0.1	28.18	30.11	11.62	29.21
mmu-miR-127-3p-2-3-TAA	191.5	86.06	ambiguous tail	UAA	109.8	93.4	78.94	81.39	222.88	124.6	66.79	227.01
mmu-miR-127-3p-2-3-TAC	46.47	11.71	ambiguous tail	other	16	14.37	12.58	0.1	38.43	42.57	15.49	58.42
mmu-miR-127-3p-2-3-TAT	291.85	165.25	ambiguous tail	UAU	223.96	183.61	157.87	164.03	297.17	217	96.8	361.39
mmu-miR-127-3p-2-3-TTA	21.31	8.76	ambiguous tail	UUA	20.36	23.15	0.1	0.1	24.34	10.38	0.1	29.21
mmu-miR-127-3p-2-3-TTT	102.05	92.48	ambiguous tail	UUU	146.16	86.22	85.8	93.91	129.37	79.95	50.34	96.81
mmu-miR-127-3p-2-4-TATA	30.27	4.4	ambiguous tail	other	0.1	7.98	13.73	0.1	25.62	25.96	0.1	39.23
mmu-miR-127-3p-2-4-TATT	133.43	76.43	ambiguous tail	other	105.44	88.61	50.34	73.88	171.64	93.45	63.89	135.21
mmu-miR-127-3p-3-0--	126.87	143	trimmed	other	135.98	120.54	138.42	53.84	83.26	213.89	266.2	83.46
mmu-miR-127-3p-3-1-A	368.54	100.52	ambiguous tail	A	106.89	103.78	115.54	77.63	325.35	322.91	98.74	457.37
mmu-miR-127-3p-3-1-T	51.25	62.31	ambiguous tail	U	58.9	89.41	60.63	42.57	44.83	44.65	60.02	64.26
mmu-miR-127-3p-3-2-AC	87.79	56.77	ambiguous tail	other	35.63	27.14	40.04	30.05	28.18	207.66	151.01	27.54
mmu-miR-127-3p-3-2-TC	33.97	26.87	ambiguous tail	other	24.72	25.55	16.02	31.3	32.02	45.69	36.78	24.2
mmu-miR-127-3p-3-3-ACT	33.23	30.78	ambiguous tail	other	53.81	35.13	37.75	0.1	30.74	23.88	27.1	45.07
mmu-miR-127-3p-3-3-TCT	55.87	49.07	ambiguous tail	other	50.17	41.51	37.75	50.08	47.39	80.99	65.82	39.23
mmu-miR-127-3p-4-3-AGC	18.63	18.98	ambiguous tail	other	28.36	23.15	18.3	12.52	19.21	12.46	12.58	24.2
mmu-miR-127-3p-4-3-TGC	37.32	30.71	ambiguous tail	other	23.27	22.35	19.45	40.07	42.27	44.65	48.4	25.04
mmu-miR-127-3p-4-4-AGCT	31.21	41.48	ambiguous tail	other	66.17	43.91	50.34	15.03	20.49	23.88	31.94	49.24
mmu-miR-127-3p-4-4-CGCT	14.6	5.68	ambiguous tail	other	11.63	0.1	0.1	0.1	12.81	17.65	16.46	13.35
mmu-miR-127-3p-4-4-TGCT	62.24	50.92	ambiguous tail	other	47.27	37.52	20.59	68.87	53.8	86.18	80.34	46.74
mmu-miR-127-3p-5-4-AGGC	57.41	63.78	ambiguous tail	other	98.17	90.21	57.2	28.8	51.24	46.72	44.53	74.28
mmu-miR-127-3p-5-4-CGGC	30.23	42.22	ambiguous tail	other	59.63	51.09	46.9	13.77	30.74	33.23	39.69	26.71
mmu-miR-127-3p-5-5-AGGCA	12.55	6.33	ambiguous tail	other	0.1	11.97	0.1	0.1	15.37	11.42	19.36	10.85
mmu-miR-127-3p-5-5-AGGCT	116.78	103.92	ambiguous tail	other	135.98	106.97	128.13	70.12	87.1	103.83	78.41	159.41
mmu-miR-127-3p-5-5-CGGCT	64.89	75.11	ambiguous tail	other	102.53	68.65	109.82	41.32	57.64	56.07	53.24	80.96
mmu-miR-127-3p-6-4-GTGG	25.63	24.23	ambiguous tail	other	13.82	25.55	14.87	17.53	21.78	38.42	49.37	16.69
mmu-miR-127-3p-6-5-ATGGC	45.47	51.91	ambiguous tail	other	67.63	63.07	43.47	35.06	58.92	24.92	50.34	52.58
mmu-miR-127-3p-6-5-CTGGC	42.73	50.8	ambiguous tail	other	68.35	55.88	53.77	36.31	38.43	32.19	39.69	57.59
mmu-miR-127-3p-6-5-GTGGC	12.45	7.13	ambiguous tail	other	10.18	0.1	25.17	0.1	12.81	14.54	0.1	10.02
mmu-miR-127-3p-6-6-ATGGCT	72.17	72.15	ambiguous tail	other	91.62	77.44	73.22	61.35	64.05	53.99	57.11	98.48
mmu-miR-127-3p-6-6-CTGGCT	87.8	100.75	ambiguous tail	other	129.43	109.37	117.83	63.86	75.57	76.83	83.25	111
mmu-miR-127-3p-6-6-GTCGCT	41.01	69.95	ambiguous tail	other	159.97	126.13	48.05	0.1	46.11	17.65	15.49	59.26
mmu-miR-127-3p-6-6-GTGGCT	30.33	29.86	ambiguous tail	other	26.18	15.97	41.18	26.29	26.9	37.38	39.69	26.71
mmu-miR-127-3p-7-6-ATTGGC	46.84	40.53	ambiguous tail	other	47.99	23.15	18.3	63.86	51.24	46.72	49.37	42.57
mmu-miR-127-3p-7-6-TTTGGC	20.3	18.81	ambiguous tail	other	21.09	24.75	29.74	0.1	29.46	15.57	18.39	15.86
mmu-miR-127-3p-7-7-ATTGGCT	92.44	68.72	ambiguous tail	other	74.17	55.08	45.76	68.87	84.54	93.45	99.7	99.32
mmu-miR-127-3p-7-7-TTTGGCT	49.78	39.05	ambiguous tail	other	55.26	40.71	45.76	22.54	43.55	45.69	30.98	60.09
mmu-miR-127-3p-8-7-CCTTGGC	26.78	24.07	ambiguous tail	other	26.18	12.77	25.17	0.1	19.21	47.76	56.14	13.35
mmu-miR-127-3p-8-7-TCTTGGC	28.89	29.79	ambiguous tail	other	39.27	23.95	0.1	48.83	38.43	33.23	36.78	15.02
mmu-miR-127-3p-8-8-ACTTGGCT	21.89	21.05	ambiguous tail	other	28.36	31.93	27.46	0.1	19.21	15.57	17.42	30.88
mmu-miR-127-3p-8-8-CCTTGGCT	35.87	32.45	ambiguous tail	other	25.45	25.55	26.31	28.8	19.21	59.18	56.14	29.21
mmu-miR-127-3p-8-8-TCTTGGCT	64.65	45.67	ambiguous tail	other	44.36	34.33	35.46	42.57	69.17	83.06	71.63	41.73
mmu-miR-127-3p-9-8-GGCTTGGC	51.54	73.59	ambiguous tail	other	97.44	83.02	84.66	56.35	46.11	42.57	46.46	65.93
mmu-miR-127-3p-9-9-GGCTTGGCT	124.92	137.49	ambiguous tail	other	152.7	144.49	197.91	92.66	103.75	96.56	99.7	174.43
mmu-miR-127-3p-9-9-TGCTTGGCT	31.8	32.64	ambiguous tail	other	35.63	24.75	26.31	30.05	20.49	41.53	46.46	33.38
mmu-miR-127-5p-0-0--	177.15	226.56	canonical	other	269.78	237.1	312.31	157.77	178.05	99.68	155.85	253.72
mmu-miR-127-5p-0-1-A	11.38	12.33	NT tail	A	13.82	15.17	21.74	1.25	7.69	7.27	9.68	19.2
mmu-miR-127-5p-0-1-T	333.87	398.71	ambiguous tail	U	493.01	429.49	568.57	217.87	335.6	221.16	284.59	444.85
mmu-miR-127-5p-0-2-CT	4.32	1.5	NT tail	other	2.18	3.19	0.1	0.1	1.28	4.15	1.94	7.51
mmu-miR-127-5p-0-2-TT	22.64	35.59	NT tail	UU	42.9	47.1	45.76	23.79	25.62	11.42	18.39	30.88
mmu-miR-127-5p-1-0--	27.47	38.32	trimmed	other	45.81	48.7	43.47	18.78	39.71	17.65	34.85	25.04
mmu-miR-127-5p-1-1-A	2.16	0.66	ambiguous tail	A	2.91	0.1	0.1	0.1	1.28	1.04	0.1	4.17
mmu-miR-127-5p-2-1-T	8.19	23.86	ambiguous tail	U	24.72	26.34	14.87	38.82	8.97	7.27	14.52	8.35
mmu-miR-127-5p-3-0--	5.46	4.74	trimmed	other	16	5.59	0.1	0.1	5.12	2.08	1.94	9.18
mmu-miR-128-1-5p-0-0--	599.76	747.42	canonical	other	577.36	666.58	1122.26	768.8	407.33	607.4	602.09	784.53
mmu-miR-128-1-5p-0-1-G	45.42	58.68	ambiguous tail	G	35.63	57.48	85.8	65.11	37.15	41.53	49.37	57.59
mmu-miR-128-1-5p-0-2-GA	416.87	412.56	ambiguous tail	other	370.85	467.01	459.89	449.51	347.13	342.64	315.57	560.86
mmu-miR-128-1-5p-0-3-GAA	25.79	26.95	NT tail	other	21.09	25.55	33.18	28.8	32.02	27	26.14	18.36
mmu-miR-128-1-5p-0-3-GAT	3.9	1.91	NT tail	other	5.82	1.6	0.1	0.1	1.28	2.08	1.94	8.35
mmu-miR-128-1-5p-1-0--	8.11	3.89	trimmed	other	1.45	7.18	5.72	5.01	6.4	2.08	0.1	15.86
mmu-miR-128-1-5p-2-0--	9.55	12.45	trimmed	other	16	11.18	13.73	8.76	3.84	7.27	12.58	17.53
mmu-miR-128-2-5p-0-0--	41.49	39.3	canonical	other	28.36	29.54	36.61	40.07	34.58	49.84	61.95	40.06
mmu-miR-128-2-5p-1-0--	12.15	11.75	trimmed	other	5.82	7.98	9.15	21.29	17.93	13.5	14.52	5.01
mmu-miR-128-2-5p-1-1-T	8.54	7.28	ambiguous tail	U	5.09	10.38	0.1	15.03	7.69	2.08	5.81	15.86
mmu-miR-128-2-5p-2-0--	16.31	14.93	trimmed	other	13.09	19.96	8.01	20.03	25.62	12.46	13.55	10.85
mmu-miR-128-2-5p-3-0--	4.18	7.2	trimmed	other	9.45	6.39	10.3	5.01	1.28	2.08	4.84	9.18
mmu-miR-128-2-5p-3-1-T	1.4	1.94	ambiguous tail	U	0.1	3.99	1.14	2.5	1.28	2.08	1.94	0.83
mmu-miR-128-3p-1-2-0-0--	28729	32389.7	canonical	other	31470.7	37451.4	25319	26593.8	29873.6	29750.3	41113.7	26563.1
mmu-miR-128-3p-1-2-0-1-A	2626.38	209.83	NT tail	A	253.05	213.15	156.73	146.5	2267.23	3182.38	279.75	2429.55
mmu-miR-128-3p-1-2-0-1-C	13957.6	14414.7	NT tail	C	14615.9	15063.9	13148	17263	15319.8	12405.6	11982.8	14147.5
mmu-miR-128-3p-1-2-0-1-G	94.97	11.54	NT tail	G	7.27	12.77	11.44	0.1	75.57	118.37	26.14	90.97
mmu-miR-128-3p-1-2-0-1-T	12118.9	13261.9	NT tail	U	13021.2	15340.9	10269.7	11132.6	12213.6	13416.9	16545	10726.4
mmu-miR-128-3p-1-2-0-2-AA	266.68	8.11	NT tail	AA	18.18	9.58	12.58	0.1	301.02	233.62	0.1	265.41
mmu-miR-128-3p-1-2-0-2-AC	153.31	0.1	NT tail	other	0.1	0.1	0.1	0.1	57.64	306.3	0.1	95.98
mmu-miR-128-3p-1-2-0-2-AG	41.27	0.1	NT tail	other	0.1	0.1	0.1	0.1	32.02	50.88	0.1	40.9
mmu-miR-128-3p-1-2-0-2-AT	885.8	60.01	NT tail	AU	69.08	56.68	45.76	80.14	1091.34	673.85	48.4	892.2
mmu-miR-128-3p-1-2-0-2-CA	586.81	50.54	NT tail	other	79.99	43.91	25.17	60.1	755.74	386.25	43.56	618.45
mmu-miR-128-3p-1-2-0-2-CC	33.53	26.16	NT tail	other	24.72	29.54	19.45	21.29	34.58	25.96	35.82	40.06
mmu-miR-128-3p-1-2-0-2-CG	30.36	0.1	NT tail	other	0.1	0.1	0.1	0.1	38.43	30.11	0.1	22.53
mmu-miR-128-3p-1-2-0-2-CT	533.69	565.71	NT tail	other	546.82	603.51	503.36	753.78	654.55	378.98	421.08	567.53
mmu-miR-128-3p-1-2-0-2-GA	39.12	0.1	NT tail	other	0.1	0.1	0.1	0.1	39.71	34.26	0.1	43.4
mmu-miR-128-3p-1-2-0-2-GT	44.69	7.65	NT tail	other	8	15.17	14.87	0.1	35.87	58.14	0.1	40.06
mmu-miR-128-3p-1-2-0-2-TA	301.3	22.83	NT tail	UA	31.99	36.72	11.44	0.1	329.2	287.61	33.88	287.11
mmu-miR-128-3p-1-2-0-2-TC	145.12	125.04	NT tail	other	112.71	116.55	112.11	171.54	114	170.28	112.29	151.06
mmu-miR-128-3p-1-2-0-2-TG	24.95	0.1	NT tail	other	0.1	0.1	0.1	0.1	20.49	21.8	0.1	32.55
mmu-miR-128-3p-1-2-0-2-TT	1125.7	1275.41	NT tail	UU	1334.33	1514.38	940.37	1252.12	1160.51	1075.67	1335.83	1140.91
mmu-miR-128-3p-1-2-0-3-AAT	64.88	0.1	NT tail	AAU	0.1	0.1	0.1	0.1	66.61	61.26	0.1	66.77
mmu-miR-128-3p-1-2-0-3-ACA	17.8	0.1	NT tail	other	0.1	0.1	0.1	0.1	21.78	16.61	0.1	15.02
mmu-miR-128-3p-1-2-0-3-AGA	44.52	0.1	NT tail	other	0.1	0.1	0.1	0.1	61.48	27	0.1	45.07
mmu-miR-128-3p-1-2-0-3-AGT	35.78	0.1	NT tail	other	0.1	0.1	0.1	0.1	38.43	32.19	0.1	36.72
mmu-miR-128-3p-1-2-0-3-ATA	12.55	0.1	NT tail	AUA	0.1	0.1	0.1	0.1	15.37	11.42	0.1	10.85
mmu-miR-128-3p-1-2-0-3-ATT	43.45	0.1	NT tail	AUU	0.1	0.1	0.1	0.1	58.92	32.19	0.1	39.23
mmu-miR-128-3p-1-2-0-3-CTT	20.24	17.02	NT tail	other	24	24.75	21.74	0.1	30.74	12.46	14.52	17.53
mmu-miR-128-3p-1-2-0-3-TAA	30.06	0.1	NT tail	UAA	0.1	0.1	0.1	0.1	42.27	14.54	0.1	33.38
mmu-miR-128-3p-1-2-0-3-TAT	71.59	7.25	NT tail	UAU	10.91	0.1	0.1	25.04	87.1	46.72	0.1	80.96
mmu-miR-128-3p-1-2-0-3-TTC	15.94	12.57	NT tail	other	21.81	11.97	0.1	12.52	14.09	14.54	16.46	19.2
mmu-miR-128-3p-1-2-0-3-TTT	131.8	119.26	NT tail	UUU	143.25	147.69	75.5	121.46	138.34	131.86	108.42	125.19
mmu-miR-128-3p-1-2-1-0--	5194.32	6686.19	trimmed	other	6133.58	6917.27	5480.89	6107.86	5541.25	5473.9	8791.34	4567.82
mmu-miR-128-3p-1-2-1-1-A	210.38	15.2	ambiguous tail	A	22.54	17.56	12.58	0.1	165.24	222.2	23.23	243.71
mmu-miR-128-3p-1-2-1-1-C	66.01	78.73	ambiguous tail	C	58.17	78.23	74.36	106.43	80.7	70.6	76.47	46.74
mmu-miR-128-3p-1-2-1-1-G	32.14	12.24	ambiguous tail	G	9.45	14.37	0.1	15.03	26.9	35.3	22.26	34.22
mmu-miR-128-3p-1-2-1-2-AA	100.75	0.1	ambiguous tail	AA	0.1	0.1	0.1	0.1	89.66	92.41	0.1	120.18
mmu-miR-128-3p-1-2-1-2-AC	13.29	0.1	ambiguous tail	other	0.1	0.1	0.1	0.1	14.09	16.61	0.1	9.18
mmu-miR-128-3p-1-2-1-2-AG	16.78	0.1	ambiguous tail	other	0.1	0.1	0.1	0.1	14.09	14.54	0.1	21.7
mmu-miR-128-3p-1-2-1-2-AT	233.11	11.99	ambiguous tail	AU	21.81	20.76	17.16	0.1	253.62	166.13	0.1	279.59
mmu-miR-128-3p-1-2-1-3-AAC	20.01	0.1	ambiguous tail	other	0.1	0.1	0.1	0.1	14.09	34.26	0.1	11.68
mmu-miR-128-3p-1-2-1-3-AAT	55.3	0.1	ambiguous tail	AAU	0.1	0.1	0.1	0.1	57.64	49.84	0.1	58.42
mmu-miR-128-3p-1-2-1-3-AGA	39.9	0.1	ambiguous tail	other	0.1	0.1	0.1	0.1	32.02	34.26	0.1	53.42
mmu-miR-128-3p-1-2-2-0--	2027.25	2699.25	trimmed	other	2281.82	2499.48	2132.41	3055.18	2017.45	2189.77	3527.38	1874.53
mmu-miR-128-3p-1-2-2-1-A	19.42	0.1	ambiguous tail	A	0.1	0.1	0.1	0.1	16.65	24.92	0.1	16.69
mmu-miR-128-3p-1-2-3-0--	246.07	355.42	trimmed	other	287.95	332.09	276.85	419.46	207.51	284.49	460.77	246.21
mmu-miR-128-3p-1-2-3-1-A	46.14	0.1	ambiguous tail	A	0.1	0.1	0.1	0.1	57.64	37.38	0.1	43.4
mmu-miR-128-3p-1-2-3-3-CTT	20.07	24.97	ambiguous tail	other	25.45	33.53	21.74	23.79	26.9	12.46	20.33	20.87
mmu-miR-128-3p-1-2-4-3-TTT	14.84	10.98	ambiguous tail	UUU	12.36	10.38	0.1	0.1	16.65	18.69	31.94	9.18
mmu-miR-129-5p-1-2-0-0--	1262.96	1504.54	canonical	other	1633.92	1561.48	1693.12	850.19	1054.2	1376.78	1784.02	1357.91
mmu-miR-129-5p-1-2-0-1-A	26.96	7.88	NT tail	A	12.36	9.58	5.72	0.1	20.49	22.84	11.62	37.56
mmu-miR-129-5p-1-2-0-1-C	3.35	6.81	NT tail	C	3.64	3.99	11.44	6.26	2.56	4.15	8.71	3.34
mmu-miR-129-5p-1-2-0-1-T	87.96	85.26	NT tail	U	107.62	69.45	125.84	48.83	70.45	88.26	74.54	105.16
mmu-miR-129-5p-1-2-0-2-TT	6.8	6.97	NT tail	UU	9.45	11.18	6.86	2.5	7.69	5.19	4.84	7.51
mmu-miR-129-5p-1-2-0-3-ATT	6.62	2.48	NT tail	AUU	5.82	0.1	0.1	6.26	2.56	7.27	0.1	10.02
mmu-miR-129-5p-1-2-0-3-TGT	8.87	7.76	NT tail	other	8.73	4.79	9.15	11.27	6.4	9.34	4.84	10.85
mmu-miR-129-5p-1-2-1-0--	95.46	120.5	trimmed	other	90.17	93.4	152.15	96.41	92.23	109.02	170.37	85.13
mmu-miR-129-5p-1-2-1-1-A	18.85	0.66	ambiguous tail	A	0.1	0.1	0.1	0.1	6.4	30.11	2.9	20.03
mmu-miR-129-5p-1-2-1-1-T	83.2	96.1	ambiguous tail	U	98.17	81.43	113.26	67.61	94.79	87.22	120.03	67.6
mmu-miR-129-5p-1-2-1-2-TT	4.96	8.25	ambiguous tail	UU	12.36	5.59	4.58	10.02	3.84	5.19	8.71	5.84
mmu-miR-129-5p-1-2-2-0--	52.99	69.61	trimmed	other	85.8	59.07	53.77	52.59	57.64	61.26	96.8	40.06
mmu-miR-129-5p-1-2-2-1-T	9.35	9.96	ambiguous tail	U	9.45	7.18	13.73	8.76	6.4	12.46	10.65	9.18
mmu-miR-129-5p-1-2-3-0--	9.89	8.09	trimmed	other	5.82	9.58	4.58	5.01	5.12	18.69	15.49	5.84
mmu-miR-1298-3p-0-0--	599.36	347.67	canonical	other	503.92	341.67	232.23	313.03	454.73	423.62	347.51	919.74
mmu-miR-1298-3p-0-1-A	3.07	0.27	NT tail	A	0.1	0.1	0.1	0.1	2.56	4.15	0.97	2.5
mmu-miR-1298-3p-1-0--	12.19	6.83	trimmed	other	8	5.59	6.86	5.01	5.12	11.42	8.71	20.03
mmu-miR-1298-3p-1-1-G	3.71	2.86	ambiguous tail	G	2.18	3.19	2.29	3.76	3.84	3.11	2.9	4.17
mmu-miR-1298-5p-0-0--	3943.87	1719.62	canonical	other	3563.07	1282.87	590.3	1686.61	1321.91	3430.53	1475.23	7079.16
mmu-miR-1298-5p-0-1-A	87.4	27.39	NT tail	A	61.08	19.16	0.1	27.55	20.49	70.6	29.04	171.1
mmu-miR-1298-5p-0-1-T	71.12	36.41	NT tail	U	71.26	21.55	5.72	43.82	20.49	72.68	39.69	120.18
mmu-miR-1298-5p-0-2-AA	9.83	1.68	NT tail	AA	8	0.1	0.1	0.1	5.12	9.34	0.1	15.02
mmu-miR-1298-5p-0-2-AT	157.75	29.06	NT tail	AU	53.81	18.36	3.43	42.57	60.2	105.91	27.1	307.14
mmu-miR-1298-5p-0-2-GT	13.01	0.1	NT tail	other	0.1	0.1	0.1	0.1	3.84	13.5	0.1	21.7
mmu-miR-1298-5p-1-0--	429.24	192.73	trimmed	other	402.85	142.9	60.63	175.3	108.88	316.68	181.98	862.15
mmu-miR-1298-5p-1-1-T	82.9	37.41	ambiguous tail	U	75.62	23.15	18.3	43.82	20.49	99.68	26.14	128.53
mmu-miR-1298-5p-2-0--	36.81	16.3	trimmed	other	38.54	9.58	2.29	17.53	8.97	32.19	13.55	69.27
mmu-miR-1298-5p-3-0--	18.51	9.29	trimmed	other	15.27	3.99	0.1	21.29	5.12	18.69	5.81	31.72
mmu-miR-1298-5p-3-1-T	19.44	11.64	ambiguous tail	U	13.82	7.18	4.58	20.03	8.97	17.65	12.58	31.72
mmu-miR-130b-3p-0-0--	28.07	33.91	canonical	other	38.54	35.13	18.3	47.58	30.74	30.11	30.01	23.37
mmu-miR-130b-3p-0-1-A	11.92	1.08	NT tail	A	0.1	0.1	0.1	5.01	6.4	13.5	0.1	15.86
mmu-miR-130b-3p-0-1-T	72.71	87.34	NT tail	U	95.26	91.01	72.07	86.4	99.91	62.3	91.96	55.92
mmu-miR-130b-3p-1-0--	9.17	12.25	trimmed	other	8	7.98	11.44	12.52	2.56	16.61	21.3	8.35
mmu-miR-130b-3p-2-0--	12.69	15.55	trimmed	other	20.36	7.98	11.44	13.77	7.69	18.69	24.2	11.68
mmu-miR-130b-5p-0-0--	58.77	43.61	canonical	other	44.36	35.13	35.46	78.88	98.63	30.11	24.2	47.57
mmu-miR-130b-5p-0-1-G	5.48	3.37	NT tail	G	3.64	1.6	3.43	6.26	7.69	2.08	1.94	6.68
mmu-miR-130b-5p-1-0--	3.09	2.35	trimmed	other	2.91	0.1	1.14	7.51	3.84	2.08	0.1	3.34
mmu-miR-130b-5p-2-0--	1.68	1.01	trimmed	other	2.91	0.8	1.14	0.1	1.28	2.08	0.1	1.67
mmu-miR-132-3p-0-0--	1834.58	2105.53	canonical	other	1657.19	1948.65	1920.77	1780.52	1674.16	2405.73	3220.52	1423.84
mmu-miR-132-3p-0-1-A	64.03	12.32	NT tail	A	10.18	15.97	0.1	15.03	56.36	62.3	20.33	73.45
mmu-miR-132-3p-0-1-C	54.21	60.42	ambiguous tail	C	37.09	57.48	91.52	67.61	76.86	37.38	48.4	48.41
mmu-miR-132-3p-0-1-T	755.46	924.73	NT tail	U	870.41	948.38	1228.65	671.14	448.32	814.02	905.08	1004.04
mmu-miR-132-3p-0-2-TT	33.99	52.79	NT tail	UU	45.81	53.49	59.49	53.84	23.06	32.19	51.3	46.74
mmu-miR-132-3p-1-0--	2565.24	2885.51	trimmed	other	2803.19	2769.3	3037.31	2828.55	2655.34	2800.29	2989.17	2240.09
mmu-miR-132-3p-1-1-A	18.5	6.9	ambiguous tail	A	0.1	0.1	14.87	8.76	15.37	30.11	10.65	10.02
mmu-miR-132-3p-1-1-T	41.69	57.81	ambiguous tail	U	70.53	58.28	48.05	55.09	40.99	45.69	57.11	38.39
mmu-miR-132-3p-2-0--	70.18	126.86	trimmed	other	105.44	114.96	132.7	130.22	42.27	113.17	151.01	55.08
mmu-miR-132-3p-2-1-A	61.7	50.26	ambiguous tail	A	45.08	40.71	62.92	63.86	66.61	46.72	38.72	71.78
mmu-miR-132-3p-3-0--	17.2	24.66	trimmed	other	20.36	20.76	17.16	26.29	17.93	27	38.72	6.68
mmu-miR-132-5p-0-0--	21.79	23.76	canonical	other	16	24.75	20.59	31.3	15.37	16.61	26.14	33.38
mmu-miR-132-5p-0-1-T	6.44	5.99	ambiguous tail	U	5.82	6.39	9.15	3.76	6.4	6.23	4.84	6.68
mmu-miR-132-5p-1-0--	14.66	24.19	trimmed	other	26.18	15.17	27.46	25.04	10.25	14.54	27.1	19.2
mmu-miR-132-5p-2-0--	68.59	49.83	trimmed	other	47.99	64.66	33.18	50.08	61.48	63.34	53.24	80.96
mmu-miR-132-5p-3-0--	42.79	29.88	trimmed	other	30.54	27.94	37.75	12.52	25.62	64.37	40.66	38.39
mmu-miR-134-3p-0-0--	47.22	66.75	canonical	other	71.99	87.01	89.23	52.59	43.55	32.19	32.91	65.93
mmu-miR-134-3p-0-1-A	10.68	19.57	ambiguous tail	A	41.45	18.36	22.88	11.27	6.4	7.27	3.87	18.36
mmu-miR-134-3p-0-3-ATT	6.15	5.86	NT tail	AUU	1.45	3.19	18.3	6.26	5.12	4.15	0.1	9.18
mmu-miR-134-5p-0-0--	201.36	210.33	canonical	other	292.32	209.15	218.5	169.04	185.73	175.47	162.62	242.87
mmu-miR-134-5p-0-1-A	31.12	5.17	NT tail	A	5.82	8.78	4.58	3.76	35.87	16.61	2.9	40.9
mmu-miR-134-5p-0-1-T	13.13	27.02	NT tail	U	34.18	25.55	28.6	31.3	10.25	12.46	15.49	16.69
mmu-miR-134-5p-0-2-AA	5.93	0.37	NT tail	AA	0.73	0.8	0.1	0.1	11.53	2.08	0.1	4.17
mmu-miR-134-5p-0-2-AT	3.51	0.1	NT tail	AU	0.1	0.1	0.1	0.1	5.12	2.08	0.1	3.34
mmu-miR-134-5p-0-3-AAT	1.68	0.1	NT tail	AAU	0.1	0.1	0.1	0.1	1.28	2.08	0.1	1.67
mmu-miR-134-5p-1-0--	39.12	52.93	trimmed	other	57.45	48.7	64.06	45.08	39.71	34.26	49.37	43.4
mmu-miR-134-5p-1-1-A	34.88	4.98	ambiguous tail	A	5.82	8.78	2.29	1.25	39.71	33.23	6.78	31.72
mmu-miR-134-5p-1-1-T	7.34	19.69	ambiguous tail	U	26.18	15.97	17.16	27.55	14.09	2.08	11.62	5.84
mmu-miR-134-5p-1-2-AA	20.01	1.24	ambiguous tail	AA	2.91	0.8	1.14	1.25	10.25	15.57	0.1	34.22
mmu-miR-134-5p-1-2-AG	5.09	0.47	ambiguous tail	other	0.1	0.1	0.1	0.1	11.53	2.08	1.94	1.67
mmu-miR-134-5p-1-2-AT	9.4	3.43	ambiguous tail	AU	2.91	3.99	8.01	1.25	3.84	13.5	0.97	10.85
mmu-miR-134-5p-1-2-TT	4.81	6.96	ambiguous tail	UU	8.73	7.98	11.44	3.76	2.56	5.19	2.9	6.68
mmu-miR-134-5p-1-3-AAT	13.43	0.89	ambiguous tail	AAU	0.73	0.1	3.43	0.1	20.49	3.11	0.1	16.69
mmu-miR-134-5p-1-3-ACT	1.76	0.1	ambiguous tail	other	0.1	0.1	0.1	0.1	2.56	1.04	0.1	1.67
mmu-miR-134-5p-1-3-ATT	7.53	1.04	ambiguous tail	AUU	2.91	0.1	1.14	0.1	11.53	1.04	0.97	10.02
mmu-miR-134-5p-2-0--	42.17	63.1	trimmed	other	69.81	66.26	68.64	48.83	48.67	39.46	61.95	38.39
mmu-miR-134-5p-2-1-A	5.04	5.07	ambiguous tail	A	4.36	5.59	4.58	5.01	5.12	4.15	5.81	5.84
mmu-miR-134-5p-2-1-T	3.98	8.25	ambiguous tail	U	13.09	12.77	4.58	5.01	2.56	5.19	5.81	4.17
mmu-miR-134-5p-2-2-AT	3.91	2.54	ambiguous tail	AU	0.1	5.59	2.29	3.76	2.56	4.15	0.97	5.01
mmu-miR-134-5p-3-0--	2.17	7.14	trimmed	other	10.18	11.18	2.29	6.26	2.56	3.11	5.81	0.83
mmu-miR-134-5p-3-1-A	42.12	27.4	ambiguous tail	A	39.99	30.34	25.17	25.04	56.36	24.92	16.46	45.07
mmu-miR-134-5p-3-1-T	5.52	21.63	ambiguous tail	U	20.36	23.95	19.45	25.04	3.84	5.19	19.36	7.51
mmu-miR-134-5p-3-2-AA	34.34	28.97	ambiguous tail	AA	20.36	30.34	40.04	33.81	30.74	28.03	20.33	44.23
mmu-miR-134-5p-3-2-AT	1.05	1.12	ambiguous tail	AU	0.73	1.6	0.1	1.25	1.28	1.04	1.94	0.83
mmu-miR-134-5p-3-2-TT	2.73	1.72	ambiguous tail	UU	2.91	3.19	1.14	1.25	2.56	3.11	0.1	2.5
mmu-miR-134-5p-3-3-AAT	9.68	8.43	ambiguous tail	AAU	13.09	5.59	5.72	10.02	3.84	9.34	7.74	15.86
mmu-miR-135a-1-3p-1-3-TTT	1.48	1.25	ambiguous tail	UUU	2.18	0.1	0.1	3.76	2.56	1.04	0.1	0.83
mmu-miR-135a-2-3p-0-1-A	5.71	5.8	NT tail	A	5.82	11.18	0.1	1.25	2.56	10.38	10.65	4.17
mmu-miR-135a-2-3p-0-1-T	10.98	17.13	NT tail	U	10.91	18.36	8.01	21.29	10.25	13.5	27.1	9.18
mmu-miR-135a-5p-1-2-0-0--	106.26	142.88	canonical	other	202.15	200.37	76.65	93.91	65.33	143.28	141.33	110.17
mmu-miR-135a-5p-1-2-1-0--	18.5	21.7	trimmed	other	16.72	29.54	12.58	22.54	5.12	27	27.1	23.37
mmu-miR-135a-5p-1-2-1-1-G	12.86	16.76	ambiguous tail	G	10.91	16.76	3.43	27.55	5.12	25.96	25.17	7.51
mmu-miR-135a-5p-1-2-2-0--	12.08	17.59	trimmed	other	21.81	19.16	12.58	15.03	10.25	17.65	19.36	8.35
mmu-miR-135a-5p-1-2-3-0--	3.58	1.41	trimmed	other	2.18	1.6	0.1	1.25	5.12	3.11	1.94	2.5
mmu-miR-135b-5p-0-0--	9.13	12.27	canonical	other	18.91	16.76	4.58	16.28	12.81	6.23	4.84	8.35
mmu-miR-135b-5p-0-1-A	13.67	11.2	NT tail	A	10.91	15.97	4.58	10.02	16.65	13.5	14.52	10.85
mmu-miR-135b-5p-1-0--	16.63	20.47	trimmed	other	16	31.13	9.15	23.79	24.34	23.88	22.26	1.67
mmu-miR-135b-5p-1-1-T	7.85	5.61	ambiguous tail	U	5.09	11.18	6.86	0.1	10.25	12.46	4.84	0.83
mmu-miR-135b-5p-2-0--	12.54	13.76	trimmed	other	10.18	22.35	8.01	5.01	15.37	15.57	23.23	6.68
mmu-miR-136-3p-0-0--	179.09	170.82	canonical	other	167.25	208.36	136.14	177.8	261.31	151.59	164.56	124.36
mmu-miR-136-3p-1-0--	2061.03	1737.9	trimmed	other	1827.35	2070.79	1135.99	1984.62	3412.37	1479.57	1670.76	1291.14
mmu-miR-136-3p-2-0--	129.59	139.93	trimmed	other	130.16	146.09	125.84	112.69	160.11	136.02	184.89	92.64
mmu-miR-136-5p-0-0--	21.44	33.44	canonical	other	43.63	35.92	13.73	31.3	3.84	48.8	42.59	11.68
mmu-miR-136-5p-1-0--	1122.2	1388.46	trimmed	other	1215.81	1179.89	764.19	1034.25	590.5	2013.26	2748.14	762.83
mmu-miR-136-5p-2-1-A	5.16	6.86	ambiguous tail	A	5.09	11.97	4.58	0.1	2.56	6.23	12.58	6.68
mmu-miR-137-3p-0-0--	80.62	84.84	canonical	other	84.35	110.17	81.22	40.07	78.14	102.79	108.42	60.93
mmu-miR-137-3p-0-1-A	9.06	4.63	NT tail	A	4.36	9.58	5.72	2.5	5.12	14.54	0.97	7.51
mmu-miR-137-3p-0-1-T	33.89	24.28	ambiguous tail	U	31.99	31.13	11.44	18.78	37.15	35.3	28.07	29.21
mmu-miR-137-3p-1-0--	91.38	63.81	trimmed	other	69.81	89.41	53.77	23.79	49.96	155.74	82.28	68.44
mmu-miR-137-3p-1-1-C	28.8	40.94	ambiguous tail	C	39.99	55.88	42.33	20.03	10.25	47.76	46.46	28.38
mmu-miR-137-3p-1-2-CT	5.64	3.12	ambiguous tail	other	5.82	3.19	4.58	0.1	1.28	3.11	1.94	12.52
mmu-miR-137-3p-2-0--	207.57	245.03	trimmed	other	193.42	282.6	193.34	235.4	201.1	277.23	320.41	144.39
mmu-miR-137-3p-3-0--	5.91	4.87	trimmed	other	2.91	2.39	2.29	1.25	2.56	13.5	15.49	1.67
mmu-miR-137-5p-0-0--	7.55	8.49	canonical	other	4.36	3.19	19.45	12.52	6.4	6.23	2.9	10.02
mmu-miR-137-5p-2-0--	2.03	1.66	trimmed	other	2.18	3.99	0.1	0.1	2.56	1.04	1.94	2.5
mmu-miR-138-1-3p-0-0--	11.41	15.29	canonical	other	12.36	23.95	17.16	7.51	3.84	18.69	15.49	11.68
mmu-miR-138-1-3p-0-1-A	7.48	8.11	NT tail	A	5.09	7.18	18.3	1.25	6.4	5.19	8.71	10.85
mmu-miR-138-1-3p-0-1-C	246.56	288.28	ambiguous tail	C	207.24	166.05	336.34	524.64	265.15	206.62	207.15	267.91
mmu-miR-138-2-3p-0-0--	14.73	26.68	canonical	other	28.36	24.75	33.18	20.03	10.25	15.57	27.1	18.36
mmu-miR-138-2-3p-0-1-A	3.64	1.72	NT tail	A	2.91	0.8	2.29	2.5	3.84	2.08	0.1	5.01
mmu-miR-138-2-3p-0-1-T	32.2	23.59	ambiguous tail	U	19.63	19.96	29.74	35.06	51.24	22.84	13.55	22.53
mmu-miR-138-2-3p-0-2-TG	9.75	3.18	ambiguous tail	other	2.91	4.79	2.29	0.1	12.81	7.27	5.81	9.18
mmu-miR-138-2-3p-0-2-TT	5.25	4.89	NT tail	UU	5.82	3.19	10.3	1.25	5.12	3.11	3.87	7.51
mmu-miR-138-5p-1-2-0-0--	3471.48	3119.76	canonical	other	2358.9	2881.07	2287.99	2033.45	2946.11	4664.03	6037.39	2804.29
mmu-miR-138-5p-1-2-0-1-A	52.41	0.1	NT tail	A	0.1	0.1	0.1	0.1	35.87	57.11	0.1	64.26
mmu-miR-138-5p-1-2-0-1-T	286.6	317.41	NT tail	U	339.58	421.5	304.3	191.57	335.6	247.11	330.09	277.09
mmu-miR-138-5p-1-2-0-2-AT	12.09	0.1	NT tail	AU	0.1	0.1	0.1	0.1	19.21	10.38	0.1	6.68
mmu-miR-138-5p-1-2-0-2-TT	75.41	85.54	NT tail	UU	119.98	118.15	96.1	23.79	90.95	72.68	69.7	62.6
mmu-miR-138-5p-1-2-0-3-TTT	18.01	23.68	NT tail	UUU	27.63	37.52	22.88	10.02	14.09	24.92	20.33	15.02
mmu-miR-138-5p-1-2-1-0--	288.46	290.63	trimmed	other	277.05	267.43	195.62	211.61	292.05	399.74	501.42	173.6
mmu-miR-138-5p-1-2-1-1-A	15.65	2.21	ambiguous tail	A	0.1	0.1	0.1	0.1	14.09	22.84	10.65	10.02
mmu-miR-138-5p-1-2-1-1-T	287.57	238.07	ambiguous tail	U	216.69	206.76	186.47	169.04	390.68	295.91	411.4	176.1
mmu-miR-138-5p-1-2-2-0--	1555.02	1870.9	trimmed	other	1702.28	1837.69	1915.05	1759.23	1751.02	1567.83	2140.24	1346.23
mmu-miR-138-5p-1-2-2-1-T	30.25	32.07	ambiguous tail	U	34.9	61.47	25.17	17.53	40.99	23.88	21.3	25.87
mmu-miR-138-5p-1-2-3-0--	233.78	276.48	trimmed	other	229.78	320.12	253.97	126.46	198.54	359.25	452.05	143.55
mmu-miR-138-5p-1-2-3-1-A	44.41	41.7	ambiguous tail	A	34.9	45.5	48.05	20.03	35.87	62.3	60.02	35.05
mmu-miR-138-5p-1-2-3-1-T	27.9	31.15	ambiguous tail	U	20.36	33.53	25.17	35.06	35.87	31.15	41.62	16.69
mmu-miR-139-3p-0-0--	67.22	53.27	canonical	other	26.18	38.32	67.5	101.42	93.51	28.03	32.91	80.12
mmu-miR-139-3p-0-1-A	19.12	10.7	NT tail	A	8.73	14.37	9.15	12.52	19.21	7.27	8.71	30.88
mmu-miR-139-3p-0-1-C	5.54	5.78	NT tail	C	2.91	5.59	4.58	10.02	6.4	1.04	5.81	9.18
mmu-miR-139-3p-0-1-T	535.4	629.43	ambiguous tail	U	399.21	473.39	745.89	1156.96	760.87	246.08	371.71	599.25
mmu-miR-139-3p-0-2-TT	30.76	32.86	NT tail	UU	21.09	27.94	33.18	58.85	25.62	20.77	23.23	45.9
mmu-miR-139-3p-1-0--	109.54	99.49	trimmed	other	58.17	96.59	104.1	164.03	178.05	61.26	74.54	89.3
mmu-miR-139-3p-1-1-A	54.6	42.65	ambiguous tail	A	25.45	30.34	38.9	100.17	80.7	32.19	18.39	50.91
mmu-miR-139-3p-1-1-T	143.23	160.19	ambiguous tail	U	88.71	103.78	188.76	254.18	210.07	60.22	165.53	159.41
mmu-miR-139-3p-1-2-AA	12.61	8.2	ambiguous tail	AA	13.09	5.59	12.58	8.76	21.78	5.19	0.97	10.85
mmu-miR-139-3p-1-2-AT	26.14	17.75	ambiguous tail	AU	19.63	21.55	21.74	20.03	37.15	10.38	5.81	30.88
mmu-miR-139-3p-1-2-TT	6.99	10.36	ambiguous tail	UU	8.73	3.99	11.44	23.79	6.4	6.23	3.87	8.35
mmu-miR-139-3p-2-0--	9.41	17.74	trimmed	other	15.27	20.76	11.44	23.79	12.81	6.23	17.42	9.18
mmu-miR-139-3p-2-1-T	4.77	13.45	ambiguous tail	U	3.64	7.98	17.16	28.8	6.4	2.08	9.68	5.84
mmu-miR-139-5p-0-0--	146.98	147.04	canonical	other	129.43	152.48	161.3	105.18	107.6	146.4	186.82	186.95
mmu-miR-139-5p-0-1-A	24.63	3.27	NT tail	A	5.09	4.79	0.1	6.26	32.02	13.5	0.1	28.38
mmu-miR-139-5p-0-1-T	1198.98	1350.62	ambiguous tail	U	1411.41	1660.46	1487.2	915.3	1246.33	1146.28	1278.72	1204.34
mmu-miR-139-5p-0-2-TA	9.1	3.2	NT tail	UA	8.73	3.19	0.1	0.1	8.97	8.31	3.87	10.02
mmu-miR-139-5p-0-2-TT	24.87	21.96	NT tail	UU	33.45	18.36	28.6	10.02	28.18	23.88	19.36	22.53
mmu-miR-139-5p-0-3-TAA	6.72	2.46	NT tail	UAA	3.64	0.1	3.43	5.01	6.4	2.08	0.1	11.68
mmu-miR-139-5p-1-0--	127.49	155.67	trimmed	other	167.97	184.41	210.5	75.13	110.16	128.75	140.36	143.55
mmu-miR-139-5p-1-1-A	3.15	0.1	ambiguous tail	A	0.1	0.1	0.1	0.1	3.84	3.11	0.1	2.5
mmu-miR-139-5p-1-1-T	12.76	13.69	ambiguous tail	U	18.91	15.97	10.3	8.76	15.37	6.23	14.52	16.69
mmu-miR-139-5p-1-2-TT	3.15	6.91	ambiguous tail	UU	2.91	9.58	13.73	2.5	3.84	3.11	5.81	2.5
mmu-miR-139-5p-2-0--	96.31	106.87	trimmed	other	101.07	127.73	128.13	65.11	84.54	105.91	112.29	98.48
mmu-miR-139-5p-2-1-T	5.6	4.29	ambiguous tail	U	2.18	7.18	5.72	2.5	6.4	6.23	3.87	4.17
mmu-miR-139-5p-3-0--	113.57	159.42	trimmed	other	102.53	143.69	149.86	159.02	75.57	143.28	242	121.85
mmu-miR-140-3p-0-0--	20.44	23.86	canonical	other	18.91	22.35	22.88	21.29	29.46	13.5	33.88	18.36
mmu-miR-140-3p-0-1-A	98.21	94.3	ambiguous tail	A	92.35	106.97	73.22	87.65	92.23	83.06	111.32	119.35
mmu-miR-140-3p-0-2-AA	94.53	75.48	NT tail	AA	85.08	97.39	46.9	76.38	65.33	83.06	71.63	135.21
mmu-miR-140-3p-0-2-AC	487.13	553.56	ambiguous tail	other	555.55	603.51	461.03	514.62	380.43	451.66	633.07	629.3
mmu-miR-140-3p-0-2-AT	9.61	9.51	NT tail	AU	8	15.17	2.29	16.28	2.56	6.23	5.81	20.03
mmu-miR-140-3p-0-3-AAA	7.49	1.84	NT tail	AAA	3.64	0.1	2.29	1.25	15.37	2.08	1.94	5.01
mmu-miR-140-3p-0-3-AAT	10.12	2.47	NT tail	AAU	1.45	5.59	2.29	0.1	7.69	13.5	2.9	9.18
mmu-miR-140-3p-0-3-ACA	16.78	10.73	ambiguous tail	other	19.63	7.98	12.58	3.76	14.09	10.38	9.68	25.87
mmu-miR-140-3p-0-3-ACT	150.79	168.55	NT tail	other	151.98	156.47	123.55	167.78	117.84	165.09	242.97	169.43
mmu-miR-140-3p-0-3-ATT	2.03	0.88	NT tail	AUU	0.1	1.6	0.1	2.5	2.56	1.04	0.1	2.5
mmu-miR-140-3p-1-0--	10.07	16.93	trimmed	other	10.18	35.92	4.58	17.53	8.97	10.38	16.46	10.85
mmu-miR-140-3p-2-1-C	6.82	4.62	ambiguous tail	C	3.64	5.59	4.58	2.5	10.25	1.04	6.78	9.18
mmu-miR-140-3p-2-2-CT	6.81	4.66	ambiguous tail	other	8	5.59	4.58	1.25	8.97	3.11	3.87	8.35
mmu-miR-140-5p-0-0--	76.46	63.4	canonical	other	82.9	85.42	46.9	26.29	44.83	111.1	75.5	73.45
mmu-miR-140-5p-0-1-T	19.76	12.66	NT tail	U	18.18	15.97	12.58	0.1	24.34	24.92	16.46	10.02
mmu-miR-140-5p-1-0--	7.71	10.54	trimmed	other	10.91	11.97	4.58	8.76	8.97	8.31	16.46	5.84
mmu-miR-140-5p-2-0--	7.3	6.99	trimmed	other	4.36	7.98	9.15	3.76	10.25	8.31	9.68	3.34
mmu-miR-140-5p-3-0--	10.84	4.16	trimmed	other	5.09	3.19	2.29	2.5	17.93	6.23	7.74	8.35
mmu-miR-142a-5p-0-0--	180.04	164.18	canonical	other	194.15	176.42	169.31	95.16	219.04	139.13	185.86	181.95
mmu-miR-142a-5p-1-0--	13.59	8.16	trimmed	other	13.82	14.37	5.72	0.1	15.37	10.38	6.78	15.02
mmu-miR-142a-5p-2-0--	12.62	13.89	trimmed	other	10.18	9.58	20.59	8.76	8.97	19.73	20.33	9.18
mmu-miR-142a-5p-3-0--	19.7	21.47	trimmed	other	13.82	18.36	14.87	22.54	8.97	30.11	37.75	20.03
mmu-miR-143-3p-0-0--	6932.81	6973.07	canonical	other	7166.87	8529.04	4046.32	5541.9	4179.64	7317.91	9581.22	9300.9
mmu-miR-143-3p-0-1-A	1249.94	951.36	NT tail	A	885.68	1177.49	688.69	747.52	798.01	1394.43	1257.43	1557.38
mmu-miR-143-3p-0-1-C	41.85	38.38	NT tail	C	45.81	49.49	32.03	20.03	24.34	39.46	44.53	61.76
mmu-miR-143-3p-0-1-G	46.23	39.89	NT tail	G	18.91	37.52	13.73	45.08	15.37	84.1	84.22	39.23
mmu-miR-143-3p-0-1-T	8930.17	9109.91	NT tail	U	8906.96	11313.5	6540.23	6403.36	5821.77	10078.7	12385.5	10890
mmu-miR-143-3p-0-2-AG	79.34	0.1	NT tail	other	0.1	0.1	0.1	0.1	75.57	104.87	0.1	57.59
mmu-miR-143-3p-0-2-AT	87.59	57.12	NT tail	AU	37.09	59.87	53.77	52.59	61.48	102.79	82.28	98.48
mmu-miR-143-3p-0-2-TA	68.92	2.26	NT tail	UA	10.91	0.1	0.1	0.1	34.58	82.03	0.1	90.14
mmu-miR-143-3p-0-2-TG	20.72	2.02	NT tail	other	0.1	0.1	0.1	0.1	12.81	21.8	9.68	27.54
mmu-miR-143-3p-0-2-TT	2503.75	2607.17	NT tail	UU	2550.87	3298.58	1830.4	2103.57	1890.64	2937.34	3252.47	2683.27
mmu-miR-143-3p-0-3-TTA	34.77	0.1	NT tail	UUA	0.1	0.1	0.1	0.1	25.62	39.46	0.1	39.23
mmu-miR-143-3p-0-3-TTT	111.9	108	NT tail	UUU	95.26	116.55	92.66	73.88	99.91	129.79	161.66	106
mmu-miR-143-3p-1-0--	67597.6	62783.3	trimmed	other	53654.1	63685.2	36289.9	44389	52010.4	86302.1	115898	64480.3
mmu-miR-143-3p-1-1-A	99.32	50.83	ambiguous tail	A	42.18	67.06	21.74	43.82	67.89	104.87	79.38	125.19
mmu-miR-143-3p-1-1-G	42.87	11.98	ambiguous tail	G	14.54	15.17	0.1	0.1	32.02	45.69	30.01	50.91
mmu-miR-143-3p-1-1-T	1655.87	1623.4	ambiguous tail	U	1505.94	1987.77	1012.44	1187.01	1002.96	2128.51	2423.86	1836.14
mmu-miR-143-3p-1-2-AT	25.93	7.19	ambiguous tail	AU	11.63	9.58	0.1	0.1	24.34	34.26	14.52	19.2
mmu-miR-143-3p-1-2-TT	121.58	106.19	ambiguous tail	UU	93.08	127.73	86.94	96.41	80.7	116.29	126.81	167.76
mmu-miR-143-3p-1-3-ATT	23.45	12.52	ambiguous tail	AUU	17.45	19.96	0.1	12.52	17.93	33.23	12.58	19.2
mmu-miR-143-3p-1-3-TTA	14	0.1	ambiguous tail	UUA	0.1	0.1	0.1	0.1	14.09	10.38	0.1	17.53
mmu-miR-143-3p-1-3-TTT	145.63	119.43	ambiguous tail	UUU	111.26	142.1	70.93	76.38	147.31	136.02	196.5	153.57
mmu-miR-143-3p-2-0--	7009.87	6325.15	trimmed	other	4876.32	5784.48	3477.75	3427.06	5798.72	9666.54	14060.1	5564.35
mmu-miR-143-3p-2-1-A	71.85	51.62	ambiguous tail	A	53.08	51.89	34.32	28.8	37.15	88.26	90.02	90.14
mmu-miR-143-3p-2-1-G	499.02	496.45	ambiguous tail	G	181.79	343.27	130.42	414.45	260.03	1060.1	1412.31	176.94
mmu-miR-143-3p-3-0--	774	834.2	trimmed	other	612.27	784.73	454.17	706.2	457.29	1226.23	1613.65	638.48
mmu-miR-143-3p-3-1-A	129.22	99.07	ambiguous tail	A	66.9	98.19	50.34	98.92	78.14	199.35	181.02	110.17
mmu-miR-143-3p-3-1-T	67.26	67.72	ambiguous tail	U	47.99	78.23	36.61	66.36	47.39	89.29	109.38	65.1
mmu-miR-143-3p-3-2-AA	24.96	11.44	ambiguous tail	AA	10.18	25.55	0.1	0.1	23.06	25.96	21.3	25.87
mmu-miR-143-3p-3-2-AT	14.54	10.23	ambiguous tail	AU	0.1	10.38	0.1	12.52	14.09	18.69	28.07	10.85
mmu-miR-143-3p-3-4-TTCT	23.08	30.47	ambiguous tail	other	16	36.72	28.6	18.78	14.09	30.11	52.27	25.04
mmu-miR-143-3p-5-4-GGCT	14.68	12.22	ambiguous tail	other	12.36	17.56	0.1	0.1	12.81	14.54	30.98	16.69
mmu-miR-143-3p-8-7-AGTAGCT	16.75	11.8	ambiguous tail	other	17.45	23.95	0.1	0.1	19.21	13.5	17.42	17.53
mmu-miR-143-5p-0-1-A	3.57	2.37	NT tail	A	0.73	2.39	5.72	0.1	3.84	1.04	2.9	5.84
mmu-miR-143-5p-0-3-TCT	6.62	7.23	NT tail	other	9.45	4.79	8.01	10.02	2.56	3.11	3.87	14.19
mmu-miR-144-3p-0-0--	7.01	15.05	canonical	other	19.63	3.99	21.74	3.76	8.97	6.23	26.14	5.84
mmu-miR-144-3p-1-0--	19.76	20.65	trimmed	other	9.45	12.77	28.6	5.01	15.37	23.88	47.43	20.03
mmu-miR-144-3p-2-0--	18.21	21.66	trimmed	other	13.09	23.95	16.02	8.76	14.09	32.19	46.46	8.35
mmu-miR-144-5p-0-0--	23.26	29.44	canonical	other	24.72	28.74	52.62	6.26	12.81	43.61	34.85	13.35
mmu-miR-144-5p-1-0--	15.48	18.82	trimmed	other	10.91	15.97	28.6	3.76	2.56	28.03	34.85	15.86
mmu-miR-145a-3p-1-0--	85.01	80.14	trimmed	other	95.26	77.44	40.04	98.92	44.83	110.06	89.06	100.15
mmu-miR-145a-3p-2-0--	32.58	11.66	trimmed	other	9.45	11.18	9.15	6.26	14.09	47.76	22.26	35.89
mmu-miR-145a-3p-2-1-A	11.2	0.54	ambiguous tail	A	1.45	0.1	0.1	0.1	12.81	12.46	0.97	8.35
mmu-miR-145a-3p-2-1-C	16.55	14.53	ambiguous tail	C	17.45	14.37	2.29	16.28	14.09	23.88	22.26	11.68
mmu-miR-145a-3p-2-1-G	7.88	0.23	ambiguous tail	G	0.73	0.1	0.1	0.1	5.12	9.34	0.1	9.18
mmu-miR-145a-3p-3-0--	14.94	3.65	trimmed	other	5.09	3.99	2.29	0.1	11.53	20.77	6.78	12.52
mmu-miR-146b-3p-0-0--	6.91	6.14	canonical	other	6.54	5.59	3.43	11.27	12.81	2.08	3.87	5.84
mmu-miR-147-5p-2-0--	9.46	3.42	trimmed	other	0.1	2.39	5.72	5.01	19.21	4.15	3.87	5.01
mmu-miR-148a-3p-0-0--	12002.5	12040.6	canonical	other	11886.9	12883	9445.99	10124.7	7338.38	15411.4	15862.5	13257.8
mmu-miR-148a-3p-0-1-C	8350.29	8352.16	NT tail	C	7543.54	8818.82	7300.99	6589.93	5774.38	11139.9	11507.5	8136.61
mmu-miR-148a-3p-0-1-T	111.99	144.64	NT tail	U	151.98	150.08	116.69	108.93	60.2	146.4	195.54	129.36
mmu-miR-148a-3p-0-2-CA	22.12	5.68	NT tail	other	11.63	0.1	0.1	0.1	15.37	25.96	16.46	25.04
mmu-miR-148a-3p-0-2-CC	27.53	21.37	NT tail	other	13.09	27.94	21.74	15.03	23.06	27	29.04	32.55
mmu-miR-148a-3p-0-2-CT	447.83	446	NT tail	other	456.66	496.54	356.93	431.98	307.42	499.42	487.87	536.65
mmu-miR-148a-3p-0-2-TA	29.43	17.63	NT tail	UA	18.18	19.96	21.74	13.77	25.62	30.11	14.52	32.55
mmu-miR-148a-3p-0-2-TT	384.99	331.94	NT tail	UU	299.59	405.54	250.54	282.98	248.5	459.97	421.08	446.52
mmu-miR-148a-3p-1-0--	400.3	330.79	trimmed	other	266.14	281	187.62	348.09	239.53	633.36	571.12	328
mmu-miR-148a-3p-1-1-C	26.92	10.45	ambiguous tail	C	16	21.55	0.1	0.1	16.65	33.23	14.52	30.88
mmu-miR-148a-3p-3-0--	34.51	15.12	trimmed	other	0.1	9.58	12.58	0.1	14.09	60.22	53.24	29.21
mmu-miR-148a-5p-0-0--	404.51	428.99	canonical	other	445.02	489.36	435.86	398.18	453.45	313.57	376.55	446.52
mmu-miR-148a-5p-1-0--	4.02	5.94	trimmed	other	5.09	5.59	5.72	7.51	7.69	1.04	5.81	3.34
mmu-miR-148b-3p-0-0--	3012.75	1901.12	canonical	other	2064.4	2281.54	1833.83	1108.13	3745.4	2670.5	2217.68	2622.34
mmu-miR-148b-3p-0-1-A	61.28	19.4	NT tail	A	26.18	19.16	13.73	26.29	53.8	75.8	11.62	54.25
mmu-miR-148b-3p-0-1-C	77.02	87	ambiguous tail	C	71.26	90.21	104.1	93.91	61.48	98.64	75.5	70.94
mmu-miR-148b-3p-0-1-T	1534.86	1049.65	NT tail	U	1165.63	1244.55	1049.05	738.75	1881.67	1354.98	1050.28	1367.93
mmu-miR-148b-3p-0-2-TA	129.93	85.45	NT tail	UA	82.9	108.57	107.54	78.88	126.81	157.82	49.37	105.16
mmu-miR-148b-3p-0-2-TC	11.92	12.81	NT tail	other	11.63	13.57	19.45	8.76	14.09	8.31	10.65	13.35
mmu-miR-148b-3p-0-2-TT	2492.42	2607.62	NT tail	UU	2662.12	3018.37	3131.12	2330.2	2114.8	2991.33	1896.3	2371.13
mmu-miR-148b-3p-0-3-TTT	171.97	197.14	NT tail	UUU	186.88	197.98	212.78	255.43	130.65	198.31	132.62	186.95
mmu-miR-148b-3p-1-0--	112.1	82.36	trimmed	other	85.8	81.43	80.08	55.09	124.25	115.25	109.38	96.81
mmu-miR-148b-3p-3-0--	25.82	18.88	trimmed	other	18.18	14.37	19.45	16.28	29.46	40.49	26.14	7.51
mmu-miR-148b-5p-0-0--	57.04	79.65	canonical	other	95.98	75.04	82.37	83.89	47.39	47.76	60.98	75.95
mmu-miR-148b-5p-1-0--	32.82	37.66	trimmed	other	40.72	35.92	32.03	43.82	33.3	30.11	35.82	35.05
mmu-miR-149-5p-0-0--	801.46	822.23	canonical	other	904.58	966.74	967.82	857.7	1068.29	373.79	414.3	962.31
mmu-miR-149-5p-0-1-A	13.87	2.2	NT tail	A	2.18	3.19	4.58	0.1	23.06	5.19	0.97	13.35
mmu-miR-149-5p-0-1-G	9.36	5.08	ambiguous tail	G	0.1	5.59	4.58	11.27	16.65	7.27	3.87	4.17
mmu-miR-149-5p-0-1-T	321.99	387.76	NT tail	U	325.04	280.2	502.21	707.45	505.96	102.79	123.9	357.21
mmu-miR-149-5p-1-0--	217.46	224.68	trimmed	other	248.69	247.47	275.7	205.35	331.76	102.79	146.17	217.83
mmu-miR-149-5p-2-0--	203.03	239.33	trimmed	other	233.42	217.14	288.29	315.54	248.5	119.4	142.3	241.2
mmu-miR-149-5p-3-0--	20.86	24.54	trimmed	other	42.9	28.74	32.03	11.27	20.49	14.54	7.74	27.54
mmu-miR-150-3p-1-0--	3.01	2.66	trimmed	other	1.45	3.99	3.43	2.5	2.56	3.11	1.94	3.34
mmu-miR-150-3p-2-1-T	1.05	5.99	ambiguous tail	U	6.54	6.39	6.86	6.26	1.28	1.04	3.87	0.83
mmu-miR-151-3p-0-0--	14905.3	14327.5	canonical	other	11939.2	11435.6	16575.4	18735.5	12897.6	14497.7	12951.8	17320.7
mmu-miR-151-3p-0-1-A	10234.8	7325.86	NT tail	A	6767.66	6589.17	8509.05	6640.01	10319.1	9755.83	8123.42	10629.6
mmu-miR-151-3p-0-1-G	26.11	20.38	NT tail	G	14.54	14.37	11.44	23.79	12.81	40.49	37.75	25.04
mmu-miR-151-3p-0-1-T	5437.2	5769.69	NT tail	U	5115.56	4875.22	6714.12	6467.22	4412.76	5448.98	5676.33	6449.87
mmu-miR-151-3p-0-2-AA	2091.04	1275.36	NT tail	AA	1070.38	1099.26	1529.52	1536.36	1455.12	2007.03	1141.27	2810.97
mmu-miR-151-3p-0-2-AC	290.16	282.82	NT tail	other	234.14	236.3	380.95	325.55	180.61	291.76	237.16	398.11
mmu-miR-151-3p-0-2-AT	2182.21	1546.66	NT tail	AU	1491.4	1344.34	1730.87	1298.45	2409.41	1995.61	1868.23	2141.61
mmu-miR-151-3p-0-2-TA	175.07	107.38	NT tail	UA	93.08	90.21	109.82	140.24	146.02	158.86	103.58	220.34
mmu-miR-151-3p-0-2-TT	913.19	1062.48	NT tail	UU	975.85	959.56	1344.2	1100.62	637.9	979.11	932.18	1122.55
mmu-miR-151-3p-0-3-AAA	358.82	140.77	NT tail	AAA	138.89	150.08	157.87	172.79	338.16	287.61	84.22	450.69
mmu-miR-151-3p-0-3-AAT	308.13	170.89	NT tail	AAU	172.34	137.31	193.34	217.87	260.03	259.57	133.58	404.79
mmu-miR-151-3p-0-3-ACC	88.23	68.84	NT tail	other	56.72	49.49	84.66	61.35	78.14	83.06	91.96	103.49
mmu-miR-151-3p-0-3-ACT	587.41	485.83	NT tail	other	452.29	451.84	570.85	523.39	520.05	554.45	430.76	687.72
mmu-miR-151-3p-0-3-AGA	28.46	0.1	NT tail	other	0.1	0.1	0.1	0.1	17.93	33.23	0.1	34.22
mmu-miR-151-3p-0-3-ATA	17.75	8.92	NT tail	AUA	0.1	8.78	20.59	15.03	15.37	18.69	0.1	19.2
mmu-miR-151-3p-0-3-ATT	410.9	323.18	NT tail	AUU	330.13	288.19	318.03	303.01	476.5	340.56	376.55	415.64
mmu-miR-151-3p-0-3-TAA	24.92	1.53	NT tail	UAA	7.27	0.1	0.1	0.1	16.65	19.73	0.1	38.39
mmu-miR-151-3p-0-3-TAT	89.8	50.45	NT tail	UAU	45.81	55.88	53.77	63.86	46.11	83.06	32.91	140.21
mmu-miR-151-3p-0-3-TTT	156.73	196.18	NT tail	UUU	215.97	186	211.64	206.6	119.13	151.59	160.69	199.47
mmu-miR-151-3p-1-0--	4137.17	3378.35	trimmed	other	2782.83	2904.22	3979.97	4332.35	4234.72	3506.33	2892.37	4670.48
mmu-miR-151-3p-1-1-A	3847.42	2326.39	ambiguous tail	A	2429.43	2559.35	1513.51	2193.72	4054.11	3569.66	2935.93	3918.49
mmu-miR-151-3p-1-1-T	791.81	909.8	ambiguous tail	U	772.24	793.51	1165.73	1039.26	586.66	830.64	778.27	958.13
mmu-miR-151-3p-1-2-AA	591.1	303.91	ambiguous tail	AA	312.68	277.81	353.5	254.18	623.81	558.6	321.37	590.9
mmu-miR-151-3p-1-2-AT	100.2	68.22	ambiguous tail	AU	73.44	68.65	86.94	50.08	102.47	103.83	61.95	94.31
mmu-miR-151-3p-1-2-TA	37.53	26.99	ambiguous tail	UA	23.27	25.55	40.04	32.56	14.09	38.42	13.55	60.09
mmu-miR-151-3p-1-2-TT	160.15	195.5	ambiguous tail	UU	198.51	135.71	266.55	192.83	143.46	173.4	183.92	163.58
mmu-miR-151-3p-1-3-AAA	171.17	87.98	ambiguous tail	AAA	96.71	85.42	84.66	67.61	131.93	183.78	105.51	197.8
mmu-miR-151-3p-1-3-AAT	56.24	26.65	ambiguous tail	AAU	24.72	23.15	30.89	22.54	52.52	47.76	31.94	68.44
mmu-miR-151-3p-1-3-TAA	27.56	8.56	ambiguous tail	UAA	18.18	0.1	0.1	13.77	16.65	25.96	10.65	40.06
mmu-miR-151-3p-1-3-TAT	15.61	5.59	ambiguous tail	UAU	0.1	0.1	16.02	0.1	15.37	11.42	11.62	20.03
mmu-miR-151-3p-2-0--	1643.78	1322.29	trimmed	other	1289.25	1306.02	1408.26	1600.21	1488.43	1498.26	1007.68	1944.64
mmu-miR-151-3p-2-1-A	414.36	210.92	ambiguous tail	A	231.24	233.1	217.36	244.16	343.29	374.82	128.74	524.97
mmu-miR-151-3p-2-1-T	71.29	66.35	ambiguous tail	U	77.08	75.04	43.47	83.89	74.29	43.61	52.27	95.98
mmu-miR-151-3p-2-2-AA	566.54	345.87	ambiguous tail	AA	316.31	367.22	364.94	406.94	494.43	519.15	273.94	686.05
mmu-miR-151-3p-2-2-AT	48.12	26.18	ambiguous tail	AU	18.91	35.92	25.17	23.79	30.74	64.37	27.1	49.24
mmu-miR-151-3p-2-2-TT	42.81	38.2	ambiguous tail	UU	39.27	33.53	41.18	45.08	24.34	49.84	31.94	54.25
mmu-miR-151-3p-2-3-AAA	63.86	33.47	ambiguous tail	AAA	24	40.71	43.47	38.82	76.86	48.8	20.33	65.93
mmu-miR-151-3p-2-3-AAT	17.46	0.1	ambiguous tail	AAU	0.1	0.1	0.1	0.1	21.78	15.57	0.1	15.02
mmu-miR-151-3p-3-1-T	35.48	45.36	ambiguous tail	U	58.9	32.73	50.34	53.84	34.58	30.11	30.98	41.73
mmu-miR-151-5p-0-0--	24382.2	22618	canonical	other	20795.3	21278.7	24936.9	25380.5	27179.8	22479.1	20698.7	23487.6
mmu-miR-151-5p-0-1-A	2074.94	2114.14	NT tail	A	1907.34	1937.47	2336.04	2631.96	2039.22	1914.62	1757.88	2270.97
mmu-miR-151-5p-0-1-T	75.24	81.89	NT tail	U	72.72	73.44	96.1	92.66	93.51	57.11	74.54	75.11
mmu-miR-151-5p-0-2-AA	138.73	108.08	NT tail	AA	124.34	98.99	139.57	82.64	133.22	123.56	94.86	159.41
mmu-miR-151-5p-0-2-AC	30.95	11.58	NT tail	other	8.73	10.38	12.58	0.1	44.83	36.34	26.14	11.68
mmu-miR-151-5p-0-2-AT	124.19	89.37	NT tail	AU	121.44	92.6	102.96	47.58	151.15	124.6	82.28	96.81
mmu-miR-151-5p-0-3-ATT	48.56	61.68	NT tail	AUU	43.63	69.45	66.35	86.4	73.01	34.26	42.59	38.39
mmu-miR-151-5p-1-0--	897.72	892.5	trimmed	other	703.89	770.36	920.92	1048.03	792.89	1075.67	1019.3	824.59
mmu-miR-151-5p-1-1-A	60.44	39.9	ambiguous tail	A	14.54	41.51	69.78	38.82	58.92	58.14	34.85	64.26
mmu-miR-151-5p-1-1-G	29.63	34.72	ambiguous tail	G	21.09	29.54	22.88	40.07	20.49	50.88	60.02	17.53
mmu-miR-151-5p-3-0--	166.18	214.69	trimmed	other	167.97	183.61	281.42	230.39	139.62	212.85	210.06	146.06
mmu-miR-152-3p-0-0--	27.63	37.78	canonical	other	53.81	47.9	12.58	8.76	12.81	46.72	65.82	23.37
mmu-miR-152-3p-0-1-A	10.61	6.43	NT tail	A	10.18	10.38	2.29	2.5	8.97	18.69	6.78	4.17
mmu-miR-152-3p-0-1-C	2.37	1.02	NT tail	C	0.73	3.19	0.1	0.1	1.28	4.15	0.97	1.67
mmu-miR-152-3p-0-1-G	9.6	5.52	ambiguous tail	G	2.18	4.79	3.43	7.51	12.81	13.5	9.68	2.5
mmu-miR-152-3p-0-1-T	21.98	22.34	NT tail	U	18.18	14.37	11.44	12.52	8.97	43.61	55.18	13.35
mmu-miR-152-3p-0-2-GA	6.63	5.78	NT tail	other	2.18	4.79	9.15	5.01	5.12	11.42	7.74	3.34
mmu-miR-152-3p-0-2-GT	6.21	4.67	NT tail	other	4.36	7.98	1.14	5.01	3.84	3.11	4.84	11.68
mmu-miR-152-3p-0-2-TA	65.76	33.87	NT tail	UA	19.63	35.13	19.45	22.54	35.87	103.83	72.6	57.59
mmu-miR-152-3p-0-2-TT	20.66	19.87	NT tail	UU	18.18	15.97	16.02	16.28	7.69	34.26	32.91	20.03
mmu-miR-152-3p-0-3-GAA	4.07	3.21	NT tail	other	2.18	0.1	1.14	8.76	5.12	2.08	3.87	5.01
mmu-miR-152-3p-0-3-TAA	1.68	0.1	NT tail	UAA	0.1	0.1	0.1	0.1	1.28	2.08	0.1	1.67
mmu-miR-152-3p-3-0--	8.07	4.38	trimmed	other	2.91	5.59	0.1	7.51	3.84	18.69	5.81	1.67
mmu-miR-152-5p-0-0--	86.35	82.54	canonical	other	106.17	87.01	110.97	47.58	106.32	42.57	60.98	110.17
mmu-miR-153-3p-0-0--	2337.07	2021.88	canonical	other	1719	2388.51	1415.12	2010.91	3513.56	1785.87	2575.84	1711.79
mmu-miR-153-3p-0-1-A	9.49	6.24	ambiguous tail	A	10.18	3.99	0.1	6.26	15.37	7.27	10.65	5.84
mmu-miR-153-3p-0-2-AT	32.23	19.17	ambiguous tail	AU	21.09	20.76	6.86	20.03	70.45	10.38	27.1	15.86
mmu-miR-153-3p-1-0--	62.54	60.14	trimmed	other	42.9	79.83	52.62	57.6	85.82	50.88	67.76	50.91
mmu-miR-153-3p-1-1-A	45.46	32.18	ambiguous tail	A	39.99	38.32	17.16	23.79	76.86	31.15	41.62	28.38
mmu-miR-153-3p-1-1-G	27.1	24.33	ambiguous tail	G	25.45	24.75	9.15	10.02	23.06	37.38	52.27	20.87
mmu-miR-153-3p-1-1-T	10.99	6.43	ambiguous tail	U	0.1	8.78	0.1	12.52	20.49	8.31	10.65	4.17
mmu-miR-153-3p-2-0--	5.45	8.33	trimmed	other	6.54	19.16	4.58	7.51	5.12	6.23	3.87	5.01
mmu-miR-153-5p-0-0--	5.18	3.47	canonical	other	4.36	3.99	4.58	2.5	5.12	6.23	1.94	4.17
mmu-miR-153-5p-0-1-T	3.04	2.77	NT tail	U	0.73	7.98	1.14	0.1	6.4	1.04	3.87	1.67
mmu-miR-154-3p-0-0--	10.68	12.77	canonical	other	16	23.15	10.3	3.76	7.69	13.5	10.65	10.85
mmu-miR-154-5p-0-0--	120.86	122.18	canonical	other	127.25	164.45	161.3	38.82	116.56	126.67	119.06	119.35
mmu-miR-154-5p-0-1-A	2.33	0.66	NT tail	A	2.91	0.1	0.1	0.1	5.12	1.04	0.1	0.83
mmu-miR-154-5p-0-1-T	16.72	9.02	NT tail	U	10.18	11.97	11.44	3.76	25.62	14.54	7.74	10.02
mmu-miR-154-5p-1-0--	2.86	5.1	trimmed	other	5.82	5.59	9.15	0.1	2.56	5.19	4.84	0.83
mmu-miR-154-5p-3-0--	12.63	7.96	trimmed	other	12.36	12.77	2.29	7.51	16.65	6.23	4.84	15.02
mmu-miR-15a-3p-1-1-T	3.17	1.76	ambiguous tail	U	4.36	0.8	3.43	0.1	5.12	1.04	0.1	3.34
mmu-miR-15a-3p-2-0--	28.09	39.24	trimmed	other	33.45	33.53	46.9	30.05	39.71	18.69	52.27	25.87
mmu-miR-15a-5p-0-0--	28.63	34.49	canonical	other	30.54	31.13	28.6	25.04	14.09	38.42	57.11	33.38
mmu-miR-15a-5p-0-1-A	3.49	1.95	NT tail	A	2.91	0.1	2.29	2.5	2.56	6.23	1.94	1.67
mmu-miR-15a-5p-0-1-G	8.56	4.04	NT tail	G	5.09	5.59	3.43	1.25	2.56	11.42	4.84	11.68
mmu-miR-15a-5p-0-1-T	3.13	4.46	NT tail	U	5.82	0.8	5.72	1.25	1.28	3.11	8.71	5.01
mmu-miR-15a-5p-0-2-GA	2.52	0.52	NT tail	other	2.18	0.1	0.1	0.1	2.56	4.15	0.1	0.83
mmu-miR-15a-5p-1-0--	280.38	285.47	trimmed	other	295.23	292.18	165.88	240.41	194.7	431.93	433.66	214.49
mmu-miR-15a-5p-1-1-A	36.53	9.53	ambiguous tail	A	7.27	9.58	10.3	5.01	23.06	58.14	15.49	28.38
mmu-miR-15a-5p-1-1-T	4.19	7.19	ambiguous tail	U	6.54	12.77	0.1	0.1	3.84	6.23	16.46	2.5
mmu-miR-15a-5p-2-0--	97.32	93.7	trimmed	other	82.17	76.64	59.49	78.88	44.83	200.39	171.34	46.74
mmu-miR-15b-3p-0-0--	3.3	3.03	canonical	other	8.73	0.8	4.58	0.1	5.12	3.11	0.97	1.67
mmu-miR-15b-3p-3-0--	2.99	3.38	trimmed	other	2.91	7.18	4.58	1.25	1.28	5.19	0.97	2.5
mmu-miR-15b-5p-0-0--	514.97	326.82	canonical	other	377.39	288.19	312.31	349.34	650.71	363.4	306.85	530.81
mmu-miR-15b-5p-1-0--	16.57	22.41	trimmed	other	18.91	18.36	29.74	15.03	6.4	20.77	30.01	22.53
mmu-miR-15b-5p-2-0--	4.76	4.7	trimmed	other	6.54	7.98	1.14	0.1	3.84	2.08	7.74	8.35
mmu-miR-15b-5p-3-0--	5.61	6.63	trimmed	other	2.18	7.18	12.58	2.5	6.4	2.08	8.71	8.35
mmu-miR-16-1-3p-2-0--	5.35	4.31	trimmed	other	3.64	3.19	5.72	1.25	8.97	2.08	7.74	5.01
mmu-miR-16-2-3p-1-0--	11.12	6.87	trimmed	other	7.27	3.19	11.44	3.76	10.25	11.42	8.71	11.68
mmu-miR-16-5p-1-2-0-0--	29132.1	27445.3	canonical	other	19085	17706.3	14772.4	30176.2	18631	47531.1	55486.5	21234.2
mmu-miR-16-5p-1-2-0-1-T	221.41	237.77	NT tail	U	275.59	190.79	189.9	184.06	157.55	289.68	348.48	217
mmu-miR-16-5p-1-2-0-2-TT	21.8	23.81	NT tail	UU	31.99	26.34	12.58	20.03	26.9	21.8	28.07	16.69
mmu-miR-16-5p-1-2-1-0--	7854.95	6535.06	trimmed	other	4431.3	3837.43	2815.38	6194.25	5997.26	13417.9	15396.9	4149.68
mmu-miR-16-5p-1-2-1-1-A	67.78	74.65	ambiguous tail	A	65.44	63.07	48.05	77.63	38.43	113.17	119.06	51.75
mmu-miR-16-5p-1-2-2-0--	35.3	35.03	trimmed	other	23.27	25.55	0.1	18.78	12.81	83.06	107.45	10.02
mmu-miR-17-3p-0-0--	2.59	0.54	canonical	other	0.1	0.1	1.14	1.25	2.56	1.04	0.1	4.17
mmu-miR-17-3p-0-1-C	2.68	3.46	ambiguous tail	C	0.1	5.59	4.58	1.25	5.12	2.08	5.81	0.83
mmu-miR-17-3p-0-1-T	3.49	4.34	NT tail	U	1.45	5.59	2.29	7.51	2.56	2.08	4.84	5.84
mmu-miR-17-3p-0-2-CT	2.79	9.98	NT tail	other	11.63	11.97	1.14	21.29	1.28	2.08	3.87	5.01
mmu-miR-17-3p-1-0--	17.4	18.5	trimmed	other	8.73	15.17	25.17	25.04	23.06	12.46	18.39	16.69
mmu-miR-17-3p-2-0--	3.41	5.95	trimmed	other	4.36	5.59	14.87	0.1	1.28	3.11	4.84	5.84
mmu-miR-17-5p-0-0--	61.89	63.16	canonical	other	91.62	85.42	50.34	31.3	53.8	85.14	57.11	46.74
mmu-miR-17-5p-0-1-A	3.64	0.54	NT tail	A	0.73	0.8	0.1	0.1	3.84	2.08	0.97	5.01
mmu-miR-17-5p-0-1-T	18.84	28.75	ambiguous tail	U	37.09	25.55	30.89	3.76	21.78	19.73	46.46	15.02
mmu-miR-17-5p-1-1-T	3.21	4.13	ambiguous tail	U	2.91	2.39	8.01	2.5	2.56	6.23	4.84	0.83
mmu-miR-17-5p-1-2-TT	1.74	3.75	ambiguous tail	UU	5.82	8.78	1.14	0.1	1.28	3.11	2.9	0.83
mmu-miR-17-5p-2-0--	7.32	14.7	trimmed	other	21.09	11.97	17.16	8.76	3.84	7.27	14.52	10.85
mmu-miR-181a-2-3p-0-0--	337.26	245.88	canonical	other	266.87	202.77	234.52	399.43	394.52	202.47	125.84	414.8
mmu-miR-181a-2-3p-0-1-T	101.92	59.98	ambiguous tail	U	73.44	61.47	51.48	86.4	144.74	55.03	27.1	106
mmu-miR-181a-2-3p-0-2-AA	7.17	0.84	NT tail	AA	2.91	0.1	0.1	0.1	10.25	2.08	0.97	9.18
mmu-miR-181a-2-3p-0-2-TA	3.43	0.1	NT tail	UA	0.1	0.1	0.1	0.1	3.84	3.11	0.1	3.34
mmu-miR-181a-2-3p-0-2-TT	12.62	12.09	ambiguous tail	UU	10.18	3.99	9.15	31.3	14.09	6.23	5.81	17.53
mmu-miR-181a-2-3p-1-0--	351.97	289.81	trimmed	other	292.32	250.67	312.31	428.23	444.48	245.04	165.53	366.39
mmu-miR-181a-2-3p-1-1-A	12.6	10.32	ambiguous tail	A	6.54	7.98	19.45	13.77	12.81	8.31	3.87	16.69
mmu-miR-181a-2-3p-1-1-T	81.48	65.42	ambiguous tail	U	61.08	62.27	109.82	72.62	105.04	38.42	21.3	100.99
mmu-miR-181a-2-3p-1-2-AA	5.79	4.6	ambiguous tail	AA	2.91	8.78	0.1	2.5	3.84	5.19	8.71	8.35
mmu-miR-181a-2-3p-1-2-TA	3.77	0.1	ambiguous tail	UA	0.1	0.1	0.1	0.1	2.56	2.08	0.1	6.68
mmu-miR-181a-2-3p-2-0--	70.89	64.53	trimmed	other	50.9	52.69	45.76	72.62	35.87	114.21	100.67	62.6
mmu-miR-181a-2-3p-2-1-A	175.92	152.49	ambiguous tail	A	134.52	172.43	191.05	171.54	139.62	161.97	92.93	226.18
mmu-miR-181a-2-3p-2-1-T	8.54	4.09	ambiguous tail	U	2.18	7.98	3.43	0.1	8.97	8.31	6.78	8.35
mmu-miR-181a-2-3p-2-2-AA	8.15	6.12	ambiguous tail	AA	8.73	4.79	9.15	5.01	5.12	13.5	2.9	5.84
mmu-miR-181a-2-3p-3-0--	212.96	185.79	trimmed	other	179.61	198.78	229.94	171.54	190.86	207.66	149.07	240.37
mmu-miR-181a-5p-1-2-0-0--	556044	558920	canonical	other	442840	479387	545450	618074	461776	642526	708851	563829
mmu-miR-181a-5p-1-2-0-1-A	88.25	76.72	NT tail	A	63.99	51.89	108.68	95.16	73.01	88.26	63.89	103.49
mmu-miR-181a-5p-1-2-0-1-G	28.36	27.38	NT tail	G	19.63	20.76	13.73	36.31	33.3	38.42	46.46	13.35
mmu-miR-181a-5p-1-2-0-1-T	14082.1	14170.8	NT tail	U	12387.1	13547.1	14039.1	14970.4	12713.1	15374	15910	14159.2
mmu-miR-181a-5p-1-2-0-2-TA	17.38	4.96	NT tail	UA	10.91	13.57	0.1	0.1	20.49	16.61	0.1	15.02
mmu-miR-181a-5p-1-2-0-2-TT	1533.62	1669.82	NT tail	UU	1596.11	1758.66	1623.33	1516.32	1442.31	1618.7	1854.68	1539.86
mmu-miR-181a-5p-1-2-0-3-TGT	23.55	12.5	NT tail	other	19.63	22.35	0.1	0.1	26.9	14.54	20.33	29.21
mmu-miR-181a-5p-1-2-0-3-TTT	144.59	177.27	NT tail	UUU	201.42	183.61	192.19	146.5	133.22	153.67	162.62	146.89
mmu-miR-181a-5p-1-2-1-0--	80856.2	86334.6	trimmed	other	65186.1	72556.7	83496.9	103046	64042.1	93172.6	107388	85353.9
mmu-miR-181a-5p-1-2-1-1-A	4779.95	4361.12	ambiguous tail	A	3883.02	4163.93	3021.3	5252.66	3101.1	5474.94	5484.66	5763.82
mmu-miR-181a-5p-1-2-1-1-C	239.76	167.46	ambiguous tail	C	107.62	126.13	124.7	113.94	93.51	475.54	364.93	150.23
mmu-miR-181a-5p-1-2-1-1-G	1094.38	1244.21	ambiguous tail	G	605.72	890.1	767.62	1789.28	721.16	1930.19	2168.31	631.8
mmu-miR-181a-5p-1-2-1-2-AA	144.46	139.91	ambiguous tail	AA	106.89	153.27	215.07	113.94	108.88	118.37	110.35	206.15
mmu-miR-181a-5p-1-2-10-10-ATCGGTGAGT	48.41	44.69	ambiguous tail	other	47.27	35.92	44.62	37.56	23.06	65.41	58.08	56.75
mmu-miR-181a-5p-1-2-10-10-CTCGGTGAGT	49.62	42.66	ambiguous tail	other	42.9	38.32	34.32	42.57	37.15	67.49	55.18	44.23
mmu-miR-181a-5p-1-2-10-10-TTCGGTGAGT	68.16	56.23	ambiguous tail	other	37.81	37.52	49.19	37.56	33.3	111.1	119.06	60.09
mmu-miR-181a-5p-1-2-10-8-CGGTGAGT	55.25	49.35	ambiguous tail	other	45.08	43.11	30.89	55.09	55.08	66.45	72.6	44.23
mmu-miR-181a-5p-1-2-2-0--	13427.7	16175.3	trimmed	other	10447.1	11313.5	18969.8	19236.4	8297.79	15221.4	20909.7	16764
mmu-miR-181a-5p-1-2-2-1-A	5339.73	3490.58	ambiguous tail	A	3057.7	3335.3	3394.24	3886.59	7677.82	3868.69	3779.06	4472.68
mmu-miR-181a-5p-1-2-2-1-C	142.99	92.44	ambiguous tail	C	17.45	12.77	0.1	68.87	40.99	373.79	363	14.19
mmu-miR-181a-5p-1-2-2-1-T	244.42	263.93	ambiguous tail	U	199.97	241.88	276.85	289.24	156.27	294.88	311.69	282.1
mmu-miR-181a-5p-1-2-2-2-AA	166.85	126.43	ambiguous tail	AA	78.53	137.31	138.42	123.96	119.13	174.43	153.91	206.98
mmu-miR-181a-5p-1-2-2-2-AT	47.02	36.16	ambiguous tail	AU	39.27	35.92	38.9	33.81	37.15	44.65	32.91	59.26
mmu-miR-181a-5p-1-2-2-2-CT	15.74	16.81	ambiguous tail	other	15.27	13.57	18.3	17.53	16.65	19.73	19.36	10.85
mmu-miR-181a-5p-1-2-2-2-TT	102.12	83.83	ambiguous tail	UU	48.72	57.48	50.34	137.73	93.51	127.71	124.87	85.13
mmu-miR-181a-5p-1-2-3-0--	6400.14	8334.33	trimmed	other	4373.85	5127.48	7715.12	11141.4	3172.83	8694.69	13313.8	7332.88
mmu-miR-181a-5p-1-2-3-1-G	5168.13	7087.23	ambiguous tail	G	2808.28	4234.18	5220.06	12481.2	2865.41	8885.74	10692.5	3753.24
mmu-miR-181a-5p-1-2-3-1-T	8622.69	9498.71	ambiguous tail	U	6606.23	7987.79	9518.06	9451.03	5778.22	10827.4	13930.4	9262.5
mmu-miR-181a-5p-1-2-3-2-GG	121.28	157.08	ambiguous tail	other	89.44	114.16	101.82	225.38	69.17	208.7	254.58	85.96
mmu-miR-181a-5p-1-2-3-3-GGT	111.16	126.45	ambiguous tail	other	117.07	112.56	149.86	111.44	83.26	118.37	141.33	131.87
mmu-miR-181a-5p-1-2-3-3-TGT	31.01	28.15	ambiguous tail	other	18.91	24.75	30.89	18.78	17.93	46.72	47.43	28.38
mmu-miR-181a-5p-1-2-4-1-A	263.14	277.18	ambiguous tail	A	151.98	192.39	302.02	294.25	128.09	324.99	445.28	336.35
mmu-miR-181a-5p-1-2-4-1-T	234.83	425.24	ambiguous tail	U	216.69	272.22	410.7	593.51	114	346.79	633.07	243.71
mmu-miR-181a-5p-1-2-4-4-TAGT	56.62	48.05	ambiguous tail	other	25.45	37.52	14.87	58.85	44.83	79.95	103.58	45.07
mmu-miR-181a-5p-1-2-5-5-AGAGT	87.93	90.14	ambiguous tail	other	77.81	70.25	107.54	87.65	62.76	110.06	107.45	90.97
mmu-miR-181a-5p-1-2-5-5-CGAGT	78.72	97.95	ambiguous tail	other	95.26	93.4	91.52	78.88	47.39	102.79	130.68	85.96
mmu-miR-181a-5p-1-2-5-5-GGAGT	22.54	59.26	ambiguous tail	other	18.91	31.93	187.62	28.8	14.09	17.65	29.04	35.89
mmu-miR-181a-5p-1-2-6-6-ATGAGT	27.47	33.6	ambiguous tail	other	31.99	27.94	34.32	26.29	24.34	28.03	47.43	30.05
mmu-miR-181a-5p-1-2-6-6-TTGAGT	56.99	47.27	ambiguous tail	other	32.72	28.74	33.18	40.07	39.71	86.18	101.64	45.07
mmu-miR-181a-5p-1-2-7-7-AGTGAGT	51.51	47.67	ambiguous tail	other	47.27	49.49	54.91	45.08	43.55	50.88	41.62	60.09
mmu-miR-181a-5p-1-2-7-7-CGTGAGT	28.52	28.76	ambiguous tail	other	29.09	23.95	18.3	25.04	26.9	39.46	47.43	19.2
mmu-miR-181a-5p-1-2-7-7-TGTGAGT	90.76	73.19	ambiguous tail	other	45.81	36.72	41.18	86.4	58.92	151.59	155.85	61.76
mmu-miR-181a-5p-1-2-8-7-GGTGAGT	42.41	34.19	ambiguous tail	other	39.27	13.57	18.3	17.53	14.09	74.76	82.28	38.39
mmu-miR-181a-5p-1-2-8-8-AGGTGAGT	155.84	137.79	ambiguous tail	other	104.71	83.82	85.8	146.5	97.35	210.77	268.13	159.41
mmu-miR-181a-5p-1-2-8-8-TGGTGAGT	51.92	58.21	ambiguous tail	other	55.99	55.08	50.34	55.09	29.46	73.72	74.54	52.58
mmu-miR-181a-5p-1-2-9-9-ACGGTGAGT	111.22	100.8	ambiguous tail	other	97.44	111.76	101.82	61.35	75.57	132.9	131.65	125.19
mmu-miR-181a-5p-1-2-9-9-CCGGTGAGT	68.98	75.55	ambiguous tail	other	55.99	73.44	77.79	68.87	57.64	63.34	101.64	85.96
mmu-miR-181b-1-3p-0-1-T	57.14	35.87	NT tail	U	35.63	35.13	25.17	26.29	32.02	85.14	57.11	54.25
mmu-miR-181b-1-3p-1-0--	4.24	2.44	trimmed	other	5.09	1.6	0.1	2.5	8.97	2.08	2.9	1.67
mmu-miR-181b-1-3p-1-1-T	69.05	78.2	ambiguous tail	U	90.17	59.87	49.19	90.15	56.36	100.71	101.64	50.08
mmu-miR-181b-5p-1-2-0-0--	3664.5	4026.12	canonical	other	3391.46	3291.39	3835.82	4465.07	2646.38	4889.34	5146.83	3457.79
mmu-miR-181b-5p-1-2-0-1-A	16.84	3.91	NT tail	A	7.27	11.97	0.1	0.1	12.81	13.5	0.1	24.2
mmu-miR-181b-5p-1-2-0-1-T	319.75	362.3	NT tail	U	370.12	394.36	332.9	250.42	217.76	405.97	463.67	335.51
mmu-miR-181b-5p-1-2-0-2-AT	22.84	2.6	NT tail	AU	0.1	0.1	12.58	0.1	17.93	23.88	0.1	26.71
mmu-miR-181b-5p-1-2-0-2-TT	96.56	119.49	NT tail	UU	130.89	139.7	118.98	71.37	79.42	101.75	136.49	108.5
mmu-miR-181b-5p-1-2-0-3-TTT	20.12	35.32	NT tail	UUU	40.72	45.5	32.03	22.54	16.65	22.84	35.82	20.87
mmu-miR-181b-5p-1-2-1-0--	4843.8	6072.44	trimmed	other	4474.93	4409.01	5840.11	7794.47	3062.68	6647.17	7843.67	4821.54
mmu-miR-181b-5p-1-2-1-1-A	82.63	59.11	ambiguous tail	A	66.17	42.31	49.19	70.12	57.64	97.6	67.76	92.64
mmu-miR-181b-5p-1-2-1-2-AA	35.1	9.17	ambiguous tail	AA	0.1	8.78	19.45	0.1	24.34	42.57	17.42	38.39
mmu-miR-181b-5p-1-2-1-2-AT	26.98	12.63	ambiguous tail	AU	21.09	21.55	0.1	0.1	39.71	18.69	20.33	22.53
mmu-miR-181b-5p-1-2-2-0--	7730.55	9512.65	trimmed	other	6418.62	6370.44	7250.66	13674.4	5575.84	11013.2	13849.1	6602.6
mmu-miR-181b-5p-1-2-2-1-A	807.17	676.37	ambiguous tail	A	525.01	528.47	641.78	765.05	481.63	1081.9	921.53	857.98
mmu-miR-181b-5p-1-2-2-1-G	273.5	339.7	ambiguous tail	G	154.16	191.59	173.89	498.35	88.38	617.79	680.5	114.34
mmu-miR-181b-5p-1-2-2-2-AA	111.79	74.42	ambiguous tail	AA	90.89	78.23	67.5	63.86	71.73	105.91	71.63	157.74
mmu-miR-181b-5p-1-2-2-2-AT	50.11	33.94	ambiguous tail	AU	45.81	26.34	30.89	25.04	52.52	56.07	41.62	41.73
mmu-miR-181b-5p-1-2-3-0--	1031.71	998.09	trimmed	other	674.8	750.4	694.41	1108.13	685.29	1894.89	1762.72	514.95
mmu-miR-181b-5p-1-2-3-1-A	7153.86	4737.3	ambiguous tail	A	3858.3	3914.07	4317.45	4620.34	8124.86	8490.15	6976.34	4846.58
mmu-miR-181b-5p-1-2-3-1-T	116.65	159.14	ambiguous tail	U	119.98	95	123.55	231.64	89.66	152.63	225.54	107.66
mmu-miR-181b-5p-1-2-3-2-AA	84.06	47.71	ambiguous tail	AA	31.27	39.12	42.33	42.57	55.08	102.79	83.25	94.31
mmu-miR-181b-5p-1-2-3-2-AT	37.26	28.75	ambiguous tail	AU	31.99	27.14	19.45	31.3	17.93	52.95	33.88	40.9
mmu-miR-181b-5p-1-2-3-2-TA	27.37	21.06	ambiguous tail	UA	13.82	17.56	28.6	16.28	15.37	46.72	29.04	20.03
mmu-miR-181b-5p-1-2-3-3-TAA	30.4	7.3	ambiguous tail	UAA	10.18	0.1	12.58	0.1	43.55	30.11	13.55	17.53
mmu-miR-181b-5p-1-2-4-1-T	556.89	695.59	ambiguous tail	U	420.3	526.08	686.4	760.04	306.14	927.2	1085.12	437.34
mmu-miR-181b-5p-1-2-4-2-TA	20.26	8.33	ambiguous tail	UA	0.1	0.1	17.16	0.1	17.93	31.15	24.2	11.68
mmu-miR-181b-5p-1-2-4-2-TT	37.44	46.6	ambiguous tail	UU	32.72	34.33	45.76	47.58	24.34	57.11	72.6	30.88
mmu-miR-181c-5p-0-0--	42584.6	45334.3	canonical	other	44811.8	49140.2	43648.1	40647.7	35952.8	47686.9	48424	44114.2
mmu-miR-181c-5p-0-1-A	140.98	122.39	NT tail	A	125.07	149.28	107.54	126.46	133.22	149.51	103.58	140.21
mmu-miR-181c-5p-0-1-G	52.17	69.06	NT tail	G	50.17	65.46	44.62	98.92	38.43	91.37	86.15	26.71
mmu-miR-181c-5p-0-1-T	42360.3	47575.2	NT tail	U	50610.9	53549.2	46384.5	41988.7	42785.2	41476.8	45342.8	42818.8
mmu-miR-181c-5p-0-2-TT	542.29	666.99	NT tail	UU	775.15	716.87	686.4	583.49	545.67	486.96	573.05	594.24
mmu-miR-181c-5p-0-3-TTT	15.47	16.15	NT tail	UUU	21.81	18.36	24.02	0.1	24.34	10.38	16.46	11.68
mmu-miR-181c-5p-1-0--	2872.04	3077.93	trimmed	other	2812.65	3366.43	2929.78	2983.81	2351.77	3278.94	3296.99	2985.4
mmu-miR-181c-5p-1-1-A	1226.77	1131.78	ambiguous tail	A	1307.43	1480.85	676.1	951.61	1052.91	1302.02	1242.91	1325.36
mmu-miR-181c-5p-1-1-G	80.98	106.94	ambiguous tail	G	75.62	100.59	58.34	123.96	51.24	139.13	176.18	52.58
mmu-miR-181c-5p-2-0--	495.1	524.09	trimmed	other	517.01	639.44	567.42	380.65	368.9	500.46	515.94	615.94
mmu-miR-181c-5p-2-1-A	28.91	14.96	ambiguous tail	A	13.09	15.17	16.02	15.03	39.71	27	15.49	20.03
mmu-miR-181c-5p-2-2-AA	42.18	24.05	ambiguous tail	AA	25.45	27.94	13.73	25.04	56.36	25.96	28.07	44.23
mmu-miR-181c-5p-3-0--	12.94	16.96	trimmed	other	13.09	13.57	22.88	18.78	12.81	13.5	16.46	12.52
mmu-miR-181c-5p-3-1-G	155.01	159.73	ambiguous tail	G	119.98	158.86	112.11	214.11	107.6	256.46	193.6	100.99
mmu-miR-181d-5p-0-0--	1799.19	2191.83	canonical	other	2196.02	1904.74	1975.68	2248.81	1116.96	2684	2633.92	1596.61
mmu-miR-181d-5p-0-1-A	44.58	19.54	NT tail	A	19.63	18.36	22.88	8.76	32.02	63.34	28.07	38.39
mmu-miR-181d-5p-0-1-T	750.74	798.43	NT tail	U	890.04	889.31	660.09	584.74	505.96	1081.9	968	664.35
mmu-miR-181d-5p-0-2-TT	61.01	75.02	NT tail	UU	96.71	99.79	35.46	46.33	39.71	92.41	96.8	50.91
mmu-miR-181d-5p-0-3-TTT	15.71	20.47	NT tail	UUU	15.27	27.94	11.44	22.54	11.53	15.57	25.17	20.03
mmu-miR-181d-5p-1-0--	1231.57	1560.35	trimmed	other	1227.44	1186.27	986.13	2019.68	863.34	1929.15	2382.24	902.21
mmu-miR-181d-5p-1-1-A	366.86	281.46	ambiguous tail	A	311.22	308.14	223.08	224.13	204.95	587.68	340.73	307.97
mmu-miR-181d-5p-1-1-G	91.47	79.24	ambiguous tail	G	41.45	51.09	45.76	91.41	28.18	217	166.5	29.21
mmu-miR-181d-5p-1-2-AA	35.3	20.3	ambiguous tail	AA	26.9	13.57	20.59	28.8	39.71	35.3	11.62	30.88
mmu-miR-181d-5p-2-0--	176.31	159.78	trimmed	other	145.43	137.31	88.09	128.97	71.73	382.09	299.11	75.11
mmu-miR-181d-5p-2-1-A	2020.66	1539.1	ambiguous tail	A	1132.91	1183.88	1145.14	1252.12	1626.77	3472.06	2981.43	963.14
mmu-miR-181d-5p-2-1-T	14.63	17.96	ambiguous tail	U	21.09	12.77	8.01	15.03	7.69	18.69	32.91	17.53
mmu-miR-181d-5p-2-2-AA	14.99	5.21	ambiguous tail	AA	0.1	6.39	0.1	0.1	8.97	17.65	19.36	18.36
mmu-miR-181d-5p-3-0--	53.27	62.51	trimmed	other	45.81	57.48	24.02	82.64	12.81	111.1	102.61	35.89
mmu-miR-181d-5p-3-1-T	23.43	22.18	ambiguous tail	U	24	28.74	12.58	0.1	8.97	48.8	45.5	12.52
mmu-miR-181d-5p-3-2-AA	21.87	17.33	ambiguous tail	AA	19.63	10.38	11.44	20.03	28.18	29.07	25.17	8.35
mmu-miR-182-5p-0-0--	17.35	22.8	canonical	other	16.72	23.95	26.31	23.79	14.09	6.23	23.23	31.72
mmu-miR-182-5p-0-1-G	6.39	3.82	NT tail	G	2.18	6.39	0.1	7.51	8.97	5.19	2.9	5.01
mmu-miR-182-5p-0-1-T	40.71	51.65	NT tail	U	29.81	38.32	61.78	45.08	66.61	36.34	83.25	19.2
mmu-miR-182-5p-1-0--	245.91	275.76	trimmed	other	232.69	237.89	324.9	232.89	240.81	282.42	350.41	214.49
mmu-miR-182-5p-2-0--	62.46	109.58	trimmed	other	90.17	86.22	180.75	81.39	49.96	62.3	109.38	75.11
mmu-miR-182-5p-2-1-A	3.79	0.93	ambiguous tail	A	0.1	0.8	1.14	2.5	5.12	2.08	0.1	4.17
mmu-miR-182-5p-3-0--	31.98	51.37	trimmed	other	45.08	33.53	73.22	36.31	25.62	39.46	68.73	30.88
mmu-miR-182-5p-3-1-A	1.61	1.4	ambiguous tail	A	2.91	1.6	2.29	0.1	1.28	1.04	0.1	2.5
mmu-miR-183-5p-0-0--	78.83	63.62	canonical	other	33.45	47.1	101.82	56.35	108.88	63.34	79.38	64.26
mmu-miR-183-5p-0-1-G	42.41	30.07	NT tail	G	29.81	18.36	37.75	23.79	60.2	31.15	40.66	35.89
mmu-miR-183-5p-0-2-GA	3.43	0.47	NT tail	other	0.1	0.1	0.1	0.1	3.84	3.11	1.94	3.34
mmu-miR-183-5p-0-2-GT	6.26	3.53	NT tail	other	2.91	0.8	3.43	3.76	10.25	5.19	6.78	3.34
mmu-miR-183-5p-1-0--	6.41	5.3	trimmed	other	2.91	3.19	5.72	5.01	11.53	5.19	9.68	2.5
mmu-miR-1839-3p-0-0--	35.55	50.9	canonical	other	68.35	63.86	51.48	47.58	44.83	30.11	23.23	31.72
mmu-miR-1839-3p-0-1-T	3.13	4.66	NT tail	U	10.18	8.78	1.14	1.25	1.28	3.11	1.94	5.01
mmu-miR-1839-3p-1-0--	52.07	65.9	trimmed	other	79.26	58.28	50.34	95.16	51.24	37.38	46.46	67.6
mmu-miR-1839-3p-1-1-T	20.41	22.82	ambiguous tail	U	33.45	27.14	21.74	16.28	17.93	20.77	15.49	22.53
mmu-miR-1839-3p-2-0--	80.53	74.78	trimmed	other	111.26	92.6	74.36	25.04	71.73	83.06	70.66	86.8
mmu-miR-1839-3p-3-0--	3.84	5.83	trimmed	other	8.73	11.18	2.29	5.01	2.56	3.11	1.94	5.84
mmu-miR-1839-5p-0-0--	413.05	580.1	canonical	other	486.47	494.95	533.1	477.06	192.14	653.09	908.95	393.94
mmu-miR-1839-5p-0-1-A	46.54	6.62	NT tail	A	9.45	2.39	14.87	2.5	25.62	70.6	3.87	43.4
mmu-miR-1839-5p-0-1-T	686.37	1048.88	ambiguous tail	U	657.35	641.04	863.72	1472.5	327.92	1264.64	1609.78	466.55
mmu-miR-1839-5p-0-2-TT	19.51	22.86	ambiguous tail	UU	12.36	18.36	28.6	16.28	11.53	31.15	38.72	15.86
mmu-miR-1839-5p-1-0--	56.97	89.51	trimmed	other	71.99	95	86.94	72.62	21.78	96.56	121	52.58
mmu-miR-1839-5p-1-1-A	5.85	0.1	ambiguous tail	A	0.1	0.1	0.1	0.1	3.84	10.38	0.1	3.34
mmu-miR-1839-5p-1-1-T	12.64	21.1	ambiguous tail	U	10.18	33.53	14.87	6.26	1.28	16.61	40.66	20.03
mmu-miR-1839-5p-2-0--	42.38	68.99	trimmed	other	38.54	69.45	74.36	63.86	17.93	67.49	98.74	41.73
mmu-miR-184-3p-0-0--	210.22	170.69	canonical	other	82.17	109.37	122.41	219.12	170.36	346.79	320.41	113.51
mmu-miR-184-3p-0-1-A	4.59	4.31	NT tail	A	3.64	2.39	3.43	6.26	2.56	10.38	5.81	0.83
mmu-miR-184-3p-0-1-T	19	13.64	NT tail	U	3.64	15.17	5.72	17.53	8.97	32.19	26.14	15.86
mmu-miR-184-3p-0-2-AT	28.75	17.05	NT tail	AU	12.36	18.36	11.44	15.03	30.74	40.49	28.07	15.02
mmu-miR-184-3p-0-2-TA	4.35	0.4	NT tail	UA	0.1	1.6	0.1	0.1	5.12	2.08	0.1	5.84
mmu-miR-184-3p-0-2-TT	6.49	3.24	NT tail	UU	1.45	4.79	0.1	5.01	5.12	9.34	4.84	5.01
mmu-miR-184-3p-1-0--	48.27	29.37	trimmed	other	8.73	21.55	24.02	32.56	43.55	73.72	60.02	27.54
mmu-miR-184-3p-1-1-A	13.09	11.54	ambiguous tail	A	2.18	7.18	19.45	16.28	6.4	22.84	12.58	10.02
mmu-miR-184-3p-2-0--	29.55	25.09	trimmed	other	10.18	10.38	17.16	11.27	12.81	67.49	76.47	8.35
mmu-miR-1843a-3p-0-0--	23.2	26.55	canonical	other	26.9	30.34	28.6	6.26	14.09	40.49	40.66	15.02
mmu-miR-1843a-3p-0-1-A	1.82	3.24	NT tail	A	4.36	3.19	2.29	2.5	2.56	2.08	3.87	0.83
mmu-miR-1843a-3p-0-2-AC	3.99	1.62	NT tail	other	6.54	0.1	0.1	1.25	3.84	3.11	0.1	5.01
mmu-miR-1843a-3p-1-0--	12.51	16.75	trimmed	other	16	15.97	14.87	17.53	11.53	17.65	19.36	8.35
mmu-miR-1843a-3p-1-1-T	7.99	9.77	ambiguous tail	U	8.73	13.57	14.87	8.76	8.97	4.15	2.9	10.85
mmu-miR-1843a-3p-2-0--	2.44	2.38	trimmed	other	2.91	2.39	4.58	0.1	1.28	5.19	1.94	0.83
mmu-miR-1843a-5p-0-0--	749.8	952.38	canonical	other	808.6	1040.98	895.75	862.71	461.13	1023.76	1153.85	764.5
mmu-miR-1843a-5p-0-1-T	1208.7	1532.61	NT tail	U	1200.54	1475.26	1613.04	1590.2	839	1673.73	1784.02	1113.37
mmu-miR-1843a-5p-0-2-TA	3.98	0.83	NT tail	UA	0.1	0.1	0.1	3.76	2.56	5.19	0.1	4.17
mmu-miR-1843a-5p-0-2-TT	16.38	18.58	NT tail	UU	11.63	27.14	29.74	5.01	8.97	17.65	19.36	22.53
mmu-miR-1843a-5p-0-3-TTA	6.7	0.1	NT tail	UUA	0.1	0.1	0.1	0.1	5.12	8.31	0.1	6.68
mmu-miR-1843a-5p-0-3-TTT	23.99	26.46	NT tail	UUU	18.91	30.34	26.31	32.56	32.02	24.92	24.2	15.02
mmu-miR-1843a-5p-1-0--	21.4	40.78	trimmed	other	31.99	38.32	37.75	42.57	6.4	43.61	53.24	14.19
mmu-miR-1843a-5p-1-1-A	38.05	50.32	ambiguous tail	A	40.72	47.9	42.33	53.84	21.78	58.14	66.79	34.22
mmu-miR-185-3p-0-0--	31.87	30.85	canonical	other	34.9	45.5	38.9	17.53	32.02	13.5	17.42	50.08
mmu-miR-185-3p-0-1-A	8.9	3.44	NT tail	A	1.45	3.19	6.86	3.76	1.28	10.38	1.94	15.02
mmu-miR-185-3p-0-1-T	4.68	11.29	NT tail	U	13.82	19.16	13.73	8.76	3.84	5.19	0.97	5.01
mmu-miR-185-5p-0-0--	210.34	280.48	canonical	other	202.15	205.16	265.41	195.33	210.07	244	534.33	176.94
mmu-miR-185-5p-0-1-A	44.25	8.64	NT tail	A	10.18	14.37	0.1	5.01	33.3	60.22	13.55	39.23
mmu-miR-185-5p-0-1-C	3.27	6.9	NT tail	C	1.45	0.1	6.86	12.52	1.28	5.19	13.55	3.34
mmu-miR-185-5p-0-1-T	50.2	76.86	NT tail	U	54.54	73.44	78.94	65.11	56.36	59.18	112.29	35.05
mmu-miR-185-5p-0-2-AA	40.15	2.09	NT tail	AA	1.45	1.6	2.29	1.25	40.99	51.91	3.87	27.54
mmu-miR-185-5p-0-2-AC	186.2	6.12	NT tail	other	15.27	0.1	2.29	10.02	179.33	231.54	2.9	147.73
mmu-miR-185-5p-0-2-AT	60.22	5.62	NT tail	AU	6.54	3.99	3.43	2.5	60.2	73.72	11.62	46.74
mmu-miR-185-5p-0-2-GA	20.93	0.1	NT tail	other	0.1	0.1	0.1	0.1	24.34	30.11	0.1	8.35
mmu-miR-185-5p-0-2-GT	4.77	0.1	NT tail	other	0.1	0.1	0.1	0.1	6.4	6.23	0.1	1.67
mmu-miR-185-5p-0-2-TA	10.04	3.83	NT tail	UA	2.18	4.79	0.1	6.26	15.37	11.42	5.81	3.34
mmu-miR-185-5p-0-2-TT	12.19	28.28	NT tail	UU	24.72	28.74	20.59	23.79	12.81	6.23	43.56	17.53
mmu-miR-185-5p-0-3-AAA	6.27	0.1	NT tail	AAA	0.1	0.1	0.1	0.1	2.56	6.23	0.1	10.02
mmu-miR-185-5p-0-3-AAC	14.18	0.1	NT tail	other	0.1	0.1	0.1	0.1	12.81	23.88	0.1	5.84
mmu-miR-185-5p-0-3-ACT	4.19	0.1	NT tail	other	0.1	0.1	0.1	0.1	3.84	6.23	0.1	2.5
mmu-miR-185-5p-1-0--	63.09	124.51	trimmed	other	85.08	83.02	108.68	150.25	52.52	71.64	195.54	65.1
mmu-miR-185-5p-1-1-T	50.07	155.98	ambiguous tail	U	118.53	119.75	164.74	125.21	65.33	53.99	251.68	30.88
mmu-miR-185-5p-1-2-TA	23.31	2.95	ambiguous tail	UA	5.09	3.19	0.1	2.5	25.62	30.11	3.87	14.19
mmu-miR-185-5p-1-2-TT	102.79	345.12	ambiguous tail	UU	209.42	245.88	358.07	334.32	115.28	112.14	577.89	80.96
mmu-miR-185-5p-1-3-TAA	4.27	0.1	ambiguous tail	UAA	0.1	0.1	0.1	0.1	5.12	5.19	0.1	2.5
mmu-miR-185-5p-1-3-TTT	5.14	21.14	ambiguous tail	UUU	11.63	23.15	18.3	31.3	1.28	8.31	21.3	5.84
mmu-miR-185-5p-2-0--	32.26	76.9	trimmed	other	58.9	71.85	60.63	78.88	33.3	34.26	114.22	29.21
mmu-miR-185-5p-2-1-T	2.3	6.08	ambiguous tail	U	2.91	0.1	4.58	2.5	1.28	3.11	20.33	2.5
mmu-miR-185-5p-3-0--	15.94	21.7	trimmed	other	10.91	12.77	16.02	38.82	24.34	21.8	30.01	1.67
mmu-miR-186-5p-0-0--	11139.4	9935.05	canonical	other	10996.8	10508	8718.4	10290	12692.6	9566.86	9162.08	11158.7
mmu-miR-186-5p-0-1-T	5215.23	5362	ambiguous tail	U	5433.32	5488.31	4642.34	5498.07	4690.72	6044.96	5747.96	4910.01
mmu-miR-186-5p-0-2-TT	146.69	149.57	ambiguous tail	UU	181.79	169.24	133.85	126.46	152.43	147.44	136.49	140.21
mmu-miR-186-5p-1-0--	8725.1	6745.78	trimmed	other	6388.08	6130.95	6012.85	6494.76	10119.2	8805.79	8702.28	7250.26
mmu-miR-186-5p-1-1-A	50.78	49.25	ambiguous tail	A	47.99	67.86	28.6	47.58	49.96	58.14	54.21	44.23
mmu-miR-186-5p-1-1-G	197.56	168.41	ambiguous tail	G	93.08	157.27	73.22	190.32	133.22	389.36	328.15	70.11
mmu-miR-186-5p-2-0--	140.47	91.34	trimmed	other	78.53	71.05	83.51	93.91	148.59	152.63	129.71	120.18
mmu-miR-186-5p-2-1-A	78.35	53.26	ambiguous tail	A	38.54	31.93	59.49	67.61	126.81	53.99	68.73	54.25
mmu-miR-186-5p-2-2-AA	77.92	50.71	ambiguous tail	AA	57.45	52.69	28.6	53.84	98.63	59.18	60.98	75.95
mmu-miR-186-5p-3-0--	66.14	55.2	trimmed	other	54.54	51.09	50.34	42.57	87.1	65.41	77.44	45.9
mmu-miR-186-5p-9-9-CTTTGGGCT	14.38	16.5	ambiguous tail	other	17.45	15.17	17.16	16.28	19.21	15.57	16.46	8.35
mmu-miR-187-3p-0-0--	64.64	61.57	canonical	other	70.53	71.05	56.06	46.33	73.01	67.49	63.89	53.42
mmu-miR-187-3p-0-1-A	118.04	21.34	NT tail	A	23.27	12.77	28.6	27.55	151.15	98.64	14.52	104.33
mmu-miR-187-3p-0-1-G	3.88	2.02	NT tail	G	0.73	1.6	4.58	1.25	7.69	3.11	1.94	0.83
mmu-miR-187-3p-0-1-T	48.76	40.28	NT tail	U	32.72	35.92	54.91	40.07	47.39	48.8	37.75	50.08
mmu-miR-187-3p-0-2-AA	25.54	2.49	NT tail	AA	2.91	1.6	6.86	0.1	42.27	13.5	0.97	20.87
mmu-miR-187-3p-0-2-AT	15.22	2.63	NT tail	AU	0.73	1.6	6.86	0.1	28.18	8.31	3.87	9.18
mmu-miR-187-3p-0-2-TT	6.49	5.65	NT tail	UU	5.09	7.18	10.3	3.76	3.84	7.27	1.94	8.35
mmu-miR-187-3p-0-3-AAT	4.55	0.1	NT tail	AAU	0.1	0.1	0.1	0.1	5.12	5.19	0.1	3.34
mmu-miR-187-3p-0-3-ATA	10.27	0.1	NT tail	AUA	0.1	0.1	0.1	0.1	16.65	4.15	0.1	10.02
mmu-miR-187-3p-0-3-ATT	11.79	1.63	NT tail	AUU	0.73	0.1	0.1	6.26	16.65	10.38	0.97	8.35
mmu-miR-187-3p-0-3-TAT	6.86	0.54	NT tail	UAU	0.73	0.8	0.1	0.1	7.69	6.23	0.97	6.68
mmu-miR-187-3p-0-3-TTT	3.13	2.35	NT tail	UUU	2.91	0.8	1.14	0.1	1.28	3.11	6.78	5.01
mmu-miR-187-3p-1-0--	79.01	63.52	trimmed	other	52.36	67.06	59.49	65.11	81.98	84.1	73.57	70.94
mmu-miR-187-3p-1-1-T	37.97	38.6	ambiguous tail	U	37.09	42.31	33.18	38.82	42.27	29.07	41.62	42.57
mmu-miR-187-3p-1-2-TA	7.2	0.24	ambiguous tail	UA	0.1	0.8	0.1	0.1	6.4	9.34	0.1	5.84
mmu-miR-187-3p-1-2-TT	7.64	13.38	ambiguous tail	UU	16.72	12.77	17.16	12.52	8.97	7.27	7.74	6.68
mmu-miR-187-3p-1-3-AAA	2.38	0.1	ambiguous tail	AAA	0.1	0.1	0.1	0.1	2.56	2.08	0.1	2.5
mmu-miR-187-3p-1-3-TGA	1.05	0.1	ambiguous tail	other	0.1	0.1	0.1	0.1	1.28	1.04	0.1	0.83
mmu-miR-187-3p-1-3-TTT	1.68	2.57	ambiguous tail	UUU	1.45	3.99	3.43	0.1	1.28	2.08	3.87	1.67
mmu-miR-187-3p-2-0--	36.58	52.41	trimmed	other	26.9	47.9	66.35	55.09	37.15	46.72	65.82	25.87
mmu-miR-187-3p-2-1-T	91.05	94.81	ambiguous tail	U	74.9	59.87	93.81	138.99	129.37	86.18	106.48	57.59
mmu-miR-187-3p-3-0--	21.8	30.87	trimmed	other	24	11.18	29.74	40.07	12.81	38.42	49.37	14.19
mmu-miR-187-5p-0-0--	31.05	19.89	canonical	other	10.18	15.17	13.73	40.07	47.39	29.07	20.33	16.69
mmu-miR-187-5p-0-1-A	32.69	5.65	NT tail	A	5.82	2.39	10.3	8.76	49.96	15.57	0.97	32.55
mmu-miR-187-5p-0-1-T	22.08	16.6	NT tail	U	16.72	9.58	16.02	30.05	43.55	9.34	10.65	13.35
mmu-miR-187-5p-0-2-AA	2.44	0.1	NT tail	AA	0.1	0.1	0.1	0.1	1.28	5.19	0.1	0.83
mmu-miR-187-5p-1-0--	9.07	11.44	trimmed	other	8.73	5.59	12.58	22.54	14.09	7.27	7.74	5.84
mmu-miR-187-5p-1-1-A	7.37	0.37	ambiguous tail	A	1.45	0.1	0.1	0.1	3.84	16.61	0.1	1.67
mmu-miR-187-5p-1-1-T	7.38	2.34	ambiguous tail	U	4.36	3.19	1.14	0.1	11.53	3.11	2.9	7.51
mmu-miR-187-5p-1-2-AA	3.89	0.1	ambiguous tail	AA	0.1	0.1	0.1	0.1	8.97	1.04	0.1	1.67
mmu-miR-188-3p-0-0--	46.22	33.13	canonical	other	47.99	30.34	16.02	41.32	66.61	27	30.01	45.07
mmu-miR-188-5p-0-0--	2.23	0.89	canonical	other	0.73	2.39	1.14	0.1	1.28	2.08	0.1	3.34
mmu-miR-188-5p-0-1-A	2.03	0.88	NT tail	A	2.18	0.1	0.1	0.1	2.56	1.04	1.94	2.5
mmu-miR-188-5p-0-1-T	7.98	4.47	NT tail	U	8	6.39	5.72	1.25	7.69	2.08	0.97	14.19
mmu-miR-188-5p-0-2-TT	4.09	4.37	NT tail	UU	8.73	8.78	2.29	0.1	7.69	2.08	1.94	2.5
mmu-miR-188-5p-1-2-AT	3.71	1.19	ambiguous tail	AU	0.1	1.6	0.1	1.25	3.84	3.11	2.9	4.17
mmu-miR-18a-3p-0-0--	36.04	16.47	canonical	other	18.18	14.37	11.44	32.56	69.17	15.57	5.81	23.37
mmu-miR-18a-3p-0-1-G	6.39	4.66	ambiguous tail	G	10.18	4.79	5.72	2.5	8.97	5.19	0.1	5.01
mmu-miR-18a-3p-0-1-T	9.33	10.64	NT tail	U	10.18	7.98	16.02	11.27	11.53	7.27	7.74	9.18
mmu-miR-18a-3p-1-0--	15.27	15.54	trimmed	other	16.72	16.76	17.16	12.52	17.93	18.69	14.52	9.18
mmu-miR-190a-3p-0-0--	4.75	1.78	canonical	other	2.18	0.8	4.58	1.25	11.53	1.04	0.1	1.67
mmu-miR-191-3p-0-0--	10.69	9.44	canonical	other	8	8.78	5.72	15.03	17.93	8.31	9.68	5.84
mmu-miR-191-3p-1-0--	3.73	2.73	trimmed	other	2.91	6.39	1.14	1.25	6.4	3.11	1.94	1.67
mmu-miR-191-5p-0-0--	132963	120592	canonical	other	114935	109713	135931	115870	128102	124520	126511	146267
mmu-miR-191-5p-0-1-A	387.88	29.9	NT tail	A	45.08	28.74	14.87	37.56	268.99	446.47	23.23	448.19
mmu-miR-191-5p-0-1-G	42.68	46.27	NT tail	G	32.72	34.33	41.18	77.63	44.83	49.84	45.5	33.38
mmu-miR-191-5p-0-1-T	21858	19144.5	ambiguous tail	U	20314.6	17422.9	21147.9	19857.4	28715.6	16160	16979.6	20698.3
mmu-miR-191-5p-0-2-AA	62.68	0.1	NT tail	AA	0.1	0.1	0.1	0.1	58.92	49.84	0.1	79.29
mmu-miR-191-5p-0-2-AT	36.44	0.1	NT tail	AU	0.1	0.1	0.1	0.1	35.87	42.57	0.1	30.88
mmu-miR-191-5p-0-2-TA	131.79	15.47	NT tail	UA	19.63	13.57	13.73	18.78	115.28	117.33	11.62	162.75
mmu-miR-191-5p-0-2-TT	88.39	57.15	ambiguous tail	UU	57.45	43.91	78.94	63.86	156.27	48.8	41.62	60.09
mmu-miR-191-5p-0-3-AAC	31.22	0.1	NT tail	other	0.1	0.1	0.1	0.1	32.02	24.92	0.1	36.72
mmu-miR-191-5p-0-3-AAT	151.27	0.1	NT tail	AAU	0.1	0.1	0.1	0.1	208.79	117.33	0.1	127.7
mmu-miR-191-5p-0-3-TAA	39.78	0.1	NT tail	UAA	0.1	0.1	0.1	0.1	33.3	25.96	0.1	60.09
mmu-miR-191-5p-0-3-TAT	115.31	21.37	NT tail	UAU	21.81	15.97	14.87	42.57	128.09	85.14	11.62	132.7
mmu-miR-191-5p-1-0--	6182.06	4165.1	trimmed	other	4469.11	4296.45	3769.47	2958.77	6901.59	6386.56	5331.72	5258.04
mmu-miR-191-5p-1-1-A	99.24	23.13	ambiguous tail	A	29.09	27.14	33.18	0.1	80.7	80.99	26.14	136.04
mmu-miR-191-5p-1-1-C	149.29	137.91	ambiguous tail	C	157.79	130.92	141.86	130.22	133.22	127.71	128.74	186.95
mmu-miR-191-5p-1-1-T	347.26	197.7	ambiguous tail	U	183.24	146.89	175.03	146.5	292.05	469.31	336.86	280.43
mmu-miR-191-5p-1-2-AT	31.52	0.1	ambiguous tail	AU	0.1	0.1	0.1	0.1	26.9	34.26	0.1	33.38
mmu-miR-191-5p-1-2-TT	40.08	17.63	ambiguous tail	UU	9.45	11.97	11.44	0.1	20.49	87.22	55.18	12.52
mmu-miR-191-5p-2-0--	2766.18	2026.8	trimmed	other	2111.67	2117.09	1913.91	1762.99	3204.86	2476.34	2228.33	2617.34
mmu-miR-191-5p-2-1-A	16.46	13.42	ambiguous tail	A	12.36	20.76	12.58	0.1	17.93	11.42	21.3	20.03
mmu-miR-191-5p-2-1-G	25.8	19.72	ambiguous tail	G	11.63	17.56	12.58	20.03	17.93	43.61	36.78	15.86
mmu-miR-191-5p-2-2-CG	31.43	36.83	ambiguous tail	other	38.54	37.52	46.9	35.06	30.74	21.8	26.14	41.73
mmu-miR-191-5p-2-2-GG	318.61	333.11	ambiguous tail	other	207.24	284.99	266.55	416.96	280.52	455.81	489.81	219.5
mmu-miR-191-5p-3-0--	1039.9	944.11	trimmed	other	928.58	845.4	1022.73	1055.54	1129.77	873.21	868.29	1116.71
mmu-miR-191-5p-3-3-ATG	30.74	23.3	ambiguous tail	other	18.91	19.16	12.58	30.05	40.99	18.69	35.82	32.55
mmu-miR-191-5p-5-5-GGCTG	27.49	22.92	ambiguous tail	other	36.36	21.55	34.32	0.1	24.34	19.73	22.26	38.39
mmu-miR-191-5p-6-6-AAGCTG	25.26	22.25	ambiguous tail	other	17.45	15.17	13.73	30.05	17.93	31.15	34.85	26.71
mmu-miR-191-5p-6-6-TAGCTG	16.31	13.52	ambiguous tail	other	21.81	15.17	16.02	0.1	16.65	11.42	14.52	20.87
mmu-miR-191-5p-7-7-TCAGCTG	18.29	16.31	ambiguous tail	other	11.63	14.37	0.1	22.54	12.81	18.69	32.91	23.37
mmu-miR-191-5p-8-7-GCAGCTG	31.85	20.54	ambiguous tail	other	19.63	21.55	29.74	16.28	40.99	22.84	15.49	31.72
mmu-miR-191-5p-8-8-GGCAGCTG	25.85	14.52	ambiguous tail	other	17.45	13.57	17.16	13.77	20.49	27	10.65	30.05
mmu-miR-191-5p-9-7-GCAGCTG	13.32	12.44	ambiguous tail	other	8.73	15.97	22.88	0.1	16.65	12.46	14.52	10.85
mmu-miR-1912-3p-0-0--	41.89	17.18	canonical	other	26.18	11.18	8.01	25.04	20.49	38.42	15.49	66.77
mmu-miR-1912-3p-1-0--	6.69	5.88	trimmed	other	12.36	2.39	2.29	7.51	2.56	4.15	4.84	13.35
mmu-miR-192-3p-0-1-T	1.4	2.47	NT tail	U	0.73	6.39	0.1	1.25	1.28	2.08	3.87	0.83
mmu-miR-192-5p-0-0--	6504.51	5997.01	canonical	other	5764.18	5071.6	5090.79	5316.52	5160.82	9176.46	8741.97	5176.25
mmu-miR-192-5p-0-1-A	318.88	297.33	ambiguous tail	A	303.22	266.63	250.54	274.22	226.72	423.62	392.04	306.3
mmu-miR-192-5p-0-1-G	27.02	21.26	NT tail	G	0.1	16.76	11.44	23.79	15.37	49.84	54.21	15.86
mmu-miR-192-5p-0-1-T	988.95	857.79	NT tail	U	857.32	778.34	677.25	743.76	983.75	1204.42	1232.26	778.69
mmu-miR-192-5p-0-2-AA	26.86	0.1	NT tail	AA	0.1	0.1	0.1	0.1	17.93	30.11	0.1	32.55
mmu-miR-192-5p-0-2-AT	80.5	88.67	NT tail	AU	100.35	75.84	94.95	97.67	76.86	86.18	74.54	78.45
mmu-miR-192-5p-0-3-AGT	62.48	70.09	ambiguous tail	other	58.9	79.03	61.78	71.37	47.39	75.8	79.38	64.26
mmu-miR-192-5p-0-3-ATT	32.59	29.98	NT tail	AUU	37.81	24.75	35.46	23.79	15.37	45.69	28.07	36.72
mmu-miR-192-5p-1-0--	133.34	119.69	trimmed	other	97.44	104.58	122.41	81.39	89.66	199.35	192.63	111
mmu-miR-192-5p-1-1-T	14.13	11.11	ambiguous tail	U	0.1	14.37	14.87	8.76	14.09	16.61	17.42	11.68
mmu-miR-1927-2-0--	10.67	12.52	trimmed	other	17.45	9.58	19.45	11.27	14.09	6.23	4.84	11.68
mmu-miR-1930-5p-0-0--	2.66	3	canonical	other	2.18	2.39	5.72	3.76	2.56	2.08	0.97	3.34
mmu-miR-1933-3p-0-0--	8.58	9.83	canonical	other	8.73	12.77	5.72	11.27	5.12	7.27	10.65	13.35
mmu-miR-1934-5p-0-0--	3.46	4.74	canonical	other	3.64	3.99	3.43	8.76	7.69	1.04	3.87	1.67
mmu-miR-193a-5p-0-0--	4.28	2.45	canonical	other	1.45	3.99	5.72	0.1	5.12	1.04	0.97	6.68
mmu-miR-193b-3p-0-0--	125.52	135.58	canonical	other	220.33	146.09	152.15	96.41	147.31	53.99	62.92	175.27
mmu-miR-193b-3p-0-1-T	115.77	77.52	ambiguous tail	U	111.26	91.01	90.38	38.82	194.7	24.92	56.14	127.7
mmu-miR-193b-3p-0-2-TT	31.98	35.12	ambiguous tail	UU	37.09	43.91	40.04	40.07	64.05	5.19	14.52	26.71
mmu-miR-193b-3p-0-3-TTT	1.33	5.18	ambiguous tail	UUU	6.54	7.18	8.01	1.25	1.28	1.04	2.9	1.67
mmu-miR-193b-3p-1-0--	5.47	9.55	trimmed	other	23.27	7.18	12.58	3.76	6.4	4.15	0.97	5.84
mmu-miR-194-2-3p-0-1-T	1.61	1.6	NT tail	U	1.45	2.39	1.14	0.1	1.28	1.04	2.9	2.5
mmu-miR-194-5p-1-2-0-0--	160.89	192.38	canonical	other	195.61	201.97	203.63	169.04	153.71	192.08	191.66	136.88
mmu-miR-194-5p-1-2-0-1-A	73.15	75.73	NT tail	A	71.99	91.8	66.35	70.12	76.86	71.64	78.41	70.94
mmu-miR-194-5p-1-2-0-1-T	51.94	55.43	NT tail	U	53.81	45.5	34.32	65.11	48.67	65.41	78.41	41.73
mmu-miR-194-5p-1-2-0-2-AA	1.68	1.98	NT tail	AA	0.73	7.98	0.1	0.1	1.28	2.08	0.97	1.67
mmu-miR-194-5p-1-2-0-2-AT	17.26	13.98	NT tail	AU	24	11.18	3.43	10.02	16.65	25.96	21.3	9.18
mmu-miR-194-5p-1-2-0-2-TT	6.41	3.67	NT tail	UU	4.36	2.39	2.29	2.5	11.53	5.19	6.78	2.5
mmu-miR-194-5p-1-2-1-0--	41.4	66.4	trimmed	other	67.63	50.29	43.47	43.82	24.34	62.3	126.81	37.56
mmu-miR-194-5p-1-2-1-1-G	1.74	1.13	ambiguous tail	G	0.1	1.6	0.1	3.76	1.28	3.11	0.1	0.83
mmu-miR-194-5p-1-2-1-1-T	41.94	53.76	ambiguous tail	U	46.54	47.1	56.06	51.34	32.02	61.26	67.76	32.55
mmu-miR-1943-5p-0-0--	37.84	26.05	canonical	other	17.45	24.75	43.47	30.05	32.02	15.57	14.52	65.93
mmu-miR-1947-5p-1-0--	100.47	95.35	trimmed	other	98.17	104.58	110.97	70.12	126.81	94.48	92.93	80.12
mmu-miR-1947-5p-2-0--	13.09	11.09	trimmed	other	16.72	4.79	10.3	18.78	14.09	13.5	4.84	11.68
mmu-miR-1948-3p-0-0--	10.3	14.36	canonical	other	10.18	9.58	16.02	13.77	11.53	9.34	22.26	10.02
mmu-miR-1955-5p-2-0--	11.1	14.86	trimmed	other	18.18	9.58	20.59	16.28	15.37	2.08	9.68	15.86
mmu-miR-195a-3p-0-0--	11.38	15.76	canonical	other	5.09	15.97	25.17	11.27	7.69	11.42	21.3	15.02
mmu-miR-195a-3p-0-1-A	9	5.37	ambiguous tail	A	6.54	3.19	5.72	7.51	6.4	15.57	3.87	5.01
mmu-miR-195a-3p-0-1-T	5.11	7.03	NT tail	U	6.54	3.99	5.72	15.03	5.12	5.19	3.87	5.01
mmu-miR-195a-3p-0-2-AT	18.27	18.64	NT tail	AU	12.36	15.17	29.74	17.53	10.25	18.69	18.39	25.87
mmu-miR-195a-3p-0-3-AAT	4.9	0.88	NT tail	AAU	0.1	3.99	0.1	0.1	5.12	6.23	0.1	3.34
mmu-miR-195a-3p-0-3-ATT	10.96	15.37	NT tail	AUU	8.73	10.38	19.45	23.79	6.4	7.27	14.52	19.2
mmu-miR-195a-3p-0-3-TAT	1.05	0.1	NT tail	UAU	0.1	0.1	0.1	0.1	1.28	1.04	0.1	0.83
mmu-miR-195a-3p-2-0--	3.23	3.29	trimmed	other	2.91	4.79	1.14	3.76	5.12	2.08	3.87	2.5
mmu-miR-1960-0-0--	2.61	2.56	canonical	other	1.45	0.1	4.58	3.76	5.12	1.04	2.9	1.67
mmu-miR-1964-3p-0-0--	39.38	28.77	canonical	other	28.36	30.34	30.89	30.05	51.24	17.65	24.2	49.24
mmu-miR-1964-3p-1-0--	18.31	15.58	trimmed	other	4.36	15.17	24.02	27.55	23.06	9.34	6.78	22.53
mmu-miR-1964-3p-1-1-A	1.33	0.45	ambiguous tail	A	0.1	0.8	1.14	0.1	1.28	1.04	0.1	1.67
mmu-miR-1964-3p-2-0--	4.4	10.36	trimmed	other	12.36	11.18	3.43	11.27	2.56	3.11	13.55	7.51
mmu-miR-1966-3p-0-1-T	13.9	28.73	NT tail	U	17.45	15.17	35.46	60.1	17.93	6.23	15.49	17.53
mmu-miR-1968-5p-0-0--	9.15	5.13	canonical	other	5.09	3.99	2.29	7.51	15.37	6.23	6.78	5.84
mmu-miR-1969-0-0--	12.79	12.2	canonical	other	5.09	14.37	6.86	16.28	12.81	23.88	18.39	1.67
mmu-miR-1981-3p-0-0--	24.07	16.14	canonical	other	18.91	13.57	16.02	22.54	39.71	8.31	9.68	24.2
mmu-miR-1981-3p-0-1-A	91.74	52.96	NT tail	A	65.44	45.5	38.9	101.42	146.02	37.38	13.55	91.81
mmu-miR-1981-3p-0-1-T	7.49	5.03	NT tail	U	5.82	3.99	0.1	7.51	8.97	9.34	7.74	4.17
mmu-miR-1981-3p-0-3-AGT	61.91	42.27	NT tail	other	50.17	42.31	50.34	37.56	90.95	32.19	30.98	62.6
mmu-miR-1981-3p-1-0--	9.06	9.43	trimmed	other	7.27	11.97	13.73	11.27	12.81	5.19	2.9	9.18
mmu-miR-1982-3p-0-0--	13.01	11.97	canonical	other	12.36	11.97	14.87	10.02	12.81	14.54	10.65	11.68
mmu-miR-1982-3p-0-1-A	1.82	0.1	NT tail	A	0.1	0.1	0.1	0.1	2.56	2.08	0.1	0.83
mmu-miR-1982-3p-1-0--	19.29	15.53	trimmed	other	26.9	12.77	12.58	13.77	15.37	16.61	11.62	25.87
mmu-miR-1982-3p-2-0--	4.02	1.49	trimmed	other	1.45	0.8	0.1	5.01	7.69	1.04	0.1	3.34
mmu-miR-1983-0-0--	200.21	150.13	canonical	other	211.6	110.96	108.68	200.34	308.7	169.24	119.06	122.69
mmu-miR-1983-0-1-C	8.61	5.71	NT tail	C	5.09	2.39	3.43	13.77	8.97	9.34	3.87	7.51
mmu-miR-1983-0-1-T	14.59	10.19	NT tail	U	13.82	4.79	3.43	25.04	19.21	14.54	3.87	10.02
mmu-miR-1983-1-0--	33.06	31.14	trimmed	other	39.99	15.97	21.74	45.08	39.71	39.46	32.91	20.03
mmu-miR-1983-1-1-A	58.84	26.11	ambiguous tail	A	22.54	26.34	18.3	27.55	87.1	60.22	35.82	29.21
mmu-miR-1983-1-1-C	86.13	104.59	ambiguous tail	C	105.44	102.98	118.98	115.2	103.75	82.03	80.34	72.61
mmu-miR-1983-1-2-CA	9.87	12.18	ambiguous tail	other	16.72	9.58	11.44	12.52	10.25	9.34	10.65	10.02
mmu-miR-1983-1-2-CT	14.49	11.2	ambiguous tail	other	10.91	4.79	5.72	28.8	16.65	17.65	5.81	9.18
mmu-miR-1983-2-0--	10.32	5.44	trimmed	other	10.91	10.38	5.72	0.1	23.06	6.23	0.1	1.67
mmu-miR-1983-2-2-AA	1.68	0.1	ambiguous tail	AA	0.1	0.1	0.1	0.1	1.28	2.08	0.1	1.67
mmu-miR-1983-2-2-AT	3.22	1.29	ambiguous tail	AU	0.1	0.1	1.14	5.01	3.84	4.15	0.1	1.67
mmu-miR-1983-2-3-ACC	7.32	2.43	ambiguous tail	other	0.73	4.79	3.43	1.25	12.81	8.31	1.94	0.83
mmu-miR-1983-2-3-ACT	12.14	3.84	ambiguous tail	other	2.18	5.59	5.72	3.76	24.34	6.23	1.94	5.84
mmu-miR-1983-2-3-TTT	3.22	1.47	ambiguous tail	UUU	2.18	1.6	0.1	2.5	3.84	4.15	0.97	1.67
mmu-miR-199a-3p-1-2-199b-3p-0-0--	122.3	109.54	canonical	other	85.8	80.63	52.62	36.31	67.89	218.04	292.33	80.96
mmu-miR-199a-3p-1-2-199b-3p-0-1-A	6.89	7.07	NT tail	A	7.27	8.78	2.29	2.5	2.56	7.27	14.52	10.85
mmu-miR-199a-3p-1-2-199b-3p-0-1-T	6.73	8.17	NT tail	U	10.91	9.58	4.58	1.25	8.97	6.23	14.52	5.01
mmu-miR-199a-3p-1-2-199b-3p-0-2-TT	6.91	14.63	NT tail	UU	13.82	7.98	8.01	28.8	5.12	7.27	14.52	8.35
mmu-miR-199a-3p-1-2-199b-3p-1-0--	344.19	413.33	trimmed	other	461.02	333.69	289.43	345.59	226.72	427.78	636.94	378.08
mmu-miR-199a-3p-1-2-199b-3p-1-1-T	19.18	17.52	ambiguous tail	U	17.45	20.76	5.72	0.1	3.84	31.15	43.56	22.53
mmu-miR-199a-3p-1-2-199b-3p-2-0--	23.59	32.67	trimmed	other	37.81	22.35	17.16	25.04	17.93	31.15	60.98	21.7
mmu-miR-199a-3p-1-2-199b-3p-2-1-A	23.95	25.32	ambiguous tail	A	26.18	12.77	30.89	11.27	12.81	45.69	45.5	13.35
mmu-miR-199a-5p-1-2-0-0--	167.8	131.69	canonical	other	43.63	42.31	50.34	27.55	51.24	390.4	494.65	61.76
mmu-miR-199a-5p-1-2-0-1-T	11.97	12.3	NT tail	U	17.45	18.36	4.58	16.28	12.81	11.42	4.84	11.68
mmu-miR-199a-5p-1-2-1-0--	31.3	21.89	trimmed	other	15.27	7.98	1.14	3.76	14.09	62.3	81.31	17.53
mmu-miR-199a-5p-1-2-1-1-A	3.9	1.63	ambiguous tail	A	0.1	2.39	4.58	0.1	2.56	8.31	0.97	0.83
mmu-miR-199a-5p-1-2-1-1-T	18.42	27.08	ambiguous tail	U	21.81	25.55	19.45	25.04	12.81	24.92	43.56	17.53
mmu-miR-199a-5p-1-2-2-0--	16.78	17.55	trimmed	other	13.82	13.57	11.44	15.03	15.37	20.77	33.88	14.19
mmu-miR-199a-5p-1-2-3-0--	2.81	2.66	trimmed	other	0.73	4.79	4.58	1.25	3.84	2.08	1.94	2.5
mmu-miR-199b-5p-0-0--	3.63	2.37	canonical	other	0.73	0.8	3.43	0.1	2.56	4.15	6.78	4.17
mmu-miR-19b-3p-1-2-0-0--	31.34	26.17	canonical	other	29.09	26.34	10.3	22.54	32.02	39.46	42.59	22.53
mmu-miR-19b-3p-1-2-1-0--	32.86	29.99	trimmed	other	34.9	26.34	26.31	27.55	48.67	33.23	34.85	16.69
mmu-miR-19b-3p-1-2-1-1-T	7.67	12.97	ambiguous tail	U	9.45	14.37	10.3	7.51	5.12	10.38	23.23	7.51
mmu-miR-19b-3p-1-2-1-2-TA	5.53	2.01	ambiguous tail	UA	0.1	3.19	0.1	3.76	6.4	5.19	2.9	5.01
mmu-miR-19b-3p-1-2-1-2-TT	2.45	1.99	ambiguous tail	UU	3.64	0.8	0.1	2.5	2.56	3.11	2.9	1.67
mmu-miR-19b-3p-1-2-3-0--	4.33	2.74	trimmed	other	1.45	0.1	2.29	5.01	3.84	4.15	4.84	5.01
mmu-miR-200b-3p-0-0--	2.81	3.76	canonical	other	5.82	6.39	4.58	0.1	3.84	2.08	1.94	2.5
mmu-miR-200b-3p-0-1-C	18.57	15.92	NT tail	C	21.81	11.18	8.01	3.76	30.74	12.46	34.85	12.52
mmu-miR-200b-3p-0-2-CT	12.68	15.64	NT tail	other	24.72	11.18	11.44	3.76	15.37	13.5	27.1	9.18
mmu-miR-200c-3p-0-0--	2.89	1.82	canonical	other	0.1	1.6	2.29	5.01	5.12	1.04	0.1	2.5
mmu-miR-201-5p-0-0--	3.02	2.16	canonical	other	4.36	1.6	0.1	3.76	5.12	3.11	0.97	0.83
mmu-miR-203-3p-0-0--	27.53	18.95	canonical	other	18.18	27.14	13.73	3.76	14.09	30.11	31.94	38.39
mmu-miR-203-3p-0-1-A	44.61	16.26	ambiguous tail	A	16	18.36	11.44	20.03	10.25	76.83	15.49	46.74
mmu-miR-203-3p-0-1-T	13.37	21	NT tail	U	22.54	27.14	19.45	8.76	6.4	18.69	27.1	15.02
mmu-miR-203-3p-2-0--	14.29	20.19	trimmed	other	18.91	29.54	13.73	8.76	7.69	17.65	30.01	17.53
mmu-miR-204-3p-0-0--	18.83	14.31	canonical	other	13.82	17.56	4.58	28.8	8.97	8.31	6.78	39.23
mmu-miR-204-3p-1-0--	3	1.66	trimmed	other	2.18	0.8	1.14	1.25	1.28	1.04	2.9	6.68
mmu-miR-205-5p-0-1-T	3.7	3.52	NT tail	U	9.45	1.6	1.14	2.5	2.56	1.04	2.9	7.51
mmu-miR-208b-3p-0-0--	8.3	2.97	canonical	other	7.27	6.39	0.1	0.1	5.12	7.27	0.97	12.52
mmu-miR-208b-3p-1-0--	4.53	2.12	trimmed	other	2.91	2.39	2.29	0.1	2.56	5.19	2.9	5.84
mmu-miR-20a-3p-0-1-T	9.13	3.48	ambiguous tail	U	4.36	1.6	4.58	0.1	14.09	8.31	6.78	5.01
mmu-miR-20a-5p-0-0--	83.4	91.74	canonical	other	111.26	124.53	81.22	61.35	51.24	103.83	80.34	95.15
mmu-miR-20a-5p-0-1-T	10.7	14.85	ambiguous tail	U	16.72	5.59	25.17	11.27	19.21	10.38	15.49	2.5
mmu-miR-20a-5p-1-0--	4.06	4.66	trimmed	other	5.09	6.39	6.86	0.1	5.12	6.23	4.84	0.83
mmu-miR-210-3p-0-0--	29.85	33.9	canonical	other	37.09	44.7	36.61	16.28	28.18	36.34	34.85	25.04
mmu-miR-210-3p-0-1-A	3.89	1.63	NT tail	A	0.1	1.6	3.43	0.1	1.28	6.23	2.9	4.17
mmu-miR-210-3p-0-1-T	11.17	11.34	NT tail	U	14.54	8.78	12.58	6.26	7.69	12.46	14.52	13.35
mmu-miR-210-3p-0-2-AA	3.63	0.1	NT tail	AA	0.1	0.1	0.1	0.1	2.56	4.15	0.1	4.17
mmu-miR-210-3p-0-2-AT	2.31	0.72	NT tail	AU	0.1	3.19	0.1	0.1	2.56	1.04	0.1	3.34
mmu-miR-210-3p-0-2-TT	6.66	6.21	NT tail	UU	2.18	3.19	9.15	8.76	8.97	9.34	7.74	1.67
mmu-miR-210-3p-1-0--	5.79	6.94	trimmed	other	7.27	7.18	10.3	1.25	2.56	3.11	8.71	11.68
mmu-miR-210-3p-1-1-T	25.64	35.91	ambiguous tail	U	45.08	34.33	37.75	27.55	20.49	28.03	34.85	28.38
mmu-miR-210-3p-2-0--	32.83	56.92	trimmed	other	50.9	55.08	76.65	31.3	25.62	35.3	70.66	37.56
mmu-miR-210-3p-2-1-T	3.32	4.93	ambiguous tail	U	4.36	8.78	4.58	5.01	6.4	1.04	1.94	2.5
mmu-miR-210-3p-3-0--	5.16	7.54	trimmed	other	5.82	1.6	10.3	11.27	3.84	8.31	8.71	3.34
mmu-miR-210-5p-0-0--	27.15	28.77	canonical	other	21.09	18.36	61.78	30.05	42.27	8.31	12.58	30.88
mmu-miR-210-5p-0-1-C	5.63	4.28	NT tail	C	6.54	4.79	8.01	0.1	10.25	4.15	1.94	2.5
mmu-miR-212-3p-0-0--	135.23	143.5	canonical	other	144.7	156.47	171.6	131.47	169.08	87.22	113.26	149.4
mmu-miR-212-3p-0-1-C	377.57	270.77	ambiguous tail	C	283.59	256.25	310.02	335.57	607.16	181.7	168.43	343.86
mmu-miR-212-3p-0-1-T	31.89	39.48	NT tail	U	42.9	46.3	42.33	30.05	39.71	34.26	35.82	21.7
mmu-miR-212-3p-0-2-CA	13.1	1.2	NT tail	other	0.1	5.59	0.1	0.1	23.06	6.23	0.1	10.02
mmu-miR-212-3p-0-2-CT	214.71	228.47	NT tail	other	233.42	242.68	286	246.67	293.33	120.44	133.58	230.35
mmu-miR-212-3p-0-2-TT	49.32	67.61	NT tail	UU	34.18	75.84	92.66	67.61	55.08	35.3	67.76	57.59
mmu-miR-212-3p-0-3-TTT	12.8	12.07	NT tail	UUU	20.36	13.57	13.73	0.1	19.21	4.15	12.58	15.02
mmu-miR-212-3p-1-0--	1390.69	1555.52	trimmed	other	1164.18	1302.03	1627.91	2078.52	1865.02	1051.79	1604.94	1255.25
mmu-miR-212-3p-1-1-T	122.19	114.61	ambiguous tail	U	98.89	106.97	88.09	73.88	99.91	172.36	205.22	94.31
mmu-miR-212-3p-2-0--	542.82	521.04	trimmed	other	453.75	469.4	499.93	580.99	721.16	464.12	601.13	443.18
mmu-miR-212-3p-2-1-A	25.84	14.52	ambiguous tail	A	15.27	19.96	16.02	8.76	28.18	21.8	12.58	27.54
mmu-miR-212-3p-2-1-T	26.69	38.28	ambiguous tail	U	28.36	41.51	48.05	33.81	20.49	22.84	39.69	36.72
mmu-miR-212-3p-3-0--	19.49	38.98	trimmed	other	24	19.96	17.16	77.63	10.25	37.38	56.14	10.85
mmu-miR-212-5p-0-0--	2810.55	2354.53	canonical	other	1961.87	2317.47	2278.84	2844.82	3367.53	2593.66	2369.65	2470.45
mmu-miR-212-5p-0-1-G	417.85	350.77	ambiguous tail	G	263.96	305.75	299.73	514.62	498.28	403.9	369.77	351.37
mmu-miR-212-5p-0-2-GA	12.74	0.1	NT tail	other	0.1	0.1	0.1	0.1	12.81	10.38	0.1	15.02
mmu-miR-212-5p-0-2-GT	57.04	43.25	NT tail	other	43.63	45.5	25.17	52.59	93.51	46.72	49.37	30.88
mmu-miR-212-5p-1-0--	90.01	64.96	trimmed	other	46.54	44.7	57.2	56.35	64.05	165.09	120.03	40.9
mmu-miR-212-5p-3-0--	6.45	4.03	trimmed	other	0.1	0.1	4.58	3.76	7.69	4.15	11.62	7.51
mmu-miR-2137-6-5-GGGGA	17.09	13.4	ambiguous tail	other	5.09	6.39	26.31	26.29	17.93	8.31	2.9	25.04
mmu-miR-214-3p-0-0--	5.87	10.58	canonical	other	18.18	10.38	16.02	2.5	3.84	2.08	5.81	11.68
mmu-miR-215-5p-0-1-A	2.02	2.52	NT tail	A	2.18	0.1	2.29	1.25	1.28	3.11	6.78	1.67
mmu-miR-215-5p-0-1-C	4.27	2.95	ambiguous tail	C	3.64	2.39	5.72	0.1	5.12	5.19	2.9	2.5
mmu-miR-218-1-3p-0-0--	12.76	9.13	canonical	other	18.18	7.18	4.58	13.77	5.12	3.11	1.94	30.05
mmu-miR-218-1-3p-1-0--	12.27	8.85	trimmed	other	10.91	11.18	2.29	15.03	23.06	2.08	4.84	11.68
mmu-miR-218-1-3p-3-0--	10.42	11.67	trimmed	other	16	21.55	3.43	12.52	17.93	4.15	4.84	9.18
mmu-miR-218-2-3p-0-0--	2.61	1.27	canonical	other	1.45	2.39	2.29	0.1	5.12	1.04	0.1	1.67
mmu-miR-218-2-3p-0-1-T	10.48	9.05	NT tail	U	13.09	11.18	11.44	3.76	15.37	1.04	5.81	15.02
mmu-miR-218-5p-1-2-0-0--	5706.23	5705.1	canonical	other	4653.81	5717.43	4036.02	3856.54	2923.06	10826.3	10261.7	3369.32
mmu-miR-218-5p-1-2-0-1-A	186.9	51.56	NT tail	A	36.36	52.69	51.48	47.58	98.63	326.03	69.7	136.04
mmu-miR-218-5p-1-2-0-1-G	1547.77	1574.43	NT tail	G	1283.43	1317.99	1197.77	1312.23	768.55	3035.98	2760.72	838.78
mmu-miR-218-5p-1-2-0-1-T	22.95	27.74	NT tail	U	29.09	19.16	17.16	20.03	8.97	45.69	53.24	14.19
mmu-miR-218-5p-1-2-0-2-GA	103.84	68.57	NT tail	other	84.35	90.21	51.48	41.32	65.33	136.02	75.5	110.17
mmu-miR-218-5p-1-2-0-2-GG	457.31	510.34	NT tail	other	468.29	478.18	423.28	396.92	233.13	874.25	785.04	264.57
mmu-miR-218-5p-1-2-0-2-GT	691.61	704.74	NT tail	other	764.24	621.08	588.01	651.1	445.76	1152.51	899.27	476.56
mmu-miR-218-5p-1-2-0-3-GAT	140.47	79.79	NT tail	other	70.53	67.86	80.08	70.12	80.7	222.2	110.35	118.51
mmu-miR-218-5p-1-2-0-3-GGA	34.98	22.17	NT tail	other	17.45	12.77	10.3	32.56	29.46	52.95	37.75	22.53
mmu-miR-218-5p-1-2-0-3-GGT	1385.08	1497.86	NT tail	other	1294.34	1323.58	1500.92	1744.21	947.88	2148.24	1626.23	1059.12
mmu-miR-218-5p-1-2-1-0--	2010.01	1951.05	trimmed	other	1469.59	1687.61	1404.83	1752.97	792.89	4067.01	3440.26	1170.12
mmu-miR-218-5p-1-2-1-1-G	30.93	23.76	ambiguous tail	G	13.09	15.17	0.1	27.55	11.53	65.41	62.92	15.86
mmu-miR-218-5p-1-2-3-0--	37.96	30.39	trimmed	other	14.54	30.34	20.59	31.3	23.06	75.8	55.18	15.02
mmu-miR-219a-1-3p-0-1-A	17.34	2.26	NT tail	A	0.73	0.1	10.3	0.1	23.06	7.27	0.1	21.7
mmu-miR-219a-2-3p-0-0--	1353.8	1342.3	canonical	other	1382.33	938	950.66	1553.89	933.79	1809.75	1886.62	1317.85
mmu-miR-219a-2-3p-0-1-A	24.21	3.08	NT tail	A	0.1	4.79	10.3	0.1	10.25	41.53	0.1	20.87
mmu-miR-219a-2-3p-0-1-C	8.7	9.09	NT tail	C	10.91	7.98	3.43	3.76	2.56	9.34	19.36	14.19
mmu-miR-219a-2-3p-0-1-T	150.63	168.86	NT tail	U	145.43	138.9	124.7	199.09	105.04	202.47	236.19	144.39
mmu-miR-219a-2-3p-0-2-TT	11.47	8.9	NT tail	UU	7.27	7.18	2.29	20.03	11.53	14.54	7.74	8.35
mmu-miR-219a-2-3p-1-0--	152.89	142.85	trimmed	other	114.89	77.44	68.64	180.31	99.91	246.08	272.97	112.67
mmu-miR-219a-2-3p-1-1-A	21.77	0.83	ambiguous tail	A	0.1	0.1	0.1	3.76	6.4	28.03	0.1	30.88
mmu-miR-219a-2-3p-1-1-C	18.51	13.97	ambiguous tail	C	14.54	10.38	14.87	8.76	6.4	24.92	21.3	24.2
mmu-miR-219a-2-3p-2-0--	13.35	17.62	trimmed	other	20.36	8.78	8.01	11.27	11.53	13.5	39.69	15.02
mmu-miR-219a-2-3p-3-0--	15.6	13.74	trimmed	other	20.36	7.18	0.1	18.78	7.69	24.92	22.26	14.19
mmu-miR-219a-5p-1-2-0-0--	4.82	4.7	canonical	other	10.91	0.8	0.1	0.1	2.56	1.04	11.62	10.85
mmu-miR-219a-5p-1-2-0-1-T	11.59	11.46	NT tail	U	9.45	9.58	14.87	5.01	7.69	6.23	18.39	20.87
mmu-miR-219a-5p-1-2-0-2-TG	16.46	12.79	NT tail	other	16.72	7.18	1.14	5.01	25.62	6.23	33.88	17.53
mmu-miR-219a-5p-1-2-1-0--	1.48	1.65	trimmed	other	0.73	2.39	1.14	0.1	2.56	1.04	3.87	0.83
mmu-miR-219a-5p-1-2-7-8-TAATTCTT	17.3	13.32	ambiguous tail	other	8.73	7.98	12.58	15.03	20.49	19.73	22.26	11.68
mmu-miR-21a-3p-1-0--	60.69	86.93	trimmed	other	101.8	71.05	86.94	53.84	46.11	59.18	121	76.78
mmu-miR-22-3p-0-0--	73273	73062.7	canonical	other	66003.4	68360	59449	86623.1	59961.1	96764	84877.7	63094
mmu-miR-22-3p-0-1-A	134.34	37.82	NT tail	A	49.45	37.52	20.59	35.06	90.95	186.89	46.46	125.19
mmu-miR-22-3p-0-1-T	78.07	80.16	ambiguous tail	U	65.44	83.02	74.36	88.9	71.73	100.71	89.06	61.76
mmu-miR-22-3p-1-0--	728.31	727.5	trimmed	other	562.09	653.81	624.62	867.72	393.24	1181.58	929.28	610.1
mmu-miR-22-3p-1-1-A	62.88	36.65	ambiguous tail	A	39.99	28.74	28.6	50.08	35.87	76.83	35.82	75.95
mmu-miR-22-3p-1-1-C	66.11	51.34	ambiguous tail	C	46.54	39.12	42.33	42.57	37.15	111.1	86.15	50.08
mmu-miR-22-3p-1-1-G	372.98	370.11	ambiguous tail	G	221.78	285.79	202.49	538.41	240.81	672.82	602.09	205.31
mmu-miR-22-3p-2-0--	646.37	896.86	trimmed	other	712.61	856.58	1076.5	1277.17	503.4	702.93	561.44	732.79
mmu-miR-22-3p-3-0--	487.09	334.54	trimmed	other	173.79	209.15	113.26	155.26	142.18	1006.11	1021.24	312.98
mmu-miR-22-3p-7-7-TAACTGT	19.67	14.82	ambiguous tail	other	12.36	15.17	0.1	21.29	14.09	29.07	25.17	15.86
mmu-miR-22-3p-8-8-GGAACTGT	31.46	28.39	ambiguous tail	other	22.54	39.12	19.45	25.04	21.78	42.57	35.82	30.05
mmu-miR-22-3p-9-9-GAGAACTGT	17.53	21.35	ambiguous tail	other	29.09	21.55	16.02	18.78	14.09	21.8	21.3	16.69
mmu-miR-22-5p-1-0--	24.84	44.03	trimmed	other	42.18	67.06	46.9	17.53	16.65	31.15	46.46	26.71
mmu-miR-22-5p-2-0--	28.15	29.02	trimmed	other	37.09	20.76	33.18	25.04	23.06	32.19	29.04	29.21
mmu-miR-22-5p-3-0--	3.37	2.51	trimmed	other	2.91	3.19	3.43	0.1	5.12	4.15	2.9	0.83
mmu-miR-221-3p-0-0--	1614.23	1678.91	canonical	other	2062.95	1915.92	1815.52	729.99	1222	2106.7	1870.17	1513.98
mmu-miR-221-3p-0-1-A	40.48	0.1	NT tail	A	0.1	0.1	0.1	0.1	38.43	52.95	0.1	30.05
mmu-miR-221-3p-0-1-T	732.41	888.93	NT tail	U	868.95	751.2	1014.73	1060.55	725	876.32	749.23	595.91
mmu-miR-221-3p-1-0--	2617.33	2951.1	trimmed	other	3399.46	3757.6	2962.95	1560.15	1665.19	3521.9	3075.32	2664.91
mmu-miR-221-3p-1-1-A	22.95	3.86	ambiguous tail	A	8.73	0.1	10.3	0.1	16.65	36.34	0.1	15.86
mmu-miR-221-3p-1-1-T	325.01	389.74	ambiguous tail	U	442.84	530.07	398.11	195.33	208.79	421.55	382.36	344.69
mmu-miR-221-3p-1-2-AT	17.53	0.1	ambiguous tail	AU	0.1	0.1	0.1	0.1	14.09	21.8	0.1	16.69
mmu-miR-221-3p-1-2-TT	41.86	51.76	ambiguous tail	UU	69.81	72.65	44.62	17.53	44.83	45.69	54.21	35.05
mmu-miR-221-3p-2-0--	942.4	1145.99	trimmed	other	969.3	1105.65	1297.29	996.69	527.74	1370.55	1361	928.92
mmu-miR-221-3p-2-1-A	30.07	12.95	ambiguous tail	A	18.18	25.55	10.3	0.1	21.78	42.57	10.65	25.87
mmu-miR-221-3p-2-1-C	11.21	9.1	ambiguous tail	C	8.73	19.16	0.1	0.1	5.12	13.5	17.42	15.02
mmu-miR-221-3p-3-0--	380.17	506.91	trimmed	other	461.02	507.72	541.11	411.95	197.26	579.37	612.74	363.89
mmu-miR-221-5p-0-0--	1054.46	749.4	canonical	other	852.23	653.01	797.37	708.7	1456.4	962.5	735.68	744.47
mmu-miR-221-5p-0-1-A	8.76	2.75	NT tail	A	1.45	5.59	2.29	2.5	10.25	9.34	1.94	6.68
mmu-miR-221-5p-0-1-T	31.23	16.08	NT tail	U	24.72	9.58	16.02	8.76	43.55	30.11	21.3	20.03
mmu-miR-221-5p-0-2-AT	7.95	1.85	NT tail	AU	2.91	0.1	1.14	5.01	12.81	5.19	0.1	5.84
mmu-miR-221-5p-1-0--	6.93	11.08	trimmed	other	13.82	11.97	2.29	13.77	7.69	7.27	13.55	5.84
mmu-miR-221-5p-1-1-A	15.67	2	ambiguous tail	A	3.64	0.1	1.14	1.25	15.37	16.61	3.87	15.02
mmu-miR-221-5p-2-0--	36.99	18.35	trimmed	other	26.18	8.78	16.02	17.53	23.06	69.57	23.23	18.36
mmu-miR-221-5p-3-0--	99.3	94.01	trimmed	other	109.07	83.02	91.52	75.13	78.14	120.44	111.32	99.32
mmu-miR-222-3p-0-0--	3031.17	3546.45	canonical	other	3759.41	3806.3	3835.82	4538.95	3781.27	1799.37	1791.76	3512.87
mmu-miR-222-3p-0-1-C	2277.44	2391.64	NT tail	C	2245.46	2502.67	2246.81	3469.63	2086.62	2068.29	1493.62	2677.43
mmu-miR-222-3p-0-1-T	112.11	140.17	NT tail	U	124.34	150.88	145.29	190.32	119.13	90.33	90.02	126.86
mmu-miR-222-3p-0-2-CA	75.91	6.73	NT tail	other	8.73	0.1	0.1	15.03	130.65	31.15	9.68	65.93
mmu-miR-222-3p-0-2-CC	60.85	62.36	NT tail	other	68.35	75.04	45.76	92.66	79.42	32.19	30.01	70.94
mmu-miR-222-3p-0-2-CT	1120.47	1351.35	NT tail	other	1274.71	1278.08	1457.45	1972.09	1393.64	879.44	774.4	1088.33
mmu-miR-222-3p-0-2-TT	18.87	31.93	NT tail	UU	34.9	48.7	33.18	22.54	24.34	15.57	20.33	16.69
mmu-miR-222-3p-0-3-CAT	73.91	2.32	NT tail	other	0.1	11.18	0.1	0.1	103.75	22.84	0.1	95.15
mmu-miR-222-3p-0-3-CTT	82.42	90.44	NT tail	other	98.89	113.36	88.09	97.67	88.38	69.57	54.21	89.3
mmu-miR-222-3p-1-0--	962.32	1136.07	trimmed	other	1112.55	1231.78	1252.68	1366.07	1040.11	637.51	717.28	1209.35
mmu-miR-222-3p-1-1-A	41.42	11.8	ambiguous tail	A	19.63	23.15	16.02	0.1	32.02	40.49	0.1	51.75
mmu-miR-222-3p-1-1-G	31.96	29.18	ambiguous tail	G	21.81	32.73	19.45	43.82	32.02	44.65	28.07	19.2
mmu-miR-222-3p-2-0--	685.6	767.26	trimmed	other	824.6	866.16	790.5	570.97	687.85	660.36	784.08	708.58
mmu-miR-222-3p-2-1-A	29.04	14.41	ambiguous tail	A	24.72	28.74	0.1	0.1	29.46	25.96	18.39	31.72
mmu-miR-222-3p-2-1-T	26.49	32.6	ambiguous tail	U	30.54	47.9	32.03	22.54	29.46	16.61	30.01	33.38
mmu-miR-222-3p-3-0--	172.45	168.09	trimmed	other	151.98	159.66	200.2	78.88	183.17	188.97	249.74	145.22
mmu-miR-222-3p-3-1-A	34.11	44.5	ambiguous tail	A	44.36	36.72	67.5	40.07	30.74	41.53	33.88	30.05
mmu-miR-222-5p-0-0--	11.83	16.13	canonical	other	4.36	3.19	21.74	30.05	5.12	22.84	21.3	7.51
mmu-miR-222-5p-0-1-T	5.29	10.62	NT tail	U	13.82	9.58	18.3	7.51	2.56	12.46	3.87	0.83
mmu-miR-222-5p-1-0--	4.25	6.72	trimmed	other	2.91	3.99	1.14	18.78	2.56	9.34	6.78	0.83
mmu-miR-223-3p-0-0--	2.1	5.29	canonical	other	8.73	5.59	2.29	5.01	2.56	2.08	4.84	1.67
mmu-miR-223-3p-3-0--	8.61	5.89	trimmed	other	8.73	7.98	8.01	3.76	17.93	6.23	0.97	1.67
mmu-miR-224-5p-0-1-T	3.5	1.17	NT tail	U	0.73	2.39	0.1	2.5	3.84	4.15	0.1	2.5
mmu-miR-25-3p-0-0--	1227.96	1224.22	canonical	other	1225.99	1182.28	1423.13	1140.68	677.61	1740.18	1149.01	1266.1
mmu-miR-25-3p-0-1-A	52.23	26.18	NT tail	A	21.81	23.95	17.16	35.06	42.27	68.53	32.91	45.9
mmu-miR-25-3p-0-1-T	47.17	54.74	NT tail	U	48.72	55.08	84.66	51.34	23.06	55.03	33.88	63.43
mmu-miR-25-3p-0-2-TA	5.5	5.29	NT tail	UA	3.64	6.39	12.58	3.76	2.56	7.27	0.1	6.68
mmu-miR-25-3p-0-2-TT	16.34	17.86	NT tail	UU	16.72	17.56	12.58	16.28	5.12	28.03	26.14	15.86
mmu-miR-25-3p-1-0--	92.04	69.41	trimmed	other	33.45	70.25	76.65	56.35	53.8	150.55	110.35	71.78
mmu-miR-25-3p-1-1-G	15.55	15.95	ambiguous tail	G	10.91	11.18	13.73	18.78	3.84	39.46	25.17	3.34
mmu-miR-25-3p-1-1-T	36.4	42.73	ambiguous tail	U	37.09	43.11	52.62	15.03	23.06	47.76	65.82	38.39
mmu-miR-25-3p-2-0--	958.86	968.75	trimmed	other	924.94	868.55	807.66	1056.79	685.29	1261.53	1185.79	929.76
mmu-miR-25-3p-2-1-T	4.82	2.45	ambiguous tail	U	5.09	0.1	6.86	0.1	3.84	7.27	0.1	3.34
mmu-miR-25-3p-3-0--	154.97	137.19	trimmed	other	95.26	75.84	93.81	200.34	81.98	292.8	220.7	90.14
mmu-miR-25-5p-0-0--	5.52	5.65	canonical	other	1.45	7.98	6.86	10.02	12.81	2.08	1.94	1.67
mmu-miR-25-5p-0-1-T	6.19	7.79	NT tail	U	4.36	4.79	8.01	15.03	10.25	4.15	6.78	4.17
mmu-miR-26a-2-3p-0-0--	8.86	10.7	canonical	other	15.27	13.57	12.58	6.26	6.4	13.5	5.81	6.68
mmu-miR-26a-5p-1-2-0-0--	641233	625625	canonical	other	483321	486055	519447	652647	561566	900268	986655	461863
mmu-miR-26a-5p-1-2-0-1-A	1180.25	292.76	NT tail	A	236.33	236.3	229.94	176.55	692.98	1902.16	584.67	945.61
mmu-miR-26a-5p-1-2-0-1-C	570.37	570.19	NT tail	C	455.93	480.58	555.98	607.28	330.48	834.79	751.16	545.84
mmu-miR-26a-5p-1-2-0-1-G	94.58	48.35	NT tail	G	29.09	41.51	25.17	58.85	53.8	172.36	87.12	57.59
mmu-miR-26a-5p-1-2-0-1-T	16122.5	18789.7	NT tail	U	16457.8	16542.4	16787	17460.9	9179.06	26122.5	26700.2	13065.8
mmu-miR-26a-5p-1-2-0-2-AA	36.94	1.53	NT tail	AA	7.27	0.1	0.1	0.1	37.15	39.46	0.1	34.22
mmu-miR-26a-5p-1-2-0-2-AG	19.85	0.1	NT tail	other	0.1	0.1	0.1	0.1	17.93	24.92	0.1	16.69
mmu-miR-26a-5p-1-2-0-2-AT	202.54	49.75	NT tail	AU	48.72	46.3	37.75	58.85	169.08	269.96	57.11	168.59
mmu-miR-26a-5p-1-2-0-2-CT	164.09	127.24	NT tail	other	106.89	96.59	101.82	131.47	157.55	212.85	199.41	121.85
mmu-miR-26a-5p-1-2-0-2-GA	26.32	0.1	NT tail	other	0.1	0.1	0.1	0.1	21.78	40.49	0.1	16.69
mmu-miR-26a-5p-1-2-0-2-GT	23.18	0.1	NT tail	other	0.1	0.1	0.1	0.1	17.93	29.07	0.1	22.53
mmu-miR-26a-5p-1-2-0-2-TA	162.85	32.95	NT tail	UA	38.54	22.35	28.6	28.8	98.63	230.5	46.46	159.41
mmu-miR-26a-5p-1-2-0-2-TC	95.32	78.77	NT tail	other	78.53	51.89	53.77	96.41	79.42	133.94	113.26	72.61
mmu-miR-26a-5p-1-2-0-2-TT	2095.7	2496.37	NT tail	UU	2124.76	2213.69	2271.98	2677.04	1553.75	2953.95	3194.39	1779.39
mmu-miR-26a-5p-1-2-0-3-AGA	19.58	0.1	NT tail	other	0.1	0.1	0.1	0.1	19.21	27	0.1	12.52
mmu-miR-26a-5p-1-2-0-3-ATT	284.49	54.5	NT tail	AUU	73.44	49.49	41.18	42.57	315.11	297.99	65.82	240.37
mmu-miR-26a-5p-1-2-0-3-CTT	17.31	21.63	NT tail	other	10.91	16.76	17.16	40.07	12.81	24.92	23.23	14.19
mmu-miR-26a-5p-1-2-0-3-TTA	13.79	0.1	NT tail	UUA	0.1	0.1	0.1	0.1	15.37	17.65	0.1	8.35
mmu-miR-26a-5p-1-2-0-3-TTT	222.25	263.74	NT tail	UUU	250.14	226.72	258.54	296.75	175.49	326.03	286.53	165.25
mmu-miR-26a-5p-1-2-1-0--	87071.8	90270.8	trimmed	other	62208.3	64038.8	71967.7	88359.9	66375.9	137610	164779	57230.1
mmu-miR-26a-5p-1-2-1-1-A	1557.68	1371.04	ambiguous tail	A	992.57	1103.25	926.64	833.91	824.91	2717.22	2998.85	1130.9
mmu-miR-26a-5p-1-2-1-1-C	930.1	550.19	ambiguous tail	C	162.88	143.69	168.17	215.37	143.46	2515.79	2060.86	131.03
mmu-miR-26a-5p-1-2-1-1-G	13461.1	12079.1	ambiguous tail	G	4315.68	6574	4375.79	13673.2	5826.9	31595.4	31457	2961.2
mmu-miR-26a-5p-1-2-1-2-AA	45.32	19.63	ambiguous tail	AA	18.91	16.76	21.74	0.1	35.87	55.03	40.66	45.07
mmu-miR-26a-5p-1-2-1-2-AG	17.23	0.1	ambiguous tail	other	0.1	0.1	0.1	0.1	12.81	28.03	0.1	10.85
mmu-miR-26a-5p-1-2-1-2-AT	109.2	101.26	ambiguous tail	AU	77.08	83.02	83.51	61.35	66.61	181.7	201.34	79.29
mmu-miR-26a-5p-1-2-1-2-CT	24.53	23.64	ambiguous tail	other	21.81	19.16	33.18	15.03	28.18	18.69	29.04	26.71
mmu-miR-26a-5p-1-2-1-3-ATT	44.11	33.43	ambiguous tail	AUU	33.45	24.75	32.03	27.55	34.58	64.37	49.37	33.38
mmu-miR-26a-5p-1-2-2-0--	8433.94	9017.92	trimmed	other	4517.1	5954.52	4682.38	6447.18	3553.27	17474.5	23488.4	4274.04
mmu-miR-26a-5p-1-2-2-1-A	645.17	452.24	ambiguous tail	A	248.69	386.38	331.76	277.97	352.25	1135.9	1016.4	447.35
mmu-miR-26a-5p-1-2-2-1-T	335.39	339.12	ambiguous tail	U	156.34	222.73	185.33	169.04	187.01	657.24	962.19	161.91
mmu-miR-26a-5p-1-2-2-2-AA	180.82	128.15	ambiguous tail	AA	54.54	96.59	73.22	26.29	102.47	319.8	390.1	120.18
mmu-miR-26a-5p-1-2-2-2-AG	45.24	35.66	ambiguous tail	other	13.82	13.57	14.87	15.03	16.65	100.71	121	18.36
mmu-miR-26a-5p-1-2-2-2-AT	148.19	115.76	ambiguous tail	AU	69.08	58.28	52.62	136.48	143.46	211.81	262.33	89.3
mmu-miR-26a-5p-1-2-2-2-TT	63.1	77.25	ambiguous tail	UU	68.35	79.03	67.5	30.05	44.83	111.1	141.33	33.38
mmu-miR-26a-5p-1-2-2-3-AAA	50.7	36.1	ambiguous tail	AAA	19.63	33.53	34.32	0.1	43.55	76.83	92.93	31.72
mmu-miR-26a-5p-1-2-3-0--	2879.98	2929.31	trimmed	other	1819.35	2246.42	1633.63	2725.87	1056.76	5772.93	6221.31	1810.27
mmu-miR-26a-5p-1-2-3-1-A	156.52	81.95	ambiguous tail	A	61.08	61.47	66.35	68.87	65.33	290.72	151.98	113.51
mmu-miR-26a-5p-1-2-3-1-T	328.37	336.32	ambiguous tail	U	257.41	280.2	216.22	279.22	131.93	609.48	648.56	243.71
mmu-miR-26a-5p-1-2-3-3-ACT	35.49	38.77	ambiguous tail	other	31.27	29.54	48.05	37.56	29.46	39.46	47.43	37.56
mmu-miR-26a-5p-1-2-3-3-CCT	16.23	15.17	ambiguous tail	other	11.63	7.98	12.58	0.1	16.65	22.84	43.56	9.18
mmu-miR-26a-5p-1-2-3-3-TCT	85.67	66.44	ambiguous tail	other	31.99	39.12	42.33	63.86	74.29	144.32	154.88	38.39
mmu-miR-26a-5p-1-2-4-4-TGCT	94.15	83.86	ambiguous tail	other	39.99	44.7	37.75	62.61	60.2	167.17	234.25	55.08
mmu-miR-26a-5p-1-2-5-5-CGGCT	14.48	11.16	ambiguous tail	other	8	0.1	14.87	12.52	15.37	19.73	20.33	8.35
mmu-miR-26a-5p-1-2-5-5-GGGCT	126.46	138.56	ambiguous tail	other	141.07	113.36	149.86	102.67	87.1	183.78	185.86	108.5
mmu-miR-26a-5p-1-2-6-6-AAGGCT	93.04	98.13	ambiguous tail	other	95.26	87.01	88.09	66.36	73.01	140.17	153.91	65.93
mmu-miR-26a-5p-1-2-6-6-CAGGCT	85.82	96.4	ambiguous tail	other	81.44	87.81	93.81	77.63	67.89	106.94	141.33	82.63
mmu-miR-26a-5p-1-2-7-7-GTAGGCT	116.55	110.69	ambiguous tail	other	90.17	90.21	109.82	85.14	79.42	169.24	178.11	100.99
mmu-miR-26a-5p-1-2-7-7-TTAGGCT	55.99	63.01	ambiguous tail	other	61.81	52.69	44.62	38.82	28.18	91.37	117.13	48.41
mmu-miR-26a-5p-1-2-8-8-AATAGGCT	17.78	17.45	ambiguous tail	other	18.18	12.77	18.3	13.77	20.49	22.84	24.2	10.02
mmu-miR-26a-5p-1-2-8-8-CATAGGCT	29.29	20.65	ambiguous tail	other	10.91	12.77	0.1	17.53	21.78	51.91	61.95	14.19
mmu-miR-26a-5p-1-2-8-8-TATAGGCT	99.75	83.2	ambiguous tail	other	53.81	55.08	34.32	58.85	58.92	182.74	213.93	57.59
mmu-miR-26a-5p-1-2-9-9-AGATAGGCT	20.38	22.21	ambiguous tail	other	15.27	27.14	24.02	17.53	21.78	17.65	27.1	21.7
mmu-miR-26a-5p-1-2-9-9-CGATAGGCT	22.67	21.3	ambiguous tail	other	14.54	15.97	24.02	20.03	16.65	36.34	31.94	15.02
mmu-miR-26a-5p-1-2-9-9-TGATAGGCT	99.79	75.54	ambiguous tail	other	47.27	43.91	41.18	70.12	55.08	181.7	175.21	62.6
mmu-miR-26b-3p-0-0--	15.87	17.37	canonical	other	9.45	11.97	28.6	30.05	30.74	9.34	6.78	7.51
mmu-miR-26b-3p-1-0--	23	25.7	trimmed	other	13.09	23.15	28.6	50.08	29.46	22.84	13.55	16.69
mmu-miR-26b-5p-0-0--	1380.04	1402.01	canonical	other	978.75	1118.42	711.57	811.38	525.18	2783.67	3389.92	831.27
mmu-miR-26b-5p-0-1-A	124.37	101.2	NT tail	A	69.08	74.24	26.31	57.6	38.43	263.73	278.78	70.94
mmu-miR-26b-5p-0-1-T	10840.7	10583.9	ambiguous tail	U	7501.36	8279.97	5158.28	4552.72	4191.16	22582.9	27427.2	5747.96
mmu-miR-26b-5p-0-2-AA	10.33	3.56	NT tail	AA	0.1	0.1	0.1	0.1	7.69	12.46	17.42	10.85
mmu-miR-26b-5p-0-2-TA	293.6	162.2	NT tail	UA	121.44	141.3	73.22	122.71	162.68	537.84	352.35	180.28
mmu-miR-26b-5p-0-2-TC	18.03	19.34	NT tail	other	18.18	16.76	11.44	21.29	16.65	24.92	29.04	12.52
mmu-miR-26b-5p-0-2-TT	367.46	373.67	NT tail	UU	343.22	380.79	216.22	289.24	170.36	658.28	638.88	273.75
mmu-miR-26b-5p-1-0--	298.47	309.4	trimmed	other	228.33	228.31	185.33	264.2	137.06	589.75	640.81	168.59
mmu-miR-26b-5p-1-1-C	19.83	20.05	ambiguous tail	C	13.82	15.17	11.44	16.28	8.97	36.34	43.56	14.19
mmu-miR-26b-5p-1-2-CT	199.05	182.54	ambiguous tail	other	125.07	144.49	132.7	189.07	120.41	354.06	321.37	122.69
mmu-miR-27a-5p-1-0--	5.83	5.13	trimmed	other	3.64	0.8	9.15	6.26	7.69	3.11	5.81	6.68
mmu-miR-27b-5p-0-0--	28.15	33.83	canonical	other	25.45	26.34	30.89	52.59	16.65	47.76	33.88	20.03
mmu-miR-27b-5p-0-1-A	3.69	3.21	ambiguous tail	A	2.18	2.39	3.43	1.25	1.28	3.11	6.78	6.68
mmu-miR-27b-5p-0-1-T	8.93	7.69	NT tail	U	5.82	2.39	14.87	3.76	5.12	8.31	11.62	13.35
mmu-miR-27b-5p-0-3-AGT	4.42	3.54	ambiguous tail	other	7.27	1.6	3.43	2.5	5.12	3.11	2.9	5.01
mmu-miR-28a-3p-0-0--	57.76	44.81	canonical	other	42.9	46.3	58.34	30.05	30.74	84.1	46.46	58.42
mmu-miR-28a-3p-0-1-A	15.1	12.67	NT tail	A	8.73	11.97	16.02	15.03	5.12	21.8	11.62	18.36
mmu-miR-28a-3p-0-1-T	8.96	7.58	NT tail	U	2.91	12.77	6.86	3.76	1.28	11.42	11.62	14.19
mmu-miR-28a-3p-0-2-AA	2.31	0.23	NT tail	AA	0.73	0.1	0.1	0.1	2.56	1.04	0.1	3.34
mmu-miR-28a-3p-0-2-AT	2.79	0.77	NT tail	AU	0.1	1.6	0.1	0.1	2.56	4.15	1.94	1.67
mmu-miR-28a-3p-1-0--	13.51	13.81	trimmed	other	5.09	14.37	11.44	18.78	7.69	22.84	19.36	10.02
mmu-miR-296-3p-0-0--	6.47	6.22	canonical	other	7.27	3.99	9.15	8.76	10.25	4.15	1.94	5.01
mmu-miR-296-3p-0-1-T	4.43	4.11	NT tail	U	8	0.8	2.29	7.51	7.69	3.11	1.94	2.5
mmu-miR-296-3p-0-3-ATT	14.04	1.12	NT tail	AUU	0.73	2.39	1.14	1.25	28.18	7.27	0.1	6.68
mmu-miR-296-5p-0-0--	511.34	560.6	canonical	other	780.97	676.96	703.56	459.53	778.8	152.63	181.98	602.59
mmu-miR-296-5p-0-1-A	22.31	3.69	NT tail	A	8.73	5.59	1.14	0.1	26.9	8.31	2.9	31.72
mmu-miR-296-5p-0-1-T	30.09	44.4	NT tail	U	52.36	47.9	75.5	28.8	44.83	10.38	17.42	35.05
mmu-miR-296-5p-1-0--	125.46	120.32	trimmed	other	129.43	106.97	171.6	136.48	204.95	61.26	57.11	110.17
mmu-miR-296-5p-1-1-C	6.85	9.73	ambiguous tail	C	30.54	13.57	0.1	2.5	14.09	3.11	1.94	3.34
mmu-miR-296-5p-1-1-G	3	3.72	ambiguous tail	G	6.54	4.79	3.43	3.76	1.28	1.04	0.1	6.68
mmu-miR-296-5p-2-0--	19.28	21.57	trimmed	other	26.9	31.93	22.88	21.29	21.78	5.19	4.84	30.88
mmu-miR-296-5p-3-0--	3.64	4.41	trimmed	other	2.91	6.39	4.58	6.26	3.84	2.08	1.94	5.01
mmu-miR-298-3p-0-0--	3.59	2.15	canonical	other	2.91	1.6	1.14	5.01	6.4	1.04	0.1	3.34
mmu-miR-298-5p-0-0--	1356.36	1634.94	canonical	other	1289.98	956.36	1683.96	2660.76	1939.31	1207.54	1583.64	922.24
mmu-miR-298-5p-0-1-T	172.29	175.89	NT tail	U	138.16	107.77	168.17	280.48	211.35	166.13	184.89	139.38
mmu-miR-298-5p-0-3-TTT	26.17	33.74	NT tail	UUU	34.18	28.74	27.46	55.09	33.3	17.65	23.23	27.54
mmu-miR-298-5p-1-0--	1599.8	1917.28	trimmed	other	1572.12	1143.17	1800.65	3319.38	2477.3	1175.35	1751.1	1146.75
mmu-miR-298-5p-1-1-T	209.65	260.57	ambiguous tail	U	218.87	166.84	276.85	394.42	263.87	184.82	245.87	180.28
mmu-miR-298-5p-2-0--	754.6	1304.25	trimmed	other	938.76	696.12	1362.5	2189.96	903.05	712.27	1333.9	648.49
mmu-miR-298-5p-2-1-T	62.12	164.85	ambiguous tail	U	103.98	79.03	163.59	321.8	94.79	49.84	155.85	41.73
mmu-miR-298-5p-2-3-TTT	10.21	19.42	ambiguous tail	UUU	14.54	7.18	28.6	31.3	10.25	14.54	15.49	5.84
mmu-miR-298-5p-3-0--	95.09	158.81	trimmed	other	167.97	129.32	201.34	141.49	78.14	98.64	153.91	108.5
mmu-miR-298-5p-3-1-A	6.8	0.1	ambiguous tail	A	0.1	0.1	0.1	0.1	7.69	5.19	0.1	7.51
mmu-miR-298-5p-3-1-T	20.3	41.4	ambiguous tail	U	26.18	23.95	59.49	53.84	21.78	20.77	43.56	18.36
mmu-miR-299a-5p-299b-5p-0-0--	13.9	28.78	canonical	other	31.99	37.52	43.47	12.52	11.53	17.65	18.39	12.52
mmu-miR-299a-5p-299b-5p-1-0--	7.56	12.91	trimmed	other	19.63	23.15	3.43	12.52	8.97	10.38	5.81	3.34
mmu-miR-299a-5p-299b-5p-2-0--	26.73	20.85	trimmed	other	18.18	23.95	27.46	16.28	35.87	25.96	18.39	18.36
mmu-miR-299b-3p-299a-3p-0-3-GCT	17.04	18.03	NT tail	other	13.09	13.57	19.45	15.03	5.12	25.96	29.04	20.03
mmu-miR-29a-3p-0-0--	2821.96	3197.39	canonical	other	3253.3	3629.87	3431.99	2748.41	3021.69	2871.93	2923.35	2572.27
mmu-miR-29a-3p-0-1-A	265.85	237.04	NT tail	A	239.96	273.82	224.22	230.39	258.75	291.76	216.83	247.04
mmu-miR-29a-3p-0-1-C	60	76.72	NT tail	C	70.53	98.99	82.37	60.1	66.61	67.49	71.63	45.9
mmu-miR-29a-3p-0-1-G	61.15	13.64	NT tail	G	8.73	12.77	12.58	13.77	47.39	85.14	20.33	50.91
mmu-miR-29a-3p-0-1-T	1154.38	1330.25	NT tail	U	1191.08	1540.72	1424.28	1184.51	976.06	1280.22	1310.67	1206.85
mmu-miR-29a-3p-0-2-AG	22.9	0.1	NT tail	other	0.1	0.1	0.1	0.1	25.62	23.88	0.1	19.2
mmu-miR-29a-3p-1-0--	6099.45	5946.61	trimmed	other	5616.57	7028.23	6310.29	4907.07	5887.1	6023.16	5870.89	6388.11
mmu-miR-29a-3p-1-1-G	35.74	33.31	ambiguous tail	G	22.54	53.49	32.03	18.78	20.49	59.18	39.69	27.54
mmu-miR-29a-3p-1-1-T	186.62	215.41	ambiguous tail	U	183.97	241.88	235.66	180.31	152.43	234.65	235.22	172.76
mmu-miR-29a-3p-2-0--	1426.33	1389.95	trimmed	other	1136.55	1480.05	1357.92	1354.8	1222	1607.28	1620.42	1449.72
mmu-miR-29a-3p-2-1-A	31.29	32.65	ambiguous tail	A	28.36	39.92	43.47	13.77	32.02	25.96	37.75	35.89
mmu-miR-29a-3p-2-2-AA	23.62	21.8	ambiguous tail	AA	25.45	24.75	48.05	0.1	26.9	15.57	10.65	28.38
mmu-miR-29a-3p-3-0--	426.35	469.95	trimmed	other	326.49	366.42	483.91	502.1	304.86	571.06	670.82	403.12
mmu-miR-29a-3p-3-1-A	86.8	28.46	ambiguous tail	A	19.63	23.95	20.59	20.03	76.86	101.75	58.08	81.79
mmu-miR-29a-5p-0-0--	5.42	2.83	canonical	other	4.36	3.19	4.58	0.1	1.28	8.31	1.94	6.68
mmu-miR-29a-5p-0-1-A	7.31	2.95	NT tail	A	2.18	6.39	0.1	1.25	2.56	5.19	4.84	14.19
mmu-miR-29a-5p-0-3-AGT	9.05	4.76	NT tail	other	7.27	7.18	3.43	0.1	3.84	12.46	5.81	10.85
mmu-miR-29a-5p-1-0--	3.35	3.17	trimmed	other	2.91	8.78	1.14	0.1	2.56	4.15	2.9	3.34
mmu-miR-29b-2-5p-1-0--	6.97	11.04	trimmed	other	10.18	10.38	22.88	5.01	3.84	10.38	6.78	6.68
mmu-miR-29b-2-5p-2-0--	8.83	7.33	trimmed	other	12.36	7.98	8.01	2.5	2.56	11.42	5.81	12.52
mmu-miR-29b-2-5p-3-1-T	6.63	5.5	ambiguous tail	U	4.36	11.97	2.29	5.01	5.12	11.42	3.87	3.34
mmu-miR-29c-5p-0-0--	3.21	4.79	canonical	other	8.73	5.59	2.29	2.5	2.56	6.23	4.84	0.83
mmu-miR-29c-5p-0-1-A	6.02	4.9	ambiguous tail	A	10.18	3.99	3.43	0.1	6.4	4.15	6.78	7.51
mmu-miR-29c-5p-0-1-T	6.49	5.97	NT tail	U	4.36	4.79	13.73	5.01	12.81	4.15	1.94	2.5
mmu-miR-29c-5p-0-3-AGA	6.62	6.46	ambiguous tail	other	5.82	8.78	2.29	12.52	2.56	7.27	2.9	10.02
mmu-miR-29c-5p-1-0--	7.62	13.78	trimmed	other	13.82	22.35	9.15	10.02	7.69	9.34	13.55	5.84
mmu-miR-300-3p-0-0--	1219.42	1497.47	canonical	other	1648.47	1535.93	1801.8	1283.43	1260.42	1046.6	1217.74	1351.23
mmu-miR-300-3p-0-1-A	2540.16	175.42	NT tail	A	258.14	182.01	165.88	166.53	3595.54	1474.38	104.54	2550.57
mmu-miR-300-3p-0-1-T	839.89	969.87	NT tail	U	1042.74	1075.31	1135.99	857.7	983.75	605.33	737.61	930.59
mmu-miR-300-3p-1-0--	1142.68	1493.78	trimmed	other	1580.84	1507.19	1653.08	1437.44	1207.91	1072.56	1290.34	1147.59
mmu-miR-300-3p-1-1-T	59.56	81.72	ambiguous tail	U	93.8	94.2	101.82	41.32	52.52	56.07	77.44	70.11
mmu-miR-300-3p-2-0--	22141.4	25157	trimmed	other	24830.3	22173.6	28898.5	25761.2	27707.5	18650.9	24121.5	20065.7
mmu-miR-300-3p-2-2-GT	168.28	191.15	ambiguous tail	other	224.69	220.33	202.49	164.03	170.36	130.83	144.23	203.64
mmu-miR-300-3p-3-0--	336.48	347.54	trimmed	other	326.49	265.83	426.71	300.51	452.16	266.84	418.17	290.44
mmu-miR-300-3p-3-1-G	27.27	42.79	ambiguous tail	G	21.09	35.13	37.75	63.86	17.93	40.49	56.14	23.37
mmu-miR-300-5p-0-0--	2.88	2.54	canonical	other	1.45	4.79	3.43	0.1	3.84	3.11	2.9	1.67
mmu-miR-300-5p-0-2-GT	2.1	2.94	ambiguous tail	other	7.27	2.39	0.1	0.1	2.56	2.08	4.84	1.67
mmu-miR-301a-3p-0-0--	406.53	430.32	canonical	other	427.57	322.51	268.84	341.83	345.85	633.36	790.85	240.37
mmu-miR-301a-3p-0-1-T	32.87	32.67	NT tail	U	29.81	39.12	22.88	33.81	39.71	32.19	37.75	26.71
mmu-miR-301a-3p-0-2-AT	3.3	1.64	ambiguous tail	AU	0.73	3.19	0.1	1.25	5.12	3.11	2.9	1.67
mmu-miR-301a-3p-0-3-ATT	23.89	25.94	NT tail	AUU	38.54	19.16	8.01	17.53	29.46	32.19	46.46	10.02
mmu-miR-301a-3p-1-0--	6.71	8.26	trimmed	other	7.27	7.98	4.58	5.01	6.4	10.38	16.46	3.34
mmu-miR-301b-3p-0-0--	34.68	33.23	canonical	other	31.27	31.13	26.31	21.29	43.55	48.8	56.14	11.68
mmu-miR-3057-5p-0-0--	17.8	21.93	canonical	other	13.09	24.75	3.43	53.84	21.78	16.61	14.52	15.02
mmu-miR-3057-5p-0-1-G	15.69	15.29	ambiguous tail	G	6.54	23.95	5.72	23.79	8.97	15.57	16.46	22.53
mmu-miR-3057-5p-0-2-GG	15.04	16.45	ambiguous tail	other	6.54	13.57	17.16	27.55	15.37	19.73	17.42	10.02
mmu-miR-3057-5p-0-2-GT	5.16	9.85	NT tail	other	1.45	7.98	17.16	18.78	2.56	6.23	3.87	6.68
mmu-miR-3057-5p-1-0--	7.89	14.51	trimmed	other	10.18	17.56	11.44	27.55	5.12	5.19	5.81	13.35
mmu-miR-3057-5p-3-0--	14.77	20.66	trimmed	other	3.64	8.78	26.31	41.32	8.97	27	23.23	8.35
mmu-miR-3057-5p-4-1-A	8.59	5.36	ambiguous tail	A	4.36	3.19	2.29	15.03	6.4	9.34	1.94	10.02
mmu-miR-3059-5p-0-0--	299	219.36	canonical	other	282.14	213.15	217.36	161.52	477.78	209.74	222.64	209.49
mmu-miR-3059-5p-0-1-A	43.73	33.26	NT tail	A	49.45	40.71	29.74	33.81	57.64	21.8	12.58	51.75
mmu-miR-3059-5p-0-1-G	253.6	201.38	ambiguous tail	G	248.69	185.21	226.51	242.91	370.19	127.71	103.58	262.9
mmu-miR-3059-5p-0-1-T	34.13	27.86	NT tail	U	38.54	26.34	24.02	30.05	47.39	16.61	20.33	38.39
mmu-miR-3059-5p-0-2-GT	4.09	2.13	ambiguous tail	other	4.36	3.19	0.1	0.1	7.69	2.08	2.9	2.5
mmu-miR-3059-5p-1-0--	541.51	428.43	trimmed	other	467.56	410.33	509.08	508.36	844.13	340.56	246.84	439.84
mmu-miR-3059-5p-1-1-A	55.23	36.29	ambiguous tail	A	46.54	45.5	24.02	45.08	97.35	20.77	20.33	47.57
mmu-miR-3059-5p-2-0--	1015.98	770.05	trimmed	other	630.45	595.53	978.12	1145.69	1740.77	575.22	500.45	731.95
mmu-miR-3059-5p-2-1-A	45.3	18.99	ambiguous tail	A	13.82	23.15	41.18	10.02	88.38	12.46	6.78	35.05
mmu-miR-3059-5p-2-1-T	32.46	27.13	ambiguous tail	U	31.27	14.37	50.34	21.29	47.39	20.77	18.39	29.21
mmu-miR-3059-5p-2-2-TA	10.73	4.03	ambiguous tail	UA	7.27	0.1	6.86	0.1	12.81	5.19	5.81	14.19
mmu-miR-3059-5p-3-0--	204.89	164.64	trimmed	other	130.16	97.39	208.21	265.45	347.13	121.48	121.97	146.06
mmu-miR-3059-5p-3-1-A	25.68	8.13	ambiguous tail	A	8.73	9.58	9.15	11.27	33.3	18.69	1.94	25.04
mmu-miR-3059-5p-3-1-T	13.92	12.48	ambiguous tail	U	9.45	11.97	18.3	18.78	21.78	12.46	3.87	7.51
mmu-miR-3061-3p-0-0--	42.46	38.01	canonical	other	31.27	39.92	20.59	57.6	38.43	32.19	40.66	56.75
mmu-miR-3061-3p-0-1-A	4.82	0.8	NT tail	A	2.91	0.8	0.1	0.1	3.84	3.11	0.1	7.51
mmu-miR-3061-3p-0-1-T	24.21	25.12	NT tail	U	25.45	25.55	16.02	36.31	25.62	27	22.26	20.03
mmu-miR-3061-3p-1-0--	5.58	10.41	trimmed	other	6.54	10.38	9.15	16.28	2.56	4.15	9.68	10.02
mmu-miR-3061-5p-0-1-T	4.34	7.71	ambiguous tail	U	10.18	7.18	4.58	5.01	5.12	6.23	11.62	1.67
mmu-miR-3061-5p-1-0--	23.93	24.8	trimmed	other	24	16.76	24.02	26.29	32.02	19.73	32.91	20.03
mmu-miR-3066-5p-0-1-T	7.63	4.25	ambiguous tail	U	2.91	0.1	0.1	7.51	1.28	16.61	10.65	5.01
mmu-miR-3068-3p-0-0--	35.44	47.14	canonical	other	66.17	40.71	30.89	26.29	23.06	41.53	71.63	41.73
mmu-miR-3068-3p-0-1-T	6.15	9.12	NT tail	U	12.36	6.39	6.86	11.27	5.12	8.31	8.71	5.01
mmu-miR-3068-3p-1-0--	27.02	24.35	trimmed	other	25.45	21.55	19.45	17.53	20.49	32.19	37.75	28.38
mmu-miR-3068-3p-1-1-T	18.78	22.83	ambiguous tail	U	24.72	19.16	24.02	28.8	29.46	9.34	17.42	17.53
mmu-miR-3068-5p-0-0--	37.63	40.62	canonical	other	29.09	47.1	24.02	22.54	23.06	66.45	80.34	23.37
mmu-miR-3069-3p-0-0--	2.76	3.16	canonical	other	0.1	2.39	9.15	1.25	6.4	1.04	2.9	0.83
mmu-miR-3069-3p-1-1-T	22.1	25.8	ambiguous tail	U	27.63	14.37	40.04	15.03	12.81	30.11	31.94	23.37
mmu-miR-3070-5p-1-2-2-0--	1.76	1.41	trimmed	other	0.1	2.39	0.1	2.5	2.56	1.04	1.94	1.67
mmu-miR-3072-3p-0-0--	67.99	43.02	canonical	other	44.36	69.45	45.76	40.07	137.06	13.5	15.49	53.42
mmu-miR-3072-3p-0-1-T	6.2	2.12	ambiguous tail	U	1.45	3.19	4.58	1.25	11.53	2.08	0.1	5.01
mmu-miR-3074-1-3p-0-0--	1.05	1.79	canonical	other	2.18	3.19	0.1	2.5	1.28	1.04	0.97	0.83
mmu-miR-3074-5p-1-2-0-0--	3.07	8.44	canonical	other	4.36	15.17	10.3	7.51	2.56	4.15	4.84	2.5
mmu-miR-3078-5p-0-0--	191.26	184.37	canonical	other	205.79	190	204.78	212.86	279.24	105.91	108.42	188.62
mmu-miR-3078-5p-0-1-T	2.38	1.37	ambiguous tail	U	2.91	1.6	0.1	1.25	2.56	2.08	0.97	2.5
mmu-miR-3078-5p-1-0--	7.55	9.83	trimmed	other	18.18	7.98	8.01	6.26	6.4	6.23	8.71	10.02
mmu-miR-3078-5p-1-1-G	1.05	0.94	ambiguous tail	G	0.73	0.8	1.14	0.1	1.28	1.04	1.94	0.83
mmu-miR-3082-3p-0-0--	47.1	44.01	canonical	other	39.27	47.9	73.22	32.56	56.36	41.53	27.1	43.4
mmu-miR-3082-3p-0-1-T	77.05	41.51	NT tail	U	45.81	47.1	29.74	41.32	144.74	36.34	43.56	50.08
mmu-miR-3082-3p-0-2-TT	2.1	1.37	NT tail	UU	2.91	1.6	0.1	1.25	2.56	2.08	0.97	1.67
mmu-miR-3082-3p-1-0--	13.49	8.86	trimmed	other	11.63	10.38	8.01	7.51	20.49	12.46	6.78	7.51
mmu-miR-3082-3p-1-1-T	3.99	5.93	ambiguous tail	U	7.27	7.18	6.86	2.5	3.84	3.11	5.81	5.01
mmu-miR-3082-3p-2-0--	4.2	4.28	trimmed	other	2.18	1.6	10.3	2.5	3.84	2.08	4.84	6.68
mmu-miR-3083-5p-0-1-A	2.44	0.97	NT tail	A	2.91	0.8	0.1	0.1	1.28	5.19	0.97	0.83
mmu-miR-3083-5p-1-0--	4.73	3.37	trimmed	other	0.73	3.99	2.29	5.01	1.28	6.23	4.84	6.68
mmu-miR-3083b-3p-1-0--	13.34	14.39	trimmed	other	14.54	19.16	17.16	7.51	19.21	12.46	13.55	8.35
mmu-miR-3084-3p-1-2-0-0--	38.19	17.2	canonical	other	28.36	21.55	5.72	10.02	71.73	27	20.33	15.86
mmu-miR-3084-3p-1-2-0-1-A	58.67	38.33	NT tail	A	60.35	47.1	29.74	13.77	73.01	61.26	40.66	41.73
mmu-miR-3084-3p-1-2-0-1-T	3.46	1.5	NT tail	U	2.18	0.8	2.29	1.25	7.69	1.04	0.97	1.67
mmu-miR-3084-3p-1-2-0-2-AA	5.13	1.41	NT tail	AA	2.18	1.6	0.1	1.25	7.69	5.19	1.94	2.5
mmu-miR-3084-3p-1-2-1-0--	31.73	18.53	trimmed	other	16	19.16	17.16	11.27	44.83	31.15	29.04	19.2
mmu-miR-3084-3p-1-2-2-0--	13.11	12.74	trimmed	other	8	13.57	8.01	13.77	25.62	10.38	20.33	3.34
mmu-miR-3084-5p-1-2-0-0--	5.18	2.55	canonical	other	0.73	5.59	3.43	0.1	5.12	6.23	2.9	4.17
mmu-miR-3085-3p-0-0--	7.88	9.97	canonical	other	11.63	10.38	22.88	0.1	3.84	7.27	4.84	12.52
mmu-miR-3085-3p-0-1-T	103.92	116.69	NT tail	U	171.61	107.77	154.44	96.41	157.55	41.53	53.24	112.67
mmu-miR-3085-3p-0-2-CT	11.8	13.64	NT tail	other	25.45	19.96	11.44	11.27	25.62	3.11	0.1	6.68
mmu-miR-3085-3p-0-2-TT	6.36	6.72	NT tail	UU	10.91	11.18	4.58	5.01	5.12	3.11	1.94	10.85
mmu-miR-3085-3p-0-3-TTT	1.91	3.37	NT tail	UUU	2.91	2.39	1.14	7.51	3.84	1.04	2.9	0.83
mmu-miR-3085-3p-1-0--	33.77	30.99	trimmed	other	56.72	25.55	25.17	38.82	60.2	1.04	8.71	40.06
mmu-miR-3086-3p-0-0--	1.76	2.77	canonical	other	2.18	7.18	3.43	0.1	2.56	1.04	0.97	1.67
mmu-miR-3086-5p-0-0--	9.9	9.88	canonical	other	8.73	7.98	12.58	7.51	6.4	12.46	12.58	10.85
mmu-miR-3086-5p-0-2-AA	2.23	6.31	NT tail	AA	4.36	8.78	11.44	5.01	1.28	2.08	1.94	3.34
mmu-miR-3086-5p-0-2-AG	6.76	3.95	NT tail	other	2.18	6.39	9.15	0.1	3.84	7.27	1.94	9.18
mmu-miR-3086-5p-0-3-AGG	5.03	9.65	NT tail	other	8.73	0.8	12.58	21.29	3.84	6.23	4.84	5.01
mmu-miR-3087-3p-0-2-GT	6.77	9.94	NT tail	other	4.36	9.58	8.01	11.27	12.81	4.15	16.46	3.34
mmu-miR-3091-3p-0-0--	1.33	0.1	canonical	other	0.1	0.1	0.1	0.1	1.28	1.04	0.1	1.67
mmu-miR-3093-3p-0-0--	12.28	12.98	canonical	other	14.54	12.77	19.45	7.51	8.97	18.69	10.65	9.18
mmu-miR-3093-3p-1-1-T	2.73	4.43	ambiguous tail	U	3.64	0.8	12.58	1.25	2.56	3.11	3.87	2.5
mmu-miR-3093-5p-0-0--	505.36	401.55	canonical	other	441.38	387.18	592.59	388.16	860.78	192.08	198.44	463.21
mmu-miR-3098-5p-0-0--	5.52	2.08	canonical	other	0.1	7.98	0.1	1.25	12.81	2.08	0.97	1.67
mmu-miR-3099-3p-0-0--	99.34	112.89	canonical	other	96.71	135.71	104.1	164.03	180.61	53.99	63.89	63.43
mmu-miR-3099-3p-0-1-A	17.73	13.27	NT tail	A	12.36	15.97	12.58	22.54	29.46	10.38	2.9	13.35
mmu-miR-3099-3p-0-1-T	38.37	37.99	ambiguous tail	U	40.72	35.13	46.9	48.83	55.08	12.46	18.39	47.57
mmu-miR-3099-3p-0-2-AA	2.33	0.24	NT tail	AA	0.1	0.8	0.1	0.1	5.12	1.04	0.1	0.83
mmu-miR-3099-3p-0-2-AT	10.71	4.14	NT tail	AU	5.82	1.6	2.29	10.02	19.21	2.08	0.97	10.85
mmu-miR-3099-3p-0-2-TT	9.75	6.66	NT tail	UU	9.45	8.78	6.86	6.26	12.81	7.27	1.94	9.18
mmu-miR-3099-3p-0-3-ATT	3.3	1.97	NT tail	AUU	2.91	3.19	1.14	2.5	3.84	1.04	0.1	5.01
mmu-miR-3099-3p-1-0--	72.74	58.35	trimmed	other	71.26	71.05	64.06	56.35	117.84	43.61	29.04	56.75
mmu-miR-3099-3p-2-0--	74.32	72.08	trimmed	other	66.9	63.86	78.94	83.89	111.44	66.45	66.79	45.07
mmu-miR-3099-3p-2-1-A	22.47	15.32	ambiguous tail	A	14.54	25.55	20.59	6.26	33.3	24.92	9.68	9.18
mmu-miR-3099-3p-2-1-T	9.77	18.06	ambiguous tail	U	18.18	19.96	19.45	16.28	14.09	5.19	16.46	10.02
mmu-miR-3099-3p-2-2-AA	11.67	4.52	ambiguous tail	AA	2.91	1.6	2.29	10.02	26.9	7.27	5.81	0.83
mmu-miR-3099-3p-2-2-AT	7.89	3.44	ambiguous tail	AU	4.36	3.99	3.43	2.5	14.09	6.23	2.9	3.34
mmu-miR-3099-3p-2-3-AAA	2.87	0.45	ambiguous tail	AAA	0.1	0.8	1.14	0.1	2.56	1.04	0.1	5.01
mmu-miR-3099-3p-3-0--	106.69	99.96	trimmed	other	93.08	76.64	110.97	82.64	148.59	91.37	136.49	80.12
mmu-miR-3099-3p-3-1-A	15.47	3.91	ambiguous tail	A	6.54	0.8	4.58	3.76	16.65	15.57	3.87	14.19
mmu-miR-3099-3p-3-1-T	7.42	5.26	ambiguous tail	U	5.09	5.59	2.29	7.51	7.69	6.23	5.81	8.35
mmu-miR-3099-3p-3-2-AT	3.13	1.5	ambiguous tail	AU	2.18	0.1	0.1	5.01	1.28	7.27	0.1	0.83
mmu-miR-3099-3p-3-3-AAA	4.25	0.47	ambiguous tail	AAA	0.1	0.1	0.1	0.1	2.56	9.34	1.94	0.83
mmu-miR-30a-5p-0-0--	1116.27	1069.15	canonical	other	1117.64	1238.96	1076.5	664.88	926.1	1083.98	1247.75	1338.71
mmu-miR-30a-5p-0-1-A	6227.88	5116.34	NT tail	A	4383.31	5128.28	4414.69	4200.87	4695.85	7911.82	7454.53	6075.96
mmu-miR-30a-5p-0-1-C	2628.82	2657.78	ambiguous tail	C	2586.5	2678.3	2708.99	2153.65	2027.69	2964.34	3161.47	2894.43
mmu-miR-30a-5p-0-1-T	640.84	665.62	NT tail	U	660.99	687.34	553.69	589.75	540.55	726.81	836.35	655.17
mmu-miR-30a-5p-0-2-CA	42.88	30.22	NT tail	other	32.72	35.13	26.31	16.28	25.62	52.95	40.66	50.08
mmu-miR-30a-5p-0-2-CC	39.72	39.42	NT tail	other	30.54	30.34	37.75	50.08	25.62	72.68	48.4	20.87
mmu-miR-30a-5p-0-2-CG	506.36	502.17	NT tail	other	269.05	441.46	276.85	622.31	276.68	1027.91	901.2	214.49
mmu-miR-30a-5p-0-2-CT	36295	37250.2	ambiguous tail	other	38455.7	40478.6	37668.4	34625	33018.2	36315.4	35023.1	39551.3
mmu-miR-30a-5p-0-3-CCT	102.78	77.65	NT tail	other	100.35	68.65	86.94	41.32	133.22	75.8	90.99	99.32
mmu-miR-30a-5p-0-3-CTA	19.68	0.1	NT tail	other	0.1	0.1	0.1	0.1	20.49	13.5	0.1	25.04
mmu-miR-30a-5p-0-3-CTT	2834.51	3033.82	NT tail	other	3245.31	3248.28	2940.07	2807.26	2214.71	3088.93	2928.19	3199.9
mmu-miR-30a-5p-1-0--	4100.15	3803.42	trimmed	other	3528.17	4103.26	3603.59	2966.28	3002.47	4707.64	4815.78	4590.36
mmu-miR-30a-5p-1-1-A	387.5	322.27	ambiguous tail	A	327.95	368.81	313.46	187.82	276.68	329.14	413.33	556.68
mmu-miR-30a-5p-1-1-T	25.78	29.3	ambiguous tail	U	28.36	23.95	30.89	40.07	20.49	25.96	23.23	30.88
mmu-miR-30a-5p-2-0--	174156	118806	trimmed	other	91131.8	98893.4	94394.7	89639.5	210783	191917	219968	119770
mmu-miR-30a-5p-2-1-T	37.05	29.52	ambiguous tail	U	24.72	26.34	13.73	15.03	28.18	57.11	67.76	25.87
mmu-miR-30a-5p-2-2-GA	46.22	24.32	ambiguous tail	other	18.18	31.93	18.3	12.52	51.24	45.69	40.66	41.73
mmu-miR-30a-5p-3-0--	164.68	176.81	trimmed	other	101.07	98.99	59.49	162.78	112.72	280.34	461.73	100.99
mmu-miR-30a-5p-3-1-G	941.28	743.52	ambiguous tail	G	298.86	446.25	273.42	577.23	655.83	1853.36	2121.85	314.65
mmu-miR-30a-5p-3-1-T	34.9	27.1	ambiguous tail	U	16.72	27.14	16.02	0.1	28.18	53.99	75.5	22.53
mmu-miR-30a-5p-4-1-A	45.32	1.97	ambiguous tail	A	9.45	0.1	0.1	0.1	19.21	67.49	0.1	49.24
mmu-miR-30a-5p-4-2-TA	21.36	13.71	ambiguous tail	UA	13.09	8.78	0.1	0.1	25.62	25.96	46.46	12.52
mmu-miR-30a-5p-5-3-TGA	21.92	7.08	ambiguous tail	other	0.1	7.98	0.1	0.1	17.93	31.15	27.1	16.69
mmu-miR-30a-5p-6-4-AGGA	20.08	17.14	ambiguous tail	other	16	16.76	13.73	15.03	28.18	14.54	24.2	17.53
mmu-miR-30a-5p-6-4-CGGA	21.97	19.4	ambiguous tail	other	13.82	18.36	21.74	15.03	23.06	27	28.07	15.86
mmu-miR-30a-5p-7-5-ATGGA	21.24	13.37	ambiguous tail	other	7.27	16.76	0.1	0.1	26.9	25.96	42.59	10.85
mmu-miR-30a-5p-8-6-GCTGGA	17.1	11.13	ambiguous tail	other	10.18	15.17	13.73	0.1	12.81	21.8	16.46	16.69
mmu-miR-30a-5p-9-7-AACTGGA	13.86	3.93	ambiguous tail	other	8.73	0.1	0.1	0.1	15.37	14.54	10.65	11.68
mmu-miR-30a-5p-9-7-TACTGGA	28.32	12.81	ambiguous tail	other	9.45	12.77	0.1	0.1	29.46	44.65	41.62	10.85
mmu-miR-30b-3p-0-0--	51.81	65.95	canonical	other	48.72	29.54	29.74	81.39	28.18	91.37	140.36	35.89
mmu-miR-30c-1-3p-0-0--	124.92	152.38	canonical	other	90.89	98.99	167.02	219.12	110.16	127.71	185.86	136.88
mmu-miR-30c-1-3p-0-1-T	4.42	3	NT tail	U	2.18	0.1	8.01	3.76	5.12	3.11	0.97	5.01
mmu-miR-30c-1-3p-1-0--	11.23	16.02	trimmed	other	10.18	10.38	22.88	25.04	6.4	11.42	11.62	15.86
mmu-miR-30c-1-3p-1-1-T	3.55	5.32	ambiguous tail	U	1.45	2.39	4.58	7.51	1.28	5.19	10.65	4.17
mmu-miR-30c-1-3p-2-0--	7.49	7.42	trimmed	other	8	9.58	8.01	3.76	7.69	7.27	7.74	7.51
mmu-miR-30c-2-3p-0-0--	116.46	113.35	canonical	other	85.08	94.2	133.85	115.2	64.05	152.63	138.42	132.7
mmu-miR-30c-2-3p-1-0--	10.8	9.14	trimmed	other	2.91	7.98	12.58	12.52	6.4	17.65	9.68	8.35
mmu-miR-30c-2-3p-2-0--	20.86	24.46	trimmed	other	22.54	24.75	17.16	28.8	14.09	25.96	29.04	22.53
mmu-miR-30c-2-3p-3-0--	2.1	1.66	trimmed	other	1.45	0.1	0.1	3.76	2.56	2.08	2.9	1.67
mmu-miR-30d-3p-0-0--	115.91	117.34	canonical	other	88.71	88.61	99.53	102.67	90.95	185.86	207.15	70.94
mmu-miR-30d-3p-0-1-T	19.16	14.44	NT tail	U	9.45	11.97	5.72	15.03	17.93	22.84	30.01	16.69
mmu-miR-30d-3p-2-0--	20.78	19.06	trimmed	other	5.09	23.15	8.01	21.29	6.4	42.57	37.75	13.35
mmu-miR-30d-5p-0-0--	1357.02	1284.25	canonical	other	1224.53	1334.76	1185.18	1238.35	1464.09	1163.93	1438.44	1443.04
mmu-miR-30d-5p-0-1-A	5991.43	4785.95	NT tail	A	4184.79	4365.9	4476.46	4748.05	6322.61	6129.06	6154.52	5522.62
mmu-miR-30d-5p-0-1-C	5904.7	6059.01	NT tail	C	6082.68	5556.17	6337.75	6645.02	6320.05	5113.61	5673.42	6280.44
mmu-miR-30d-5p-0-1-T	1252.07	1286.71	NT tail	U	1180.9	1183.88	1157.73	1583.94	1398.76	1074.64	1327.12	1282.8
mmu-miR-30d-5p-0-2-CA	35.39	33.13	NT tail	other	31.27	32.73	36.61	35.06	34.58	41.53	30.01	30.05
mmu-miR-30d-5p-0-2-CG	436.81	456.85	NT tail	other	286.5	403.94	272.27	632.32	315.11	776.65	689.21	218.67
mmu-miR-30d-5p-0-2-CT	29944.2	32600.5	NT tail	other	33607.8	33208.5	36911.1	33880	30897	25026.1	25395.4	33909.4
mmu-miR-30d-5p-0-3-CTA	27.34	0.1	NT tail	other	0.1	0.1	0.1	0.1	33.3	22.84	0.1	25.87
mmu-miR-30d-5p-0-3-CTT	3058.26	3695.53	NT tail	other	3992.1	3594.75	4277.41	3856.54	2374.82	2843.89	2756.85	3956.05
mmu-miR-30d-5p-1-0--	6325.06	5802.69	trimmed	other	5516.95	5323.86	5877.86	6574.9	7079.64	5312.96	5719.89	6582.57
mmu-miR-30d-5p-1-1-A	1122.76	949.78	ambiguous tail	A	935.85	1009.05	1086.8	755.03	1051.63	875.28	962.19	1441.37
mmu-miR-30d-5p-1-1-T	66.26	55.38	ambiguous tail	U	74.17	48.7	51.48	63.86	55.08	56.07	38.72	87.63
mmu-miR-30d-5p-1-2-AA	37.24	34.55	ambiguous tail	AA	36.36	38.32	28.6	28.8	29.46	32.19	40.66	50.08
mmu-miR-30d-5p-2-0--	104648	75568.6	trimmed	other	67513.7	66867.2	70179.7	74493.8	148200	78313.5	98788.8	87430.4
mmu-miR-30d-5p-2-1-G	19.71	17.18	ambiguous tail	G	20.36	13.57	12.58	20.03	25.62	17.65	19.36	15.86
mmu-miR-30d-5p-2-1-T	94.61	72.48	ambiguous tail	U	73.44	66.26	69.78	63.86	83.26	73.72	89.06	126.86
mmu-miR-30d-5p-2-2-GA	41.37	17.76	ambiguous tail	other	13.09	12.77	13.73	16.28	67.89	22.84	32.91	33.38
mmu-miR-30d-5p-3-0--	125.79	142.05	trimmed	other	86.53	98.99	82.37	157.77	93.51	200.39	284.59	83.46
mmu-miR-30d-5p-3-1-G	410.39	347.2	ambiguous tail	G	189.79	245.88	180.75	390.66	418.86	605.33	728.9	206.98
mmu-miR-30d-5p-3-1-T	29.22	24.92	ambiguous tail	U	12.36	31.13	17.16	30.05	26.9	33.23	33.88	27.54
mmu-miR-30d-5p-4-1-A	29.79	1.53	ambiguous tail	A	7.27	0.1	0.1	0.1	19.21	34.26	0.1	35.89
mmu-miR-30d-5p-4-2-TA	13.46	10.3	ambiguous tail	UA	9.45	0.1	0.1	13.77	16.65	14.54	28.07	9.18
mmu-miR-30d-5p-6-4-CGGA	13.02	8.55	ambiguous tail	other	10.91	15.17	0.1	0.1	14.09	12.46	16.46	12.52
mmu-miR-30d-5p-9-7-TACTGGA	15.46	7.69	ambiguous tail	other	10.91	7.98	0.1	0.1	15.37	17.65	19.36	13.35
mmu-miR-30e-5p-0-0--	175.86	152.3	canonical	other	109.8	168.44	129.27	113.94	188.29	172.36	240.06	166.92
mmu-miR-30e-5p-0-1-A	304.52	219.34	NT tail	A	175.97	241.09	178.46	122.71	308.7	356.14	378.49	248.71
mmu-miR-30e-5p-0-1-C	815.45	775.29	NT tail	C	683.53	799.9	663.52	617.3	850.53	906.43	1112.23	689.39
mmu-miR-30e-5p-0-1-T	70.3	59.82	NT tail	U	49.45	42.31	38.9	72.62	69.17	75.8	95.83	65.93
mmu-miR-30e-5p-0-2-CA	22.08	11.54	NT tail	other	10.18	8.78	18.3	0.1	28.18	28.03	20.33	10.02
mmu-miR-30e-5p-0-2-CG	273.48	249.36	NT tail	other	117.07	209.95	97.24	280.48	254.9	462.04	542.08	103.49
mmu-miR-30e-5p-0-2-CT	22693.3	21765.5	NT tail	other	20550.9	23798.1	19483.4	19997.7	28742.5	20317.4	24997.5	19019.9
mmu-miR-30e-5p-0-3-CTA	16.66	0.1	NT tail	other	0.1	0.1	0.1	0.1	25.62	13.5	0.1	10.85
mmu-miR-30e-5p-0-3-CTT	3375.58	3725.35	NT tail	other	3677.96	4112.84	3182.6	3226.72	3139.53	3866.62	4426.64	3120.61
mmu-miR-30e-5p-1-0--	258.43	190.74	trimmed	other	147.61	170.84	132.7	205.35	313.82	233.62	297.17	227.85
mmu-miR-30e-5p-1-1-A	59.85	40.71	ambiguous tail	A	42.18	59.07	37.75	20.03	69.17	43.61	44.53	66.77
mmu-miR-30e-5p-2-0--	3340.29	1923.4	trimmed	other	1359.79	1505.59	1293.86	1617.74	5475.93	2776.4	3840.04	1768.54
mmu-miR-30e-5p-3-0--	206.07	243.11	trimmed	other	153.43	158.06	154.44	176.55	102.47	357.17	573.05	158.58
mmu-miR-30e-5p-4-1-A	64.37	6.9	ambiguous tail	A	0.1	16.76	0.1	0.1	20.49	118.37	17.42	54.25
mmu-miR-31-3p-0-0--	1.74	1.2	canonical	other	1.45	2.39	0.1	0.1	1.28	3.11	1.94	0.83
mmu-miR-31-5p-0-0--	127.61	165.45	canonical	other	146.89	157.27	170.46	159.02	122.97	112.14	193.6	147.73
mmu-miR-31-5p-0-1-T	54.81	80.04	NT tail	U	86.53	98.19	83.51	73.88	62.76	33.23	58.08	68.44
mmu-miR-31-5p-1-0--	113.71	185.84	trimmed	other	211.6	213.94	179.61	216.62	148.59	49.84	107.45	142.72
mmu-miR-31-5p-1-1-T	12.61	16.84	ambiguous tail	U	20.36	17.56	12.58	16.28	14.09	10.38	17.42	13.35
mmu-miR-31-5p-2-0--	14.54	17.46	trimmed	other	16.72	23.95	24.02	10.02	12.81	12.46	12.58	18.36
mmu-miR-3102-3p-0-0--	163.68	157.76	canonical	other	157.07	270.62	212.78	107.68	254.9	55.03	40.66	181.11
mmu-miR-3102-3p-0-1-G	161.89	141.66	NT tail	G	157.79	178.82	207.06	123.96	275.4	50.88	40.66	159.41
mmu-miR-3102-3p-0-1-T	2.18	1.25	NT tail	U	4.36	1.6	0.1	0.1	3.84	1.04	0.1	1.67
mmu-miR-3102-3p-0-2-CT	3.71	7.44	NT tail	other	6.54	11.18	16.02	2.5	3.84	3.11	0.97	4.17
mmu-miR-3102-3p-0-2-GA	19.23	2.89	NT tail	other	2.18	9.58	0.1	2.5	43.55	8.31	0.1	5.84
mmu-miR-3102-3p-0-2-GT	175.74	139.9	NT tail	other	162.88	197.98	177.32	126.46	342.01	55.03	34.85	130.2
mmu-miR-3102-3p-0-3-GTT	11.53	6.13	NT tail	other	8.73	9.58	10.3	0.1	26.9	5.19	1.94	2.5
mmu-miR-3102-3p-1-0--	91.12	78.91	trimmed	other	70.53	116.55	133.85	51.34	135.78	29.07	22.26	108.5
mmu-miR-3102-3p-1-1-T	5.43	6.37	ambiguous tail	U	5.82	7.18	13.73	5.01	10.25	1.04	0.1	5.01
mmu-miR-3102-3p-2-0--	4.92	10.08	trimmed	other	17.45	10.38	13.73	8.76	7.69	2.08	0.1	5.01
mmu-miR-3102-3p.2-3p-0-0--	10.1	13.78	canonical	other	16.72	15.97	21.74	12.52	11.53	2.08	1.94	16.69
mmu-miR-3102-3p.2-3p-0-1-T	10.37	17.66	NT tail	U	9.45	18.36	36.61	23.79	11.53	6.23	0.1	13.35
mmu-miR-3102-3p.2-3p-0-2-TA	2.96	0.1	NT tail	UA	0.1	0.1	0.1	0.1	5.12	2.08	0.1	1.67
mmu-miR-3102-3p.2-3p-0-2-TT	57.57	48.75	NT tail	UU	38.54	47.1	75.5	52.59	94.79	22.84	30.01	55.08
mmu-miR-3102-3p.2-3p-0-3-TTT	7.58	7.06	NT tail	UUU	4.36	2.39	26.31	1.25	8.97	2.08	0.97	11.68
mmu-miR-3102-3p.2-3p-1-0--	2.94	1.82	trimmed	other	0.1	0.1	5.72	1.25	2.56	2.08	1.94	4.17
mmu-miR-3102-5p.2-5p-0-0--	4.17	3.56	canonical	other	5.09	3.19	3.43	1.25	8.97	1.04	4.84	2.5
mmu-miR-3102-5p.2-5p-0-1-T	7.78	6.19	NT tail	U	11.63	6.39	5.72	6.26	8.97	5.19	0.97	9.18
mmu-miR-3102-5p.2-5p-1-0--	11.05	5.48	trimmed	other	4.36	11.97	3.43	3.76	26.9	2.08	3.87	4.17
mmu-miR-3103-3p-0-0--	5.47	2.8	canonical	other	2.18	3.19	2.29	6.26	7.69	6.23	0.1	2.5
mmu-miR-3104-3p-0-0--	1.89	0.1	canonical	other	0.1	0.1	0.1	0.1	1.28	1.04	0.1	3.34
mmu-miR-3104-3p-1-1-T	3.11	6.32	ambiguous tail	U	2.18	3.19	9.15	11.27	6.4	2.08	5.81	0.83
mmu-miR-32-3p-0-0--	4.52	1.36	canonical	other	2.18	0.1	0.1	2.5	1.28	7.27	1.94	5.01
mmu-miR-32-5p-2-0--	20.63	18.6	trimmed	other	16.72	23.15	9.15	18.78	19.21	21.8	25.17	20.87
mmu-miR-320-3p-0-0--	411.73	426.28	canonical	other	407.21	547.63	533.1	323.05	322.79	311.49	320.41	600.92
mmu-miR-320-3p-0-1-A	111.55	76.95	ambiguous tail	A	72.72	91.01	99.53	57.6	110.16	93.45	63.89	131.03
mmu-miR-320-3p-0-1-T	110.35	129.18	NT tail	U	122.16	138.9	187.62	92.66	105.04	79.95	104.54	146.06
mmu-miR-320-3p-0-2-AA	19.32	11.8	ambiguous tail	AA	8.73	7.18	16.02	21.29	19.21	14.54	5.81	24.2
mmu-miR-320-3p-0-2-AT	81.53	65.23	NT tail	AU	48.72	83.02	75.5	67.61	79.42	59.18	51.3	106
mmu-miR-320-3p-0-2-GT	11.81	0.1	NT tail	other	0.1	0.1	0.1	0.1	8.97	7.27	0.1	19.2
mmu-miR-320-3p-0-2-TA	22.34	8.74	NT tail	UA	10.18	4.79	11.44	3.76	17.93	33.23	13.55	15.86
mmu-miR-320-3p-0-2-TT	124.37	202.08	NT tail	UU	121.44	195.58	249.39	220.37	125.53	104.87	223.61	142.72
mmu-miR-320-3p-0-3-AAT	8.47	4.31	NT tail	AAU	5.82	7.18	3.43	5.01	7.69	5.19	0.1	12.52
mmu-miR-320-3p-0-3-ACT	3.38	1.35	NT tail	other	1.45	0.1	0.1	5.01	6.4	2.08	0.1	1.67
mmu-miR-320-3p-0-3-ATT	17.25	15.1	NT tail	AUU	13.09	7.18	24.02	13.77	21.78	12.46	17.42	17.53
mmu-miR-320-3p-0-3-TAT	3.43	1.84	NT tail	UAU	0.1	3.19	4.58	1.25	3.84	3.11	0.1	3.34
mmu-miR-320-3p-0-3-TTT	9.42	12.56	NT tail	UUU	16	19.96	8.01	6.26	14.09	4.15	12.58	10.02
mmu-miR-320-3p-1-0--	41.39	54.1	trimmed	other	58.17	74.24	64.06	27.55	29.46	44.65	46.46	50.08
mmu-miR-320-3p-1-1-C	4.42	2.8	ambiguous tail	C	2.91	7.98	0.1	0.1	5.12	3.11	2.9	5.01
mmu-miR-320-3p-1-1-G	5.84	7.25	ambiguous tail	G	9.45	7.98	0.1	10.02	2.56	12.46	8.71	2.5
mmu-miR-320-3p-1-1-T	48.61	80.33	ambiguous tail	U	66.9	79.03	125.84	77.63	44.83	38.42	52.27	62.6
mmu-miR-320-3p-1-2-TT	6.83	26.73	ambiguous tail	UU	26.9	19.16	37.75	27.55	3.84	8.31	22.26	8.35
mmu-miR-320-3p-2-0--	46.5	107.8	trimmed	other	78.53	88.61	125.84	141.49	35.87	60.22	104.54	43.4
mmu-miR-320-3p-2-1-T	7.93	10.59	ambiguous tail	U	13.09	10.38	12.58	6.26	10.25	5.19	10.65	8.35
mmu-miR-320-3p-3-0--	4.48	6.82	trimmed	other	2.91	14.37	5.72	6.26	5.12	4.15	4.84	4.17
mmu-miR-320-3p-3-1-A	6.21	4.16	ambiguous tail	A	5.09	4.79	0.1	5.01	5.12	9.34	5.81	4.17
mmu-miR-320-3p-3-3-AAT	1.68	0.1	ambiguous tail	AAU	0.1	0.1	0.1	0.1	1.28	2.08	0.1	1.67
mmu-miR-322-3p-0-0--	4.32	6.24	canonical	other	5.09	10.38	0.1	5.01	2.56	6.23	10.65	4.17
mmu-miR-322-3p-0-1-G	1.74	2.41	NT tail	G	0.1	1.6	0.1	2.5	1.28	3.11	7.74	0.83
mmu-miR-322-3p-0-1-T	76.97	90.45	NT tail	U	106.17	111.76	70.93	101.42	66.61	67.49	61.95	96.81
mmu-miR-322-3p-1-0--	17.66	16.45	trimmed	other	14.54	11.18	14.87	8.76	14.09	28.03	32.91	10.85
mmu-miR-322-3p-1-1-A	6.21	2.52	ambiguous tail	A	1.45	7.98	1.14	0.1	3.84	3.11	1.94	11.68
mmu-miR-322-3p-2-0--	4.54	3.45	trimmed	other	5.82	6.39	0.1	0.1	3.84	3.11	4.84	6.68
mmu-miR-322-3p-2-1-T	5.76	3.29	ambiguous tail	U	5.82	1.6	4.58	2.5	7.69	2.08	1.94	7.51
mmu-miR-322-5p-0-0--	138.97	166.26	canonical	other	165.79	130.92	138.42	222.88	117.84	201.43	173.27	97.65
mmu-miR-322-5p-0-1-A	4.61	2.17	NT tail	A	4.36	3.19	0.1	1.25	3.84	4.15	1.94	5.84
mmu-miR-322-5p-0-1-T	650	465.16	NT tail	U	410.12	372.01	275.7	579.73	814.66	775.61	688.24	359.72
mmu-miR-322-5p-0-2-TA	3.28	3.35	NT tail	UA	3.64	4.79	5.72	2.5	2.56	3.11	0.1	4.17
mmu-miR-322-5p-0-2-TT	1.4	0.54	NT tail	UU	0.73	0.8	0.1	0.1	1.28	2.08	0.97	0.83
mmu-miR-322-5p-1-0--	4.51	4.46	trimmed	other	5.82	5.59	2.29	3.76	1.28	11.42	4.84	0.83
mmu-miR-323-3p-0-0--	474.52	460.84	canonical	other	658.08	424.7	315.74	463.29	676.32	422.59	442.37	324.66
mmu-miR-323-3p-1-0--	20.68	21.34	trimmed	other	26.9	18.36	18.3	23.79	34.58	16.61	19.36	10.85
mmu-miR-323-3p-1-1-A	19.13	13.23	ambiguous tail	A	14.54	9.58	14.87	8.76	15.37	27	18.39	15.02
mmu-miR-323-3p-1-1-C	24.77	18.42	ambiguous tail	C	16	23.15	12.58	20.03	24.34	20.77	20.33	29.21
mmu-miR-323-3p-1-1-G	8.12	13.85	ambiguous tail	G	8	9.58	4.58	11.27	8.97	10.38	35.82	5.01
mmu-miR-323-3p-2-0--	6.99	6.37	trimmed	other	5.09	7.98	2.29	8.76	7.69	12.46	7.74	0.83
mmu-miR-323-5p-0-0--	12.2	16.66	canonical	other	19.63	18.36	14.87	27.55	23.06	5.19	2.9	8.35
mmu-miR-323-5p-1-0--	10.25	8.93	trimmed	other	13.82	5.59	3.43	15.03	14.09	4.15	6.78	12.52
mmu-miR-324-3p-0-0--	20.57	29.87	canonical	other	32.72	32.73	38.9	36.31	35.87	4.15	8.71	21.7
mmu-miR-324-3p-0-1-G	97.81	116.77	ambiguous tail	G	90.17	95.8	159.02	165.28	124.25	49.84	73.57	119.35
mmu-miR-324-3p-0-2-GG	8.04	11.6	ambiguous tail	other	19.63	11.97	10.3	11.27	7.69	7.27	4.84	9.18
mmu-miR-324-3p-0-2-GT	11.81	22.76	NT tail	other	27.63	35.13	22.88	17.53	8.97	7.27	10.65	19.2
mmu-miR-324-3p-2-0--	3.77	17.28	trimmed	other	21.09	6.39	25.17	25.04	2.56	2.08	8.71	6.68
mmu-miR-324-5p-0-0--	1077.31	832.28	canonical	other	980.21	1169.51	1011.29	300.51	1147.7	962.5	699.86	1121.72
mmu-miR-324-5p-0-1-T	8.42	10.07	NT tail	U	10.91	13.57	16.02	5.01	10.25	4.15	4.84	10.85
mmu-miR-324-5p-1-0--	51.55	67.87	trimmed	other	64.72	76.64	62.92	66.36	39.71	49.84	68.73	65.1
mmu-miR-324-5p-1-1-A	26.05	9.65	ambiguous tail	A	9.45	13.57	9.15	2.5	19.21	23.88	13.55	35.05
mmu-miR-324-5p-1-1-G	97.31	68.72	ambiguous tail	G	69.08	95.8	66.35	38.82	102.47	131.86	73.57	57.59
mmu-miR-324-5p-2-0--	30.6	34.63	trimmed	other	45.08	43.11	40.04	18.78	30.74	17.65	26.14	43.4
mmu-miR-324-5p-2-1-A	18.99	11.98	ambiguous tail	A	19.63	8.78	5.72	11.27	15.37	24.92	14.52	16.69
mmu-miR-324-5p-3-0--	13.78	10.07	trimmed	other	11.63	15.17	9.15	3.76	14.09	15.57	10.65	11.68
mmu-miR-325-3p-0-0--	60.2	46.55	canonical	other	53.08	55.08	38.9	57.6	87.1	38.42	28.07	55.08
mmu-miR-325-3p-0-1-A	3.22	0.98	NT tail	A	2.18	2.39	0.1	0.1	3.84	4.15	0.1	1.67
mmu-miR-325-3p-0-1-T	2.03	1.31	NT tail	U	2.18	3.19	0.1	0.1	2.56	1.04	0.97	2.5
mmu-miR-325-3p-1-0--	100.09	79.81	trimmed	other	98.89	74.24	68.64	100.17	137.06	78.91	57.11	84.3
mmu-miR-325-3p-2-0--	27.94	21.32	trimmed	other	32.72	19.96	18.3	16.28	46.11	13.5	19.36	24.2
mmu-miR-325-3p-2-1-T	2.33	1.21	ambiguous tail	U	2.91	0.8	0.1	1.25	5.12	1.04	0.97	0.83
mmu-miR-325-3p-3-0--	4.69	1.28	trimmed	other	1.45	0.1	0.1	3.76	5.12	3.11	0.97	5.84
mmu-miR-325-5p-0-0--	4.22	6.74	canonical	other	8.73	10.38	5.72	5.01	6.4	2.08	3.87	4.17
mmu-miR-325-5p-1-0--	12.71	11.46	trimmed	other	12.36	15.17	8.01	6.26	11.53	20.77	15.49	5.84
mmu-miR-325-5p-1-1-A	6.33	5.43	ambiguous tail	A	0.73	8.78	10.3	2.5	2.56	11.42	4.84	5.01
mmu-miR-325-5p-2-0--	40.45	31.9	trimmed	other	34.18	33.53	24.02	21.29	33.3	44.65	46.46	43.4
mmu-miR-325-5p-3-0--	1.74	1.9	trimmed	other	0.73	5.59	1.14	0.1	1.28	3.11	1.94	0.83
mmu-miR-326-3p-0-0--	684.31	628.33	canonical	other	740.97	730.44	797.37	480.82	1175.88	241.92	392.04	635.14
mmu-miR-326-3p-0-1-A	142.84	36.26	NT tail	A	46.54	41.51	34.32	46.33	202.39	50.88	12.58	175.27
mmu-miR-326-3p-0-1-T	156.03	226.68	NT tail	U	252.32	229.91	369.51	200.34	206.23	41.53	81.31	220.34
mmu-miR-326-3p-0-2-AA	67.66	13.37	NT tail	AA	14.54	14.37	13.73	21.29	61.48	36.34	2.9	105.16
mmu-miR-326-3p-0-2-TT	5.5	4.73	NT tail	UU	2.91	6.39	2.29	6.26	10.25	2.08	5.81	4.17
mmu-miR-326-3p-0-3-AAA	6.86	0.1	NT tail	AAA	0.1	0.1	0.1	0.1	6.4	4.15	0.1	10.02
mmu-miR-326-3p-1-0--	61.74	61.66	trimmed	other	74.9	75.84	60.63	68.87	103.75	23.88	28.07	57.59
mmu-miR-326-3p-1-1-A	23.08	8.09	ambiguous tail	A	5.82	6.39	16.02	11.27	19.21	12.46	0.97	37.56
mmu-miR-326-3p-1-1-C	5.29	3.08	ambiguous tail	C	4.36	3.99	0.1	5.01	10.25	3.11	1.94	2.5
mmu-miR-326-3p-2-0--	9.35	6.55	trimmed	other	8.73	7.18	11.44	2.5	14.09	7.27	2.9	6.68
mmu-miR-326-3p-2-1-T	2.94	7.5	ambiguous tail	U	6.54	4.79	5.72	17.53	2.56	2.08	2.9	4.17
mmu-miR-326-3p-2-2-AA	8.87	0.58	ambiguous tail	AA	0.1	0.1	0.1	2.5	6.4	5.19	0.1	15.02
mmu-miR-326-3p-2-2-AT	4.43	0.1	ambiguous tail	AU	0.1	0.1	0.1	0.1	6.4	1.04	0.1	5.84
mmu-miR-326-3p-2-2-CT	13.77	13.76	ambiguous tail	other	19.63	11.18	22.88	15.03	10.25	5.19	0.1	25.87
mmu-miR-326-3p-2-2-TT	7.98	22.6	ambiguous tail	UU	29.81	21.55	32.03	23.79	16.65	3.11	5.81	4.17
mmu-miR-326-3p-2-3-AAA	4.54	0.1	ambiguous tail	AAA	0.1	0.1	0.1	0.1	2.56	1.04	0.1	10.02
mmu-miR-326-3p-2-3-TTT	8.91	9.2	ambiguous tail	UUU	12.36	12.77	11.44	7.51	10.25	3.11	1.94	13.35
mmu-miR-329-3p-0-0--	179.21	183.7	canonical	other	295.95	199.58	185.33	130.22	231.85	107.98	107.45	197.8
mmu-miR-329-3p-0-1-T	19.42	19.77	ambiguous tail	U	24	21.55	22.88	18.78	24.34	19.73	11.62	14.19
mmu-miR-329-3p-1-0--	50.05	54.57	trimmed	other	71.26	71.85	64.06	25.04	75.57	22.84	40.66	51.75
mmu-miR-329-3p-1-1-A	3.98	7.73	ambiguous tail	A	8	7.18	14.87	3.76	2.56	1.04	4.84	8.35
mmu-miR-329-3p-1-1-C	31.12	43.95	ambiguous tail	C	74.9	58.28	41.18	25.04	47.39	30.11	20.33	15.86
mmu-miR-329-3p-1-2-CT	5.09	5.19	ambiguous tail	other	5.82	7.18	5.72	6.26	3.84	7.27	0.97	4.17
mmu-miR-329-3p-2-0--	2.09	1.88	trimmed	other	2.18	1.6	4.58	0.1	1.28	4.15	0.97	0.83
mmu-miR-329-3p-2-2-CT	1.33	0.37	ambiguous tail	other	1.45	0.1	0.1	0.1	1.28	1.04	0.1	1.67
mmu-miR-329-5p-0-0--	250.82	389.36	canonical	other	368.67	353.65	386.67	424.47	198.54	317.72	413.33	236.19
mmu-miR-329-5p-0-1-T	205.91	256.39	ambiguous tail	U	261.05	249.87	292.86	179.05	213.91	203.51	299.11	200.31
mmu-miR-329-5p-0-2-TC	29.67	39.8	ambiguous tail	other	42.18	56.68	61.78	11.27	29.46	27	27.1	32.55
mmu-miR-329-5p-0-2-TT	7.06	11.27	NT tail	UU	11.63	11.18	12.58	11.27	5.12	5.19	9.68	10.85
mmu-miR-329-5p-0-3-TCA	1.91	0.1	NT tail	other	0.1	0.1	0.1	0.1	3.84	1.04	0.1	0.83
mmu-miR-329-5p-0-3-TCT	67.42	81.08	ambiguous tail	other	93.8	76.64	85.8	81.39	71.73	61.26	67.76	69.27
mmu-miR-329-5p-0-3-TTT	3.07	1.29	NT tail	UUU	0.1	1.6	4.58	0.1	1.28	2.08	0.1	5.84
mmu-miR-329-5p-1-0--	40.34	76.64	trimmed	other	84.35	74.24	89.23	67.61	43.55	33.23	67.76	44.23
mmu-miR-329-5p-1-1-A	8.25	2.51	ambiguous tail	A	1.45	2.39	0.1	3.76	7.69	10.38	4.84	6.68
mmu-miR-329-5p-2-0--	1.95	1.79	trimmed	other	5.09	0.1	1.14	2.5	1.28	2.08	0.1	2.5
mmu-miR-329-5p-3-0--	2.6	7.29	trimmed	other	5.09	5.59	8.01	10.02	3.84	3.11	7.74	0.83
mmu-miR-33-5p-1-0--	3.82	1.57	trimmed	other	2.18	1.6	0.1	0.1	1.28	9.34	3.87	0.83
mmu-miR-330-3p-0-0--	63.91	53.02	canonical	other	71.26	75.84	52.62	36.31	89.66	39.46	29.04	62.6
mmu-miR-330-3p-0-1-A	6.47	0.4	NT tail	A	0.1	1.6	0.1	0.1	2.56	9.34	0.1	7.51
mmu-miR-330-3p-0-1-G	2.31	6.84	ambiguous tail	G	2.91	7.98	13.73	3.76	2.56	1.04	5.81	3.34
mmu-miR-330-3p-0-2-GA	1.33	2.36	NT tail	other	4.36	0.1	0.1	6.26	1.28	1.04	0.97	1.67
mmu-miR-330-3p-0-2-GG	23.01	23.27	ambiguous tail	other	18.18	19.96	19.45	41.32	29.46	18.69	17.42	20.87
mmu-miR-330-3p-0-2-GT	14.52	12.52	NT tail	other	13.09	13.57	22.88	6.26	17.93	7.27	6.78	18.36
mmu-miR-330-3p-0-3-GGT	16.15	8.55	ambiguous tail	other	2.91	9.58	11.44	6.26	23.06	10.38	12.58	15.02
mmu-miR-330-3p-1-0--	1.76	9.34	trimmed	other	10.18	15.17	13.73	3.76	2.56	1.04	3.87	1.67
mmu-miR-330-3p-1-1-T	7.2	13.07	ambiguous tail	U	17.45	11.18	17.16	13.77	6.4	5.19	5.81	10.02
mmu-miR-330-3p-2-0--	7.98	10.4	trimmed	other	17.45	7.98	12.58	6.26	7.69	6.23	7.74	10.02
mmu-miR-330-5p-0-0--	612.71	829.51	canonical	other	818.05	808.68	1021.59	1001.7	585.38	612.59	497.55	640.15
mmu-miR-330-5p-0-1-A	60.13	71.1	NT tail	A	70.53	92.6	112.11	33.81	51.24	41.53	46.46	87.63
mmu-miR-330-5p-0-1-G	26.27	35.83	NT tail	G	26.9	22.35	16.02	53.84	24.34	43.61	60.02	10.85
mmu-miR-330-5p-0-1-T	2843.29	3530.59	ambiguous tail	U	3898.29	3706.51	4159.57	3618.64	3121.6	2139.93	2269.95	3268.33
mmu-miR-330-5p-0-2-TA	22.22	5.28	NT tail	UA	8.73	7.18	10.3	0.1	33.3	8.31	0.1	25.04
mmu-miR-330-5p-0-2-TC	145.94	146.22	ambiguous tail	other	170.15	142.9	148.72	128.97	179.33	139.13	140.36	119.35
mmu-miR-330-5p-0-2-TT	178.89	208.97	NT tail	UU	209.42	233.9	268.84	156.52	217.76	153.67	176.18	165.25
mmu-miR-330-5p-1-0--	117.78	167.67	trimmed	other	140.34	182.01	204.78	172.79	112.72	124.6	138.42	116.01
mmu-miR-330-5p-1-1-A	552	506.11	ambiguous tail	A	436.29	554.02	687.54	464.54	486.75	489.04	388.17	680.21
mmu-miR-330-5p-1-1-T	24.42	28.46	ambiguous tail	U	21.09	17.56	41.18	36.31	16.65	29.07	26.14	27.54
mmu-miR-330-5p-1-2-TT	47.83	66.95	ambiguous tail	UU	61.08	59.87	76.65	83.89	70.45	40.49	53.24	32.55
mmu-miR-330-5p-2-0--	27.5	30.99	trimmed	other	29.09	34.33	33.18	22.54	28.18	25.96	35.82	28.38
mmu-miR-330-5p-3-0--	41.6	40.79	trimmed	other	29.81	41.51	59.49	23.79	38.43	44.65	49.37	41.73
mmu-miR-331-3p-0-0--	33.24	16.75	canonical	other	31.99	20.76	16.02	6.26	47.39	11.42	8.71	40.9
mmu-miR-331-3p-0-1-A	14.42	11.92	NT tail	A	13.09	24.75	9.15	8.76	23.06	5.19	3.87	15.02
mmu-miR-331-3p-0-1-C	13.57	12.49	NT tail	C	13.09	21.55	20.59	6.26	11.53	4.15	0.97	25.04
mmu-miR-331-3p-0-1-T	34.81	26.75	NT tail	U	44.36	30.34	33.18	7.51	52.52	9.34	18.39	42.57
mmu-miR-331-3p-1-0--	57.6	42.16	trimmed	other	59.63	64.66	44.62	22.54	71.73	25.96	19.36	75.11
mmu-miR-331-3p-1-1-C	17.57	20.16	ambiguous tail	C	16	21.55	22.88	20.03	25.62	6.23	20.33	20.87
mmu-miR-331-3p-1-2-CC	28.14	26.83	ambiguous tail	other	23.27	39.12	33.18	25.04	42.27	2.08	13.55	40.06
mmu-miR-331-3p-1-2-CT	13.12	21.39	ambiguous tail	other	18.91	35.13	28.6	17.53	7.69	8.31	6.78	23.37
mmu-miR-331-3p-2-0--	2.46	3.78	trimmed	other	6.54	4.79	4.58	0.1	3.84	1.04	2.9	2.5
mmu-miR-331-3p-2-1-T	2.09	5.64	ambiguous tail	U	5.82	3.99	3.43	6.26	1.28	4.15	8.71	0.83
mmu-miR-331-5p-0-0--	3.07	1.38	canonical	other	2.18	2.39	0.1	1.25	2.56	4.15	0.97	2.5
mmu-miR-331-5p-1-0--	67.23	55.55	trimmed	other	43.63	48.7	52.62	77.63	73.01	56.07	55.18	72.61
mmu-miR-331-5p-2-0--	9.1	10.58	trimmed	other	8	4.79	14.87	8.76	8.97	8.31	16.46	10.02
mmu-miR-335-3p-0-0--	507.79	485.49	canonical	other	667.53	574.78	316.89	473.3	604.59	420.51	394.94	498.26
mmu-miR-335-3p-0-1-T	8.9	11.27	NT tail	U	10.18	9.58	6.86	20.03	10.25	7.27	9.68	9.18
mmu-miR-335-3p-1-0--	158.67	183.88	trimmed	other	294.5	207.56	128.13	101.42	117.84	196.24	187.79	161.91
mmu-miR-335-3p-1-1-T	30.89	32.84	ambiguous tail	U	48.72	23.95	30.89	32.56	37.15	36.34	28.07	19.2
mmu-miR-335-3p-2-0--	5.45	6.12	trimmed	other	8.73	4.79	5.72	7.51	5.12	6.23	3.87	5.01
mmu-miR-335-5p-0-0--	1246.67	1244.03	canonical	other	1543.76	1244.55	801.94	1326	1684.41	1097.48	1303.89	958.13
mmu-miR-335-5p-0-1-T	18.51	10.72	ambiguous tail	U	18.91	9.58	4.58	13.77	24.34	22.84	6.78	8.35
mmu-miR-335-5p-1-0--	227.6	213.26	trimmed	other	235.6	213.15	113.26	221.63	268.99	207.66	282.65	206.15
mmu-miR-335-5p-1-1-G	4.62	0.83	ambiguous tail	G	0.1	0.1	0.1	3.76	5.12	6.23	0.1	2.5
mmu-miR-335-5p-2-0--	574.52	439.05	trimmed	other	455.93	479.78	292.86	608.53	972.22	349.91	358.16	401.45
mmu-miR-335-5p-3-0--	35.58	20.52	trimmed	other	26.18	19.16	3.43	32.56	55.08	20.77	21.3	30.88
mmu-miR-337-3p-0-0--	15.04	11.1	canonical	other	9.45	23.15	9.15	5.01	15.37	19.73	8.71	10.02
mmu-miR-337-3p-2-0--	28.39	29.09	trimmed	other	34.18	28.74	35.46	32.56	43.55	24.92	14.52	16.69
mmu-miR-337-5p-0-0--	792.37	770.37	canonical	other	823.14	708.09	805.37	671.14	859.5	809.87	844.09	707.75
mmu-miR-337-5p-0-1-A	4.76	0.1	NT tail	A	0.1	0.1	0.1	0.1	3.84	2.08	0.1	8.35
mmu-miR-337-5p-0-1-T	25.76	17.98	NT tail	U	31.99	11.97	9.15	21.29	20.49	34.26	15.49	22.53
mmu-miR-337-5p-1-0--	263.26	242.01	trimmed	other	218.15	273.02	290.58	164.03	229.28	295.91	264.26	264.57
mmu-miR-337-5p-1-1-A	29.18	20.6	ambiguous tail	A	17.45	15.97	27.46	15.03	30.74	34.26	27.1	22.53
mmu-miR-337-5p-2-0--	59.42	55.95	trimmed	other	56.72	65.46	56.06	46.33	37.15	72.68	55.18	68.44
mmu-miR-337-5p-3-0--	6.7	6.37	trimmed	other	10.91	5.59	0.1	7.51	5.12	8.31	7.74	6.68
mmu-miR-338-3p-0-0--	93.4	71.34	canonical	other	61.08	35.13	49.19	65.11	56.36	141.21	146.17	82.63
mmu-miR-338-3p-0-1-A	110.91	118.03	NT tail	A	146.89	76.64	77.79	82.64	76.86	159.9	206.18	95.98
mmu-miR-338-3p-1-0--	10328.5	7219.61	trimmed	other	4810.88	4834.51	3865.57	5822.37	5705.21	18957.2	16764.7	6323.01
mmu-miR-338-3p-2-0--	290.55	232.98	trimmed	other	141.8	158.06	141.86	175.3	161.4	523.3	547.89	186.95
mmu-miR-338-3p-2-1-A	22.59	8.25	ambiguous tail	A	6.54	0.1	10.3	0.1	7.69	46.72	24.2	13.35
mmu-miR-338-3p-3-0--	50.44	44.7	trimmed	other	32.72	26.34	20.59	23.79	8.97	117.33	120.03	25.04
mmu-miR-338-5p-0-0--	11.26	9.65	canonical	other	8.73	6.39	13.73	8.76	3.84	20.77	10.65	9.18
mmu-miR-338-5p-0-1-G	14.72	30.69	NT tail	G	33.45	25.55	42.33	25.04	11.53	25.96	27.1	6.68
mmu-miR-338-5p-0-1-T	5.85	11.06	NT tail	U	12.36	2.39	24.02	8.76	2.56	8.31	7.74	6.68
mmu-miR-338-5p-1-0--	547.04	496.51	trimmed	other	474.11	281.8	366.08	633.57	297.17	826.48	726.96	517.46
mmu-miR-338-5p-1-1-T	3.23	1.68	ambiguous tail	U	0.1	2.39	5.72	0.1	5.12	2.08	0.1	2.5
mmu-miR-338-5p-2-0--	18.27	17.84	trimmed	other	15.27	9.58	9.15	30.05	11.53	24.92	25.17	18.36
mmu-miR-338-5p-2-1-A	2.53	0.63	ambiguous tail	A	0.1	1.6	0.1	1.25	3.84	2.08	0.1	1.67
mmu-miR-339-3p-0-0--	4.33	5.46	canonical	other	3.64	9.58	1.14	10.02	3.84	4.15	2.9	5.01
mmu-miR-339-3p-0-2-TT	3.59	5.66	NT tail	UU	5.09	3.19	11.44	3.76	6.4	1.04	4.84	3.34
mmu-miR-339-3p-1-0--	7.64	12.06	trimmed	other	10.91	7.18	13.73	18.78	8.97	3.11	9.68	10.85
mmu-miR-339-3p-1-1-T	22.21	16.27	ambiguous tail	U	10.91	11.97	20.59	17.53	51.24	10.38	20.33	5.01
mmu-miR-339-3p-2-0--	13.2	21.31	trimmed	other	21.81	18.36	33.18	22.54	17.93	4.15	10.65	17.53
mmu-miR-339-3p-2-1-T	9.54	14.35	ambiguous tail	U	11.63	16.76	21.74	10.02	12.81	8.31	11.62	7.51
mmu-miR-339-3p-2-2-TT	8.22	9.55	ambiguous tail	UU	5.09	12.77	6.86	7.51	3.84	8.31	15.49	12.52
mmu-miR-339-3p-3-1-A	3.34	4.31	ambiguous tail	A	2.18	4.79	5.72	8.76	1.28	2.08	0.1	6.68
mmu-miR-339-5p-0-0--	5.88	6.2	canonical	other	10.18	3.99	5.72	6.26	14.09	1.04	4.84	2.5
mmu-miR-339-5p-1-0--	3.98	5.01	trimmed	other	8	6.39	5.72	0.1	2.56	5.19	4.84	4.17
mmu-miR-339-5p-1-1-A	2.46	1.04	ambiguous tail	A	0.1	4.79	0.1	0.1	3.84	1.04	0.1	2.5
mmu-miR-339-5p-1-1-T	65.66	55.16	ambiguous tail	U	53.81	54.28	64.06	81.39	105.04	13.5	22.26	78.45
mmu-miR-339-5p-2-0--	24.95	17.97	trimmed	other	31.99	22.35	24.02	3.76	46.11	10.38	7.74	18.36
mmu-miR-339-5p-3-0--	136.1	161.48	trimmed	other	201.42	177.22	213.93	106.43	137.06	89.29	108.42	181.95
mmu-miR-339-5p-3-1-T	12.79	11.15	ambiguous tail	U	13.82	13.57	10.3	11.27	17.93	2.08	6.78	18.36
mmu-miR-340-3p-0-0--	104.07	95.22	canonical	other	95.98	75.84	72.07	118.95	120.41	118.37	113.26	73.45
mmu-miR-340-3p-0-1-C	107.65	134.03	ambiguous tail	C	135.98	114.96	108.68	216.62	122.97	109.02	93.9	90.97
mmu-miR-340-3p-0-1-T	3.43	4.51	NT tail	U	5.82	2.39	1.14	11.27	2.56	1.04	1.94	6.68
mmu-miR-340-3p-0-2-CG	6.93	7.19	NT tail	other	3.64	4.79	1.14	13.77	7.69	11.42	12.58	1.67
mmu-miR-340-3p-0-2-CT	116.69	135.94	NT tail	other	101.8	158.06	129.27	162.78	142.18	115.25	127.78	92.64
mmu-miR-340-5p-0-0--	3552.83	3605.28	canonical	other	3351.47	3482.19	2381.8	2854.84	2105.83	5932.82	5956.08	2619.84
mmu-miR-340-5p-0-1-T	12.07	13.98	NT tail	U	8	11.97	13.73	18.78	8.97	19.73	17.42	7.51
mmu-miR-340-5p-1-0--	896.55	935.98	trimmed	other	727.89	847	704.7	838.92	525.18	1546.02	1561.38	618.45
mmu-miR-340-5p-1-1-A	17.5	14.14	ambiguous tail	A	13.82	17.56	9.15	5.01	11.53	25.96	25.17	15.02
mmu-miR-340-5p-2-0--	61.65	50.18	trimmed	other	53.81	35.13	38.9	26.29	26.9	112.14	96.8	45.9
mmu-miR-341-3p-0-0--	1135.23	1330.12	canonical	other	1572.84	1361.1	1699.98	1016.72	970.94	788.07	999.94	1646.69
mmu-miR-341-3p-0-1-A	32.76	15.26	NT tail	A	19.63	19.96	21.74	6.26	32.02	18.69	8.71	47.57
mmu-miR-341-3p-0-1-C	28.12	35.14	ambiguous tail	C	43.63	47.1	44.62	20.03	25.62	22.84	20.33	35.89
mmu-miR-341-3p-0-1-T	432.44	505.46	NT tail	U	564.27	617.09	636.06	334.32	388.12	371.71	375.58	537.49
mmu-miR-341-3p-1-0--	25.2	41.91	trimmed	other	47.99	33.53	40.04	55.09	19.21	32.19	32.91	24.2
mmu-miR-341-3p-1-1-A	19.22	5.61	ambiguous tail	A	11.63	7.98	0.1	2.5	8.97	27	5.81	21.7
mmu-miR-341-3p-1-1-C	159.63	196.95	ambiguous tail	C	265.41	227.52	239.1	102.67	207.51	102.79	150.04	168.59
mmu-miR-341-3p-1-1-G	7.93	7.52	ambiguous tail	G	5.09	5.59	5.72	3.76	3.84	16.61	17.42	3.34
mmu-miR-341-3p-3-0--	5.42	3.17	trimmed	other	0.1	4.79	4.58	2.5	8.97	3.11	3.87	4.17
mmu-miR-341-5p-0-0--	10.72	14.56	canonical	other	13.82	19.16	19.45	8.76	11.53	7.27	11.62	13.35
mmu-miR-342-3p-0-0--	1963.98	870.06	canonical	other	782.42	732.84	744.74	752.53	3726.19	1412.08	1337.77	753.65
mmu-miR-342-3p-0-1-A	19.19	0.1	NT tail	A	0.1	0.1	0.1	0.1	38.43	12.46	0.1	6.68
mmu-miR-342-3p-0-1-C	1533.32	560.36	ambiguous tail	C	501.01	408.73	467.89	410.7	3222.79	949	1013.49	428.15
mmu-miR-342-3p-0-1-T	67.51	30.55	NT tail	U	28.36	35.13	21.74	28.8	124.25	37.38	38.72	40.9
mmu-miR-342-3p-0-2-CA	169.69	93.54	ambiguous tail	other	103.98	61.47	88.09	86.4	292.05	123.56	127.78	93.48
mmu-miR-342-3p-0-2-CT	63.52	23.72	NT tail	other	15.27	13.57	18.3	16.28	147.31	29.07	55.18	14.19
mmu-miR-342-3p-1-0--	278.23	130.95	trimmed	other	114.89	98.99	93.81	108.93	477.78	240.88	238.13	116.01
mmu-miR-342-3p-1-1-A	6.88	1.27	ambiguous tail	A	2.18	0.1	0.1	0.1	10.25	6.23	3.87	4.17
mmu-miR-342-3p-1-1-G	27.53	11.63	ambiguous tail	G	5.09	6.39	4.58	6.26	42.27	35.3	35.82	5.01
mmu-miR-342-3p-2-0--	18.25	9.46	trimmed	other	8	9.58	11.44	3.76	33.3	11.42	14.52	10.02
mmu-miR-342-3p-3-0--	9.52	5.5	trimmed	other	0.1	3.99	0.1	0.1	10.25	12.46	23.23	5.84
mmu-miR-344-3p-1-2-0-0--	292.74	371.98	canonical	other	419.57	507.72	401.54	190.32	225.44	323.95	340.73	328.84
mmu-miR-344-3p-1-2-0-1-A	7.85	3.66	NT tail	A	5.82	4.79	2.29	2.5	10.25	8.31	2.9	5.01
mmu-miR-344-3p-1-2-0-1-T	63.2	60.23	NT tail	U	74.9	61.47	58.34	42.57	51.24	84.1	63.89	54.25
mmu-miR-344-3p-1-2-1-0--	9.95	11.53	trimmed	other	20.36	8.78	1.14	1.25	3.84	13.5	26.14	12.52
mmu-miR-344-3p-1-2-1-1-A	4.87	0.41	ambiguous tail	A	0.1	0.8	0.1	0.1	1.28	4.15	0.97	9.18
mmu-miR-344-3p-1-2-1-1-C	5.39	5.03	ambiguous tail	C	2.18	5.59	6.86	3.76	5.12	5.19	6.78	5.84
mmu-miR-344-3p-1-2-2-0--	96.79	115.64	trimmed	other	124.34	129.32	101.82	123.96	105.04	76.83	98.74	108.5
mmu-miR-344-3p-1-2-3-0--	3.64	5.95	trimmed	other	11.63	4.79	1.14	2.5	3.84	6.23	9.68	0.83
mmu-miR-344b-3p-0-0--	80.19	111.36	canonical	other	105.44	118.15	110.97	75.13	43.55	119.4	147.14	77.62
mmu-miR-344b-3p-0-1-A	17.53	18.47	NT tail	A	24.72	19.16	8.01	16.28	14.09	21.8	24.2	16.69
mmu-miR-344b-3p-0-1-T	72.77	89.15	NT tail	U	62.54	84.62	98.38	110.19	52.52	104.87	90.02	60.93
mmu-miR-344b-3p-0-2-AA	2.71	3.58	NT tail	AA	8	5.59	2.29	0.1	1.28	5.19	1.94	1.67
mmu-miR-344b-3p-0-2-TT	14.63	16.02	NT tail	UU	16.72	11.18	20.59	11.27	8.97	24.92	20.33	10.02
mmu-miR-344c-3p-0-0--	12.61	15.92	canonical	other	10.18	15.17	13.73	25.04	23.06	11.42	15.49	3.34
mmu-miR-344c-3p-2-0--	3.19	4.38	trimmed	other	7.27	1.6	1.14	1.25	7.69	1.04	10.65	0.83
mmu-miR-344c-3p-3-0--	9.92	9.1	trimmed	other	7.27	6.39	3.43	10.02	8.97	12.46	18.39	8.35
mmu-miR-344d-3-5p-0-0--	199.63	185.68	canonical	other	167.25	203.57	212.78	192.83	277.96	168.2	151.98	152.73
mmu-miR-344d-3p-1-2-3-0-0--	582.49	447.51	canonical	other	382.49	358.44	275.7	850.19	791.61	477.62	370.74	478.23
mmu-miR-344d-3p-1-2-3-0-1-A	9.31	5.12	NT tail	A	0.1	2.39	11.44	8.76	17.93	4.15	2.9	5.84
mmu-miR-344d-3p-1-2-3-0-1-T	5.41	2.79	NT tail	U	0.1	0.1	6.86	0.1	7.69	5.19	6.78	3.34
mmu-miR-344d-3p-1-2-3-1-0--	1433.16	1499.81	trimmed	other	1264.53	1269.3	1694.26	1967.09	1114.4	1570.94	1303.89	1614.14
mmu-miR-344d-3p-1-2-3-1-1-G	18.44	14.4	ambiguous tail	G	3.64	9.58	5.72	37.56	16.65	31.15	15.49	7.51
mmu-miR-344d-3p-1-2-3-1-1-T	351.67	286.16	ambiguous tail	U	247.23	286.59	268.84	370.63	399.65	349.91	257.49	305.47
[truncated: 1,478 more rows]

## Sheet: Results of analysis in Quagmir
miRNA tailing under Tent2 KO in mice hippocampus
[truncated: 56,668 more rows]
