# Supplementary material
Source: HighWire-hosted journal article supplement (doi:10.1101/rna.080240.124)
Supplement: Supplemental_Table3.xlsx [file Supplemental_Table3.xlsx]

## Sheet: Info
This file contains the summary of results of Illumina and DRS ONT sequencing analysis of WT and Tent2 KO mouse hippocampi.
The respective tabs contain following content:
Illumina Diffexp	Results of differential expression analysis in DESeq2 for Illumina RNAseq data.
Illumina GOdown	Results of GO-term analysis in clusterProfiler R package for upregulated protein coding genes.
Illumina GOup	Results of GO-term analysis in clusterProfiler R package for downregulated protein coding genes.
Illumina DiffAPA	Results of differential APA site analysis in APAlyzer R package for protein coding genes.
Illumina DiffIPA	Results of differential IPA site analysis in APAlyzer R package for protein coding genes.
Illumina APAraw	Results of APA site prediction in APAlyzer R package for protein coding genes.
Illumina IPAraw	Results of IPA site prediction in APAlyzer R package for protein coding genes.
DRS DiffAdenyl transcript	Results of differential adenylation analysis for ONT DRS data. Outputs of Nanopolish polya processed with NanoTail R package. Results grouped per transcript.
DRS DiffAdenyl gene	Results of differential adenylation analysis for ONT DRS data. Outputs of Nanopolish polya processed with NanoTail R package. Results grouped per gene.
DRS Diffexp	Results of differential expression analysis in DESeq2 for ONT DRS data.
For the explanation of column names please refer to manuals of tools that were used to create those tables.

## Sheet: Illumina DiffExp
external_gene_name	baseMean	log2FoldChange	lfcSE	stat	pvalue	padj	baseMean_1	baseMean_2	foldChange	sig	ensembl_gene_id	gene_biotype	regulation	description
Cldn34c1	57.9318	6.02981	0.692422	8.70828	3.08516e-18	1.20771e-13	1.67474	114.189	68.1831	FDR<0.05	ENSMUSG00000079450	protein_coding	upregulated	claudin 34C1 [Source:MGI Symbol;Acc:MGI:1920311]
Gm4735	269.792	3.79711	0.467491	8.12231	4.57411e-16	5.9686e-12	36.4125	503.172	13.8186	FDR<0.05	ENSMUSG00000064193	transcribed_processed_pseudogene	upregulated	predicted gene 4735 [Source:MGI Symbol;Acc:MGI:3645521]
Akr1e1	1031.08	-0.924174	0.113485	-8.14358	3.83759e-16	5.9686e-12	1351.95	710.198	0.525313	FDR<0.05	ENSMUSG00000045410	protein_coding	downregulated	aldo-keto reductase family 1, member E1 [Source:MGI Symbol;Acc:MGI:1914758]
Eno1b	380.203	3.6462	0.451111	8.0827	6.33465e-16	6.19941e-12	56.4233	703.983	12.4768	FDR<0.05	ENSMUSG00000059040	protein_coding	upregulated	enolase 1B, retrotransposed [Source:MGI Symbol;Acc:MGI:3648653]
Gm7993	58.3833	3.47305	0.488366	7.11157	1.14727e-12	8.98218e-09	9.84485	106.922	10.8607	FDR<0.05	ENSMUSG00000107092	processed_pseudogene	upregulated	predicted gene 7993 [Source:MGI Symbol;Acc:MGI:3647399]
Dsc3	255.017	-1.23843	0.174902	-7.08068	1.43446e-12	9.35893e-09	357.644	152.39	0.426094	FDR<0.05	ENSMUSG00000059898	protein_coding	downregulated	desmocollin 3 [Source:MGI Symbol;Acc:MGI:1194993]
Cobl	1668.57	-0.769112	0.120694	-6.37241	1.8608e-10	9.10537e-07	2104.05	1233.08	0.586052	FDR<0.05	ENSMUSG00000020173	protein_coding	downregulated	cordon-bleu WH2 repeat [Source:MGI Symbol;Acc:MGI:105056]
Zfp125	524.092	-0.836324	0.130996	-6.38437	1.72108e-10	9.10537e-07	672.02	376.165	0.559753	FDR<0.05	ENSMUSG00000069755	transcribed_unprocessed_pseudogene	downregulated	zinc finger protein 125 [Source:MGI Symbol;Acc:MGI:1336211]
Rims3	3050.16	-0.552604	0.0889934	-6.2095	5.31532e-10	2.31193e-06	3628.46	2471.86	0.681243	FDR<0.05	ENSMUSG00000032890	protein_coding	downregulated	regulating synaptic membrane exocytosis 3 [Source:MGI Symbol;Acc:MGI:2443331]
Gm10723	529.699	1.12078	0.181334	6.18072	6.38113e-10	2.49796e-06	333.403	725.994	2.17752	FDR<0.05	ENSMUSG00000103345	TEC	upregulated	predicted gene 10723 [Source:MGI Symbol;Acc:MGI:3641783]
Plxdc1	693.849	-0.686595	0.116283	-5.9045	3.53707e-09	1.2014e-05	856.298	531.399	0.620577	FDR<0.05	ENSMUSG00000017417	protein_coding	downregulated	plexin domain containing 1 [Source:MGI Symbol;Acc:MGI:1919574]
Rec8	111.235	-1.90038	0.322216	-5.89784	3.68283e-09	1.2014e-05	175.28	47.1894	0.269223	FDR<0.05	ENSMUSG00000002324	protein_coding	downregulated	REC8 meiotic recombination protein [Source:MGI Symbol;Acc:MGI:1929645]
Vwc2l	1188.3	-0.671901	0.115465	-5.81911	5.91612e-09	1.78148e-05	1460.54	916.065	0.627211	FDR<0.05	ENSMUSG00000045648	protein_coding	downregulated	von Willebrand factor C domain-containing protein 2-like [Source:MGI Symbol;Acc:MGI:2444069]
1700080N15Rik	303.035	1.21899	0.210991	5.77746	7.58369e-09	2.12051e-05	181.748	424.322	2.33467	FDR<0.05	ENSMUSG00000084859	lncRNA	upregulated	RIKEN cDNA 1700080N15 gene [Source:MGI Symbol;Acc:MGI:1920739]
Chrna4	1534.56	-0.539138	0.0954204	-5.65013	1.60324e-08	3.6918e-05	1818.02	1251.1	0.688166	FDR<0.05	ENSMUSG00000027577	protein_coding	downregulated	cholinergic receptor, nicotinic, alpha polypeptide 4 [Source:MGI Symbol;Acc:MGI:87888]
Cplx3	220.148	-1.19241	0.210515	-5.66426	1.47662e-08	3.6918e-05	305.946	134.35	0.439129	FDR<0.05	ENSMUSG00000039714	protein_coding	downregulated	complexin 3 [Source:MGI Symbol;Acc:MGI:2384571]
Rnf227	4474.17	-0.42045	0.0743601	-5.65425	1.56532e-08	3.6918e-05	5122.01	3826.33	0.747037	FDR<0.05	ENSMUSG00000043419	protein_coding	downregulated	ring finger protein 227 [Source:MGI Symbol;Acc:MGI:1915359]
Cbln1	281.863	-1.0381	0.186524	-5.5655	2.61397e-08	5.6848e-05	378.789	184.938	0.488234	FDR<0.05	ENSMUSG00000031654	protein_coding	downregulated	cerebellin 1 precursor protein [Source:MGI Symbol;Acc:MGI:88281]
Gm48260	600.822	1.09528	0.199571	5.48816	4.06142e-08	8.36781e-05	382.609	819.035	2.14066	FDR<0.05	ENSMUSG00000113978	processed_pseudogene	upregulated	predicted gene, 48260 [Source:MGI Symbol;Acc:MGI:6097678]
Cbln4	674.557	-0.718119	0.133334	-5.38587	7.20938e-08	0.000141109	839.084	510.029	0.60784	FDR<0.05	ENSMUSG00000067578	protein_coding	downregulated	cerebellin 4 precursor protein [Source:MGI Symbol;Acc:MGI:2154433]
Zdhhc22	903.798	-0.584847	0.113289	-5.16244	2.43758e-07	0.000454387	1083.23	724.371	0.668717	FDR<0.05	ENSMUSG00000048483	protein_coding	downregulated	zinc finger, DHHC-type containing 22 [Source:MGI Symbol;Acc:MGI:2685108]
Gm38056	639.367	0.912834	0.179495	5.08558	3.66502e-07	0.00065214	443.347	835.386	1.88427	FDR<0.05	ENSMUSG00000102145	TEC	upregulated	predicted gene, 38056 [Source:MGI Symbol;Acc:MGI:5611284]
Gm13230	18.3121	4.04461	0.802279	5.0414	4.6213e-07	0.000786545	2.14833	34.4759	16.0477	FDR<0.05	ENSMUSG00000082082	transcribed_unprocessed_pseudogene	upregulated	predicted gene 13230 [Source:MGI Symbol;Acc:MGI:3651934]
Gm38235	734.162	0.829612	0.165969	4.99858	5.77527e-07	0.000941995	528.512	939.812	1.77822	FDR<0.05	ENSMUSG00000103291	TEC	upregulated	predicted gene, 38235 [Source:MGI Symbol;Acc:MGI:5611463]
Ak9	120.016	1.2938	0.259477	4.98617	6.15886e-07	0.000964378	69.6008	170.432	2.44871	FDR<0.05	ENSMUSG00000091415	protein_coding	upregulated	adenylate kinase 9 [Source:MGI Symbol;Acc:MGI:2685080]
Plcxd2	4504.41	-0.436039	0.0877933	-4.96666	6.81175e-07	0.00102559	5181.05	3827.77	0.738801	FDR<0.05	ENSMUSG00000087141	protein_coding	downregulated	phosphatidylinositol-specific phospholipase C, X domain containing 2 [Source:MGI Symbol;Acc:MGI:3647874]
Gsg1l	1184.45	-0.504002	0.101682	-4.95666	7.17171e-07	0.00103979	1388.52	980.373	0.706056	FDR<0.05	ENSMUSG00000046182	protein_coding	downregulated	GSG1-like [Source:MGI Symbol;Acc:MGI:2685483]
Gm48606	16.7325	4.14809	0.841184	4.93125	8.17039e-07	0.00114228	1.81486	31.6502	17.4395	FDR<0.05	ENSMUSG00000113586	lncRNA	upregulated	predicted gene, 48606 [Source:MGI Symbol;Acc:MGI:6098190]
Lgi2	3898.4	-0.439279	0.0896567	-4.89957	9.60454e-07	0.00129648	4485.82	3310.97	0.738098	FDR<0.05	ENSMUSG00000039252	protein_coding	downregulated	leucine-rich repeat LGI family, member 2 [Source:MGI Symbol;Acc:MGI:2180196]
Necab1	6315.19	-0.398856	0.0822181	-4.8512	1.22716e-06	0.00160128	7181.55	5448.82	0.758725	FDR<0.05	ENSMUSG00000040536	protein_coding	downregulated	N-terminal EF-hand calcium binding protein 1 [Source:MGI Symbol;Acc:MGI:1916602]
Gm48261	685.643	0.933431	0.194422	4.80105	1.57837e-06	0.00199313	470.609	900.677	1.91385	FDR<0.05	ENSMUSG00000113073	TEC	upregulated	predicted gene, 48261 [Source:MGI Symbol;Acc:MGI:6097679]
Satb2	1811.48	-0.550371	0.115601	-4.76094	1.92692e-06	0.00221856	2152.52	1470.45	0.683129	FDR<0.05	ENSMUSG00000038331	protein_coding	downregulated	special AT-rich sequence binding protein 2 [Source:MGI Symbol;Acc:MGI:2679336]
Tenm3	14314.6	-0.308563	0.064807	-4.76126	1.92387e-06	0.00221856	15839	12790.2	0.80751	FDR<0.05	ENSMUSG00000031561	protein_coding	downregulated	teneurin transmembrane protein 3 [Source:MGI Symbol;Acc:MGI:1345183]
Satb1	8423.07	-0.357482	0.0750423	-4.76374	1.9004e-06	0.00221856	9460.87	7385.28	0.780614	FDR<0.05	ENSMUSG00000023927	protein_coding	downregulated	special AT-rich sequence binding protein 1 [Source:MGI Symbol;Acc:MGI:105084]
Dpp10	4396.14	-0.408524	0.086164	-4.74124	2.12417e-06	0.00237579	5015.01	3777.27	0.753192	FDR<0.05	ENSMUSG00000036815	protein_coding	downregulated	dipeptidylpeptidase 10 [Source:MGI Symbol;Acc:MGI:2442409]
A230081H15Rik	580.107	0.918671	0.194538	4.72232	2.3317e-06	0.00253546	400.645	759.568	1.89586	FDR<0.05	ENSMUSG00000112367	TEC	upregulated	Riken cDNA A230081H15 gene [Source:MGI Symbol;Acc:MGI:4437789]
Cit	5858.76	-0.318114	0.0676732	-4.70075	2.59214e-06	0.00274248	6502.09	5215.43	0.802116	FDR<0.05	ENSMUSG00000029516	protein_coding	downregulated	citron [Source:MGI Symbol;Acc:MGI:105313]
Trim66	1322.38	-0.486447	0.105208	-4.62368	3.76993e-06	0.00360339	1542.98	1101.77	0.714053	FDR<0.05	ENSMUSG00000031026	protein_coding	downregulated	tripartite motif-containing 66 [Source:MGI Symbol;Acc:MGI:2152406]
Car12	2624.99	0.570809	0.12346	4.62345	3.77405e-06	0.00360339	2112.19	3137.79	1.48556	FDR<0.05	ENSMUSG00000032373	protein_coding	upregulated	carbonic anhydrase 12 [Source:MGI Symbol;Acc:MGI:1923709]
BC065397	177.253	0.946664	0.204549	4.62806	3.69108e-06	0.00360339	121.36	233.146	1.92112	FDR<0.05	ENSMUSG00000087368	lncRNA	upregulated	cDNA sequence BC065397 [Source:MGI Symbol;Acc:MGI:3584520]
mt-Rnr1	30882.3	-0.524939	0.113439	-4.62751	3.70087e-06	0.00360339	36440.8	25323.9	0.694932	FDR<0.05	ENSMUSG00000064337	Mt_rRNA	downregulated	mitochondrially encoded 12S rRNA [Source:MGI Symbol;Acc:MGI:102493]
Gm13315	223.595	1.15366	0.25062	4.60322	4.16003e-06	0.00387735	138.492	308.699	2.22901	FDR<0.05	ENSMUSG00000083305	processed_pseudogene	upregulated	predicted gene 13315 [Source:MGI Symbol;Acc:MGI:3651096]
Cux2	2429.61	-0.437136	0.0950782	-4.59764	4.27294e-06	0.00388997	2794.6	2064.62	0.738787	FDR<0.05	ENSMUSG00000042589	protein_coding	downregulated	cut-like homeobox 2 [Source:MGI Symbol;Acc:MGI:107321]
Pink1	7866.09	-0.375454	0.0818957	-4.58454	4.54982e-06	0.00404789	8885.75	6846.42	0.770495	FDR<0.05	ENSMUSG00000028756	protein_coding	downregulated	PTEN induced putative kinase 1 [Source:MGI Symbol;Acc:MGI:1916193]
Unc13c	2075.82	-0.486431	0.106649	-4.56106	5.08956e-06	0.00442746	2422.45	1729.19	0.713818	FDR<0.05	ENSMUSG00000062151	protein_coding	downregulated	unc-13 homolog C [Source:MGI Symbol;Acc:MGI:2149021]
Sox2ot	2098.14	0.429859	0.0946091	4.54353	5.53211e-06	0.0046478	1786.77	2409.51	1.34853	FDR<0.05	ENSMUSG00000105265	lncRNA	upregulated	SOX2 overlapping transcript (non-protein coding) [Source:MGI Symbol;Acc:MGI:2444112]
A530058O07Rik	266.888	0.978372	0.21542	4.5417	5.5803e-06	0.0046478	179.179	354.597	1.97901	FDR<0.05	ENSMUSG00000113290	TEC	upregulated	RIKEN cDNA A530058O07 gene [Source:MGI Symbol;Acc:MGI:2145514]
Gm37443	283.219	1.01466	0.223655	4.5367	5.714e-06	0.00466	187.387	379.051	2.02283	FDR<0.05	ENSMUSG00000102581	TEC	upregulated	predicted gene, 37443 [Source:MGI Symbol;Acc:MGI:5610671]
Pla2g5	66.0687	2.13828	0.473472	4.51618	6.29655e-06	0.0050303	24.4163	107.721	4.41184	FDR<0.05	ENSMUSG00000041193	protein_coding	upregulated	phospholipase A2, group V [Source:MGI Symbol;Acc:MGI:101899]
Fap	125.661	1.40327	0.311356	4.50697	6.57602e-06	0.00504754	68.7895	182.533	2.6535	FDR<0.05	ENSMUSG00000000392	protein_coding	upregulated	fibroblast activation protein [Source:MGI Symbol;Acc:MGI:109608]
Gm47591	871.797	0.754108	0.167232	4.50936	6.50223e-06	0.00504754	648.919	1094.67	1.68692	FDR<0.05	ENSMUSG00000112153	lncRNA	upregulated	predicted gene, 47591 [Source:MGI Symbol;Acc:MGI:6096636]
Dzank1	13598.6	-0.304773	0.0680002	-4.48194	7.3968e-06	0.00544627	15031.1	12166	0.809388	FDR<0.05	ENSMUSG00000037259	protein_coding	downregulated	double zinc ribbon and ankyrin repeat domains 1 [Source:MGI Symbol;Acc:MGI:2139080]
Sh3d19	3249.08	0.391155	0.0874776	4.47149	7.76772e-06	0.00544627	2811.17	3686.98	1.31154	FDR<0.05	ENSMUSG00000028082	protein_coding	upregulated	SH3 domain protein D19 [Source:MGI Symbol;Acc:MGI:1350923]
Camk2d	4964.87	-0.472392	0.105661	-4.47084	7.79112e-06	0.00544627	5769.31	4160.43	0.721132	FDR<0.05	ENSMUSG00000053819	protein_coding	downregulated	calcium/calmodulin-dependent protein kinase II, delta [Source:MGI Symbol;Acc:MGI:1341265]
Grik3	3979.35	-0.392882	0.0875851	-4.48572	7.26676e-06	0.00544627	4519.43	3439.27	0.760997	FDR<0.05	ENSMUSG00000001985	protein_coding	downregulated	glutamate receptor, ionotropic, kainate 3 [Source:MGI Symbol;Acc:MGI:95816]
Gm26684	93.3737	1.80059	0.402721	4.47106	7.78334e-06	0.00544627	41.6698	145.078	3.4816	FDR<0.05	ENSMUSG00000097286	lncRNA	upregulated	predicted gene, 26684 [Source:MGI Symbol;Acc:MGI:5477178]
Sgms2	475.684	0.960594	0.215494	4.45763	8.28701e-06	0.00569129	322.713	628.654	1.94803	FDR<0.05	ENSMUSG00000050931	protein_coding	upregulated	sphingomyelin synthase 2 [Source:MGI Symbol;Acc:MGI:1921692]
Gm13187	227.525	1.01774	0.228956	4.44515	8.78309e-06	0.00591552	150.082	304.968	2.03201	FDR<0.05	ENSMUSG00000087355	lncRNA	upregulated	predicted gene 13187 [Source:MGI Symbol;Acc:MGI:3649588]
Fut9	15510.6	-0.310323	0.0699192	-4.43831	9.06686e-06	0.00591552	17173.4	13847.9	0.80636	FDR<0.05	ENSMUSG00000055373	protein_coding	downregulated	fucosyltransferase 9 [Source:MGI Symbol;Acc:MGI:1330859]
Slc17a6	1618.76	-0.593769	0.133684	-4.44157	8.93059e-06	0.00591552	1947.87	1289.65	0.662085	FDR<0.05	ENSMUSG00000030500	protein_coding	downregulated	solute carrier family 17 (sodium-dependent inorganic phosphate cotransporter), member 6 [Source:MGI Symbol;Acc:MGI:2156052]
Sowahb	231.375	-0.827613	0.187356	-4.41734	9.99232e-06	0.00635843	295.909	166.841	0.563823	FDR<0.05	ENSMUSG00000045314	protein_coding	downregulated	sosondowah ankyrin repeat domain family member B [Source:MGI Symbol;Acc:MGI:1925338]
Gm9968	781.374	0.696309	0.157691	4.41565	1.00706e-05	0.00635843	595.859	966.889	1.62268	FDR<0.05	ENSMUSG00000055370	lncRNA	upregulated	predicted gene 9968 [Source:MGI Symbol;Acc:MGI:3642146]
Gm45191	521.135	0.622662	0.141531	4.39947	1.08515e-05	0.00666216	410.105	632.165	1.54147	FDR<0.05	ENSMUSG00000108752	TEC	upregulated	predicted gene 45191 [Source:MGI Symbol;Acc:MGI:5753767]
Gm15713	329.146	0.856522	0.194723	4.39866	1.0892e-05	0.00666216	233.895	424.398	1.81448	FDR<0.05	ENSMUSG00000085499	lncRNA	upregulated	predicted gene 15713 [Source:MGI Symbol;Acc:MGI:3783155]
Gm13312	197.743	1.09966	0.25042	4.39126	1.12694e-05	0.00668413	125.735	269.751	2.14539	FDR<0.05	ENSMUSG00000083633	processed_pseudogene	upregulated	predicted gene 13312 [Source:MGI Symbol;Acc:MGI:3651094]
Zfp985	22.3079	3.15692	0.718416	4.39427	1.11145e-05	0.00668413	4.51888	40.0969	8.87319	FDR<0.05	ENSMUSG00000065999	protein_coding	upregulated	zinc finger protein 985 [Source:MGI Symbol;Acc:MGI:3651986]
Gm47603	337.139	0.816184	0.186163	4.38423	1.16394e-05	0.00680054	243.707	430.57	1.76675	FDR<0.05	ENSMUSG00000113665	TEC	upregulated	predicted gene, 47603 [Source:MGI Symbol;Acc:MGI:6096658]
Dnai3	86.6018	1.78266	0.407144	4.37846	1.19523e-05	0.00688068	39.052	134.152	3.4352	FDR<0.05	ENSMUSG00000043020	protein_coding	upregulated	dynein axonemal intermediate chain 3 [Source:MGI Symbol;Acc:MGI:3045269]
Gm37995	300.892	0.95533	0.21839	4.37443	1.21751e-05	0.00690731	204.557	397.226	1.94188	FDR<0.05	ENSMUSG00000103331	TEC	upregulated	predicted gene, 37995 [Source:MGI Symbol;Acc:MGI:5611223]
Slc31a1	1773.85	0.562443	0.128797	4.3669	1.26025e-05	0.00704769	1431.33	2116.37	1.4786	FDR<0.05	ENSMUSG00000066150	protein_coding	upregulated	solute carrier family 31, member 1 [Source:MGI Symbol;Acc:MGI:1333843]
Lamc2	290.809	-0.79651	0.182629	-4.36135	1.29261e-05	0.00712683	368.914	212.705	0.576572	FDR<0.05	ENSMUSG00000026479	protein_coding	downregulated	laminin, gamma 2 [Source:MGI Symbol;Acc:MGI:99913]
Mageb16-ps1	51.451	1.6344	0.376614	4.33972	1.42666e-05	0.00775669	24.9776	77.9243	3.11977	FDR<0.05	ENSMUSG00000082106	processed_pseudogene	upregulated	MAGE family member B16, pseudogene 1 [Source:MGI Symbol;Acc:MGI:3644898]
Bmp3	877.071	-0.593354	0.137922	-4.30209	1.69193e-05	0.00907293	1054.49	699.65	0.663494	FDR<0.05	ENSMUSG00000029335	protein_coding	downregulated	bone morphogenetic protein 3 [Source:MGI Symbol;Acc:MGI:88179]
Itpripl1	184.509	1.18189	0.275261	4.29369	1.75725e-05	0.00929584	112.49	256.527	2.28043	FDR<0.05	ENSMUSG00000074825	protein_coding	upregulated	inositol 1,4,5-triphosphate receptor interacting protein-like 1 [Source:MGI Symbol;Acc:MGI:1920588]
Fbxo2	1812.69	-0.391303	0.0913463	-4.28373	1.83784e-05	0.00934337	2057.02	1568.37	0.762446	FDR<0.05	ENSMUSG00000041556	protein_coding	downregulated	F-box protein 2 [Source:MGI Symbol;Acc:MGI:2446216]
Gm43776	195.996	1.06321	0.248191	4.28382	1.83711e-05	0.00934337	126.831	265.16	2.09065	FDR<0.05	ENSMUSG00000105946	TEC	upregulated	predicted gene 43776 [Source:MGI Symbol;Acc:MGI:5663913]
Olfm2	1333.41	-0.435504	0.101662	-4.28385	1.83684e-05	0.00934337	1532.61	1134.21	0.74005	FDR<0.05	ENSMUSG00000032172	protein_coding	downregulated	olfactomedin 2 [Source:MGI Symbol;Acc:MGI:3045350]
Gm47024	359.704	0.955743	0.223944	4.26778	1.97432e-05	0.00990853	244.453	474.956	1.94293	FDR<0.05	ENSMUSG00000112287	TEC	upregulated	predicted gene, 47024 [Source:MGI Symbol;Acc:MGI:6095713]
Zfp990	88.2662	4.1292	0.974721	4.23628	2.27251e-05	0.0112607	9.60733	166.925	17.3748	FDR<0.05	ENSMUSG00000078503	protein_coding	upregulated	zinc finger protein 990 [Source:MGI Symbol;Acc:MGI:3652161]
Gm37437	292.833	0.830442	0.196384	4.22866	2.35085e-05	0.0115033	210.176	375.491	1.78656	FDR<0.05	ENSMUSG00000102673	TEC	upregulated	predicted gene, 37437 [Source:MGI Symbol;Acc:MGI:5610665]
Bcap29	1837.58	-0.509243	0.121265	-4.19943	2.67585e-05	0.0129319	2158.25	1516.9	0.702839	FDR<0.05	ENSMUSG00000020650	protein_coding	downregulated	B cell receptor associated protein 29 [Source:MGI Symbol;Acc:MGI:101917]
Pon3	192.249	1.20282	0.286734	4.19491	2.72979e-05	0.0130318	116.401	268.097	2.30322	FDR<0.05	ENSMUSG00000029759	protein_coding	upregulated	paraoxonase 3 [Source:MGI Symbol;Acc:MGI:106686]
Fhod3	1313.72	-0.452348	0.108565	-4.1666	3.09173e-05	0.0145818	1517.77	1109.67	0.731119	FDR<0.05	ENSMUSG00000034295	protein_coding	downregulated	formin homology 2 domain containing 3 [Source:MGI Symbol;Acc:MGI:1925847]
Hlf	11495.2	-0.322214	0.0774922	-4.15802	3.2102e-05	0.0149603	12775.4	10215.1	0.799596	FDR<0.05	ENSMUSG00000003949	protein_coding	downregulated	hepatic leukemia factor [Source:MGI Symbol;Acc:MGI:96108]
Gm45461	313.318	0.845364	0.204592	4.13195	3.59698e-05	0.0165656	223.616	403.021	1.80229	FDR<0.05	ENSMUSG00000109744	TEC	upregulated	predicted gene 45461 [Source:MGI Symbol;Acc:MGI:5791297]
Etl4	7584.15	-0.2984	0.0723804	-4.12266	3.74527e-05	0.0168062	8366.16	6802.15	0.813055	FDR<0.05	ENSMUSG00000036617	protein_coding	downregulated	enhancer trap locus 4 [Source:MGI Symbol;Acc:MGI:95454]
Gpr26	16710.2	-0.30517	0.0739939	-4.12426	3.71927e-05	0.0168062	18470.8	14949.6	0.809365	FDR<0.05	ENSMUSG00000040125	protein_coding	downregulated	G protein-coupled receptor 26 [Source:MGI Symbol;Acc:MGI:2441758]
Gm48259	147.375	1.13842	0.276272	4.12065	3.77802e-05	0.0168062	91.7113	203.039	2.2139	FDR<0.05	ENSMUSG00000113810	TEC	upregulated	predicted gene, 48259 [Source:MGI Symbol;Acc:MGI:6097676]
4930419G24Rik	402.255	0.899364	0.218787	4.11069	3.94473e-05	0.0173506	280.608	523.901	1.86702	FDR<0.05	ENSMUSG00000087625	lncRNA	upregulated	RIKEN cDNA 4930419G24 gene [Source:MGI Symbol;Acc:MGI:1921124]
Msx1	249.393	0.883299	0.215313	4.10239	4.089e-05	0.0177853	175.125	323.661	1.84817	FDR<0.05	ENSMUSG00000048450	protein_coding	upregulated	msh homeobox 1 [Source:MGI Symbol;Acc:MGI:97168]
Sowahc	1058.61	0.508438	0.124063	4.09822	4.16335e-05	0.0179097	873.239	1243.98	1.42456	FDR<0.05	ENSMUSG00000098188	protein_coding	upregulated	sosondowah ankyrin repeat domain family member C [Source:MGI Symbol;Acc:MGI:3606051]
Gpr88	361.704	-0.86594	0.212595	-4.07319	4.63726e-05	0.0197315	466.204	257.203	0.551695	FDR<0.05	ENSMUSG00000068696	protein_coding	downregulated	G-protein coupled receptor 88 [Source:MGI Symbol;Acc:MGI:1927653]
Hivep1	4391.23	-0.347469	0.0856088	-4.0588	4.93255e-05	0.0207623	4918.36	3864.1	0.785648	FDR<0.05	ENSMUSG00000021366	protein_coding	downregulated	human immunodeficiency virus type I enhancer binding protein 1 [Source:MGI Symbol;Acc:MGI:96100]
Gm48225	510.548	0.671096	0.165463	4.05587	4.99479e-05	0.0208006	393.853	627.244	1.59258	FDR<0.05	ENSMUSG00000112637	TEC	upregulated	predicted gene, 48225 [Source:MGI Symbol;Acc:MGI:6097625]
Odc1	2095.35	-0.349474	0.0866834	-4.03161	5.5395e-05	0.0228263	2346.92	1843.78	0.785616	FDR<0.05	ENSMUSG00000011179	protein_coding	downregulated	ornithine decarboxylase, structural 1 [Source:MGI Symbol;Acc:MGI:97402]
Tent5c	313.862	0.778875	0.193492	4.02537	5.68866e-05	0.0231967	230.668	397.057	1.72133	FDR<0.05	ENSMUSG00000044468	protein_coding	upregulated	terminal nucleotidyltransferase 5C [Source:MGI Symbol;Acc:MGI:1921895]
Klf5	884.363	-0.43665	0.108867	-4.01086	6.04991e-05	0.0244154	1016.79	751.931	0.739511	FDR<0.05	ENSMUSG00000005148	protein_coding	downregulated	Kruppel-like transcription factor 5 [Source:MGI Symbol;Acc:MGI:1338056]
Gm37255	175.879	0.995288	0.249143	3.99485	6.47344e-05	0.024844	117.23	234.528	2.00059	FDR<0.05	ENSMUSG00000104449	TEC	upregulated	predicted gene, 37255 [Source:MGI Symbol;Acc:MGI:5610483]
Cacnb4	13001	-0.29639	0.0741621	-3.99652	6.42808e-05	0.024844	14331.1	11670.9	0.814373	FDR<0.05	ENSMUSG00000017412	protein_coding	downregulated	calcium channel, voltage-dependent, beta 4 subunit [Source:MGI Symbol;Acc:MGI:103301]
Gm42841	468.523	0.832601	0.208222	3.99862	6.37137e-05	0.024844	336.422	600.625	1.78533	FDR<0.05	ENSMUSG00000106528	TEC	upregulated	predicted gene 42841 [Source:MGI Symbol;Acc:MGI:5662978]
Gm42822	528.741	0.715637	0.178987	3.99827	6.3807e-05	0.024844	399.699	657.783	1.6457	FDR<0.05	ENSMUSG00000106596	TEC	upregulated	predicted gene 42822 [Source:MGI Symbol;Acc:MGI:5662959]
Peg13	12705.7	-0.268574	0.0671569	-3.99919	6.35583e-05	0.024844	13884.6	11526.8	0.830183	FDR<0.05	ENSMUSG00000106847	lncRNA	downregulated	paternally expressed 13 [Source:MGI Symbol;Acc:MGI:2663476]
Nxph3	766.355	-0.583993	0.146287	-3.99211	6.54881e-05	0.0248893	920.685	612.024	0.664748	FDR<0.05	ENSMUSG00000046719	protein_coding	downregulated	neurexophilin 3 [Source:MGI Symbol;Acc:MGI:1336188]
Efhd2	4439.4	-0.319386	0.0801869	-3.98302	6.80448e-05	0.0255172	4930.49	3948.3	0.800793	FDR<0.05	ENSMUSG00000040659	protein_coding	downregulated	EF hand domain containing 2 [Source:MGI Symbol;Acc:MGI:106504]
Eno1	16521.3	-0.300806	0.075574	-3.98029	6.88319e-05	0.0255172	18239.4	14803.2	0.811606	FDR<0.05	ENSMUSG00000063524	protein_coding	downregulated	enolase 1, alpha non-neuron [Source:MGI Symbol;Acc:MGI:95393]
Rcan2	6174.59	-0.280362	0.0704538	-3.97938	6.90957e-05	0.0255172	6772.37	5576.82	0.823466	FDR<0.05	ENSMUSG00000039601	protein_coding	downregulated	regulator of calcineurin 2 [Source:MGI Symbol;Acc:MGI:1858219]
2610011E03Rik	348.943	0.886421	0.223305	3.96956	7.20059e-05	0.0263434	244.89	452.996	1.8498	FDR<0.05	ENSMUSG00000104936	TEC	upregulated	RIKEN cDNA 2610011E03 gene [Source:MGI Symbol;Acc:MGI:1919710]
Ass1	861.464	-0.446122	0.112756	-3.95653	7.60466e-05	0.0275641	994.104	728.825	0.733148	FDR<0.05	ENSMUSG00000076441	protein_coding	downregulated	argininosuccinate synthetase 1 [Source:MGI Symbol;Acc:MGI:88090]
Gm45179	717.698	0.699693	0.176972	3.9537	7.69519e-05	0.0276363	546.211	889.186	1.62792	FDR<0.05	ENSMUSG00000108956	TEC	upregulated	predicted gene 45179 [Source:MGI Symbol;Acc:MGI:5753755]
Nrep	4207.87	-0.373273	0.0945319	-3.94864	7.85953e-05	0.0279699	4748.67	3667.08	0.772235	FDR<0.05	ENSMUSG00000042834	protein_coding	downregulated	neuronal regeneration related protein [Source:MGI Symbol;Acc:MGI:99444]
A530083M17Rik	246.03	0.996399	0.252504	3.94607	7.94455e-05	0.0280178	164.206	327.854	1.99661	FDR<0.05	ENSMUSG00000106024	TEC	upregulated	RIKEN cDNA A530083M17 gene [Source:MGI Symbol;Acc:MGI:2444172]
Nid2	331.467	0.826987	0.209699	3.94369	8.02378e-05	0.0280445	238.639	424.295	1.77798	FDR<0.05	ENSMUSG00000021806	protein_coding	upregulated	nidogen 2 [Source:MGI Symbol;Acc:MGI:1298229]
Gm47592	287.507	0.823883	0.209431	3.93391	8.35756e-05	0.0289527	207.406	367.608	1.77241	FDR<0.05	ENSMUSG00000112015	TEC	upregulated	predicted gene, 47592 [Source:MGI Symbol;Acc:MGI:6096638]
C230071H17Rik	265.64	0.826284	0.210219	3.93058	8.47402e-05	0.0290986	191.551	339.729	1.77357	FDR<0.05	ENSMUSG00000106570	TEC	upregulated	RIKEN cDNA C230071H17 gene [Source:MGI Symbol;Acc:MGI:2444463]
Tatdn3	812.503	0.640449	0.163505	3.91701	8.96531e-05	0.0305179	634.223	990.783	1.5622	FDR<0.05	ENSMUSG00000026632	protein_coding	upregulated	TatD DNase domain containing 3 [Source:MGI Symbol;Acc:MGI:1916222]
Plcl2	6967.63	-0.265639	0.0679049	-3.91193	9.1561e-05	0.0308987	7608.42	6326.84	0.831557	FDR<0.05	ENSMUSG00000038910	protein_coding	downregulated	phospholipase C-like 2 [Source:MGI Symbol;Acc:MGI:1352756]
Gm37382	227.323	0.929225	0.237857	3.90666	9.35794e-05	0.0310446	156.451	298.195	1.906	FDR<0.05	ENSMUSG00000102831	TEC	upregulated	predicted gene, 37382 [Source:MGI Symbol;Acc:MGI:5610610]
Meis2	2657.38	-0.411753	0.105392	-3.90689	9.34925e-05	0.0310446	3034.58	2280.18	0.751399	FDR<0.05	ENSMUSG00000027210	protein_coding	downregulated	Meis homeobox 2 [Source:MGI Symbol;Acc:MGI:108564]
Stra6	360.167	0.633451	0.162335	3.90212	9.53545e-05	0.0311583	281.848	438.486	1.55576	FDR<0.05	ENSMUSG00000032327	protein_coding	upregulated	stimulated by retinoic acid gene 6 [Source:MGI Symbol;Acc:MGI:107742]
Gm54542	376.994	0.616592	0.158031	3.90171	9.55142e-05	0.0311583	297.246	456.743	1.53658	FDR<0.05	ENSMUSG00000117546	TEC	upregulated	predicted gene, 54542 [Source:MGI Symbol;Acc:MGI:6845563]
Lmx1a	35.9671	2.02047	0.519449	3.88965	0.000100391	0.0324785	14.1927	57.7415	4.0684	FDR<0.05	ENSMUSG00000026686	protein_coding	upregulated	LIM homeobox transcription factor 1 alpha [Source:MGI Symbol;Acc:MGI:1888519]
Mef2c	15152.4	-0.343197	0.0885197	-3.87706	0.000105725	0.0339238	16944.8	13360	0.788442	FDR<0.05	ENSMUSG00000005583	protein_coding	downregulated	myocyte enhancer factor 2C [Source:MGI Symbol;Acc:MGI:99458]
4930428E07Rik	206.759	1.01381	0.261801	3.87247	0.00010774	0.0342893	136.627	276.891	2.02663	FDR<0.05	ENSMUSG00000112967	lncRNA	upregulated	RIKEN cDNA 4930428E07 gene [Source:MGI Symbol;Acc:MGI:1921117]
Gm42843	1029.44	0.618538	0.160816	3.84624	0.000119943	0.0378652	811.182	1247.69	1.53812	FDR<0.05	ENSMUSG00000105293	TEC	upregulated	predicted gene 42843 [Source:MGI Symbol;Acc:MGI:5662980]
Plch1	870.337	-0.536185	0.139527	-3.84289	0.000121596	0.0380799	1029.67	711.003	0.690514	FDR<0.05	ENSMUSG00000036834	protein_coding	downregulated	phospholipase C, eta 1 [Source:MGI Symbol;Acc:MGI:2683547]
Fbxo44	2759.62	-0.313978	0.0817549	-3.84049	0.000122791	0.038149	3059.67	2459.56	0.803866	FDR<0.05	ENSMUSG00000029001	protein_coding	downregulated	F-box protein 44 [Source:MGI Symbol;Acc:MGI:1354744]
H4c12	453.79	-0.529499	0.138108	-3.83396	0.000126096	0.0388672	536.904	370.676	0.690394	FDR<0.05	ENSMUSG00000064288	protein_coding	downregulated	H4 clustered histone 12 [Source:MGI Symbol;Acc:MGI:2448439]
Tshz3	1784.06	-0.436933	0.114029	-3.83177	0.000127224	0.0389087	2052.32	1515.8	0.738578	FDR<0.05	ENSMUSG00000021217	protein_coding	downregulated	teashirt zinc finger family member 3 [Source:MGI Symbol;Acc:MGI:2442819]
Gm43670	761.1	0.659564	0.172545	3.82256	0.000132075	0.0400791	589.187	933.012	1.58356	FDR<0.05	ENSMUSG00000106539	TEC	upregulated	predicted gene 43670 [Source:MGI Symbol;Acc:MGI:5663807]
Elmo1	3204.57	-0.299363	0.0787312	-3.80235	0.000143332	0.0431606	3535.43	2873.72	0.812834	FDR<0.05	ENSMUSG00000041112	protein_coding	downregulated	engulfment and cell motility 1 [Source:MGI Symbol;Acc:MGI:2153044]
Zfp385a	1528.95	-0.361019	0.0957876	-3.76896	0.000163931	0.0488957	1719.76	1338.15	0.778102	FDR<0.05	ENSMUSG00000000552	protein_coding	downregulated	zinc finger protein 385A [Source:MGI Symbol;Acc:MGI:1352495]
Rtl8c	1045.3	-0.379759	0.100798	-3.76752	0.000164876	0.0488957	1182.74	907.866	0.767595	FDR<0.05	ENSMUSG00000051851	protein_coding	downregulated	retrotransposon Gag like 8C [Source:MGI Symbol;Acc:MGI:1920115]
Camk2n1	32858.8	-0.274065	0.0727886	-3.76521	0.000166408	0.048979	35970.6	29747.1	0.826983	FDR<0.05	ENSMUSG00000046447	protein_coding	downregulated	calcium/calmodulin-dependent protein kinase II inhibitor 1 [Source:MGI Symbol;Acc:MGI:1913509]
Gm43830	234.425	0.929013	0.246913	3.76251	0.000168215	0.0491414	161.01	307.84	1.91193	FDR<0.05	ENSMUSG00000105454	TEC	upregulated	predicted gene 43830 [Source:MGI Symbol;Acc:MGI:5663967]
Kcnf1	3053.63	-0.436863	0.116494	-3.75009	0.00017677	0.0508646	3513.69	2593.58	0.738134	Not Sig	ENSMUSG00000051726	protein_coding	nonsignificant	potassium voltage-gated channel, subfamily F, member 1 [Source:MGI Symbol;Acc:MGI:2687399]
Tc2n	91.147	1.57731	0.420562	3.75048	0.000176498	0.0508646	45.706	136.588	2.98841	Not Sig	ENSMUSG00000021187	protein_coding	nonsignificant	tandem C2 domains, nuclear [Source:MGI Symbol;Acc:MGI:1921663]
4933413L06Rik	255.3	0.928063	0.247593	3.74834	0.000178012	0.0508646	175.634	334.965	1.90717	Not Sig	ENSMUSG00000079048	lncRNA	nonsignificant	RIKEN cDNA 4933413L06 gene [Source:MGI Symbol;Acc:MGI:1918350]
Gm10848	226.141	1.05402	0.281419	3.74539	0.000180111	0.0510914	146.958	305.325	2.07763	Not Sig	ENSMUSG00000104106	lncRNA	nonsignificant	predicted gene 10848 [Source:MGI Symbol;Acc:MGI:3641917]
Wfdc2	20.5433	2.69296	0.722134	3.72917	0.000192114	0.0526935	5.58468	35.5019	6.35701	Not Sig	ENSMUSG00000017723	protein_coding	nonsignificant	WAP four-disulfide core domain 2 [Source:MGI Symbol;Acc:MGI:1914951]
Zfp534	5.163	5.98904	1.60342	3.73516	0.000187593	0.0526935	0	10.326	Inf	Not Sig	ENSMUSG00000062518	protein_coding	nonsignificant	zinc finger protein 534 [Source:MGI Symbol;Acc:MGI:3650650]
Gm38217	213.064	0.913173	0.244721	3.73149	0.000190354	0.0526935	147.731	278.397	1.88448	Not Sig	ENSMUSG00000103552	TEC	nonsignificant	predicted gene, 38217 [Source:MGI Symbol;Acc:MGI:5611445]
Prl	24.6461	-3.20174	0.85864	-3.72885	0.000192358	0.0526935	44.2726	5.01974	0.113383	Not Sig	ENSMUSG00000021342	protein_coding	nonsignificant	prolactin [Source:MGI Symbol;Acc:MGI:97762]
Adcy8	1891.8	-0.336731	0.0903085	-3.72868	0.000192489	0.0526935	2111.28	1672.33	0.792094	Not Sig	ENSMUSG00000022376	protein_coding	nonsignificant	adenylate cyclase 8 [Source:MGI Symbol;Acc:MGI:1341110]
4930545L23Rik	256.839	0.762139	0.205632	3.70632	0.000210293	0.0570189	190.44	323.237	1.69732	Not Sig	ENSMUSG00000085247	lncRNA	nonsignificant	RIKEN cDNA 4930545L23 gene [Source:MGI Symbol;Acc:MGI:1926055]
Gm44675	1040.14	0.623997	0.16841	3.70523	0.000211203	0.0570189	817.781	1262.49	1.5438	Not Sig	ENSMUSG00000109370	TEC	nonsignificant	predicted gene 44675 [Source:MGI Symbol;Acc:MGI:5753251]
Gm43502	182.85	1.0129	0.273621	3.70185	0.000214032	0.057387	121.4	244.3	2.01236	Not Sig	ENSMUSG00000106537	TEC	nonsignificant	predicted gene 43502 [Source:MGI Symbol;Acc:MGI:5663639]
Gm48743	159.415	0.976413	0.264146	3.69649	0.000218605	0.0577965	107.343	211.486	1.97019	Not Sig	ENSMUSG00000111077	TEC	nonsignificant	predicted gene, 48743 [Source:MGI Symbol;Acc:MGI:6098412]
Cbln2	693.86	-0.549033	0.148593	-3.69488	0.000219989	0.0577965	825.756	561.964	0.680545	Not Sig	ENSMUSG00000024647	protein_coding	nonsignificant	cerebellin 2 precursor protein [Source:MGI Symbol;Acc:MGI:88282]
Gabra3	3781.45	-0.341005	0.092258	-3.69621	0.00021884	0.0577965	4227.82	3335.08	0.788842	Not Sig	ENSMUSG00000031343	protein_coding	nonsignificant	gamma-aminobutyric acid type A receptor subunit alpha 3 [Source:MGI Symbol;Acc:MGI:95615]
Dock3	17261.1	-0.232666	0.0630033	-3.69292	0.000221696	0.0578568	18650.2	15872	0.851038	Not Sig	ENSMUSG00000039716	protein_coding	nonsignificant	dedicator of cyto-kinesis 3 [Source:MGI Symbol;Acc:MGI:2429763]
Flrt1	2312.62	-0.335975	0.0913003	-3.67988	0.000233341	0.0604924	2581.22	2044.03	0.791886	Not Sig	ENSMUSG00000047787	protein_coding	nonsignificant	fibronectin leucine rich transmembrane protein 1 [Source:MGI Symbol;Acc:MGI:3026647]
Gm36988	199.314	0.964707	0.262554	3.67432	0.000238486	0.0606218	134.994	263.634	1.95294	Not Sig	ENSMUSG00000102494	lncRNA	nonsignificant	predicted gene, 36988 [Source:MGI Symbol;Acc:MGI:5610216]
Ttc21a	143.778	0.962606	0.261903	3.67542	0.000237455	0.0606218	97.7083	189.847	1.943	Not Sig	ENSMUSG00000032514	protein_coding	nonsignificant	tetratricopeptide repeat domain 21A [Source:MGI Symbol;Acc:MGI:1921302]
Alas2	512.026	0.644626	0.175426	3.67463	0.000238192	0.0606218	398.802	625.25	1.56782	Not Sig	ENSMUSG00000025270	protein_coding	nonsignificant	aminolevulinic acid synthase 2, erythroid [Source:MGI Symbol;Acc:MGI:87990]
Gm13314	96.2819	1.11154	0.303051	3.66784	0.000244612	0.0608755	60.8158	131.748	2.16634	Not Sig	ENSMUSG00000081008	processed_pseudogene	nonsignificant	predicted gene 13314 [Source:MGI Symbol;Acc:MGI:3651092]
Gm7452	278.123	0.766377	0.208914	3.66839	0.000244085	0.0608755	205.657	350.59	1.70473	Not Sig	ENSMUSG00000107310	transcribed_processed_pseudogene	nonsignificant	predicted pseudogene 7452 [Source:MGI Symbol;Acc:MGI:3645151]
Silc1	2587.64	-0.400267	0.109032	-3.67108	0.000241524	0.0608755	2943.68	2231.61	0.758102	Not Sig	ENSMUSG00000094002	lncRNA	nonsignificant	sciatic injury induced lincRNA upregulator of SOX11 [Source:MGI Symbol;Acc:MGI:3643118]
Gm31019	213.369	0.87668	0.239093	3.6667	0.000245704	0.0608755	149.888	276.851	1.84705	Not Sig	ENSMUSG00000118315	lncRNA	nonsignificant	predicted gene, 31019 [Source:MGI Symbol;Acc:MGI:5590178]
Kcnip3	2834.07	-0.298886	0.0816336	-3.66131	0.000250926	0.0613921	3126.25	2541.89	0.81308	Not Sig	ENSMUSG00000079056	protein_coding	nonsignificant	Kv channel interacting protein 3, calsenilin [Source:MGI Symbol;Acc:MGI:1929258]
Gm47493	652.415	0.624862	0.170608	3.66256	0.000249704	0.0613921	513.019	791.81	1.54343	Not Sig	ENSMUSG00000112947	TEC	nonsignificant	predicted gene, 47493 [Source:MGI Symbol;Acc:MGI:6096474]
Cckbr	454.656	-0.639785	0.174918	-3.65763	0.000254561	0.0618947	554.056	355.256	0.641191	Not Sig	ENSMUSG00000030898	protein_coding	nonsignificant	cholecystokinin B receptor [Source:MGI Symbol;Acc:MGI:99479]
Tbr1	3666	-0.30122	0.0828011	-3.63787	0.000274897	0.0653112	4047.25	3284.74	0.811597	Not Sig	ENSMUSG00000035033	protein_coding	nonsignificant	T-box brain transcription factor 1 [Source:MGI Symbol;Acc:MGI:107404]
Gm45265	662.31	0.692351	0.190301	3.63819	0.000274561	0.0653112	505.902	818.717	1.61833	Not Sig	ENSMUSG00000109725	TEC	nonsignificant	predicted gene 45265 [Source:MGI Symbol;Acc:MGI:5791101]
Glp2r	304.604	0.79366	0.218068	3.6395	0.00027317	0.0653112	222.906	386.301	1.73302	Not Sig	ENSMUSG00000049928	protein_coding	nonsignificant	glucagon-like peptide 2 receptor [Source:MGI Symbol;Acc:MGI:2136733]
Sgtb	6678.28	-0.267616	0.0735711	-3.63751	0.000275286	0.0653112	7295.06	6061.5	0.830904	Not Sig	ENSMUSG00000042743	protein_coding	nonsignificant	small glutamine-rich tetratricopeptide repeat (TPR)-containing, beta [Source:MGI Symbol;Acc:MGI:2444615]
Gm43186	235.448	0.783422	0.215482	3.63567	0.000277261	0.0653834	172.613	298.283	1.72805	Not Sig	ENSMUSG00000105598	TEC	nonsignificant	predicted gene 43186 [Source:MGI Symbol;Acc:MGI:5663323]
Sh2d5	2089.67	-0.320829	0.0884411	-3.6276	0.000286063	0.0670553	2321.35	1857.99	0.800392	Not Sig	ENSMUSG00000045349	protein_coding	nonsignificant	SH2 domain containing 5 [Source:MGI Symbol;Acc:MGI:2446215]
Gm37788	259.328	0.932946	0.257899	3.61748	0.000297487	0.068102	177.848	340.808	1.91629	Not Sig	ENSMUSG00000102326	TEC	nonsignificant	predicted gene, 37788 [Source:MGI Symbol;Acc:MGI:5611016]
Pamr1	628.204	-0.559052	0.154469	-3.61918	0.000295543	0.068102	749.052	507.355	0.677329	Not Sig	ENSMUSG00000027188	protein_coding	nonsignificant	peptidase domain containing associated with muscle regeneration 1 [Source:MGI Symbol;Acc:MGI:2445082]
Gm45516	204.412	0.906467	0.250322	3.6212	0.000293245	0.068102	142.007	266.817	1.8789	Not Sig	ENSMUSG00000110308	TEC	nonsignificant	predicted gene 45516 [Source:MGI Symbol;Acc:MGI:5791352]
Gm48692	929.288	0.594304	0.164282	3.61758	0.000297368	0.068102	739.659	1118.92	1.51275	Not Sig	ENSMUSG00000114153	TEC	nonsignificant	predicted gene, 48692 [Source:MGI Symbol;Acc:MGI:6098321]
Gm2639	206.876	0.777318	0.215004	3.61536	0.000299929	0.0681873	152.278	261.475	1.71709	Not Sig	ENSMUSG00000086458	processed_pseudogene	nonsignificant	predicted gene 2639 [Source:MGI Symbol;Acc:MGI:3780807]
Tmsb10	4071.12	-0.284115	0.0786121	-3.61414	0.000301344	0.0681873	4470.63	3671.62	0.821276	Not Sig	ENSMUSG00000079523	protein_coding	nonsignificant	thymosin beta 10 [Source:MGI Symbol;Acc:MGI:109146]
Col4a3	116.488	1.30348	0.361879	3.60198	0.000315809	0.0688588	67.0386	165.938	2.47526	Not Sig	ENSMUSG00000079465	protein_coding	nonsignificant	collagen, type IV, alpha 3 [Source:MGI Symbol;Acc:MGI:104688]
Gm38381	272.673	0.818625	0.226811	3.60929	0.000307042	0.0688588	197.242	348.103	1.76485	Not Sig	ENSMUSG00000102594	TEC	nonsignificant	predicted gene, 38381 [Source:MGI Symbol;Acc:MGI:5611609]
Gm14021	113.107	0.975843	0.271029	3.60052	0.000317585	0.0688588	76.3027	149.912	1.9647	Not Sig	ENSMUSG00000081264	processed_pseudogene	nonsignificant	predicted gene 14021 [Source:MGI Symbol;Acc:MGI:3651447]
Arhgap32	19440.9	-0.249998	0.0694004	-3.60226	0.000315462	0.0688588	21121.5	17760.4	0.840866	Not Sig	ENSMUSG00000041444	protein_coding	nonsignificant	Rho GTPase activating protein 32 [Source:MGI Symbol;Acc:MGI:2450166]
Gm20063	58.4264	-1.48938	0.413732	-3.59986	0.000318383	0.0688588	86.0813	30.7715	0.35747	Not Sig	ENSMUSG00000113429	lncRNA	nonsignificant	predicted gene, 20063 [Source:MGI Symbol;Acc:MGI:5012248]
Gm48890	346.015	0.757234	0.210317	3.60045	0.000317671	0.0688588	256.941	435.09	1.69335	Not Sig	ENSMUSG00000113984	TEC	nonsignificant	predicted gene, 48890 [Source:MGI Symbol;Acc:MGI:6098652]
Gm48600	220.871	1.02286	0.283523	3.60767	0.000308958	0.0688588	145.574	296.167	2.03447	Not Sig	ENSMUSG00000114267	TEC	nonsignificant	predicted gene, 48600 [Source:MGI Symbol;Acc:MGI:6098178]
Gm10513	134.218	0.85687	0.237622	3.60603	0.000310922	0.0688588	95.7113	172.726	1.80465	Not Sig	ENSMUSG00000104466	TEC	nonsignificant	predicted gene 10513 [Source:MGI Symbol;Acc:MGI:3641888]
Syt2	2653.22	-0.424136	0.117997	-3.59445	0.000325075	0.0697194	3040.04	2266.4	0.745517	Not Sig	ENSMUSG00000026452	protein_coding	nonsignificant	synaptotagmin II [Source:MGI Symbol;Acc:MGI:99666]
Gm44829	2162.45	0.463599	0.129001	3.59377	0.000325925	0.0697194	1816.58	2508.33	1.38079	Not Sig	ENSMUSG00000109157	TEC	nonsignificant	predicted gene 44829 [Source:MGI Symbol;Acc:MGI:5753405]
Gm37211	796.543	0.58768	0.164268	3.57758	0.000346794	0.0737804	635.692	957.394	1.50607	Not Sig	ENSMUSG00000104027	TEC	nonsignificant	predicted gene, 37211 [Source:MGI Symbol;Acc:MGI:5610439]
Gm43323	22.2335	2.22166	0.621709	3.57348	0.000352271	0.0745406	7.89578	36.5712	4.63174	Not Sig	ENSMUSG00000107390	TEC	nonsignificant	predicted gene 43323 [Source:MGI Symbol;Acc:MGI:5663460]
Gm45635	287.241	0.888786	0.248937	3.57032	0.000356543	0.0750388	200.952	373.529	1.8588	Not Sig	ENSMUSG00000109963	TEC	nonsignificant	predicted gene 45635 [Source:MGI Symbol;Acc:MGI:5791471]
Gm43165	227.506	0.817748	0.229155	3.56853	0.000358984	0.0751487	164.477	290.536	1.76643	Not Sig	ENSMUSG00000106729	TEC	nonsignificant	predicted gene 43165 [Source:MGI Symbol;Acc:MGI:5663302]
Fermt1	144.322	-0.880786	0.247075	-3.56486	0.000364057	0.0754042	186.622	102.022	0.546676	Not Sig	ENSMUSG00000027356	protein_coding	nonsignificant	fermitin family member 1 [Source:MGI Symbol;Acc:MGI:2443583]
Gm29650	152.336	0.861585	0.241686	3.5649	0.000364	0.0754042	108.611	196.061	1.80517	Not Sig	ENSMUSG00000099876	lncRNA	nonsignificant	predicted gene 29650 [Source:MGI Symbol;Acc:MGI:5580356]
Gm37661	168.07	1.15005	0.322758	3.5632	0.000366359	0.0754814	104.391	231.749	2.22001	Not Sig	ENSMUSG00000104462	TEC	nonsignificant	predicted gene, 37661 [Source:MGI Symbol;Acc:MGI:5610889]
Gm19863	318.708	0.669125	0.188038	3.55847	0.000373026	0.075625	245.826	391.59	1.59296	Not Sig	ENSMUSG00000102650	TEC	nonsignificant	predicted gene, 19863 [Source:MGI Symbol;Acc:MGI:5012048]
Wfs1	5826.96	-0.386527	0.108625	-3.55835	0.000373186	0.075625	6602.41	5051.5	0.7651	Not Sig	ENSMUSG00000039474	protein_coding	nonsignificant	wolframin ER transmembrane glycoprotein [Source:MGI Symbol;Acc:MGI:1328355]
Gm48239	961.952	0.481218	0.135279	3.55723	0.000374783	0.075625	802.457	1121.45	1.39752	Not Sig	ENSMUSG00000114230	lncRNA	nonsignificant	predicted gene, 48239 [Source:MGI Symbol;Acc:MGI:6097649]
Spef2	465.84	0.632332	0.177599	3.56044	0.000370231	0.075625	365.333	566.347	1.55022	Not Sig	ENSMUSG00000072663	protein_coding	nonsignificant	sperm flagellar 2 [Source:MGI Symbol;Acc:MGI:2443727]
Gm48870	748.55	0.644085	0.18118	3.55494	0.000378069	0.075897	583.883	913.218	1.56404	Not Sig	ENSMUSG00000113065	TEC	nonsignificant	predicted gene, 48870 [Source:MGI Symbol;Acc:MGI:6098616]
C130089K02Rik	230.425	0.752731	0.212914	3.53538	0.000407192	0.0811404	171.751	289.1	1.68325	Not Sig	ENSMUSG00000104339	TEC	nonsignificant	RIKEN cDNA C130089K02 gene [Source:MGI Symbol;Acc:MGI:2444420]
Vsnl1	20626.5	-0.292866	0.082856	-3.53464	0.000408334	0.0811404	22712.4	18540.6	0.816322	Not Sig	ENSMUSG00000054459	protein_coding	nonsignificant	visinin-like 1 [Source:MGI Symbol;Acc:MGI:1349453]
Gm13311	105.625	1.08846	0.308058	3.53329	0.000410424	0.0811437	67.3609	143.889	2.13609	Not Sig	ENSMUSG00000082542	processed_pseudogene	nonsignificant	predicted gene 13311 [Source:MGI Symbol;Acc:MGI:3651093]
Rspo2	1284.41	-0.360799	0.102219	-3.52966	0.000416097	0.0818519	1445.41	1123.41	0.777226	Not Sig	ENSMUSG00000051920	protein_coding	nonsignificant	R-spondin 2 [Source:MGI Symbol;Acc:MGI:1922667]
5530401A14Rik	259.602	0.759202	0.215212	3.52769	0.000419205	0.082051	192.739	326.465	1.69382	Not Sig	ENSMUSG00000020703	lncRNA	nonsignificant	RIKEN cDNA 5530401A14 gene [Source:MGI Symbol;Acc:MGI:1918638]
Rgs17	6658.33	-0.243765	0.0693052	-3.51727	0.000436006	0.0846739	7219.34	6097.32	0.844582	Not Sig	ENSMUSG00000019775	protein_coding	nonsignificant	regulator of G-protein signaling 17 [Source:MGI Symbol;Acc:MGI:1927469]
Prr32	87.2984	2.9614	0.842095	3.51671	0.000436931	0.0846739	19.8963	154.7	7.77534	Not Sig	ENSMUSG00000037086	protein_coding	nonsignificant	proline rich 32 [Source:MGI Symbol;Acc:MGI:1916050]
Speer4a3	164.375	0.811566	0.231056	3.51242	0.000444053	0.0856299	119.62	209.13	1.74829	Not Sig	ENSMUSG00000095550	protein_coding	nonsignificant	spermatogenesis associated glutamate (E)-rich protein 4A3 [Source:MGI Symbol;Acc:MGI:5435026]
Reln	9031.03	-0.29312	0.0835606	-3.50788	0.000451699	0.0862547	9943.77	8118.28	0.816418	Not Sig	ENSMUSG00000042453	protein_coding	nonsignificant	reelin [Source:MGI Symbol;Acc:MGI:103022]
Gm48758	68.9177	1.34789	0.384237	3.50797	0.000451546	0.0862547	38.7686	99.0667	2.55533	Not Sig	ENSMUSG00000112162	processed_pseudogene	nonsignificant	predicted gene, 48758 [Source:MGI Symbol;Acc:MGI:6098439]
Gm44541	419.489	0.77142	0.220349	3.5009	0.000463686	0.0876882	309.547	529.431	1.71034	Not Sig	ENSMUSG00000109286	TEC	nonsignificant	predicted gene 44541 [Source:MGI Symbol;Acc:MGI:5753117]
Zmat4	4107.07	-0.252487	0.0721085	-3.50149	0.000462663	0.0876882	4465.7	3748.44	0.839385	Not Sig	ENSMUSG00000037492	protein_coding	nonsignificant	zinc finger, matrin type 4 [Source:MGI Symbol;Acc:MGI:2443497]
Gm48314	325.147	0.565215	0.161786	3.49359	0.000476577	0.0896928	262.13	388.163	1.4808	Not Sig	ENSMUSG00000111017	TEC	nonsignificant	predicted gene, 48314 [Source:MGI Symbol;Acc:MGI:6097766]
9130024F11Rik	363.303	-0.677192	0.194016	-3.4904	0.000482305	0.0899394	446.452	280.154	0.627512	Not Sig	ENSMUSG00000087022	lncRNA	nonsignificant	RIKEN cDNA 9130024F11 gene [Source:MGI Symbol;Acc:MGI:1926150]
Gm48643	15.0741	3.25636	0.9332	3.48946	0.000483997	0.0899394	2.81673	27.3315	9.70329	Not Sig	ENSMUSG00000113411	processed_pseudogene	nonsignificant	predicted gene, 48643 [Source:MGI Symbol;Acc:MGI:6098250]
Gm48700	429.605	0.784882	0.224957	3.48903	0.000484781	0.0899394	315.103	544.108	1.72676	Not Sig	ENSMUSG00000113055	TEC	nonsignificant	predicted gene, 48700 [Source:MGI Symbol;Acc:MGI:6098336]
Serpini1	14364.5	-0.221836	0.0636552	-3.48496	0.000492214	0.0908877	15467.1	13261.9	0.857428	Not Sig	ENSMUSG00000027834	protein_coding	nonsignificant	serine (or cysteine) peptidase inhibitor, clade I, member 1 [Source:MGI Symbol;Acc:MGI:1194506]
Ipcef1	2512.76	-0.286323	0.0823897	-3.47522	0.000510429	0.0938088	2762.69	2262.83	0.819068	Not Sig	ENSMUSG00000064065	protein_coding	nonsignificant	interaction protein for cytohesin exchange factors 1 [Source:MGI Symbol;Acc:MGI:2444159]
Zfp979	84.0096	1.18515	0.341619	3.46923	0.000521961	0.0954799	51.2111	116.808	2.28091	Not Sig	ENSMUSG00000066000	protein_coding	nonsignificant	zinc finger protein 979 [Source:MGI Symbol;Acc:MGI:2148252]
Elavl4	5762.38	-0.245081	0.0707603	-3.46353	0.00053313	0.0970694	6250.47	5274.28	0.843822	Not Sig	ENSMUSG00000028546	protein_coding	nonsignificant	ELAV like RNA binding protein 4 [Source:MGI Symbol;Acc:MGI:107427]
Gm38380	233.553	0.690622	0.199733	3.45772	0.000544763	0.0987037	178.314	288.792	1.61958	Not Sig	ENSMUSG00000102664	TEC	nonsignificant	predicted gene, 38380 [Source:MGI Symbol;Acc:MGI:5611608]
Gm48739	24.7527	1.84596	0.534047	3.45654	0.000547149	0.0987037	10.6893	38.8161	3.63132	Not Sig	ENSMUSG00000110885	transcribed_processed_pseudogene	nonsignificant	predicted gene, 48739 [Source:MGI Symbol;Acc:MGI:6098405]
Adgrv1	613.194	0.57273	0.16615	3.44706	0.000566717	0.101765	492.403	733.985	1.49062	Not Sig	ENSMUSG00000069170	protein_coding	nonsignificant	adhesion G protein-coupled receptor V1 [Source:MGI Symbol;Acc:MGI:1274784]
Gm44026	433.096	0.538709	0.156888	3.43371	0.000595383	0.106424	352.359	513.833	1.45826	Not Sig	ENSMUSG00000108081	lncRNA	nonsignificant	predicted gene, 44026 [Source:MGI Symbol;Acc:MGI:5690418]
Gm44423	201.821	0.645027	0.187988	3.43122	0.000600868	0.106916	157.254	246.387	1.56681	Not Sig	ENSMUSG00000108064	TEC	nonsignificant	predicted gene, 44423 [Source:MGI Symbol;Acc:MGI:5690815]
Stmn1	7322.42	-0.28358	0.0827189	-3.42824	0.00060751	0.107426	8041.8	6603.04	0.82109	Not Sig	ENSMUSG00000028832	protein_coding	nonsignificant	stathmin 1 [Source:MGI Symbol;Acc:MGI:96739]
Rdh5	143.095	1.13052	0.329958	3.42626	0.000611963	0.107426	89.5833	196.606	2.19467	Not Sig	ENSMUSG00000025350	protein_coding	nonsignificant	retinol dehydrogenase 5 [Source:MGI Symbol;Acc:MGI:1201412]
3110053B16Rik	107.083	-0.883581	0.257858	-3.42662	0.000611138	0.107426	138.494	75.6721	0.546391	Not Sig	ENSMUSG00000085642	transcribed_unprocessed_pseudogene	nonsignificant	RIKEN cDNA 3110053B16 gene [Source:MGI Symbol;Acc:MGI:1920435]
Dclk3	799.094	-0.399601	0.116683	-3.42466	0.000615579	0.107578	909.932	688.257	0.756383	Not Sig	ENSMUSG00000032500	protein_coding	nonsignificant	doublecortin-like kinase 3 [Source:MGI Symbol;Acc:MGI:3039580]
Gm47910	407.023	0.557628	0.16292	3.42272	0.000619985	0.107866	328.829	485.217	1.47559	Not Sig	ENSMUSG00000112248	TEC	nonsignificant	predicted gene, 47910 [Source:MGI Symbol;Acc:MGI:6097155]
Otx2	209.72	2.40755	0.703971	3.41995	0.000626322	0.108487	66.572	352.867	5.30054	Not Sig	ENSMUSG00000021848	protein_coding	nonsignificant	orthodenticle homeobox 2 [Source:MGI Symbol;Acc:MGI:97451]
Efr3a	14407.1	-0.24244	0.0709164	-3.41867	0.000629272	0.108518	15616.5	13197.8	0.845121	Not Sig	ENSMUSG00000015002	protein_coding	nonsignificant	EFR3 homolog A [Source:MGI Symbol;Acc:MGI:1923990]
Rasgef1b	1114.55	-0.326544	0.0957054	-3.41197	0.000644959	0.110734	1239.65	989.455	0.798172	Not Sig	ENSMUSG00000089809	protein_coding	nonsignificant	RasGEF domain family, member 1B [Source:MGI Symbol;Acc:MGI:2443755]
Plxna4os2	492.595	0.715927	0.209902	3.41078	0.000647783	0.110734	372.556	612.634	1.64441	Not Sig	ENSMUSG00000086675	lncRNA	nonsignificant	plexin A4, opposite strand 2 [Source:MGI Symbol;Acc:MGI:3045237]
Gm47700	173.76	0.907621	0.266901	3.40058	0.00067242	0.114446	120.291	227.228	1.88898	Not Sig	ENSMUSG00000112075	TEC	nonsignificant	predicted gene, 47700 [Source:MGI Symbol;Acc:MGI:6096813]
Rd3	28.1214	1.97316	0.580456	3.39933	0.000675505	0.114473	11.4233	44.8195	3.92351	Not Sig	ENSMUSG00000049353	protein_coding	nonsignificant	retinal degeneration 3 [Source:MGI Symbol;Acc:MGI:1921273]
Gm43421	322.758	0.632816	0.186558	3.39205	0.000693714	0.117052	252.696	392.819	1.55451	Not Sig	ENSMUSG00000104706	TEC	nonsignificant	predicted gene 43421 [Source:MGI Symbol;Acc:MGI:5663558]
Gm49154	10.8839	4.59378	1.35599	3.38777	0.000704646	0.118387	0.837369	20.9304	24.9954	Not Sig	ENSMUSG00000115599	TEC	nonsignificant	predicted gene, 49154 [Source:MGI Symbol;Acc:MGI:6118573]
4930470B04Rik	206.836	0.857153	0.253322	3.38365	0.000715292	0.119662	146.943	266.73	1.81519	Not Sig	ENSMUSG00000104365	TEC	nonsignificant	RIKEN cDNA 4930470B04 gene [Source:MGI Symbol;Acc:MGI:1923057]
Gm49159	42.3483	1.37202	0.40568	3.38203	0.00071953	0.119858	23.5772	61.1193	2.59231	Not Sig	ENSMUSG00000115306	TEC	nonsignificant	predicted gene, 49159 [Source:MGI Symbol;Acc:MGI:6118580]
Angptl2	624.677	0.479367	0.141863	3.37907	0.000727304	0.120205	522.414	726.94	1.3915	Not Sig	ENSMUSG00000004105	protein_coding	nonsignificant	angiopoietin-like 2 [Source:MGI Symbol;Acc:MGI:1347002]
Gm48381	258.384	0.631912	0.187032	3.37864	0.00072846	0.120205	202.512	314.255	1.55178	Not Sig	ENSMUSG00000113864	TEC	nonsignificant	predicted gene, 48381 [Source:MGI Symbol;Acc:MGI:6097859]
Or6c220-ps1	173.634	0.955669	0.282931	3.37775	0.000730826	0.120205	117.89	229.379	1.94571	Not Sig	ENSMUSG00000108568	unprocessed_pseudogene	nonsignificant	olfactory receptor family 6 subfamily C member 220, pseudogene 1 [Source:MGI Symbol;Acc:MGI:3030111]
Atp2b4	10124.6	-0.389596	0.115424	-3.37535	0.000737208	0.120245	11484.5	8764.73	0.763179	Not Sig	ENSMUSG00000026463	protein_coding	nonsignificant	ATPase, Ca++ transporting, plasma membrane 4 [Source:MGI Symbol;Acc:MGI:88111]
Gmnc	313.702	0.716445	0.212217	3.376	0.000735472	0.120245	237.001	390.402	1.64726	Not Sig	ENSMUSG00000068428	protein_coding	nonsignificant	geminin coiled-coil domain containing [Source:MGI Symbol;Acc:MGI:2685452]
Fgf12	8522.43	-0.234514	0.0696856	-3.36531	0.000764566	0.12419	9213.3	7831.56	0.850028	Not Sig	ENSMUSG00000022523	protein_coding	nonsignificant	fibroblast growth factor 12 [Source:MGI Symbol;Acc:MGI:109183]
Col4a4	173.523	1.07152	0.318637	3.36282	0.000771508	0.124799	111.766	235.28	2.10512	Not Sig	ENSMUSG00000067158	protein_coding	nonsignificant	collagen, type IV, alpha 4 [Source:MGI Symbol;Acc:MGI:104687]
Gm18325	184.623	0.758006	0.225609	3.35982	0.000779932	0.125128	136.969	232.278	1.69584	Not Sig	ENSMUSG00000107489	processed_pseudogene	nonsignificant	predicted gene, 18325 [Source:MGI Symbol;Acc:MGI:5010510]
Drd1	408.306	-0.493363	0.146809	-3.36059	0.000777763	0.125128	476.766	339.845	0.712814	Not Sig	ENSMUSG00000021478	protein_coding	nonsignificant	dopamine receptor D1 [Source:MGI Symbol;Acc:MGI:99578]
Grm4	742.335	-0.43377	0.129241	-3.35628	0.000789998	0.126226	853.466	631.204	0.739578	Not Sig	ENSMUSG00000063239	protein_coding	nonsignificant	glutamate receptor, metabotropic 4 [Source:MGI Symbol;Acc:MGI:1351341]
Gm15240	101.641	1.07322	0.320002	3.35378	0.000797144	0.12685	65.3892	137.892	2.10879	Not Sig	ENSMUSG00000082915	processed_pseudogene	nonsignificant	predicted gene 15240 [Source:MGI Symbol;Acc:MGI:3705404]
Gm47022	515.039	0.627289	0.187113	3.35247	0.000800945	0.126938	404.001	626.078	1.54969	Not Sig	ENSMUSG00000112142	TEC	nonsignificant	predicted gene, 47022 [Source:MGI Symbol;Acc:MGI:6095709]
Gm10538	224.04	0.610261	0.182554	3.3429	0.000829088	0.129724	177.272	270.808	1.52764	Not Sig	ENSMUSG00000101126	lncRNA	nonsignificant	predicted gene 10538 [Source:MGI Symbol;Acc:MGI:3642693]
Mgst3	1089.55	-0.377902	0.113021	-3.34365	0.000826836	0.129724	1231.3	947.798	0.769755	Not Sig	ENSMUSG00000026688	protein_coding	nonsignificant	microsomal glutathione S-transferase 3 [Source:MGI Symbol;Acc:MGI:1913697]
Pak6	2913.29	-0.258921	0.0774084	-3.34486	0.000823231	0.129724	3175.07	2651.5	0.835099	Not Sig	ENSMUSG00000074923	protein_coding	nonsignificant	p21 (RAC1) activated kinase 6 [Source:MGI Symbol;Acc:MGI:2679420]
Lbp	402.663	1.89991	0.568577	3.34151	0.000833228	0.129724	170.213	635.113	3.73129	Not Sig	ENSMUSG00000016024	protein_coding	nonsignificant	lipopolysaccharide binding protein [Source:MGI Symbol;Acc:MGI:1098776]
Nup50l	276.284	0.71285	0.213371	3.3409	0.000835088	0.129724	209.112	343.456	1.64245	Not Sig	ENSMUSG00000072878	protein_coding	nonsignificant	nucleoporin 50 like [Source:MGI Symbol;Acc:MGI:1925732]
4930599N24Rik	223.403	0.864318	0.259191	3.33468	0.000853974	0.131613	158.402	288.403	1.8207	Not Sig	ENSMUSG00000105545	TEC	nonsignificant	RIKEN cDNA 4930599N24 gene [Source:MGI Symbol;Acc:MGI:1922633]
Gm47338	263.964	0.741324	0.222237	3.33574	0.00085073	0.131613	197.272	330.656	1.67614	Not Sig	ENSMUSG00000112548	TEC	nonsignificant	predicted gene, 47338 [Source:MGI Symbol;Acc:MGI:6096229]
Ptprjos1	336.818	0.695057	0.209008	3.32551	0.000882584	0.134629	256.988	416.648	1.62128	Not Sig	ENSMUSG00000085471	lncRNA	nonsignificant	protein tyrosine phosphatase receptor type J, opposite strand 1 [Source:MGI Symbol;Acc:MGI:1918408]
Mir124-2hg	2594.37	-0.264607	0.0795451	-3.3265	0.000879439	0.134629	2831.09	2357.64	0.832768	Not Sig	ENSMUSG00000100252	lncRNA	nonsignificant	Mir124-2 host gene (non-protein coding) [Source:MGI Symbol;Acc:MGI:1917691]
Gm28750	189.107	0.759893	0.228532	3.3251	0.00088386	0.134629	139.937	238.277	1.70274	Not Sig	ENSMUSG00000101463	lncRNA	nonsignificant	predicted gene 28750 [Source:MGI Symbol;Acc:MGI:5579456]
Sostdc1	558.613	2.62437	0.790959	3.31796	0.000906785	0.137585	155.945	961.282	6.16425	Not Sig	ENSMUSG00000036169	protein_coding	nonsignificant	sclerostin domain containing 1 [Source:MGI Symbol;Acc:MGI:1913292]
Klhdc8a	301.889	-0.598092	0.180334	-3.31658	0.000911269	0.137732	362.719	241.059	0.664588	Not Sig	ENSMUSG00000042115	protein_coding	nonsignificant	kelch domain containing 8A [Source:MGI Symbol;Acc:MGI:2442630]
Gm37159	264.933	0.661833	0.199713	3.31393	0.000919955	0.138083	205.415	324.452	1.5795	Not Sig	ENSMUSG00000103233	TEC	nonsignificant	predicted gene, 37159 [Source:MGI Symbol;Acc:MGI:5610387]
4930532I03Rik	261.708	0.780427	0.23559	3.31265	0.000924172	0.138083	192.029	331.388	1.72572	Not Sig	ENSMUSG00000112201	lncRNA	nonsignificant	RIKEN cDNA 4930532I03 gene [Source:MGI Symbol;Acc:MGI:1923083]
Slc8a3	1371.81	-0.378884	0.114343	-3.31357	0.000921128	0.138083	1549.64	1193.98	0.770488	Not Sig	ENSMUSG00000079055	protein_coding	nonsignificant	solute carrier family 8 (sodium/calcium exchanger), member 3 [Source:MGI Symbol;Acc:MGI:107976]
Gm43873	211.32	0.817068	0.246795	3.31071	0.000930586	0.138252	152.652	269.989	1.76866	Not Sig	ENSMUSG00000107606	TEC	nonsignificant	predicted gene, 43873 [Source:MGI Symbol;Acc:MGI:5690265]
C030005K15Rik	34.6103	1.57983	0.477265	3.31018	0.000932371	0.138252	17.2372	51.9834	3.01576	Not Sig	ENSMUSG00000079183	lncRNA	nonsignificant	RIKEN cDNA C030005K15 gene [Source:MGI Symbol;Acc:MGI:3641867]
Gm32432	160.581	0.988702	0.298806	3.30885	0.000936811	0.138386	107.193	213.97	1.99611	Not Sig	ENSMUSG00000117324	lncRNA	nonsignificant	predicted gene, 32432 [Source:MGI Symbol;Acc:MGI:5591591]
Gm15169	12.2243	-3.02832	0.915719	-3.30704	0.000942864	0.138757	21.9898	2.45885	0.111818	Not Sig	ENSMUSG00000086188	lncRNA	nonsignificant	predicted gene 15169 [Source:MGI Symbol;Acc:MGI:3705215]
Ccdc170	81.2679	1.05426	0.319066	3.30421	0.000952435	0.139641	52.8085	109.727	2.07784	Not Sig	ENSMUSG00000019767	protein_coding	nonsignificant	coiled-coil domain containing 170 [Source:MGI Symbol;Acc:MGI:2685067]
Gm47027	156.222	0.985841	0.298686	3.3006	0.0009648	0.140598	104.676	207.769	1.98487	Not Sig	ENSMUSG00000112555	lncRNA	nonsignificant	predicted gene, 47027 [Source:MGI Symbol;Acc:MGI:6095719]
Mir3552	16.5498	2.47822	0.750928	3.3002	0.000966146	0.140598	5.01512	28.0845	5.59995	Not Sig	ENSMUSG00000092879	miRNA	nonsignificant	microRNA 3552 [Source:MGI Symbol;Acc:MGI:5452427]
Gm49156	6.44856	5.30354	1.60794	3.29833	0.000972607	0.141014	0.325829	12.5713	38.5825	Not Sig	ENSMUSG00000115579	lncRNA	nonsignificant	predicted gene, 49156 [Source:MGI Symbol;Acc:MGI:6118576]
Gm45393	281.846	0.656843	0.199279	3.2961	0.000980367	0.141614	218.485	345.207	1.58	Not Sig	ENSMUSG00000109616	TEC	nonsignificant	predicted gene 45393 [Source:MGI Symbol;Acc:MGI:5791229]
Cacng3	2301.27	-0.329956	0.100173	-3.29388	0.000988146	0.142213	2562.93	2039.61	0.795811	Not Sig	ENSMUSG00000066189	protein_coding	nonsignificant	calcium channel, voltage-dependent, gamma subunit 3 [Source:MGI Symbol;Acc:MGI:1859165]
Rab6b	48259.7	-0.217058	0.0659189	-3.29281	0.000991925	0.142234	51883.2	44636.2	0.86032	Not Sig	ENSMUSG00000032549	protein_coding	nonsignificant	RAB6B, member RAS oncogene family [Source:MGI Symbol;Acc:MGI:107283]
Lamp5	1307.35	-0.392903	0.119436	-3.28966	0.00100309	0.142272	1484.63	1130.07	0.76118	Not Sig	ENSMUSG00000027270	protein_coding	nonsignificant	lysosomal-associated membrane protein family, member 5 [Source:MGI Symbol;Acc:MGI:1923411]
Sptlc3	20.6961	2.72016	0.826427	3.29147	0.000996643	0.142272	5.48107	35.9111	6.55185	Not Sig	ENSMUSG00000039092	protein_coding	nonsignificant	serine palmitoyltransferase, long chain base subunit 3 [Source:MGI Symbol;Acc:MGI:2444678]
Clstn1	42846.1	-0.2302	0.069967	-3.29013	0.00100142	0.142272	46259	39433.2	0.852443	Not Sig	ENSMUSG00000039953	protein_coding	nonsignificant	calsyntenin 1 [Source:MGI Symbol;Acc:MGI:1929895]
Xlr3a	80.2978	1.19218	0.362688	3.28708	0.00101234	0.143065	48.8237	111.772	2.2893	Not Sig	ENSMUSG00000057836	protein_coding	nonsignificant	X-linked lymphocyte-regulated 3A [Source:MGI Symbol;Acc:MGI:109506]
Gm47337	646.339	0.60583	0.184552	3.2827	0.00102818	0.144661	511.973	780.705	1.52489	Not Sig	ENSMUSG00000112197	TEC	nonsignificant	predicted gene, 47337 [Source:MGI Symbol;Acc:MGI:6096227]
Gm30042	419.662	0.522369	0.159166	3.28192	0.00103103	0.144661	343.705	495.62	1.44199	Not Sig	ENSMUSG00000118330	lncRNA	nonsignificant	predicted gene, 30042 [Source:MGI Symbol;Acc:MGI:5589201]
Gm48889	426.993	0.731509	0.223085	3.27906	0.00104155	0.145616	320.783	533.204	1.6622	Not Sig	ENSMUSG00000112955	TEC	nonsignificant	predicted gene, 48889 [Source:MGI Symbol;Acc:MGI:6098650]
Zfp976	595.265	0.501904	0.153279	3.27445	0.00105867	0.14696	491.74	698.79	1.42105	Not Sig	ENSMUSG00000074158	protein_coding	nonsignificant	zinc finger protein 976 [Source:MGI Symbol;Acc:MGI:3036263]
Gm49411	213.309	0.697638	0.213022	3.27497	0.00105675	0.14696	162.62	263.997	1.6234	Not Sig	ENSMUSG00000116185	TEC	nonsignificant	predicted gene, 49411 [Source:MGI Symbol;Acc:MGI:6155037]
Cdkn1c	197.274	0.82382	0.251687	3.2732	0.00106338	0.147092	142.264	252.285	1.77336	Not Sig	ENSMUSG00000037664	protein_coding	nonsignificant	cyclin dependent kinase inhibitor 1C [Source:MGI Symbol;Acc:MGI:104564]
Klhl4	727.578	-0.45111	0.137884	-3.27167	0.00106914	0.147368	840.724	614.432	0.730837	Not Sig	ENSMUSG00000025597	protein_coding	nonsignificant	kelch-like 4 [Source:MGI Symbol;Acc:MGI:2442829]
Ankrd34c	267.328	-0.659037	0.201605	-3.26894	0.0010795	0.148274	326.839	207.817	0.635839	Not Sig	ENSMUSG00000047606	protein_coding	nonsignificant	ankyrin repeat domain 34C [Source:MGI Symbol;Acc:MGI:2685617]
Rangap1	7747.46	-0.21992	0.0672985	-3.26784	0.00108373	0.148335	8336.79	7158.12	0.858619	Not Sig	ENSMUSG00000022391	protein_coding	nonsignificant	RAN GTPase activating protein 1 [Source:MGI Symbol;Acc:MGI:103071]
Rpl7a-ps5	27.29	1.70641	0.5228	3.26399	0.00109854	0.149837	12.8803	41.6996	3.23747	Not Sig	ENSMUSG00000071052	processed_pseudogene	nonsignificant	ribosomal protein L7A, pseudogene 5 [Source:MGI Symbol;Acc:MGI:3643553]
Gm47088	303.49	0.600519	0.184417	3.25631	0.00112871	0.153418	240.914	366.066	1.51949	Not Sig	ENSMUSG00000113076	TEC	nonsignificant	predicted gene, 47088 [Source:MGI Symbol;Acc:MGI:6095816]
Gm43426	115.825	0.917028	0.281817	3.25399	0.00113797	0.154142	80.2621	151.387	1.88616	Not Sig	ENSMUSG00000106214	TEC	nonsignificant	predicted gene 43426 [Source:MGI Symbol;Acc:MGI:5663563]
Sncb	10689.4	-0.234891	0.0722283	-3.25207	0.00114569	0.154653	11558.4	9820.43	0.849633	Not Sig	ENSMUSG00000034891	protein_coding	nonsignificant	synuclein, beta [Source:MGI Symbol;Acc:MGI:1889011]
Dnm3os	411.322	0.732452	0.22537	3.24999	0.00115408	0.154718	309.169	513.475	1.66082	Not Sig	ENSMUSG00000078190	lncRNA	nonsignificant	dynamin 3, opposite strand [Source:MGI Symbol;Acc:MGI:3052332]
Six3os1	39.2168	1.94369	0.597949	3.2506	0.00115162	0.154718	16.1244	62.3091	3.86427	Not Sig	ENSMUSG00000093460	lncRNA	nonsignificant	SIX homeobox 3, opposite strand 1 [Source:MGI Symbol;Acc:MGI:1925118]
Gm7745	7.65227	-4.43277	1.36628	-3.24442	0.00117692	0.157241	14.7575	0.547043	0.0370689	Not Sig	ENSMUSG00000098029	transcribed_processed_pseudogene	nonsignificant	predicted gene 7745 [Source:MGI Symbol;Acc:MGI:3779759]
6720469O03Rik	12.0894	2.5371	0.782484	3.24236	0.00118543	0.157326	3.5779	20.601	5.75783	Not Sig	ENSMUSG00000108507	TEC	nonsignificant	RIKEN cDNA 6720469O03 gene [Source:MGI Symbol;Acc:MGI:1924988]
2610507I01Rik	137.986	0.977088	0.301354	3.24232	0.00118559	0.157326	93.2326	182.739	1.96003	Not Sig	ENSMUSG00000085882	lncRNA	nonsignificant	RIKEN cDNA 2610507I01 gene [Source:MGI Symbol;Acc:MGI:1919453]
Stxbp1	32325.2	-0.22149	0.0683569	-3.24019	0.00119448	0.157371	34803.2	29847.1	0.857596	Not Sig	ENSMUSG00000026797	protein_coding	nonsignificant	syntaxin binding protein 1 [Source:MGI Symbol;Acc:MGI:107363]
Kcnc4	2771.23	-0.307485	0.0950609	-3.23461	0.00121809	0.157371	3066.69	2475.77	0.80731	Not Sig	ENSMUSG00000027895	protein_coding	nonsignificant	potassium voltage gated channel, Shaw-related subfamily, member 4 [Source:MGI Symbol;Acc:MGI:96670]
Prkar1b	18060.2	-0.24491	0.0756555	-3.23717	0.00120722	0.157371	19591.6	16528.8	0.843665	Not Sig	ENSMUSG00000025855	protein_coding	nonsignificant	protein kinase, cAMP dependent regulatory, type I beta [Source:MGI Symbol;Acc:MGI:97759]
Gm45262	297.185	0.639682	0.197492	3.23903	0.00119936	0.157371	231.765	362.605	1.56454	Not Sig	ENSMUSG00000109942	TEC	nonsignificant	predicted gene 45262 [Source:MGI Symbol;Acc:MGI:5791098]
Gm47801	542.275	0.582442	0.180031	3.23524	0.00121542	0.157371	433.676	650.874	1.50083	Not Sig	ENSMUSG00000112036	TEC	nonsignificant	predicted gene, 47801 [Source:MGI Symbol;Acc:MGI:6096979]
Nxph4	52.2002	-1.22506	0.378704	-3.23488	0.00121693	0.157371	73.229	31.1714	0.42567	Not Sig	ENSMUSG00000040258	protein_coding	nonsignificant	neurexophilin 4 [Source:MGI Symbol;Acc:MGI:1336197]
Sec14l3	103.505	-0.908084	0.28032	-3.23945	0.00119759	0.157371	134.446	72.5644	0.539731	Not Sig	ENSMUSG00000054986	protein_coding	nonsignificant	SEC14-like lipid binding 3 [Source:MGI Symbol;Acc:MGI:3617848]
Gm48262	77.5586	1.15727	0.357554	3.23663	0.0012095	0.157371	47.8061	107.311	2.24472	Not Sig	ENSMUSG00000113742	TEC	nonsignificant	predicted gene, 48262 [Source:MGI Symbol;Acc:MGI:6097681]
Prkg2	325.183	-0.514991	0.159702	-3.2247	0.00126105	0.161853	383.145	267.22	0.697439	Not Sig	ENSMUSG00000029334	protein_coding	nonsignificant	protein kinase, cGMP-dependent, type II [Source:MGI Symbol;Acc:MGI:108173]
Gm42440	274.129	0.793678	0.246095	3.22508	0.00125936	0.161853	200.668	347.589	1.73216	Not Sig	ENSMUSG00000105720	TEC	nonsignificant	predicted gene 42440 [Source:MGI Symbol;Acc:MGI:5662577]
Ttn	2971.26	0.33816	0.10518	3.21507	0.00130413	0.166291	2623.57	3318.94	1.26505	Not Sig	ENSMUSG00000051747	protein_coding	nonsignificant	titin [Source:MGI Symbol;Acc:MGI:98864]
Gm45290	517.252	0.46506	0.144642	3.21525	0.00130331	0.166291	434.288	600.215	1.38207	Not Sig	ENSMUSG00000109709	TEC	nonsignificant	predicted gene 45290 [Source:MGI Symbol;Acc:MGI:5791126]
Gm37862	649.332	0.535454	0.166651	3.21302	0.00131347	0.166398	529.535	769.129	1.45246	Not Sig	ENSMUSG00000102407	TEC	nonsignificant	predicted gene, 37862 [Source:MGI Symbol;Acc:MGI:5611090]
Gm43319	728.633	0.549381	0.170944	3.21381	0.00130988	0.166398	590.568	866.698	1.46757	Not Sig	ENSMUSG00000105958	TEC	nonsignificant	predicted gene 43319 [Source:MGI Symbol;Acc:MGI:5663456]
Gm9821	424.951	0.482705	0.150381	3.20988	0.0013279	0.167683	353.895	496.007	1.40156	Not Sig	ENSMUSG00000095332	lncRNA	nonsignificant	predicted gene 9821 [Source:MGI Symbol;Acc:MGI:3704208]
Gla	788.152	-0.349419	0.109056	-3.20405	0.00135511	0.170569	883.382	692.922	0.784396	Not Sig	ENSMUSG00000031266	protein_coding	nonsignificant	galactosidase, alpha [Source:MGI Symbol;Acc:MGI:1347344]
Gm19817	214.611	0.707996	0.221209	3.20057	0.00137157	0.170777	162.689	266.534	1.6383	Not Sig	ENSMUSG00000105302	TEC	nonsignificant	predicted gene, 19817 [Source:MGI Symbol;Acc:MGI:5012002]
Lzts1	4536.22	-0.243346	0.0760106	-3.20148	0.00136726	0.170777	4919	4153.44	0.844366	Not Sig	ENSMUSG00000036306	protein_coding	nonsignificant	leucine zipper, putative tumor suppressor 1 [Source:MGI Symbol;Acc:MGI:2684762]
Gm47341	245.171	0.706055	0.220641	3.20001	0.00137421	0.170777	186.355	303.987	1.63122	Not Sig	ENSMUSG00000112741	TEC	nonsignificant	predicted gene, 47341 [Source:MGI Symbol;Acc:MGI:6096234]
Grip1os1	120.416	0.923369	0.288525	3.20031	0.00137282	0.170777	83.101	157.731	1.89807	Not Sig	ENSMUSG00000085418	lncRNA	nonsignificant	glutamate receptor interacting protein 1, opposite strand 1 [Source:MGI Symbol;Acc:MGI:1922226]
Slco1c1	3950.06	0.265983	0.083145	3.19902	0.00137894	0.170823	3586.04	4314.08	1.20302	Not Sig	ENSMUSG00000030235	protein_coding	nonsignificant	solute carrier organic anion transporter family, member 1c1 [Source:MGI Symbol;Acc:MGI:1889679]
Hpcal1	1258.37	-0.367343	0.114998	-3.19435	0.00140146	0.173065	1419.54	1097.21	0.772929	Not Sig	ENSMUSG00000071379	protein_coding	nonsignificant	hippocalcin-like 1 [Source:MGI Symbol;Acc:MGI:1855689]
Atp11c	2269.53	0.393361	0.123261	3.19128	0.00141645	0.174366	1961.57	2577.49	1.31399	Not Sig	ENSMUSG00000062949	protein_coding	nonsignificant	ATPase, class VI, type 11C [Source:MGI Symbol;Acc:MGI:1859661]
Mpped1	8467.3	-0.234925	0.0736479	-3.18984	0.00142353	0.174688	9157.13	7777.46	0.849334	Not Sig	ENSMUSG00000041708	protein_coding	nonsignificant	metallophosphoesterase domain containing 1 [Source:MGI Symbol;Acc:MGI:106316]
Dnajc27	7677.7	-0.21639	0.067861	-3.18872	0.00142905	0.174818	8252.23	7103.16	0.860757	Not Sig	ENSMUSG00000020657	protein_coding	nonsignificant	DnaJ heat shock protein family (Hsp40) member C27 [Source:MGI Symbol;Acc:MGI:2443036]
Gm44897	96.6998	1.12219	0.352233	3.18593	0.00144289	0.175961	60.7729	132.627	2.18233	Not Sig	ENSMUSG00000108665	TEC	nonsignificant	predicted gene 44897 [Source:MGI Symbol;Acc:MGI:5753473]
Arl4c	2687.09	-0.260149	0.0817814	-3.18103	0.00146752	0.178267	2928.74	2445.44	0.834982	Not Sig	ENSMUSG00000049866	protein_coding	nonsignificant	ADP-ribosylation factor-like 4C [Source:MGI Symbol;Acc:MGI:2445172]
4930551E15Rik	92.7748	1.00089	0.314797	3.17947	0.00147546	0.178267	61.8502	123.699	1.99998	Not Sig	ENSMUSG00000085899	lncRNA	nonsignificant	RIKEN cDNA 4930551E15 gene [Source:MGI Symbol;Acc:MGI:1925453]
Gm37204	470.644	0.607651	0.191108	3.17963	0.00147465	0.178267	372.533	568.755	1.52672	Not Sig	ENSMUSG00000103657	TEC	nonsignificant	predicted gene, 37204 [Source:MGI Symbol;Acc:MGI:5610432]
Ngef	3635.63	-0.289569	0.0912323	-3.17398	0.00150365	0.180761	4001.28	3269.98	0.817235	Not Sig	ENSMUSG00000026259	protein_coding	nonsignificant	neuronal guanine nucleotide exchange factor [Source:MGI Symbol;Acc:MGI:1858414]
Gm44231	210.702	0.881581	0.277947	3.17175	0.00151521	0.180761	147.769	273.636	1.85178	Not Sig	ENSMUSG00000108173	TEC	nonsignificant	predicted gene, 44231 [Source:MGI Symbol;Acc:MGI:5690623]
Gm44894	83.8001	1.04158	0.328228	3.17336	0.00150688	0.180761	54.6392	112.961	2.0674	Not Sig	ENSMUSG00000108756	TEC	nonsignificant	predicted gene 44894 [Source:MGI Symbol;Acc:MGI:5753470]
4932413F04Rik	265.008	0.551238	0.17378	3.17204	0.00151371	0.180761	214.97	315.045	1.46553	Not Sig	ENSMUSG00000099616	lncRNA	nonsignificant	RIKEN cDNA 4932413F04 gene [Source:MGI Symbol;Acc:MGI:2441690]
Cspg4b	366.476	0.760125	0.239712	3.17099	0.00151919	0.180761	271.882	461.07	1.69585	Not Sig	ENSMUSG00000021763	protein_coding	nonsignificant	chondroitin sulfate proteoglycan 4B [Source:MGI Symbol;Acc:MGI:3040697]
Gm15916	194.885	0.834739	0.263583	3.16689	0.00154081	0.182777	140.13	249.641	1.7815	Not Sig	ENSMUSG00000083606	processed_pseudogene	nonsignificant	predicted gene 15916 [Source:MGI Symbol;Acc:MGI:3801989]
Gm37479	107.998	0.847765	0.268258	3.16026	0.00157631	0.184329	77.2873	138.708	1.79471	Not Sig	ENSMUSG00000102800	TEC	nonsignificant	predicted gene, 37479 [Source:MGI Symbol;Acc:MGI:5610707]
Ceacam2	170.842	0.654617	0.207123	3.16053	0.00157484	0.184329	132.533	209.152	1.57812	Not Sig	ENSMUSG00000054385	protein_coding	nonsignificant	CEA cell adhesion molecule 2 [Source:MGI Symbol;Acc:MGI:1347246]
Gm44895	166.63	1.00414	0.317762	3.16005	0.00157743	0.184329	110.435	222.825	2.01772	Not Sig	ENSMUSG00000108474	TEC	nonsignificant	predicted gene 44895 [Source:MGI Symbol;Acc:MGI:5753471]
Adamts1	1607.95	0.32557	0.10294	3.16272	0.00156305	0.184329	1427.27	1788.62	1.25318	Not Sig	ENSMUSG00000022893	protein_coding	nonsignificant	ADAM metallopeptidase with thrombospondin type 1 motif 1 [Source:MGI Symbol;Acc:MGI:109249]
4933407I08Rik	35.5114	1.3592	0.429934	3.16142	0.00157	0.184329	19.838	51.1847	2.58014	Not Sig	ENSMUSG00000084959	lncRNA	nonsignificant	RIKEN cDNA 4933407I08 gene [Source:MGI Symbol;Acc:MGI:1918259]
Slc22a23	3793.44	-0.252255	0.0799076	-3.15683	0.00159495	0.185821	4124.18	3462.7	0.83961	Not Sig	ENSMUSG00000038267	protein_coding	nonsignificant	solute carrier family 22, member 23 [Source:MGI Symbol;Acc:MGI:1920352]
5730408A14Rik	258.138	0.869622	0.275716	3.15406	0.00161018	0.187039	182.494	333.782	1.829	Not Sig	ENSMUSG00000104343	TEC	nonsignificant	RIKEN cDNA 5730408A14 gene [Source:MGI Symbol;Acc:MGI:1917766]
Nap1l5	14367.6	-0.207667	0.0659021	-3.15115	0.0016263	0.188353	15399.4	13335.7	0.865992	Not Sig	ENSMUSG00000055430	protein_coding	nonsignificant	nucleosome assembly protein 1-like 5 [Source:MGI Symbol;Acc:MGI:1923555]
Gm48762	17.4038	2.04638	0.649853	3.14898	0.00163839	0.189193	6.79938	28.0082	4.11924	Not Sig	ENSMUSG00000114000	lncRNA	nonsignificant	predicted gene, 48762 [Source:MGI Symbol;Acc:MGI:6098445]
Fat3	24661.9	-0.234489	0.0746506	-3.14116	0.00168281	0.193751	26661.4	22662.4	0.850007	Not Sig	ENSMUSG00000074505	protein_coding	nonsignificant	FAT atypical cadherin 3 [Source:MGI Symbol;Acc:MGI:2444314]
Steap4	20.8779	2.44396	0.779125	3.1368	0.00170804	0.196079	6.43114	35.3247	5.49276	Not Sig	ENSMUSG00000012428	protein_coding	nonsignificant	STEAP family member 4 [Source:MGI Symbol;Acc:MGI:1923560]
Gm43847	130.647	0.791155	0.252459	3.1338	0.00172559	0.196561	95.9456	165.347	1.72335	Not Sig	ENSMUSG00000105753	lncRNA	nonsignificant	predicted gene 43847 [Source:MGI Symbol;Acc:MGI:5663984]
Gm13835	119.267	0.908569	0.289977	3.13325	0.00172883	0.196561	82.8834	155.65	1.87794	Not Sig	ENSMUSG00000086922	processed_pseudogene	nonsignificant	predicted gene 13835 [Source:MGI Symbol;Acc:MGI:3650921]
Gm47590	1020.16	0.520563	0.166173	3.13266	0.00173232	0.196561	838.397	1201.93	1.43361	Not Sig	ENSMUSG00000112601	TEC	nonsignificant	predicted gene, 47590 [Source:MGI Symbol;Acc:MGI:6096634]
Tcf20	25300.2	-0.224435	0.0716431	-3.13269	0.00173214	0.196561	27265.1	23335.3	0.855866	Not Sig	ENSMUSG00000041852	protein_coding	nonsignificant	transcription factor 20 [Source:MGI Symbol;Acc:MGI:108399]
Cdkl4	1140.62	-0.317478	0.10152	-3.12726	0.00176443	0.199626	1265.5	1015.75	0.802649	Not Sig	ENSMUSG00000033966	protein_coding	nonsignificant	cyclin dependent kinase like 4 [Source:MGI Symbol;Acc:MGI:3587025]
Gm44241	587.134	0.598049	0.191329	3.12577	0.00177341	0.200063	466.248	708.019	1.51855	Not Sig	ENSMUSG00000107840	TEC	nonsignificant	predicted gene, 44241 [Source:MGI Symbol;Acc:MGI:5690633]
Gm13189	90.2307	1.0662	0.341268	3.12423	0.00178273	0.200537	58.2125	122.249	2.10005	Not Sig	ENSMUSG00000086921	lncRNA	nonsignificant	predicted gene 13189 [Source:MGI Symbol;Acc:MGI:3650860]
Ecrg4	267.326	2.37219	0.759985	3.12136	0.00180015	0.201335	86.6132	448.039	5.17287	Not Sig	ENSMUSG00000026051	protein_coding	nonsignificant	ECRG4 augurin precursor [Source:MGI Symbol;Acc:MGI:1926146]
Gm10115	544.198	0.567202	0.181765	3.12053	0.00180525	0.201335	437.943	650.452	1.48524	Not Sig	ENSMUSG00000062319	lncRNA	nonsignificant	predicted gene 10115 [Source:MGI Symbol;Acc:MGI:3641675]
Prr36	1876.09	-0.278959	0.0893523	-3.12201	0.00179623	0.201335	2056.54	1695.64	0.82451	Not Sig	ENSMUSG00000064125	protein_coding	nonsignificant	proline rich 36 [Source:MGI Symbol;Acc:MGI:3605626]
Gm47704	224.934	0.851264	0.272901	3.11932	0.00181272	0.201593	159.808	290.059	1.81505	Not Sig	ENSMUSG00000112866	TEC	nonsignificant	predicted gene, 47704 [Source:MGI Symbol;Acc:MGI:6096820]
Glul	71516.1	-0.192705	0.0617998	-3.11822	0.00181948	0.201772	76285.8	66746.4	0.874951	Not Sig	ENSMUSG00000026473	protein_coding	nonsignificant	glutamate-ammonia ligase [Source:MGI Symbol;Acc:MGI:95739]
Pcdh7	8451.93	-0.206316	0.0662032	-3.11641	0.0018307	0.201873	9054.58	7849.28	0.866885	Not Sig	ENSMUSG00000029108	protein_coding	nonsignificant	protocadherin 7 [Source:MGI Symbol;Acc:MGI:1860487]
Gm43864	660.99	0.489787	0.157125	3.11719	0.00182584	0.201873	549.037	772.944	1.40782	Not Sig	ENSMUSG00000108168	TEC	nonsignificant	predicted gene, 43864 [Source:MGI Symbol;Acc:MGI:5690256]
Col8a2	296.078	1.54955	0.498215	3.11021	0.00186955	0.205577	150.751	441.405	2.92803	Not Sig	ENSMUSG00000056174	protein_coding	nonsignificant	collagen, type VIII, alpha 2 [Source:MGI Symbol;Acc:MGI:88464]
Gm9916	549.836	0.538004	0.173314	3.10421	0.00190789	0.20804	447.867	651.804	1.45535	Not Sig	ENSMUSG00000104178	lncRNA	nonsignificant	predicted gene 9916 [Source:MGI Symbol;Acc:MGI:3642633]
Iqgap1	2820.23	0.309385	0.099665	3.10425	0.00190764	0.20804	2518.05	3122.41	1.24001	Not Sig	ENSMUSG00000030536	protein_coding	nonsignificant	IQ motif containing GTPase activating protein 1 [Source:MGI Symbol;Acc:MGI:1352757]
Xlr4b	49.1159	1.55289	0.500172	3.1047	0.00190471	0.20804	24.8531	73.3787	2.9525	Not Sig	ENSMUSG00000067768	protein_coding	nonsignificant	X-linked lymphocyte-regulated 4B [Source:MGI Symbol;Acc:MGI:1350975]
Gm4660	137.341	0.779873	0.251315	3.10317	0.00191457	0.208188	100.643	174.039	1.72927	Not Sig	ENSMUSG00000087636	processed_pseudogene	nonsignificant	predicted gene 4660 [Source:MGI Symbol;Acc:MGI:3782842]
Kcnj10	13191.4	-0.242751	0.0782798	-3.10106	0.00192828	0.208191	14297.3	12085.4	0.845295	Not Sig	ENSMUSG00000044708	protein_coding	nonsignificant	potassium inwardly-rectifying channel, subfamily J, member 10 [Source:MGI Symbol;Acc:MGI:1194504]
Gm38029	969.953	0.506363	0.163334	3.10017	0.00193409	0.208191	800.843	1139.06	1.42233	Not Sig	ENSMUSG00000103992	TEC	nonsignificant	predicted gene, 38029 [Source:MGI Symbol;Acc:MGI:5611257]
Tlcd4	4964.83	-0.23497	0.0757428	-3.1022	0.00192085	0.208191	5369.01	4560.66	0.849441	Not Sig	ENSMUSG00000028132	protein_coding	nonsignificant	TLC domain containing 4 [Source:MGI Symbol;Acc:MGI:1923195]
Rora	6046.77	-0.24936	0.0804414	-3.0999	0.00193586	0.208191	6567.81	5525.72	0.841334	Not Sig	ENSMUSG00000032238	protein_coding	nonsignificant	RAR-related orphan receptor alpha [Source:MGI Symbol;Acc:MGI:104661]
Gpr150	79.875	-0.906494	0.292582	-3.09825	0.00194665	0.208776	104.189	55.5611	0.533273	Not Sig	ENSMUSG00000045509	protein_coding	nonsignificant	G protein-coupled receptor 150 [Source:MGI Symbol;Acc:MGI:2441872]
Gm37645	226.376	0.708202	0.228775	3.09562	0.001964	0.210062	171.5	281.251	1.63995	Not Sig	ENSMUSG00000103192	TEC	nonsignificant	predicted gene, 37645 [Source:MGI Symbol;Acc:MGI:5610873]
Gm42971	330.995	0.699732	0.226317	3.09183	0.0019893	0.212188	251.799	410.191	1.62904	Not Sig	ENSMUSG00000105568	TEC	nonsignificant	predicted gene 42971 [Source:MGI Symbol;Acc:MGI:5663108]
Cntnap3	730.322	-0.468814	0.151896	-3.08641	0.00202586	0.215501	847.481	613.163	0.723512	Not Sig	ENSMUSG00000033063	protein_coding	nonsignificant	contactin associated protein-like 3 [Source:MGI Symbol;Acc:MGI:3588199]
Gpr87	110.905	0.949329	0.307724	3.085	0.0020355	0.215939	75.6541	146.156	1.9319	Not Sig	ENSMUSG00000051431	protein_coding	nonsignificant	G protein-coupled receptor 87 [Source:MGI Symbol;Acc:MGI:1934133]
Gm42439	137.012	0.962181	0.312568	3.07831	0.00208178	0.220253	92.9698	181.053	1.94744	Not Sig	ENSMUSG00000106395	lncRNA	nonsignificant	predicted gene 42439 [Source:MGI Symbol;Acc:MGI:5662576]
Gm10292	84.5933	1.09469	0.356119	3.07395	0.00211242	0.221912	53.7027	115.484	2.15043	Not Sig	ENSMUSG00000102846	processed_pseudogene	nonsignificant	predicted gene 10292 [Source:MGI Symbol;Acc:MGI:3642851]
Gm42996	234.658	0.832392	0.270733	3.07459	0.00210794	0.221912	168.698	300.618	1.78199	Not Sig	ENSMUSG00000106045	TEC	nonsignificant	predicted gene 42996 [Source:MGI Symbol;Acc:MGI:5663133]
Drc3	258.475	0.670536	0.218155	3.07366	0.00211448	0.221912	199.585	317.364	1.59012	Not Sig	ENSMUSG00000056598	protein_coding	nonsignificant	dynein regulatory complex subunit 3 [Source:MGI Symbol;Acc:MGI:1921915]
Gm42442	71.853	1.18553	0.385805	3.07286	0.00212015	0.221913	43.8842	99.8218	2.27467	Not Sig	ENSMUSG00000106557	TEC	nonsignificant	predicted gene 42442 [Source:MGI Symbol;Acc:MGI:5662579]
Adgrl4	959.722	0.417109	0.13589	3.06946	0.00214448	0.223861	821.198	1098.25	1.33737	Not Sig	ENSMUSG00000039167	protein_coding	nonsignificant	adhesion G protein-coupled receptor L4 [Source:MGI Symbol;Acc:MGI:2655562]
Gm37340	159.696	0.826164	0.269339	3.06738	0.00215944	0.224033	114.827	204.565	1.78151	Not Sig	ENSMUSG00000103412	TEC	nonsignificant	predicted gene, 37340 [Source:MGI Symbol;Acc:MGI:5610568]
Gm43359	625.574	0.360095	0.117415	3.06685	0.0021633	0.224033	547.908	703.239	1.2835	Not Sig	ENSMUSG00000105434	TEC	nonsignificant	predicted gene 43359 [Source:MGI Symbol;Acc:MGI:5663496]
Aldoc	22143.8	-0.208202	0.0678782	-3.06729	0.00216008	0.224033	23738.7	20548.9	0.865628	Not Sig	ENSMUSG00000017390	protein_coding	nonsignificant	aldolase C, fructose-bisphosphate [Source:MGI Symbol;Acc:MGI:101863]
Ccl9	40.8273	1.45981	0.476282	3.06502	0.00217655	0.224487	21.601	60.0535	2.78012	Not Sig	ENSMUSG00000019122	protein_coding	nonsignificant	C-C motif chemokine ligand 9 [Source:MGI Symbol;Acc:MGI:104533]
Epop	924.398	-0.367985	0.120074	-3.06466	0.00217915	0.224487	1042.57	806.221	0.773298	Not Sig	ENSMUSG00000043439	protein_coding	nonsignificant	elongin BC and polycomb repressive complex 2 associated protein [Source:MGI Symbol;Acc:MGI:2143991]
Gm44663	93.4051	0.889615	0.291277	3.05419	0.0022567	0.231865	65.65	121.16	1.84555	Not Sig	ENSMUSG00000108317	TEC	nonsignificant	predicted gene 44663 [Source:MGI Symbol;Acc:MGI:5753239]
Rims4	2921.62	-0.281899	0.0924363	-3.04966	0.002291	0.234161	3207.06	2636.17	0.821988	Not Sig	ENSMUSG00000035226	protein_coding	nonsignificant	regulating synaptic membrane exocytosis 4 [Source:MGI Symbol;Acc:MGI:2674366]
Col6a4	77.676	1.34544	0.441096	3.05021	0.00228679	0.234161	44.2305	111.121	2.51232	Not Sig	ENSMUSG00000032572	protein_coding	nonsignificant	collagen, type VI, alpha 4 [Source:MGI Symbol;Acc:MGI:1915803]
Gm11490	99.4313	0.916746	0.300698	3.04873	0.00229811	0.234276	68.7522	130.11	1.89245	Not Sig	ENSMUSG00000080976	processed_pseudogene	nonsignificant	predicted gene 11490 [Source:MGI Symbol;Acc:MGI:3651137]
Abtb3	1208.32	-0.330018	0.108332	-3.04637	0.00231626	0.234902	1346.67	1069.97	0.794528	Not Sig	ENSMUSG00000020042	protein_coding	nonsignificant	ankyrin repeat and BTB domain containing 3 [Source:MGI Symbol;Acc:MGI:1921257]
Gm37063	239.111	0.639641	0.209964	3.04644	0.00231571	0.234902	186.431	291.791	1.56515	Not Sig	ENSMUSG00000103805	TEC	nonsignificant	predicted gene, 37063 [Source:MGI Symbol;Acc:MGI:5610291]
Syt5	3692.22	-0.233486	0.0766662	-3.04549	0.00232299	0.234976	3991.5	3392.94	0.850041	Not Sig	ENSMUSG00000004961	protein_coding	nonsignificant	synaptotagmin V [Source:MGI Symbol;Acc:MGI:1926368]
Gm19031	202.275	0.765867	0.251583	3.04419	0.00233307	0.235388	149.234	255.316	1.71084	Not Sig	ENSMUSG00000093748	processed_pseudogene	nonsignificant	predicted gene, 19031 [Source:MGI Symbol;Acc:MGI:5011216]
Grem2	1499.68	-0.312598	0.102878	-3.03852	0.00237741	0.238021	1659.89	1339.48	0.806966	Not Sig	ENSMUSG00000050069	protein_coding	nonsignificant	gremlin 2, DAN family BMP antagonist [Source:MGI Symbol;Acc:MGI:1344367]
Cfap44	987.997	0.486988	0.16024	3.03912	0.00237268	0.238021	822.365	1153.63	1.40282	Not Sig	ENSMUSG00000071550	protein_coding	nonsignificant	cilia and flagella associated protein 44 [Source:MGI Symbol;Acc:MGI:1277238]
Gm19035	179.486	0.746487	0.245619	3.03921	0.00237199	0.238021	133.803	225.169	1.68284	Not Sig	ENSMUSG00000102232	transcribed_processed_pseudogene	nonsignificant	predicted gene, 19035 [Source:MGI Symbol;Acc:MGI:5011220]
Gm13134	27.0745	1.64225	0.540881	3.03625	0.00239539	0.239209	13.0094	41.1396	3.16229	Not Sig	ENSMUSG00000084987	lncRNA	nonsignificant	predicted gene 13134 [Source:MGI Symbol;Acc:MGI:3650641]
Olfm3	1802.79	-0.300057	0.0989435	-3.03261	0.00242449	0.241499	1989.65	1615.93	0.812169	Not Sig	ENSMUSG00000027965	protein_coding	nonsignificant	olfactomedin 3 [Source:MGI Symbol;Acc:MGI:2387329]
Gm45352	41.8284	1.32019	0.435588	3.03082	0.0024389	0.242318	24.0143	59.6425	2.48363	Not Sig	ENSMUSG00000110007	lncRNA	nonsignificant	predicted gene 45352 [Source:MGI Symbol;Acc:MGI:5791188]
Tox	989.468	-0.348871	0.115193	-3.02858	0.0024571	0.243508	1108.49	870.446	0.785254	Not Sig	ENSMUSG00000041272	protein_coding	nonsignificant	thymocyte selection-associated high mobility group box [Source:MGI Symbol;Acc:MGI:2181659]
Gm28320	441.088	0.440081	0.145445	3.02576	0.00248007	0.243559	374.057	508.12	1.3584	Not Sig	ENSMUSG00000099924	lncRNA	nonsignificant	predicted gene 28320 [Source:MGI Symbol;Acc:MGI:5579026]
Gm14399	1375.93	0.355384	0.117431	3.02633	0.0024754	0.243559	1206.19	1545.68	1.28146	Not Sig	ENSMUSG00000090093	protein_coding	nonsignificant	predicted gene 14399 [Source:MGI Symbol;Acc:MGI:3650082]
Spata31f1e	244.147	0.635101	0.209765	3.02768	0.00246439	0.243559	190.911	297.383	1.5577	Not Sig	ENSMUSG00000078722	protein_coding	nonsignificant	spermatogenesis associated 31 subfamily F member 1E [Source:MGI Symbol;Acc:MGI:3649790]
Mfrp	332.116	2.17398	0.718561	3.02547	0.0024825	0.243559	120.539	543.694	4.51052	Not Sig	ENSMUSG00000034739	protein_coding	nonsignificant	membrane frizzled-related protein [Source:MGI Symbol;Acc:MGI:2385957]
Gm26866	141.888	0.779317	0.258295	3.01716	0.00255158	0.244941	104.381	179.396	1.71867	Not Sig	ENSMUSG00000097642	processed_pseudogene	nonsignificant	predicted gene, 26866 [Source:MGI Symbol;Acc:MGI:5477360]
Prg4	253.036	-0.598994	0.198832	-3.01257	0.00259044	0.244941	305.502	200.571	0.656529	Not Sig	ENSMUSG00000006014	protein_coding	nonsignificant	proteoglycan 4 (megakaryocyte stimulating factor, articular superficial zone protein) [Source:MGI Symbol;Acc:MGI:1891344]
Gm13964	23.7966	1.6512	0.547302	3.01698	0.00255306	0.244941	11.4095	36.1838	3.17139	Not Sig	ENSMUSG00000087106	lncRNA	nonsignificant	predicted gene 13964 [Source:MGI Symbol;Acc:MGI:3649451]
Postn	217.456	0.841424	0.279288	3.01275	0.00258894	0.244941	155.436	279.476	1.79802	Not Sig	ENSMUSG00000027750	protein_coding	nonsignificant	periostin, osteoblast specific factor [Source:MGI Symbol;Acc:MGI:1926321]
Gm9989	103.152	-0.833891	0.276353	-3.01748	0.00254884	0.244941	132.364	73.9387	0.558599	Not Sig	ENSMUSG00000056023	lncRNA	nonsignificant	predicted gene 9989 [Source:MGI Symbol;Acc:MGI:3642361]
Abca4	501.241	1.72406	0.57126	3.01799	0.00254459	0.244941	232.934	769.548	3.30372	Not Sig	ENSMUSG00000028125	protein_coding	nonsignificant	ATP-binding cassette, sub-family A member 4 [Source:MGI Symbol;Acc:MGI:109424]
Gm42995	190.72	0.904437	0.300076	3.01403	0.00257805	0.244941	132.978	248.463	1.86845	Not Sig	ENSMUSG00000105495	TEC	nonsignificant	predicted gene 42995 [Source:MGI Symbol;Acc:MGI:5663132]
Gm42989	267.723	0.781793	0.259218	3.01597	0.0025616	0.244941	196.626	338.819	1.72316	Not Sig	ENSMUSG00000104994	TEC	nonsignificant	predicted gene 42989 [Source:MGI Symbol;Acc:MGI:5663126]
Rap1gap2	9898.91	-0.241214	0.0799475	-3.01715	0.0025516	0.244941	10726.5	9071.3	0.845689	Not Sig	ENSMUSG00000038807	protein_coding	nonsignificant	RAP1 GTPase activating protein 2 [Source:MGI Symbol;Acc:MGI:3028623]
Gm48887	309.415	0.669992	0.222385	3.01276	0.00258887	0.244941	238.358	380.472	1.59622	Not Sig	ENSMUSG00000113922	TEC	nonsignificant	predicted gene, 48887 [Source:MGI Symbol;Acc:MGI:6098646]
Shc3	4712.25	-0.237432	0.0787643	-3.01446	0.00257435	0.244941	5100.58	4323.93	0.847734	Not Sig	ENSMUSG00000021448	protein_coding	nonsignificant	src homology 2 domain-containing transforming protein C3 [Source:MGI Symbol;Acc:MGI:106179]
C130051F05Rik	165.478	0.793429	0.263045	3.01632	0.00255862	0.244941	120.745	210.212	1.74096	Not Sig	ENSMUSG00000114605	TEC	nonsignificant	RIKEN cDNA C130051F05 gene [Source:MGI Symbol;Acc:MGI:2443856]
Scara5	62.2325	1.5039	0.498339	3.01782	0.00254603	0.244941	32.4758	91.9892	2.83255	Not Sig	ENSMUSG00000022032	protein_coding	nonsignificant	scavenger receptor class A, member 5 [Source:MGI Symbol;Acc:MGI:1918395]
Syngr3	4202.91	-0.275995	0.091578	-3.01377	0.00258027	0.244941	4605.39	3800.42	0.825213	Not Sig	ENSMUSG00000007021	protein_coding	nonsignificant	synaptogyrin 3 [Source:MGI Symbol;Acc:MGI:1341881]
Sult1c2	9.81004	3.38786	1.12073	3.02289	0.0025037	0.244941	1.65944	17.9606	10.8233	Not Sig	ENSMUSG00000023122	protein_coding	nonsignificant	sulfotransferase family, cytosolic, 1C, member 2 [Source:MGI Symbol;Acc:MGI:1916333]
Cep170b	13424.6	-0.25155	0.0836466	-3.0073	0.00263583	0.248034	14593.7	12255.5	0.83978	Not Sig	ENSMUSG00000072825	protein_coding	nonsignificant	centrosomal protein 170B [Source:MGI Symbol;Acc:MGI:2145043]
Arhgap26	8011.5	-0.23992	0.0797604	-3.00801	0.00262964	0.248034	8677.47	7345.53	0.846505	Not Sig	ENSMUSG00000036452	protein_coding	nonsignificant	Rho GTPase activating protein 26 [Source:MGI Symbol;Acc:MGI:1918552]
Gm37011	449.405	0.445221	0.148168	3.00485	0.00265711	0.248034	380.403	518.407	1.36278	Not Sig	ENSMUSG00000103889	TEC	nonsignificant	predicted gene, 37011 [Source:MGI Symbol;Acc:MGI:5610239]
Gm29017	119.088	0.745945	0.248515	3.00161	0.00268554	0.248034	88.8845	149.291	1.6796	Not Sig	ENSMUSG00000101586	lncRNA	nonsignificant	predicted gene 29017 [Source:MGI Symbol;Acc:MGI:5579723]
D130019J16Rik	455.774	0.55385	0.184463	3.0025	0.00267769	0.248034	369.308	542.24	1.46826	Not Sig	ENSMUSG00000104145	TEC	nonsignificant	RIKEN cDNA D130019J16 gene [Source:MGI Symbol;Acc:MGI:2443523]
Bri3bp	12110.6	-0.211709	0.0705345	-3.0015	0.00268652	0.248034	12998.9	11222.4	0.86333	Not Sig	ENSMUSG00000037905	protein_coding	nonsignificant	Bri3 binding protein [Source:MGI Symbol;Acc:MGI:1924059]
Dusp26	1102.91	-0.32837	0.109238	-3.00601	0.00264697	0.248034	1228.7	977.116	0.795242	Not Sig	ENSMUSG00000039661	protein_coding	nonsignificant	dual specificity phosphatase 26 [Source:MGI Symbol;Acc:MGI:1914209]
Osbpl10	941.496	-0.308669	0.102821	-3.00199	0.00268222	0.248034	1041.08	841.912	0.808691	Not Sig	ENSMUSG00000040875	protein_coding	nonsignificant	oxysterol binding protein-like 10 [Source:MGI Symbol;Acc:MGI:1921736]
Krt18	102.409	2.32036	0.772848	3.00234	0.0026791	0.248034	34.2203	170.599	4.9853	Not Sig	ENSMUSG00000023043	protein_coding	nonsignificant	keratin 18 [Source:MGI Symbol;Acc:MGI:96692]
Gap43	5834.83	-0.270201	0.0899045	-3.00542	0.00265213	0.248034	6381.23	5288.43	0.828749	Not Sig	ENSMUSG00000047261	protein_coding	nonsignificant	growth associated protein 43 [Source:MGI Symbol;Acc:MGI:95639]
Mlf1	74.436	1.00869	0.336503	2.99757	0.00272143	0.24858	49.4502	99.4218	2.01054	Not Sig	ENSMUSG00000048416	protein_coding	nonsignificant	myeloid leukemia factor 1 [Source:MGI Symbol;Acc:MGI:1341819]
B230319C09Rik	118.063	0.777124	0.259242	2.99768	0.00272046	0.24858	86.7213	149.405	1.72282	Not Sig	ENSMUSG00000051844	lncRNA	nonsignificant	RIKEN cDNA B230319C09 gene [Source:MGI Symbol;Acc:MGI:2444713]
Acp1	1918.6	-0.356289	0.118871	-2.99726	0.00272418	0.24858	2154.03	1683.18	0.781413	Not Sig	ENSMUSG00000044573	protein_coding	nonsignificant	acid phosphatase 1, soluble [Source:MGI Symbol;Acc:MGI:87881]
Gm7818	558.751	-0.376655	0.125595	-2.99897	0.0027089	0.24858	631.862	485.64	0.768585	Not Sig	ENSMUSG00000117234	transcribed_processed_pseudogene	nonsignificant	predicted gene 7818 [Source:MGI Symbol;Acc:MGI:3643608]
5031415H12Rik	590.801	0.395786	0.132	2.99838	0.00271421	0.24858	509.425	672.176	1.31948	Not Sig	ENSMUSG00000097282	lncRNA	nonsignificant	RIKEN cDNA 5031415H12 gene [Source:MGI Symbol;Acc:MGI:1923234]
Agbl2	127.075	0.793838	0.265261	2.99266	0.00276554	0.251767	92.7369	161.413	1.74055	Not Sig	ENSMUSG00000040812	protein_coding	nonsignificant	ATP/GTP binding protein-like 2 [Source:MGI Symbol;Acc:MGI:2443254]
Gm37578	146.464	0.861727	0.288307	2.98892	0.00279963	0.251941	103.724	189.204	1.82411	Not Sig	ENSMUSG00000102391	TEC	nonsignificant	predicted gene, 37578 [Source:MGI Symbol;Acc:MGI:5610806]
Tshz2	6556.82	-0.698099	0.233395	-2.99106	0.00278012	0.251941	8112.74	5000.89	0.616424	Not Sig	ENSMUSG00000047907	protein_coding	nonsignificant	teashirt zinc finger family member 2 [Source:MGI Symbol;Acc:MGI:2153084]
Fgfr3	4493.63	-0.257577	0.0861754	-2.98898	0.00279908	0.251941	4895.25	4092.02	0.835916	Not Sig	ENSMUSG00000054252	protein_coding	nonsignificant	fibroblast growth factor receptor 3 [Source:MGI Symbol;Acc:MGI:95524]
A230103L15Rik	3503.45	0.369708	0.123626	2.99054	0.00278482	0.251941	3055.65	3951.25	1.2931	Not Sig	ENSMUSG00000109122	TEC	nonsignificant	RIKEN cDNA A230103L15 gene [Source:MGI Symbol;Acc:MGI:1925005]
Gm47826	478.054	0.42908	0.143523	2.98962	0.00279323	0.251941	406.758	549.35	1.35056	Not Sig	ENSMUSG00000113650	TEC	nonsignificant	predicted gene, 47826 [Source:MGI Symbol;Acc:MGI:6097020]
Dtnb	3753.93	-0.218957	0.0732803	-2.98794	0.00280866	0.252173	4038.26	3469.59	0.85918	Not Sig	ENSMUSG00000071454	protein_coding	nonsignificant	dystrobrevin, beta [Source:MGI Symbol;Acc:MGI:1203728]
Otx2os1	18.6479	2.33498	0.781813	2.98662	0.00282076	0.252681	6.22869	31.0672	4.98776	Not Sig	ENSMUSG00000098682	lncRNA	nonsignificant	orthodenticle homeobox 2 opposite strand 1 [Source:MGI Symbol;Acc:MGI:3583292]
Bend6	4717.3	-0.221567	0.0742678	-2.98335	0.00285112	0.254817	5079.15	4355.45	0.857515	Not Sig	ENSMUSG00000042182	protein_coding	nonsignificant	BEN domain containing 6 [Source:MGI Symbol;Acc:MGI:2444572]
Gm14443	1267.67	0.38837	0.130234	2.9821	0.00286279	0.255255	1097.41	1437.92	1.31028	Not Sig	ENSMUSG00000078902	protein_coding	nonsignificant	predicted gene 14443 [Source:MGI Symbol;Acc:MGI:3652324]
4933413C19Rik	62.0765	1.2687	0.425535	2.98143	0.00286906	0.255255	36.3215	87.8315	2.41817	Not Sig	ENSMUSG00000089952	lncRNA	nonsignificant	RIKEN cDNA 4933413C19 gene [Source:MGI Symbol;Acc:MGI:1921702]
Gm16523	467.219	0.465312	0.156217	2.97862	0.00289548	0.257022	392.158	542.28	1.38281	Not Sig	ENSMUSG00000082315	transcribed_processed_pseudogene	nonsignificant	predicted gene, 16523 [Source:MGI Symbol;Acc:MGI:4360990]
Antxr2	225.869	0.528885	0.177663	2.97689	0.00291186	0.25789	184.816	266.921	1.44425	Not Sig	ENSMUSG00000029338	protein_coding	nonsignificant	anthrax toxin receptor 2 [Source:MGI Symbol;Acc:MGI:1919164]
Them4	1236.41	-0.305834	0.102824	-2.97434	0.00293624	0.258878	1365.86	1106.96	0.810451	Not Sig	ENSMUSG00000028145	protein_coding	nonsignificant	thioesterase superfamily member 4 [Source:MGI Symbol;Acc:MGI:1923028]
Camk2g	9576.26	-0.224752	0.0755461	-2.97503	0.00292964	0.258878	10320.3	8832.18	0.855803	Not Sig	ENSMUSG00000021820	protein_coding	nonsignificant	calcium/calmodulin-dependent protein kinase II gamma [Source:MGI Symbol;Acc:MGI:88259]
Htr5a	1004.87	-0.34054	0.114646	-2.97035	0.00297462	0.261673	1123.49	886.256	0.788841	Not Sig	ENSMUSG00000039106	protein_coding	nonsignificant	5-hydroxytryptamine (serotonin) receptor 5A [Source:MGI Symbol;Acc:MGI:96283]
Epn3	135.233	1.02297	0.344744	2.96734	0.00300387	0.263654	88.9576	181.509	2.0404	Not Sig	ENSMUSG00000010080	protein_coding	nonsignificant	epsin 3 [Source:MGI Symbol;Acc:MGI:1919139]
Gm29112	46.6307	1.17777	0.397119	2.96579	0.00301908	0.264396	28.7115	64.5499	2.24822	Not Sig	ENSMUSG00000100815	lncRNA	nonsignificant	predicted gene 29112 [Source:MGI Symbol;Acc:MGI:5579818]
Gm49283	124.792	0.856594	0.289038	2.9636	0.00304059	0.265685	88.7949	160.789	1.81079	Not Sig	ENSMUSG00000115073	TEC	nonsignificant	predicted gene, 49283 [Source:MGI Symbol;Acc:MGI:6118769]
Ttc16	62.4013	0.988055	0.333475	2.9629	0.00304751	0.265696	42.0253	82.7774	1.9697	Not Sig	ENSMUSG00000039021	protein_coding	nonsignificant	tetratricopeptide repeat domain 16 [Source:MGI Symbol;Acc:MGI:2443048]
Gm42496	18.8221	1.81356	0.612473	2.96104	0.003066	0.266715	8.35551	29.2887	3.50531	Not Sig	ENSMUSG00000105772	TEC	nonsignificant	predicted gene 42496 [Source:MGI Symbol;Acc:MGI:5662633]
Gm15508	3.33267	5.3563	1.81365	2.95333	0.00314362	0.27286	0	6.66534	Inf	Not Sig	ENSMUSG00000089831	processed_pseudogene	nonsignificant	predicted gene 15508 [Source:MGI Symbol;Acc:MGI:3782956]
Gm37573	446.537	0.646599	0.219283	2.9487	0.00319115	0.275763	347.522	545.552	1.56983	Not Sig	ENSMUSG00000102397	lncRNA	nonsignificant	predicted gene, 37573 [Source:MGI Symbol;Acc:MGI:5610801]
Slc28a3	51.0486	1.71277	0.580766	2.94917	0.00318633	0.275763	23.9449	78.1524	3.26384	Not Sig	ENSMUSG00000021553	protein_coding	nonsignificant	solute carrier family 28 (sodium-coupled nucleoside transporter), member 3 [Source:MGI Symbol;Acc:MGI:2137361]
Gm48759	138.595	0.868992	0.294835	2.94738	0.0032048	0.276332	97.928	179.262	1.83055	Not Sig	ENSMUSG00000112303	lncRNA	nonsignificant	predicted gene, 48759 [Source:MGI Symbol;Acc:MGI:6098440]
Gm43880	400.041	0.663478	0.225288	2.94502	0.00322935	0.277837	308.924	491.157	1.5899	Not Sig	ENSMUSG00000107886	TEC	nonsignificant	predicted gene, 43880 [Source:MGI Symbol;Acc:MGI:5690272]
Gm26647	108.436	0.825931	0.280753	2.94184	0.00326272	0.278262	77.7701	139.101	1.78862	Not Sig	ENSMUSG00000097686	lncRNA	nonsignificant	predicted gene, 26647 [Source:MGI Symbol;Acc:MGI:5477141]
Stard10	521.062	-0.426466	0.144909	-2.94299	0.00325054	0.278262	597.077	445.047	0.745376	Not Sig	ENSMUSG00000030688	protein_coding	nonsignificant	StAR related lipid transfer domain containing 10 [Source:MGI Symbol;Acc:MGI:1860093]
Gm20642	816.074	0.523617	0.177911	2.94314	0.00324903	0.278262	668.876	963.271	1.44013	Not Sig	ENSMUSG00000093383	lncRNA	nonsignificant	predicted gene 20642 [Source:MGI Symbol;Acc:MGI:5313089]
Septin6	3804.86	-0.240093	0.0815958	-2.94247	0.00325605	0.278262	4121.72	3488.01	0.846252	Not Sig	ENSMUSG00000050379	protein_coding	nonsignificant	septin 6 [Source:MGI Symbol;Acc:MGI:1888939]
Gm10862	643.773	1.00411	0.341437	2.94082	0.0032734	0.278566	428.262	859.284	2.00645	Not Sig	ENSMUSG00000104284	lncRNA	nonsignificant	predicted gene 10862 [Source:MGI Symbol;Acc:MGI:3641622]
Adam4	256.509	0.56187	0.191595	2.93259	0.0033615	0.285443	206.854	306.164	1.48009	Not Sig	ENSMUSG00000072972	protein_coding	nonsignificant	a disintegrin and metallopeptidase domain 4 [Source:MGI Symbol;Acc:MGI:104731]
Cdh7	845.25	-0.362355	0.123674	-2.92992	0.00339049	0.286435	951.308	739.191	0.777026	Not Sig	ENSMUSG00000026312	protein_coding	nonsignificant	cadherin 7, type 2 [Source:MGI Symbol;Acc:MGI:2442792]
Gm44806	82.0442	0.835165	0.285088	2.9295	0.00339513	0.286435	59.0451	105.043	1.77903	Not Sig	ENSMUSG00000108790	TEC	nonsignificant	predicted gene 44806 [Source:MGI Symbol;Acc:MGI:5753382]
A530046M15Rik	158.447	0.795508	0.271431	2.93079	0.00338098	0.286435	115.69	201.204	1.73916	Not Sig	ENSMUSG00000113338	lncRNA	nonsignificant	RIKEN cDNA A530046M15 gene [Source:MGI Symbol;Acc:MGI:5439406]
Prcp	647.055	-0.360139	0.123121	-2.92507	0.00344376	0.289913	727.494	566.615	0.778859	Not Sig	ENSMUSG00000061119	protein_coding	nonsignificant	prolylcarboxypeptidase (angiotensinase C) [Source:MGI Symbol;Acc:MGI:1919711]
Gm9929	77.4681	0.871381	0.29801	2.924	0.00345561	0.290058	54.7701	100.166	1.82885	Not Sig	ENSMUSG00000053925	lncRNA	nonsignificant	predicted gene 9929 [Source:MGI Symbol;Acc:MGI:3708526]
Atp1b2	20242.3	-0.181916	0.0622237	-2.92358	0.0034603	0.290058	21517.5	18967.1	0.881472	Not Sig	ENSMUSG00000041329	protein_coding	nonsignificant	ATPase, Na+/K+ transporting, beta 2 polypeptide [Source:MGI Symbol;Acc:MGI:88109]
Gm42589	171.978	0.800332	0.273894	2.92205	0.00347733	0.290862	125.107	218.848	1.74929	Not Sig	ENSMUSG00000105470	TEC	nonsignificant	predicted gene 42589 [Source:MGI Symbol;Acc:MGI:5662726]
Grip1os2	65.5241	1.22654	0.420058	2.91992	0.00350118	0.292233	39.3311	91.7171	2.33192	Not Sig	ENSMUSG00000084764	lncRNA	nonsignificant	glutamate receptor interacting protein 1, opposite strand 2 [Source:MGI Symbol;Acc:MGI:1922571]
Gm44434	202.491	0.708979	0.24287	2.91917	0.00350967	0.292319	153.365	251.616	1.64063	Not Sig	ENSMUSG00000107813	TEC	nonsignificant	predicted gene, 44434 [Source:MGI Symbol;Acc:MGI:5690826]
Gm42559	242.157	0.514854	0.176447	2.9179	0.00352395	0.292884	199.089	285.225	1.43265	Not Sig	ENSMUSG00000107227	TEC	nonsignificant	predicted gene 42559 [Source:MGI Symbol;Acc:MGI:5662696]
Gm49555	391.256	0.666201	0.22841	2.91668	0.00353775	0.293409	301.906	480.606	1.59191	Not Sig	ENSMUSG00000116735	TEC	nonsignificant	predicted gene, 49555 [Source:MGI Symbol;Acc:MGI:6214938]
Gng3	5145.55	-0.245999	0.0843702	-2.91571	0.00354886	0.293707	5584.66	4706.44	0.842744	Not Sig	ENSMUSG00000071658	protein_coding	nonsignificant	guanine nucleotide binding protein (G protein), gamma 3 [Source:MGI Symbol;Acc:MGI:102704]
Gm37777	381.536	0.61849	0.212442	2.91133	0.00359889	0.296876	300.469	462.603	1.53961	Not Sig	ENSMUSG00000102698	TEC	nonsignificant	predicted gene, 37777 [Source:MGI Symbol;Acc:MGI:5611005]
Gm38043	582.665	0.442146	0.151886	2.91104	0.00360231	0.296876	493.294	672.036	1.36234	Not Sig	ENSMUSG00000104293	TEC	nonsignificant	predicted gene, 38043 [Source:MGI Symbol;Acc:MGI:5611271]
1700123O21Rik	153.447	0.87503	0.300692	2.91005	0.0036137	0.297189	108.273	198.622	1.83445	Not Sig	ENSMUSG00000101481	lncRNA	nonsignificant	RIKEN cDNA 1700123O21 gene [Source:MGI Symbol;Acc:MGI:1915488]
Fmod	569.875	-0.529354	0.182263	-2.90434	0.00368029	0.29878	674.42	465.331	0.689972	Not Sig	ENSMUSG00000041559	protein_coding	nonsignificant	fibromodulin [Source:MGI Symbol;Acc:MGI:1328364]
F5	1042.39	2.44265	0.841304	2.90342	0.00369117	0.29878	323.957	1760.82	5.43537	Not Sig	ENSMUSG00000026579	protein_coding	nonsignificant	coagulation factor V [Source:MGI Symbol;Acc:MGI:88382]
Ccdc141	1707.78	0.31615	0.10886	2.90419	0.00368205	0.29878	1520.11	1895.45	1.24691	Not Sig	ENSMUSG00000044033	protein_coding	nonsignificant	coiled-coil domain containing 141 [Source:MGI Symbol;Acc:MGI:1919735]
Paqr6	185.962	-0.626624	0.215564	-2.90691	0.0036502	0.29878	225.595	146.328	0.648632	Not Sig	ENSMUSG00000041423	protein_coding	nonsignificant	progestin and adipoQ receptor family member VI [Source:MGI Symbol;Acc:MGI:1916207]
Gm13200	4.58579	4.80811	1.65446	2.90616	0.00365897	0.29878	0.281673	8.88991	31.5611	Not Sig	ENSMUSG00000086326	lncRNA	nonsignificant	predicted gene 13200 [Source:MGI Symbol;Acc:MGI:3650195]
5330406M23Rik	739.967	0.492266	0.169489	2.90442	0.00367934	0.29878	614.704	865.229	1.40755	Not Sig	ENSMUSG00000104030	TEC	nonsignificant	RIKEN cDNA 5330406M23 gene [Source:MGI Symbol;Acc:MGI:1923921]
Hrh1	286.967	-0.494362	0.170237	-2.90397	0.00368462	0.29878	336.118	237.815	0.707535	Not Sig	ENSMUSG00000053004	protein_coding	nonsignificant	histamine receptor H1 [Source:MGI Symbol;Acc:MGI:107619]
Gm9712	4.61638	4.81049	1.65698	2.90317	0.00369411	0.29878	0.281673	8.95108	31.7783	Not Sig	ENSMUSG00000109673	processed_pseudogene	nonsignificant	predicted gene 9712 [Source:MGI Symbol;Acc:MGI:3780120]
Gm15810	174.314	0.688616	0.23742	2.90041	0.00372676	0.300799	133.621	215.008	1.60909	Not Sig	ENSMUSG00000089710	lncRNA	nonsignificant	predicted gene 15810 [Source:MGI Symbol;Acc:MGI:3802042]
Gm43526	177.284	0.739159	0.254955	2.89918	0.00374143	0.301362	132.473	222.094	1.67652	Not Sig	ENSMUSG00000105803	TEC	nonsignificant	predicted gene 43526 [Source:MGI Symbol;Acc:MGI:5663663]
Wdr86	91.7024	1.26666	0.437224	2.89704	0.00376697	0.302796	53.827	129.578	2.4073	Not Sig	ENSMUSG00000055235	protein_coding	nonsignificant	WD repeat domain 86 [Source:MGI Symbol;Acc:MGI:1915466]
Nrsn2	1401.57	-0.349864	0.120874	-2.89447	0.00379802	0.302805	1571.91	1231.23	0.783269	Not Sig	ENSMUSG00000059361	protein_coding	nonsignificant	neurensin 2 [Source:MGI Symbol;Acc:MGI:2684969]
Tbc1d30	4325.74	-0.241439	0.0834119	-2.89454	0.0037971	0.302805	4687.15	3964.34	0.845789	Not Sig	ENSMUSG00000052302	protein_coding	nonsignificant	TBC1 domain family, member 30 [Source:MGI Symbol;Acc:MGI:1921944]
Mapk8	8761.29	-0.188643	0.0651655	-2.89482	0.00379373	0.302805	9333.9	8188.67	0.877304	Not Sig	ENSMUSG00000021936	protein_coding	nonsignificant	mitogen-activated protein kinase 8 [Source:MGI Symbol;Acc:MGI:1346861]
Gm15712	361.02	0.645574	0.223006	2.89488	0.00379309	0.302805	281.244	440.795	1.5673	Not Sig	ENSMUSG00000083827	processed_pseudogene	nonsignificant	predicted gene 15712 [Source:MGI Symbol;Acc:MGI:3783154]
Pcdh10	10712.3	-0.199732	0.0691071	-2.89018	0.00385016	0.305726	11453.1	9971.45	0.870636	Not Sig	ENSMUSG00000049100	protein_coding	nonsignificant	protocadherin 10 [Source:MGI Symbol;Acc:MGI:1338042]
Cyrib	9060.36	-0.20149	0.0697155	-2.89017	0.00385028	0.305726	9691.4	8429.33	0.869774	Not Sig	ENSMUSG00000022378	protein_coding	nonsignificant	CYFIP related Rac1 interactor B [Source:MGI Symbol;Acc:MGI:1923520]
Gm37409	110.803	0.835641	0.289326	2.88823	0.00387412	0.306997	79.2545	142.352	1.79613	Not Sig	ENSMUSG00000103495	TEC	nonsignificant	predicted gene, 37409 [Source:MGI Symbol;Acc:MGI:5610637]
Gvin-ps7	233.223	0.556787	0.192865	2.88692	0.00389029	0.307655	188.672	277.775	1.47226	Not Sig	ENSMUSG00000063286	transcribed_unprocessed_pseudogene	nonsignificant	GTPase, very large interferon inducible, pseudogene 7 [Source:MGI Symbol;Acc:MGI:3644223]
Gm37186	425.294	0.447499	0.155065	2.88589	0.00390308	0.308044	359.189	491.399	1.36808	Not Sig	ENSMUSG00000103937	TEC	nonsignificant	predicted gene, 37186 [Source:MGI Symbol;Acc:MGI:5610414]
Vopp1	3625.95	-0.21102	0.0731531	-2.88463	0.00391873	0.308657	3891.19	3360.7	0.863668	Not Sig	ENSMUSG00000037788	protein_coding	nonsignificant	vesicular, overexpressed in cancer, prosurvival protein 1 [Source:MGI Symbol;Acc:MGI:2141658]
Gm43099	642.158	0.353968	0.122744	2.88379	0.00392921	0.308861	563.094	721.223	1.28082	Not Sig	ENSMUSG00000105358	TEC	nonsignificant	predicted gene 43099 [Source:MGI Symbol;Acc:MGI:5663236]
Nxpe2	75.4064	1.19631	0.414953	2.88299	0.00393915	0.309022	45.5751	105.238	2.3091	Not Sig	ENSMUSG00000032028	protein_coding	nonsignificant	neurexophilin and PC-esterase domain family, member 2 [Source:MGI Symbol;Acc:MGI:1925502]
Spta1	21.5176	2.04241	0.709038	2.88054	0.00396997	0.310817	8.28394	34.7513	4.19502	Not Sig	ENSMUSG00000026532	protein_coding	nonsignificant	spectrin alpha, erythrocytic 1 [Source:MGI Symbol;Acc:MGI:98385]
Gm37297	116.917	0.724026	0.251578	2.87794	0.00400281	0.311519	88.1628	145.671	1.65229	Not Sig	ENSMUSG00000104114	TEC	nonsignificant	predicted gene, 37297 [Source:MGI Symbol;Acc:MGI:5610525]
Mfn2	9623.38	-0.223841	0.0777496	-2.879	0.00398934	0.311519	10370.3	8876.5	0.855957	Not Sig	ENSMUSG00000029020	protein_coding	nonsignificant	mitofusin 2 [Source:MGI Symbol;Acc:MGI:2442230]
Gm45394	144.158	0.765744	0.266028	2.87843	0.00399657	0.311519	106.576	181.741	1.70527	Not Sig	ENSMUSG00000110132	TEC	nonsignificant	predicted gene 45394 [Source:MGI Symbol;Acc:MGI:5791230]
Spata46	46.7212	1.1048	0.384278	2.875	0.00404029	0.313812	29.8167	63.6257	2.13389	Not Sig	ENSMUSG00000042800	protein_coding	nonsignificant	spermatogenesis associated 46 [Source:MGI Symbol;Acc:MGI:1924175]
Elapor2	4858.1	-0.231659	0.0806382	-2.87281	0.00406834	0.315365	5248.3	4467.9	0.851304	Not Sig	ENSMUSG00000056004	protein_coding	nonsignificant	endosome-lysosome associated apoptosis and autophagy regulator family member 2 [Source:MGI Symbol;Acc:MGI:2443264]
Scnn1g	15.0107	-2.10598	0.733494	-2.87116	0.00408972	0.315772	24.6309	5.39058	0.218855	Not Sig	ENSMUSG00000000216	protein_coding	nonsignificant	sodium channel, nonvoltage-gated 1 gamma [Source:MGI Symbol;Acc:MGI:104695]
Drc7	273.309	2.02199	0.704106	2.87172	0.00408249	0.315772	108.03	438.588	4.05988	Not Sig	ENSMUSG00000031786	protein_coding	nonsignificant	dynein regulatory complex subunit 7 [Source:MGI Symbol;Acc:MGI:2685616]
Gm37212	199.671	0.666714	0.232476	2.86789	0.00413223	0.317374	153.998	245.344	1.59316	Not Sig	ENSMUSG00000104026	TEC	nonsignificant	predicted gene, 37212 [Source:MGI Symbol;Acc:MGI:5610440]
Fxyd7	1175.16	-0.339466	0.118376	-2.86769	0.00413479	0.317374	1313.54	1036.77	0.789295	Not Sig	ENSMUSG00000036578	protein_coding	nonsignificant	FXYD domain-containing ion transport regulator 7 [Source:MGI Symbol;Acc:MGI:1889006]
Gm534	17.8334	2.56792	0.895153	2.86869	0.0041217	0.317374	5.15524	30.5116	5.91856	Not Sig	ENSMUSG00000115398	lncRNA	nonsignificant	predicted gene 534 [Source:MGI Symbol;Acc:MGI:2685380]
Mov10	622.118	0.39659	0.138402	2.86549	0.00416359	0.318336	537.174	707.062	1.31626	Not Sig	ENSMUSG00000002227	protein_coding	nonsignificant	Mov10 RISC complex RNA helicase [Source:MGI Symbol;Acc:MGI:97054]
Gm42970	263.521	0.725236	0.253045	2.86603	0.00415652	0.318336	197.986	329.055	1.66201	Not Sig	ENSMUSG00000106446	TEC	nonsignificant	predicted gene 42970 [Source:MGI Symbol;Acc:MGI:5663107]
Atp10d	350.945	0.62736	0.218985	2.86485	0.00417207	0.318362	275.664	426.225	1.54618	Not Sig	ENSMUSG00000046808	protein_coding	nonsignificant	ATPase, class V, type 10D [Source:MGI Symbol;Acc:MGI:2450125]
Gm13131	3.12824	5.26501	1.84008	2.8613	0.00421907	0.318475	0	6.25648	Inf	Not Sig	ENSMUSG00000081772	processed_pseudogene	nonsignificant	predicted gene 13131 [Source:MGI Symbol;Acc:MGI:3651062]
Gm42444	436.633	0.537002	0.187714	2.86075	0.00422643	0.318475	355.589	517.676	1.45583	Not Sig	ENSMUSG00000106048	TEC	nonsignificant	predicted gene 42444 [Source:MGI Symbol;Acc:MGI:5662581]
Slc25a18	1636.43	-0.338349	0.118286	-2.86044	0.0042305	0.318475	1827.92	1444.95	0.79049	Not Sig	ENSMUSG00000004902	protein_coding	nonsignificant	solute carrier family 25 (mitochondrial carrier), member 18 [Source:MGI Symbol;Acc:MGI:1919053]
Gm20100	5.68334	4.21062	1.4711	2.86223	0.00420673	0.318475	0.563346	10.8033	19.1771	Not Sig	ENSMUSG00000110245	TEC	nonsignificant	predicted gene, 20100 [Source:MGI Symbol;Acc:MGI:5012285]
Mtmr7	3410.56	-0.213975	0.074804	-2.86047	0.0042301	0.318475	3662.59	3158.54	0.862379	Not Sig	ENSMUSG00000039431	protein_coding	nonsignificant	myotubularin related protein 7 [Source:MGI Symbol;Acc:MGI:1891693]
Gm48869	189.191	0.646465	0.225812	2.86285	0.00419847	0.318475	147.221	231.16	1.57015	Not Sig	ENSMUSG00000113869	processed_pseudogene	nonsignificant	predicted gene, 48869 [Source:MGI Symbol;Acc:MGI:6098615]
Cfap43	449.722	0.575288	0.200881	2.86382	0.0041856	0.318475	361.288	538.155	1.48954	Not Sig	ENSMUSG00000044948	protein_coding	nonsignificant	cilia and flagella associated protein 43 [Source:MGI Symbol;Acc:MGI:1289258]
Inhca	32.8988	1.28054	0.447863	2.85922	0.00424683	0.31848	19.1787	46.6189	2.43077	Not Sig	ENSMUSG00000033688	protein_coding	nonsignificant	inhibitor of carbonic anhydrase [Source:MGI Symbol;Acc:MGI:1919025]
Gm12333	58.9214	0.990041	0.346249	2.85933	0.00424535	0.31848	39.3334	78.5094	1.996	Not Sig	ENSMUSG00000085765	lncRNA	nonsignificant	predicted gene 12333 [Source:MGI Symbol;Acc:MGI:3652064]
1700001D01Rik	56.585	0.973554	0.340718	2.85736	0.00427183	0.319132	38.0392	75.1308	1.97509	Not Sig	ENSMUSG00000099419	lncRNA	nonsignificant	RIKEN cDNA 1700001D01 gene [Source:MGI Symbol;Acc:MGI:1916529]
Gm49565	893.404	0.500873	0.175261	2.85787	0.00426489	0.319132	739.626	1047.18	1.41582	Not Sig	ENSMUSG00000116738	TEC	nonsignificant	predicted gene, 49565 [Source:MGI Symbol;Acc:MGI:6214954]
Gm43113	154.581	0.700578	0.245241	2.8567	0.00428077	0.31919	117.737	191.426	1.62588	Not Sig	ENSMUSG00000105062	lncRNA	nonsignificant	predicted gene 43113 [Source:MGI Symbol;Acc:MGI:5663250]
Gm11447	67.7834	0.888027	0.310981	2.85557	0.004296	0.319717	47.4271	88.1398	1.85842	Not Sig	ENSMUSG00000081854	processed_pseudogene	nonsignificant	predicted gene 11447 [Source:MGI Symbol;Acc:MGI:3651506]
Masp2	89.6732	0.774421	0.271267	2.85483	0.00430597	0.319851	66.2236	113.123	1.7082	Not Sig	ENSMUSG00000028979	protein_coding	nonsignificant	MBL associated serine protease 2 [Source:MGI Symbol;Acc:MGI:1330832]
Enpp2	31223.8	1.86631	0.653922	2.85403	0.0043168	0.320048	13441.2	49006.4	3.64599	Not Sig	ENSMUSG00000022425	protein_coding	nonsignificant	ectonucleotide pyrophosphatase/phosphodiesterase 2 [Source:MGI Symbol;Acc:MGI:1321390]
Gm48004	79.6047	0.864106	0.302924	2.85256	0.00433692	0.320932	56.2984	102.911	1.82796	Not Sig	ENSMUSG00000114595	lncRNA	nonsignificant	predicted gene, 48004 [Source:MGI Symbol;Acc:MGI:6097306]
Gm16351	45.8055	1.23479	0.433032	2.85151	0.00435125	0.321385	27.2743	64.3366	2.35887	Not Sig	ENSMUSG00000084954	lncRNA	nonsignificant	predicted gene 16351 [Source:MGI Symbol;Acc:MGI:3840153]
Hs6st2	2143.81	-0.234999	0.08244	-2.85055	0.00436439	0.321748	2318.59	1969.03	0.849235	Not Sig	ENSMUSG00000062184	protein_coding	nonsignificant	heparan sulfate 6-O-sulfotransferase 2 [Source:MGI Symbol;Acc:MGI:1354959]
Nmnat2	11057.3	-0.185631	0.0651408	-2.8497	0.00437608	0.322004	11768.8	10345.7	0.879075	Not Sig	ENSMUSG00000042751	protein_coding	nonsignificant	nicotinamide nucleotide adenylyltransferase 2 [Source:MGI Symbol;Acc:MGI:2444155]
Gm29014	3.06057	5.23622	1.83919	2.84703	0.00441298	0.322898	0	6.12114	Inf	Not Sig	ENSMUSG00000099582	processed_pseudogene	nonsignificant	predicted gene 29014 [Source:MGI Symbol;Acc:MGI:5579720]
Gm44926	314.364	0.677356	0.237825	2.84813	0.00439764	0.322898	241.254	387.473	1.60608	Not Sig	ENSMUSG00000108983	TEC	nonsignificant	predicted gene 44926 [Source:MGI Symbol;Acc:MGI:5753502]
Ogdhl	4539.65	-0.210708	0.0740062	-2.84717	0.00441096	0.322898	4871.07	4208.22	0.863921	Not Sig	ENSMUSG00000021913	protein_coding	nonsignificant	oxoglutarate dehydrogenase-like [Source:MGI Symbol;Acc:MGI:3616088]
Prelp	1032	0.36018	0.126603	2.84495	0.00444178	0.323808	903.576	1160.43	1.28426	Not Sig	ENSMUSG00000041577	protein_coding	nonsignificant	proline arginine-rich end leucine-rich repeat [Source:MGI Symbol;Acc:MGI:2151110]
Gm42706	32.2566	1.33025	0.46768	2.84435	0.00445023	0.323808	18.2606	46.2526	2.53291	Not Sig	ENSMUSG00000106524	lncRNA	nonsignificant	predicted gene 42706 [Source:MGI Symbol;Acc:MGI:5662843]
Chst8	798.889	-0.330725	0.116256	-2.84481	0.00444374	0.323808	890.892	706.887	0.79346	Not Sig	ENSMUSG00000060402	protein_coding	nonsignificant	carbohydrate sulfotransferase 8 [Source:MGI Symbol;Acc:MGI:1916197]
Tgtp1	33.3571	1.38795	0.488305	2.84239	0.00447765	0.325199	18.4393	48.2749	2.61804	Not Sig	ENSMUSG00000078922	protein_coding	nonsignificant	T cell specific GTPase 1 [Source:MGI Symbol;Acc:MGI:98734]
Bhmt	7.22778	3.19426	1.12531	2.83857	0.00453168	0.328513	1.38541	13.0702	9.43411	Not Sig	ENSMUSG00000074768	protein_coding	nonsignificant	betaine-homocysteine methyltransferase [Source:MGI Symbol;Acc:MGI:1339972]
Gm13833	288.203	0.586918	0.206997	2.83539	0.004577	0.331168	230.392	346.014	1.50185	Not Sig	ENSMUSG00000087312	lncRNA	nonsignificant	predicted gene 13833 [Source:MGI Symbol;Acc:MGI:3650920]
Gng4	1518.6	-0.308576	0.108852	-2.83481	0.00458522	0.331168	1680.98	1356.22	0.806804	Not Sig	ENSMUSG00000021303	protein_coding	nonsignificant	guanine nucleotide binding protein (G protein), gamma 4 [Source:MGI Symbol;Acc:MGI:102703]
1700111E14Rik	128.739	0.749359	0.264859	2.82928	0.00466531	0.336332	95.9824	161.496	1.68255	Not Sig	ENSMUSG00000029837	lncRNA	nonsignificant	RIKEN cDNA 1700111E14 gene [Source:MGI Symbol;Acc:MGI:1920835]
Gm43112	211.337	0.633138	0.223907	2.82769	0.00468853	0.336964	165.397	257.277	1.55552	Not Sig	ENSMUSG00000106212	lncRNA	nonsignificant	predicted gene 43112 [Source:MGI Symbol;Acc:MGI:5663249]
Gm47479	95.4089	0.856803	0.303088	2.82691	0.0046999	0.336964	67.7174	123.101	1.81786	Not Sig	ENSMUSG00000114696	TEC	nonsignificant	predicted gene, 47479 [Source:MGI Symbol;Acc:MGI:6096452]
Gm16310	104.041	0.718047	0.254002	2.82693	0.0046996	0.336964	78.6609	129.422	1.64531	Not Sig	ENSMUSG00000086331	lncRNA	nonsignificant	predicted gene 16310 [Source:MGI Symbol;Acc:MGI:3826522]
Gm20696	217.636	0.523385	0.185224	2.82568	0.00471797	0.337641	178.806	256.466	1.43432	Not Sig	ENSMUSG00000030068	protein_coding	nonsignificant	predicted gene 20696 [Source:MGI Symbol;Acc:MGI:5313143]
Gm14020	61.1065	1.03713	0.367504	2.82208	0.00477135	0.340217	40.1599	82.0531	2.04316	Not Sig	ENSMUSG00000084244	transcribed_processed_pseudogene	nonsignificant	predicted gene 14020 [Source:MGI Symbol;Acc:MGI:3651446]
Gm42943	428.652	0.633473	0.224426	2.82263	0.00476312	0.340217	335.672	521.633	1.554	Not Sig	ENSMUSG00000106385	TEC	nonsignificant	predicted gene 42943 [Source:MGI Symbol;Acc:MGI:5663080]
Gm42607	709.74	0.450631	0.15985	2.81908	0.00481617	0.342757	599.123	820.358	1.36927	Not Sig	ENSMUSG00000106354	TEC	nonsignificant	predicted gene 42607 [Source:MGI Symbol;Acc:MGI:5662744]
Gm43169	117.601	0.915018	0.324644	2.81853	0.00482448	0.342757	81.2537	153.948	1.89465	Not Sig	ENSMUSG00000105543	TEC	nonsignificant	predicted gene 43169 [Source:MGI Symbol;Acc:MGI:5663306]
Usp43	69.4825	-0.974677	0.345894	-2.81785	0.00483469	0.34286	91.9603	47.0047	0.511141	Not Sig	ENSMUSG00000020905	protein_coding	nonsignificant	ubiquitin specific peptidase 43 [Source:MGI Symbol;Acc:MGI:2444541]
Gm45297	219.714	0.640161	0.227253	2.81695	0.00484818	0.343195	171.437	267.991	1.5632	Not Sig	ENSMUSG00000109775	TEC	nonsignificant	predicted gene 45297 [Source:MGI Symbol;Acc:MGI:5791133]
Zfhx4	2771.35	0.2635	0.0936109	2.81485	0.00488005	0.344206	2519	3023.7	1.20036	Not Sig	ENSMUSG00000025255	protein_coding	nonsignificant	zinc finger homeodomain 4 [Source:MGI Symbol;Acc:MGI:2137668]
Slc66a3	625.06	0.396286	0.140781	2.81492	0.00487892	0.344206	538.962	711.158	1.3195	Not Sig	ENSMUSG00000045679	protein_coding	nonsignificant	solute carrier family 66 member 3 [Source:MGI Symbol;Acc:MGI:2444067]
Gm16168	136.134	0.676242	0.240405	2.81293	0.00490924	0.345643	104.861	167.408	1.59648	Not Sig	ENSMUSG00000089941	lncRNA	nonsignificant	predicted gene 16168 [Source:MGI Symbol;Acc:MGI:3802010]
Ephx1	816.44	0.370644	0.131851	2.81108	0.00493751	0.34628	711.846	921.034	1.29387	Not Sig	ENSMUSG00000038776	protein_coding	nonsignificant	epoxide hydrolase 1, microsomal [Source:MGI Symbol;Acc:MGI:95405]
Kif5a	106938	-0.202479	0.0720447	-2.81047	0.00494699	0.34628	114432	99443.9	0.869019	Not Sig	ENSMUSG00000074657	protein_coding	nonsignificant	kinesin family member 5A [Source:MGI Symbol;Acc:MGI:109564]
Asap1	7145.53	-0.232074	0.0825758	-2.81043	0.00494748	0.34628	7718.95	6572.12	0.851426	Not Sig	ENSMUSG00000022377	protein_coding	nonsignificant	ArfGAP with SH3 domain, ankyrin repeat and PH domain1 [Source:MGI Symbol;Acc:MGI:1342335]
8030451O07Rik	158.392	0.66434	0.236417	2.81003	0.00495368	0.34628	122.16	194.624	1.59319	Not Sig	ENSMUSG00000116769	lncRNA	nonsignificant	RIKEN cDNA 8030451O07 gene [Source:MGI Symbol;Acc:MGI:2442215]
Gm12470	64.0962	0.882568	0.314177	2.80914	0.00496738	0.346619	45.1205	83.0718	1.84111	Not Sig	ENSMUSG00000081516	processed_pseudogene	nonsignificant	predicted gene 12470 [Source:MGI Symbol;Acc:MGI:3652113]
Gm47043	5.37963	5.04527	1.79684	2.80785	0.00498732	0.347391	0.281673	10.4776	37.1977	Not Sig	ENSMUSG00000111369	lncRNA	nonsignificant	predicted gene, 47043 [Source:MGI Symbol;Acc:MGI:6095746]
Rab3b	1572.61	-0.331378	0.118084	-2.80628	0.00501165	0.348466	1752.4	1392.82	0.794809	Not Sig	ENSMUSG00000003411	protein_coding	nonsignificant	RAB3B, member RAS oncogene family [Source:MGI Symbol;Acc:MGI:1917158]
Ifi27	791.902	0.367122	0.130849	2.8057	0.00502073	0.348478	691.023	892.78	1.29197	Not Sig	ENSMUSG00000064215	protein_coding	nonsignificant	interferon, alpha-inducible protein 27 [Source:MGI Symbol;Acc:MGI:1277180]
Gm42974	334.139	0.570057	0.203293	2.80411	0.00504558	0.348974	268.559	399.718	1.48838	Not Sig	ENSMUSG00000104963	TEC	nonsignificant	predicted gene 42974 [Source:MGI Symbol;Acc:MGI:5663111]
Hapln4	3831.99	-0.290041	0.103453	-2.8036	0.00505354	0.348974	4215.1	3448.89	0.818223	Not Sig	ENSMUSG00000007594	protein_coding	nonsignificant	hyaluronan and proteoglycan link protein 4 [Source:MGI Symbol;Acc:MGI:2679531]
Gm9930	340.525	0.57672	0.205712	2.80353	0.00505462	0.348974	273.32	407.731	1.49177	Not Sig	ENSMUSG00000053980	TEC	nonsignificant	predicted gene 9930 [Source:MGI Symbol;Acc:MGI:3642400]
Prdm6	26.5217	-1.53087	0.546957	-2.79888	0.00512796	0.353414	39.6957	13.3477	0.336251	Not Sig	ENSMUSG00000069378	protein_coding	nonsignificant	PR domain containing 6 [Source:MGI Symbol;Acc:MGI:2684938]
Ddit4l	557.998	-0.408428	0.146018	-2.79711	0.00515622	0.353426	635.707	480.289	0.75552	Not Sig	ENSMUSG00000046818	protein_coding	nonsignificant	DNA-damage-inducible transcript 4-like [Source:MGI Symbol;Acc:MGI:1920534]
Gm10277	224.755	0.579754	0.207198	2.79806	0.00514103	0.353426	179.534	269.976	1.50376	Not Sig	ENSMUSG00000069804	protein_coding	nonsignificant	predicted gene 10277 [Source:MGI Symbol;Acc:MGI:3641921]
Ptprn2	16001	-0.21013	0.0751197	-2.79727	0.00515366	0.353426	17166	14836	0.864266	Not Sig	ENSMUSG00000056553	protein_coding	nonsignificant	protein tyrosine phosphatase receptor type N polypeptide 2 [Source:MGI Symbol;Acc:MGI:107418]
Gnl1	5127.65	-0.237892	0.0850644	-2.79661	0.00516425	0.353426	5550.63	4704.66	0.84759	Not Sig	ENSMUSG00000024429	protein_coding	nonsignificant	guanine nucleotide binding protein-like 1 [Source:MGI Symbol;Acc:MGI:95764]
Zfp365	20246.6	-0.21542	0.0770558	-2.79564	0.00517971	0.353866	21755.6	18737.5	0.861271	Not Sig	ENSMUSG00000037855	protein_coding	nonsignificant	zinc finger protein 365 [Source:MGI Symbol;Acc:MGI:2143676]
Kcnj13	252.677	1.56919	0.561561	2.79434	0.00520054	0.354052	127.402	377.952	2.96661	Not Sig	ENSMUSG00000079436	protein_coding	nonsignificant	potassium inwardly-rectifying channel, subfamily J, member 13 [Source:MGI Symbol;Acc:MGI:3781032]
Gm42438	171.261	0.828319	0.296403	2.79457	0.00519687	0.354052	123.529	218.993	1.7728	Not Sig	ENSMUSG00000106356	TEC	nonsignificant	predicted gene 42438 [Source:MGI Symbol;Acc:MGI:5662575]
Gm30738	162.395	0.730137	0.261395	2.79324	0.00521836	0.354649	121.798	202.993	1.66663	Not Sig	ENSMUSG00000113456	processed_pseudogene	nonsignificant	predicted gene, 30738 [Source:MGI Symbol;Acc:MGI:5589897]
Scrt1	4585.48	-0.242018	0.0867008	-2.79141	0.00524785	0.356035	4970.38	4200.59	0.845124	Not Sig	ENSMUSG00000048385	protein_coding	nonsignificant	scratch family zinc finger 1 [Source:MGI Symbol;Acc:MGI:2176606]
Gm44681	230.326	0.614623	0.220367	2.78909	0.00528567	0.356645	181.619	279.032	1.53636	Not Sig	ENSMUSG00000109256	TEC	nonsignificant	predicted gene 44681 [Source:MGI Symbol;Acc:MGI:5753257]
Gm26688	3.09115	5.24087	1.87878	2.78952	0.0052787	0.356645	0	6.18231	Inf	Not Sig	ENSMUSG00000097752	lncRNA	nonsignificant	predicted gene, 26688 [Source:MGI Symbol;Acc:MGI:5477182]
Dab2	997.078	0.449563	0.161144	2.78982	0.00527376	0.356645	842.592	1151.57	1.36669	Not Sig	ENSMUSG00000022150	protein_coding	nonsignificant	disabled 2, mitogen-responsive phosphoprotein [Source:MGI Symbol;Acc:MGI:109175]
Adamts10	850.748	0.369094	0.132357	2.78862	0.00529328	0.356645	742.149	959.346	1.29266	Not Sig	ENSMUSG00000024299	protein_coding	nonsignificant	ADAM metallopeptidase with thrombospondin type 1 motif 10 [Source:MGI Symbol;Acc:MGI:2449112]
Gm47026	167.035	0.811429	0.291061	2.78783	0.00530627	0.356906	121.313	212.757	1.75378	Not Sig	ENSMUSG00000112106	TEC	nonsignificant	predicted gene, 47026 [Source:MGI Symbol;Acc:MGI:6095717]
Pop4	717.001	-0.421761	0.151386	-2.78601	0.00533619	0.358303	820.015	613.988	0.748752	Not Sig	ENSMUSG00000030423	protein_coding	nonsignificant	processing of precursor 4, ribonuclease P/MRP family, (S. cerevisiae) [Source:MGI Symbol;Acc:MGI:1913411]
Gm10167	89.0412	0.816361	0.293335	2.78303	0.00538538	0.360369	64.5249	113.557	1.7599	Not Sig	ENSMUSG00000066554	processed_pseudogene	nonsignificant	predicted pseudogene 10167 [Source:MGI Symbol;Acc:MGI:3704263]
1700015H07Rik	65.1617	1.03711	0.37263	2.78322	0.00538219	0.360369	42.5031	87.8203	2.06621	Not Sig	ENSMUSG00000115761	lncRNA	nonsignificant	RIKEN cDNA 1700015H07 gene [Source:MGI Symbol;Acc:MGI:1922777]
Nrsn1	13610.9	-0.179224	0.0644478	-2.78092	0.00542055	0.362104	14455.6	12766.3	0.883138	Not Sig	ENSMUSG00000048978	protein_coding	nonsignificant	neurensin 1 [Source:MGI Symbol;Acc:MGI:894662]
A630081D01Rik	414.882	0.562844	0.202551	2.77877	0.00545647	0.363644	334.366	495.399	1.48161	Not Sig	ENSMUSG00000102721	TEC	nonsignificant	RIKEN cDNA A630081D01 gene [Source:MGI Symbol;Acc:MGI:2138649]
Garnl3	2736.33	-0.273389	0.0984162	-2.77788	0.00547148	0.363644	2995.36	2477.29	0.827041	Not Sig	ENSMUSG00000038860	protein_coding	nonsignificant	GTPase activating RANGAP domain-like 3 [Source:MGI Symbol;Acc:MGI:2139309]
Slc4a5	370.137	3.08547	1.11064	2.7781	0.00546779	0.363644	78.0762	662.198	8.48143	Not Sig	ENSMUSG00000068323	protein_coding	nonsignificant	solute carrier family 4, sodium bicarbonate cotransporter, member 5 [Source:MGI Symbol;Acc:MGI:2443220]
Lepr	365.805	0.625001	0.225042	2.77726	0.00548195	0.363692	287.605	444.004	1.5438	Not Sig	ENSMUSG00000057722	protein_coding	nonsignificant	leptin receptor [Source:MGI Symbol;Acc:MGI:104993]
Gm43877	118.558	0.834647	0.300586	2.77674	0.00549078	0.363692	84.9819	152.135	1.79021	Not Sig	ENSMUSG00000107571	TEC	nonsignificant	predicted gene, 43877 [Source:MGI Symbol;Acc:MGI:5690269]
Bbln	1570.33	-0.26988	0.0974021	-2.77078	0.00559215	0.365809	1717.47	1423.19	0.828658	Not Sig	ENSMUSG00000039195	protein_coding	nonsignificant	bublin coiled coil protein [Source:MGI Symbol;Acc:MGI:1920987]
Rusc1	3181.15	-0.219896	0.0793577	-2.77095	0.00558928	0.365809	3424.13	2938.18	0.858079	Not Sig	ENSMUSG00000041263	protein_coding	nonsignificant	RUN and SH3 domain containing 1 [Source:MGI Symbol;Acc:MGI:1919546]
Fam47e	16.7674	1.81284	0.653459	2.77422	0.00553347	0.365809	7.52579	26.009	3.45598	Not Sig	ENSMUSG00000057068	protein_coding	nonsignificant	family with sequence similarity 47, member E [Source:MGI Symbol;Acc:MGI:2686227]
Pdzrn3	756.544	-0.352231	0.127111	-2.77105	0.00558766	0.365809	848.1	664.988	0.784091	Not Sig	ENSMUSG00000035357	protein_coding	nonsignificant	PDZ domain containing RING finger 3 [Source:MGI Symbol;Acc:MGI:1933157]
Spint2	577.523	0.534882	0.193065	2.77047	0.00559749	0.365809	471.275	683.771	1.4509	Not Sig	ENSMUSG00000074227	protein_coding	nonsignificant	serine protease inhibitor, Kunitz type 2 [Source:MGI Symbol;Acc:MGI:1338031]
Mybpc1	121.344	-0.785155	0.283254	-2.77191	0.00557281	0.365809	153.491	89.1957	0.581112	Not Sig	ENSMUSG00000020061	protein_coding	nonsignificant	myosin binding protein C, slow-type [Source:MGI Symbol;Acc:MGI:1336213]
Abhd12b	6.87543	-3.40198	1.22687	-2.77288	0.00555625	0.365809	12.4603	1.2906	0.103577	Not Sig	ENSMUSG00000090121	protein_coding	nonsignificant	abhydrolase domain containing 12B [Source:MGI Symbol;Acc:MGI:2685650]
Nrg3os	567.012	0.543527	0.19615	2.77097	0.00558889	0.365809	460.598	673.426	1.46207	Not Sig	ENSMUSG00000093528	lncRNA	nonsignificant	neuregulin 3, opposite strand [Source:MGI Symbol;Acc:MGI:1922420]
Cntnap5c	1816.34	0.326326	0.117907	2.76767	0.00564594	0.367747	1611.05	2021.62	1.25485	Not Sig	ENSMUSG00000038048	protein_coding	nonsignificant	contactin associated protein-like 5C [Source:MGI Symbol;Acc:MGI:3646013]
Cndp1	29.1875	1.6585	0.59916	2.76805	0.00563935	0.367747	13.926	44.4489	3.19179	Not Sig	ENSMUSG00000056162	protein_coding	nonsignificant	carnosine dipeptidase 1 [Source:MGI Symbol;Acc:MGI:2451097]
Gm14275	2.92381	5.16758	1.87062	2.7625	0.00573614	0.370733	0	5.84762	Inf	Not Sig	ENSMUSG00000085949	lncRNA	nonsignificant	predicted gene 14275 [Source:MGI Symbol;Acc:MGI:3649537]
Prxl2b	959.309	-0.293	0.106023	-2.76354	0.00571788	0.370733	1057.22	861.398	0.814775	Not Sig	ENSMUSG00000029059	protein_coding	nonsignificant	peroxiredoxin like 2B [Source:MGI Symbol;Acc:MGI:1913719]
Ppfibp2	663.009	0.438701	0.158872	2.76134	0.00575643	0.370733	562.6	763.418	1.35695	Not Sig	ENSMUSG00000036528	protein_coding	nonsignificant	PTPRF interacting protein, binding protein 2 (liprin beta 2) [Source:MGI Symbol;Acc:MGI:894649]
Muc5b	111.309	0.675914	0.244833	2.76071	0.00576755	0.370733	85.4802	137.138	1.60432	Not Sig	ENSMUSG00000066108	protein_coding	nonsignificant	mucin 5, subtype B, tracheobronchial [Source:MGI Symbol;Acc:MGI:1921430]
Gm36962	61.9305	0.949981	0.343647	2.7644	0.00570268	0.370733	42.2311	81.6299	1.93293	Not Sig	ENSMUSG00000103931	TEC	nonsignificant	predicted gene, 36962 [Source:MGI Symbol;Acc:MGI:5610190]
Tns4	20.4511	1.58301	0.573334	2.76106	0.00576144	0.370733	10.2678	30.6345	2.98356	Not Sig	ENSMUSG00000017607	protein_coding	nonsignificant	tensin 4 [Source:MGI Symbol;Acc:MGI:2144377]
Gm48442	44.8864	1.21583	0.44032	2.76124	0.00575824	0.370733	26.9099	62.8629	2.33605	Not Sig	ENSMUSG00000114749	TEC	nonsignificant	predicted gene, 48442 [Source:MGI Symbol;Acc:MGI:6097951]
Magt1	1482.6	-0.251907	0.0911737	-2.76293	0.00572845	0.370733	1612.67	1352.53	0.838691	Not Sig	ENSMUSG00000031232	protein_coding	nonsignificant	magnesium transporter 1 [Source:MGI Symbol;Acc:MGI:1914325]
Fam81a	8130.17	-0.201225	0.0729336	-2.75902	0.00579751	0.371565	8697.45	7562.89	0.869552	Not Sig	ENSMUSG00000032224	protein_coding	nonsignificant	family with sequence similarity 81, member A [Source:MGI Symbol;Acc:MGI:1924136]
Gm9625	52.6943	-1.28962	0.467439	-2.75891	0.00579947	0.371565	74.8457	30.5429	0.408078	Not Sig	ENSMUSG00000097906	processed_pseudogene	nonsignificant	predicted gene 9625 [Source:MGI Symbol;Acc:MGI:3780033]
Hspg2	1121.45	0.440312	0.159808	2.75526	0.00586463	0.372085	951.422	1291.48	1.35743	Not Sig	ENSMUSG00000028763	protein_coding	nonsignificant	perlecan (heparan sulfate proteoglycan 2) [Source:MGI Symbol;Acc:MGI:96257]
Gm42992	1201.11	0.833048	0.302307	2.75563	0.00585785	0.372085	863.618	1538.61	1.78159	Not Sig	ENSMUSG00000106320	TEC	nonsignificant	predicted gene 42992 [Source:MGI Symbol;Acc:MGI:5663129]
Cadm4	5385.52	-0.218691	0.079303	-2.75766	0.00582167	0.372085	5793.71	4977.33	0.859092	Not Sig	ENSMUSG00000054793	protein_coding	nonsignificant	cell adhesion molecule 4 [Source:MGI Symbol;Acc:MGI:2449088]
Gm44664	130.009	0.653917	0.237227	2.75651	0.00584222	0.372085	100.949	159.068	1.57572	Not Sig	ENSMUSG00000108522	TEC	nonsignificant	predicted gene 44664 [Source:MGI Symbol;Acc:MGI:5753240]
Gm49328	23.9925	1.68309	0.610728	2.75587	0.00585356	0.372085	11.2832	36.7019	3.25279	Not Sig	ENSMUSG00000113416	transcribed_unprocessed_pseudogene	nonsignificant	predicted gene, 49328 [Source:MGI Symbol;Acc:MGI:6121513]
Irf2bpl	3145.69	-0.242555	0.0879728	-2.75717	0.00583048	0.372085	3410.4	2880.98	0.844764	Not Sig	ENSMUSG00000034168	protein_coding	nonsignificant	interferon regulatory factor 2 binding protein-like [Source:MGI Symbol;Acc:MGI:2442463]
Gm37463	252.806	0.562032	0.204093	2.75381	0.00589057	0.373127	203.653	301.96	1.48272	Not Sig	ENSMUSG00000102427	TEC	nonsignificant	predicted gene, 37463 [Source:MGI Symbol;Acc:MGI:5610691]
Kif1a	80672.1	-0.178856	0.0649956	-2.75181	0.00592664	0.373675	85667.6	75676.6	0.883374	Not Sig	ENSMUSG00000014602	protein_coding	nonsignificant	kinesin family member 1A [Source:MGI Symbol;Acc:MGI:108391]
Dnah2	432.327	0.489919	0.178039	2.75174	0.00592787	0.373675	359.369	505.285	1.40603	Not Sig	ENSMUSG00000005237	protein_coding	nonsignificant	dynein, axonemal, heavy chain 2 [Source:MGI Symbol;Acc:MGI:107731]
Gm49071	160.048	0.682107	0.2478	2.75265	0.00591147	0.373675	122.608	197.488	1.61073	Not Sig	ENSMUSG00000115191	processed_pseudogene	nonsignificant	predicted gene, 49071 [Source:MGI Symbol;Acc:MGI:6118455]
Slc4a3	4754.92	-0.213216	0.077593	-2.74788	0.00599826	0.376989	5107.4	4402.44	0.861973	Not Sig	ENSMUSG00000006576	protein_coding	nonsignificant	solute carrier family 4 (anion exchanger), member 3 [Source:MGI Symbol;Acc:MGI:109350]
Tyro3	4839.46	-0.265676	0.0966869	-2.7478	0.00599969	0.376989	5285.36	4393.57	0.831271	Not Sig	ENSMUSG00000027298	protein_coding	nonsignificant	TYRO3 protein tyrosine kinase 3 [Source:MGI Symbol;Acc:MGI:104294]
Atp1a2	45988.3	-0.171098	0.0623615	-2.74366	0.00607593	0.378093	48711.9	43264.7	0.888175	Not Sig	ENSMUSG00000007097	protein_coding	nonsignificant	ATPase, Na+/K+ transporting, alpha 2 polypeptide [Source:MGI Symbol;Acc:MGI:88106]
1700034H15Rik	230.968	-0.606783	0.220973	-2.74596	0.00603338	0.378093	278.893	183.044	0.656324	Not Sig	ENSMUSG00000055833	lncRNA	nonsignificant	RIKEN cDNA 1700034H15 gene [Source:MGI Symbol;Acc:MGI:1921515]
Gm23527	4.01182	4.60872	1.67857	2.74562	0.0060396	0.378093	0.281673	7.74196	27.4856	Not Sig	ENSMUSG00000077758	snoRNA	nonsignificant	predicted gene, 23527 [Source:MGI Symbol;Acc:MGI:5453304]
4833421K07Rik	84.4765	0.855449	0.311737	2.74414	0.00606706	0.378093	60.0202	108.933	1.81493	Not Sig	ENSMUSG00000108519	TEC	nonsignificant	RIKEN cDNA 4833421K07 gene [Source:MGI Symbol;Acc:MGI:1921844]
Gm38091	131.26	0.759982	0.276891	2.7447	0.0060567	0.378093	97.8438	164.675	1.68304	Not Sig	ENSMUSG00000103247	TEC	nonsignificant	predicted gene, 38091 [Source:MGI Symbol;Acc:MGI:5611319]
Ankrd34b	1443.52	-0.260913	0.0950767	-2.74423	0.00606527	0.378093	1573.91	1313.14	0.834319	Not Sig	ENSMUSG00000045034	protein_coding	nonsignificant	ankyrin repeat domain 34B [Source:MGI Symbol;Acc:MGI:2443245]
Brwd3	3921.33	0.24453	0.0891415	2.74317	0.00608488	0.378093	3588.1	4254.56	1.18574	Not Sig	ENSMUSG00000063663	protein_coding	nonsignificant	bromodomain and WD repeat domain containing 3 [Source:MGI Symbol;Acc:MGI:3029414]
Hecw2	4525.58	-0.231853	0.0846058	-2.74039	0.00613661	0.379751	4886.99	4164.17	0.852094	Not Sig	ENSMUSG00000042807	protein_coding	nonsignificant	HECT, C2 and WW domain containing E3 ubiquitin protein ligase 2 [Source:MGI Symbol;Acc:MGI:2685817]
Gm26638	135.864	0.858097	0.313137	2.74033	0.00613782	0.379751	96.6071	175.121	1.81272	Not Sig	ENSMUSG00000097563	lncRNA	nonsignificant	predicted gene, 26638 [Source:MGI Symbol;Acc:MGI:5477132]
Tubb3	7399.89	-0.226536	0.0826866	-2.73969	0.00614972	0.379751	7981.09	6818.68	0.854354	Not Sig	ENSMUSG00000062380	protein_coding	nonsignificant	tubulin, beta 3 class III [Source:MGI Symbol;Acc:MGI:107813]
Gm20149	176.512	0.570422	0.208226	2.73943	0.00615458	0.379751	141.974	211.05	1.48654	Not Sig	ENSMUSG00000111227	lncRNA	nonsignificant	predicted gene, 20149 [Source:MGI Symbol;Acc:MGI:5012334]
Prepl	23409.9	-0.169131	0.0617462	-2.73914	0.00616006	0.379751	24780.6	22039.2	0.889374	Not Sig	ENSMUSG00000024127	protein_coding	nonsignificant	prolyl endopeptidase-like [Source:MGI Symbol;Acc:MGI:2441932]
Tox2	1137.7	-0.276196	0.100861	-2.7384	0.00617398	0.38001	1246.08	1029.33	0.826056	Not Sig	ENSMUSG00000074607	protein_coding	nonsignificant	TOX high mobility group box family member 2 [Source:MGI Symbol;Acc:MGI:3611233]
Rbm8a	2265.15	-0.260667	0.0952083	-2.73786	0.00618412	0.380037	2467.74	2062.55	0.835805	Not Sig	ENSMUSG00000038374	protein_coding	nonsignificant	RNA binding motif protein 8a [Source:MGI Symbol;Acc:MGI:1913129]
Fnbp1l	4675.59	-0.230722	0.0843405	-2.7356	0.00622673	0.381041	5049.3	4301.89	0.851976	Not Sig	ENSMUSG00000039735	protein_coding	nonsignificant	formin binding protein 1-like [Source:MGI Symbol;Acc:MGI:1925642]
Pitpnm3	2672.61	-0.239397	0.0875168	-2.73544	0.00622966	0.381041	2895.16	2450.06	0.846261	Not Sig	ENSMUSG00000040543	protein_coding	nonsignificant	PITPNM family member 3 [Source:MGI Symbol;Acc:MGI:2685726]
Apex2	1315.2	0.365712	0.13365	2.73634	0.00621263	0.381041	1149.13	1481.27	1.28904	Not Sig	ENSMUSG00000025269	protein_coding	nonsignificant	apurinic/apyrimidinic endonuclease 2 [Source:MGI Symbol;Acc:MGI:1924872]
Fdft1	3580.58	-0.212316	0.077664	-2.73378	0.0062612	0.382373	3844.01	3317.15	0.862938	Not Sig	ENSMUSG00000021273	protein_coding	nonsignificant	farnesyl diphosphate farnesyl transferase 1 [Source:MGI Symbol;Acc:MGI:102706]
Gm47121	68.6432	0.954316	0.349302	2.73207	0.0062938	0.382945	46.5855	90.7009	1.94698	Not Sig	ENSMUSG00000111434	lncRNA	nonsignificant	predicted gene, 47121 [Source:MGI Symbol;Acc:MGI:6095868]
Gm49329	60.5517	0.942112	0.34487	2.73179	0.00629916	0.382945	41.4248	79.6786	1.92345	Not Sig	ENSMUSG00000113642	transcribed_unprocessed_pseudogene	nonsignificant	predicted gene, 49329 [Source:MGI Symbol;Acc:MGI:6121514]
Gm26672	229.38	0.587681	0.21513	2.73175	0.00629992	0.382945	183.085	275.674	1.50571	Not Sig	ENSMUSG00000097330	lncRNA	nonsignificant	predicted gene, 26672 [Source:MGI Symbol;Acc:MGI:5477166]
Ldb2	2546.23	-0.267847	0.0980762	-2.73101	0.00631403	0.383208	2783.89	2308.58	0.829267	Not Sig	ENSMUSG00000039706	protein_coding	nonsignificant	LIM domain binding 2 [Source:MGI Symbol;Acc:MGI:894670]
Nipal3	4564.24	-0.216452	0.0793042	-2.72939	0.00634519	0.384503	4907.45	4221.02	0.860125	Not Sig	ENSMUSG00000028803	protein_coding	nonsignificant	NIPA-like domain containing 3 [Source:MGI Symbol;Acc:MGI:1921802]
Gm37633	149.384	0.651168	0.238708	2.72788	0.00637427	0.385529	116.024	182.743	1.57504	Not Sig	ENSMUSG00000102868	TEC	nonsignificant	predicted gene, 37633 [Source:MGI Symbol;Acc:MGI:5610861]
	627.977	0.353357	0.129554	2.72749	0.00638182	0.385529	551.163	704.79	1.27873	Not Sig	ENSMUSG00000103428		nonsignificant
Ap1s2	2565.6	0.216642	0.079489	2.72543	0.00642173	0.387342	2373.61	2757.59	1.16177	Not Sig	ENSMUSG00000031367	protein_coding	nonsignificant	adaptor-related protein complex 1, sigma 2 subunit [Source:MGI Symbol;Acc:MGI:1889383]
Gm37423	233.889	0.566066	0.207881	2.72303	0.00646868	0.387999	188.061	279.717	1.48738	Not Sig	ENSMUSG00000104436	lncRNA	nonsignificant	predicted gene, 37423 [Source:MGI Symbol;Acc:MGI:5610651]
Gm13361	66.6375	0.90662	0.332854	2.72377	0.00645405	0.387999	46.2743	87.0007	1.88011	Not Sig	ENSMUSG00000083777	processed_pseudogene	nonsignificant	predicted gene 13361 [Source:MGI Symbol;Acc:MGI:3651169]
Sox1	1079.64	-0.280809	0.1031	-2.72367	0.00645608	0.387999	1183.5	975.775	0.824484	Not Sig	ENSMUSG00000096014	protein_coding	nonsignificant	SRY (sex determining region Y)-box 1 [Source:MGI Symbol;Acc:MGI:98357]
Gm48928	106.929	0.734145	0.269625	2.72284	0.00647226	0.387999	79.8972	133.962	1.67668	Not Sig	ENSMUSG00000113080	processed_pseudogene	nonsignificant	predicted gene, 48928 [Source:MGI Symbol;Acc:MGI:6118242]
Gm11960	249.21	0.537978	0.197824	2.71948	0.00653853	0.391372	202.539	295.881	1.46086	Not Sig	ENSMUSG00000081974	transcribed_processed_pseudogene	nonsignificant	predicted gene 11960 [Source:MGI Symbol;Acc:MGI:3652301]
Gm38085	595.303	0.954655	0.351349	2.71712	0.00658531	0.39357	405.154	785.451	1.93865	Not Sig	ENSMUSG00000102517	lncRNA	nonsignificant	predicted gene, 38085 [Source:MGI Symbol;Acc:MGI:5611313]
Sgcz	220.43	-0.577256	0.212519	-2.71626	0.00660245	0.393993	264.567	176.293	0.666345	Not Sig	ENSMUSG00000039539	protein_coding	nonsignificant	sarcoglycan zeta [Source:MGI Symbol;Acc:MGI:2388820]
Gm43872	753.927	0.515581	0.189865	2.71552	0.00661719	0.394086	619.886	887.968	1.43247	Not Sig	ENSMUSG00000108070	TEC	nonsignificant	predicted gene, 43872 [Source:MGI Symbol;Acc:MGI:5690264]
Nap1l2	4941.01	-0.209853	0.077289	-2.71517	0.00662415	0.394086	5300.74	4581.27	0.864271	Not Sig	ENSMUSG00000082229	protein_coding	nonsignificant	nucleosome assembly protein 1-like 2 [Source:MGI Symbol;Acc:MGI:106654]
Gm13543	158.706	0.735198	0.270845	2.71446	0.00663836	0.394311	119.293	198.12	1.66079	Not Sig	ENSMUSG00000083745	processed_pseudogene	nonsignificant	predicted gene 13543 [Source:MGI Symbol;Acc:MGI:3649448]
Gm37728	476.08	0.484624	0.178566	2.71398	0.00664807	0.394311	396.594	555.566	1.40084	Not Sig	ENSMUSG00000103220	TEC	nonsignificant	predicted gene, 37728 [Source:MGI Symbol;Acc:MGI:5610956]
Trpv4	139.847	2.1276	0.784378	2.71247	0.00667846	0.394917	52.1002	227.593	4.36838	Not Sig	ENSMUSG00000014158	protein_coding	nonsignificant	transient receptor potential cation channel, subfamily V, member 4 [Source:MGI Symbol;Acc:MGI:1926945]
Ank1	3331.84	-0.219029	0.080742	-2.7127	0.00667376	0.394917	3585.04	3078.65	0.85875	Not Sig	ENSMUSG00000031543	protein_coding	nonsignificant	ankyrin 1, erythroid [Source:MGI Symbol;Acc:MGI:88024]
Gm19667	497.154	0.40188	0.148196	2.71181	0.00669163	0.395099	428.138	566.17	1.3224	Not Sig	ENSMUSG00000099373	lncRNA	nonsignificant	predicted gene, 19667 [Source:MGI Symbol;Acc:MGI:5011852]
Npas2	1940.69	-0.248338	0.0916485	-2.70967	0.00673492	0.396547	2107.54	1773.84	0.841666	Not Sig	ENSMUSG00000026077	protein_coding	nonsignificant	neuronal PAS domain protein 2 [Source:MGI Symbol;Acc:MGI:109232]
Gm21846	104.371	0.947915	0.349856	2.70944	0.00673966	0.396547	71.326	137.416	1.92659	Not Sig	ENSMUSG00000094832	TEC	nonsignificant	predicted gene, 21846 [Source:MGI Symbol;Acc:MGI:5434010]
Runx2	971.019	0.270484	0.0998427	2.7091	0.00674654	0.396547	879.77	1062.27	1.20744	Not Sig	ENSMUSG00000039153	protein_coding	nonsignificant	runt related transcription factor 2 [Source:MGI Symbol;Acc:MGI:99829]
Ppp3r2	86.5153	0.823102	0.30417	2.70606	0.00680869	0.3996	62.8211	110.209	1.75434	Not Sig	ENSMUSG00000028310	protein_coding	nonsignificant	protein phosphatase 3, regulatory subunit B, alpha isoform (calcineurin B, type II) [Source:MGI Symbol;Acc:MGI:107171]
Zwint	25909.4	-0.207134	0.0765865	-2.70458	0.00683918	0.400788	27767.6	24051.1	0.866157	Not Sig	ENSMUSG00000019923	protein_coding	nonsignificant	ZW10 interactor [Source:MGI Symbol;Acc:MGI:1289227]
Thrb	4123.72	-0.200602	0.0742063	-2.7033	0.00686557	0.401734	4409.76	3837.68	0.870269	Not Sig	ENSMUSG00000021779	protein_coding	nonsignificant	thyroid hormone receptor beta [Source:MGI Symbol;Acc:MGI:98743]
Gm38243	243.106	0.703596	0.260458	2.70138	0.0069053	0.402395	184.625	301.586	1.6335	Not Sig	ENSMUSG00000103748	TEC	nonsignificant	predicted gene, 38243 [Source:MGI Symbol;Acc:MGI:5611471]
Gm15624	897.299	0.329825	0.122062	2.70212	0.00688983	0.402395	794.439	1000.16	1.25895	Not Sig	ENSMUSG00000085782	lncRNA	nonsignificant	predicted gene 15624 [Source:MGI Symbol;Acc:MGI:3783068]
Oca2	58.7603	1.30923	0.484674	2.70126	0.00690772	0.402395	33.7037	83.8169	2.48687	Not Sig	ENSMUSG00000030450	protein_coding	nonsignificant	oculocutaneous albinism II [Source:MGI Symbol;Acc:MGI:97454]
Kcnb1	15055.3	-0.1817	0.0672888	-2.7003	0.0069277	0.402959	16003.1	14107.5	0.881548	Not Sig	ENSMUSG00000050556	protein_coding	nonsignificant	potassium voltage gated channel, Shab-related subfamily, member 1 [Source:MGI Symbol;Acc:MGI:96666]
Arl8a	7726.12	-0.18637	0.0690916	-2.69743	0.00698769	0.405846	8224.27	7227.98	0.87886	Not Sig	ENSMUSG00000026426	protein_coding	nonsignificant	ADP-ribosylation factor-like 8A [Source:MGI Symbol;Acc:MGI:1915974]
Prkacb	20463.2	-0.177262	0.065759	-2.69563	0.00702566	0.407447	21719.9	19206.4	0.884273	Not Sig	ENSMUSG00000005034	protein_coding	nonsignificant	protein kinase, cAMP dependent, catalytic, beta [Source:MGI Symbol;Acc:MGI:97594]
Klf10	1868.1	-0.349311	0.129611	-2.69508	0.00703718	0.407511	2092.99	1643.22	0.785107	Not Sig	ENSMUSG00000037465	protein_coding	nonsignificant	Kruppel-like transcription factor 10 [Source:MGI Symbol;Acc:MGI:1101353]
Stx1b	26012.5	-0.194823	0.0723325	-2.69344	0.00707189	0.408916	27766.2	24258.8	0.87368	Not Sig	ENSMUSG00000030806	protein_coding	nonsignificant	syntaxin 1B [Source:MGI Symbol;Acc:MGI:1930705]
Ints7	1541.76	0.35224	0.130911	2.6907	0.00713032	0.411687	1354.26	1729.26	1.2769	Not Sig	ENSMUSG00000037461	protein_coding	nonsignificant	integrator complex subunit 7 [Source:MGI Symbol;Acc:MGI:1924315]
Gm42441	90.8682	0.938767	0.349096	2.68914	0.00716374	0.412399	62.4854	119.251	1.90846	Not Sig	ENSMUSG00000106516	TEC	nonsignificant	predicted gene 42441 [Source:MGI Symbol;Acc:MGI:5662578]
Vwa3a	686.31	0.423617	0.157505	2.68955	0.00715479	0.412399	586.101	786.52	1.34195	Not Sig	ENSMUSG00000030889	protein_coding	nonsignificant	von Willebrand factor A domain containing 3A [Source:MGI Symbol;Acc:MGI:3041229]
Cds1	4048.55	-0.220037	0.0819004	-2.68664	0.0072175	0.412461	4357.24	3739.86	0.85831	Not Sig	ENSMUSG00000029330	protein_coding	nonsignificant	CDP-diacylglycerol synthase 1 [Source:MGI Symbol;Acc:MGI:1921846]
Ccdc92	2525.19	-0.252409	0.0939253	-2.68734	0.00720243	0.412461	2747.47	2302.9	0.838191	Not Sig	ENSMUSG00000037979	protein_coding	nonsignificant	coiled-coil domain containing 92 [Source:MGI Symbol;Acc:MGI:106485]
Gm43483	156.097	0.828844	0.308383	2.68771	0.00719428	0.412461	112.455	199.738	1.77617	Not Sig	ENSMUSG00000105289	TEC	nonsignificant	predicted gene 43483 [Source:MGI Symbol;Acc:MGI:5663620]
Gm48766	231.691	0.639713	0.238005	2.68781	0.00719223	0.412461	180.84	282.542	1.56238	Not Sig	ENSMUSG00000114617	TEC	nonsignificant	predicted gene, 48766 [Source:MGI Symbol;Acc:MGI:6098453]
Osbpl1a	8032.18	-0.183991	0.0684743	-2.68701	0.00720942	0.412461	8544.33	7520.03	0.880119	Not Sig	ENSMUSG00000044252	protein_coding	nonsignificant	oxysterol binding protein-like 1A [Source:MGI Symbol;Acc:MGI:1927551]
Lbh	2008.53	-0.232224	0.0864544	-2.68608	0.00722952	0.412546	2171.2	1845.86	0.850159	Not Sig	ENSMUSG00000024063	protein_coding	nonsignificant	limb-bud and heart [Source:MGI Symbol;Acc:MGI:1925139]
Gm42447	343.728	0.492032	0.183326	2.68391	0.00727662	0.41463	285.092	402.363	1.41134	Not Sig	ENSMUSG00000105485	TEC	nonsignificant	predicted gene 42447 [Source:MGI Symbol;Acc:MGI:5662584]
Scrn1	10710.5	-0.184732	0.0688992	-2.6812	0.0073359	0.416794	11395.1	10026	0.879855	Not Sig	ENSMUSG00000019124	protein_coding	nonsignificant	secernin 1 [Source:MGI Symbol;Acc:MGI:1917188]
Cep112it	132.157	0.635081	0.23686	2.68125	0.00733472	0.416794	103.313	161.001	1.55838	Not Sig	ENSMUSG00000085811	lncRNA	nonsignificant	centrosomal protein 112, intronic transcript [Source:MGI Symbol;Acc:MGI:3649867]
Cfl2	3887.65	-0.229755	0.0857069	-2.68071	0.00734662	0.416798	4195.62	3579.69	0.853198	Not Sig	ENSMUSG00000062929	protein_coding	nonsignificant	cofilin 2, muscle [Source:MGI Symbol;Acc:MGI:101763]
Gm14415	91.0072	0.945285	0.352818	2.67925	0.00737882	0.417415	61.8533	120.161	1.94268	Not Sig	ENSMUSG00000082377	transcribed_unprocessed_pseudogene	nonsignificant	predicted gene 14415 [Source:MGI Symbol;Acc:MGI:3652252]
Mrpl10	1637.69	-0.248481	0.0927405	-2.67932	0.00737715	0.417415	1779.4	1495.98	0.840723	Not Sig	ENSMUSG00000001445	protein_coding	nonsignificant	mitochondrial ribosomal protein L10 [Source:MGI Symbol;Acc:MGI:1333801]
Gm48586	131.094	0.652529	0.243612	2.67856	0.00739396	0.417668	101.611	160.578	1.58032	Not Sig	ENSMUSG00000113195	TEC	nonsignificant	predicted gene, 48586 [Source:MGI Symbol;Acc:MGI:6098157]
Gm37677	847.773	0.380634	0.14248	2.6715	0.0075514	0.421808	736.085	959.461	1.30346	Not Sig	ENSMUSG00000103976	TEC	nonsignificant	predicted gene, 37677 [Source:MGI Symbol;Acc:MGI:5610905]
Platr4	2.79212	5.10922	1.91162	2.67272	0.00752398	0.421808	0	5.58425	Inf	Not Sig	ENSMUSG00000097639	lncRNA	nonsignificant	pluripotency associated transcript 4 [Source:MGI Symbol;Acc:MGI:1925956]
Glrb	11142.5	-0.179047	0.0670125	-2.67184	0.00754368	0.421808	11833.8	10451.1	0.883157	Not Sig	ENSMUSG00000028020	protein_coding	nonsignificant	glycine receptor, beta subunit [Source:MGI Symbol;Acc:MGI:95751]
Frem1	753.756	0.984621	0.368438	2.67242	0.00753064	0.421808	506.014	1001.5	1.97919	Not Sig	ENSMUSG00000059049	protein_coding	nonsignificant	Fras1 related extracellular matrix protein 1 [Source:MGI Symbol;Acc:MGI:2670972]
Neto2	5097.79	-0.217151	0.0812872	-2.6714	0.00755345	0.421808	5481.77	4713.81	0.859907	Not Sig	ENSMUSG00000036902	protein_coding	nonsignificant	neuropilin (NRP) and tolloid (TLL)-like 2 [Source:MGI Symbol;Acc:MGI:1921763]
R3hdm2	10208.6	-0.177316	0.0663452	-2.67263	0.00752596	0.421808	10835.6	9581.55	0.884269	Not Sig	ENSMUSG00000025404	protein_coding	nonsignificant	R3H domain containing 2 [Source:MGI Symbol;Acc:MGI:1919000]
Rreb1	4738.28	0.237601	0.088871	2.67355	0.00750539	0.421808	4349.49	5127.07	1.17877	Not Sig	ENSMUSG00000039087	protein_coding	nonsignificant	ras responsive element binding protein 1 [Source:MGI Symbol;Acc:MGI:2443664]
Gm15609	209.696	0.518856	0.194061	2.67367	0.00750266	0.421808	172.242	247.149	1.4349	Not Sig	ENSMUSG00000086602	lncRNA	nonsignificant	predicted gene 15609 [Source:MGI Symbol;Acc:MGI:3783055]
Ppp2r2cos	382.026	0.441974	0.165503	2.6705	0.00757386	0.422345	323.092	440.961	1.36482	Not Sig	ENSMUSG00000087487	lncRNA	nonsignificant	protein phosphatase 2, regulatory subunit B, gamma, opposite strand [Source:MGI Symbol;Acc:MGI:1918304]
Nr1d1	3965.58	-0.251626	0.0943118	-2.66803	0.00762981	0.424452	4310.41	3620.76	0.840003	Not Sig	ENSMUSG00000020889	protein_coding	nonsignificant	nuclear receptor subfamily 1, group D, member 1 [Source:MGI Symbol;Acc:MGI:2444210]
Prkar2b	2596.95	-0.203993	0.0764627	-2.66787	0.00763333	0.424452	2779.9	2414.01	0.86838	Not Sig	ENSMUSG00000002997	protein_coding	nonsignificant	protein kinase, cAMP dependent regulatory, type II beta [Source:MGI Symbol;Acc:MGI:97760]
Gm38148	722.539	0.48466	0.18201	2.66282	0.00774889	0.427996	601.57	843.508	1.40218	Not Sig	ENSMUSG00000103161	TEC	nonsignificant	predicted gene, 38148 [Source:MGI Symbol;Acc:MGI:5611376]
Gm26814	305.241	0.561361	0.210752	2.66361	0.00773063	0.427996	246.679	363.804	1.47481	Not Sig	ENSMUSG00000097385	TEC	nonsignificant	predicted gene, 26814 [Source:MGI Symbol;Acc:MGI:5477308]
Hbb-bs	4083.22	0.970574	0.364445	2.66315	0.00774119	0.427996	2759.04	5407.4	1.95989	Not Sig	ENSMUSG00000052305	protein_coding	nonsignificant	hemoglobin, beta adult s chain [Source:MGI Symbol;Acc:MGI:5474852]
Camk2n2	1317.21	-0.274365	0.10304	-2.6627	0.00775173	0.427996	1442.95	1191.46	0.825715	Not Sig	ENSMUSG00000051146	protein_coding	nonsignificant	calcium/calmodulin-dependent protein kinase II inhibitor 2 [Source:MGI Symbol;Acc:MGI:1920297]
Gm49839	253.697	0.505907	0.18988	2.66436	0.00771352	0.427996	209.409	297.985	1.42298	Not Sig	ENSMUSG00000117294	TEC	nonsignificant	predicted gene, 49839 [Source:MGI Symbol;Acc:MGI:6270508]
Slc35f1	4156.63	-0.216142	0.081212	-2.66145	0.0077804	0.428371	4469.07	3844.18	0.860175	Not Sig	ENSMUSG00000038602	protein_coding	nonsignificant	solute carrier family 35, member F1 [Source:MGI Symbol;Acc:MGI:2139810]
Scara3	1502.21	-0.263879	0.0991381	-2.66173	0.00777411	0.428371	1638.01	1366.41	0.834189	Not Sig	ENSMUSG00000034463	protein_coding	nonsignificant	scavenger receptor class A, member 3 [Source:MGI Symbol;Acc:MGI:2444418]
Cops8	3138.02	-0.199058	0.0748431	-2.65968	0.00782153	0.429427	3354.56	2921.48	0.870898	Not Sig	ENSMUSG00000034432	protein_coding	nonsignificant	COP9 signalosome subunit 8 [Source:MGI Symbol;Acc:MGI:1915363]
Gm9899	427.674	-0.389975	0.146618	-2.65979	0.00781886	0.429427	486.063	369.286	0.75975	Not Sig	ENSMUSG00000053214	lncRNA	nonsignificant	predicted gene 9899 [Source:MGI Symbol;Acc:MGI:3708711]
Gm48757	98.8893	0.783711	0.294808	2.65837	0.00785186	0.429914	72.3751	125.404	1.73269	Not Sig	ENSMUSG00000112700	lncRNA	nonsignificant	predicted gene, 48757 [Source:MGI Symbol;Acc:MGI:6098437]
Clic6	987.092	2.38867	0.898712	2.65788	0.00786334	0.429914	316.592	1657.59	5.23573	Not Sig	ENSMUSG00000022949	protein_coding	nonsignificant	chloride intracellular channel 6 [Source:MGI Symbol;Acc:MGI:2146607]
Apba1	14178.9	-0.195353	0.0734957	-2.65801	0.00786029	0.429914	15136.9	13220.8	0.873413	Not Sig	ENSMUSG00000024897	protein_coding	nonsignificant	amyloid beta precursor protein binding family A member 1 [Source:MGI Symbol;Acc:MGI:1860297]
Nat8l	12225.7	-0.242129	0.0912405	-2.65375	0.00796028	0.433398	13249.6	11201.7	0.845435	Not Sig	ENSMUSG00000048142	protein_coding	nonsignificant	N-acetyltransferase 8-like [Source:MGI Symbol;Acc:MGI:2447776]
Gm43870	92.5489	0.87367	0.329185	2.65404	0.00795333	0.433398	65.0306	120.067	1.84632	Not Sig	ENSMUSG00000107712	TEC	nonsignificant	predicted gene, 43870 [Source:MGI Symbol;Acc:MGI:5690262]
Gm36939	407.363	0.562762	0.212041	2.65403	0.00795373	0.433398	328.688	486.037	1.47872	Not Sig	ENSMUSG00000102417	TEC	nonsignificant	predicted gene, 36939 [Source:MGI Symbol;Acc:MGI:5610167]
Lncpint	2976.03	0.337243	0.127122	2.6529	0.00798028	0.433883	2629.98	3322.08	1.26316	Not Sig	ENSMUSG00000044471	lncRNA	nonsignificant	long non-protein coding RNA, Trp53 induced transcript [Source:MGI Symbol;Acc:MGI:2673128]
Gm42819	189.106	0.64543	0.243393	2.6518	0.00800629	0.434694	146.979	231.233	1.57324	Not Sig	ENSMUSG00000105728	TEC	nonsignificant	predicted gene 42819 [Source:MGI Symbol;Acc:MGI:5662956]
Trim32	7809.99	-0.190549	0.0719222	-2.64937	0.00806417	0.43723	8325.81	7294.17	0.876091	Not Sig	ENSMUSG00000051675	protein_coding	nonsignificant	tripartite motif-containing 32 [Source:MGI Symbol;Acc:MGI:1917057]
Cfap206	108.426	0.707648	0.267272	2.64767	0.00810492	0.438225	82.318	134.533	1.63431	Not Sig	ENSMUSG00000028294	protein_coding	nonsignificant	cilia and flagella associated protein 206 [Source:MGI Symbol;Acc:MGI:1916579]
Gm44674	45.3138	1.06914	0.403744	2.64807	0.00809519	0.438225	29.1327	61.4949	2.11085	Not Sig	ENSMUSG00000108648	lncRNA	nonsignificant	predicted gene 44674 [Source:MGI Symbol;Acc:MGI:5753250]
Gnaz	4395.34	-0.203414	0.07686	-2.64655	0.00813174	0.439069	4705.89	4084.8	0.868018	Not Sig	ENSMUSG00000040009	protein_coding	nonsignificant	guanine nucleotide binding protein, alpha z subunit [Source:MGI Symbol;Acc:MGI:95780]
Calml4	178.376	1.60238	0.605733	2.64536	0.00816036	0.440007	88.3763	268.376	3.03674	Not Sig	ENSMUSG00000032246	protein_coding	nonsignificant	calmodulin-like 4 [Source:MGI Symbol;Acc:MGI:1922850]
Ptgs2	2281.75	0.246873	0.0933892	2.64348	0.00820577	0.440212	2087.85	2475.65	1.18574	Not Sig	ENSMUSG00000032487	protein_coding	nonsignificant	prostaglandin-endoperoxide synthase 2 [Source:MGI Symbol;Acc:MGI:97798]
Slc29a4	1271.91	0.309897	0.117237	2.64334	0.00820914	0.440212	1135.07	1408.74	1.2411	Not Sig	ENSMUSG00000050822	protein_coding	nonsignificant	solute carrier family 29 (nucleoside transporters), member 4 [Source:MGI Symbol;Acc:MGI:2385330]
Prrg3	1990.14	-0.230796	0.0872722	-2.64456	0.00817979	0.440212	2148.48	1831.8	0.852604	Not Sig	ENSMUSG00000033361	protein_coding	nonsignificant	proline rich Gla (G-carboxyglutamic acid) 3 (transmembrane) [Source:MGI Symbol;Acc:MGI:2685214]
Gdpd2	197.36	-0.497311	0.188128	-2.64347	0.00820612	0.440212	231.187	163.533	0.707364	Not Sig	ENSMUSG00000019359	protein_coding	nonsignificant	glycerophosphodiester phosphodiesterase domain containing 2 [Source:MGI Symbol;Acc:MGI:1918834]
Gm12052	3.09666	-4.90725	1.85846	-2.64049	0.00827852	0.443326	6.19332	0	0	Not Sig	ENSMUSG00000086256	lncRNA	nonsignificant	predicted gene 12052 [Source:MGI Symbol;Acc:MGI:3652305]
Syngr1	17263.3	-0.191632	0.0726412	-2.63807	0.00833802	0.445753	18408.7	16117.8	0.875552	Not Sig	ENSMUSG00000022415	protein_coding	nonsignificant	synaptogyrin 1 [Source:MGI Symbol;Acc:MGI:1328323]
Crebrf	7586.39	-0.187793	0.0711951	-2.63772	0.00834663	0.445753	8080.89	7091.9	0.877613	Not Sig	ENSMUSG00000048249	protein_coding	nonsignificant	CREB3 regulatory factor [Source:MGI Symbol;Acc:MGI:1924378]
Gm32444	658.477	0.443802	0.168364	2.63596	0.0083899	0.446845	557.051	759.903	1.36415	Not Sig	ENSMUSG00000102729	TEC	nonsignificant	predicted gene, 32444 [Source:MGI Symbol;Acc:MGI:5591603]
Gm3160	81.4146	0.747141	0.283392	2.63642	0.00837854	0.446845	60.665	102.164	1.68407	Not Sig	ENSMUSG00000085371	processed_pseudogene	nonsignificant	predicted pseudogene 3160 [Source:MGI Symbol;Acc:MGI:3781339]
Gm37984	558.377	0.369418	0.140316	2.63276	0.00846932	0.448676	486.269	630.485	1.29658	Not Sig	ENSMUSG00000104210	TEC	nonsignificant	predicted gene, 37984 [Source:MGI Symbol;Acc:MGI:5611212]
Gm13459	79.0811	0.804959	0.305802	2.63229	0.00848107	0.448676	57.3874	100.775	1.75605	Not Sig	ENSMUSG00000083973	processed_pseudogene	nonsignificant	predicted gene 13459 [Source:MGI Symbol;Acc:MGI:3651862]
Gm42942	315.275	0.567969	0.215809	2.63181	0.00849305	0.448676	253.687	376.863	1.48554	Not Sig	ENSMUSG00000106047	TEC	nonsignificant	predicted gene 42942 [Source:MGI Symbol;Acc:MGI:5663079]
Ccn2	438.67	-0.555137	0.210914	-2.63206	0.00848695	0.448676	523.034	354.306	0.677404	Not Sig	ENSMUSG00000019997	protein_coding	nonsignificant	cellular communication network factor 2 [Source:MGI Symbol;Acc:MGI:95537]
Pdxk	3883.12	-0.226894	0.0861744	-2.63297	0.00846421	0.448676	4189.72	3576.53	0.853645	Not Sig	ENSMUSG00000032788	protein_coding	nonsignificant	pyridoxal (pyridoxine, vitamin B6) kinase [Source:MGI Symbol;Acc:MGI:1351869]
A430090L17Rik	149.083	0.817531	0.310402	2.63378	0.00844396	0.448676	107.802	190.364	1.76587	Not Sig	ENSMUSG00000114213	lncRNA	nonsignificant	RIKEN cDNA A430090L17 gene [Source:MGI Symbol;Acc:MGI:2442754]
Speer4a2	129.966	0.686513	0.261192	2.62838	0.00857919	0.452616	99.6139	160.319	1.6094	Not Sig	ENSMUSG00000073116	protein_coding	nonsignificant	spermatogenesis associated glutamate (E)-rich protein 4A2 [Source:MGI Symbol;Acc:MGI:3641900]
Gm38120	337.468	0.520873	0.198551	2.62336	0.00870662	0.452649	276.586	398.349	1.44023	Not Sig	ENSMUSG00000103085	TEC	nonsignificant	predicted gene, 38120 [Source:MGI Symbol;Acc:MGI:5611348]
Utp14b	5139.69	0.209818	0.0798938	2.62621	0.00863419	0.452649	4766.5	5512.88	1.15659	Not Sig	ENSMUSG00000079470	protein_coding	nonsignificant	UTP14B small subunit processome component [Source:MGI Symbol;Acc:MGI:2445092]
Slc27a2	374.585	-0.375092	0.142763	-2.62737	0.00860471	0.452649	423.388	325.782	0.769463	Not Sig	ENSMUSG00000027359	protein_coding	nonsignificant	solute carrier family 27 (fatty acid transporter), member 2 [Source:MGI Symbol;Acc:MGI:1347099]
Gm15772	2039.48	-0.860337	0.327868	-2.62404	0.00868939	0.452649	2630.33	1448.62	0.550737	Not Sig	ENSMUSG00000062353	processed_pseudogene	nonsignificant	predicted gene 15772 [Source:MGI Symbol;Acc:MGI:3805541]
Gm26725	6.24399	3.63654	1.38596	2.62384	0.00869447	0.452649	0.977486	11.5105	11.7756	Not Sig	ENSMUSG00000097092	lncRNA	nonsignificant	predicted gene, 26725 [Source:MGI Symbol;Acc:MGI:5477219]
Gm18899	93.3608	0.699855	0.266558	2.62553	0.00865148	0.452649	71.0391	115.682	1.62843	Not Sig	ENSMUSG00000111932	processed_pseudogene	nonsignificant	predicted gene, 18899 [Source:MGI Symbol;Acc:MGI:5011084]
Gm18955	190.552	0.565119	0.215419	2.62335	0.00870702	0.452649	153.228	227.876	1.48717	Not Sig	ENSMUSG00000113840	processed_pseudogene	nonsignificant	predicted gene, 18955 [Source:MGI Symbol;Acc:MGI:5011140]
Gm47661	115.133	0.871401	0.331939	2.62518	0.00866027	0.452649	81.3198	148.947	1.83162	Not Sig	ENSMUSG00000114080	lncRNA	nonsignificant	predicted gene, 47661 [Source:MGI Symbol;Acc:MGI:6096748]
Gm18237	122.086	0.640927	0.244262	2.62393	0.00869212	0.452649	95.4001	148.771	1.55945	Not Sig	ENSMUSG00000116943	processed_pseudogene	nonsignificant	predicted gene, 18237 [Source:MGI Symbol;Acc:MGI:5010422]
Col8a1	421.535	1.85907	0.708588	2.62363	0.00869978	0.452649	182.182	660.888	3.62763	Not Sig	ENSMUSG00000068196	protein_coding	nonsignificant	collagen, type VIII, alpha 1 [Source:MGI Symbol;Acc:MGI:88463]
Gm26676	111.166	0.645841	0.246024	2.62512	0.00866192	0.452649	86.5881	135.745	1.56771	Not Sig	ENSMUSG00000097593	lncRNA	nonsignificant	predicted gene, 26676 [Source:MGI Symbol;Acc:MGI:5477170]
Ces1d	2.82779	5.12688	1.95668	2.6202	0.00878795	0.456251	0	5.65558	Inf	Not Sig	ENSMUSG00000056973	protein_coding	nonsignificant	carboxylesterase 1D [Source:MGI Symbol;Acc:MGI:2148202]
Gm43111	295.743	0.476713	0.181994	2.61938	0.00880887	0.456731	247.104	344.382	1.39367	Not Sig	ENSMUSG00000106472	lncRNA	nonsignificant	predicted gene 43111 [Source:MGI Symbol;Acc:MGI:5663248]
Gm37138	160.754	0.681795	0.260423	2.61803	0.00884398	0.457923	122.935	198.574	1.61527	Not Sig	ENSMUSG00000104149	TEC	nonsignificant	predicted gene, 37138 [Source:MGI Symbol;Acc:MGI:5610366]
Gm17976	86.9471	0.744761	0.28457	2.61714	0.00886696	0.457923	64.7589	109.135	1.68526	Not Sig	ENSMUSG00000099008	processed_pseudogene	nonsignificant	predicted gene, 17976 [Source:MGI Symbol;Acc:MGI:5010161]
Gm48748	32.2915	1.38591	0.529539	2.61721	0.00886527	0.457923	18.0049	46.5781	2.58696	Not Sig	ENSMUSG00000112019	lncRNA	nonsignificant	predicted gene, 48748 [Source:MGI Symbol;Acc:MGI:6098422]
Gm10259	2.92625	-4.82024	1.84237	-2.61633	0.0088881	0.45841	5.85249	0	0	Not Sig	ENSMUSG00000069083	processed_pseudogene	nonsignificant	predicted pseudogene 10259 [Source:MGI Symbol;Acc:MGI:3704211]
Gm38259	185.593	0.642909	0.245936	2.61413	0.00894551	0.458713	144.466	226.719	1.56936	Not Sig	ENSMUSG00000102253	TEC	nonsignificant	predicted gene, 38259 [Source:MGI Symbol;Acc:MGI:5611487]
Hrk	3423.44	-0.227233	0.0869051	-2.61473	0.00892993	0.458713	3693.38	3153.5	0.853824	Not Sig	ENSMUSG00000046607	protein_coding	nonsignificant	harakiri, BCL2 interacting protein (contains only BH3 domain) [Source:MGI Symbol;Acc:MGI:1201608]
Gm44862	46.469	1.11247	0.425604	2.61386	0.00895256	0.458713	29.236	63.702	2.17889	Not Sig	ENSMUSG00000109131	TEC	nonsignificant	predicted gene 44862 [Source:MGI Symbol;Acc:MGI:5753438]
Fzd4	1237.56	0.313648	0.119964	2.61452	0.00893519	0.458713	1103.07	1372.05	1.24384	Not Sig	ENSMUSG00000049791	protein_coding	nonsignificant	frizzled class receptor 4 [Source:MGI Symbol;Acc:MGI:108520]
Cdh18	931.899	-0.275891	0.105478	-2.61562	0.0089065	0.458713	1019.85	843.951	0.827526	Not Sig	ENSMUSG00000040420	protein_coding	nonsignificant	cadherin 18 [Source:MGI Symbol;Acc:MGI:1344366]
Aqp1	204.243	2.65803	1.01741	2.61253	0.00898735	0.458873	55.9163	352.569	6.3053	Not Sig	ENSMUSG00000004655	protein_coding	nonsignificant	aquaporin 1 [Source:MGI Symbol;Acc:MGI:103201]
Tmem170	439.003	0.358079	0.137069	2.6124	0.00899084	0.458873	384.57	493.436	1.28308	Not Sig	ENSMUSG00000031953	protein_coding	nonsignificant	transmembrane protein 170 [Source:MGI Symbol;Acc:MGI:106426]
Trim37	26629.7	-0.176287	0.0674585	-2.61327	0.00896811	0.458873	28254.1	25005.2	0.88501	Not Sig	ENSMUSG00000018548	protein_coding	nonsignificant	tripartite motif-containing 37 [Source:MGI Symbol;Acc:MGI:2153072]
2900022M07Rik	430.685	0.404916	0.155381	2.60596	0.00916178	0.460782	370.193	491.177	1.32681	Not Sig	ENSMUSG00000102386	TEC	nonsignificant	RIKEN cDNA 2900022M07 gene [Source:MGI Symbol;Acc:MGI:1920201]
Norad	62163.5	-0.182757	0.0701226	-2.60626	0.00915377	0.460782	66096.2	58230.7	0.880999	Not Sig	ENSMUSG00000102869	lncRNA	nonsignificant	non-coding RNA activated by DNA damage [Source:MGI Symbol;Acc:MGI:1914767]
5430420F09Rik	63.4229	0.90339	0.346107	2.61015	0.00905034	0.460782	44.1065	82.7392	1.87589	Not Sig	ENSMUSG00000102808	TEC	nonsignificant	RIKEN cDNA 5430420F09 gene [Source:MGI Symbol;Acc:MGI:1921741]
Miip	532.511	-0.349436	0.134129	-2.60523	0.00918127	0.460782	596.652	468.37	0.784998	Not Sig	ENSMUSG00000029022	protein_coding	nonsignificant	migration and invasion inhibitory protein [Source:MGI Symbol;Acc:MGI:106506]
Gm43577	165.089	0.569676	0.218586	2.60619	0.00915562	0.460782	132.568	197.609	1.49063	Not Sig	ENSMUSG00000105287	lncRNA	nonsignificant	predicted gene 43577 [Source:MGI Symbol;Acc:MGI:5663714]
Acacb	382.261	0.522225	0.20033	2.60682	0.00913876	0.460782	313.124	451.398	1.4416	Not Sig	ENSMUSG00000042010	protein_coding	nonsignificant	acetyl-Coenzyme A carboxylase beta [Source:MGI Symbol;Acc:MGI:2140940]
Gm26807	86.6175	0.989973	0.379744	2.60695	0.00913529	0.460782	57.9642	115.271	1.98866	Not Sig	ENSMUSG00000097484	lncRNA	nonsignificant	predicted gene, 26807 [Source:MGI Symbol;Acc:MGI:5477301]
Gm44022	408.429	0.495317	0.190101	2.60555	0.00917261	0.460782	338.609	478.249	1.41239	Not Sig	ENSMUSG00000107706	TEC	nonsignificant	predicted gene, 44022 [Source:MGI Symbol;Acc:MGI:5690414]
Scn1b	10260.7	-0.232921	0.0893624	-2.60648	0.00914789	0.460782	11089.1	9432.41	0.850603	Not Sig	ENSMUSG00000019194	protein_coding	nonsignificant	sodium channel, voltage-gated, type I, beta [Source:MGI Symbol;Acc:MGI:98247]
Klf2	262.858	0.60241	0.231161	2.60602	0.00916004	0.460782	209.135	316.582	1.51377	Not Sig	ENSMUSG00000055148	protein_coding	nonsignificant	Kruppel-like transcription factor 2 (lung) [Source:MGI Symbol;Acc:MGI:1342772]
Gm48740	254.851	0.497569	0.19078	2.60808	0.00910526	0.460782	211.048	298.653	1.41509	Not Sig	ENSMUSG00000111854	lncRNA	nonsignificant	predicted gene, 48740 [Source:MGI Symbol;Acc:MGI:6098406]
Gm47342	103.626	0.955412	0.366343	2.60798	0.00910794	0.460782	70.5926	136.66	1.9359	Not Sig	ENSMUSG00000112243	TEC	nonsignificant	predicted gene, 47342 [Source:MGI Symbol;Acc:MGI:6096236]
Ankrd33b	7920.72	-0.1996	0.0765219	-2.6084	0.00909669	0.460782	8468.59	7372.86	0.870613	Not Sig	ENSMUSG00000022237	protein_coding	nonsignificant	ankyrin repeat domain 33B [Source:MGI Symbol;Acc:MGI:1917904]
Spata18	76.2304	0.950368	0.365145	2.60272	0.00924881	0.462984	52.0654	100.395	1.92826	Not Sig	ENSMUSG00000029155	protein_coding	nonsignificant	spermatogenesis associated 18 [Source:MGI Symbol;Acc:MGI:1920722]
Gm43788	310.3	0.42845	0.16459	2.60313	0.00923769	0.462984	264.354	356.247	1.34761	Not Sig	ENSMUSG00000107286	TEC	nonsignificant	predicted gene 43788 [Source:MGI Symbol;Acc:MGI:5663925]
Gm45652	293.252	0.634008	0.243709	2.6015	0.00928167	0.463444	229.57	356.935	1.5548	Not Sig	ENSMUSG00000110263	TEC	nonsignificant	predicted gene 45652 [Source:MGI Symbol;Acc:MGI:5791488]
Casp1	114.174	-0.694008	0.26676	-2.60162	0.00927854	0.463444	141.013	87.335	0.61934	Not Sig	ENSMUSG00000025888	protein_coding	nonsignificant	caspase 1 [Source:MGI Symbol;Acc:MGI:96544]
Gm38034	207.953	0.539624	0.207533	2.60018	0.00931758	0.463652	169.284	246.622	1.45686	Not Sig	ENSMUSG00000102844	TEC	nonsignificant	predicted gene, 38034 [Source:MGI Symbol;Acc:MGI:5611262]
Gm21411	2.7143	5.04978	1.94185	2.6005	0.00930891	0.463652	0	5.4286	Inf	Not Sig	ENSMUSG00000045699	protein_coding	nonsignificant	predicted gene, 21411 [Source:MGI Symbol;Acc:MGI:5434766]
Cd99l2	3662.52	-0.227396	0.0874589	-2.60004	0.00932136	0.463652	3951.19	3373.84	0.853878	Not Sig	ENSMUSG00000035776	protein_coding	nonsignificant	CD99 antigen-like 2 [Source:MGI Symbol;Acc:MGI:2177151]
Gm48943	4.53784	4.82714	1.85739	2.59889	0.0093526	0.464615	0.325829	8.74985	26.8541	Not Sig	ENSMUSG00000115171	unprocessed_pseudogene	nonsignificant	predicted gene, 48943 [Source:MGI Symbol;Acc:MGI:6118265]
Gm13380	80.5933	0.808265	0.311214	2.59714	0.00940046	0.465031	58.5783	102.608	1.75164	Not Sig	ENSMUSG00000085206	lncRNA	nonsignificant	predicted gene 13380 [Source:MGI Symbol;Acc:MGI:3649647]
Gm47702	271.353	0.604601	0.232859	2.59642	0.00942002	0.465031	214.505	328.201	1.53004	Not Sig	ENSMUSG00000112914	TEC	nonsignificant	predicted gene, 47702 [Source:MGI Symbol;Acc:MGI:6096817]
Evl	3063.81	-0.238553	0.0918325	-2.5977	0.00938505	0.465031	3317.85	2809.78	0.846867	Not Sig	ENSMUSG00000021262	protein_coding	nonsignificant	Ena-vasodilator stimulated phosphoprotein [Source:MGI Symbol;Acc:MGI:1194884]
Gm18990	65.3273	0.856506	0.329881	2.59641	0.00942037	0.465031	46.4665	84.1881	1.8118	Not Sig	ENSMUSG00000114622	processed_pseudogene	nonsignificant	predicted gene, 18990 [Source:MGI Symbol;Acc:MGI:5011175]
Il10rb	331.397	0.570966	0.219798	2.59768	0.00938559	0.465031	266.603	396.19	1.48607	Not Sig	ENSMUSG00000022969	protein_coding	nonsignificant	interleukin 10 receptor, beta [Source:MGI Symbol;Acc:MGI:109380]
Gm8459	2.64805	5.0266	1.93728	2.59467	0.00946806	0.465624	0	5.2961	Inf	Not Sig	ENSMUSG00000089931	transcribed_processed_pseudogene	nonsignificant	predicted gene 8459 [Source:MGI Symbol;Acc:MGI:3647456]
Foxo3	5828.18	-0.202656	0.0780965	-2.59494	0.00946083	0.465624	6237.35	5419	0.868799	Not Sig	ENSMUSG00000048756	protein_coding	nonsignificant	forkhead box O3 [Source:MGI Symbol;Acc:MGI:1890081]
Dmrt2	86.0603	-0.760325	0.292939	-2.5955	0.0094452	0.465624	108.273	63.8474	0.589688	Not Sig	ENSMUSG00000048138	protein_coding	nonsignificant	doublesex and mab-3 related transcription factor 2 [Source:MGI Symbol;Acc:MGI:1330307]
Hba-a1	1138.49	1.13489	0.437773	2.59241	0.00953062	0.467526	712.215	1564.77	2.19704	Not Sig	ENSMUSG00000069919	protein_coding	nonsignificant	hemoglobin alpha, adult chain 1 [Source:MGI Symbol;Acc:MGI:96015]
Gjb2	454.218	-0.371174	0.14317	-2.59253	0.00952719	0.467526	513.339	395.097	0.769661	Not Sig	ENSMUSG00000046352	protein_coding	nonsignificant	gap junction protein, beta 2 [Source:MGI Symbol;Acc:MGI:95720]
Gm16147	145.237	0.625916	0.241485	2.59195	0.00954338	0.467566	113.926	176.548	1.54967	Not Sig	ENSMUSG00000090078	processed_pseudogene	nonsignificant	predicted gene 16147 [Source:MGI Symbol;Acc:MGI:3801802]
Eef1a2	32436.8	-0.182079	0.0702713	-2.59109	0.00956735	0.46757	34482.7	30390.9	0.881338	Not Sig	ENSMUSG00000016349	protein_coding	nonsignificant	eukaryotic translation elongation factor 1 alpha 2 [Source:MGI Symbol;Acc:MGI:1096317]
Tmem130	5900.27	-0.231006	0.0891514	-2.59117	0.00956507	0.46757	6373.46	5427.09	0.851513	Not Sig	ENSMUSG00000043388	protein_coding	nonsignificant	transmembrane protein 130 [Source:MGI Symbol;Acc:MGI:3607706]
Smarcc2	17400.2	-0.169477	0.0654294	-2.59022	0.00959138	0.46816	18422.5	16377.8	0.88901	Not Sig	ENSMUSG00000025369	protein_coding	nonsignificant	SWI/SNF related, matrix associated, actin dependent regulator of chromatin, subfamily c, member 2 [Source:MGI Symbol;Acc:MGI:1915344]
Gm37960	222.675	0.504178	0.194731	2.5891	0.0096226	0.469099	183.803	261.547	1.42297	Not Sig	ENSMUSG00000104391	TEC	nonsignificant	predicted gene, 37960 [Source:MGI Symbol;Acc:MGI:5611188]
Insig1	3004.31	-0.201739	0.0779316	-2.58866	0.00963489	0.469114	3213.82	2794.81	0.869624	Not Sig	ENSMUSG00000045294	protein_coding	nonsignificant	insulin induced gene 1 [Source:MGI Symbol;Acc:MGI:1916289]
Gm37531	369.111	0.441074	0.170502	2.58691	0.00968403	0.470013	312.425	425.798	1.36288	Not Sig	ENSMUSG00000103696	TEC	nonsignificant	predicted gene, 37531 [Source:MGI Symbol;Acc:MGI:5610759]
Dlec1	159.678	0.616687	0.238357	2.58724	0.00967486	0.470013	126.441	192.915	1.52574	Not Sig	ENSMUSG00000038060	protein_coding	nonsignificant	deleted in lung and esophageal cancer 1 [Source:MGI Symbol;Acc:MGI:2443671]
Akap12	1982.17	-0.262385	0.101445	-2.58648	0.00969605	0.470013	2163.03	1801.31	0.832772	Not Sig	ENSMUSG00000038587	protein_coding	nonsignificant	A kinase anchor protein 12 [Source:MGI Symbol;Acc:MGI:1932576]
Psmc5	4740.58	-0.175753	0.0679669	-2.58587	0.0097134	0.470013	5029.11	4452.04	0.885255	Not Sig	ENSMUSG00000020708	protein_coding	nonsignificant	protease (prosome, macropain) 26S subunit, ATPase 5 [Source:MGI Symbol;Acc:MGI:105047]
Gm37606	667.462	0.421124	0.162851	2.58594	0.00971128	0.470013	570.101	764.822	1.34155	Not Sig	ENSMUSG00000103851	TEC	nonsignificant	predicted gene, 37606 [Source:MGI Symbol;Acc:MGI:5610834]
Ier5	1900.44	-0.261936	0.101398	-2.58324	0.00978768	0.470121	2073.12	1727.75	0.833406	Not Sig	ENSMUSG00000056708	protein_coding	nonsignificant	immediate early response 5 [Source:MGI Symbol;Acc:MGI:1337072]
9630010A21Rik	834.163	0.438738	0.169798	2.58387	0.00976976	0.470121	708.559	959.767	1.35453	Not Sig	ENSMUSG00000103867	TEC	nonsignificant	RIKEN cDNA 9630010A21 gene [Source:MGI Symbol;Acc:MGI:2442787]
Nr4a2	4590.99	-0.309886	0.119947	-2.58353	0.00977936	0.470121	5084.04	4097.95	0.806042	Not Sig	ENSMUSG00000026826	protein_coding	nonsignificant	nuclear receptor subfamily 4, group A, member 2 [Source:MGI Symbol;Acc:MGI:1352456]
Gm48585	112.131	0.624897	0.241864	2.58367	0.00977554	0.470121	88.1153	136.146	1.54509	Not Sig	ENSMUSG00000113250	TEC	nonsignificant	predicted gene, 48585 [Source:MGI Symbol;Acc:MGI:6098155]
Septin3	33617.6	-0.178989	0.0692758	-2.58371	0.00977438	0.470121	35700	31535.2	0.883339	Not Sig	ENSMUSG00000022456	protein_coding	nonsignificant	septin 3 [Source:MGI Symbol;Acc:MGI:1345148]
Cacul1	4606.63	-0.1869	0.0722989	-2.5851	0.00973509	0.470121	4905.47	4307.78	0.878157	Not Sig	ENSMUSG00000033417	protein_coding	nonsignificant	CDK2 associated, cullin domain 1 [Source:MGI Symbol;Acc:MGI:1926082]
Kif5c	76548.2	-0.164181	0.0636187	-2.5807	0.00985999	0.471857	80899	72197.4	0.892439	Not Sig	ENSMUSG00000026764	protein_coding	nonsignificant	kinesin family member 5C [Source:MGI Symbol;Acc:MGI:1098269]
Gm45537	211.16	0.600518	0.232646	2.58125	0.00984426	0.471857	167.853	254.467	1.51601	Not Sig	ENSMUSG00000109606	TEC	nonsignificant	predicted gene 45537 [Source:MGI Symbol;Acc:MGI:5791373]
Ttc9	3290.99	-0.231608	0.0897438	-2.58077	0.00985801	0.471857	3553.98	3028.01	0.852004	Not Sig	ENSMUSG00000042734	protein_coding	nonsignificant	tetratricopeptide repeat domain 9 [Source:MGI Symbol;Acc:MGI:1916730]
Gm37226	397.206	0.407411	0.157937	2.57958	0.00989198	0.472233	341.111	453.301	1.3289	Not Sig	ENSMUSG00000102533	TEC	nonsignificant	predicted gene, 37226 [Source:MGI Symbol;Acc:MGI:5610454]
Slc16a2	3414.07	0.243134	0.0942429	2.57987	0.00988385	0.472233	3125.64	3702.5	1.18456	Not Sig	ENSMUSG00000033965	protein_coding	nonsignificant	solute carrier family 16 (monocarboxylic acid transporters), member 2 [Source:MGI Symbol;Acc:MGI:1203732]
Ccdc187	222.899	0.611478	0.237204	2.57786	0.00994153	0.472412	176.235	269.562	1.52956	Not Sig	ENSMUSG00000048038	protein_coding	nonsignificant	coiled-coil domain containing 187 [Source:MGI Symbol;Acc:MGI:3045295]
B4galt5	2795.3	-0.239365	0.0928125	-2.57901	0.00990827	0.472412	3026.8	2563.8	0.847035	Not Sig	ENSMUSG00000017929	protein_coding	nonsignificant	UDP-Gal:betaGlcNAc beta 1,4-galactosyltransferase, polypeptide 5 [Source:MGI Symbol;Acc:MGI:1927169]
Gm43887	120.46	0.884957	0.343268	2.57804	0.00993638	0.472412	84.285	156.636	1.85841	Not Sig	ENSMUSG00000108189	TEC	nonsignificant	predicted gene, 43887 [Source:MGI Symbol;Acc:MGI:5690279]
Trim41	2074.63	-0.207006	0.0803045	-2.57777	0.009944	0.472412	2222.92	1926.34	0.866581	Not Sig	ENSMUSG00000040365	protein_coding	nonsignificant	tripartite motif-containing 41 [Source:MGI Symbol;Acc:MGI:2384814]
Gm38014	203.034	0.578725	0.224571	2.57703	0.00996539	0.472855	162.468	243.601	1.49938	Not Sig	ENSMUSG00000104406	TEC	nonsignificant	predicted gene, 38014 [Source:MGI Symbol;Acc:MGI:5611242]
Gm43072	181.073	0.505421	0.196233	2.57562	0.0100059	0.474204	149.525	212.622	1.42198	Not Sig	ENSMUSG00000106092	TEC	nonsignificant	predicted gene 43072 [Source:MGI Symbol;Acc:MGI:5663209]
Nes	658.253	0.318765	0.123846	2.57387	0.0100567	0.476035	586.591	729.914	1.24433	Not Sig	ENSMUSG00000004891	protein_coding	nonsignificant	nestin [Source:MGI Symbol;Acc:MGI:101784]
Ap2a1	7632.26	-0.206748	0.0804093	-2.57119	0.010135	0.47916	8179.45	7085.06	0.866202	Not Sig	ENSMUSG00000060279	protein_coding	nonsignificant	adaptor-related protein complex 2, alpha 1 subunit [Source:MGI Symbol;Acc:MGI:101921]
Gm5067	249.883	0.599612	0.233541	2.56748	0.0102442	0.483739	199.444	300.321	1.50579	Not Sig	ENSMUSG00000090671	transcribed_processed_pseudogene	nonsignificant	predicted gene 5067 [Source:MGI Symbol;Acc:MGI:3644982]
2900092N22Rik	601.003	0.916349	0.357204	2.56533	0.0103077	0.485495	416.25	785.756	1.8877	Not Sig	ENSMUSG00000104034	TEC	nonsignificant	RIKEN cDNA 2900092N22 gene [Source:MGI Symbol;Acc:MGI:1920357]
Gm9768	23.3038	-1.40211	0.54664	-2.56497	0.0103186	0.485495	33.9406	12.667	0.37321	Not Sig	ENSMUSG00000108391	TEC	nonsignificant	predicted gene 9768 [Source:MGI Symbol;Acc:MGI:3704239]
Fam161a	319.573	0.515463	0.200904	2.56571	0.0102964	0.485495	262.747	376.399	1.43255	Not Sig	ENSMUSG00000049811	protein_coding	nonsignificant	family with sequence similarity 161, member A [Source:MGI Symbol;Acc:MGI:1921123]
Lgalsl	4740.83	-0.206774	0.0806828	-2.5628	0.0103832	0.487362	5081.88	4399.78	0.865778	Not Sig	ENSMUSG00000042363	protein_coding	nonsignificant	galectin like [Source:MGI Symbol;Acc:MGI:1916114]
Gm15237	126.853	0.638941	0.249304	2.56289	0.0103803	0.487362	98.9071	154.799	1.56509	Not Sig	ENSMUSG00000084180	processed_pseudogene	nonsignificant	predicted gene 15237 [Source:MGI Symbol;Acc:MGI:3705737]
Gm38368	167.292	0.550256	0.21478	2.56195	0.0104086	0.487969	135.706	198.878	1.46551	Not Sig	ENSMUSG00000104427	TEC	nonsignificant	predicted gene, 38368 [Source:MGI Symbol;Acc:MGI:5611596]
Ahcy	357.804	-0.460667	0.179979	-2.55957	0.0104803	0.489546	415.201	300.407	0.723521	Not Sig	ENSMUSG00000027597	protein_coding	nonsignificant	S-adenosylhomocysteine hydrolase [Source:MGI Symbol;Acc:MGI:87968]
Gm15577	355.111	0.612314	0.239298	2.55879	0.0105036	0.489546	280.633	429.589	1.53078	Not Sig	ENSMUSG00000086708	lncRNA	nonsignificant	predicted gene 15577 [Source:MGI Symbol;Acc:MGI:3783025]
Gnb1	39462.2	-0.168145	0.0656915	-2.55962	0.0104786	0.489546	41759.4	37165.1	0.889982	Not Sig	ENSMUSG00000029064	protein_coding	nonsignificant	guanine nucleotide binding protein (G protein), beta 1 [Source:MGI Symbol;Acc:MGI:95781]
Gm44550	228.046	0.560462	0.219037	2.55876	0.0105047	0.489546	183.874	272.218	1.48046	Not Sig	ENSMUSG00000109379	TEC	nonsignificant	predicted gene 44550 [Source:MGI Symbol;Acc:MGI:5753126]
Git1	13321	-0.236724	0.0924906	-2.55944	0.0104841	0.489546	14412.6	12229.4	0.848524	Not Sig	ENSMUSG00000011877	protein_coding	nonsignificant	GIT ArfGAP 1 [Source:MGI Symbol;Acc:MGI:1927140]
Pcmt1	5846.81	-0.181725	0.0710489	-2.55774	0.0105355	0.490394	6215.49	5478.12	0.881366	Not Sig	ENSMUSG00000019795	protein_coding	nonsignificant	protein-L-isoaspartate (D-aspartate) O-methyltransferase 1 [Source:MGI Symbol;Acc:MGI:97502]
Nxpe3	1619.17	-0.223412	0.0873923	-2.55642	0.0105754	0.491669	1744.04	1494.29	0.856796	Not Sig	ENSMUSG00000075033	protein_coding	nonsignificant	neurexophilin and PC-esterase domain family, member 3 [Source:MGI Symbol;Acc:MGI:2686598]
9530056E24Rik	343.198	0.460624	0.180289	2.55492	0.0106213	0.4924	288.053	398.343	1.38288	Not Sig	ENSMUSG00000115955	TEC	nonsignificant	RIKEN cDNA 9530056E24 gene [Source:MGI Symbol;Acc:MGI:2441750]
	5.4332	-3.66337	1.43399	-2.55467	0.0106289	0.4924	9.98466	0.881736	0.0883091	Not Sig	ENSMUSG00000113892		nonsignificant
Kcnj4	2553.65	-0.304224	0.119079	-2.55481	0.0106247	0.4924	2821.32	2285.98	0.810251	Not Sig	ENSMUSG00000044216	protein_coding	nonsignificant	potassium inwardly-rectifying channel, subfamily J, member 4 [Source:MGI Symbol;Acc:MGI:104743]
Zfp991	150.32	-0.662431	0.259472	-2.553	0.0106799	0.492615	183.623	117.016	0.63726	Not Sig	ENSMUSG00000067916	protein_coding	nonsignificant	zinc finger protein 991 [Source:MGI Symbol;Acc:MGI:3701604]
Mitf	975.714	0.298052	0.116708	2.55382	0.0106547	0.492615	875.617	1075.81	1.22863	Not Sig	ENSMUSG00000035158	protein_coding	nonsignificant	melanogenesis associated transcription factor [Source:MGI Symbol;Acc:MGI:104554]
Gm48091	101.924	0.759786	0.297631	2.55278	0.0106867	0.492615	75.811	128.037	1.68889	Not Sig	ENSMUSG00000110741	lncRNA	nonsignificant	predicted gene, 48091 [Source:MGI Symbol;Acc:MGI:6097434]
Atp8a2	5304.99	-0.17138	0.0671317	-2.5529	0.0106831	0.492615	5619.71	4990.26	0.887992	Not Sig	ENSMUSG00000021983	protein_coding	nonsignificant	ATPase, aminophospholipid transporter-like, class I, type 8A, member 2 [Source:MGI Symbol;Acc:MGI:1354710]
Onecut2	1737.81	0.264429	0.103598	2.55246	0.0106964	0.492615	1577.92	1897.7	1.20266	Not Sig	ENSMUSG00000045991	protein_coding	nonsignificant	one cut domain, family member 2 [Source:MGI Symbol;Acc:MGI:1891408]
Gm38353	325.765	0.567843	0.222527	2.55179	0.010717	0.49289	261.679	389.85	1.48981	Not Sig	ENSMUSG00000102820	lncRNA	nonsignificant	predicted gene, 38353 [Source:MGI Symbol;Acc:MGI:5611581]
Atad2b	4790.81	0.193136	0.0756965	2.55145	0.0107276	0.49289	4470.05	5111.57	1.14352	Not Sig	ENSMUSG00000052812	protein_coding	nonsignificant	ATPase family, AAA domain containing 2B [Source:MGI Symbol;Acc:MGI:2444798]
Lmtk2	12668.2	-0.182134	0.0714227	-2.55008	0.0107698	0.494247	13468.5	11867.8	0.881157	Not Sig	ENSMUSG00000038970	protein_coding	nonsignificant	lemur tyrosine kinase 2 [Source:MGI Symbol;Acc:MGI:3036247]
Gm37058	91.9635	0.69409	0.272425	2.54782	0.0108399	0.495142	70.2977	113.629	1.6164	Not Sig	ENSMUSG00000102750	TEC	nonsignificant	predicted gene, 37058 [Source:MGI Symbol;Acc:MGI:5610286]
Gm45183	623.099	0.481991	0.189166	2.54798	0.010835	0.495142	519.266	726.931	1.39992	Not Sig	ENSMUSG00000109353	TEC	nonsignificant	predicted gene 45183 [Source:MGI Symbol;Acc:MGI:5753759]
Gm30239	3.16233	-4.92318	1.93227	-2.54787	0.0108383	0.495142	6.32465	0	0	Not Sig	ENSMUSG00000114115	lncRNA	nonsignificant	predicted gene, 30239 [Source:MGI Symbol;Acc:MGI:5589398]
Prlr	1734.05	1.92676	0.75603	2.54853	0.0108179	0.495142	722.242	2745.85	3.80185	Not Sig	ENSMUSG00000005268	protein_coding	nonsignificant	prolactin receptor [Source:MGI Symbol;Acc:MGI:97763]
Acsl5	2919.64	-0.205848	0.0808129	-2.54722	0.0108586	0.49542	3128.01	2711.28	0.866776	Not Sig	ENSMUSG00000024981	protein_coding	nonsignificant	acyl-CoA synthetase long-chain family member 5 [Source:MGI Symbol;Acc:MGI:1919129]
Gm14411	132.719	0.719244	0.282576	2.54531	0.010918	0.497209	100.029	165.409	1.65362	Not Sig	ENSMUSG00000082765	unprocessed_pseudogene	nonsignificant	predicted gene 14411 [Source:MGI Symbol;Acc:MGI:3649821]
Gm19514	99.3738	0.724833	0.284836	2.54474	0.0109359	0.497209	74.9469	123.801	1.65185	Not Sig	ENSMUSG00000108478	TEC	nonsignificant	predicted gene, 19514 [Source:MGI Symbol;Acc:MGI:5011699]
Tnip1	1017.56	-0.283309	0.111315	-2.54511	0.0109244	0.497209	1118.31	916.824	0.819834	Not Sig	ENSMUSG00000020400	protein_coding	nonsignificant	TNFAIP3 interacting protein 1 [Source:MGI Symbol;Acc:MGI:1926194]
Ptger3	284.27	-0.450807	0.177291	-2.54276	0.0109982	0.499117	327.969	240.572	0.733522	Not Sig	ENSMUSG00000040016	protein_coding	nonsignificant	prostaglandin E receptor 3 (subtype EP3) [Source:MGI Symbol;Acc:MGI:97795]
Impact	16789.4	-0.260966	0.102638	-2.54259	0.0110034	0.499117	18305.5	15273.4	0.834359	Not Sig	ENSMUSG00000024423	protein_coding	nonsignificant	impact, RWD domain protein [Source:MGI Symbol;Acc:MGI:1098233]
Mpp7	545.045	0.470348	0.185063	2.54155	0.0110361	0.500021	456.193	633.898	1.38954	Not Sig	ENSMUSG00000057440	protein_coding	nonsignificant	membrane protein, palmitoylated 7 (MAGUK p55 subfamily member 7) [Source:MGI Symbol;Acc:MGI:1922989]
Gm43258	98.9986	0.771994	0.303841	2.54078	0.0110606	0.500097	73.1222	124.875	1.70776	Not Sig	ENSMUSG00000105846	lncRNA	nonsignificant	predicted gene 43258 [Source:MGI Symbol;Acc:MGI:5663395]
Pcdhb4	295.851	-0.487877	0.192025	-2.54069	0.0110633	0.500097	344.557	247.144	0.717279	Not Sig	ENSMUSG00000045689	protein_coding	nonsignificant	protocadherin beta 4 [Source:MGI Symbol;Acc:MGI:2136738]
Gm37925	163.068	0.587138	0.231294	2.53849	0.0111332	0.501907	130.149	195.986	1.50586	Not Sig	ENSMUSG00000102481	TEC	nonsignificant	predicted gene, 37925 [Source:MGI Symbol;Acc:MGI:5611153]
Slc7a1	3080.27	-0.216222	0.0851865	-2.53822	0.0111418	0.501907	3310.4	2850.14	0.860964	Not Sig	ENSMUSG00000041313	protein_coding	nonsignificant	solute carrier family 7 (cationic amino acid transporter, y+ system), member 1 [Source:MGI Symbol;Acc:MGI:88117]
Gm45178	652.123	0.845616	0.333076	2.53881	0.0111231	0.501907	466.019	838.226	1.7987	Not Sig	ENSMUSG00000109562	TEC	nonsignificant	predicted gene 45178 [Source:MGI Symbol;Acc:MGI:5753754]
Coro2a	1131.79	-0.246391	0.097141	-2.53643	0.0111991	0.503906	1228.11	1035.46	0.843134	Not Sig	ENSMUSG00000028337	protein_coding	nonsignificant	coronin, actin binding protein 2A [Source:MGI Symbol;Acc:MGI:1345966]
Kl	3512.99	1.27785	0.504064	2.53509	0.0112419	0.504672	2051.52	4974.47	2.42478	Not Sig	ENSMUSG00000058488	protein_coding	nonsignificant	klotho [Source:MGI Symbol;Acc:MGI:1101771]
Gm46339	47.0752	1.08285	0.427117	2.53526	0.0112363	0.504672	30.0777	64.0726	2.13023	Not Sig	ENSMUSG00000113959	TEC	nonsignificant	predicted gene, 46339 [Source:MGI Symbol;Acc:MGI:5825976]
Thbs1	464.468	0.379447	0.149768	2.53356	0.0112911	0.505799	404.042	524.894	1.29911	Not Sig	ENSMUSG00000040152	protein_coding	nonsignificant	thrombospondin 1 [Source:MGI Symbol;Acc:MGI:98737]
Naa12	2644.24	-0.213975	0.084458	-2.5335	0.0112928	0.505799	2840.78	2447.7	0.861629	Not Sig	ENSMUSG00000024571	protein_coding	nonsignificant	N(alpha)-acetyltransferase 12, NatA catalytic subunit [Source:MGI Symbol;Acc:MGI:3833940]
Mir764	14.8039	2.08589	0.823575	2.53273	0.011318	0.506346	5.64383	23.9639	4.24604	Not Sig	ENSMUSG00000076458	miRNA	nonsignificant	microRNA 764 [Source:MGI Symbol;Acc:MGI:3691610]
Ppa1	2818.12	-0.204718	0.0808723	-2.53138	0.0113616	0.507138	3018.78	2617.46	0.867057	Not Sig	ENSMUSG00000020089	protein_coding	nonsignificant	pyrophosphatase (inorganic) 1 [Source:MGI Symbol;Acc:MGI:97831]
Atp7a	1223.07	0.284757	0.11249	2.53141	0.0113605	0.507138	1103.21	1342.93	1.21729	Not Sig	ENSMUSG00000033792	protein_coding	nonsignificant	ATPase, Cu++ transporting, alpha polypeptide [Source:MGI Symbol;Acc:MGI:99400]
Gm43896	372.937	0.484857	0.191686	2.52944	0.0114246	0.509371	310.159	435.716	1.40481	Not Sig	ENSMUSG00000108246	TEC	nonsignificant	predicted gene, 43896 [Source:MGI Symbol;Acc:MGI:5690288]
Gm11753	14.9558	1.72221	0.681061	2.52871	0.0114482	0.509844	6.93328	22.9784	3.31421	Not Sig	ENSMUSG00000085548	lncRNA	nonsignificant	predicted gene 11753 [Source:MGI Symbol;Acc:MGI:3651699]
Gm15902	286.039	0.618027	0.244507	2.52765	0.011483	0.510812	225.136	346.942	1.54103	Not Sig	ENSMUSG00000086012	lncRNA	nonsignificant	predicted gene 15902 [Source:MGI Symbol;Acc:MGI:3802133]
Gm44802	801.655	1.02909	0.407381	2.52611	0.0115333	0.511886	527.207	1076.1	2.04114	Not Sig	ENSMUSG00000108918	TEC	nonsignificant	predicted gene 44802 [Source:MGI Symbol;Acc:MGI:5753378]
Gprc5c	161.272	0.663553	0.262666	2.52622	0.0115296	0.511886	124.461	198.082	1.59152	Not Sig	ENSMUSG00000051043	protein_coding	nonsignificant	G protein-coupled receptor, family C, group 5, member C [Source:MGI Symbol;Acc:MGI:1917605]
Gm44799	629.932	0.873253	0.345945	2.52425	0.0115944	0.514014	444.835	815.029	1.83221	Not Sig	ENSMUSG00000109095	TEC	nonsignificant	predicted gene 44799 [Source:MGI Symbol;Acc:MGI:5753375]
Gm22883	72.6958	0.75851	0.300599	2.52333	0.0116248	0.51478	53.8704	91.5212	1.69891	Not Sig	ENSMUSG00000088001	snRNA	nonsignificant	predicted gene, 22883 [Source:MGI Symbol;Acc:MGI:5452660]
Gm10484	397.437	0.409651	0.162439	2.52188	0.0116729	0.516324	340.801	454.072	1.33237	Not Sig	ENSMUSG00000105864	lncRNA	nonsignificant	predicted gene 10484 [Source:MGI Symbol;Acc:MGI:3642756]
4933426K07Rik	19.6508	1.56477	0.620926	2.52006	0.0117334	0.517833	9.89778	29.4039	2.97075	Not Sig	ENSMUSG00000086933	lncRNA	nonsignificant	RIKEN cDNA 4933426K07 gene [Source:MGI Symbol;Acc:MGI:1918404]
4930570B17Rik	224.942	0.551507	0.218847	2.52006	0.0117334	0.517833	182.125	267.759	1.47019	Not Sig	ENSMUSG00000115337	lncRNA	nonsignificant	RIKEN cDNA 4930570B17 gene [Source:MGI Symbol;Acc:MGI:1923191]
Gm47411	132.287	0.836863	0.332335	2.51813	0.0117981	0.519514	94.7466	169.827	1.79244	Not Sig	ENSMUSG00000113502	TEC	nonsignificant	predicted gene, 47411 [Source:MGI Symbol;Acc:MGI:6096346]
Mroh6	7.23003	2.5898	1.02838	2.51833	0.0117913	0.519514	2.08123	12.3788	5.94785	Not Sig	ENSMUSG00000098678	protein_coding	nonsignificant	maestro heat-like repeat family member 6 [Source:MGI Symbol;Acc:MGI:5011755]
Gm37064	56.3786	0.934573	0.371636	2.51476	0.0119115	0.521029	38.7553	74.0019	1.90946	Not Sig	ENSMUSG00000103803	TEC	nonsignificant	predicted gene, 37064 [Source:MGI Symbol;Acc:MGI:5610292]
Hsd11b1	1474.08	-0.281839	0.112162	-2.51279	0.0119779	0.521029	1617.4	1330.75	0.822774	Not Sig	ENSMUSG00000016194	protein_coding	nonsignificant	hydroxysteroid 11-beta dehydrogenase 1 [Source:MGI Symbol;Acc:MGI:103562]
Gm42692	330.478	0.449075	0.178654	2.51366	0.0119485	0.521029	280.047	380.908	1.36016	Not Sig	ENSMUSG00000104901	TEC	nonsignificant	predicted gene 42692 [Source:MGI Symbol;Acc:MGI:5662829]
Gm42896	147.221	0.62756	0.249741	2.51284	0.0119763	0.521029	115.334	179.107	1.55293	Not Sig	ENSMUSG00000107295	TEC	nonsignificant	predicted gene 42896 [Source:MGI Symbol;Acc:MGI:5663033]
Tpcn2	216.1	0.512158	0.20377	2.51341	0.0119571	0.521029	177.99	254.211	1.42823	Not Sig	ENSMUSG00000048677	protein_coding	nonsignificant	two pore segment channel 2 [Source:MGI Symbol;Acc:MGI:2385297]
Phactr2	2752.48	0.284432	0.113021	2.51662	0.0118486	0.521029	2481.7	3023.26	1.21822	Not Sig	ENSMUSG00000062866	protein_coding	nonsignificant	phosphatase and actin regulator 2 [Source:MGI Symbol;Acc:MGI:2446138]
Adam17	1469.63	0.219271	0.0872627	2.51277	0.0119789	0.521029	1358.2	1581.06	1.16409	Not Sig	ENSMUSG00000052593	protein_coding	nonsignificant	a disintegrin and metallopeptidase domain 17 [Source:MGI Symbol;Acc:MGI:1096335]
Spin1	15699.9	-0.163239	0.0649493	-2.51333	0.0119598	0.521029	16588.3	14811.4	0.892882	Not Sig	ENSMUSG00000021395	protein_coding	nonsignificant	spindlin 1 [Source:MGI Symbol;Acc:MGI:109242]
Gm18077	44.1182	1.05594	0.419792	2.51539	0.01189	0.521029	28.5476	59.6889	2.09086	Not Sig	ENSMUSG00000114312	processed_pseudogene	nonsignificant	predicted gene, 18077 [Source:MGI Symbol;Acc:MGI:5010262]
Tagln3	5455.16	-0.218887	0.0870972	-2.51313	0.0119666	0.521029	5869.89	5040.43	0.858692	Not Sig	ENSMUSG00000022658	protein_coding	nonsignificant	transgelin 3 [Source:MGI Symbol;Acc:MGI:1926784]
Gm38477	2.8699	-4.7878	1.90487	-2.51345	0.0119558	0.521029	5.73979	0	0	Not Sig	ENSMUSG00000116555	lncRNA	nonsignificant	predicted gene, 38477 [Source:MGI Symbol;Acc:MGI:5621362]
Gm45555	272.781	0.527337	0.210058	2.51044	0.0120581	0.523893	223.453	322.11	1.44151	Not Sig	ENSMUSG00000109652	TEC	nonsignificant	predicted gene 45555 [Source:MGI Symbol;Acc:MGI:5791391]
Gm11816	131.953	0.584377	0.2329	2.50913	0.012103	0.525258	105.346	158.559	1.50513	Not Sig	ENSMUSG00000086233	lncRNA	nonsignificant	predicted gene 11816 [Source:MGI Symbol;Acc:MGI:3650294]
Gm46123	932.503	0.775705	0.309305	2.50789	0.0121453	0.526512	687.369	1177.64	1.71326	Not Sig	ENSMUSG00000111443	lncRNA	nonsignificant	predicted gene, 46123 [Source:MGI Symbol;Acc:MGI:5825760]
Col9a3	727.315	1.0041	0.400695	2.50589	0.0122142	0.528913	483.899	970.732	2.00606	Not Sig	ENSMUSG00000027570	protein_coding	nonsignificant	collagen, type IX, alpha 3 [Source:MGI Symbol;Acc:MGI:894686]
Gsta2	6.91994	-2.91243	1.1629	-2.50446	0.0122639	0.530479	12.0764	1.76347	0.146026	Not Sig	ENSMUSG00000057933	protein_coding	nonsignificant	glutathione S-transferase, alpha 2 (Yc2) [Source:MGI Symbol;Acc:MGI:95863]
Gm3511	32.5913	1.10874	0.442851	2.50364	0.0122922	0.531117	20.7348	44.4478	2.14363	Not Sig	ENSMUSG00000105031	processed_pseudogene	nonsignificant	predicted gene 3511 [Source:MGI Symbol;Acc:MGI:3781688]
Six3	27.1671	1.4775	0.590354	2.50273	0.0123238	0.531895	14.3422	39.992	2.78841	Not Sig	ENSMUSG00000038805	protein_coding	nonsignificant	sine oculis-related homeobox 3 [Source:MGI Symbol;Acc:MGI:102764]
Gm44153	237.512	0.501185	0.200377	2.50121	0.012377	0.532797	196.115	278.91	1.42218	Not Sig	ENSMUSG00000108216	TEC	nonsignificant	predicted gene, 44153 [Source:MGI Symbol;Acc:MGI:5690545]
Arhgap25	190.675	-0.538946	0.215495	-2.50096	0.0123856	0.532797	226.051	155.299	0.68701	Not Sig	ENSMUSG00000030047	protein_coding	nonsignificant	Rho GTPase activating protein 25 [Source:MGI Symbol;Acc:MGI:2443687]
Cdr1os	56964.4	-0.224571	0.0897915	-2.50103	0.0123833	0.532797	61387.7	52541	0.855888	Not Sig	ENSMUSG00000071753	lncRNA	nonsignificant	cerebellar degeneration related antigen 1, opposite strand [Source:MGI Symbol;Acc:MGI:5637821]
Aars1	7283.06	-0.179463	0.0717919	-2.49977	0.0124275	0.534013	7736.12	6830.01	0.882874	Not Sig	ENSMUSG00000031960	protein_coding	nonsignificant	alanyl-tRNA synthetase 1 [Source:MGI Symbol;Acc:MGI:2384560]
Clstn3	14112.2	-0.191075	0.0764523	-2.49926	0.0124451	0.534186	15047	13177.4	0.875751	Not Sig	ENSMUSG00000008153	protein_coding	nonsignificant	calsyntenin 3 [Source:MGI Symbol;Acc:MGI:2178323]
Gm36933	73.0435	0.860451	0.34452	2.49753	0.0125061	0.534189	51.6512	94.4359	1.82834	Not Sig	ENSMUSG00000103772	TEC	nonsignificant	predicted gene, 36933 [Source:MGI Symbol;Acc:MGI:5610161]
Tmem132d	1443.78	-0.240726	0.0963668	-2.49802	0.0124889	0.534189	1563.4	1324.16	0.846972	Not Sig	ENSMUSG00000034310	protein_coding	nonsignificant	transmembrane protein 132D [Source:MGI Symbol;Acc:MGI:3044963]
A230056P14Rik	1171.19	-0.249334	0.0998297	-2.4976	0.0125038	0.534189	1271.23	1071.15	0.842611	Not Sig	ENSMUSG00000087178	lncRNA	nonsignificant	RIKEN cDNA A230056P14 gene [Source:MGI Symbol;Acc:MGI:2444856]
Gm47032	42.6236	1.25515	0.502591	2.49736	0.0125121	0.534189	25.1298	60.1173	2.39227	Not Sig	ENSMUSG00000111931	TEC	nonsignificant	predicted gene, 47032 [Source:MGI Symbol;Acc:MGI:6095728]
Kcne2	168.394	2.76531	1.10731	2.49732	0.0125134	0.534189	43.2405	293.548	6.78871	Not Sig	ENSMUSG00000039672	protein_coding	nonsignificant	potassium voltage-gated channel, Isk-related subfamily, gene 2 [Source:MGI Symbol;Acc:MGI:1891123]
Pip5kl1	134.366	-0.584196	0.234113	-2.49535	0.0125831	0.535412	160.694	108.037	0.672313	Not Sig	ENSMUSG00000046854	protein_coding	nonsignificant	phosphatidylinositol-4-phosphate 5-kinase-like 1 [Source:MGI Symbol;Acc:MGI:2448520]
Cd200	3913.09	-0.182198	0.0729965	-2.49598	0.0125608	0.535412	4160.76	3665.43	0.880952	Not Sig	ENSMUSG00000022661	protein_coding	nonsignificant	CD200 molecule [Source:MGI Symbol;Acc:MGI:1196990]
Gm50403	1451	0.912285	0.365573	2.4955	0.0125781	0.535412	1006.77	1895.22	1.88247	Not Sig	ENSMUSG00000117943	TEC	nonsignificant	predicted gene, 50403 [Source:MGI Symbol;Acc:MGI:6303316]
Gm6402	58.1831	0.975534	0.391085	2.49443	0.0126161	0.536232	39.3207	77.0454	1.95941	Not Sig	ENSMUSG00000117962	transcribed_processed_pseudogene	nonsignificant	predicted pseudogene 6402 [Source:MGI Symbol;Acc:MGI:3645740]
Gm16098	6.52794	-2.95428	1.18476	-2.49356	0.0126468	0.536371	11.5558	1.50011	0.129814	Not Sig	ENSMUSG00000086754	lncRNA	nonsignificant	predicted gene 16098 [Source:MGI Symbol;Acc:MGI:3801762]
Tmcc3os	92.495	0.691638	0.277362	2.49363	0.0126445	0.536371	70.7042	114.286	1.61639	Not Sig	ENSMUSG00000086269	lncRNA	nonsignificant	transmembrane and coiled coil domains 3, opposite strand [Source:MGI Symbol;Acc:MGI:3801736]
Btf3-ps17	2.4487	4.92653	1.97628	2.49283	0.012673	0.536505	0	4.8974	Inf	Not Sig	ENSMUSG00000101945	processed_pseudogene	nonsignificant	basic transcription factor 3, pseudogene 17 [Source:MGI Symbol;Acc:MGI:5579844]
Dennd2b	1743.37	0.241195	0.0967601	2.49271	0.0126773	0.536505	1599.14	1887.6	1.18038	Not Sig	ENSMUSG00000031024	protein_coding	nonsignificant	DENN domain containing 2B [Source:MGI Symbol;Acc:MGI:108517]
Gm37943	181.501	0.548832	0.22023	2.49209	0.0126994	0.536859	146.964	216.039	1.47001	Not Sig	ENSMUSG00000102960	TEC	nonsignificant	predicted gene, 37943 [Source:MGI Symbol;Acc:MGI:5611171]
Rsad2	98.6785	0.852396	0.342257	2.49052	0.0127557	0.538656	70.0461	127.311	1.81753	Not Sig	ENSMUSG00000020641	protein_coding	nonsignificant	radical S-adenosyl methionine domain containing 2 [Source:MGI Symbol;Acc:MGI:1929628]
Gucy1a1	2507	-0.221966	0.0892387	-2.48733	0.0128706	0.542388	2697.91	2316.08	0.85847	Not Sig	ENSMUSG00000033910	protein_coding	nonsignificant	guanylate cyclase 1, soluble, alpha 1 [Source:MGI Symbol;Acc:MGI:1926562]
Fam219a	4747.91	-0.195638	0.0786609	-2.4871	0.0128787	0.542388	5070.25	4425.58	0.872853	Not Sig	ENSMUSG00000028439	protein_coding	nonsignificant	family with sequence similarity 219, member A [Source:MGI Symbol;Acc:MGI:1919151]
Klhdc7a	1371.4	0.269702	0.108449	2.48691	0.0128856	0.542388	1242.8	1499.99	1.20694	Not Sig	ENSMUSG00000078234	protein_coding	nonsignificant	kelch domain containing 7A [Source:MGI Symbol;Acc:MGI:2444612]
Gm38062	258.186	0.558453	0.224685	2.48549	0.0129372	0.543974	208.624	307.748	1.47513	Not Sig	ENSMUSG00000104488	TEC	nonsignificant	predicted gene, 38062 [Source:MGI Symbol;Acc:MGI:5611290]
Gm10530	126.975	0.673454	0.271165	2.48356	0.0130076	0.546349	97.88	156.071	1.59451	Not Sig	ENSMUSG00000073528	lncRNA	nonsignificant	predicted gene 10530 [Source:MGI Symbol;Acc:MGI:3641765]
Shf	968.266	-0.30492	0.122848	-2.48209	0.0130616	0.548026	1070.01	866.519	0.809821	Not Sig	ENSMUSG00000033256	protein_coding	nonsignificant	Src homology 2 domain containing F [Source:MGI Symbol;Acc:MGI:3613669]
Gm6374	136.978	0.56929	0.229668	2.47875	0.0131843	0.548731	110.056	163.901	1.48925	Not Sig	ENSMUSG00000079140	processed_pseudogene	nonsignificant	predicted gene 6374 [Source:MGI Symbol;Acc:MGI:3647016]
Esrrg	1735.74	-0.212788	0.0857779	-2.48068	0.0131131	0.548731	1863.08	1608.41	0.863305	Not Sig	ENSMUSG00000026610	protein_coding	nonsignificant	estrogen-related receptor gamma [Source:MGI Symbol;Acc:MGI:1347056]
Gm13389	339.64	0.524372	0.211557	2.47863	0.0131889	0.548731	277.995	401.285	1.4435	Not Sig	ENSMUSG00000087079	lncRNA	nonsignificant	predicted gene 13389 [Source:MGI Symbol;Acc:MGI:3649902]
Tead1	4014.32	0.21543	0.0868649	2.48006	0.0131361	0.548731	3714.79	4313.85	1.16126	Not Sig	ENSMUSG00000055320	protein_coding	nonsignificant	TEA domain family member 1 [Source:MGI Symbol;Acc:MGI:101876]
Cyb5b	10530.8	-0.166264	0.0670411	-2.48003	0.0131371	0.548731	11138.2	9923.29	0.89092	Not Sig	ENSMUSG00000031924	protein_coding	nonsignificant	cytochrome b5 type B [Source:MGI Symbol;Acc:MGI:1913677]
Rwdd2a	857.437	-0.288179	0.116258	-2.4788	0.0131825	0.548731	944.059	770.816	0.816491	Not Sig	ENSMUSG00000032417	protein_coding	nonsignificant	RWD domain containing 2A [Source:MGI Symbol;Acc:MGI:1916769]
Phactr1	21333.8	-0.181226	0.0731168	-2.47858	0.0131905	0.548731	22672.8	19994.8	0.881886	Not Sig	ENSMUSG00000054728	protein_coding	nonsignificant	phosphatase and actin regulator 1 [Source:MGI Symbol;Acc:MGI:2659021]
Pcyt1a	1947.95	-0.21785	0.0878642	-2.47939	0.0131607	0.548731	2094.72	1801.18	0.859867	Not Sig	ENSMUSG00000005615	protein_coding	nonsignificant	phosphate cytidylyltransferase 1, choline, alpha isoform [Source:MGI Symbol;Acc:MGI:88557]
Cdr2	391.133	0.489912	0.197766	2.47724	0.0132404	0.550222	325.122	457.145	1.40607	Not Sig	ENSMUSG00000030878	protein_coding	nonsignificant	cerebellar degeneration-related 2 [Source:MGI Symbol;Acc:MGI:1100885]
Gm44679	1249.42	0.377208	0.152365	2.47568	0.0132984	0.551715	1086.14	1412.7	1.30067	Not Sig	ENSMUSG00000109320	TEC	nonsignificant	predicted gene 44679 [Source:MGI Symbol;Acc:MGI:5753255]
Oxr1	20571.2	-0.162271	0.0655505	-2.47551	0.0133045	0.551715	21727.3	19415.1	0.893581	Not Sig	ENSMUSG00000022307	protein_coding	nonsignificant	oxidation resistance 1 [Source:MGI Symbol;Acc:MGI:2179326]
Ocln	1016.88	0.263712	0.10656	2.47477	0.0133323	0.552281	923.847	1109.91	1.2014	Not Sig	ENSMUSG00000021638	protein_coding	nonsignificant	occludin [Source:MGI Symbol;Acc:MGI:106183]
Dynlrb1	4230.22	-0.176307	0.0712591	-2.47417	0.0133546	0.552621	4487.93	3972.51	0.885153	Not Sig	ENSMUSG00000047459	protein_coding	nonsignificant	dynein light chain roadblock-type 1 [Source:MGI Symbol;Acc:MGI:1914318]
Gm50384	200.058	0.577132	0.233342	2.47333	0.0133861	0.553341	160.44	239.676	1.49386	Not Sig	ENSMUSG00000117778	lncRNA	nonsignificant	predicted gene, 50384 [Source:MGI Symbol;Acc:MGI:6303284]
Uvssa	1248.59	0.267108	0.108087	2.47123	0.0134649	0.55601	1132.08	1365.1	1.20584	Not Sig	ENSMUSG00000037355	protein_coding	nonsignificant	UV stimulated scaffold protein A [Source:MGI Symbol;Acc:MGI:1918351]
Gm17747	15.3223	-1.69795	0.687512	-2.4697	0.0135226	0.557804	23.4368	7.20791	0.307547	Not Sig	ENSMUSG00000114232	lncRNA	nonsignificant	predicted gene, 17747 [Source:MGI Symbol;Acc:MGI:5009825]
Gm38505	25.6938	1.31986	0.534876	2.46761	0.013602	0.557957	14.6142	36.7734	2.51628	Not Sig	ENSMUSG00000092196	lncRNA	nonsignificant	predicted gene, 38505 [Source:MGI Symbol;Acc:MGI:5621390]
Gstm6	224.957	-0.512799	0.207727	-2.46862	0.0135634	0.557957	264.37	185.543	0.701829	Not Sig	ENSMUSG00000068762	protein_coding	nonsignificant	glutathione S-transferase, mu 6 [Source:MGI Symbol;Acc:MGI:1309467]
Adam18	41.4027	-1.30784	0.529701	-2.46901	0.0135487	0.557957	59.3398	23.4656	0.395445	Not Sig	ENSMUSG00000031552	protein_coding	nonsignificant	a disintegrin and metallopeptidase domain 18 [Source:MGI Symbol;Acc:MGI:105986]
Necab2	2660.25	-0.22404	0.0907824	-2.46788	0.0135917	0.557957	2866.43	2454.07	0.856144	Not Sig	ENSMUSG00000031837	protein_coding	nonsignificant	N-terminal EF-hand calcium binding protein 2 [Source:MGI Symbol;Acc:MGI:2152211]
Ccdc85c	3657.81	-0.320615	0.129943	-2.46735	0.0136118	0.557957	4064.3	3251.33	0.799971	Not Sig	ENSMUSG00000084883	protein_coding	nonsignificant	coiled-coil domain containing 85C [Source:MGI Symbol;Acc:MGI:3644008]
Gm48582	655.724	0.374564	0.151753	2.46824	0.0135778	0.557957	570.383	741.064	1.29924	Not Sig	ENSMUSG00000114501	TEC	nonsignificant	predicted gene, 48582 [Source:MGI Symbol;Acc:MGI:6098150]
Bglap3	41.3766	-1.05373	0.427228	-2.46645	0.0136461	0.558264	55.9861	26.7672	0.478105	Not Sig	ENSMUSG00000074489	protein_coding	nonsignificant	bone gamma-carboxyglutamate protein 3 [Source:MGI Symbol;Acc:MGI:88155]
Gm32014	423.331	0.474934	0.192594	2.46598	0.0136639	0.558264	353.352	493.309	1.39608	Not Sig	ENSMUSG00000111602	lncRNA	nonsignificant	predicted gene, 32014 [Source:MGI Symbol;Acc:MGI:5591173]
Mapk6	2816.97	-0.239317	0.0970585	-2.4657	0.0136745	0.558264	3048.99	2584.95	0.847804	Not Sig	ENSMUSG00000042688	protein_coding	nonsignificant	mitogen-activated protein kinase 6 [Source:MGI Symbol;Acc:MGI:1354946]
Gm18623	2.48071	4.94221	2.00442	2.46565	0.0136764	0.558264	0	4.96141	Inf	Not Sig	ENSMUSG00000112651	processed_pseudogene	nonsignificant	predicted gene, 18623 [Source:MGI Symbol;Acc:MGI:5010808]
Mir99ahg	3070.33	0.254512	0.103264	2.46467	0.0137138	0.559208	2798.8	3341.86	1.19403	Not Sig	ENSMUSG00000090386	lncRNA	nonsignificant	Mir99a and Mirlet7c-1 host gene (non-protein coding) [Source:MGI Symbol;Acc:MGI:1919929]
Gm37018	342.491	0.461045	0.187122	2.46387	0.0137448	0.559831	287.668	397.314	1.38116	Not Sig	ENSMUSG00000102950	TEC	nonsignificant	predicted gene, 37018 [Source:MGI Symbol;Acc:MGI:5610246]
Galnt13	2393.88	-0.282726	0.114797	-2.46282	0.0137848	0.559831	2629.11	2158.64	0.821054	Not Sig	ENSMUSG00000060988	protein_coding	nonsignificant	polypeptide N-acetylgalactosaminyltransferase 13 [Source:MGI Symbol;Acc:MGI:2139447]
Gm40309	496.946	0.338553	0.137468	2.46278	0.0137863	0.559831	438.29	555.603	1.26766	Not Sig	ENSMUSG00000107362	TEC	nonsignificant	predicted gene, 40309 [Source:MGI Symbol;Acc:MGI:5623194]
Gm32507	2.38468	4.89438	1.9871	2.46308	0.0137751	0.559831	0	4.76937	Inf	Not Sig	ENSMUSG00000110157	lncRNA	nonsignificant	predicted gene, 32507 [Source:MGI Symbol;Acc:MGI:5591666]
Nicn1	3142.89	-0.206094	0.0837157	-2.46183	0.013823	0.560743	3368.63	2917.15	0.865977	Not Sig	ENSMUSG00000032606	protein_coding	nonsignificant	nicolin 1 [Source:MGI Symbol;Acc:MGI:1913507]
Mndal	216.879	0.536611	0.218536	2.45548	0.0140696	0.560801	177.615	256.143	1.44213	Not Sig	ENSMUSG00000090272	protein_coding	nonsignificant	myeloid nuclear differentiation antigen like [Source:MGI Symbol;Acc:MGI:3780953]
Gm37814	664.34	0.886811	0.360776	2.45807	0.0139687	0.560801	466.195	862.485	1.85005	Not Sig	ENSMUSG00000102816	lncRNA	nonsignificant	predicted gene, 37814 [Source:MGI Symbol;Acc:MGI:5611042]
Sh2d3c	610.01	-0.326916	0.133115	-2.45589	0.0140537	0.560801	678.593	541.426	0.797866	Not Sig	ENSMUSG00000059013	protein_coding	nonsignificant	SH2 domain containing 3C [Source:MGI Symbol;Acc:MGI:1351631]
Spmip6	115.625	0.665568	0.271087	2.45518	0.0140814	0.560801	89.5415	141.708	1.58259	Not Sig	ENSMUSG00000028441	protein_coding	nonsignificant	sperm microtubule inner protein 6 [Source:MGI Symbol;Acc:MGI:1920971]
Hp1bp3	12968	-0.179142	0.0728937	-2.45758	0.0139875	0.560801	13772.3	12163.8	0.883205	Not Sig	ENSMUSG00000028759	protein_coding	nonsignificant	heterochromatin protein 1, binding protein 3 [Source:MGI Symbol;Acc:MGI:109369]
Steap2	1272.55	0.722538	0.294257	2.45546	0.0140702	0.560801	960.11	1585	1.65085	Not Sig	ENSMUSG00000015653	protein_coding	nonsignificant	six transmembrane epithelial antigen of prostate 2 [Source:MGI Symbol;Acc:MGI:1921301]
Miat	17676.1	0.210909	0.0859245	2.45458	0.0141048	0.560801	16384.3	18967.9	1.15769	Not Sig	ENSMUSG00000097767	lncRNA	nonsignificant	myocardial infarction associated transcript (non-protein coding) [Source:MGI Symbol;Acc:MGI:2444886]
Hspb8	509.869	0.335982	0.136868	2.45479	0.0140967	0.560801	451.691	568.047	1.2576	Not Sig	ENSMUSG00000041548	protein_coding	nonsignificant	heat shock protein 8 [Source:MGI Symbol;Acc:MGI:2135756]
Odad1	149.796	0.711336	0.289399	2.45797	0.0139723	0.560801	113.366	186.226	1.64269	Not Sig	ENSMUSG00000040189	protein_coding	nonsignificant	outer dynein arm docking complex subunit 1 [Source:MGI Symbol;Acc:MGI:2446120]
4931412I15Rik	95.9304	0.6765	0.274948	2.46047	0.0138756	0.560801	73.7208	118.14	1.60253	Not Sig	ENSMUSG00000108826	TEC	nonsignificant	RIKEN cDNA 4931412I15 gene [Source:MGI Symbol;Acc:MGI:1918245]
Gm44797	1059.25	0.846172	0.344595	2.45556	0.0140666	0.560801	757.178	1361.33	1.7979	Not Sig	ENSMUSG00000109359	TEC	nonsignificant	predicted gene 44797 [Source:MGI Symbol;Acc:MGI:5753373]
Ppp1r3b	128.073	0.695004	0.283012	2.45574	0.0140594	0.560801	97.7249	158.422	1.6211	Not Sig	ENSMUSG00000046794	protein_coding	nonsignificant	protein phosphatase 1, regulatory subunit 3B [Source:MGI Symbol;Acc:MGI:2177268]
Dnah9	3608	0.224476	0.0914359	2.45501	0.014088	0.560801	3327.42	3888.57	1.16864	Not Sig	ENSMUSG00000056752	protein_coding	nonsignificant	dynein, axonemal, heavy chain 9 [Source:MGI Symbol;Acc:MGI:1289279]
Sstr2	728.019	-0.2852	0.11619	-2.4546	0.014104	0.560801	799.536	656.501	0.821102	Not Sig	ENSMUSG00000047904	protein_coding	nonsignificant	somatostatin receptor 2 [Source:MGI Symbol;Acc:MGI:98328]
Gpx8	253.559	0.468956	0.190738	2.45864	0.0139464	0.560801	212.485	294.632	1.3866	Not Sig	ENSMUSG00000021760	protein_coding	nonsignificant	glutathione peroxidase 8 (putative) [Source:MGI Symbol;Acc:MGI:1916840]
Deptor	1603.79	-0.311677	0.12684	-2.45724	0.0140011	0.560801	1777.03	1430.55	0.805025	Not Sig	ENSMUSG00000022419	protein_coding	nonsignificant	DEP domain containing MTOR-interacting protein [Source:MGI Symbol;Acc:MGI:2146322]
St3gal1	1475.37	-0.287487	0.116948	-2.45825	0.0139614	0.560801	1623.42	1327.32	0.817604	Not Sig	ENSMUSG00000013846	protein_coding	nonsignificant	ST3 beta-galactoside alpha-2,3-sialyltransferase 1 [Source:MGI Symbol;Acc:MGI:98304]
Gm22146	98.7586	0.725101	0.295335	2.45518	0.0140813	0.560801	74.2863	123.231	1.65887	Not Sig	ENSMUSG00000117084	lncRNA	nonsignificant	predicted gene, 22146 [Source:MGI Symbol;Acc:MGI:5451923]
Zfp182	1281.39	0.253985	0.103329	2.45802	0.0139706	0.560801	1168.17	1394.6	1.19384	Not Sig	ENSMUSG00000054737	protein_coding	nonsignificant	zinc finger protein 182 [Source:MGI Symbol;Acc:MGI:2442220]
Ints6l	4827.11	0.264276	0.107673	2.45443	0.014111	0.560801	4385.21	5269.01	1.20154	Not Sig	ENSMUSG00000035967	protein_coding	nonsignificant	integrator complex subunit 6 like [Source:MGI Symbol;Acc:MGI:2442593]
Cpn1	10.1202	2.07884	0.847153	2.45392	0.014131	0.561027	3.90373	16.3366	4.18486	Not Sig	ENSMUSG00000025196	protein_coding	nonsignificant	carboxypeptidase N, polypeptide 1 [Source:MGI Symbol;Acc:MGI:2135874]
Gm47405	367.549	0.563155	0.229533	2.45349	0.0141479	0.56113	296.897	438.2	1.47593	Not Sig	ENSMUSG00000113680	lncRNA	nonsignificant	predicted gene, 47405 [Source:MGI Symbol;Acc:MGI:6096336]
Gm10599	6.37596	-4.21499	1.71878	-2.45232	0.0141938	0.562378	12.2049	0.547043	0.0448217	Not Sig	ENSMUSG00000118458	transcribed_unprocessed_pseudogene	nonsignificant	predicted pseudogene 10599 [Source:MGI Symbol;Acc:MGI:3710582]
Kcnj9	3915.61	-0.175782	0.0717849	-2.44874	0.0143359	0.565416	4153.57	3677.64	0.885417	Not Sig	ENSMUSG00000038026	protein_coding	nonsignificant	potassium inwardly-rectifying channel, subfamily J, member 9 [Source:MGI Symbol;Acc:MGI:108007]
Gm45719	198.012	0.592868	0.242023	2.44964	0.0142999	0.565416	157.719	238.304	1.51094	Not Sig	ENSMUSG00000108940	TEC	nonsignificant	predicted gene 45719 [Source:MGI Symbol;Acc:MGI:5804834]
Cdh13	2829.48	-0.219332	0.0895689	-2.44875	0.0143352	0.565416	3045.54	2613.41	0.858109	Not Sig	ENSMUSG00000031841	protein_coding	nonsignificant	cadherin 13 [Source:MGI Symbol;Acc:MGI:99551]
Gm19792	15.393	-1.74061	0.710776	-2.44889	0.0143296	0.565416	23.9027	6.88337	0.287974	Not Sig	ENSMUSG00000113495	lncRNA	nonsignificant	predicted gene, 19792 [Source:MGI Symbol;Acc:MGI:5011977]
Glis3	1701.08	0.269905	0.11023	2.44856	0.0143427	0.565416	1542.87	1859.29	1.20509	Not Sig	ENSMUSG00000052942	protein_coding	nonsignificant	GLIS family zinc finger 3 [Source:MGI Symbol;Acc:MGI:2444289]
Rps7	5533.86	-0.193336	0.0789836	-2.44779	0.0143734	0.566056	5905.76	5161.97	0.874058	Not Sig	ENSMUSG00000061477	protein_coding	nonsignificant	ribosomal protein S7 [Source:MGI Symbol;Acc:MGI:1333818]
Gm42993	1526.58	0.73252	0.2995	2.44581	0.0144527	0.568158	1147.1	1906.06	1.66163	Not Sig	ENSMUSG00000105985	TEC	nonsignificant	predicted gene 42993 [Source:MGI Symbol;Acc:MGI:5663130]
Ttc9b	876.152	-0.323757	0.132376	-2.44573	0.0144558	0.568158	975.597	776.706	0.796134	Not Sig	ENSMUSG00000007944	protein_coding	nonsignificant	tetratricopeptide repeat domain 9B [Source:MGI Symbol;Acc:MGI:1920282]
Gm24729	19.7828	1.56901	0.641639	2.44531	0.0144726	0.56825	10.0135	29.5521	2.95122	Not Sig	ENSMUSG00000088850	snoRNA	nonsignificant	predicted gene, 24729 [Source:MGI Symbol;Acc:MGI:5454506]
Gm18422	206.168	0.559269	0.228826	2.44408	0.0145223	0.569347	166.624	245.712	1.47465	Not Sig	ENSMUSG00000108269	transcribed_processed_pseudogene	nonsignificant	predicted gene, 18422 [Source:MGI Symbol;Acc:MGI:5010607]
Zfp975	740.834	0.286329	0.117196	2.44317	0.0145587	0.569347	666.778	814.89	1.22213	Not Sig	ENSMUSG00000069727	protein_coding	nonsignificant	zinc finger protein 975 [Source:MGI Symbol;Acc:MGI:3648690]
9330162G02Rik	16776.8	0.285871	0.117006	2.44321	0.0145574	0.569347	15119	18434.5	1.2193	Not Sig	ENSMUSG00000109536	TEC	nonsignificant	RIKEN cDNA 9330162G02 gene [Source:MGI Symbol;Acc:MGI:2442217]
Gm49268	69.1476	0.986635	0.403769	2.44357	0.0145429	0.569347	46.4234	91.8717	1.979	Not Sig	ENSMUSG00000115131	TEC	nonsignificant	predicted gene, 49268 [Source:MGI Symbol;Acc:MGI:6118748]
Gm48948	57.4537	0.936178	0.383346	2.44212	0.0146013	0.57044	39.3007	75.6067	1.9238	Not Sig	ENSMUSG00000115228	TEC	nonsignificant	predicted gene, 48948 [Source:MGI Symbol;Acc:MGI:6118272]
Gm37033	182.905	0.539287	0.221047	2.4397	0.0146996	0.573709	148.987	216.823	1.45531	Not Sig	ENSMUSG00000104388	TEC	nonsignificant	predicted gene, 37033 [Source:MGI Symbol;Acc:MGI:5610261]
Fign	221.139	-0.472889	0.193961	-2.43806	0.0147664	0.574072	257.502	184.776	0.71757	Not Sig	ENSMUSG00000075324	protein_coding	nonsignificant	fidgetin [Source:MGI Symbol;Acc:MGI:1890647]
Gm43874	665.536	0.443821	0.182046	2.43797	0.0147702	0.574072	563.218	767.855	1.36334	Not Sig	ENSMUSG00000107779	TEC	nonsignificant	predicted gene, 43874 [Source:MGI Symbol;Acc:MGI:5690266]
Podxl2	1800.07	-0.220312	0.0903735	-2.4378	0.0147771	0.574072	1938.57	1661.56	0.857106	Not Sig	ENSMUSG00000033152	protein_coding	nonsignificant	podocalyxin-like 2 [Source:MGI Symbol;Acc:MGI:2442488]
Vps11	2997.68	-0.209292	0.0858574	-2.43767	0.0147822	0.574072	3214.8	2780.56	0.864924	Not Sig	ENSMUSG00000032127	protein_coding	nonsignificant	VPS11, CORVET/HOPS core subunit [Source:MGI Symbol;Acc:MGI:1918982]
Gm48207	47.6587	1.03108	0.422932	2.43793	0.0147717	0.574072	31.3679	63.9494	2.03869	Not Sig	ENSMUSG00000112571	TEC	nonsignificant	predicted gene, 48207 [Source:MGI Symbol;Acc:MGI:6097599]
Rbm47	290.291	1.65849	0.681136	2.43488	0.0148965	0.574962	139.704	440.878	3.1558	Not Sig	ENSMUSG00000070780	protein_coding	nonsignificant	RNA binding motif protein 47 [Source:MGI Symbol;Acc:MGI:2384294]
Fras1	3607.17	0.189538	0.0778321	2.43521	0.0148832	0.574962	3369.66	3844.69	1.14097	Not Sig	ENSMUSG00000034687	protein_coding	nonsignificant	Fraser extracellular matrix complex subunit 1 [Source:MGI Symbol;Acc:MGI:2385368]
Sparcl1	77910	-0.16302	0.06694	-2.43531	0.0148788	0.574962	82307.3	73512.7	0.89315	Not Sig	ENSMUSG00000029309	protein_coding	nonsignificant	SPARC-like 1 [Source:MGI Symbol;Acc:MGI:108110]
Irgq	5879.49	-0.190083	0.0780216	-2.43629	0.0148389	0.574962	6266.99	5492	0.876337	Not Sig	ENSMUSG00000041037	protein_coding	nonsignificant	immunity-related GTPase family, Q [Source:MGI Symbol;Acc:MGI:2667176]
Gm48727	43.9107	0.984838	0.404453	2.43499	0.0148923	0.574962	29.3411	58.4802	1.99312	Not Sig	ENSMUSG00000111731	lncRNA	nonsignificant	predicted gene, 48727 [Source:MGI Symbol;Acc:MGI:6098386]
Rcan1	1928.47	-0.207108	0.0850469	-2.43522	0.0148827	0.574962	2067.52	1789.42	0.865492	Not Sig	ENSMUSG00000022951	protein_coding	nonsignificant	regulator of calcineurin 1 [Source:MGI Symbol;Acc:MGI:1890564]
Mtcl1	3183.65	-0.19987	0.0820953	-2.43461	0.014908	0.574962	3404.5	2962.81	0.870262	Not Sig	ENSMUSG00000052105	protein_coding	nonsignificant	microtubule crosslinking factor 1 [Source:MGI Symbol;Acc:MGI:1915867]
Cplx1	18684.1	-0.178998	0.0736351	-2.43089	0.015062	0.579241	19842.9	17525.3	0.883204	Not Sig	ENSMUSG00000033615	protein_coding	nonsignificant	complexin 1 [Source:MGI Symbol;Acc:MGI:104727]
Tgfbi	201.609	0.599389	0.246575	2.43085	0.0150633	0.579241	160.165	243.054	1.51753	Not Sig	ENSMUSG00000035493	protein_coding	nonsignificant	transforming growth factor, beta induced [Source:MGI Symbol;Acc:MGI:99959]
Cldn2	282.534	2.51841	1.03591	2.4311	0.0150529	0.579241	84.0167	481.052	5.72567	Not Sig	ENSMUSG00000047230	protein_coding	nonsignificant	claudin 2 [Source:MGI Symbol;Acc:MGI:1276110]
6330419E04Rik	480.031	0.509352	0.209635	2.42971	0.0151109	0.580503	395.331	564.731	1.4285	Not Sig	ENSMUSG00000107414	TEC	nonsignificant	RIKEN cDNA 6330419E04 gene [Source:MGI Symbol;Acc:MGI:1918013]
Nceh1	9272.22	-0.168529	0.0694282	-2.42739	0.0152078	0.583079	9812.63	8731.81	0.889854	Not Sig	ENSMUSG00000027698	protein_coding	nonsignificant	neutral cholesterol ester hydrolase 1 [Source:MGI Symbol;Acc:MGI:2443191]
Gm42540	111.462	0.707352	0.29137	2.42768	0.0151958	0.583079	84.3538	138.571	1.64274	Not Sig	ENSMUSG00000106500	TEC	nonsignificant	predicted gene 42540 [Source:MGI Symbol;Acc:MGI:5662677]
Gm37258	254.398	0.431655	0.177893	2.42649	0.0152458	0.583525	216.237	292.56	1.35296	Not Sig	ENSMUSG00000102760	TEC	nonsignificant	predicted gene, 37258 [Source:MGI Symbol;Acc:MGI:5610486]
Dync1i1	6266.89	-0.175039	0.0721508	-2.42602	0.0152653	0.583525	6647.17	5886.61	0.88558	Not Sig	ENSMUSG00000029757	protein_coding	nonsignificant	dynein cytoplasmic 1 intermediate chain 1 [Source:MGI Symbol;Acc:MGI:107743]
Pou6f1	5111.23	-0.216561	0.0892779	-2.4257	0.015279	0.583525	5494.59	4727.87	0.860458	Not Sig	ENSMUSG00000009739	protein_coding	nonsignificant	POU domain, class 6, transcription factor 1 [Source:MGI Symbol;Acc:MGI:102935]
Lgals12	34.7243	1.12406	0.463273	2.42635	0.0152514	0.583525	21.6814	47.7671	2.20314	Not Sig	ENSMUSG00000024972	protein_coding	nonsignificant	lectin, galactose binding, soluble 12 [Source:MGI Symbol;Acc:MGI:1929094]
Gm38057	324.902	0.386752	0.159535	2.42424	0.0153404	0.584726	281.311	368.493	1.30991	Not Sig	ENSMUSG00000102143	TEC	nonsignificant	predicted gene, 38057 [Source:MGI Symbol;Acc:MGI:5611285]
Frs3	460.451	-0.329012	0.135714	-2.4243	0.0153379	0.584726	512.517	408.384	0.79682	Not Sig	ENSMUSG00000023266	protein_coding	nonsignificant	fibroblast growth factor receptor substrate 3 [Source:MGI Symbol;Acc:MGI:2135965]
Acyp2	510.17	0.338387	0.13965	2.42312	0.015388	0.585402	450.403	569.937	1.26539	Not Sig	ENSMUSG00000060923	protein_coding	nonsignificant	acylphosphatase 2, muscle type [Source:MGI Symbol;Acc:MGI:1922822]
Slc16a8	53.1737	0.965646	0.398472	2.42337	0.0153771	0.585402	35.7528	70.5947	1.97453	Not Sig	ENSMUSG00000032988	protein_coding	nonsignificant	solute carrier family 16 (monocarboxylic acid transporters), member 8 [Source:MGI Symbol;Acc:MGI:1929519]
Gm47987	624.692	0.460243	0.190182	2.42001	0.0155199	0.589846	525.19	724.194	1.37892	Not Sig	ENSMUSG00000113698	TEC	nonsignificant	predicted gene, 47987 [Source:MGI Symbol;Acc:MGI:6097278]
Gm42972	784.459	0.789272	0.326399	2.41812	0.0156011	0.591209	574.988	993.931	1.72861	Not Sig	ENSMUSG00000105445	TEC	nonsignificant	predicted gene 42972 [Source:MGI Symbol;Acc:MGI:5663109]
Gm45153	172.766	0.535648	0.221498	2.41829	0.0155935	0.591209	140.809	204.723	1.45391	Not Sig	ENSMUSG00000108693	TEC	nonsignificant	predicted gene 45153 [Source:MGI Symbol;Acc:MGI:5753729]
Slc13a5	368.768	-0.399897	0.165328	-2.41881	0.0155714	0.591209	420.549	316.986	0.753745	Not Sig	ENSMUSG00000020805	protein_coding	nonsignificant	solute carrier family 13 (sodium-dependent citrate transporter), member 5 [Source:MGI Symbol;Acc:MGI:3037150]
Gm43487	208.637	0.601399	0.248776	2.41744	0.0156303	0.591745	165.379	251.895	1.52314	Not Sig	ENSMUSG00000105683	TEC	nonsignificant	predicted gene 43487 [Source:MGI Symbol;Acc:MGI:5663624]
Ssxb5	14.0378	1.7109	0.708801	2.41379	0.0157876	0.597123	6.60011	21.4754	3.25379	Not Sig	ENSMUSG00000071816	protein_coding	nonsignificant	SSX member B5 [Source:MGI Symbol;Acc:MGI:2446774]
	1331.9	0.352263	0.145996	2.41283	0.0158292	0.598118	1169.1	1494.71	1.2785	Not Sig	ENSMUSG00000104362		nonsignificant
Hdgfl3	8696.47	-0.170745	0.0708012	-2.41162	0.015882	0.599061	9209.65	8183.28	0.888555	Not Sig	ENSMUSG00000025104	protein_coding	nonsignificant	HDGF like 3 [Source:MGI Symbol;Acc:MGI:1352760]
Cpne5	1197.57	-0.275281	0.114151	-2.41155	0.0158848	0.599061	1311.01	1084.13	0.826943	Not Sig	ENSMUSG00000024008	protein_coding	nonsignificant	copine V [Source:MGI Symbol;Acc:MGI:2385908]
Ntsr1	227.437	-0.544083	0.225767	-2.40993	0.0159557	0.599529	269.563	185.311	0.687449	Not Sig	ENSMUSG00000027568	protein_coding	nonsignificant	neurotensin receptor 1 [Source:MGI Symbol;Acc:MGI:97386]
Nek5	63.5588	1.03287	0.428458	2.41068	0.015923	0.599529	41.6642	85.4533	2.051	Not Sig	ENSMUSG00000037738	protein_coding	nonsignificant	NIMA (never in mitosis gene a)-related expressed kinase 5 [Source:MGI Symbol;Acc:MGI:2142824]
Gm12035	26.1105	1.30694	0.542276	2.4101	0.0159483	0.599529	15.1031	37.118	2.45764	Not Sig	ENSMUSG00000083555	processed_pseudogene	nonsignificant	predicted gene 12035 [Source:MGI Symbol;Acc:MGI:3651599]
Runx2os2	82.9321	0.704703	0.292424	2.40986	0.0159585	0.599529	62.9503	102.914	1.63484	Not Sig	ENSMUSG00000089849	lncRNA	nonsignificant	runt related transcription factor 2, opposite strand 2 [Source:MGI Symbol;Acc:MGI:1926132]
Nova1	3420.8	-0.18855	0.0782524	-2.40951	0.0159738	0.599531	3642.73	3198.87	0.878153	Not Sig	ENSMUSG00000021047	protein_coding	nonsignificant	NOVA alternative splicing regulator 1 [Source:MGI Symbol;Acc:MGI:104297]
Gm19410	1704.22	-0.251783	0.104572	-2.40775	0.0160513	0.601286	1851.63	1556.8	0.840773	Not Sig	ENSMUSG00000109372	protein_coding	nonsignificant	predicted gene, 19410 [Source:MGI Symbol;Acc:MGI:5011595]
Dock6	944.048	0.261541	0.108617	2.40792	0.0160436	0.601286	857.835	1030.26	1.201	Not Sig	ENSMUSG00000032198	protein_coding	nonsignificant	dedicator of cytokinesis 6 [Source:MGI Symbol;Acc:MGI:1914789]
Gm49674	1590.29	0.368819	0.153211	2.40725	0.016073	0.601522	1386.93	1793.65	1.29325	Not Sig	ENSMUSG00000116881	TEC	nonsignificant	predicted gene, 49674 [Source:MGI Symbol;Acc:MGI:6215119]
Ankrd34a	1962.8	-0.251617	0.104615	-2.40518	0.0161646	0.601565	2133.42	1792.19	0.840054	Not Sig	ENSMUSG00000049097	protein_coding	nonsignificant	ankyrin repeat domain 34A [Source:MGI Symbol;Acc:MGI:3617846]
Gm43831	130.026	0.66418	0.276129	2.40533	0.016158	0.601565	100.267	159.785	1.59359	Not Sig	ENSMUSG00000105653	TEC	nonsignificant	predicted gene 43831 [Source:MGI Symbol;Acc:MGI:5663968]
Gm19932	331.514	0.521789	0.216893	2.40574	0.0161396	0.601565	271.504	391.524	1.44205	Not Sig	ENSMUSG00000093490	processed_pseudogene	nonsignificant	predicted gene, 19932 [Source:MGI Symbol;Acc:MGI:5012117]
Gm45223	866.512	0.333931	0.138759	2.40656	0.0161037	0.601565	765.594	967.431	1.26363	Not Sig	ENSMUSG00000109429	TEC	nonsignificant	predicted gene 45223 [Source:MGI Symbol;Acc:MGI:5753799]
Gm45222	593.156	0.386567	0.160744	2.40486	0.0161786	0.601565	513.418	672.894	1.31061	Not Sig	ENSMUSG00000109498	TEC	nonsignificant	predicted gene 45222 [Source:MGI Symbol;Acc:MGI:5753798]
Nupr1	98.5642	-0.631343	0.262535	-2.40479	0.0161817	0.601565	119.667	77.4616	0.64731	Not Sig	ENSMUSG00000030717	protein_coding	nonsignificant	nuclear protein transcription regulator 1 [Source:MGI Symbol;Acc:MGI:1891834]
Gm14776	203.641	0.526285	0.21879	2.40544	0.0161532	0.601565	166.434	240.848	1.44711	Not Sig	ENSMUSG00000083421	processed_pseudogene	nonsignificant	predicted gene 14776 [Source:MGI Symbol;Acc:MGI:3705559]
Gm45737	42.4005	0.981825	0.408408	2.40403	0.0162154	0.60204	28.6959	56.105	1.95516	Not Sig	ENSMUSG00000109231	TEC	nonsignificant	predicted gene 45737 [Source:MGI Symbol;Acc:MGI:5804852]
Rhod	28.0627	1.19697	0.497945	2.40381	0.0162252	0.60204	16.9514	39.1739	2.31095	Not Sig	ENSMUSG00000041845	protein_coding	nonsignificant	ras homolog family member D [Source:MGI Symbol;Acc:MGI:108446]
Gm48003	70.4985	0.934601	0.388938	2.40296	0.0162632	0.602306	48.4033	92.5936	1.91296	Not Sig	ENSMUSG00000114704	lncRNA	nonsignificant	predicted gene, 48003 [Source:MGI Symbol;Acc:MGI:6097304]
Gm27153	77.3895	0.906617	0.377288	2.40299	0.0162618	0.602306	53.913	100.866	1.87091	Not Sig	ENSMUSG00000099013	lncRNA	nonsignificant	predicted gene 27153 [Source:MGI Symbol;Acc:MGI:5520996]
Gm5862	72.8275	0.828082	0.344769	2.40185	0.0163126	0.602997	52.7376	92.9174	1.76188	Not Sig	ENSMUSG00000067700	protein_coding	nonsignificant	predicted gene 5862 [Source:MGI Symbol;Acc:MGI:3645135]
Sez6	9498.66	-0.203358	0.0846646	-2.40192	0.0163093	0.602997	10168.9	8828.42	0.868179	Not Sig	ENSMUSG00000000632	protein_coding	nonsignificant	seizure related gene 6 [Source:MGI Symbol;Acc:MGI:104745]
Pafah1b2	13591.8	-0.157676	0.0656922	-2.40023	0.0163849	0.603957	14334.8	12848.8	0.896341	Not Sig	ENSMUSG00000003131	protein_coding	nonsignificant	platelet-activating factor acetylhydrolase, isoform 1b, subunit 2 [Source:MGI Symbol;Acc:MGI:108415]
Lingo1	8993.49	-0.201607	0.0839762	-2.40077	0.0163606	0.603957	9621.08	8365.89	0.869537	Not Sig	ENSMUSG00000049556	protein_coding	nonsignificant	leucine rich repeat and Ig domain containing 1 [Source:MGI Symbol;Acc:MGI:1915522]
Gm50250	166.724	0.669982	0.279101	2.4005	0.0163727	0.603957	128.354	205.093	1.59787	Not Sig	ENSMUSG00000117835	lncRNA	nonsignificant	predicted gene, 50250 [Source:MGI Symbol;Acc:MGI:6303065]
Atmin	3729.15	-0.1889	0.0787195	-2.39965	0.0164105	0.604334	3973.93	3484.36	0.876804	Not Sig	ENSMUSG00000047388	protein_coding	nonsignificant	ATM interactor [Source:MGI Symbol;Acc:MGI:2682328]
	2.62927	-4.66596	1.94586	-2.39789	0.0164896	0.605036	5.25855	0	0	Not Sig	ENSMUSG00000109917		nonsignificant
Gm26520	39.3192	-1.07657	0.448971	-2.39785	0.0164914	0.605036	53.3961	25.2423	0.472737	Not Sig	ENSMUSG00000097429	lncRNA	nonsignificant	predicted gene, 26520 [Source:MGI Symbol;Acc:MGI:5477014]
Gm37311	535.9	0.393513	0.16411	2.39787	0.0164909	0.605036	462.835	608.965	1.31573	Not Sig	ENSMUSG00000103049	TEC	nonsignificant	predicted gene, 37311 [Source:MGI Symbol;Acc:MGI:5610539]
Gm50151	204.67	0.530213	0.22105	2.39861	0.0164575	0.605036	167.215	242.125	1.44799	Not Sig	ENSMUSG00000117897	TEC	nonsignificant	predicted gene, 50151 [Source:MGI Symbol;Acc:MGI:6302908]
Gm14388	22.0342	1.34568	0.561465	2.39673	0.0165419	0.606321	12.5027	31.5657	2.52471	Not Sig	ENSMUSG00000084230	processed_pseudogene	nonsignificant	predicted gene 14388 [Source:MGI Symbol;Acc:MGI:3650926]
Rassf2	3445	-0.18954	0.0790982	-2.39626	0.0165634	0.60654	3672.11	3217.9	0.876307	Not Sig	ENSMUSG00000027339	protein_coding	nonsignificant	Ras association (RalGDS/AF-6) domain family member 2 [Source:MGI Symbol;Acc:MGI:2442060]
1700025N21Rik	36.6138	1.119	0.467152	2.39536	0.0166041	0.607462	23.0424	50.1851	2.17795	Not Sig	ENSMUSG00000090200	lncRNA	nonsignificant	RIKEN cDNA 1700025N21 gene [Source:MGI Symbol;Acc:MGI:1916665]
Col24a1	73.67	-0.735412	0.307133	-2.39444	0.0166459	0.607853	92.1556	55.1843	0.598816	Not Sig	ENSMUSG00000028197	protein_coding	nonsignificant	collagen, type XXIV, alpha 1 [Source:MGI Symbol;Acc:MGI:1918605]
Gm3145	9.2984	2.24157	0.936093	2.3946	0.0166385	0.607853	3.22912	15.3677	4.75908	Not Sig	ENSMUSG00000099797	processed_pseudogene	nonsignificant	predicted gene 3145 [Source:MGI Symbol;Acc:MGI:3781324]
Gm19938	978.929	0.395892	0.165481	2.39238	0.0167396	0.608398	844.547	1113.31	1.31824	Not Sig	ENSMUSG00000102331	lncRNA	nonsignificant	predicted gene, 19938 [Source:MGI Symbol;Acc:MGI:5012123]
Gm38223	26.9059	1.22496	0.512458	2.39036	0.0168317	0.608398	16.1918	37.6199	2.32339	Not Sig	ENSMUSG00000102639	TEC	nonsignificant	predicted gene, 38223 [Source:MGI Symbol;Acc:MGI:5611451]
Gm13398	4.19624	3.77445	1.57875	2.39078	0.0168124	0.608398	0.563346	7.82913	13.8975	Not Sig	ENSMUSG00000087364	protein_coding	nonsignificant	predicted gene 13398 [Source:MGI Symbol;Acc:MGI:3652315]
Gpr153	352.485	-0.433104	0.181187	-2.39038	0.0168311	0.608398	405.538	299.431	0.738356	Not Sig	ENSMUSG00000042804	protein_coding	nonsignificant	G protein-coupled receptor 153 [Source:MGI Symbol;Acc:MGI:1916157]
Chd5	16966.9	-0.202447	0.0846592	-2.39132	0.016788	0.608398	18157.9	15776	0.86882	Not Sig	ENSMUSG00000005045	protein_coding	nonsignificant	chromodomain helicase DNA binding protein 5 [Source:MGI Symbol;Acc:MGI:3036258]
Gm42617	281.664	0.608586	0.25449	2.3914	0.0167842	0.608398	222.963	340.365	1.52656	Not Sig	ENSMUSG00000104919	TEC	nonsignificant	predicted gene 42617 [Source:MGI Symbol;Acc:MGI:5662754]
Gm26852	108.665	0.602895	0.251909	2.3933	0.0166975	0.608398	86.0842	131.245	1.52461	Not Sig	ENSMUSG00000097231	lncRNA	nonsignificant	predicted gene, 26852 [Source:MGI Symbol;Acc:MGI:5477346]
Septin10	435.381	0.346253	0.144747	2.39213	0.0167508	0.608398	382.873	487.888	1.27428	Not Sig	ENSMUSG00000019917	protein_coding	nonsignificant	septin 10 [Source:MGI Symbol;Acc:MGI:1918110]
Gm11627	79.3413	-0.767511	0.320978	-2.39117	0.0167949	0.608398	100.453	58.2292	0.579664	Not Sig	ENSMUSG00000078640	lncRNA	nonsignificant	predicted gene 11627 [Source:MGI Symbol;Acc:MGI:3650659]
4930480K15Rik	728.397	0.44352	0.185479	2.39122	0.0167925	0.608398	616.306	840.489	1.36375	Not Sig	ENSMUSG00000090160	lncRNA	nonsignificant	RIKEN cDNA 4930480K15 gene [Source:MGI Symbol;Acc:MGI:1926050]
Pacs1	4128.26	-0.175966	0.0735522	-2.3924	0.0167385	0.608398	4380.98	3875.54	0.88463	Not Sig	ENSMUSG00000024855	protein_coding	nonsignificant	phosphofurin acidic cluster sorting protein 1 [Source:MGI Symbol;Acc:MGI:1277113]
Apob	32.1959	1.29593	0.54226	2.38987	0.0168544	0.608656	18.5465	45.8453	2.47192	Not Sig	ENSMUSG00000020609	protein_coding	nonsignificant	apolipoprotein B [Source:MGI Symbol;Acc:MGI:88052]
Gm2150	3.25794	4.29588	1.79853	2.38855	0.0169149	0.610277	0.274023	6.24185	22.7786	Not Sig	ENSMUSG00000114992	processed_pseudogene	nonsignificant	predicted gene 2150 [Source:MGI Symbol;Acc:MGI:3780319]
Eno2	34011.7	-0.179378	0.0751256	-2.38771	0.0169536	0.611109	36124.4	31899	0.88303	Not Sig	ENSMUSG00000004267	protein_coding	nonsignificant	enolase 2, gamma neuronal [Source:MGI Symbol;Acc:MGI:95394]
Gm26901	159.586	0.50776	0.212833	2.38572	0.0170458	0.612769	131.604	187.569	1.42525	Not Sig	ENSMUSG00000097797	lncRNA	nonsignificant	predicted gene, 26901 [Source:MGI Symbol;Acc:MGI:5477395]
Sgk3	1092.74	0.280847	0.117716	2.3858	0.017042	0.612769	986.289	1199.2	1.21587	Not Sig	ENSMUSG00000025915	protein_coding	nonsignificant	serum/glucocorticoid regulated kinase 3 [Source:MGI Symbol;Acc:MGI:2182368]
Gm37792	267.956	0.583162	0.244595	2.3842	0.0171164	0.612769	214.342	321.57	1.50027	Not Sig	ENSMUSG00000102321	TEC	nonsignificant	predicted gene, 37792 [Source:MGI Symbol;Acc:MGI:5611020]
Gm15675	51.6807	0.958997	0.402585	2.3821	0.0172143	0.612769	34.9855	68.3758	1.9544	Not Sig	ENSMUSG00000086825	lncRNA	nonsignificant	predicted gene 15675 [Source:MGI Symbol;Acc:MGI:3783117]
Gm43162	166.374	0.564865	0.236884	2.38456	0.0170994	0.612769	133.839	198.908	1.48617	Not Sig	ENSMUSG00000104724	TEC	nonsignificant	predicted gene 43162 [Source:MGI Symbol;Acc:MGI:5663299]
Dhrs3	744.094	0.284287	0.119314	2.38268	0.0171869	0.612769	671.689	816.5	1.21559	Not Sig	ENSMUSG00000066026	protein_coding	nonsignificant	dehydrogenase/reductase 3 [Source:MGI Symbol;Acc:MGI:1315215]
Sema3b	170.062	0.701322	0.294374	2.38242	0.0171994	0.612769	129.601	210.523	1.6244	Not Sig	ENSMUSG00000057969	protein_coding	nonsignificant	sema domain, immunoglobulin domain (Ig), short basic domain, secreted, (semaphorin) 3B [Source:MGI Symbol;Acc:MGI:107561]
Uqcrc1	6515.29	-0.196415	0.0823618	-2.38478	0.0170892	0.612769	6959.63	6070.95	0.87231	Not Sig	ENSMUSG00000025651	protein_coding	nonsignificant	ubiquinol-cytochrome c reductase core protein 1 [Source:MGI Symbol;Acc:MGI:107876]
Gm15647	10.473	1.91135	0.801171	2.38569	0.017047	0.612769	4.36347	16.5825	3.8003	Not Sig	ENSMUSG00000090212	lncRNA	nonsignificant	predicted gene 15647 [Source:MGI Symbol;Acc:MGI:3783091]
Coro6	813.997	-0.297872	0.12504	-2.38221	0.0172088	0.612769	897.687	730.306	0.813542	Not Sig	ENSMUSG00000020836	protein_coding	nonsignificant	coronin 6 [Source:MGI Symbol;Acc:MGI:2183448]
Hmga1b	256.106	-0.557568	0.233836	-2.38444	0.0171053	0.612769	304.977	207.235	0.679511	Not Sig	ENSMUSG00000078249	protein_coding	nonsignificant	high mobility group AT-hook 1B [Source:MGI Symbol;Acc:MGI:96161]
Gm49260	90.2688	0.63443	0.266129	2.38392	0.0171295	0.612769	70.7	109.838	1.55357	Not Sig	ENSMUSG00000115264	TEC	nonsignificant	predicted gene, 49260 [Source:MGI Symbol;Acc:MGI:6118734]
Enpp5	13739.9	-0.150219	0.0630365	-2.38305	0.01717	0.612769	14454.9	13024.8	0.901065	Not Sig	ENSMUSG00000023960	protein_coding	nonsignificant	ectonucleotide pyrophosphatase/phosphodiesterase 5 [Source:MGI Symbol;Acc:MGI:1933830]
Sfxn3	4011.28	-0.182526	0.0766273	-2.382	0.0172188	0.612769	4265.36	3757.19	0.880862	Not Sig	ENSMUSG00000025212	protein_coding	nonsignificant	sideroflexin 3 [Source:MGI Symbol;Acc:MGI:2137679]
Gm37537	127.447	0.590976	0.248338	2.37972	0.0173256	0.61325	101.809	153.085	1.50365	Not Sig	ENSMUSG00000103420	TEC	nonsignificant	predicted gene, 37537 [Source:MGI Symbol;Acc:MGI:5610765]
Steap1	74.4297	2.31465	0.972042	2.38122	0.0172553	0.61325	24.9468	123.913	4.96707	Not Sig	ENSMUSG00000015652	protein_coding	nonsignificant	six transmembrane epithelial antigen of the prostate 1 [Source:MGI Symbol;Acc:MGI:1917608]
Gm44235	775.423	0.431752	0.181415	2.37991	0.0173168	0.61325	659.802	891.044	1.35047	Not Sig	ENSMUSG00000107917	TEC	nonsignificant	predicted gene, 44235 [Source:MGI Symbol;Acc:MGI:5690627]
Gm47078	2.65972	-4.68841	1.97016	-2.37971	0.0173263	0.61325	5.31944	0	0	Not Sig	ENSMUSG00000112275	lncRNA	nonsignificant	predicted gene, 47078 [Source:MGI Symbol;Acc:MGI:6095801]
Slc16a9	139.914	0.597543	0.251052	2.38016	0.0173052	0.61325	110.937	168.89	1.5224	Not Sig	ENSMUSG00000037762	protein_coding	nonsignificant	solute carrier family 16 (monocarboxylic acid transporters), member 9 [Source:MGI Symbol;Acc:MGI:1914109]
Taf7l2	37.8357	1.13025	0.474716	2.38089	0.0172707	0.61325	23.702	51.9693	2.19261	Not Sig	ENSMUSG00000074734	transcribed_processed_pseudogene	nonsignificant	Taf7l2 [Source:MGI Symbol;Acc:MGI:6274337]
Pnrc1	4358.52	-0.194348	0.081734	-2.3778	0.0174161	0.615871	4652.82	4064.23	0.873498	Not Sig	ENSMUSG00000040128	protein_coding	nonsignificant	proline-rich nuclear receptor coactivator 1 [Source:MGI Symbol;Acc:MGI:1917838]
Gm20172	328.602	0.562589	0.236733	2.37646	0.0174794	0.617554	264.906	392.298	1.4809	Not Sig	ENSMUSG00000104257	TEC	nonsignificant	predicted gene, 20172 [Source:MGI Symbol;Acc:MGI:5012357]
Cdh20	1318.35	-0.280917	0.118302	-2.37457	0.0175694	0.618316	1446.2	1190.51	0.823197	Not Sig	ENSMUSG00000050840	protein_coding	nonsignificant	cadherin 20 [Source:MGI Symbol;Acc:MGI:1346069]
Ptpn14	1281.05	0.267335	0.112596	2.37428	0.017583	0.618316	1162.5	1399.6	1.20396	Not Sig	ENSMUSG00000026604	protein_coding	nonsignificant	protein tyrosine phosphatase, non-receptor type 14 [Source:MGI Symbol;Acc:MGI:102467]
Gm12337	3.55558	-4.08033	1.71875	-2.37402	0.0175958	0.618316	6.83763	0.273522	0.0400024	Not Sig	ENSMUSG00000084224	processed_pseudogene	nonsignificant	predicted gene 12337 [Source:MGI Symbol;Acc:MGI:3650615]
Map3k9	2171.77	-0.213003	0.0897144	-2.37424	0.0175852	0.618316	2331.26	2012.27	0.863167	Not Sig	ENSMUSG00000042724	protein_coding	nonsignificant	mitogen-activated protein kinase kinase kinase 9 [Source:MGI Symbol;Acc:MGI:2449952]
Gm28373	119.444	0.551831	0.23229	2.37561	0.01752	0.618316	96.8075	142.081	1.46767	Not Sig	ENSMUSG00000096751	lncRNA	nonsignificant	predicted gene 28373 [Source:MGI Symbol;Acc:MGI:5579079]
Zbtb20	80999.9	0.192354	0.0810239	2.37405	0.0175943	0.618316	75608.5	86391.2	1.14261	Not Sig	ENSMUSG00000022708	protein_coding	nonsignificant	zinc finger and BTB domain containing 20 [Source:MGI Symbol;Acc:MGI:1929213]
Smim45	1772.13	-0.211286	0.089072	-2.37208	0.0176882	0.621006	1902.18	1642.08	0.863261	Not Sig	ENSMUSG00000068099	protein_coding	nonsignificant	small integral membrane protein 45 [Source:MGI Symbol;Acc:MGI:1923755]
Gm47075	506.809	0.46055	0.194184	2.37171	0.0177058	0.621068	426.454	587.165	1.37685	Not Sig	ENSMUSG00000114169	TEC	nonsignificant	predicted gene, 47075 [Source:MGI Symbol;Acc:MGI:6095795]
Gm36997	2.49991	-4.59224	1.93732	-2.37041	0.0177685	0.621741	4.99982	0	0	Not Sig	ENSMUSG00000103775	TEC	nonsignificant	predicted gene, 36997 [Source:MGI Symbol;Acc:MGI:5610225]
Gm12243	12.2282	1.91782	0.808888	2.37093	0.0177435	0.621741	5.13994	19.3165	3.75811	Not Sig	ENSMUSG00000086028	lncRNA	nonsignificant	predicted gene 12243 [Source:MGI Symbol;Acc:MGI:3649716]
Gm53055	110.224	0.60088	0.253502	2.37032	0.0177726	0.621741	87.593	132.855	1.51674	Not Sig	ENSMUSG00000057990	processed_pseudogene	nonsignificant	predicted gene 53055 [Source:MGI Symbol;Acc:MGI:6435211]
Ubqln4	4894.76	-0.186731	0.0788163	-2.36919	0.0178269	0.623053	5212.22	4577.31	0.878188	Not Sig	ENSMUSG00000008604	protein_coding	nonsignificant	ubiquilin 4 [Source:MGI Symbol;Acc:MGI:2150152]
Gabra1	24050.9	-0.171298	0.0723118	-2.36888	0.017842	0.623053	25477.3	22624.6	0.88803	Not Sig	ENSMUSG00000010803	protein_coding	nonsignificant	gamma-aminobutyric acid type A receptor subunit alpha 1 [Source:MGI Symbol;Acc:MGI:95613]
Gm25335	23.6574	1.37182	0.579529	2.36712	0.0179269	0.623239	13.162	34.1528	2.59481	Not Sig	ENSMUSG00000088668	snRNA	nonsignificant	predicted gene, 25335 [Source:MGI Symbol;Acc:MGI:5455112]
Muc6	292.283	0.451179	0.190537	2.36793	0.0178878	0.623239	246.419	338.147	1.37224	Not Sig	ENSMUSG00000118661	protein_coding	nonsignificant	mucin 6, gastric [Source:MGI Symbol;Acc:MGI:2663233]
Gm36940	180.975	0.481157	0.203242	2.36741	0.0179133	0.623239	150.634	211.316	1.40284	Not Sig	ENSMUSG00000102419	TEC	nonsignificant	predicted gene, 36940 [Source:MGI Symbol;Acc:MGI:5610168]
Cgnl1	1332.47	0.869601	0.367243	2.36792	0.0178885	0.623239	942.442	1722.49	1.82769	Not Sig	ENSMUSG00000032232	protein_coding	nonsignificant	cingulin-like 1 [Source:MGI Symbol;Acc:MGI:1915428]
Peli3	1286.8	-0.223688	0.0944764	-2.36766	0.0179008	0.623239	1386.13	1187.46	0.856675	Not Sig	ENSMUSG00000024901	protein_coding	nonsignificant	pellino 3 [Source:MGI Symbol;Acc:MGI:1924963]
Vps18	2040.73	-0.208599	0.0881951	-2.3652	0.0180203	0.625929	2188.51	1892.95	0.864948	Not Sig	ENSMUSG00000034216	protein_coding	nonsignificant	VPS18 CORVET/HOPS core subunit [Source:MGI Symbol;Acc:MGI:2443626]
Macrod2os1	187.847	0.639439	0.270623	2.36284	0.0181353	0.627678	146.382	229.312	1.56653	Not Sig	ENSMUSG00000086450	lncRNA	nonsignificant	mono-ADP ribosylhydrolase 2, opposite strand 1 [Source:MGI Symbol;Acc:MGI:3650192]
Tm9sf4	3967.99	-0.177121	0.0749377	-2.36357	0.0180996	0.627678	4211.44	3724.55	0.88439	Not Sig	ENSMUSG00000068040	protein_coding	nonsignificant	transmembrane 9 superfamily member 4 [Source:MGI Symbol;Acc:MGI:2139220]
Gnasas1	48.8652	0.861849	0.364652	2.36348	0.0181041	0.627678	34.6031	63.1273	1.82432	Not Sig	ENSMUSG00000086537	lncRNA	nonsignificant	GNAS antisense RNA 1 [Source:MGI Symbol;Acc:MGI:1861674]
Dclk1	62757	-0.151615	0.0641725	-2.36261	0.0181467	0.627678	66051.5	59462.5	0.900244	Not Sig	ENSMUSG00000027797	protein_coding	nonsignificant	doublecortin-like kinase 1 [Source:MGI Symbol;Acc:MGI:1330861]
Maco1	3898.16	-0.166115	0.070332	-2.36187	0.0181829	0.627678	4122.12	3674.2	0.891338	Not Sig	ENSMUSG00000028826	protein_coding	nonsignificant	macoilin 1 [Source:MGI Symbol;Acc:MGI:1913396]
Cltb	5572.4	-0.170982	0.0723828	-2.36219	0.0181675	0.627678	5902.62	5242.19	0.888113	Not Sig	ENSMUSG00000047547	protein_coding	nonsignificant	clathrin light chain B [Source:MGI Symbol;Acc:MGI:1921575]
Ppp2r5b	4278.15	-0.21547	0.0912245	-2.36197	0.0181781	0.627678	4599.3	3956.99	0.860347	Not Sig	ENSMUSG00000024777	protein_coding	nonsignificant	protein phosphatase 2, regulatory subunit B', beta [Source:MGI Symbol;Acc:MGI:2388480]
Srebf2	8799.66	-0.180994	0.0766512	-2.36127	0.0182126	0.628149	9351.89	8247.43	0.881899	Not Sig	ENSMUSG00000022463	protein_coding	nonsignificant	sterol regulatory element binding factor 2 [Source:MGI Symbol;Acc:MGI:107585]
Dpysl2	51069.7	-0.164181	0.0695428	-2.36086	0.0182325	0.628284	53974.3	48165	0.892371	Not Sig	ENSMUSG00000022048	protein_coding	nonsignificant	dihydropyrimidinase-like 2 [Source:MGI Symbol;Acc:MGI:1349763]
Gm6069	2.2465	4.79425	2.03242	2.35889	0.0183298	0.62942	0	4.493	Inf	Not Sig	ENSMUSG00000104616	transcribed_processed_pseudogene	nonsignificant	predicted gene 6069 [Source:MGI Symbol;Acc:MGI:3648422]
Gm37725	166.818	0.697894	0.295825	2.35914	0.0183172	0.62942	126.97	206.667	1.62768	Not Sig	ENSMUSG00000102916	TEC	nonsignificant	predicted gene, 37725 [Source:MGI Symbol;Acc:MGI:5610953]
Gm48215	2.2465	4.79425	2.03242	2.35889	0.0183298	0.62942	0	4.493	Inf	Not Sig	ENSMUSG00000111195	lncRNA	nonsignificant	predicted gene, 48215 [Source:MGI Symbol;Acc:MGI:6097611]
Gm4117	258.62	0.505029	0.214033	2.35958	0.0182955	0.62942	213.256	303.985	1.42545	Not Sig	ENSMUSG00000089940	lncRNA	nonsignificant	predicted gene 4117 [Source:MGI Symbol;Acc:MGI:3782293]
Gm44090	429.133	0.357614	0.151668	2.35788	0.0183796	0.630576	375.533	482.732	1.28546	Not Sig	ENSMUSG00000107927	TEC	nonsignificant	predicted gene, 44090 [Source:MGI Symbol;Acc:MGI:5690482]
Dkkl1	45.9126	-0.993459	0.421396	-2.35754	0.0183965	0.630602	61.1908	30.6345	0.50064	Not Sig	ENSMUSG00000030792	protein_coding	nonsignificant	dickkopf-like 1 [Source:MGI Symbol;Acc:MGI:1354963]
Hs6st1	2388.85	-0.23169	0.0983237	-2.3564	0.0184528	0.630877	2581.06	2196.63	0.851058	Not Sig	ENSMUSG00000045216	protein_coding	nonsignificant	heparan sulfate 6-O-sulfotransferase 1 [Source:MGI Symbol;Acc:MGI:1354958]
D130062J10Rik	176.024	0.521139	0.22114	2.35661	0.0184428	0.630877	144.14	207.908	1.44241	Not Sig	ENSMUSG00000114598	lncRNA	nonsignificant	RIKEN cDNA D130062J10 gene [Source:MGI Symbol;Acc:MGI:2441949]
Sult4a1	10953.6	-0.18107	0.0768336	-2.35664	0.0184409	0.630877	11641.6	10265.6	0.881806	Not Sig	ENSMUSG00000018865	protein_coding	nonsignificant	sulfotransferase family 4A, member 1 [Source:MGI Symbol;Acc:MGI:1888971]
Ankle1	11.2187	1.82825	0.77644	2.35466	0.0185398	0.633297	4.89621	17.5412	3.58261	Not Sig	ENSMUSG00000046295	protein_coding	nonsignificant	ankyrin repeat and LEM domain containing 1 [Source:MGI Symbol;Acc:MGI:1918775]
Gm42648	128.424	0.644047	0.273716	2.35298	0.0186237	0.634588	99.8946	156.953	1.57119	Not Sig	ENSMUSG00000106682	TEC	nonsignificant	predicted gene 42648 [Source:MGI Symbol;Acc:MGI:5662785]
Kcnq1ot1	29670.1	0.453399	0.192671	2.35323	0.0186112	0.634588	25045.5	34294.8	1.3693	Not Sig	ENSMUSG00000101609	lncRNA	nonsignificant	KCNQ1 overlapping transcript 1 [Source:MGI Symbol;Acc:MGI:1926855]
Gm48967	1321.93	0.367676	0.156263	2.35293	0.0186262	0.634588	1153.6	1490.27	1.29183	Not Sig	ENSMUSG00000115023	TEC	nonsignificant	predicted gene, 48967 [Source:MGI Symbol;Acc:MGI:6118304]
Gm37589	499.713	0.384436	0.163479	2.35159	0.0186934	0.63489	432.859	566.568	1.3089	Not Sig	ENSMUSG00000104235	TEC	nonsignificant	predicted gene, 37589 [Source:MGI Symbol;Acc:MGI:5610817]
Gm13160	2.33745	4.83045	2.05414	2.35157	0.0186943	0.63489	0	4.67489	Inf	Not Sig	ENSMUSG00000094017	processed_pseudogene	nonsignificant	predicted gene 13160 [Source:MGI Symbol;Acc:MGI:3649984]
Gm10826	213.093	0.585574	0.248999	2.35171	0.0186874	0.63489	169.838	256.349	1.50937	Not Sig	ENSMUSG00000111006	TEC	nonsignificant	predicted gene 10826 [Source:MGI Symbol;Acc:MGI:3642318]
Gm47917	87.934	0.691807	0.294203	2.35146	0.0186999	0.63489	67.143	108.725	1.61931	Not Sig	ENSMUSG00000112824	lncRNA	nonsignificant	predicted gene, 47917 [Source:MGI Symbol;Acc:MGI:6097168]
Meaf6	4967.49	-0.163746	0.0697108	-2.34894	0.018827	0.638098	5249.28	4685.7	0.892635	Not Sig	ENSMUSG00000028863	protein_coding	nonsignificant	MYST/Esa1-associated factor 6 [Source:MGI Symbol;Acc:MGI:1917338]
Slc38a1	14065.2	-0.154019	0.0655682	-2.34898	0.0188248	0.638098	14815.9	13314.4	0.898659	Not Sig	ENSMUSG00000023169	protein_coding	nonsignificant	solute carrier family 38, member 1 [Source:MGI Symbol;Acc:MGI:2145895]
Gm44518	751.37	0.794043	0.33816	2.34813	0.0188678	0.638928	549.524	953.216	1.73462	Not Sig	ENSMUSG00000109385	TEC	nonsignificant	predicted gene 44518 [Source:MGI Symbol;Acc:MGI:5753094]
Gm48382	243.822	0.440773	0.187752	2.34763	0.0188933	0.639237	206.588	281.056	1.36047	Not Sig	ENSMUSG00000113917	TEC	nonsignificant	predicted gene, 48382 [Source:MGI Symbol;Acc:MGI:6097861]
Gm48904	148.734	0.510124	0.217377	2.34672	0.0189396	0.640249	122.517	174.95	1.42796	Not Sig	ENSMUSG00000114081	TEC	nonsignificant	predicted gene, 48904 [Source:MGI Symbol;Acc:MGI:6098675]
Gm44286	570.537	0.406124	0.173108	2.34608	0.0189721	0.640794	490.027	651.048	1.3286	Not Sig	ENSMUSG00000107707	TEC	nonsignificant	predicted gene, 44286 [Source:MGI Symbol;Acc:MGI:5690678]
Gm20705	74.5223	0.691255	0.294867	2.3443	0.019063	0.642214	56.8847	92.1599	1.62012	Not Sig	ENSMUSG00000093559	lncRNA	nonsignificant	predicted gene 20705 [Source:MGI Symbol;Acc:MGI:5313152]
Got2	7628.07	-0.174527	0.0744477	-2.34429	0.0190633	0.642214	8089.33	7166.8	0.885957	Not Sig	ENSMUSG00000031672	protein_coding	nonsignificant	glutamatic-oxaloacetic transaminase 2, mitochondrial [Source:MGI Symbol;Acc:MGI:95792]
Gm5679	12.1212	-1.88382	0.803522	-2.34445	0.019055	0.642214	19.0742	5.16808	0.270945	Not Sig	ENSMUSG00000116817	processed_pseudogene	nonsignificant	predicted gene 5679 [Source:MGI Symbol;Acc:MGI:3779512]
Pak1	14845.5	-0.226656	0.0967121	-2.34362	0.0190977	0.642265	16010.4	13680.6	0.854481	Not Sig	ENSMUSG00000030774	protein_coding	nonsignificant	p21 (RAC1) activated kinase 1 [Source:MGI Symbol;Acc:MGI:1339975]
Leprotl1	2965.31	-0.184353	0.0786574	-2.34374	0.0190914	0.642265	3155.4	2775.21	0.879512	Not Sig	ENSMUSG00000031513	protein_coding	nonsignificant	leptin receptor overlapping transcript-like 1 [Source:MGI Symbol;Acc:MGI:1915442]
Gm14774	61.1794	0.861935	0.367963	2.34245	0.0191576	0.643727	43.1593	79.1995	1.83505	Not Sig	ENSMUSG00000081424	processed_pseudogene	nonsignificant	predicted gene 14774 [Source:MGI Symbol;Acc:MGI:3705616]
Lmbrd1	11036.1	-0.151071	0.0645235	-2.34133	0.0192152	0.644557	11612.5	10459.6	0.900714	Not Sig	ENSMUSG00000073725	protein_coding	nonsignificant	LMBR1 domain containing 1 [Source:MGI Symbol;Acc:MGI:1915671]
Ttr	25660	2.96787	1.26744	2.34162	0.0192003	0.644557	5816.15	45503.9	7.82371	Not Sig	ENSMUSG00000061808	protein_coding	nonsignificant	transthyretin [Source:MGI Symbol;Acc:MGI:98865]
Bcat1	5631.35	-0.161369	0.0689423	-2.34064	0.0192508	0.645199	5946.18	5316.52	0.894106	Not Sig	ENSMUSG00000030268	protein_coding	nonsignificant	branched chain aminotransferase 1, cytosolic [Source:MGI Symbol;Acc:MGI:104861]
Gm43274	259.568	0.473002	0.202122	2.34018	0.0192745	0.645439	217.446	301.689	1.38742	Not Sig	ENSMUSG00000107116	TEC	nonsignificant	predicted gene 43274 [Source:MGI Symbol;Acc:MGI:5663411]
Prox2	249.322	0.445223	0.190336	2.33915	0.0193279	0.645573	210.883	287.76	1.36455	Not Sig	ENSMUSG00000042320	protein_coding	nonsignificant	prospero homeobox 2 [Source:MGI Symbol;Acc:MGI:1920672]
Fignl2	88.903	-0.629476	0.269097	-2.33922	0.0193241	0.645573	108.132	69.6743	0.644347	Not Sig	ENSMUSG00000095440	protein_coding	nonsignificant	fidgetin-like 2 [Source:MGI Symbol;Acc:MGI:3646919]
Gm16861	104.347	0.636063	0.27188	2.3395	0.0193097	0.645573	81.3421	127.352	1.56563	Not Sig	ENSMUSG00000097397	lncRNA	nonsignificant	predicted gene, 16861 [Source:MGI Symbol;Acc:MGI:4439785]
Gm43259	184.448	0.514881	0.220163	2.33863	0.0193544	0.645907	151.543	217.353	1.43426	Not Sig	ENSMUSG00000106432	lncRNA	nonsignificant	predicted gene 43259 [Source:MGI Symbol;Acc:MGI:5663396]
Pgr15l	12.4848	1.74336	0.745566	2.3383	0.0193717	0.645931	5.76418	19.2055	3.33187	Not Sig	ENSMUSG00000031212	protein_coding	nonsignificant	G protein-coupled receptor 15-like [Source:MGI Symbol;Acc:MGI:2676330]
Prkar1a	37710.6	-0.150126	0.0642149	-2.33787	0.0193937	0.646117	39672.5	35748.7	0.901096	Not Sig	ENSMUSG00000020612	protein_coding	nonsignificant	protein kinase, cAMP dependent regulatory, type I, alpha [Source:MGI Symbol;Acc:MGI:104878]
Gm49001	227.702	0.44871	0.191984	2.33723	0.0194272	0.646682	192.885	262.518	1.36101	Not Sig	ENSMUSG00000115733	transcribed_processed_pseudogene	nonsignificant	predicted gene, 49001 [Source:MGI Symbol;Acc:MGI:6118353]
Gm16958	168.085	0.709891	0.303813	2.3366	0.0194599	0.64709	127.04	209.13	1.64617	Not Sig	ENSMUSG00000097456	lncRNA	nonsignificant	predicted gene, 16958 [Source:MGI Symbol;Acc:MGI:4439882]
Cd209g	4.08498	3.71313	1.58928	2.33636	0.0194725	0.64709	0.563346	7.60662	13.5026	Not Sig	ENSMUSG00000079168	protein_coding	nonsignificant	CD209g antigen [Source:MGI Symbol;Acc:MGI:1917442]
Rasgef1c	81.5728	-0.69815	0.298922	-2.33556	0.0195142	0.647923	100.985	62.1608	0.615546	Not Sig	ENSMUSG00000020374	protein_coding	nonsignificant	RasGEF domain family, member 1C [Source:MGI Symbol;Acc:MGI:1921813]
Uchl1	11642.9	-0.189932	0.0813425	-2.33497	0.0195449	0.647932	12410.6	10875.2	0.876283	Not Sig	ENSMUSG00000029223	protein_coding	nonsignificant	ubiquitin carboxy-terminal hydrolase L1 [Source:MGI Symbol;Acc:MGI:103149]
Hrc	45.4949	0.907256	0.388612	2.3346	0.0195641	0.647932	31.5874	59.4024	1.88057	Not Sig	ENSMUSG00000038239	protein_coding	nonsignificant	histidine rich calcium binding protein [Source:MGI Symbol;Acc:MGI:96226]
Gm39117	2.24143	4.77731	2.04611	2.33483	0.0195525	0.647932	0	4.48285	Inf	Not Sig	ENSMUSG00000108952	lncRNA	nonsignificant	predicted gene, 39117 [Source:MGI Symbol;Acc:MGI:5622002]
Cldn3	14.7587	1.71987	0.737098	2.3333	0.0196323	0.648546	6.96245	22.555	3.23953	Not Sig	ENSMUSG00000070473	protein_coding	nonsignificant	claudin 3 [Source:MGI Symbol;Acc:MGI:1329044]
Atp2b2	46618.6	-0.1973	0.0845515	-2.33349	0.0196224	0.648546	49801	43436.2	0.872195	Not Sig	ENSMUSG00000030302	protein_coding	nonsignificant	ATPase, Ca++ transporting, plasma membrane 2 [Source:MGI Symbol;Acc:MGI:105368]
Gm3695	53.9055	0.864024	0.370259	2.33356	0.0196186	0.648546	38.1319	69.679	1.82731	Not Sig	ENSMUSG00000067224	processed_pseudogene	nonsignificant	predicted gene 3695 [Source:MGI Symbol;Acc:MGI:3781871]
Gm26968	2.18025	4.76726	2.04666	2.32929	0.019844	0.648982	0	4.36051	Inf	Not Sig	ENSMUSG00000097942	lncRNA	nonsignificant	predicted gene, 26968 [Source:MGI Symbol;Acc:MGI:5504083]
Zfyve9	8627.02	-0.158144	0.0678854	-2.32957	0.0198287	0.648982	9099.67	8154.38	0.896118	Not Sig	ENSMUSG00000034557	protein_coding	nonsignificant	zinc finger, FYVE domain containing 9 [Source:MGI Symbol;Acc:MGI:2652838]
Gm28307	195.789	0.462483	0.198355	2.33159	0.0197224	0.648982	164.327	227.25	1.38291	Not Sig	ENSMUSG00000101643	lncRNA	nonsignificant	predicted gene 28307 [Source:MGI Symbol;Acc:MGI:5579013]
Gm32983	35.3629	0.997228	0.427564	2.33235	0.0196824	0.648982	23.5727	47.153	2.00032	Not Sig	ENSMUSG00000109342	processed_pseudogene	nonsignificant	predicted gene, 32983 [Source:MGI Symbol;Acc:MGI:5592142]
Gm45293	78.444	0.849787	0.364878	2.32896	0.0198611	0.648982	55.9574	100.931	1.8037	Not Sig	ENSMUSG00000110325	TEC	nonsignificant	predicted gene 45293 [Source:MGI Symbol;Acc:MGI:5791129]
Gm7435	132.308	0.58494	0.251157	2.32898	0.0198601	0.648982	105.679	158.936	1.50396	Not Sig	ENSMUSG00000111662	transcribed_processed_pseudogene	nonsignificant	predicted gene 7435 [Source:MGI Symbol;Acc:MGI:3646489]
2900040C04Rik	30.0927	3.08867	1.32609	2.32916	0.0198504	0.648982	6.37646	53.809	8.4387	Not Sig	ENSMUSG00000115625	lncRNA	nonsignificant	RIKEN cDNA 2900040C04 gene [Source:MGI Symbol;Acc:MGI:1920143]
Pmm1	2960.24	-0.182303	0.078241	-2.33002	0.0198053	0.648982	3147.24	2773.24	0.881168	Not Sig	ENSMUSG00000022474	protein_coding	nonsignificant	phosphomannomutase 1 [Source:MGI Symbol;Acc:MGI:1353418]
Tagap1	676.976	-0.287174	0.123297	-2.32911	0.0198531	0.648982	745.085	608.866	0.817176	Not Sig	ENSMUSG00000052031	protein_coding	nonsignificant	T cell activation GTPase activating protein 1 [Source:MGI Symbol;Acc:MGI:1919786]
Gm9984	77.2005	0.716287	0.307079	2.33258	0.0196702	0.648982	58.2151	96.1859	1.65225	Not Sig	ENSMUSG00000114492	lncRNA	nonsignificant	predicted gene 9984 [Source:MGI Symbol;Acc:MGI:3641639]
Crim1	8888.48	-0.187187	0.0803135	-2.3307	0.0197691	0.648982	9465.55	8311.42	0.878071	Not Sig	ENSMUSG00000024074	protein_coding	nonsignificant	cysteine rich transmembrane BMP regulator 1 [Source:MGI Symbol;Acc:MGI:1354756]
Slc12a2	8709.48	0.249064	0.106834	2.33132	0.0197365	0.648982	7958.97	9459.98	1.18859	Not Sig	ENSMUSG00000024597	protein_coding	nonsignificant	solute carrier family 12, member 2 [Source:MGI Symbol;Acc:MGI:101924]
Gm8974	11.4503	1.76851	0.75881	2.33064	0.0197725	0.648982	5.20084	17.6997	3.40324	Not Sig	ENSMUSG00000093525	processed_pseudogene	nonsignificant	predicted gene 8974 [Source:MGI Symbol;Acc:MGI:3648532]
Uqcc2	1260.8	-0.241036	0.103538	-2.328	0.0199121	0.650109	1366.92	1154.69	0.844738	Not Sig	ENSMUSG00000024208	protein_coding	nonsignificant	ubiquinol-cytochrome c reductase complex assembly factor 2 [Source:MGI Symbol;Acc:MGI:1914517]
Gm5881	191.761	0.437464	0.187997	2.32697	0.0199669	0.651352	162.701	220.82	1.35722	Not Sig	ENSMUSG00000107747	processed_pseudogene	nonsignificant	predicted gene 5881 [Source:MGI Symbol;Acc:MGI:3779532]
1700120E14Rik	8.90792	2.33112	1.00196	2.32655	0.019989	0.651533	2.94745	14.8684	5.04449	Not Sig	ENSMUSG00000086333	lncRNA	nonsignificant	RIKEN cDNA 1700120E14 gene [Source:MGI Symbol;Acc:MGI:1920856]
Gm17213	56.9057	0.858423	0.369226	2.32493	0.0200759	0.652191	40.3477	73.4636	1.82077	Not Sig	ENSMUSG00000090743	processed_pseudogene	nonsignificant	predicted gene 17213 [Source:MGI Symbol;Acc:MGI:4938040]
Eri3	3904.67	-0.176277	0.0758191	-2.32496	0.0200739	0.652191	4143.75	3665.59	0.884607	Not Sig	ENSMUSG00000033423	protein_coding	nonsignificant	exoribonuclease 3 [Source:MGI Symbol;Acc:MGI:2153887]
	11.7647	1.84291	0.792634	2.32505	0.0200691	0.652191	5.17054	18.3589	3.55068	Not Sig	ENSMUSG00000119699		nonsignificant
Gm45187	93.7468	0.630181	0.270959	2.32574	0.0200322	0.652191	73.6754	113.818	1.54486	Not Sig	ENSMUSG00000109130	lncRNA	nonsignificant	predicted gene 45187 [Source:MGI Symbol;Acc:MGI:5753763]
Cep112	681.949	0.340017	0.146284	2.32437	0.0201057	0.65262	602.318	761.581	1.26442	Not Sig	ENSMUSG00000020728	protein_coding	nonsignificant	centrosomal protein 112 [Source:MGI Symbol;Acc:MGI:1923673]
D930015M05Rik	157.074	0.567534	0.24454	2.32082	0.0202965	0.655009	126.007	188.141	1.4931	Not Sig	ENSMUSG00000084781	lncRNA	nonsignificant	RIKEN cDNA D930015M05 gene [Source:MGI Symbol;Acc:MGI:3612068]
Pcif1	2068.84	-0.226932	0.0977271	-2.3221	0.0202275	0.655009	2232.7	1904.99	0.853224	Not Sig	ENSMUSG00000039849	protein_coding	nonsignificant	phosphorylated CTD interacting factor 1 [Source:MGI Symbol;Acc:MGI:2443858]
Gm34780	2.17518	4.74989	2.04622	2.3213	0.0202708	0.655009	0	4.35035	Inf	Not Sig	ENSMUSG00000103513	TEC	nonsignificant	predicted gene, 34780 [Source:MGI Symbol;Acc:MGI:5593939]
E230013L22Rik	6.96487	2.9663	1.27769	2.32162	0.0202536	0.655009	1.62914	12.3006	7.55035	Not Sig	ENSMUSG00000096957	lncRNA	nonsignificant	RIKEN cDNA E230013L22 gene [Source:MGI Symbol;Acc:MGI:2142601]
Traf3ip2	597.455	0.322193	0.138812	2.32108	0.0202828	0.655009	530.236	664.673	1.25354	Not Sig	ENSMUSG00000019842	protein_coding	nonsignificant	TRAF3 interacting protein 2 [Source:MGI Symbol;Acc:MGI:2143599]
Gm49127	51.1481	0.856926	0.36913	2.32148	0.0202612	0.655009	36.2532	66.0431	1.82172	Not Sig	ENSMUSG00000115460	lncRNA	nonsignificant	predicted gene, 49127 [Source:MGI Symbol;Acc:MGI:6118534]
Prph	35.7324	-1.12215	0.483445	-2.32115	0.020279	0.655009	49.1311	22.3337	0.454574	Not Sig	ENSMUSG00000023484	protein_coding	nonsignificant	peripherin [Source:MGI Symbol;Acc:MGI:97774]
Bola1	173.921	-0.481811	0.207751	-2.31917	0.0203856	0.655571	202.747	145.096	0.71565	Not Sig	ENSMUSG00000015943	protein_coding	nonsignificant	bolA family member 1 [Source:MGI Symbol;Acc:MGI:1916418]
Spock2	45200.2	-0.149849	0.0646193	-2.31895	0.0203976	0.655571	47546.1	42854.4	0.901323	Not Sig	ENSMUSG00000058297	protein_coding	nonsignificant	sparc/osteonectin, cwcv and kazal-like domains proteoglycan 2 [Source:MGI Symbol;Acc:MGI:1891351]
Dhfr	347.429	0.373079	0.160873	2.31909	0.0203903	0.655571	302.083	392.776	1.30023	Not Sig	ENSMUSG00000021707	protein_coding	nonsignificant	dihydrofolate reductase [Source:MGI Symbol;Acc:MGI:94890]
Lynx1	16854.5	-0.174817	0.0753747	-2.31931	0.0203783	0.655571	17875	15834.1	0.885825	Not Sig	ENSMUSG00000022594	protein_coding	nonsignificant	Ly6/neurotoxin 1 [Source:MGI Symbol;Acc:MGI:1345180]
C430042M11Rik	5.85055	-2.79746	1.20576	-2.32008	0.0203367	0.655571	10.2083	1.49279	0.146233	Not Sig	ENSMUSG00000097254	lncRNA	nonsignificant	RIKEN cDNA C430042M11 gene [Source:MGI Symbol;Acc:MGI:2443186]
Emc4	1674.65	-0.214693	0.0926549	-2.31712	0.020497	0.656565	1799.43	1549.87	0.861308	Not Sig	ENSMUSG00000027131	protein_coding	nonsignificant	ER membrane protein complex subunit 4 [Source:MGI Symbol;Acc:MGI:1915282]
4933407E24Rik	47.8009	0.864122	0.372787	2.31801	0.0204489	0.656565	33.8102	61.7916	1.8276	Not Sig	ENSMUSG00000073759	lncRNA	nonsignificant	RIKEN cDNA 4933407E24 gene [Source:MGI Symbol;Acc:MGI:1918352]
Armc2	437.947	0.339245	0.146381	2.31755	0.0204737	0.656565	386.364	489.53	1.26702	Not Sig	ENSMUSG00000071324	protein_coding	nonsignificant	armadillo repeat containing 2 [Source:MGI Symbol;Acc:MGI:1916449]
Kiss1r	190.381	-0.482931	0.208453	-2.31674	0.0205179	0.656565	222.403	158.359	0.712038	Not Sig	ENSMUSG00000035773	protein_coding	nonsignificant	KISS1 receptor [Source:MGI Symbol;Acc:MGI:2148793]
1700086D15Rik	147.107	0.563035	0.243042	2.31661	0.0205247	0.656565	118.607	175.608	1.48059	Not Sig	ENSMUSG00000020548	lncRNA	nonsignificant	RIKEN cDNA 1700086D15 gene [Source:MGI Symbol;Acc:MGI:1921532]
Gm22499	53.5896	0.871514	0.376215	2.31653	0.0205292	0.656565	37.7911	69.388	1.83609	Not Sig	ENSMUSG00000077689	snoRNA	nonsignificant	predicted gene, 22499 [Source:MGI Symbol;Acc:MGI:5452276]
Gm37780	81.9102	0.68365	0.295529	2.31331	0.0207058	0.657995	63.0069	100.814	1.60004	Not Sig	ENSMUSG00000102691	TEC	nonsignificant	predicted gene, 37780 [Source:MGI Symbol;Acc:MGI:5611008]
Tmprss11a	36.4586	2.84347	1.22858	2.31443	0.020644	0.657995	8.94627	63.971	7.15057	Not Sig	ENSMUSG00000072845	protein_coding	nonsignificant	transmembrane protease, serine 11a [Source:MGI Symbol;Acc:MGI:2684853]
Dnhd1	396.826	0.390563	0.168826	2.31341	0.0207001	0.657995	343.214	450.438	1.31241	Not Sig	ENSMUSG00000030882	protein_coding	nonsignificant	dynein heavy chain domain 1 [Source:MGI Symbol;Acc:MGI:1924755]
Gm12258	1801.31	-0.209276	0.0904661	-2.31331	0.0207059	0.657995	1930.88	1671.75	0.865797	Not Sig	ENSMUSG00000072915	protein_coding	nonsignificant	predicted gene 12258 [Source:MGI Symbol;Acc:MGI:3651534]
Kcnj12	246.413	-0.460151	0.198741	-2.31533	0.0205947	0.657995	285.36	207.467	0.727035	Not Sig	ENSMUSG00000042529	protein_coding	nonsignificant	potassium inwardly-rectifying channel, subfamily J, member 12 [Source:MGI Symbol;Acc:MGI:108495]
Gm48015	233.4	0.591185	0.255378	2.31494	0.0206164	0.657995	186.125	280.674	1.50799	Not Sig	ENSMUSG00000112067	TEC	nonsignificant	predicted gene, 48015 [Source:MGI Symbol;Acc:MGI:6097323]
Mnd1-ps	5.01304	2.96308	1.28073	2.31359	0.0206903	0.657995	1.11139	8.91468	8.02119	Not Sig	ENSMUSG00000089686	transcribed_processed_pseudogene	nonsignificant	Mnd1 retrotransposed pseudogene [Source:MGI Symbol;Acc:MGI:3782005]
Ccdc116	74.1511	-0.687424	0.297167	-2.31326	0.0207084	0.657995	91.4925	56.8096	0.620921	Not Sig	ENSMUSG00000022768	protein_coding	nonsignificant	coiled-coil domain containing 116 [Source:MGI Symbol;Acc:MGI:1924122]
Gm38365	292.775	0.415922	0.179951	2.31131	0.0208155	0.659232	250.281	335.27	1.33958	Not Sig	ENSMUSG00000103591	TEC	nonsignificant	predicted gene, 38365 [Source:MGI Symbol;Acc:MGI:5611593]
Gm29538	6.06544	3.28424	1.42106	2.31112	0.0208263	0.659232	1.09609	11.0348	10.0674	Not Sig	ENSMUSG00000099553	lncRNA	nonsignificant	predicted gene 29538 [Source:MGI Symbol;Acc:MGI:5580244]
Scnm1	658.139	-0.301529	0.130474	-2.31102	0.0208315	0.659232	725.946	590.332	0.81319	Not Sig	ENSMUSG00000092607	protein_coding	nonsignificant	sodium channel modifier 1 [Source:MGI Symbol;Acc:MGI:1341284]
Gm42888	123.54	0.603702	0.261177	2.31147	0.020807	0.659232	97.8522	149.227	1.52503	Not Sig	ENSMUSG00000107148	TEC	nonsignificant	predicted gene 42888 [Source:MGI Symbol;Acc:MGI:5663025]
Hoatz	27.0999	1.37733	0.595754	2.31191	0.0207829	0.659232	15.0315	39.1684	2.60575	Not Sig	ENSMUSG00000032057	protein_coding	nonsignificant	HOATZ cilia and flagella associated protein [Source:MGI Symbol;Acc:MGI:1921013]
Dynlrb2	52.0869	1.05771	0.457857	2.31012	0.0208813	0.660273	33.8191	70.3547	2.08032	Not Sig	ENSMUSG00000034467	protein_coding	nonsignificant	dynein light chain roadblock-type 2 [Source:MGI Symbol;Acc:MGI:1922715]
Gm50196	50.7307	0.872541	0.377761	2.30977	0.020901	0.660365	35.7513	65.7101	1.83798	Not Sig	ENSMUSG00000117956	lncRNA	nonsignificant	predicted gene, 50196 [Source:MGI Symbol;Acc:MGI:6302974]
Rps21	4737.39	-0.188975	0.08193	-2.30654	0.0210806	0.660707	5049.14	4425.65	0.876516	Not Sig	ENSMUSG00000039001	protein_coding	nonsignificant	ribosomal protein S21 [Source:MGI Symbol;Acc:MGI:1913731]
Arhgef10l	1473.81	-0.27489	0.119138	-2.30732	0.0210368	0.660707	1613.94	1333.67	0.826344	Not Sig	ENSMUSG00000040964	protein_coding	nonsignificant	Rho guanine nucleotide exchange factor 10-like [Source:MGI Symbol;Acc:MGI:1920004]
Vgf	5165.38	-0.251194	0.108904	-2.30656	0.0210796	0.660707	5616.31	4714.45	0.839422	Not Sig	ENSMUSG00000037428	protein_coding	nonsignificant	VGF nerve growth factor inducible [Source:MGI Symbol;Acc:MGI:1343180]
Slc2a12	546.687	1.1813	0.512006	2.30721	0.0210433	0.660707	334.546	758.828	2.26823	Not Sig	ENSMUSG00000037490	protein_coding	nonsignificant	solute carrier family 2 (facilitated glucose transporter), member 12 [Source:MGI Symbol;Acc:MGI:3052471]
Slfn5	451.524	0.306876	0.132948	2.30825	0.0209852	0.660707	403.913	499.135	1.23575	Not Sig	ENSMUSG00000054404	protein_coding	nonsignificant	schlafen 5 [Source:MGI Symbol;Acc:MGI:1329004]
H2bc4	1109.45	0.24247	0.105054	2.30806	0.0209959	0.660707	1017.5	1201.4	1.18074	Not Sig	ENSMUSG00000018102	protein_coding	nonsignificant	H2B clustered histone 4 [Source:MGI Symbol;Acc:MGI:1915274]
Smarcd1	4167.24	-0.177481	0.0768718	-2.30879	0.0209553	0.660707	4423.82	3910.66	0.884001	Not Sig	ENSMUSG00000023018	protein_coding	nonsignificant	SWI/SNF related, matrix associated, actin dependent regulator of chromatin, subfamily d, member 1 [Source:MGI Symbol;Acc:MGI:1933623]
Bnip5	224.175	-0.518618	0.224778	-2.30724	0.0210413	0.660707	264.694	183.655	0.693839	Not Sig	ENSMUSG00000048905	protein_coding	nonsignificant	BCL2 interacting protein 5 [Source:MGI Symbol;Acc:MGI:1925441]
Col4a5	546.453	0.294582	0.127623	2.30822	0.0209868	0.660707	490.553	602.353	1.22791	Not Sig	ENSMUSG00000031274	protein_coding	nonsignificant	collagen, type IV, alpha 5 [Source:MGI Symbol;Acc:MGI:88456]
Eif2s3y	3807	0.238319	0.103304	2.30696	0.021057	0.660707	3492.97	4121.02	1.1798	Not Sig	ENSMUSG00000069049	protein_coding	nonsignificant	eukaryotic translation initiation factor 2, subunit 3, structural gene Y-linked [Source:MGI Symbol;Acc:MGI:1349430]
Kcnk3	534.289	-0.332584	0.144232	-2.3059	0.0211162	0.661007	596.368	472.21	0.791811	Not Sig	ENSMUSG00000049265	protein_coding	nonsignificant	potassium channel, subfamily K, member 3 [Source:MGI Symbol;Acc:MGI:1100509]
Gm44288	93.9895	0.668332	0.28987	2.30563	0.0211314	0.661007	72.4738	115.505	1.59375	Not Sig	ENSMUSG00000107483	TEC	nonsignificant	predicted gene, 44288 [Source:MGI Symbol;Acc:MGI:5690680]
Folr1	202.497	2.82302	1.22449	2.30546	0.0211409	0.661007	50.1925	354.801	7.06882	Not Sig	ENSMUSG00000001827	protein_coding	nonsignificant	folate receptor alpha [Source:MGI Symbol;Acc:MGI:95568]
Brsk1	9779.86	-0.17825	0.0773617	-2.30411	0.0212163	0.661779	10385	9174.74	0.883461	Not Sig	ENSMUSG00000035390	protein_coding	nonsignificant	BR serine/threonine kinase 1 [Source:MGI Symbol;Acc:MGI:2685946]
Dpy19l1	3683.7	-0.223358	0.096935	-2.3042	0.0212115	0.661779	3970.38	3397.02	0.855589	Not Sig	ENSMUSG00000043067	protein_coding	nonsignificant	dpy-19 like C-mannosyltransferase 1 [Source:MGI Symbol;Acc:MGI:1915685]
Grb10	1982.55	-0.24762	0.10745	-2.30451	0.0211941	0.661779	2152.98	1812.12	0.841681	Not Sig	ENSMUSG00000020176	protein_coding	nonsignificant	growth factor receptor bound protein 10 [Source:MGI Symbol;Acc:MGI:103232]
Gm48713	192.451	0.561566	0.243773	2.30365	0.0212425	0.662069	155.392	229.51	1.47698	Not Sig	ENSMUSG00000113154	TEC	nonsignificant	predicted gene, 48713 [Source:MGI Symbol;Acc:MGI:6098359]
Gm16337	31.7744	1.04785	0.455039	2.30278	0.0212912	0.66306	20.6312	42.9177	2.08023	Not Sig	ENSMUSG00000089794	lncRNA	nonsignificant	predicted gene 16337 [Source:MGI Symbol;Acc:MGI:3840131]
Gm42608	1019.64	0.248744	0.108054	2.30203	0.0213333	0.663316	931.392	1107.88	1.18949	Not Sig	ENSMUSG00000106651	TEC	nonsignificant	predicted gene 42608 [Source:MGI Symbol;Acc:MGI:5662745]
9530003O04Rik	388.87	0.384285	0.166914	2.30229	0.0213186	0.663316	336.743	440.996	1.30959	Not Sig	ENSMUSG00000102267	TEC	nonsignificant	RIKEN cDNA 9530003O04 gene [Source:MGI Symbol;Acc:MGI:1924641]
Gm42445	214.916	0.52412	0.227768	2.30111	0.0213853	0.663723	175.692	254.141	1.44651	Not Sig	ENSMUSG00000106411	TEC	nonsignificant	predicted gene 42445 [Source:MGI Symbol;Acc:MGI:5662582]
Pianp	4256.92	-0.209011	0.0908365	-2.30096	0.021394	0.663723	4566.34	3947.5	0.864479	Not Sig	ENSMUSG00000030329	protein_coding	nonsignificant	PILR alpha associated neural protein [Source:MGI Symbol;Acc:MGI:2441908]
Tomm20	15813.2	-0.150423	0.0653758	-2.3009	0.0213973	0.663723	16637.6	14988.8	0.9009	Not Sig	ENSMUSG00000093904	protein_coding	nonsignificant	translocase of outer mitochondrial membrane 20 [Source:MGI Symbol;Acc:MGI:1915202]
Gm37061	62.8497	0.8042	0.349584	2.30045	0.0214228	0.663988	45.6898	80.0097	1.75115	Not Sig	ENSMUSG00000103809	TEC	nonsignificant	predicted gene, 37061 [Source:MGI Symbol;Acc:MGI:5610289]
Myo5a	48567.2	-0.147026	0.0639349	-2.29961	0.0214702	0.664404	51039.9	46094.4	0.903104	Not Sig	ENSMUSG00000034593	protein_coding	nonsignificant	myosin VA [Source:MGI Symbol;Acc:MGI:105976]
Dnajc15	3440.33	-0.166098	0.0722247	-2.29974	0.021463	0.664404	3638.39	3242.27	0.891128	Not Sig	ENSMUSG00000022013	protein_coding	nonsignificant	DnaJ heat shock protein family (Hsp40) member C15 [Source:MGI Symbol;Acc:MGI:1913398]
A330015K06Rik	653.896	0.380205	0.165452	2.29797	0.0215636	0.664507	567.959	739.833	1.30262	Not Sig	ENSMUSG00000104093	lncRNA	nonsignificant	RIKEN cDNA A330015K06 gene [Source:MGI Symbol;Acc:MGI:2443553]
Gm21168	110.705	0.614063	0.26721	2.29805	0.021559	0.664507	87.6881	133.722	1.52497	Not Sig	ENSMUSG00000104651	processed_pseudogene	nonsignificant	predicted gene, 21168 [Source:MGI Symbol;Acc:MGI:5434523]
Cops6	2763.41	-0.193109	0.0839925	-2.29912	0.0214982	0.664507	2948.23	2578.6	0.874627	Not Sig	ENSMUSG00000019494	protein_coding	nonsignificant	COP9 signalosome subunit 6 [Source:MGI Symbol;Acc:MGI:1349439]
Gm47171	83.6262	0.736774	0.320632	2.29788	0.0215685	0.664507	62.6931	104.559	1.66779	Not Sig	ENSMUSG00000111340	TEC	nonsignificant	predicted gene, 47171 [Source:MGI Symbol;Acc:MGI:6095951]
Or10h5	398.087	0.34662	0.150851	2.29776	0.0215754	0.664507	349.833	446.342	1.27587	Not Sig	ENSMUSG00000096169	protein_coding	nonsignificant	olfactory receptor family 10 subfamily H member 5 [Source:MGI Symbol;Acc:MGI:3782645]
Gm14827	357.734	0.390092	0.169768	2.2978	0.0215731	0.664507	309.606	405.863	1.3109	Not Sig	ENSMUSG00000084904	lncRNA	nonsignificant	predicted gene 14827 [Source:MGI Symbol;Acc:MGI:3705192]
Gm43260	173.406	0.577816	0.25203	2.29265	0.0218682	0.664823	138.811	208.002	1.49846	Not Sig	ENSMUSG00000105933	lncRNA	nonsignificant	predicted gene 43260 [Source:MGI Symbol;Acc:MGI:5663397]
1700015C17Rik	19.7836	1.33911	0.584008	2.29296	0.0218502	0.664823	11.1705	28.3968	2.54212	Not Sig	ENSMUSG00000104908	lncRNA	nonsignificant	RIKEN cDNA 1700015C17 gene [Source:MGI Symbol;Acc:MGI:1924178]
Gm11872	105.581	0.606406	0.264534	2.29236	0.021885	0.664823	83.7991	127.363	1.51986	Not Sig	ENSMUSG00000086017	lncRNA	nonsignificant	predicted gene 11872 [Source:MGI Symbol;Acc:MGI:3649333]
Gm11893	26.8368	1.16535	0.508036	2.29384	0.0217998	0.664823	16.6533	37.0202	2.223	Not Sig	ENSMUSG00000081789	processed_pseudogene	nonsignificant	predicted gene 11893 [Source:MGI Symbol;Acc:MGI:3651418]
Gm43680	58.928	0.807368	0.352217	2.29225	0.0218913	0.664823	42.8212	75.0348	1.75228	Not Sig	ENSMUSG00000106559	processed_pseudogene	nonsignificant	predicted gene 43680 [Source:MGI Symbol;Acc:MGI:5663817]
C530043K16Rik	129.905	0.550225	0.239661	2.29585	0.0216846	0.664823	105.19	154.619	1.4699	Not Sig	ENSMUSG00000106706	TEC	nonsignificant	RIKEN cDNA C530043K16 gene [Source:MGI Symbol;Acc:MGI:2444587]
Vkorc1l1	5293.41	-0.164656	0.0718159	-2.29275	0.0218624	0.664823	5595.53	4991.28	0.892012	Not Sig	ENSMUSG00000066735	protein_coding	nonsignificant	vitamin K epoxide reductase complex, subunit 1-like 1 [Source:MGI Symbol;Acc:MGI:1916818]
Bckdha	264.395	-0.37997	0.165634	-2.29403	0.0217885	0.664823	298.539	230.252	0.771262	Not Sig	ENSMUSG00000060376	protein_coding	nonsignificant	branched chain ketoacid dehydrogenase E1, alpha polypeptide [Source:MGI Symbol;Acc:MGI:107701]
Mki67	768.26	0.29846	0.130194	2.29242	0.0218813	0.664823	688.235	848.285	1.23255	Not Sig	ENSMUSG00000031004	protein_coding	nonsignificant	antigen identified by monoclonal antibody Ki 67 [Source:MGI Symbol;Acc:MGI:106035]
Gm44798	1034.85	0.984647	0.42906	2.29489	0.0217394	0.664823	694.771	1374.92	1.97896	Not Sig	ENSMUSG00000109139	TEC	nonsignificant	predicted gene 44798 [Source:MGI Symbol;Acc:MGI:5753374]
Gria4	5608.33	-0.178385	0.0777462	-2.29446	0.0217643	0.664823	5953.8	5262.87	0.883951	Not Sig	ENSMUSG00000025892	protein_coding	nonsignificant	glutamate receptor, ionotropic, AMPA4 (alpha 4) [Source:MGI Symbol;Acc:MGI:95811]
Tmem115	999.775	-0.275173	0.119926	-2.29452	0.0217606	0.664823	1095.75	903.795	0.824815	Not Sig	ENSMUSG00000010045	protein_coding	nonsignificant	transmembrane protein 115 [Source:MGI Symbol;Acc:MGI:1930765]
Cck	6121.59	-0.205766	0.0896704	-2.29469	0.0217508	0.664823	6559.2	5683.97	0.866565	Not Sig	ENSMUSG00000032532	protein_coding	nonsignificant	cholecystokinin [Source:MGI Symbol;Acc:MGI:88297]
Fasn	17646.8	-0.200903	0.0876056	-2.29327	0.0218326	0.664823	18875.4	16418.1	0.869814	Not Sig	ENSMUSG00000025153	protein_coding	nonsignificant	fatty acid synthase [Source:MGI Symbol;Acc:MGI:95485]
Gm45949	6.2347	-2.64024	1.15095	-2.29397	0.0217924	0.664823	10.8311	1.63829	0.151258	Not Sig	ENSMUSG00000113860	lncRNA	nonsignificant	predicted gene, 45949 [Source:MGI Symbol;Acc:MGI:5825586]
Plekhh2	1022.4	0.240606	0.104748	2.297	0.0216188	0.664823	936.708	1108.09	1.18297	Not Sig	ENSMUSG00000040852	protein_coding	nonsignificant	pleckstrin homology domain containing, family H (with MyTH4 domain) member 2 [Source:MGI Symbol;Acc:MGI:2146813]
Gm8189	52.9205	0.832042	0.362366	2.29614	0.0216681	0.664823	37.8643	67.9767	1.79527	Not Sig	ENSMUSG00000110298	transcribed_unprocessed_pseudogene	nonsignificant	predicted gene 8189 [Source:MGI Symbol;Acc:MGI:3779786]
Syp	25116.4	-0.168982	0.0736705	-2.29375	0.021805	0.664823	26587.1	23645.6	0.889367	Not Sig	ENSMUSG00000031144	protein_coding	nonsignificant	synaptophysin [Source:MGI Symbol;Acc:MGI:98467]
Epm2a	2262.02	-0.189392	0.0826607	-2.2912	0.0219518	0.665629	2410.94	2113.1	0.876463	Not Sig	ENSMUSG00000055493	protein_coding	nonsignificant	epilepsy, progressive myoclonic epilepsy, type 2 gene alpha [Source:MGI Symbol;Acc:MGI:1341085]
Gm20242	243.576	0.599527	0.261643	2.29139	0.0219408	0.665629	193.893	293.258	1.51248	Not Sig	ENSMUSG00000114503	TEC	nonsignificant	predicted gene, 20242 [Source:MGI Symbol;Acc:MGI:5012427]
Rps26-ps1	550.824	0.385897	0.16853	2.28978	0.0220342	0.667213	476.994	624.653	1.30956	Not Sig	ENSMUSG00000059775	transcribed_processed_pseudogene	nonsignificant	ribosomal protein S26, pseudogene 1 [Source:MGI Symbol;Acc:MGI:3704322]
Gm16169	63.8729	0.758121	0.331099	2.28971	0.0220382	0.667213	47.2853	80.4606	1.7016	Not Sig	ENSMUSG00000089907	lncRNA	nonsignificant	predicted gene 16169 [Source:MGI Symbol;Acc:MGI:3802011]
Gm48646	33.3554	0.989524	0.432398	2.28845	0.0221111	0.668905	22.3501	44.3607	1.98481	Not Sig	ENSMUSG00000111069	lncRNA	nonsignificant	predicted gene, 48646 [Source:MGI Symbol;Acc:MGI:6098253]
Dtx1	3680.57	-0.184012	0.0804324	-2.28779	0.0221499	0.66956	3916.05	3445.09	0.879736	Not Sig	ENSMUSG00000029603	protein_coding	nonsignificant	deltex 1, E3 ubiquitin ligase [Source:MGI Symbol;Acc:MGI:1352744]
Gm5064	51.813	0.84149	0.367897	2.2873	0.0221785	0.669907	37.3349	66.2912	1.77558	Not Sig	ENSMUSG00000117416	processed_pseudogene	nonsignificant	predicted gene 5064 [Source:MGI Symbol;Acc:MGI:3649060]
Tgfbr3	2035.6	0.212624	0.092993	2.28646	0.0222276	0.670464	1886.35	2184.85	1.15824	Not Sig	ENSMUSG00000029287	protein_coding	nonsignificant	transforming growth factor, beta receptor III [Source:MGI Symbol;Acc:MGI:104637]
Cyfip2	63924.8	-0.152127	0.0665357	-2.28639	0.0222312	0.670464	67292.3	60557.2	0.899912	Not Sig	ENSMUSG00000020340	protein_coding	nonsignificant	cytoplasmic FMR1 interacting protein 2 [Source:MGI Symbol;Acc:MGI:1924134]
Gm37861	284.862	0.480428	0.210245	2.28509	0.0223077	0.671374	237.316	332.407	1.40069	Not Sig	ENSMUSG00000103762	TEC	nonsignificant	predicted gene, 37861 [Source:MGI Symbol;Acc:MGI:5611089]
Bche	817.243	0.299384	0.131072	2.28412	0.0223643	0.671374	731.85	902.636	1.23336	Not Sig	ENSMUSG00000027792	protein_coding	nonsignificant	butyrylcholinesterase [Source:MGI Symbol;Acc:MGI:894278]
Gm43876	231.126	0.548658	0.240179	2.28437	0.0223497	0.671374	187.103	275.15	1.47058	Not Sig	ENSMUSG00000108055	TEC	nonsignificant	predicted gene, 43876 [Source:MGI Symbol;Acc:MGI:5690268]
4930488L21Rik	648.233	0.295581	0.129364	2.28487	0.0223203	0.671374	581.109	715.357	1.23102	Not Sig	ENSMUSG00000097520	lncRNA	nonsignificant	RIKEN cDNA 4930488L21 gene [Source:MGI Symbol;Acc:MGI:1923059]
C1qtnf2	30.9528	1.04294	0.456376	2.28527	0.0222972	0.671374	20.1579	41.7478	2.07104	Not Sig	ENSMUSG00000046491	protein_coding	nonsignificant	C1q and tumor necrosis factor related protein 2 [Source:MGI Symbol;Acc:MGI:1916433]
D230049E03Rik	522.441	0.324382	0.142009	2.28423	0.022358	0.671374	463.411	581.471	1.25476	Not Sig	ENSMUSG00000113196	TEC	nonsignificant	RIKEN cDNA D230049E03 gene [Source:MGI Symbol;Acc:MGI:2443283]
Gm4787	234.385	0.529746	0.231967	2.28371	0.0223883	0.67158	191.879	276.891	1.44305	Not Sig	ENSMUSG00000072974	protein_coding	nonsignificant	predicted gene 4787 [Source:MGI Symbol;Acc:MGI:3646380]
Gm37588	252.858	0.437114	0.191506	2.28252	0.0224589	0.671641	214.175	291.541	1.36123	Not Sig	ENSMUSG00000104239	TEC	nonsignificant	predicted gene, 37588 [Source:MGI Symbol;Acc:MGI:5610816]
Csrnp3	12276.8	-0.151266	0.0662625	-2.28282	0.0224409	0.671641	12920.7	11633	0.900337	Not Sig	ENSMUSG00000044647	protein_coding	nonsignificant	cysteine-serine-rich nuclear protein 3 [Source:MGI Symbol;Acc:MGI:1925021]
Smim43	205.688	-0.463446	0.203016	-2.2828	0.0224421	0.671641	237.896	173.48	0.729226	Not Sig	ENSMUSG00000085007	protein_coding	nonsignificant	small integral membrane protein 43 [Source:MGI Symbol;Acc:MGI:3650339]
2610027K06Rik	33.4489	1.01129	0.442962	2.28301	0.0224297	0.671641	22.2665	44.6313	2.00441	Not Sig	ENSMUSG00000087013	lncRNA	nonsignificant	RIKEN cDNA 2610027K06 gene [Source:MGI Symbol;Acc:MGI:1917159]
C430019N01Rik	19.8319	1.29703	0.568367	2.28202	0.022488	0.671911	11.4445	28.2194	2.46575	Not Sig	ENSMUSG00000105801	TEC	nonsignificant	RIKEN cDNA C430019N01 gene [Source:MGI Symbol;Acc:MGI:3028058]
Fam43a	360.359	-0.396082	0.173585	-2.28178	0.0225023	0.671911	410.686	310.032	0.754913	Not Sig	ENSMUSG00000046546	protein_coding	nonsignificant	family with sequence similarity 43, member A [Source:MGI Symbol;Acc:MGI:2676309]
Gm42541	51.13	0.94575	0.414679	2.28068	0.0225674	0.673124	34.9747	67.2854	1.92383	Not Sig	ENSMUSG00000104622	TEC	nonsignificant	predicted gene 42541 [Source:MGI Symbol;Acc:MGI:5662678]
Gm48871	292.137	0.575668	0.252429	2.28051	0.0225773	0.673124	234.558	349.715	1.49095	Not Sig	ENSMUSG00000112948	TEC	nonsignificant	predicted gene, 48871 [Source:MGI Symbol;Acc:MGI:6098618]
Gm36251	35.8318	-0.986345	0.432994	-2.27796	0.0227288	0.677123	47.7192	23.9444	0.501777	Not Sig	ENSMUSG00000110996	lncRNA	nonsignificant	predicted gene, 36251 [Source:MGI Symbol;Acc:MGI:5595410]
Dnm1	56187	-0.152285	0.0669263	-2.27542	0.0228809	0.677686	59150.6	53223.4	0.899794	Not Sig	ENSMUSG00000026825	protein_coding	nonsignificant	dynamin 1 [Source:MGI Symbol;Acc:MGI:107384]
Pgap4	2593.04	-0.194078	0.0853295	-2.27446	0.0229386	0.677686	2768.59	2417.5	0.87319	Not Sig	ENSMUSG00000039611	protein_coding	nonsignificant	post-GPI attachment to proteins GalNAc transferase 4 [Source:MGI Symbol;Acc:MGI:1914313]
Col9a2	209.642	-0.433485	0.190574	-2.27463	0.022928	0.677686	241.451	177.834	0.736521	Not Sig	ENSMUSG00000028626	protein_coding	nonsignificant	collagen, type IX, alpha 2 [Source:MGI Symbol;Acc:MGI:88466]
Angptl7	115.232	0.548658	0.241261	2.27413	0.0229581	0.677686	93.595	136.868	1.46235	Not Sig	ENSMUSG00000028989	protein_coding	nonsignificant	angiopoietin-like 7 [Source:MGI Symbol;Acc:MGI:3605801]
Arap2	10851.9	-0.190253	0.0837109	-2.27274	0.023042	0.677686	11567.1	10136.6	0.876328	Not Sig	ENSMUSG00000037999	protein_coding	nonsignificant	ArfGAP with RhoGAP domain, ankyrin repeat and PH domain 2 [Source:MGI Symbol;Acc:MGI:2684416]
2810432F15Rik	53.1469	0.854193	0.375202	2.27662	0.0228087	0.677686	37.8429	68.4508	1.80881	Not Sig	ENSMUSG00000104987	lncRNA	nonsignificant	RIKEN cDNA 2810432F15 gene [Source:MGI Symbol;Acc:MGI:1917213]
Gm43875	251.67	0.474013	0.208529	2.27312	0.0230188	0.677686	210.426	292.913	1.39201	Not Sig	ENSMUSG00000107454	TEC	nonsignificant	predicted gene, 43875 [Source:MGI Symbol;Acc:MGI:5690267]
Scamp5	13529	-0.180834	0.0794642	-2.27567	0.0228659	0.677686	14377.2	12680.8	0.882008	Not Sig	ENSMUSG00000040722	protein_coding	nonsignificant	secretory carrier membrane protein 5 [Source:MGI Symbol;Acc:MGI:1928948]
Vill	97.1254	-0.680269	0.299131	-2.27415	0.022957	0.677686	119.374	74.8763	0.627239	Not Sig	ENSMUSG00000038775	protein_coding	nonsignificant	villin-like [Source:MGI Symbol;Acc:MGI:1201781]
Epyc	158.58	0.510453	0.224333	2.27542	0.0228806	0.677686	130.719	186.442	1.42628	Not Sig	ENSMUSG00000019936	protein_coding	nonsignificant	epiphycan [Source:MGI Symbol;Acc:MGI:107942]
Fat2	118.575	-0.579449	0.254903	-2.27321	0.0230134	0.677686	141.61	95.5401	0.674673	Not Sig	ENSMUSG00000055333	protein_coding	nonsignificant	FAT atypical cadherin 2 [Source:MGI Symbol;Acc:MGI:2685369]
4930412M03Rik	167.511	0.532279	0.234188	2.27287	0.0230341	0.677686	136.748	198.274	1.44992	Not Sig	ENSMUSG00000051008	lncRNA	nonsignificant	RIKEN cDNA 4930412M03 gene [Source:MGI Symbol;Acc:MGI:2443570]
Blmh	2875.65	-0.186339	0.0819731	-2.27317	0.0230162	0.677686	3060.8	2690.5	0.87902	Not Sig	ENSMUSG00000020840	protein_coding	nonsignificant	bleomycin hydrolase [Source:MGI Symbol;Acc:MGI:1345186]
Gm11655	153.189	0.62508	0.274827	2.27445	0.0229388	0.677686	120.899	185.479	1.53416	Not Sig	ENSMUSG00000084978	lncRNA	nonsignificant	predicted gene 11655 [Source:MGI Symbol;Acc:MGI:3650998]
Gm47076	64.6106	-0.719495	0.316146	-2.27583	0.0228559	0.677686	80.4956	48.7256	0.60532	Not Sig	ENSMUSG00000113645	lncRNA	nonsignificant	predicted gene, 47076 [Source:MGI Symbol;Acc:MGI:6095797]
Gm49199	65.3217	0.710374	0.312037	2.27657	0.0228118	0.677686	49.4993	81.1442	1.6393	Not Sig	ENSMUSG00000115564	TEC	nonsignificant	predicted gene, 49199 [Source:MGI Symbol;Acc:MGI:6118645]
Lzts2	637.038	-0.28878	0.127049	-2.27299	0.0230267	0.677686	701.06	573.015	0.817355	Not Sig	ENSMUSG00000035342	protein_coding	nonsignificant	leucine zipper, putative tumor suppressor 2 [Source:MGI Symbol;Acc:MGI:2385095]
Mdm1	478.176	0.324783	0.142983	2.27148	0.0231178	0.679406	424.185	532.167	1.25456	Not Sig	ENSMUSG00000020212	protein_coding	nonsignificant	MDM1 nuclear protein [Source:MGI Symbol;Acc:MGI:96951]
Gm21680	129.257	0.666548	0.293495	2.27107	0.0231425	0.679488	100.274	158.24	1.57807	Not Sig	ENSMUSG00000106627	protein_coding	nonsignificant	predicted gene, 21680 [Source:MGI Symbol;Acc:MGI:5435035]
Gm34567	568.948	0.446364	0.196561	2.27086	0.0231553	0.679488	481.254	656.642	1.36444	Not Sig	ENSMUSG00000117254	lncRNA	nonsignificant	predicted gene, 34567 [Source:MGI Symbol;Acc:MGI:5593726]
Car14	391.517	0.366401	0.161411	2.26999	0.0232082	0.679592	342.092	440.942	1.28896	Not Sig	ENSMUSG00000038526	protein_coding	nonsignificant	carbonic anhydrase 14 [Source:MGI Symbol;Acc:MGI:1344341]
Cux1	3899.79	-0.185507	0.081745	-2.26934	0.0232478	0.679592	4149.71	3649.88	0.87955	Not Sig	ENSMUSG00000029705	protein_coding	nonsignificant	cut-like homeobox 1 [Source:MGI Symbol;Acc:MGI:88568]
Vamp8	206.907	0.43492	0.191672	2.26909	0.023263	0.679592	175.984	237.83	1.35143	Not Sig	ENSMUSG00000050732	protein_coding	nonsignificant	vesicle-associated membrane protein 8 [Source:MGI Symbol;Acc:MGI:1336882]
Gm20648	60.4953	0.755865	0.332982	2.26999	0.0232084	0.679592	44.9286	76.0621	1.69295	Not Sig	ENSMUSG00000093779	processed_pseudogene	nonsignificant	predicted gene 20648 [Source:MGI Symbol;Acc:MGI:5313095]
Zmiz1	9404.84	-0.152137	0.067032	-2.26961	0.0232311	0.679592	9901.23	8908.45	0.899731	Not Sig	ENSMUSG00000007817	protein_coding	nonsignificant	zinc finger, MIZ-type containing 1 [Source:MGI Symbol;Acc:MGI:3040693]
Grk2	8676.23	-0.201887	0.0889443	-2.26982	0.0232187	0.679592	9284.52	8067.94	0.868967	Not Sig	ENSMUSG00000024858	protein_coding	nonsignificant	G protein-coupled receptor kinase 2 [Source:MGI Symbol;Acc:MGI:87940]
Astn2	2500.95	-0.227858	0.10046	-2.26814	0.0233206	0.679609	2698.42	2303.48	0.853639	Not Sig	ENSMUSG00000028373	protein_coding	nonsignificant	astrotactin 2 [Source:MGI Symbol;Acc:MGI:1889277]
Ephx4	1454.34	-0.212225	0.0936349	-2.26652	0.0234198	0.679609	1561.96	1346.72	0.862203	Not Sig	ENSMUSG00000033805	protein_coding	nonsignificant	epoxide hydrolase 4 [Source:MGI Symbol;Acc:MGI:2686228]
Gm44234	116.015	0.567453	0.25023	2.26773	0.023346	0.679609	93.3056	138.725	1.48678	Not Sig	ENSMUSG00000108057	TEC	nonsignificant	predicted gene, 44234 [Source:MGI Symbol;Acc:MGI:5690626]
Gm44708	635.004	0.323268	0.142626	2.26655	0.0234177	0.679609	563.879	706.129	1.25227	Not Sig	ENSMUSG00000108597	TEC	nonsignificant	predicted gene 44708 [Source:MGI Symbol;Acc:MGI:5753284]
Gm44667	714.969	0.380382	0.167737	2.26773	0.0233459	0.679609	620.505	809.433	1.30447	Not Sig	ENSMUSG00000109539	TEC	nonsignificant	predicted gene 44667 [Source:MGI Symbol;Acc:MGI:5753243]
Gm16485	1044.82	-0.233124	0.102842	-2.26681	0.0234021	0.679609	1128.84	960.797	0.851139	Not Sig	ENSMUSG00000078117	TEC	nonsignificant	predicted gene 16485 [Source:MGI Symbol;Acc:MGI:3642771]
Pcsk1	2584.06	-0.311422	0.137373	-2.26697	0.0233918	0.679609	2863.75	2304.38	0.804673	Not Sig	ENSMUSG00000021587	protein_coding	nonsignificant	proprotein convertase subtilisin/kexin type 1 [Source:MGI Symbol;Acc:MGI:97511]
Gm16318	7.01278	2.47136	1.08966	2.26802	0.0233282	0.679609	2.18484	11.8407	5.4195	Not Sig	ENSMUSG00000089972	processed_pseudogene	nonsignificant	predicted gene 16318 [Source:MGI Symbol;Acc:MGI:3826563]
Prickle1	5963.82	-0.17568	0.0774949	-2.26698	0.0233913	0.679609	6327.29	5600.34	0.885109	Not Sig	ENSMUSG00000036158	protein_coding	nonsignificant	prickle planar cell polarity protein 1 [Source:MGI Symbol;Acc:MGI:1916034]
Gm47373	45.7567	0.86792	0.383	2.26611	0.0234447	0.679828	32.3786	59.1347	1.82635	Not Sig	ENSMUSG00000113454	lncRNA	nonsignificant	predicted gene, 47373 [Source:MGI Symbol;Acc:MGI:6096286]
Gas7	44001.3	-0.16235	0.0716573	-2.26565	0.023473	0.680143	46475	41527.6	0.893549	Not Sig	ENSMUSG00000033066	protein_coding	nonsignificant	growth arrest specific 7 [Source:MGI Symbol;Acc:MGI:1202388]
	40.2211	1.01266	0.447421	2.26334	0.0236147	0.682734	26.5946	53.8476	2.02475	Not Sig	ENSMUSG00000103174		nonsignificant
Gm37006	498.544	1.03476	0.457627	2.26114	0.0237508	0.682734	326.946	670.141	2.0497	Not Sig	ENSMUSG00000103885	TEC	nonsignificant	predicted gene, 37006 [Source:MGI Symbol;Acc:MGI:5610234]
Gm38377	309.898	0.402868	0.17803	2.26292	0.0236404	0.682734	266.954	352.841	1.32173	Not Sig	ENSMUSG00000102662	TEC	nonsignificant	predicted gene, 38377 [Source:MGI Symbol;Acc:MGI:5611605]
Cfap74	775.148	0.279125	0.123478	2.26052	0.0237891	0.682734	700.422	849.873	1.21337	Not Sig	ENSMUSG00000078490	protein_coding	nonsignificant	cilia and flagella associated protein 74 [Source:MGI Symbol;Acc:MGI:1917130]
Gm44846	1290.49	0.344783	0.152495	2.26095	0.0237625	0.682734	1136.61	1444.37	1.27077	Not Sig	ENSMUSG00000108993	TEC	nonsignificant	predicted gene 44846 [Source:MGI Symbol;Acc:MGI:5753422]
Gm45534	64.1373	0.806757	0.356744	2.26144	0.023732	0.682734	46.5684	81.7061	1.75454	Not Sig	ENSMUSG00000110405	TEC	nonsignificant	predicted gene 45534 [Source:MGI Symbol;Acc:MGI:5791370]
Gm47321	2.07408	4.67646	2.06691	2.26254	0.0236643	0.682734	0	4.14816	Inf	Not Sig	ENSMUSG00000111451	processed_pseudogene	nonsignificant	predicted gene, 47321 [Source:MGI Symbol;Acc:MGI:6096205]
9530059O14Rik	3422.88	0.265914	0.117593	2.26132	0.0237395	0.682734	3108.37	3737.39	1.20236	Not Sig	ENSMUSG00000097736	lncRNA	nonsignificant	RIKEN cDNA 9530059O14 gene [Source:MGI Symbol;Acc:MGI:2442421]
Obscn	323.321	0.349024	0.15438	2.26082	0.0237704	0.682734	284.818	361.824	1.27037	Not Sig	ENSMUSG00000061462	protein_coding	nonsignificant	obscurin, cytoskeletal calmodulin and titin-interacting RhoGEF [Source:MGI Symbol;Acc:MGI:2681862]
Gm49309	79.657	0.813149	0.359502	2.26188	0.0237049	0.682734	57.6073	101.707	1.76552	Not Sig	ENSMUSG00000115812	transcribed_processed_pseudogene	nonsignificant	predicted gene, 49309 [Source:MGI Symbol;Acc:MGI:6118812]
Faim2	17439.6	-0.192657	0.0852259	-2.26055	0.0237874	0.682734	18604.6	16274.5	0.874757	Not Sig	ENSMUSG00000023011	protein_coding	nonsignificant	Fas apoptotic inhibitory molecule 2 [Source:MGI Symbol;Acc:MGI:1919643]
Bmerb1	7675.48	-0.167232	0.0738965	-2.26306	0.023632	0.682734	8121.59	7229.37	0.890142	Not Sig	ENSMUSG00000044117	protein_coding	nonsignificant	bMERB domain containing 1 [Source:MGI Symbol;Acc:MGI:1914504]
Htr2c	3537.04	0.674307	0.29829	2.26058	0.0237854	0.682734	2725.11	4348.96	1.59588	Not Sig	ENSMUSG00000041380	protein_coding	nonsignificant	5-hydroxytryptamine (serotonin) receptor 2C [Source:MGI Symbol;Acc:MGI:96281]
Stx1a	2479.18	-0.193006	0.0854212	-2.25946	0.0238545	0.684109	2645.97	2312.4	0.873931	Not Sig	ENSMUSG00000007207	protein_coding	nonsignificant	syntaxin 1A (brain) [Source:MGI Symbol;Acc:MGI:109355]
Gm43256	213.085	0.583927	0.258597	2.25806	0.0239421	0.684616	170.511	255.658	1.49936	Not Sig	ENSMUSG00000105818	lncRNA	nonsignificant	predicted gene 43256 [Source:MGI Symbol;Acc:MGI:5663393]
Gm45343	143.081	0.586345	0.259617	2.2585	0.0239147	0.684616	114.174	171.988	1.50636	Not Sig	ENSMUSG00000110088	TEC	nonsignificant	predicted gene 45343 [Source:MGI Symbol;Acc:MGI:5791179]
Bcas3os1	105.067	0.619136	0.274123	2.25861	0.0239076	0.684616	82.8531	127.282	1.53623	Not Sig	ENSMUSG00000086199	lncRNA	nonsignificant	BCAS3 microtubule associated cell migration factor, opposite strand 1 [Source:MGI Symbol;Acc:MGI:1918739]
Fzd3	13663.2	-0.181696	0.0804619	-2.25817	0.0239352	0.684616	14523.2	12803.2	0.881568	Not Sig	ENSMUSG00000007989	protein_coding	nonsignificant	frizzled class receptor 3 [Source:MGI Symbol;Acc:MGI:108476]
Nhlh1	50.8979	0.81713	0.362095	2.25667	0.0240287	0.686245	36.7758	65.02	1.76801	Not Sig	ENSMUSG00000051251	protein_coding	nonsignificant	nescient helix loop helix 1 [Source:MGI Symbol;Acc:MGI:98481]
Ttl	2972.52	-0.183064	0.0811243	-2.25658	0.0240342	0.686245	3161.03	2784.01	0.880729	Not Sig	ENSMUSG00000027394	protein_coding	nonsignificant	tubulin tyrosine ligase [Source:MGI Symbol;Acc:MGI:1916987]
Paqr7	1778.36	-0.226678	0.100471	-2.25615	0.0240614	0.686522	1919.17	1637.55	0.853263	Not Sig	ENSMUSG00000037348	protein_coding	nonsignificant	progestin and adipoQ receptor family member VII [Source:MGI Symbol;Acc:MGI:1919154]
Gm1979	85.7628	0.688694	0.305349	2.25544	0.024106	0.686793	65.8424	105.683	1.60509	Not Sig	ENSMUSG00000091049	protein_coding	nonsignificant	predicted gene 1979 [Source:MGI Symbol;Acc:MGI:3780148]
Lrp3	2464.33	-0.202691	0.089859	-2.25566	0.0240919	0.686793	2637.86	2290.79	0.868427	Not Sig	ENSMUSG00000001802	protein_coding	nonsignificant	low density lipoprotein receptor-related protein 3 [Source:MGI Symbol;Acc:MGI:3584516]
Lrtm2	1535.02	-0.220416	0.097744	-2.25503	0.0241311	0.687009	1653.41	1416.63	0.856793	Not Sig	ENSMUSG00000055003	protein_coding	nonsignificant	leucine-rich repeats and transmembrane domains 2 [Source:MGI Symbol;Acc:MGI:2141485]
Maoa	2095.5	-0.185591	0.0823198	-2.25451	0.0241642	0.687451	2229.44	1961.56	0.879843	Not Sig	ENSMUSG00000025037	protein_coding	nonsignificant	monoamine oxidase A [Source:MGI Symbol;Acc:MGI:96915]
Cldn12	2092.81	-0.179548	0.0796545	-2.25408	0.0241911	0.687715	2222.6	1963.01	0.883205	Not Sig	ENSMUSG00000046798	protein_coding	nonsignificant	claudin 12 [Source:MGI Symbol;Acc:MGI:1929288]
Pgap1	3978.19	-0.182335	0.0809157	-2.25339	0.0242343	0.688443	4230.35	3726.02	0.880785	Not Sig	ENSMUSG00000073678	protein_coding	nonsignificant	post-GPI attachment to proteins 1 [Source:MGI Symbol;Acc:MGI:2443342]
Gm37649	156.481	0.603208	0.267763	2.25277	0.0242736	0.688561	123.784	189.178	1.5283	Not Sig	ENSMUSG00000102257	TEC	nonsignificant	predicted gene, 37649 [Source:MGI Symbol;Acc:MGI:5610877]
A1bg	2.51718	4.94821	2.19632	2.25296	0.0242619	0.688561	0	5.03436	Inf	Not Sig	ENSMUSG00000022347	protein_coding	nonsignificant	alpha-1-B glycoprotein [Source:MGI Symbol;Acc:MGI:2152878]
Gm42716	51.0312	0.933691	0.41453	2.25241	0.0242964	0.68871	34.9357	67.1267	1.92144	Not Sig	ENSMUSG00000105264	lncRNA	nonsignificant	predicted gene 42716 [Source:MGI Symbol;Acc:MGI:5662853]
Col27a1	410.76	0.354457	0.157391	2.25208	0.0243172	0.688799	361.483	460.038	1.27264	Not Sig	ENSMUSG00000045672	protein_coding	nonsignificant	collagen, type XXVII, alpha 1 [Source:MGI Symbol;Acc:MGI:2672118]
Sars1	5805.32	-0.15733	0.0698751	-2.25159	0.0243483	0.689002	6122.7	5487.94	0.896327	Not Sig	ENSMUSG00000068739	protein_coding	nonsignificant	seryl-tRNA synthetase 1 [Source:MGI Symbol;Acc:MGI:102809]
5430434F05Rik	289.604	0.373356	0.165862	2.251	0.0243856	0.689002	252.269	326.938	1.29599	Not Sig	ENSMUSG00000108780	TEC	nonsignificant	RIKEN cDNA 5430434F05 gene [Source:MGI Symbol;Acc:MGI:1925345]
Ap1b1	6883.73	-0.175813	0.0781064	-2.25095	0.024389	0.689002	7304.21	6463.24	0.884865	Not Sig	ENSMUSG00000009090	protein_coding	nonsignificant	adaptor protein complex AP-1, beta 1 subunit [Source:MGI Symbol;Acc:MGI:1096368]
Tppp	34316.8	-0.160184	0.0711659	-2.25085	0.0243947	0.689002	36219	32414.5	0.894959	Not Sig	ENSMUSG00000021573	protein_coding	nonsignificant	tubulin polymerization promoting protein [Source:MGI Symbol;Acc:MGI:1920198]
Sft2d1	780.744	0.254989	0.113303	2.25051	0.0244164	0.689115	711.385	850.103	1.195	Not Sig	ENSMUSG00000073468	protein_coding	nonsignificant	SFT2 domain containing 1 [Source:MGI Symbol;Acc:MGI:1918689]
Plxnd1	1901.49	-0.239941	0.106648	-2.24984	0.0244591	0.689437	2060.03	1742.95	0.84608	Not Sig	ENSMUSG00000030123	protein_coding	nonsignificant	plexin D1 [Source:MGI Symbol;Acc:MGI:2154244]
Ubl5	2001.16	-0.199852	0.0888391	-2.2496	0.0244742	0.689437	2139.46	1862.86	0.870718	Not Sig	ENSMUSG00000084786	protein_coding	nonsignificant	ubiquitin-like 5 [Source:MGI Symbol;Acc:MGI:1913427]
Lrriq1	523.869	0.809335	0.359828	2.24922	0.0244982	0.689437	380.597	667.141	1.75288	Not Sig	ENSMUSG00000019892	protein_coding	nonsignificant	leucine-rich repeats and IQ motif containing 1 [Source:MGI Symbol;Acc:MGI:1922228]
Habp4	8146.81	-0.145906	0.0648687	-2.24926	0.0244961	0.689437	8558.49	7735.14	0.903797	Not Sig	ENSMUSG00000021476	protein_coding	nonsignificant	hyaluronic acid binding protein 4 [Source:MGI Symbol;Acc:MGI:1891713]
Arr3	66.7551	0.750532	0.333849	2.24812	0.0245687	0.690923	49.7323	83.7778	1.68457	Not Sig	ENSMUSG00000060890	protein_coding	nonsignificant	arrestin 3, retinal [Source:MGI Symbol;Acc:MGI:2159617]
Slc39a10	11293.8	-0.170326	0.0757918	-2.24729	0.0246218	0.69192	11961.4	10626.3	0.888383	Not Sig	ENSMUSG00000025986	protein_coding	nonsignificant	solute carrier family 39 (zinc transporter), member 10 [Source:MGI Symbol;Acc:MGI:1914515]
Rasl11b	2230.79	-0.239781	0.106768	-2.24582	0.0247156	0.693743	2417.07	2044.51	0.845865	Not Sig	ENSMUSG00000049907	protein_coding	nonsignificant	RAS-like, family 11, member B [Source:MGI Symbol;Acc:MGI:1916189]
Ntm	8475.47	-0.150591	0.0670571	-2.24572	0.0247221	0.693743	8918.32	8032.63	0.900689	Not Sig	ENSMUSG00000059974	protein_coding	nonsignificant	neurotrimin [Source:MGI Symbol;Acc:MGI:2446259]
Eef1e1	1053.91	-0.232066	0.103356	-2.2453	0.0247486	0.69399	1139.57	968.259	0.84967	Not Sig	ENSMUSG00000001707	protein_coding	nonsignificant	eukaryotic translation elongation factor 1 epsilon 1 [Source:MGI Symbol;Acc:MGI:1913393]
2610012C04Rik	50.855	0.834196	0.371706	2.24424	0.024817	0.694116	36.4806	65.2295	1.78806	Not Sig	ENSMUSG00000102474	TEC	nonsignificant	RIKEN cDNA 2610012C04 gene [Source:MGI Symbol;Acc:MGI:1917549]
Sirpa	19022.2	-0.155364	0.069237	-2.24395	0.0248357	0.694116	20046.8	17997.6	0.897778	Not Sig	ENSMUSG00000037902	protein_coding	nonsignificant	signal-regulatory protein alpha [Source:MGI Symbol;Acc:MGI:108563]
Tspyl4	15770.5	-0.165954	0.0739352	-2.24459	0.0247947	0.694116	16678.7	14862.3	0.891097	Not Sig	ENSMUSG00000039485	protein_coding	nonsignificant	TSPY-like 4 [Source:MGI Symbol;Acc:MGI:106393]
Fam169a	5003.14	-0.15764	0.0702348	-2.24447	0.0248024	0.694116	5276.33	4729.95	0.896448	Not Sig	ENSMUSG00000041817	protein_coding	nonsignificant	family with sequence similarity 169, member A [Source:MGI Symbol;Acc:MGI:2444268]
Itgb2l	7.49435	2.66071	1.18578	2.24385	0.0248418	0.694116	2.01587	12.9728	6.43536	Not Sig	ENSMUSG00000000157	protein_coding	nonsignificant	integrin beta 2-like [Source:MGI Symbol;Acc:MGI:1277979]
Cd46	1305.81	0.260106	0.115935	2.24355	0.0248615	0.69417	1187.08	1424.54	1.20003	Not Sig	ENSMUSG00000016493	protein_coding	nonsignificant	CD46 antigen, complement regulatory protein [Source:MGI Symbol;Acc:MGI:1203290]
Gm37720	103.842	0.735845	0.328033	2.24321	0.0248835	0.69429	77.5604	130.124	1.67771	Not Sig	ENSMUSG00000103959	TEC	nonsignificant	predicted gene, 37720 [Source:MGI Symbol;Acc:MGI:5610948]
Dnah6	693.745	0.969536	0.432305	2.24271	0.0249155	0.694687	469.037	918.453	1.95817	Not Sig	ENSMUSG00000052861	protein_coding	nonsignificant	dynein, axonemal, heavy chain 6 [Source:MGI Symbol;Acc:MGI:107744]
Glt8d1	1652.11	0.209445	0.0934199	2.24198	0.0249627	0.695035	1532.52	1771.69	1.15606	Not Sig	ENSMUSG00000021916	protein_coding	nonsignificant	glycosyltransferase 8 domain containing 1 [Source:MGI Symbol;Acc:MGI:1923735]
Gm49265	40.5513	1.00367	0.447675	2.24197	0.0249634	0.695035	26.887	54.2157	2.01643	Not Sig	ENSMUSG00000115647	TEC	nonsignificant	predicted gene, 49265 [Source:MGI Symbol;Acc:MGI:6118742]
Gm15991	229.077	0.440171	0.196436	2.24078	0.0250401	0.696666	194.178	263.975	1.35945	Not Sig	ENSMUSG00000087266	lncRNA	nonsignificant	predicted gene 15991 [Source:MGI Symbol;Acc:MGI:3801813]
Golga7b	2773.6	-0.184202	0.0822141	-2.24051	0.0250576	0.696666	2950.07	2597.13	0.880362	Not Sig	ENSMUSG00000042532	protein_coding	nonsignificant	golgin A7B [Source:MGI Symbol;Acc:MGI:1918396]
2900027M19Rik	1634.19	0.921941	0.41167	2.23951	0.0251226	0.697977	1129.13	2139.26	1.89461	Not Sig	ENSMUSG00000109162	TEC	nonsignificant	RIKEN cDNA 2900027M19 gene [Source:MGI Symbol;Acc:MGI:1920130]
Gm24833	2.38692	4.88622	2.18225	2.23907	0.0251514	0.69828	0	4.77384	Inf	Not Sig	ENSMUSG00000080425	snRNA	nonsignificant	predicted gene, 24833 [Source:MGI Symbol;Acc:MGI:5454610]
Rufy4	6.82894	2.53623	1.13472	2.23512	0.0254095	0.698312	1.96997	11.6879	5.93306	Not Sig	ENSMUSG00000061815	protein_coding	nonsignificant	RUN and FYVE domain containing 4 [Source:MGI Symbol;Acc:MGI:3588214]
Zfp648	36.8955	-1.00282	0.448047	-2.23819	0.0252084	0.698312	49.3445	24.4465	0.495426	Not Sig	ENSMUSG00000066797	protein_coding	nonsignificant	zinc finger protein 648 [Source:MGI Symbol;Acc:MGI:2685049]
Gm38359	164.491	0.474543	0.212117	2.23717	0.0252751	0.698312	137.543	191.44	1.39186	Not Sig	ENSMUSG00000103317	TEC	nonsignificant	predicted gene, 38359 [Source:MGI Symbol;Acc:MGI:5611587]
Zcchc9-ps	127.588	0.645754	0.288782	2.23613	0.0253435	0.698312	99.1402	156.036	1.57389	Not Sig	ENSMUSG00000083274	processed_pseudogene	nonsignificant	zinc finger, CCHC domain containing 9, pseudogene [Source:MGI Symbol;Acc:MGI:3651106]
Cdk5rap2	2268.56	0.1852	0.0827808	2.23723	0.0252714	0.698312	2123.2	2413.92	1.13692	Not Sig	ENSMUSG00000039298	protein_coding	nonsignificant	CDK5 regulatory subunit associated protein 2 [Source:MGI Symbol;Acc:MGI:2384875]
Hpcal4	40365.1	-0.164666	0.0736246	-2.23657	0.0253148	0.698312	42668.3	38061.9	0.892042	Not Sig	ENSMUSG00000046093	protein_coding	nonsignificant	hippocalcin-like 4 [Source:MGI Symbol;Acc:MGI:2157521]
Igsf21	965.997	-0.265562	0.118753	-2.23626	0.025335	0.698312	1055.81	876.18	0.829863	Not Sig	ENSMUSG00000040972	protein_coding	nonsignificant	immunoglobulin superfamily, member 21 [Source:MGI Symbol;Acc:MGI:2681842]
Grm3	4907.19	-0.207876	0.0929946	-2.23536	0.0253936	0.698312	5261.69	4552.69	0.865253	Not Sig	ENSMUSG00000003974	protein_coding	nonsignificant	glutamate receptor, metabotropic 3 [Source:MGI Symbol;Acc:MGI:1351340]
Gm43290	133.19	0.530044	0.236828	2.2381	0.0252146	0.698312	108.74	157.641	1.44971	Not Sig	ENSMUSG00000104641	TEC	nonsignificant	predicted gene 43290 [Source:MGI Symbol;Acc:MGI:5663427]
Dctn1	16062.2	-0.146898	0.0656882	-2.23629	0.0253326	0.698312	16880.3	15244.1	0.903072	Not Sig	ENSMUSG00000031865	protein_coding	nonsignificant	dynactin 1 [Source:MGI Symbol;Acc:MGI:107745]
Gm32486	2.3857	-4.53134	2.02735	-2.23511	0.0254103	0.698312	4.7714	0	0	Not Sig	ENSMUSG00000110115	lncRNA	nonsignificant	predicted gene, 32486 [Source:MGI Symbol;Acc:MGI:5591645]
Svet1	310.59	0.567902	0.253864	2.23703	0.0252846	0.698312	249.794	371.386	1.48677	Not Sig	ENSMUSG00000109648	TEC	nonsignificant	subventricular expressed transcript 1 [Source:MGI Symbol;Acc:MGI:2385655]
Timp2	10898.3	-0.247112	0.110452	-2.23728	0.0252678	0.698312	11831.2	9965.5	0.842309	Not Sig	ENSMUSG00000017466	protein_coding	nonsignificant	tissue inhibitor of metalloproteinase 2 [Source:MGI Symbol;Acc:MGI:98753]
Itpr3	281.293	-0.360415	0.161263	-2.23496	0.0254201	0.698312	316.54	246.046	0.7773	Not Sig	ENSMUSG00000042644	protein_coding	nonsignificant	inositol 1,4,5-triphosphate receptor 3 [Source:MGI Symbol;Acc:MGI:96624]
Gm18150	50.1185	0.861661	0.385388	2.23583	0.025363	0.698312	35.4509	64.7861	1.82749	Not Sig	ENSMUSG00000103601	unprocessed_pseudogene	nonsignificant	predicted gene, 18150 [Source:MGI Symbol;Acc:MGI:5010335]
Syn1	24170.3	-0.163916	0.0733612	-2.23437	0.0254585	0.698877	25542.6	22798	0.892547	Not Sig	ENSMUSG00000037217	protein_coding	nonsignificant	synapsin I [Source:MGI Symbol;Acc:MGI:98460]
Fam217b	4237.38	-0.16848	0.0754448	-2.23316	0.0255385	0.700581	4485.43	3989.32	0.889395	Not Sig	ENSMUSG00000070476	protein_coding	nonsignificant	family with sequence similarity 217, member B [Source:MGI Symbol;Acc:MGI:1918782]
Gm26644	457.253	0.302937	0.135686	2.23263	0.0255734	0.701047	409.937	504.57	1.23085	Not Sig	ENSMUSG00000097683	lncRNA	nonsignificant	predicted gene, 26644 [Source:MGI Symbol;Acc:MGI:5477138]
Gm45457	604.991	0.308617	0.138253	2.23226	0.0255976	0.701219	540.099	669.883	1.2403	Not Sig	ENSMUSG00000110411	TEC	nonsignificant	predicted gene 45457 [Source:MGI Symbol;Acc:MGI:5791293]
Gm42968	558.092	0.378717	0.169697	2.23173	0.0256326	0.701469	485.006	631.179	1.30139	Not Sig	ENSMUSG00000106043	TEC	nonsignificant	predicted gene 42968 [Source:MGI Symbol;Acc:MGI:5663105]
Gm26531	62.0867	0.885407	0.396762	2.23158	0.0256425	0.701469	43.5295	80.6439	1.85263	Not Sig	ENSMUSG00000097902	lncRNA	nonsignificant	predicted gene, 26531 [Source:MGI Symbol;Acc:MGI:5477025]
Gm14445	53.1392	0.873919	0.391715	2.23101	0.0256807	0.702022	37.2595	69.0188	1.85238	Not Sig	ENSMUSG00000082112	transcribed_unprocessed_pseudogene	nonsignificant	predicted gene 14445 [Source:MGI Symbol;Acc:MGI:3652317]
Met	560.856	-0.288237	0.129264	-2.22983	0.0257585	0.703167	617.543	504.168	0.816409	Not Sig	ENSMUSG00000009376	protein_coding	nonsignificant	met proto-oncogene [Source:MGI Symbol;Acc:MGI:96969]
Krt8	34.1785	1.39821	0.627038	2.22987	0.0257563	0.703167	18.7967	49.5603	2.63664	Not Sig	ENSMUSG00000049382	protein_coding	nonsignificant	keratin 8 [Source:MGI Symbol;Acc:MGI:96705]
Gm43528	293.228	0.54152	0.24297	2.22876	0.0258302	0.704632	238.636	347.821	1.45754	Not Sig	ENSMUSG00000105290	TEC	nonsignificant	predicted gene 43528 [Source:MGI Symbol;Acc:MGI:5663665]
Rap1gap	7048.74	-0.154513	0.0693487	-2.22807	0.0258761	0.704808	7426.95	6670.54	0.898153	Not Sig	ENSMUSG00000041351	protein_coding	nonsignificant	Rap1 GTPase-activating protein [Source:MGI Symbol;Acc:MGI:109338]
Gm43000	193.53	0.642535	0.288411	2.22785	0.0258906	0.704808	150.981	236.079	1.56364	Not Sig	ENSMUSG00000104886	lncRNA	nonsignificant	predicted gene 43000 [Source:MGI Symbol;Acc:MGI:5663137]
Clip3	25404.7	-0.157719	0.0707928	-2.2279	0.0258872	0.704808	26793.4	24016	0.89634	Not Sig	ENSMUSG00000013921	protein_coding	nonsignificant	CAP-GLY domain containing linker protein 3 [Source:MGI Symbol;Acc:MGI:1923936]
9330159N22Rik	67.6461	0.872991	0.392025	2.22687	0.0259556	0.706087	47.545	87.7472	1.84556	Not Sig	ENSMUSG00000113695	TEC	nonsignificant	RIKEN cDNA 9330159N22 gene [Source:MGI Symbol;Acc:MGI:1924453]
Gm44832	168.848	0.518933	0.233113	2.2261	0.0260072	0.706997	138.956	198.74	1.43024	Not Sig	ENSMUSG00000108832	lncRNA	nonsignificant	predicted gene 44832 [Source:MGI Symbol;Acc:MGI:5753408]
Shq1	385.223	-0.314763	0.141444	-2.22536	0.0260571	0.707864	426.927	343.52	0.804633	Not Sig	ENSMUSG00000035378	protein_coding	nonsignificant	SHQ1 homolog (S. cerevisiae) [Source:MGI Symbol;Acc:MGI:1919421]
Frmd4a	7867.96	0.177854	0.0799335	2.22503	0.0260793	0.707975	7383.71	8352.21	1.13117	Not Sig	ENSMUSG00000026657	protein_coding	nonsignificant	FERM domain containing 4A [Source:MGI Symbol;Acc:MGI:1919850]
Gm37954	165.549	0.462174	0.207874	2.22333	0.0261933	0.710577	139.034	192.063	1.38141	Not Sig	ENSMUSG00000104060	TEC	nonsignificant	predicted gene, 37954 [Source:MGI Symbol;Acc:MGI:5611182]
Rgma	2034.27	-0.268086	0.120621	-2.22255	0.0262461	0.711294	2224.24	1844.3	0.829182	Not Sig	ENSMUSG00000070509	protein_coding	nonsignificant	repulsive guidance molecule family member A [Source:MGI Symbol;Acc:MGI:2679262]
Nuak1	5269.15	-0.215644	0.0970399	-2.22222	0.0262685	0.711294	5663.54	4874.76	0.860727	Not Sig	ENSMUSG00000020032	protein_coding	nonsignificant	NUAK family, SNF1-like kinase, 1 [Source:MGI Symbol;Acc:MGI:1925226]
Gm47659	161.664	0.520672	0.234312	2.22213	0.0262742	0.711294	132.285	191.042	1.44417	Not Sig	ENSMUSG00000113993	processed_pseudogene	nonsignificant	predicted gene, 47659 [Source:MGI Symbol;Acc:MGI:6096746]
Sox5	3432.3	-0.18394	0.0828234	-2.22086	0.0263602	0.713128	3651.51	3213.09	0.879934	Not Sig	ENSMUSG00000041540	protein_coding	nonsignificant	SRY (sex determining region Y)-box 5 [Source:MGI Symbol;Acc:MGI:98367]
Gm50219	15.8191	1.48204	0.667508	2.22026	0.0264009	0.713737	8.31901	23.3191	2.80312	Not Sig	ENSMUSG00000117678	processed_pseudogene	nonsignificant	predicted gene, 50219 [Source:MGI Symbol;Acc:MGI:6303014]
Etnppl	472.112	-0.474088	0.213594	-2.21957	0.0264478	0.714018	548.97	395.253	0.719989	Not Sig	ENSMUSG00000019232	protein_coding	nonsignificant	ethanolamine phosphate phospholyase [Source:MGI Symbol;Acc:MGI:1919010]
Tmem72	1237.64	2.92203	1.31635	2.2198	0.0264323	0.714018	288.567	2186.72	7.57785	Not Sig	ENSMUSG00000048108	protein_coding	nonsignificant	transmembrane protein 72 [Source:MGI Symbol;Acc:MGI:2442707]
Slc25a51	5230.49	-0.165577	0.0746094	-2.21925	0.0264701	0.714029	5531.72	4929.27	0.891092	Not Sig	ENSMUSG00000045973	protein_coding	nonsignificant	solute carrier family 25, member 51 [Source:MGI Symbol;Acc:MGI:2684984]
Gm42550	32.8651	1.03696	0.467337	2.21888	0.0264949	0.714029	21.4171	44.3131	2.06906	Not Sig	ENSMUSG00000107199	TEC	nonsignificant	predicted gene 42550 [Source:MGI Symbol;Acc:MGI:5662687]
Samd4	2023.81	-0.249326	0.112372	-2.21876	0.0265029	0.714029	2199.46	1848.15	0.840275	Not Sig	ENSMUSG00000021838	protein_coding	nonsignificant	sterile alpha motif domain containing 4 [Source:MGI Symbol;Acc:MGI:1921730]
Gm13326	18.058	1.45236	0.655025	2.21725	0.0266057	0.715057	9.68768	26.4283	2.72803	Not Sig	ENSMUSG00000082235	processed_pseudogene	nonsignificant	predicted gene 13326 [Source:MGI Symbol;Acc:MGI:3650196]
Usp46os2	30.129	1.04066	0.469307	2.21743	0.0265935	0.715057	19.5942	40.6639	2.0753	Not Sig	ENSMUSG00000086234	lncRNA	nonsignificant	ubiquitin specific peptidase 46, opposite strand 2 [Source:MGI Symbol;Acc:MGI:1924246]
Wee1	1286.74	-0.249982	0.112722	-2.21768	0.0265763	0.715057	1399.47	1174	0.838894	Not Sig	ENSMUSG00000031016	protein_coding	nonsignificant	WEE 1 homolog 1 (S. pombe) [Source:MGI Symbol;Acc:MGI:103075]
Adarb2	4073.16	0.215622	0.0972527	2.21713	0.0266142	0.715057	3767.43	4378.89	1.1623	Not Sig	ENSMUSG00000052551	protein_coding	nonsignificant	adenosine deaminase, RNA-specific, B2 [Source:MGI Symbol;Acc:MGI:2151118]
A230051N06Rik	159.578	-0.451899	0.203865	-2.21666	0.0266462	0.715427	184.331	134.824	0.731422	Not Sig	ENSMUSG00000117172	lncRNA	nonsignificant	RIKEN cDNA A230051N06 gene [Source:MGI Symbol;Acc:MGI:2444339]
Adgrl2	5348.37	-0.166495	0.0751473	-2.21558	0.0267201	0.716756	5656.48	5040.27	0.891061	Not Sig	ENSMUSG00000028184	protein_coding	nonsignificant	adhesion G protein-coupled receptor L2 [Source:MGI Symbol;Acc:MGI:2139714]
Potefam3e	4.34312	3.69959	1.66994	2.2154	0.0267323	0.716756	0.651657	8.03457	12.3294	Not Sig	ENSMUSG00000096265	protein_coding	nonsignificant	POTE ankyrin domain family member 3E [Source:MGI Symbol;Acc:MGI:1923056]
Ppm1a	14925.6	-0.140532	0.0634595	-2.21451	0.0267937	0.71791	15652.8	14198.4	0.907085	Not Sig	ENSMUSG00000021096	protein_coding	nonsignificant	protein phosphatase 1A, magnesium dependent, alpha isoform [Source:MGI Symbol;Acc:MGI:99878]
Gm42536	55.2384	0.773822	0.349768	2.21239	0.0269399	0.719929	40.594	69.8828	1.72151	Not Sig	ENSMUSG00000105502	TEC	nonsignificant	predicted gene 42536 [Source:MGI Symbol;Acc:MGI:5662673]
Tjp3	76.2864	0.897792	0.40581	2.21235	0.0269426	0.719929	53.3336	99.2391	1.86072	Not Sig	ENSMUSG00000034917	protein_coding	nonsignificant	tight junction protein 3 [Source:MGI Symbol;Acc:MGI:1351650]
Gm12027	2.31336	4.84988	2.19142	2.21312	0.0268891	0.719929	0	4.62672	Inf	Not Sig	ENSMUSG00000086911	lncRNA	nonsignificant	predicted gene 12027 [Source:MGI Symbol;Acc:MGI:3651189]
Sdha	17053.6	-0.135967	0.0614501	-2.21265	0.0269218	0.719929	17856.4	16250.9	0.91009	Not Sig	ENSMUSG00000021577	protein_coding	nonsignificant	succinate dehydrogenase complex, subunit A, flavoprotein (Fp) [Source:MGI Symbol;Acc:MGI:1914195]
Gm48267	448.026	0.457376	0.206793	2.21176	0.0269834	0.720527	376.989	519.063	1.37687	Not Sig	ENSMUSG00000114624	TEC	nonsignificant	predicted gene, 48267 [Source:MGI Symbol;Acc:MGI:6097690]
Map3k5	2888.72	-0.198034	0.0895589	-2.21121	0.0270211	0.72055	3088.27	2689.17	0.870769	Not Sig	ENSMUSG00000071369	protein_coding	nonsignificant	mitogen-activated protein kinase kinase kinase 5 [Source:MGI Symbol;Acc:MGI:1346876]
Gm35405	47.5631	0.904873	0.409187	2.21139	0.0270085	0.72055	32.8686	62.2575	1.89413	Not Sig	ENSMUSG00000112195	processed_pseudogene	nonsignificant	predicted gene, 35405 [Source:MGI Symbol;Acc:MGI:5594564]
Gm43679	520.582	0.299642	0.135547	2.21062	0.0270623	0.721158	466.412	574.752	1.23229	Not Sig	ENSMUSG00000105950	TEC	nonsignificant	predicted gene 43679 [Source:MGI Symbol;Acc:MGI:5663816]
Tac1	285.102	-0.400161	0.181161	-2.20887	0.0271837	0.722984	324.777	245.427	0.75568	Not Sig	ENSMUSG00000061762	protein_coding	nonsignificant	tachykinin 1 [Source:MGI Symbol;Acc:MGI:98474]
Gm21276	2.37676	4.86003	2.20027	2.20883	0.0271862	0.722984	0	4.75353	Inf	Not Sig	ENSMUSG00000094233	transcribed_unprocessed_pseudogene	nonsignificant	predicted gene, 21276 [Source:MGI Symbol;Acc:MGI:5434631]
Fabp7	1417.59	0.297264	0.134562	2.20912	0.0271661	0.722984	1272.86	1562.33	1.22741	Not Sig	ENSMUSG00000019874	protein_coding	nonsignificant	fatty acid binding protein 7, brain [Source:MGI Symbol;Acc:MGI:101916]
Zfp982	84.0619	-0.735378	0.333171	-2.20721	0.0272996	0.725506	104.902	63.2221	0.60268	Not Sig	ENSMUSG00000078496	protein_coding	nonsignificant	zinc finger protein 982 [Source:MGI Symbol;Acc:MGI:3701121]
Gm37524	189.561	0.577774	0.261842	2.20658	0.0273435	0.725513	152.315	226.807	1.48907	Not Sig	ENSMUSG00000103780	TEC	nonsignificant	predicted gene, 37524 [Source:MGI Symbol;Acc:MGI:5610752]
Pcyox1	6609.26	-0.167891	0.0760925	-2.20641	0.0273555	0.725513	6994.4	6224.11	0.88987	Not Sig	ENSMUSG00000029998	protein_coding	nonsignificant	prenylcysteine oxidase 1 [Source:MGI Symbol;Acc:MGI:1914131]
AU040972	148.437	0.51982	0.235542	2.20691	0.0273206	0.725513	121.689	175.184	1.4396	Not Sig	ENSMUSG00000091523	lncRNA	nonsignificant	expressed sequence AU040972 [Source:MGI Symbol;Acc:MGI:2144426]
Gm11149	239.238	0.433654	0.196647	2.20524	0.027437	0.727182	203.399	275.078	1.35241	Not Sig	ENSMUSG00000079564	lncRNA	nonsignificant	predicted gene 11149 [Source:MGI Symbol;Acc:MGI:3642683]
Inpp4a	13871.2	-0.140618	0.0638053	-2.20386	0.0275339	0.727289	14547.7	13194.7	0.906993	Not Sig	ENSMUSG00000026113	protein_coding	nonsignificant	inositol polyphosphate-4-phosphatase, type I [Source:MGI Symbol;Acc:MGI:1931123]
Gbx2	4.73916	-3.7595	1.70555	-2.20427	0.0275052	0.727289	8.93128	0.547043	0.0612503	Not Sig	ENSMUSG00000034486	protein_coding	nonsignificant	gastrulation brain homeobox 2 [Source:MGI Symbol;Acc:MGI:95668]
Gm37868	379.255	0.41064	0.186263	2.20462	0.0274805	0.727289	324.903	433.607	1.33457	Not Sig	ENSMUSG00000102179	TEC	nonsignificant	predicted gene, 37868 [Source:MGI Symbol;Acc:MGI:5611096]
Gm43048	339.689	0.478676	0.217175	2.2041	0.0275174	0.727289	283.11	396.269	1.3997	Not Sig	ENSMUSG00000105828	TEC	nonsignificant	predicted gene 43048 [Source:MGI Symbol;Acc:MGI:5663185]
Gm43166	357.307	0.415964	0.188689	2.20449	0.0274897	0.727289	305.759	408.855	1.33718	Not Sig	ENSMUSG00000106710	lncRNA	nonsignificant	predicted gene 43166 [Source:MGI Symbol;Acc:MGI:5663303]
Gm37057	6.60695	2.43757	1.10681	2.20234	0.0276415	0.728324	2.06002	11.1539	5.41444	Not Sig	ENSMUSG00000102751	TEC	nonsignificant	predicted gene, 37057 [Source:MGI Symbol;Acc:MGI:5610285]
Slc6a17	24663.5	-0.167262	0.0759491	-2.20229	0.0276446	0.728324	26092.8	23234.1	0.890442	Not Sig	ENSMUSG00000027894	protein_coding	nonsignificant	solute carrier family 6 (neurotransmitter transporter), member 17 [Source:MGI Symbol;Acc:MGI:2442535]
Gm43509	158.957	0.538782	0.244651	2.20225	0.0276479	0.728324	129.511	188.404	1.45473	Not Sig	ENSMUSG00000106603	TEC	nonsignificant	predicted gene 43509 [Source:MGI Symbol;Acc:MGI:5663646]
Rhof	1610.46	-0.222332	0.100945	-2.20251	0.0276291	0.728324	1735.12	1485.8	0.856305	Not Sig	ENSMUSG00000029449	protein_coding	nonsignificant	ras homolog family member F (in filopodia) [Source:MGI Symbol;Acc:MGI:1345629]
Ldlr	1405.78	-0.280491	0.127381	-2.20199	0.0276661	0.728324	1541.17	1270.39	0.824307	Not Sig	ENSMUSG00000032193	protein_coding	nonsignificant	low density lipoprotein receptor [Source:MGI Symbol;Acc:MGI:96765]
Gm6963	32.5369	1.04785	0.475955	2.20157	0.0276958	0.728615	21.1858	43.888	2.07158	Not Sig	ENSMUSG00000085799	processed_pseudogene	nonsignificant	predicted gene 6963 [Source:MGI Symbol;Acc:MGI:3647921]
Gm5828	15.7909	1.38464	0.630016	2.19778	0.0279647	0.729223	8.72693	22.8548	2.61888	Not Sig	ENSMUSG00000091020	processed_pseudogene	nonsignificant	predicted gene 5828 [Source:MGI Symbol;Acc:MGI:3644176]
Fam83c	14.193	-1.54577	0.703356	-2.19771	0.0279698	0.729223	21.1781	7.20791	0.340347	Not Sig	ENSMUSG00000074647	protein_coding	nonsignificant	family with sequence similarity 83, member C [Source:MGI Symbol;Acc:MGI:1918655]
Runx1t1	3693.24	-0.184861	0.0840161	-2.20031	0.0277851	0.729223	3928.79	3457.7	0.880092	Not Sig	ENSMUSG00000006586	protein_coding	nonsignificant	RUNX1 translocation partner 1 [Source:MGI Symbol;Acc:MGI:104793]
Prkag2os1	219.332	0.445335	0.202723	2.19676	0.0280373	0.729223	185.643	253.021	1.36294	Not Sig	ENSMUSG00000086446	lncRNA	nonsignificant	protein kinase, AMP-activated, gamma 2 non-catalytic subunit, opposite strand 1 [Source:MGI Symbol;Acc:MGI:1918411]
Gm6089	51.3664	0.89004	0.404396	2.20092	0.027742	0.729223	36.1458	66.5869	1.84217	Not Sig	ENSMUSG00000105422	processed_pseudogene	nonsignificant	predicted gene 6089 [Source:MGI Symbol;Acc:MGI:3647070]
Leng8	7735.53	0.176929	0.0804251	2.19992	0.0278128	0.729223	7262.28	8208.78	1.13033	Not Sig	ENSMUSG00000035545	protein_coding	nonsignificant	leukocyte receptor cluster (LRC) member 8 [Source:MGI Symbol;Acc:MGI:2142195]
Ptpn5	4337.28	-0.16955	0.0771442	-2.19784	0.0279608	0.729223	4593.45	4081.1	0.88846	Not Sig	ENSMUSG00000030854	protein_coding	nonsignificant	protein tyrosine phosphatase, non-receptor type 5 [Source:MGI Symbol;Acc:MGI:97807]
Gm47911	252.073	0.431498	0.196389	2.19716	0.0280088	0.729223	214.291	289.856	1.35263	Not Sig	ENSMUSG00000112369	TEC	nonsignificant	predicted gene, 47911 [Source:MGI Symbol;Acc:MGI:6097157]
Gm22958	50.1425	0.847139	0.385653	2.19664	0.0280465	0.729223	35.9036	64.3815	1.79318	Not Sig	ENSMUSG00000084461	snRNA	nonsignificant	predicted gene, 22958 [Source:MGI Symbol;Acc:MGI:5452735]
Rab11fip4	20293.8	-0.153576	0.0698457	-2.19879	0.0278932	0.729223	21373.8	19213.8	0.898939	Not Sig	ENSMUSG00000017639	protein_coding	nonsignificant	RAB11 family interacting protein 4 (class II) [Source:MGI Symbol;Acc:MGI:2442920]
Gm17024	155.807	0.48545	0.220853	2.19807	0.0279444	0.729223	129.858	181.756	1.39965	Not Sig	ENSMUSG00000090582	lncRNA	nonsignificant	predicted gene 17024 [Source:MGI Symbol;Acc:MGI:4937851]
Gm48181	116.324	0.564124	0.256472	2.19955	0.0278386	0.729223	93.6906	138.957	1.48314	Not Sig	ENSMUSG00000112056	TEC	nonsignificant	predicted gene, 48181 [Source:MGI Symbol;Acc:MGI:6097557]
Gm47748	18.7267	1.31867	0.600156	2.19721	0.0280052	0.729223	10.7779	26.6756	2.47503	Not Sig	ENSMUSG00000113141	processed_pseudogene	nonsignificant	predicted gene, 47748 [Source:MGI Symbol;Acc:MGI:6096892]
4930556M19Rik	30.2728	1.19609	0.544539	2.19653	0.0280542	0.729223	18.3246	42.2211	2.30407	Not Sig	ENSMUSG00000096971	lncRNA	nonsignificant	RIKEN cDNA 4930556M19 gene [Source:MGI Symbol;Acc:MGI:1922509]
Etv5	3862.65	-0.216108	0.0982008	-2.20068	0.0277589	0.729223	4153.67	3571.62	0.859871	Not Sig	ENSMUSG00000013089	protein_coding	nonsignificant	ets variant 5 [Source:MGI Symbol;Acc:MGI:1096867]
	85.2487	0.607906	0.276683	2.19712	0.0280117	0.729223	67.4588	103.039	1.52743	Not Sig	ENSMUSG00000097926		nonsignificant
E330013P04Rik	191.146	0.460272	0.209339	2.19869	0.0279	0.729223	161.036	221.255	1.37394	Not Sig	ENSMUSG00000053117	lncRNA	nonsignificant	RIKEN cDNA E330013P04 gene [Source:MGI Symbol;Acc:MGI:2147732]
Xlr4a	58.2444	2.74698	1.25044	2.19681	0.028034	0.729223	15.0615	101.427	6.73421	Not Sig	ENSMUSG00000079845	protein_coding	nonsignificant	X-linked lymphocyte-regulated 4A [Source:MGI Symbol;Acc:MGI:3574098]
Zfp109	612.137	-0.272822	0.12425	-2.19575	0.0281096	0.729694	670.294	553.979	0.826471	Not Sig	ENSMUSG00000074283	protein_coding	nonsignificant	zinc finger protein 109 [Source:MGI Symbol;Acc:MGI:1929099]
Lrrc73	917.626	-0.241655	0.110044	-2.19598	0.0280937	0.729694	994.461	840.791	0.845475	Not Sig	ENSMUSG00000071073	protein_coding	nonsignificant	leucine rich repeat containing 73 [Source:MGI Symbol;Acc:MGI:2684934]
Gm37195	244.65	0.40134	0.182853	2.19488	0.028172	0.73083	210.353	278.948	1.32609	Not Sig	ENSMUSG00000103611	TEC	nonsignificant	predicted gene, 37195 [Source:MGI Symbol;Acc:MGI:5610423]
Gm37180	849.236	0.780758	0.355944	2.19348	0.0282727	0.73247	624.709	1073.76	1.71882	Not Sig	ENSMUSG00000103377	TEC	nonsignificant	predicted gene, 37180 [Source:MGI Symbol;Acc:MGI:5610408]
Gm45828	176.601	0.475816	0.216909	2.19362	0.0282625	0.73247	147.502	205.7	1.39456	Not Sig	ENSMUSG00000108526	TEC	nonsignificant	predicted gene 45828 [Source:MGI Symbol;Acc:MGI:5804943]
Ifi209	3.86782	3.64236	1.66124	2.19255	0.0283397	0.733091	0.548046	7.1876	13.115	Not Sig	ENSMUSG00000043263	protein_coding	nonsignificant	interferon activated gene 209 [Source:MGI Symbol;Acc:MGI:2138243]
Fbxw7	15482	-0.147168	0.0671241	-2.19247	0.0283455	0.733091	16270.8	14693.1	0.903036	Not Sig	ENSMUSG00000028086	protein_coding	nonsignificant	F-box and WD-40 domain protein 7 [Source:MGI Symbol;Acc:MGI:1354695]
Plscr1l1	1.9744	4.61379	2.10448	2.19237	0.0283528	0.733091	0	3.9488	Inf	Not Sig	ENSMUSG00000074139	protein_coding	nonsignificant	phospholipid scramblase 1 like 1 [Source:MGI Symbol;Acc:MGI:1925709]
Gm38273	520.545	0.792199	0.361673	2.19037	0.0284972	0.735851	381.023	660.067	1.73236	Not Sig	ENSMUSG00000103050	TEC	nonsignificant	predicted gene, 38273 [Source:MGI Symbol;Acc:MGI:5611501]
Lncucc1	98.1609	0.697294	0.318332	2.19046	0.0284909	0.735851	74.6722	121.65	1.62912	Not Sig	ENSMUSG00000086311	lncRNA	nonsignificant	ulcerative colitis circadian clock long noncoding RNA 1 [Source:MGI Symbol;Acc:MGI:3650741]
Gm42772	1944.75	0.666745	0.30444	2.19007	0.0285189	0.735926	1502.83	2386.68	1.58813	Not Sig	ENSMUSG00000105700	TEC	nonsignificant	predicted gene 42772 [Source:MGI Symbol;Acc:MGI:5662909]
Gm7493	59.7907	0.741454	0.338745	2.18882	0.0286098	0.737785	44.6268	74.9546	1.67958	Not Sig	ENSMUSG00000066693	processed_pseudogene	nonsignificant	predicted gene 7493 [Source:MGI Symbol;Acc:MGI:3643471]
Dnah10	237.217	0.483373	0.22091	2.18809	0.0286627	0.738178	198.485	275.949	1.39027	Not Sig	ENSMUSG00000038011	protein_coding	nonsignificant	dynein, axonemal, heavy chain 10 [Source:MGI Symbol;Acc:MGI:1860299]
Gm24145	36.9981	0.929378	0.424722	2.1882	0.0286547	0.738178	25.3417	48.6546	1.91994	Not Sig	ENSMUSG00000064565	snRNA	nonsignificant	predicted gene, 24145 [Source:MGI Symbol;Acc:MGI:5453922]
Chmp4b	5554.07	-0.176272	0.0805995	-2.18701	0.0287416	0.739238	5894.21	5213.93	0.884585	Not Sig	ENSMUSG00000038467	protein_coding	nonsignificant	charged multivesicular body protein 4B [Source:MGI Symbol;Acc:MGI:1922858]
Mindy2	7027.38	-0.152497	0.0697233	-2.18717	0.0287302	0.739238	7399.22	6655.54	0.899493	Not Sig	ENSMUSG00000042444	protein_coding	nonsignificant	MINDY lysine 48 deubiquitinase 2 [Source:MGI Symbol;Acc:MGI:2443086]
Gm37331	780.756	0.379224	0.173511	2.18559	0.0288457	0.740664	678.158	883.353	1.30258	Not Sig	ENSMUSG00000103209	TEC	nonsignificant	predicted gene, 37331 [Source:MGI Symbol;Acc:MGI:5610559]
Pcnt	2737.8	-0.181071	0.0828519	-2.18548	0.0288538	0.740664	2908.58	2567.02	0.882566	Not Sig	ENSMUSG00000001151	protein_coding	nonsignificant	pericentrin (kendrin) [Source:MGI Symbol;Acc:MGI:102722]
Gm5827	7.08251	-2.39033	1.09368	-2.18558	0.0288465	0.740664	11.8545	2.31052	0.194906	Not Sig	ENSMUSG00000117785	processed_pseudogene	nonsignificant	predicted gene 5827 [Source:MGI Symbol;Acc:MGI:3647389]
Gm37060	519.494	0.393963	0.18035	2.18443	0.0289305	0.740997	448.073	590.915	1.31879	Not Sig	ENSMUSG00000103808	TEC	nonsignificant	predicted gene, 37060 [Source:MGI Symbol;Acc:MGI:5610288]
Gm43230	47.1608	0.906528	0.414911	2.18487	0.028898	0.740997	32.9756	61.3461	1.86035	Not Sig	ENSMUSG00000106753	TEC	nonsignificant	predicted gene 43230 [Source:MGI Symbol;Acc:MGI:5663367]
Asphd1	577.8	-0.310943	0.142352	-2.18433	0.0289381	0.740997	641.102	514.498	0.80252	Not Sig	ENSMUSG00000046378	protein_coding	nonsignificant	aspartate beta-hydroxylase domain containing 1 [Source:MGI Symbol;Acc:MGI:2685014]
Arhgap6	390.364	-0.421105	0.19279	-2.18427	0.0289425	0.740997	446.773	333.955	0.747483	Not Sig	ENSMUSG00000031355	protein_coding	nonsignificant	Rho GTPase activating protein 6 [Source:MGI Symbol;Acc:MGI:1196332]
Gm44011	61.234	0.711239	0.325814	2.18296	0.029039	0.74247	46.3202	76.1478	1.64394	Not Sig	ENSMUSG00000107629	processed_pseudogene	nonsignificant	predicted gene, 44011 [Source:MGI Symbol;Acc:MGI:5690403]
Or52p2	48.1655	0.873493	0.400187	2.18271	0.029057	0.74247	34.0142	62.3167	1.83208	Not Sig	ENSMUSG00000073974	protein_coding	nonsignificant	olfactory receptor family 52 subfamily P member 2 [Source:MGI Symbol;Acc:MGI:3030385]
Gm10421	112.795	0.558591	0.255916	2.18271	0.0290568	0.74247	91.3898	134.199	1.46843	Not Sig	ENSMUSG00000099907	lncRNA	nonsignificant	predicted gene 10421 [Source:MGI Symbol;Acc:MGI:3642601]
Gm37005	72.3454	0.806475	0.369565	2.18223	0.0290927	0.742474	52.3499	92.341	1.76392	Not Sig	ENSMUSG00000103884	TEC	nonsignificant	predicted gene, 37005 [Source:MGI Symbol;Acc:MGI:5610233]
Gm37971	14.0297	1.55806	0.714199	2.18155	0.0291428	0.742474	7.09779	20.9617	2.95327	Not Sig	ENSMUSG00000102379	lncRNA	nonsignificant	predicted gene, 37971 [Source:MGI Symbol;Acc:MGI:5611199]
Tnfrsf14	32.5976	1.04882	0.480639	2.18214	0.029099	0.742474	21.1195	44.0758	2.08697	Not Sig	ENSMUSG00000042333	protein_coding	nonsignificant	tumor necrosis factor receptor superfamily, member 14 (herpesvirus entry mediator) [Source:MGI Symbol;Acc:MGI:2675303]
Acvr1b	6035.88	-0.171694	0.0787071	-2.18143	0.029152	0.742474	6395.24	5676.52	0.887617	Not Sig	ENSMUSG00000000532	protein_coding	nonsignificant	activin A receptor, type 1B [Source:MGI Symbol;Acc:MGI:1338944]
Gm3227	188.154	0.505241	0.23161	2.18143	0.0291517	0.742474	155.351	220.957	1.4223	Not Sig	ENSMUSG00000114306	lncRNA	nonsignificant	predicted gene 3227 [Source:MGI Symbol;Acc:MGI:3781405]
Gm37051	597.736	0.388602	0.178263	2.17994	0.0292618	0.743462	516.816	678.655	1.31315	Not Sig	ENSMUSG00000104221	TEC	nonsignificant	predicted gene, 37051 [Source:MGI Symbol;Acc:MGI:5610279]
Evi2	93.7007	0.622722	0.285668	2.17988	0.0292667	0.743462	73.7094	113.692	1.54244	Not Sig	ENSMUSG00000070354	protein_coding	nonsignificant	ecotropic viral integration site 2 [Source:MGI Symbol;Acc:MGI:5439444]
Fgf9	1245.3	-0.234938	0.107738	-2.18064	0.0292101	0.743462	1347.4	1143.19	0.848444	Not Sig	ENSMUSG00000021974	protein_coding	nonsignificant	fibroblast growth factor 9 [Source:MGI Symbol;Acc:MGI:104723]
Prps1	3448.54	-0.190696	0.0874603	-2.18037	0.02923	0.743462	3677.18	3219.9	0.875644	Not Sig	ENSMUSG00000031432	protein_coding	nonsignificant	phosphoribosyl pyrophosphate synthetase 1 [Source:MGI Symbol;Acc:MGI:97775]
Lama5	683.785	0.347992	0.159685	2.17924	0.0293137	0.744173	600.715	766.855	1.27657	Not Sig	ENSMUSG00000015647	protein_coding	nonsignificant	laminin, alpha 5 [Source:MGI Symbol;Acc:MGI:105382]
Gm44668	240.457	0.393896	0.180785	2.17881	0.0293456	0.744436	207.294	273.621	1.31997	Not Sig	ENSMUSG00000109363	TEC	nonsignificant	predicted gene 44668 [Source:MGI Symbol;Acc:MGI:5753244]
Spatc1	2.00133	4.61419	2.11797	2.17859	0.0293621	0.744436	0	4.00266	Inf	Not Sig	ENSMUSG00000049653	protein_coding	nonsignificant	spermatogenesis and centriole associated 1 [Source:MGI Symbol;Acc:MGI:1921531]
Gm43481	866.716	0.249663	0.11465	2.17762	0.0294341	0.744813	791.158	942.275	1.19101	Not Sig	ENSMUSG00000107000	TEC	nonsignificant	predicted gene 43481 [Source:MGI Symbol;Acc:MGI:5663618]
B230206I08Rik	914.338	0.34246	0.157228	2.17811	0.0293976	0.744813	805.367	1023.31	1.27061	Not Sig	ENSMUSG00000109574	TEC	nonsignificant	RIKEN cDNA B230206I08 gene [Source:MGI Symbol;Acc:MGI:1926094]
F830212C03Rik	53.9434	0.783274	0.359673	2.17774	0.0294256	0.744813	39.7402	68.1466	1.7148	Not Sig	ENSMUSG00000103130	TEC	nonsignificant	RIKEN cDNA F830212C03 gene [Source:MGI Symbol;Acc:MGI:3641876]
Gm42919	451.636	0.483154	0.221939	2.17697	0.0294831	0.745573	375.825	527.447	1.40344	Not Sig	ENSMUSG00000106404	TEC	nonsignificant	predicted gene 42919 [Source:MGI Symbol;Acc:MGI:5663056]
Igfbp2	1095.74	0.707436	0.325373	2.17423	0.0296879	0.747372	832.27	1359.21	1.63313	Not Sig	ENSMUSG00000039323	protein_coding	nonsignificant	insulin-like growth factor binding protein 2 [Source:MGI Symbol;Acc:MGI:96437]
Ddah1	4894.25	-0.167153	0.0768495	-2.17507	0.0296249	0.747372	5177.73	4610.78	0.890503	Not Sig	ENSMUSG00000028194	protein_coding	nonsignificant	dimethylarginine dimethylaminohydrolase 1 [Source:MGI Symbol;Acc:MGI:1916469]
Penk	691.983	-0.321479	0.147807	-2.17499	0.0296311	0.747372	768.429	615.537	0.801033	Not Sig	ENSMUSG00000045573	protein_coding	nonsignificant	preproenkephalin [Source:MGI Symbol;Acc:MGI:104629]
Nudcd3	6617.93	-0.154289	0.0709616	-2.17426	0.0296856	0.747372	6971.14	6264.72	0.898665	Not Sig	ENSMUSG00000053838	protein_coding	nonsignificant	NudC domain containing 3 [Source:MGI Symbol;Acc:MGI:2144158]
C630044B11Rik	329.902	0.392436	0.180384	2.17556	0.029588	0.747372	284.69	375.114	1.31762	Not Sig	ENSMUSG00000114448	TEC	nonsignificant	RIKEN cDNA C630044B11 gene [Source:MGI Symbol;Acc:MGI:1925962]
Malat1	1.11242e+06	0.192714	0.0885959	2.1752	0.0296148	0.747372	1.03823e+06	1.18661e+06	1.14292	Not Sig	ENSMUSG00000092341	lncRNA	nonsignificant	metastasis associated lung adenocarcinoma transcript 1 (non-coding RNA) [Source:MGI Symbol;Acc:MGI:1919539]
Gm6275	5.3763	-2.92253	1.34408	-2.17438	0.029677	0.747372	9.65852	1.09409	0.113277	Not Sig	ENSMUSG00000081295	processed_pseudogene	nonsignificant	predicted gene 6275 [Source:MGI Symbol;Acc:MGI:3645368]
Ncs1	19107.7	-0.148933	0.0685352	-2.17309	0.0297733	0.747795	20094	18121.4	0.901834	Not Sig	ENSMUSG00000062661	protein_coding	nonsignificant	neuronal calcium sensor 1 [Source:MGI Symbol;Acc:MGI:109166]
Slc30a4	4476.53	-0.176858	0.0814355	-2.17176	0.029874	0.747795	4750.89	4202.18	0.884504	Not Sig	ENSMUSG00000005802	protein_coding	nonsignificant	solute carrier family 30 (zinc transporter), member 4 [Source:MGI Symbol;Acc:MGI:1345282]
1700007F19Rik	178.2	0.491766	0.226516	2.171	0.0299313	0.747795	147.505	208.895	1.41619	Not Sig	ENSMUSG00000100666	lncRNA	nonsignificant	RIKEN cDNA 1700007F19 gene [Source:MGI Symbol;Acc:MGI:1915100]
Gm43869	274.713	0.473861	0.218287	2.17082	0.0299451	0.747795	229.377	320.049	1.3953	Not Sig	ENSMUSG00000108008	TEC	nonsignificant	predicted gene, 43869 [Source:MGI Symbol;Acc:MGI:5690261]
Atp1a3	121141	-0.164405	0.0756442	-2.1734	0.0297503	0.747795	128037	114245	0.892281	Not Sig	ENSMUSG00000040907	protein_coding	nonsignificant	ATPase, Na+/K+ transporting, alpha 3 polypeptide [Source:MGI Symbol;Acc:MGI:88107]
Ndn	3873.15	-0.228845	0.105301	-2.17325	0.0297615	0.747795	4181.83	3564.47	0.852371	Not Sig	ENSMUSG00000033585	protein_coding	nonsignificant	necdin, MAGE family member [Source:MGI Symbol;Acc:MGI:97290]
Gm45201	424.419	0.395759	0.182244	2.17159	0.0298863	0.747795	365.676	483.162	1.32129	Not Sig	ENSMUSG00000109031	TEC	nonsignificant	predicted gene 45201 [Source:MGI Symbol;Acc:MGI:5753777]
Casp3	671.843	-0.27591	0.127048	-2.17169	0.029879	0.747795	735.185	608.5	0.827684	Not Sig	ENSMUSG00000031628	protein_coding	nonsignificant	caspase 3 [Source:MGI Symbol;Acc:MGI:107739]
Rpl29-ps2	17.7278	-1.40772	0.64835	-2.17123	0.0299136	0.747795	25.5486	9.90698	0.38777	Not Sig	ENSMUSG00000094772	transcribed_processed_pseudogene	nonsignificant	ribosomal protein L29, pseudogene 2 [Source:MGI Symbol;Acc:MGI:3648624]
Cab39l	2175.18	0.581573	0.267848	2.17128	0.0299098	0.747795	1742.58	2607.78	1.49651	Not Sig	ENSMUSG00000021981	protein_coding	nonsignificant	calcium binding protein 39-like [Source:MGI Symbol;Acc:MGI:1914081]
Gm15808	43.4817	0.903508	0.416227	2.17071	0.0299531	0.747795	30.0839	56.8795	1.8907	Not Sig	ENSMUSG00000083536	processed_pseudogene	nonsignificant	predicted gene 15808 [Source:MGI Symbol;Acc:MGI:3802045]
Efna5	680.705	-0.339929	0.156567	-2.17113	0.0299211	0.747795	761.4	600.011	0.788036	Not Sig	ENSMUSG00000048915	protein_coding	nonsignificant	ephrin A5 [Source:MGI Symbol;Acc:MGI:107444]
Mbnl3	11.3939	1.96438	0.90483	2.171	0.0299315	0.747795	4.65279	18.135	3.89766	Not Sig	ENSMUSG00000036109	protein_coding	nonsignificant	muscleblind like splicing factor 3 [Source:MGI Symbol;Acc:MGI:2444912]
Diras2	17070.1	-0.184424	0.0849723	-2.1704	0.0299767	0.747909	18159.5	15980.7	0.880019	Not Sig	ENSMUSG00000047842	protein_coding	nonsignificant	DIRAS family, GTP-binding RAS-like 2 [Source:MGI Symbol;Acc:MGI:1915453]
Ppp2r5d	4047.52	-0.171607	0.0790955	-2.16962	0.0300357	0.748904	4289.63	3805.41	0.88712	Not Sig	ENSMUSG00000059409	protein_coding	nonsignificant	protein phosphatase 2, regulatory subunit B', delta [Source:MGI Symbol;Acc:MGI:2388481]
Ncald	23702.3	-0.173156	0.079834	-2.16896	0.030086	0.749681	25123.2	22281.4	0.886885	Not Sig	ENSMUSG00000051359	protein_coding	nonsignificant	neurocalcin delta [Source:MGI Symbol;Acc:MGI:1196326]
Gm4796	7.52098	2.37023	1.09338	2.16781	0.0301735	0.751381	2.50302	12.5389	5.00953	Not Sig	ENSMUSG00000112341	processed_pseudogene	nonsignificant	predicted gene 4796 [Source:MGI Symbol;Acc:MGI:3645895]
Inka2	5818.6	-0.199234	0.0919491	-2.16678	0.0302514	0.752125	6218.05	5419.14	0.871518	Not Sig	ENSMUSG00000048458	protein_coding	nonsignificant	inka box actin regulator 2 [Source:MGI Symbol;Acc:MGI:1923497]
Gdpd5	938.14	-0.236595	0.109181	-2.16699	0.0302355	0.752125	1015.68	860.599	0.847312	Not Sig	ENSMUSG00000035314	protein_coding	nonsignificant	glycerophosphodiester phosphodiesterase domain containing 5 [Source:MGI Symbol;Acc:MGI:2686926]
Eif1ax	12077.5	-0.154558	0.0713346	-2.16666	0.030261	0.752125	12724.6	11430.4	0.898294	Not Sig	ENSMUSG00000067194	protein_coding	nonsignificant	eukaryotic translation initiation factor 1A, X-linked [Source:MGI Symbol;Acc:MGI:1913485]
Ak7	177.373	0.560942	0.258931	2.16637	0.0302826	0.752185	143.555	211.191	1.47115	Not Sig	ENSMUSG00000041323	protein_coding	nonsignificant	adenylate kinase 7 [Source:MGI Symbol;Acc:MGI:1926051]
Dusp3	9155.71	-0.180519	0.0833472	-2.16587	0.0303212	0.752666	9728.16	8583.27	0.882311	Not Sig	ENSMUSG00000003518	protein_coding	nonsignificant	dual specificity phosphatase 3 (vaccinia virus phosphatase VH1-related) [Source:MGI Symbol;Acc:MGI:1919599]
Gm15666	78.3316	0.708171	0.327047	2.16535	0.0303609	0.753174	59.1996	97.4635	1.64635	Not Sig	ENSMUSG00000084399	transcribed_processed_pseudogene	nonsignificant	predicted gene 15666 [Source:MGI Symbol;Acc:MGI:3783108]
Gm15881	105.044	0.618934	0.285915	2.16474	0.0304073	0.753658	82.491	127.598	1.54681	Not Sig	ENSMUSG00000085254	processed_pseudogene	nonsignificant	predicted gene 15881 [Source:MGI Symbol;Acc:MGI:3801769]
Tmem151b	6064.91	-0.177337	0.0819265	-2.16459	0.0304189	0.753658	6438.89	5690.92	0.883836	Not Sig	ENSMUSG00000096847	protein_coding	nonsignificant	transmembrane protein 151B [Source:MGI Symbol;Acc:MGI:2685169]
Glud1	14087.6	-0.14529	0.0671323	-2.16423	0.0304468	0.753871	14797.3	13377.9	0.904082	Not Sig	ENSMUSG00000021794	protein_coding	nonsignificant	glutamate dehydrogenase 1 [Source:MGI Symbol;Acc:MGI:95753]
Vxn	11843.6	-0.169642	0.0784188	-2.16329	0.030519	0.754871	12540.8	11146.4	0.888808	Not Sig	ENSMUSG00000067879	protein_coding	nonsignificant	vexin [Source:MGI Symbol;Acc:MGI:1924232]
Gm43871	128.585	0.606303	0.280296	2.16308	0.030535	0.754871	101.669	155.5	1.52947	Not Sig	ENSMUSG00000107913	TEC	nonsignificant	predicted gene, 43871 [Source:MGI Symbol;Acc:MGI:5690263]
5330431K02Rik	923.181	0.247812	0.114571	2.16295	0.030545	0.754871	843.739	1002.62	1.18831	Not Sig	ENSMUSG00000114282	TEC	nonsignificant	RIKEN cDNA 5330431K02 gene [Source:MGI Symbol;Acc:MGI:1915439]
Gm13188	59.0899	0.809759	0.374531	2.16206	0.0306134	0.755384	42.9985	75.1814	1.74847	Not Sig	ENSMUSG00000081889	processed_pseudogene	nonsignificant	predicted gene 13188 [Source:MGI Symbol;Acc:MGI:3650857]
Spryd7	3308.78	-0.179642	0.0830846	-2.16215	0.0306063	0.755384	3516.09	3101.47	0.88208	Not Sig	ENSMUSG00000021930	protein_coding	nonsignificant	SPRY domain containing 7 [Source:MGI Symbol;Acc:MGI:1913924]
Hmgb3	564.462	-0.274271	0.126864	-2.16193	0.0306237	0.755384	617.276	511.649	0.828881	Not Sig	ENSMUSG00000015217	protein_coding	nonsignificant	high mobility group box 3 [Source:MGI Symbol;Acc:MGI:1098219]
D730003K21Rik	2.30178	4.81319	2.22756	2.16074	0.0307153	0.757166	0	4.60357	Inf	Not Sig	ENSMUSG00000110752	lncRNA	nonsignificant	RIKEN cDNA D730003K21 gene [Source:MGI Symbol;Acc:MGI:1925830]
Rab7	10463.5	-0.155373	0.0719335	-2.15996	0.0307759	0.758185	11027.3	9899.75	0.897751	Not Sig	ENSMUSG00000079477	protein_coding	nonsignificant	RAB7, member RAS oncogene family [Source:MGI Symbol;Acc:MGI:105068]
Abca12	68.4254	-0.735515	0.340796	-2.15823	0.0309101	0.760025	85.9649	50.8859	0.591939	Not Sig	ENSMUSG00000050296	protein_coding	nonsignificant	ATP-binding cassette, sub-family A member 12 [Source:MGI Symbol;Acc:MGI:2676312]
Mef2d	11526.8	-0.163243	0.0756496	-2.15788	0.0309369	0.760025	12179.6	10874	0.892808	Not Sig	ENSMUSG00000001419	protein_coding	nonsignificant	myocyte enhancer factor 2D [Source:MGI Symbol;Acc:MGI:99533]
Gm43662	471.554	0.350349	0.16237	2.15772	0.0309494	0.760025	413.879	529.229	1.2787	Not Sig	ENSMUSG00000105571	TEC	nonsignificant	predicted gene 43662 [Source:MGI Symbol;Acc:MGI:5663799]
Gm47732	3.93042	3.65964	1.69624	2.15749	0.0309671	0.760025	0.548046	7.31279	13.3434	Not Sig	ENSMUSG00000114573	lncRNA	nonsignificant	predicted gene, 47732 [Source:MGI Symbol;Acc:MGI:6096868]
Tep1	376.437	0.354637	0.164332	2.15805	0.0309236	0.760025	330.473	422.402	1.27818	Not Sig	ENSMUSG00000006281	protein_coding	nonsignificant	telomerase associated protein 1 [Source:MGI Symbol;Acc:MGI:109573]
Gm24867	11.1283	1.66608	0.772013	2.1581	0.0309198	0.760025	5.37746	16.8791	3.13887	Not Sig	ENSMUSG00000077349	snRNA	nonsignificant	predicted gene, 24867 [Source:MGI Symbol;Acc:MGI:5454644]
Gm45791	15.9757	1.43066	0.663339	2.15676	0.0310243	0.76095	8.59303	23.3584	2.71829	Not Sig	ENSMUSG00000110563	processed_pseudogene	nonsignificant	predicted gene 45791 [Source:MGI Symbol;Acc:MGI:5804906]
Gm15651	245.187	0.460986	0.213765	2.15651	0.0310438	0.760952	205.767	284.607	1.38315	Not Sig	ENSMUSG00000089663	lncRNA	nonsignificant	predicted gene 15651 [Source:MGI Symbol;Acc:MGI:3783095]
Gm43803	24.3673	1.19635	0.554969	2.1557	0.0311069	0.762021	14.9021	33.8325	2.27032	Not Sig	ENSMUSG00000104968	lncRNA	nonsignificant	predicted gene 43803 [Source:MGI Symbol;Acc:MGI:5663940]
Gm38024	154.124	0.530802	0.246375	2.15444	0.0312055	0.762478	125.704	182.544	1.45217	Not Sig	ENSMUSG00000102647	TEC	nonsignificant	predicted gene, 38024 [Source:MGI Symbol;Acc:MGI:5611252]
Gm13416	145.587	0.47713	0.221449	2.15458	0.0311948	0.762478	121.544	169.629	1.39561	Not Sig	ENSMUSG00000084241	processed_pseudogene	nonsignificant	predicted gene 13416 [Source:MGI Symbol;Acc:MGI:3652158]
Dnaaf3	33.2072	0.977325	0.453802	2.15364	0.0312686	0.762478	22.2235	44.1908	1.98847	Not Sig	ENSMUSG00000055809	protein_coding	nonsignificant	dynein, axonemal assembly factor 3 [Source:MGI Symbol;Acc:MGI:3588207]
Gm35040	2095.81	-0.204337	0.0948148	-2.15512	0.0311524	0.762478	2243.6	1948.01	0.868255	Not Sig	ENSMUSG00000108616	lncRNA	nonsignificant	predicted gene, 35040 [Source:MGI Symbol;Acc:MGI:5594199]
Gm45130	768.069	0.287895	0.133704	2.15323	0.0313008	0.762478	691.471	844.667	1.22155	Not Sig	ENSMUSG00000109481	TEC	nonsignificant	predicted gene 45130 [Source:MGI Symbol;Acc:MGI:5753706]
Gm47621	113.946	0.642743	0.298439	2.15368	0.0312652	0.762478	88.6129	139.28	1.57178	Not Sig	ENSMUSG00000112576	TEC	nonsignificant	predicted gene, 47621 [Source:MGI Symbol;Acc:MGI:6096684]
Gm47602	126.458	0.497592	0.231061	2.15351	0.0312787	0.762478	104.803	148.114	1.41325	Not Sig	ENSMUSG00000113472	TEC	nonsignificant	predicted gene, 47602 [Source:MGI Symbol;Acc:MGI:6096656]
Dnase1l2	167.916	0.526591	0.244542	2.15338	0.0312888	0.762478	138.098	197.734	1.43184	Not Sig	ENSMUSG00000024136	protein_coding	nonsignificant	deoxyribonuclease 1-like 2 [Source:MGI Symbol;Acc:MGI:1913955]
Foxp4	1620.92	-0.227379	0.105546	-2.1543	0.0312167	0.762478	1748.47	1493.37	0.854099	Not Sig	ENSMUSG00000023991	protein_coding	nonsignificant	forkhead box P4 [Source:MGI Symbol;Acc:MGI:1921373]
B230303A05Rik	1007.75	0.240921	0.111936	2.15231	0.0313732	0.763767	922.711	1092.78	1.18432	Not Sig	ENSMUSG00000113701	transcribed_processed_pseudogene	nonsignificant	RIKEN cDNA B230303A05 gene [Source:MGI Symbol;Acc:MGI:3646895]
Gm38297	60.4852	0.709159	0.329535	2.152	0.0313977	0.763887	45.9196	75.0507	1.63439	Not Sig	ENSMUSG00000104272	TEC	nonsignificant	predicted gene, 38297 [Source:MGI Symbol;Acc:MGI:5611525]
Gm13330	6.14445	2.31139	1.07508	2.14997	0.0315577	0.764749	2.03707	10.2518	5.03263	Not Sig	ENSMUSG00000085319	lncRNA	nonsignificant	predicted gene 13330 [Source:MGI Symbol;Acc:MGI:3649452]
Cerkl	189.13	0.424581	0.197372	2.15116	0.0314632	0.764749	161.315	216.945	1.34485	Not Sig	ENSMUSG00000075256	protein_coding	nonsignificant	ceramide kinase-like [Source:MGI Symbol;Acc:MGI:3037816]
Gm13736	395.102	-0.379739	0.176547	-2.15092	0.0314823	0.764749	445.697	344.507	0.772963	Not Sig	ENSMUSG00000082908	transcribed_processed_pseudogene	nonsignificant	predicted gene 13736 [Source:MGI Symbol;Acc:MGI:3650137]
	60.4257	0.798649	0.371369	2.15055	0.0315114	0.764749	43.9122	76.9392	1.75211	Not Sig	ENSMUSG00000075014		nonsignificant
Gm19445	726.681	0.82515	0.383748	2.15024	0.0315366	0.764749	524.313	929.049	1.77194	Not Sig	ENSMUSG00000102498	TEC	nonsignificant	predicted gene, 19445 [Source:MGI Symbol;Acc:MGI:5011630]
Purb	56465.5	-0.14553	0.0676863	-2.15006	0.0315502	0.764749	59310.5	53620.4	0.904062	Not Sig	ENSMUSG00000094483	protein_coding	nonsignificant	purine rich element binding protein B [Source:MGI Symbol;Acc:MGI:1338779]
Ubxn2a	3845.47	-0.151756	0.0705903	-2.14981	0.0315699	0.764749	4047.92	3643.02	0.899972	Not Sig	ENSMUSG00000020634	protein_coding	nonsignificant	UBX domain protein 2A [Source:MGI Symbol;Acc:MGI:2442310]
Gm13185	15.5505	1.52834	0.711165	2.14906	0.0316297	0.765725	7.95811	23.1429	2.90809	Not Sig	ENSMUSG00000085205	lncRNA	nonsignificant	predicted gene 13185 [Source:MGI Symbol;Acc:MGI:3651411]
Rps5	2898.57	-0.214575	0.0998666	-2.14862	0.0316648	0.766101	3115.63	2681.5	0.860661	Not Sig	ENSMUSG00000012848	protein_coding	nonsignificant	ribosomal protein S5 [Source:MGI Symbol;Acc:MGI:1097682]
Gm38116	233.709	0.503641	0.234601	2.1468	0.0318096	0.766983	192.805	274.614	1.42431	Not Sig	ENSMUSG00000102937	TEC	nonsignificant	predicted gene, 38116 [Source:MGI Symbol;Acc:MGI:5611344]
Gm37121	175.521	0.448269	0.208862	2.14624	0.0318536	0.766983	148.134	202.907	1.36975	Not Sig	ENSMUSG00000103032	TEC	nonsignificant	predicted gene, 37121 [Source:MGI Symbol;Acc:MGI:5610349]
Tuba4a	11808.2	-0.175087	0.0815923	-2.14588	0.0318826	0.766983	12524.1	11092.2	0.885669	Not Sig	ENSMUSG00000026202	protein_coding	nonsignificant	tubulin, alpha 4A [Source:MGI Symbol;Acc:MGI:1095410]
Eif5a2	3936.37	-0.170977	0.0796374	-2.14694	0.031798	0.766983	4170.57	3702.17	0.887688	Not Sig	ENSMUSG00000050192	protein_coding	nonsignificant	eukaryotic translation initiation factor 5A2 [Source:MGI Symbol;Acc:MGI:1933735]
Prss12	983.428	-0.284037	0.132382	-2.14558	0.0319064	0.766983	1080.7	886.159	0.819988	Not Sig	ENSMUSG00000027978	protein_coding	nonsignificant	serine protease 12 neurotrypsin (motopsin) [Source:MGI Symbol;Acc:MGI:1100881]
Gm44080	21.4342	1.18302	0.551172	2.14638	0.0318429	0.766983	13.0675	29.801	2.28055	Not Sig	ENSMUSG00000108004	TEC	nonsignificant	predicted gene, 44080 [Source:MGI Symbol;Acc:MGI:5690472]
C1s1	31.9096	1.00218	0.467119	2.14545	0.0319168	0.766983	21.216	42.6031	2.00806	Not Sig	ENSMUSG00000038521	protein_coding	nonsignificant	complement component 1, s subcomponent 1 [Source:MGI Symbol;Acc:MGI:1355312]
Gm47896	1.97298	4.59959	2.14183	2.1475	0.0317532	0.766983	0	3.94596	Inf	Not Sig	ENSMUSG00000112425	lncRNA	nonsignificant	predicted gene, 47896 [Source:MGI Symbol;Acc:MGI:6097130]
Gm22513	1873.64	-2.28053	1.0629	-2.14557	0.0319074	0.766983	3107.61	639.684	0.205845	Not Sig	ENSMUSG00000119895	snRNA	nonsignificant	predicted gene, 22513 [Source:MGI Symbol;Acc:MGI:5452290]
Gm30251	112.154	0.635729	0.296126	2.14682	0.0318078	0.766983	87.3948	136.914	1.56661	Not Sig	ENSMUSG00000116847	processed_pseudogene	nonsignificant	predicted gene, 30251 [Source:MGI Symbol;Acc:MGI:5589410]
Gm14542	1.97298	4.59959	2.14183	2.1475	0.0317532	0.766983	0	3.94596	Inf	Not Sig	ENSMUSG00000081220	processed_pseudogene	nonsignificant	predicted gene 14542 [Source:MGI Symbol;Acc:MGI:3705745]
Lsm12	3018.47	-0.167008	0.0778545	-2.14513	0.0319422	0.767121	3194.14	2842.81	0.890007	Not Sig	ENSMUSG00000020922	protein_coding	nonsignificant	LSM12 homolog [Source:MGI Symbol;Acc:MGI:1919592]
Slc27a4	3301.04	-0.17844	0.0832142	-2.14434	0.0320054	0.767228	3505.76	3096.32	0.883211	Not Sig	ENSMUSG00000059316	protein_coding	nonsignificant	solute carrier family 27 (fatty acid transporter), member 4 [Source:MGI Symbol;Acc:MGI:1347347]
Gm23058	18.1714	1.31139	0.611456	2.1447	0.0319767	0.767228	10.4367	25.906	2.48219	Not Sig	ENSMUSG00000070214	snRNA	nonsignificant	predicted gene, 23058 [Source:MGI Symbol;Acc:MGI:5452835]
Ccbe1	2135.03	0.215251	0.100377	2.14442	0.0319989	0.767228	1976.27	2293.78	1.16066	Not Sig	ENSMUSG00000046318	protein_coding	nonsignificant	collagen and calcium binding EGF domains 1 [Source:MGI Symbol;Acc:MGI:2445053]
Kif9	402.192	0.383568	0.178962	2.1433	0.0320894	0.768301	348.668	455.716	1.30702	Not Sig	ENSMUSG00000032489	protein_coding	nonsignificant	kinesin family member 9 [Source:MGI Symbol;Acc:MGI:1098237]
Gm49878	36.7015	0.97888	0.456691	2.14342	0.0320795	0.768301	24.562	48.8409	1.98847	Not Sig	ENSMUSG00000117118	lncRNA	nonsignificant	predicted gene, 49878 [Source:MGI Symbol;Acc:MGI:6270558]
Rps15	6962.54	-0.17578	0.0820475	-2.14242	0.0321597	0.769043	7388.38	6536.7	0.884728	Not Sig	ENSMUSG00000063457	protein_coding	nonsignificant	ribosomal protein S15 [Source:MGI Symbol;Acc:MGI:98117]
Stk10	587.851	0.312481	0.145839	2.14264	0.0321421	0.769043	523.89	651.811	1.24418	Not Sig	ENSMUSG00000020272	protein_coding	nonsignificant	serine/threonine kinase 10 [Source:MGI Symbol;Acc:MGI:1099439]
Gpld1	1322.28	-0.212068	0.0990181	-2.14171	0.032217	0.769499	1419.14	1225.41	0.863487	Not Sig	ENSMUSG00000021340	protein_coding	nonsignificant	glycosylphosphatidylinositol specific phospholipase D1 [Source:MGI Symbol;Acc:MGI:106604]
Gm3943	12.8571	1.4962	0.698604	2.14169	0.0322181	0.769499	6.73402	18.9802	2.81855	Not Sig	ENSMUSG00000081414	processed_pseudogene	nonsignificant	predicted gene 3943 [Source:MGI Symbol;Acc:MGI:3782117]
Gm10728	19.7097	1.38344	0.646165	2.141	0.0322742	0.769595	10.9103	28.509	2.61303	Not Sig	ENSMUSG00000103701	TEC	nonsignificant	predicted gene 10728 [Source:MGI Symbol;Acc:MGI:3708672]
E030018B13Rik	153.112	0.480055	0.224229	2.14091	0.0322811	0.769595	127.379	178.846	1.40405	Not Sig	ENSMUSG00000095061	protein_coding	nonsignificant	RIKEN cDNA E030018B13 gene [Source:MGI Symbol;Acc:MGI:2686543]
Nrcam	42694.8	-0.137787	0.0643467	-2.14131	0.0322487	0.769595	44731.6	40658	0.908931	Not Sig	ENSMUSG00000020598	protein_coding	nonsignificant	neuronal cell adhesion molecule [Source:MGI Symbol;Acc:MGI:104750]
Gm21816	233.423	0.506658	0.236704	2.14047	0.0323165	0.769969	192.38	274.467	1.4267	Not Sig	ENSMUSG00000096870	lncRNA	nonsignificant	predicted gene, 21816 [Source:MGI Symbol;Acc:MGI:5433980]
6720464F23Rik	199.389	0.560521	0.261937	2.13991	0.0323621	0.770587	160.654	238.125	1.48222	Not Sig	ENSMUSG00000103432	TEC	nonsignificant	RIKEN cDNA 6720464F23 gene [Source:MGI Symbol;Acc:MGI:2444677]
H4c3	1400.48	-0.273998	0.128067	-2.13949	0.0323963	0.770933	1534.48	1266.48	0.825354	Not Sig	ENSMUSG00000060678	protein_coding	nonsignificant	H4 clustered histone 3 [Source:MGI Symbol;Acc:MGI:2448421]
Pla2g2f	83.0607	-0.618695	0.289342	-2.13828	0.032494	0.772789	100.375	65.7461	0.655002	Not Sig	ENSMUSG00000028749	protein_coding	nonsignificant	phospholipase A2, group IIF [Source:MGI Symbol;Acc:MGI:1349661]
Prcc	1720.55	-0.204099	0.0954795	-2.13762	0.0325475	0.77359	1842.95	1598.16	0.867174	Not Sig	ENSMUSG00000004895	protein_coding	nonsignificant	papillary renal cell carcinoma (translocation-associated) [Source:MGI Symbol;Acc:MGI:2137738]
	234.15	0.534765	0.250243	2.13699	0.0325991	0.774347	191.714	276.586	1.44271	Not Sig	ENSMUSG00000115569		nonsignificant
Gm43696	654.591	0.280811	0.131496	2.13552	0.0327186	0.775395	590.111	719.072	1.21854	Not Sig	ENSMUSG00000105304	lncRNA	nonsignificant	predicted gene 43696 [Source:MGI Symbol;Acc:MGI:5663833]
Lrrc8b	9997.74	-0.159983	0.0749162	-2.1355	0.0327203	0.775395	10551	9444.52	0.895133	Not Sig	ENSMUSG00000070639	protein_coding	nonsignificant	leucine rich repeat containing 8 family, member B [Source:MGI Symbol;Acc:MGI:2141353]
Sf3b5	420.687	-0.314418	0.147236	-2.13547	0.0327224	0.775395	467.186	374.188	0.800939	Not Sig	ENSMUSG00000078348	protein_coding	nonsignificant	splicing factor 3b, subunit 5 [Source:MGI Symbol;Acc:MGI:1913375]
Lrrtm3	1591.35	-0.217986	0.102059	-2.13589	0.0326881	0.775395	1712.92	1469.79	0.858058	Not Sig	ENSMUSG00000042846	protein_coding	nonsignificant	leucine rich repeat transmembrane neuronal 3 [Source:MGI Symbol;Acc:MGI:2389177]
4933408N05Rik	14.2042	1.64844	0.772254	2.13459	0.0327949	0.776642	6.85118	21.5573	3.14651	Not Sig	ENSMUSG00000084848	lncRNA	nonsignificant	RIKEN cDNA 4933408N05 gene [Source:MGI Symbol;Acc:MGI:1918372]
Gm13619	189.434	0.430712	0.201938	2.1329	0.0329331	0.777968	161.089	217.779	1.35192	Not Sig	ENSMUSG00000052865	lncRNA	nonsignificant	predicted gene 13619 [Source:MGI Symbol;Acc:MGI:3702958]
Atcay	8001.63	-0.159627	0.0748305	-2.13318	0.0329097	0.777968	8444.79	7558.47	0.895045	Not Sig	ENSMUSG00000034958	protein_coding	nonsignificant	ataxia, cerebellar, Cayman type [Source:MGI Symbol;Acc:MGI:2448730]
4833412C15Rik	455.583	0.29659	0.139069	2.13269	0.0329502	0.777968	409.072	502.094	1.2274	Not Sig	ENSMUSG00000116298	TEC	nonsignificant	RIKEN cDNA 4833412C15 gene [Source:MGI Symbol;Acc:MGI:1921863]
Cetn2	1441.34	-0.198265	0.0929327	-2.13342	0.03289	0.777968	1540.59	1342.1	0.871162	Not Sig	ENSMUSG00000031347	protein_coding	nonsignificant	centrin 2 [Source:MGI Symbol;Acc:MGI:1347085]
Flna	6112.91	0.179349	0.0840906	2.13281	0.0329407	0.777968	5732.11	6493.7	1.13287	Not Sig	ENSMUSG00000031328	protein_coding	nonsignificant	filamin, alpha [Source:MGI Symbol;Acc:MGI:95556]
Stoml2	1516.8	-0.199024	0.0933499	-2.13202	0.033005	0.778733	1621.85	1411.75	0.870451	Not Sig	ENSMUSG00000028455	protein_coding	nonsignificant	stomatin (Epb7.2)-like 2 [Source:MGI Symbol;Acc:MGI:1913842]
Parp8	3199.55	0.176027	0.0825716	2.13181	0.0330224	0.778733	3004.96	3394.13	1.12951	Not Sig	ENSMUSG00000021725	protein_coding	nonsignificant	poly (ADP-ribose) polymerase family, member 8 [Source:MGI Symbol;Acc:MGI:1098713]
Khdc1c	10.0156	1.8927	0.88852	2.13017	0.0331572	0.778882	4.31022	15.721	3.64739	Not Sig	ENSMUSG00000041722	protein_coding	nonsignificant	KH domain containing 1C [Source:MGI Symbol;Acc:MGI:3583007]
Gm36975	107.782	0.613372	0.288034	2.12951	0.0332117	0.778882	84.8836	130.681	1.53953	Not Sig	ENSMUSG00000104302	lncRNA	nonsignificant	predicted gene, 36975 [Source:MGI Symbol;Acc:MGI:5610203]
Gm15535	90.0987	-0.668307	0.313667	-2.13063	0.03312	0.778882	110.316	69.8812	0.633462	Not Sig	ENSMUSG00000085527	lncRNA	nonsignificant	predicted gene 15535 [Source:MGI Symbol;Acc:MGI:3782983]
Gm43843	1867.43	0.23716	0.111287	2.13106	0.033084	0.778882	1712.79	2022.06	1.18057	Not Sig	ENSMUSG00000106944	TEC	nonsignificant	predicted gene 43843 [Source:MGI Symbol;Acc:MGI:5663980]
Ccdc136	2329.27	-0.186677	0.0876659	-2.12941	0.0332202	0.778882	2479.22	2179.32	0.879035	Not Sig	ENSMUSG00000029769	protein_coding	nonsignificant	coiled-coil domain containing 136 [Source:MGI Symbol;Acc:MGI:1918128]
Necap1	8816.43	-0.141517	0.0664343	-2.13017	0.0331574	0.778882	9249.1	8383.75	0.90644	Not Sig	ENSMUSG00000030327	protein_coding	nonsignificant	NECAP endocytosis associated 1 [Source:MGI Symbol;Acc:MGI:1914852]
Vmn1r90	19.3274	1.23382	0.579442	2.12932	0.0332277	0.778882	11.5193	27.1354	2.35566	Not Sig	ENSMUSG00000100586	protein_coding	nonsignificant	vomeronasal 1 receptor 90 [Source:MGI Symbol;Acc:MGI:3612342]
Or12j5	37.5896	0.914692	0.429274	2.13079	0.0331067	0.778882	25.8974	49.2819	1.90297	Not Sig	ENSMUSG00000052508	protein_coding	nonsignificant	olfactory receptor family 12 subfamily J member 5 [Source:MGI Symbol;Acc:MGI:3030370]
Slc25a11	2987.85	-0.188283	0.0884209	-2.12939	0.0332218	0.778882	3183.47	2792.22	0.877101	Not Sig	ENSMUSG00000014606	protein_coding	nonsignificant	solute carrier family 25 (mitochondrial carrier oxoglutarate carrier), member 11 [Source:MGI Symbol;Acc:MGI:1915113]
Crhr1	345.783	-0.321691	0.150967	-2.13087	0.0330998	0.778882	384.606	306.96	0.798116	Not Sig	ENSMUSG00000018634	protein_coding	nonsignificant	corticotropin releasing hormone receptor 1 [Source:MGI Symbol;Acc:MGI:88498]
Dner	7886.37	-0.148671	0.0698501	-2.12842	0.033302	0.780155	8292.54	7480.19	0.902038	Not Sig	ENSMUSG00000036766	protein_coding	nonsignificant	delta/notch-like EGF repeat containing [Source:MGI Symbol;Acc:MGI:2152889]
Adck5	439.885	0.323092	0.151848	2.12773	0.0333598	0.781042	391	488.769	1.25005	Not Sig	ENSMUSG00000022550	protein_coding	nonsignificant	aarF domain containing kinase 5 [Source:MGI Symbol;Acc:MGI:2679274]
4930433J02Rik	2.6576	5.03244	2.36682	2.12625	0.0334824	0.781504	0	5.3152	Inf	Not Sig	ENSMUSG00000103478	lncRNA	nonsignificant	RIKEN cDNA 4930433J02 gene [Source:MGI Symbol;Acc:MGI:1921914]
Gm7733	1.90165	4.54836	2.13857	2.12682	0.0334349	0.781504	0	3.80331	Inf	Not Sig	ENSMUSG00000106496	processed_pseudogene	nonsignificant	predicted gene 7733 [Source:MGI Symbol;Acc:MGI:3643628]
Afp	2.18249	4.75815	2.23747	2.12658	0.0334551	0.781504	0	4.36498	Inf	Not Sig	ENSMUSG00000054932	protein_coding	nonsignificant	alpha fetoprotein [Source:MGI Symbol;Acc:MGI:87951]
Gm45407	79.2165	0.791274	0.37216	2.12616	0.0334895	0.781504	57.7588	100.674	1.74301	Not Sig	ENSMUSG00000109873	TEC	nonsignificant	predicted gene 45407 [Source:MGI Symbol;Acc:MGI:5791243]
Ndrg4	57103.8	-0.165286	0.0777423	-2.12607	0.033497	0.781504	60373.2	53834.3	0.891693	Not Sig	ENSMUSG00000036564	protein_coding	nonsignificant	N-myc downstream regulated gene 4 [Source:MGI Symbol;Acc:MGI:2384590]
Gm48998	257.971	0.435119	0.204661	2.12605	0.0334993	0.781504	218.895	297.046	1.35703	Not Sig	ENSMUSG00000115087	TEC	nonsignificant	predicted gene, 48998 [Source:MGI Symbol;Acc:MGI:6118348]
Gm13556	146.234	0.538369	0.253282	2.12557	0.0335392	0.781855	118.823	173.646	1.46138	Not Sig	ENSMUSG00000087294	lncRNA	nonsignificant	predicted gene 13556 [Source:MGI Symbol;Acc:MGI:3651929]
Gm8832	18.0141	1.28684	0.605459	2.12539	0.0335543	0.781855	10.4076	25.6207	2.46174	Not Sig	ENSMUSG00000083611	processed_pseudogene	nonsignificant	predicted gene 8832 [Source:MGI Symbol;Acc:MGI:3646854]
Gm42878	249.287	0.370176	0.174339	2.12331	0.0337276	0.782897	217.851	280.722	1.2886	Not Sig	ENSMUSG00000105340	protein_coding	nonsignificant	predicted gene 42878 [Source:MGI Symbol;Acc:MGI:5663015]
Daglb	1654.33	-0.224075	0.105517	-2.12358	0.0337051	0.782897	1781.89	1526.78	0.856833	Not Sig	ENSMUSG00000039206	protein_coding	nonsignificant	diacylglycerol lipase, beta [Source:MGI Symbol;Acc:MGI:2442032]
Gm43884	169.9	0.590451	0.278037	2.12365	0.0336998	0.782897	135.165	204.634	1.51395	Not Sig	ENSMUSG00000108123	TEC	nonsignificant	predicted gene, 43884 [Source:MGI Symbol;Acc:MGI:5690276]
Gm44831	1092.31	0.690523	0.325259	2.12299	0.0337544	0.782897	835.625	1349	1.61436	Not Sig	ENSMUSG00000109575	TEC	nonsignificant	predicted gene 44831 [Source:MGI Symbol;Acc:MGI:5753407]
Brsk2	8035.05	-0.161393	0.0760282	-2.1228	0.0337702	0.782897	8484.92	7585.17	0.893958	Not Sig	ENSMUSG00000053046	protein_coding	nonsignificant	BR serine/threonine kinase 2 [Source:MGI Symbol;Acc:MGI:1923020]
Dlc1	4846.23	-0.159482	0.0751395	-2.12248	0.0337973	0.782897	5115.14	4577.32	0.894859	Not Sig	ENSMUSG00000031523	protein_coding	nonsignificant	deleted in liver cancer 1 [Source:MGI Symbol;Acc:MGI:1354949]
C230053D17Rik	91.1238	0.585247	0.27547	2.12454	0.0336249	0.782897	72.7006	109.547	1.50683	Not Sig	ENSMUSG00000110751	TEC	nonsignificant	RIKEN cDNA C230053D17 gene [Source:MGI Symbol;Acc:MGI:2441895]
Ckb	14177	-0.141429	0.0665945	-2.12373	0.0336926	0.782897	14872.2	13481.8	0.906508	Not Sig	ENSMUSG00000001270	protein_coding	nonsignificant	creatine kinase, brain [Source:MGI Symbol;Acc:MGI:88407]
Capsl	123.205	0.517879	0.244063	2.1219	0.0338458	0.782897	101.398	145.013	1.43014	Not Sig	ENSMUSG00000039676	protein_coding	nonsignificant	calcyphosine-like [Source:MGI Symbol;Acc:MGI:1922818]
Spag6l	557.168	0.304312	0.143308	2.12348	0.0337137	0.782897	498.057	616.279	1.23737	Not Sig	ENSMUSG00000022783	protein_coding	nonsignificant	sperm associated antigen 6-like [Source:MGI Symbol;Acc:MGI:1354388]
Pcdhgb8	427.164	0.372192	0.175418	2.12175	0.033859	0.782897	371.917	482.41	1.29709	Not Sig	ENSMUSG00000103081	protein_coding	nonsignificant	protocadherin gamma subfamily B, 8 [Source:MGI Symbol;Acc:MGI:1935200]
Ina	9386.47	-0.176903	0.0833589	-2.12219	0.0338219	0.782897	9963.17	8809.77	0.884234	Not Sig	ENSMUSG00000034336	protein_coding	nonsignificant	internexin neuronal intermediate filament protein, alpha [Source:MGI Symbol;Acc:MGI:96568]
Satl1	19.7257	-1.24269	0.585517	-2.12238	0.0338058	0.782897	27.618	11.8334	0.428467	Not Sig	ENSMUSG00000025527	protein_coding	nonsignificant	spermidine/spermine N1-acetyl transferase-like 1 [Source:MGI Symbol;Acc:MGI:1921059]
Ing4	235.776	0.36702	0.173037	2.12105	0.0339172	0.783318	206.052	265.499	1.28851	Not Sig	ENSMUSG00000030330	protein_coding	nonsignificant	inhibitor of growth family, member 4 [Source:MGI Symbol;Acc:MGI:107307]
Gm26766	90.1358	0.575376	0.271253	2.12118	0.0339064	0.783318	72.436	107.836	1.4887	Not Sig	ENSMUSG00000097259	lncRNA	nonsignificant	predicted gene, 26766 [Source:MGI Symbol;Acc:MGI:5477260]
Ptpn18	40.2501	0.943747	0.445154	2.12005	0.0340021	0.783346	27.3058	53.1945	1.94811	Not Sig	ENSMUSG00000026126	protein_coding	nonsignificant	protein tyrosine phosphatase, non-receptor type 18 [Source:MGI Symbol;Acc:MGI:108410]
Gm45033	158.655	0.452774	0.213539	2.12034	0.0339776	0.783346	133.933	183.377	1.36917	Not Sig	ENSMUSG00000108500	TEC	nonsignificant	predicted gene 45033 [Source:MGI Symbol;Acc:MGI:5753609]
Gm20379	54.3084	0.81513	0.384497	2.11999	0.0340068	0.783346	39.265	69.3518	1.76625	Not Sig	ENSMUSG00000100622	protein_coding	nonsignificant	predicted gene, 20379 [Source:MGI Symbol;Acc:MGI:5012564]
Pde4d	5270.96	-0.160522	0.0757234	-2.11985	0.0340185	0.783346	5563.93	4978	0.894692	Not Sig	ENSMUSG00000021699	protein_coding	nonsignificant	phosphodiesterase 4D, cAMP specific [Source:MGI Symbol;Acc:MGI:99555]
Gm21992	248.032	0.387222	0.182621	2.12036	0.0339756	0.783346	214.6	281.464	1.31158	Not Sig	ENSMUSG00000096370	protein_coding	nonsignificant	predicted gene 21992 [Source:MGI Symbol;Acc:MGI:5439461]
C330024D21Rik	17.4762	1.8914	0.892372	2.11952	0.0340468	0.783537	7.42218	27.5303	3.70919	Not Sig	ENSMUSG00000107385	lncRNA	nonsignificant	RIKEN cDNA C330024D21 gene [Source:MGI Symbol;Acc:MGI:2444116]
Gm50138	78.8151	0.647274	0.30547	2.11894	0.0340953	0.784192	61.4216	96.2087	1.56637	Not Sig	ENSMUSG00000118081	lncRNA	nonsignificant	predicted gene, 50138 [Source:MGI Symbol;Acc:MGI:6302886]
Hdgf	5895.92	-0.158327	0.0747386	-2.11841	0.0341401	0.78476	6219.68	5572.16	0.895891	Not Sig	ENSMUSG00000004897	protein_coding	nonsignificant	heparin binding growth factor [Source:MGI Symbol;Acc:MGI:1194494]
6330411D24Rik	6.75867	-2.51402	1.18702	-2.11792	0.0341821	0.78503	11.6055	1.91181	0.164733	Not Sig	ENSMUSG00000110067	protein_coding	nonsignificant	RIKEN cDNA 6330411D24 gene [Source:MGI Symbol;Acc:MGI:1917975]
Zfp992	133.895	0.627617	0.296353	2.1178	0.0341919	0.78503	104.675	163.115	1.5583	Not Sig	ENSMUSG00000070605	protein_coding	nonsignificant	zinc finger protein 992 [Source:MGI Symbol;Acc:MGI:3700963]
Gm37964	502.979	0.436793	0.206316	2.1171	0.0342511	0.785467	426.968	578.989	1.35605	Not Sig	ENSMUSG00000104398	TEC	nonsignificant	predicted gene, 37964 [Source:MGI Symbol;Acc:MGI:5611192]
Piezo1	321.65	0.374174	0.17672	2.11732	0.0342323	0.785467	280.197	363.103	1.29588	Not Sig	ENSMUSG00000014444	protein_coding	nonsignificant	piezo-type mechanosensitive ion channel component 1 [Source:MGI Symbol;Acc:MGI:3603204]
Inmt	20.7761	1.25188	0.59149	2.11649	0.034303	0.786197	12.3991	29.1531	2.35124	Not Sig	ENSMUSG00000003477	protein_coding	nonsignificant	indolethylamine N-methyltransferase [Source:MGI Symbol;Acc:MGI:102963]
Thumpd3	1768.2	0.192257	0.0908617	2.11593	0.0343511	0.786697	1649.8	1886.59	1.14353	Not Sig	ENSMUSG00000030264	protein_coding	nonsignificant	THUMP domain containing 3 [Source:MGI Symbol;Acc:MGI:1277973]
Acss3	141.827	0.653219	0.308774	2.11553	0.0343851	0.786697	110.377	173.278	1.56988	Not Sig	ENSMUSG00000035948	protein_coding	nonsignificant	acyl-CoA synthetase short-chain family member 3 [Source:MGI Symbol;Acc:MGI:2685720]
Gm6278	10.3784	-2.11085	0.997746	-2.11561	0.0343776	0.786697	16.6289	4.12785	0.248233	Not Sig	ENSMUSG00000116972	processed_pseudogene	nonsignificant	predicted gene 6278 [Source:MGI Symbol;Acc:MGI:3644862]
Gm18494	30.3197	1.00204	0.473858	2.11464	0.0344608	0.786798	20.1777	40.4617	2.00527	Not Sig	ENSMUSG00000115959	processed_pseudogene	nonsignificant	predicted gene, 18494 [Source:MGI Symbol;Acc:MGI:5010679]
Cd59a	212.543	0.582504	0.275427	2.11491	0.0344377	0.786798	170.44	254.647	1.49406	Not Sig	ENSMUSG00000032679	protein_coding	nonsignificant	CD59a antigen [Source:MGI Symbol;Acc:MGI:109177]
Rps11	2845.13	-0.216486	0.102389	-2.11434	0.0344863	0.786798	3059.86	2630.41	0.859649	Not Sig	ENSMUSG00000003429	protein_coding	nonsignificant	ribosomal protein S11 [Source:MGI Symbol;Acc:MGI:1351329]
Gm48094	8.79446	2.02548	0.957993	2.1143	0.03449	0.786798	3.40128	14.1876	4.17126	Not Sig	ENSMUSG00000111256	lncRNA	nonsignificant	predicted gene, 48094 [Source:MGI Symbol;Acc:MGI:6097440]
Hspa9-ps1	27.3632	1.32242	0.625443	2.11438	0.0344828	0.786798	15.5907	39.1357	2.5102	Not Sig	ENSMUSG00000081729	processed_pseudogene	nonsignificant	heat shock protein 9, pseudogene 1 [Source:MGI Symbol;Acc:MGI:96246]
Tmx4	22041.3	-0.127792	0.0604573	-2.11376	0.0345361	0.78739	23016.9	21065.7	0.915224	Not Sig	ENSMUSG00000034723	protein_coding	nonsignificant	thioredoxin-related transmembrane protein 4 [Source:MGI Symbol;Acc:MGI:106558]
Nup58	16.4512	1.59262	0.753638	2.11324	0.0345804	0.787559	8.1486	24.7538	3.03781	Not Sig	ENSMUSG00000063895	protein_coding	nonsignificant	nucleoporin 58 [Source:MGI Symbol;Acc:MGI:1919094]
Gm18284	63.2046	0.702453	0.332412	2.1132	0.0345837	0.787559	48.1111	78.298	1.62744	Not Sig	ENSMUSG00000092325	processed_pseudogene	nonsignificant	predicted gene, 18284 [Source:MGI Symbol;Acc:MGI:5010469]
Mtss2	11817.2	-0.153325	0.0726061	-2.11174	0.034709	0.789036	12445.2	11189.1	0.899071	Not Sig	ENSMUSG00000033763	protein_coding	nonsignificant	MTSS I-BAR domain containing 2 [Source:MGI Symbol;Acc:MGI:3039591]
Gm4654	28.4087	1.00055	0.473741	2.11202	0.0346847	0.789036	18.9415	37.876	1.99963	Not Sig	ENSMUSG00000098111	processed_pseudogene	nonsignificant	predicted gene 4654 [Source:MGI Symbol;Acc:MGI:3782836]
Sod2	16374.6	-0.129265	0.0612095	-2.11184	0.0347001	0.789036	17107.9	15641.3	0.914274	Not Sig	ENSMUSG00000006818	protein_coding	nonsignificant	superoxide dismutase 2, mitochondrial [Source:MGI Symbol;Acc:MGI:98352]
A930041C12Rik	24.2663	1.12703	0.533889	2.11098	0.034774	0.789595	15.1699	33.3627	2.19927	Not Sig	ENSMUSG00000085900	lncRNA	nonsignificant	RIKEN cDNA A930041C12 gene [Source:MGI Symbol;Acc:MGI:1925693]
	597.084	0.322211	0.152629	2.11107	0.0347662	0.789595	530.142	664.026	1.25254	Not Sig	ENSMUSG00000102151		nonsignificant
Atp2a2	63325.6	-0.136775	0.0648156	-2.11023	0.0348389	0.79061	66326	60325.3	0.909528	Not Sig	ENSMUSG00000029467	protein_coding	nonsignificant	ATPase, Ca++ transporting, cardiac muscle, slow twitch 2 [Source:MGI Symbol;Acc:MGI:88110]
Hnrnpd	12551.9	-0.147336	0.0698688	-2.10875	0.0349665	0.792599	13191.3	11912.6	0.903065	Not Sig	ENSMUSG00000000568	protein_coding	nonsignificant	heterogeneous nuclear ribonucleoprotein D [Source:MGI Symbol;Acc:MGI:101947]
A430028G04Rik	67.8544	0.756123	0.358566	2.10874	0.034967	0.792599	50.5299	85.1789	1.68572	Not Sig	ENSMUSG00000112417	TEC	nonsignificant	RIKEN cDNA A430028G04 gene [Source:MGI Symbol;Acc:MGI:2444187]
Gm28940	21.3075	1.20958	0.573804	2.108	0.0350312	0.792909	12.734	29.8811	2.34656	Not Sig	ENSMUSG00000100786	lncRNA	nonsignificant	predicted gene 28940 [Source:MGI Symbol;Acc:MGI:5579646]
Nol4	5056.89	-0.145905	0.0692123	-2.10807	0.0350249	0.792909	5312.58	4801.2	0.903742	Not Sig	ENSMUSG00000041923	protein_coding	nonsignificant	nucleolar protein 4 [Source:MGI Symbol;Acc:MGI:2441684]
Nap1l3	2917.6	-0.1646	0.0780878	-2.10788	0.0350414	0.792909	3084.44	2750.77	0.891823	Not Sig	ENSMUSG00000055733	protein_coding	nonsignificant	nucleosome assembly protein 1-like 3 [Source:MGI Symbol;Acc:MGI:1859565]
Psmd1	7396.26	-0.142295	0.0675538	-2.10639	0.0351704	0.793507	7760.68	7031.84	0.906086	Not Sig	ENSMUSG00000026229	protein_coding	nonsignificant	proteasome (prosome, macropain) 26S subunit, non-ATPase, 1 [Source:MGI Symbol;Acc:MGI:1917497]
Gm8818	91.458	0.575478	0.273128	2.10699	0.0351182	0.793507	73.4423	109.474	1.49061	Not Sig	ENSMUSG00000079138	processed_pseudogene	nonsignificant	predicted pseudogene 8818 [Source:MGI Symbol;Acc:MGI:3645903]
F11r	292.242	0.406541	0.19295	2.10697	0.0351199	0.793507	250.762	333.722	1.33083	Not Sig	ENSMUSG00000038235	protein_coding	nonsignificant	F11 receptor [Source:MGI Symbol;Acc:MGI:1321398]
Angptl3	176.25	0.459642	0.21823	2.10623	0.0351846	0.793507	148.208	204.293	1.37842	Not Sig	ENSMUSG00000028553	protein_coding	nonsignificant	angiopoietin-like 3 [Source:MGI Symbol;Acc:MGI:1353627]
Caln1	22180.8	-0.151309	0.0718618	-2.10556	0.035243	0.793507	23344.6	21017	0.900295	Not Sig	ENSMUSG00000060371	protein_coding	nonsignificant	calneuron 1 [Source:MGI Symbol;Acc:MGI:2155987]
Gm45159	5253.04	0.456727	0.216848	2.10621	0.0351859	0.793507	4427.93	6078.16	1.37269	Not Sig	ENSMUSG00000109125	lncRNA	nonsignificant	predicted gene 45159 [Source:MGI Symbol;Acc:MGI:5753735]
Map6	5458.61	-0.154381	0.073315	-2.10572	0.0352284	0.793507	5751.33	5165.9	0.89821	Not Sig	ENSMUSG00000055407	protein_coding	nonsignificant	microtubule-associated protein 6 [Source:MGI Symbol;Acc:MGI:1201690]
5830462O15Rik	98.1353	0.556376	0.264282	2.10524	0.0352706	0.793507	79.462	116.809	1.46999	Not Sig	ENSMUSG00000110972	TEC	nonsignificant	RIKEN cDNA 5830462O15 gene [Source:MGI Symbol;Acc:MGI:1923360]
Etv1	11406.5	-0.179822	0.08541	-2.10539	0.0352571	0.793507	12118.7	10694.3	0.88246	Not Sig	ENSMUSG00000004151	protein_coding	nonsignificant	ets variant 1 [Source:MGI Symbol;Acc:MGI:99254]
Cd70	2.14068	-4.36314	2.07244	-2.10531	0.0352641	0.793507	4.28137	0	0	Not Sig	ENSMUSG00000019489	protein_coding	nonsignificant	CD70 antigen [Source:MGI Symbol;Acc:MGI:1195273]
Gm37334	1001.38	0.305706	0.145354	2.10318	0.0354498	0.794468	895.854	1106.91	1.2356	Not Sig	ENSMUSG00000104525	TEC	nonsignificant	predicted gene, 37334 [Source:MGI Symbol;Acc:MGI:5610562]
Gm13292	44.8297	0.922524	0.438676	2.10297	0.0354683	0.794468	31.1538	58.5056	1.87796	Not Sig	ENSMUSG00000082424	transcribed_processed_pseudogene	nonsignificant	predicted gene 13292 [Source:MGI Symbol;Acc:MGI:3649470]
Gm12926	35.0309	0.892406	0.424399	2.10275	0.0354876	0.794468	24.4831	45.5787	1.86164	Not Sig	ENSMUSG00000081585	processed_pseudogene	nonsignificant	predicted gene 12926 [Source:MGI Symbol;Acc:MGI:3651535]
Gm44228	706.407	0.661387	0.314617	2.1022	0.0355357	0.794468	546.893	865.92	1.58334	Not Sig	ENSMUSG00000107996	TEC	nonsignificant	predicted gene, 44228 [Source:MGI Symbol;Acc:MGI:5690620]
Tulp3	1642.03	0.195582	0.0930461	2.10199	0.0355541	0.794468	1530.63	1753.42	1.14556	Not Sig	ENSMUSG00000001521	protein_coding	nonsignificant	TUB like protein 3 [Source:MGI Symbol;Acc:MGI:1329045]
Ikbkb	2745.98	0.173807	0.0826006	2.10418	0.0353625	0.794468	2581.26	2910.7	1.12763	Not Sig	ENSMUSG00000031537	protein_coding	nonsignificant	inhibitor of kappaB kinase beta [Source:MGI Symbol;Acc:MGI:1338071]
Gm18212	78.8002	0.79422	0.377699	2.10278	0.0354846	0.794468	57.7266	99.8738	1.73012	Not Sig	ENSMUSG00000109600	processed_pseudogene	nonsignificant	predicted gene, 18212 [Source:MGI Symbol;Acc:MGI:5010397]
Gm18368	66.7567	0.71882	0.341638	2.10404	0.0353752	0.794468	50.1427	83.3706	1.66267	Not Sig	ENSMUSG00000115107	transcribed_processed_pseudogene	nonsignificant	predicted gene, 18368 [Source:MGI Symbol;Acc:MGI:5010553]
	535.556	0.331442	0.157682	2.10196	0.0355568	0.794468	473.602	597.51	1.26163	Not Sig	ENSMUSG00000102562		nonsignificant
Paqr4	1203.37	-0.238821	0.113536	-2.10348	0.0354239	0.794468	1303.59	1103.15	0.846244	Not Sig	ENSMUSG00000023909	protein_coding	nonsignificant	progestin and adipoQ receptor family member IV [Source:MGI Symbol;Acc:MGI:1923748]
Firre	3929.1	0.168343	0.080053	2.1029	0.0354748	0.794468	3699.33	4158.88	1.12422	Not Sig	ENSMUSG00000085396	lncRNA	nonsignificant	functional intergenic repeating RNA element [Source:MGI Symbol;Acc:MGI:2147989]
Ids	33257.8	-0.134977	0.0642031	-2.10235	0.0355226	0.794468	34813.4	31702.2	0.910633	Not Sig	ENSMUSG00000035847	protein_coding	nonsignificant	iduronate 2-sulfatase [Source:MGI Symbol;Acc:MGI:96417]
Gm37773	539.93	0.369679	0.175996	2.1005	0.0356853	0.796352	470.713	609.147	1.29409	Not Sig	ENSMUSG00000104033	TEC	nonsignificant	predicted gene, 37773 [Source:MGI Symbol;Acc:MGI:5611001]
Dnajc16	4467.57	-0.156264	0.0744006	-2.1003	0.0357022	0.796352	4710.6	4224.55	0.896819	Not Sig	ENSMUSG00000040697	protein_coding	nonsignificant	DnaJ heat shock protein family (Hsp40) member C16 [Source:MGI Symbol;Acc:MGI:2442146]
Car5b	303.066	0.348495	0.165912	2.10049	0.0356862	0.796352	266.621	339.512	1.27339	Not Sig	ENSMUSG00000031373	protein_coding	nonsignificant	carbonic anhydrase 5b, mitochondrial [Source:MGI Symbol;Acc:MGI:1926249]
Gm42815	7.56543	2.03204	0.967995	2.09922	0.0357975	0.79799	2.96275	12.1681	4.10703	Not Sig	ENSMUSG00000104686	TEC	nonsignificant	predicted gene 42815 [Source:MGI Symbol;Acc:MGI:5662952]
2010310C07Rik	17.0592	1.29243	0.61587	2.09854	0.0358571	0.79799	9.89604	24.2224	2.44769	Not Sig	ENSMUSG00000101268	lncRNA	nonsignificant	RIKEN cDNA 2010310C07 gene [Source:MGI Symbol;Acc:MGI:1919381]
A230057D06Rik	2618.49	0.251916	0.120038	2.09864	0.035849	0.79799	2390	2846.98	1.19121	Not Sig	ENSMUSG00000109394	lncRNA	nonsignificant	RIKEN cDNA A230057D06 gene [Source:MGI Symbol;Acc:MGI:2442922]
AA543401	37.0099	0.906061	0.431722	2.09871	0.0358422	0.79799	25.8368	48.1831	1.8649	Not Sig	ENSMUSG00000092125	processed_pseudogene	nonsignificant	cDNA sequence, AA543401 [Source:MGI Symbol;Acc:MGI:2155152]
Lrrc4c	7616.74	-0.161911	0.0771651	-2.09823	0.0358844	0.798143	8043.16	7190.31	0.893966	Not Sig	ENSMUSG00000050587	protein_coding	nonsignificant	leucine rich repeat containing 4C [Source:MGI Symbol;Acc:MGI:2442636]
Slc7a3	264.247	-0.454092	0.21645	-2.0979	0.0359137	0.798341	305.7	222.794	0.7288	Not Sig	ENSMUSG00000031297	protein_coding	nonsignificant	solute carrier family 7 (cationic amino acid transporter, y+ system), member 3 [Source:MGI Symbol;Acc:MGI:1100521]
Gm38069	99.4112	0.612734	0.292283	2.09637	0.0360494	0.798471	78.472	120.35	1.53367	Not Sig	ENSMUSG00000103561	TEC	nonsignificant	predicted gene, 38069 [Source:MGI Symbol;Acc:MGI:5611297]
Sulf1	1132.39	1.35759	0.649218	2.09111	0.0365182	0.798471	635.729	1629.06	2.5625	Not Sig	ENSMUSG00000016918	protein_coding	nonsignificant	sulfatase 1 [Source:MGI Symbol;Acc:MGI:2138563]
Gm8850	83.5929	0.670479	0.320411	2.09256	0.0363886	0.798471	64.1529	103.033	1.60605	Not Sig	ENSMUSG00000104181	processed_pseudogene	nonsignificant	predicted gene 8850 [Source:MGI Symbol;Acc:MGI:3647325]
Gm13360	32.1703	0.935167	0.447572	2.08942	0.0366695	0.798471	22.1567	42.1839	1.90389	Not Sig	ENSMUSG00000082164	processed_pseudogene	nonsignificant	predicted gene 13360 [Source:MGI Symbol;Acc:MGI:3652147]
Tor4a	95.2729	0.677171	0.322876	2.09731	0.035966	0.798471	72.9869	117.559	1.61069	Not Sig	ENSMUSG00000059555	protein_coding	nonsignificant	torsin family 4, member A [Source:MGI Symbol;Acc:MGI:2442720]
Ryr3	13201.4	0.173618	0.0827943	2.09698	0.0359952	0.798471	12407.6	13995.2	1.12795	Not Sig	ENSMUSG00000057378	protein_coding	nonsignificant	ryanodine receptor 3 [Source:MGI Symbol;Acc:MGI:99684]
Pcsk2	15494.2	-0.162692	0.0777336	-2.09294	0.0363541	0.798471	16367.2	14621.2	0.893323	Not Sig	ENSMUSG00000027419	protein_coding	nonsignificant	proprotein convertase subtilisin/kexin type 2 [Source:MGI Symbol;Acc:MGI:97512]
Vangl1	315.33	0.3741	0.178717	2.09326	0.036326	0.798471	275.178	355.482	1.29183	Not Sig	ENSMUSG00000027860	protein_coding	nonsignificant	VANGL planar cell polarity 1 [Source:MGI Symbol;Acc:MGI:2159344]
	1.83764	4.50655	2.15641	2.08984	0.0366324	0.798471	0	3.67528	Inf	Not Sig	ENSMUSG00000085375		nonsignificant
Dhcr24	2809.81	-0.178668	0.0853422	-2.09355	0.0363004	0.798471	2984.51	2635.1	0.882927	Not Sig	ENSMUSG00000034926	protein_coding	nonsignificant	24-dehydrocholesterol reductase [Source:MGI Symbol;Acc:MGI:1922004]
Slc4a2	1492.52	0.539694	0.257529	2.09566	0.036112	0.798471	1216.45	1768.6	1.4539	Not Sig	ENSMUSG00000028962	protein_coding	nonsignificant	solute carrier family 4 (anion exchanger), member 2 [Source:MGI Symbol;Acc:MGI:109351]
Speer4a1	206.997	0.522256	0.249659	2.09188	0.0364494	0.798471	170.338	243.655	1.43042	Not Sig	ENSMUSG00000073119	protein_coding	nonsignificant	spermatogenesis associated glutamate (E)-rich protein 4A1 [Source:MGI Symbol;Acc:MGI:1922907]
Fis1	2309.26	-0.18168	0.086747	-2.09436	0.0362278	0.798471	2455.54	2162.98	0.880856	Not Sig	ENSMUSG00000019054	protein_coding	nonsignificant	fission, mitochondrial 1 [Source:MGI Symbol;Acc:MGI:1913687]
Ephb6	2683.07	-0.194029	0.0928497	-2.08971	0.0366441	0.798471	2864.73	2501.42	0.873176	Not Sig	ENSMUSG00000029869	protein_coding	nonsignificant	Eph receptor B6 [Source:MGI Symbol;Acc:MGI:1096338]
Gm44104	265.15	0.348864	0.166955	2.08957	0.0366568	0.798471	233.389	296.911	1.27217	Not Sig	ENSMUSG00000107583	TEC	nonsignificant	predicted gene, 44104 [Source:MGI Symbol;Acc:MGI:5690496]
Rpl36-ps12	42.2986	0.851181	0.406103	2.09598	0.0360844	0.798471	30.1196	54.4776	1.80871	Not Sig	ENSMUSG00000091845	transcribed_processed_pseudogene	nonsignificant	ribosomal protein L36, pseudogene 12 [Source:MGI Symbol;Acc:MGI:3782787]
Tas2r113	1.83764	4.50655	2.15641	2.08984	0.0366324	0.798471	0	3.67528	Inf	Not Sig	ENSMUSG00000056926	protein_coding	nonsignificant	taste receptor, type 2, member 113 [Source:MGI Symbol;Acc:MGI:2681217]
Gm6946	2.17233	4.7291	2.25809	2.09429	0.0362337	0.798471	0	4.34467	Inf	Not Sig	ENSMUSG00000098135	processed_pseudogene	nonsignificant	predicted gene 6946 [Source:MGI Symbol;Acc:MGI:3647908]
4930567K12Rik	174.312	0.437509	0.209267	2.09067	0.0365574	0.798471	148.101	200.522	1.35396	Not Sig	ENSMUSG00000109382	lncRNA	nonsignificant	RIKEN cDNA 4930567K12 gene [Source:MGI Symbol;Acc:MGI:1923095]
Gm45200	109.672	0.514335	0.246171	2.08934	0.0366768	0.798471	90.0947	129.25	1.4346	Not Sig	ENSMUSG00000109257	TEC	nonsignificant	predicted gene 45200 [Source:MGI Symbol;Acc:MGI:5753776]
Gm14382	58.752	0.781414	0.373287	2.09334	0.0363192	0.798471	43.0726	74.4313	1.72804	Not Sig	ENSMUSG00000082210	processed_pseudogene	nonsignificant	predicted gene 14382 [Source:MGI Symbol;Acc:MGI:3650372]
Gm17137	230.628	0.408203	0.195058	2.09272	0.0363739	0.798471	197.722	263.534	1.33285	Not Sig	ENSMUSG00000090559	transcribed_processed_pseudogene	nonsignificant	predicted gene 17137 [Source:MGI Symbol;Acc:MGI:4937964]
Gm35147	9.91232	2.0913	0.999083	2.09322	0.0363291	0.798471	3.81398	16.0107	4.19788	Not Sig	ENSMUSG00000108849	lncRNA	nonsignificant	predicted gene, 35147 [Source:MGI Symbol;Acc:MGI:5594306]
Nup93	3212.43	0.163364	0.0778837	2.09754	0.035946	0.798471	3029.91	3394.95	1.12048	Not Sig	ENSMUSG00000032939	protein_coding	nonsignificant	nucleoporin 93 [Source:MGI Symbol;Acc:MGI:1919055]
Tubg1	1161.89	-0.218671	0.104548	-2.0916	0.0364746	0.798471	1250.47	1073.32	0.858334	Not Sig	ENSMUSG00000035198	protein_coding	nonsignificant	tubulin, gamma 1 [Source:MGI Symbol;Acc:MGI:101834]
Gm11652	118.182	0.542256	0.258874	2.09467	0.0362005	0.798471	96.0459	140.319	1.46095	Not Sig	ENSMUSG00000083465	processed_pseudogene	nonsignificant	predicted gene 11652 [Source:MGI Symbol;Acc:MGI:3651204]
Cep295nl	71.4879	0.664411	0.317573	2.09215	0.0364252	0.798471	55.2971	87.6787	1.58559	Not Sig	ENSMUSG00000076433	protein_coding	nonsignificant	CEP295 N-terminal like [Source:MGI Symbol;Acc:MGI:1929713]
Sdc1	50.562	0.793239	0.379276	2.09146	0.0364873	0.798471	37.2466	63.8775	1.71499	Not Sig	ENSMUSG00000020592	protein_coding	nonsignificant	syndecan 1 [Source:MGI Symbol;Acc:MGI:1349162]
Gm48837	40.1628	-0.914857	0.436923	-2.09386	0.0362722	0.798471	52.2081	28.1176	0.538568	Not Sig	ENSMUSG00000114536	lncRNA	nonsignificant	predicted gene, 48837 [Source:MGI Symbol;Acc:MGI:6098566]
Gm48601	196.725	1.15459	0.550997	2.09546	0.0361305	0.798471	122.057	271.393	2.22349	Not Sig	ENSMUSG00000114431	TEC	nonsignificant	predicted gene, 48601 [Source:MGI Symbol;Acc:MGI:6098180]
Xkr6	1049.14	0.301924	0.144456	2.09007	0.0366111	0.798471	940.376	1157.9	1.23132	Not Sig	ENSMUSG00000035067	protein_coding	nonsignificant	X-linked Kx blood group related 6 [Source:MGI Symbol;Acc:MGI:2447765]
Cd47	21343.3	-0.141069	0.0675249	-2.08915	0.0366947	0.798471	22386.3	20300.3	0.906817	Not Sig	ENSMUSG00000055447	protein_coding	nonsignificant	CD47 antigen (Rh-related antigen, integrin-associated signal transducer) [Source:MGI Symbol;Acc:MGI:96617]
Gm50008	56.0162	0.816046	0.389191	2.09678	0.0360133	0.798471	40.4833	71.5492	1.76737	Not Sig	ENSMUSG00000117538	TEC	nonsignificant	predicted gene, 50008 [Source:MGI Symbol;Acc:MGI:6275293]
Zfp521	744.979	0.251803	0.120448	2.09055	0.0365685	0.798471	679.766	810.191	1.19187	Not Sig	ENSMUSG00000024420	protein_coding	nonsignificant	zinc finger protein 521 [Source:MGI Symbol;Acc:MGI:95459]
Spink13	15.1955	1.40952	0.672572	2.09572	0.036107	0.798471	8.2519	22.1391	2.68291	Not Sig	ENSMUSG00000073551	protein_coding	nonsignificant	serine peptidase inhibitor, Kazal type 13 [Source:MGI Symbol;Acc:MGI:3642511]
Trpm3	12620.4	0.591344	0.282788	2.09112	0.0365171	0.798471	10069.2	15171.5	1.50673	Not Sig	ENSMUSG00000052387	protein_coding	nonsignificant	transient receptor potential cation channel, subfamily M, member 3 [Source:MGI Symbol;Acc:MGI:2443101]
Gnl3l	17880.9	-0.144037	0.0688388	-2.09238	0.0364042	0.798471	18774	16987.8	0.904856	Not Sig	ENSMUSG00000025266	protein_coding	nonsignificant	guanine nucleotide binding protein nucleolar 3 like [Source:MGI Symbol;Acc:MGI:2448557]
Capza1b	2.28074	4.80791	2.29339	2.09642	0.036045	0.798471	0	4.56149	Inf	Not Sig	ENSMUSG00000055357	protein_coding	nonsignificant	capping actin protein of muscle Z-line subunit alpha 1B [Source:MGI Symbol;Acc:MGI:1913997]
Mxi1	2498.38	-0.181173	0.0867442	-2.08859	0.0367448	0.799117	2656.15	2340.61	0.881205	Not Sig	ENSMUSG00000025025	protein_coding	nonsignificant	MAX interactor 1, dimerization protein [Source:MGI Symbol;Acc:MGI:97245]
Spaca6	3537.19	0.215603	0.103243	2.08831	0.0367696	0.799213	3271.41	3802.96	1.16248	Not Sig	ENSMUSG00000080316	protein_coding	nonsignificant	sperm acrosome associated 6 [Source:MGI Symbol;Acc:MGI:1922452]
H2-T24	490.238	0.318548	0.15256	2.08801	0.0367967	0.799359	435.871	544.605	1.24946	Not Sig	ENSMUSG00000053835	protein_coding	nonsignificant	histocompatibility 2, T region locus 24 [Source:MGI Symbol;Acc:MGI:95958]
Gm43376	432.974	0.356365	0.170729	2.08731	0.0368598	0.799383	379.471	486.477	1.28199	Not Sig	ENSMUSG00000104677	lncRNA	nonsignificant	predicted gene 43376 [Source:MGI Symbol;Acc:MGI:5663513]
Gm43882	448.337	0.446065	0.213701	2.08733	0.0368579	0.799383	379.018	517.656	1.36578	Not Sig	ENSMUSG00000107433	TEC	nonsignificant	predicted gene, 43882 [Source:MGI Symbol;Acc:MGI:5690274]
Gm44801	1111.14	0.868675	0.416213	2.0871	0.0368795	0.799383	786.333	1435.94	1.82612	Not Sig	ENSMUSG00000109529	TEC	nonsignificant	predicted gene 44801 [Source:MGI Symbol;Acc:MGI:5753377]
Mapre2	14671.1	-0.139088	0.0666372	-2.08724	0.0368664	0.799383	15379	13963.2	0.907938	Not Sig	ENSMUSG00000024277	protein_coding	nonsignificant	microtubule-associated protein, RP/EB family, member 2 [Source:MGI Symbol;Acc:MGI:106271]
Pltp	1013.66	0.29685	0.142249	2.08683	0.0369036	0.799463	909.667	1117.66	1.22865	Not Sig	ENSMUSG00000017754	protein_coding	nonsignificant	phospholipid transfer protein [Source:MGI Symbol;Acc:MGI:103151]
Apobec4	151.507	0.455166	0.218268	2.08536	0.0370368	0.799693	127.657	175.358	1.37367	Not Sig	ENSMUSG00000055547	protein_coding	nonsignificant	apolipoprotein B mRNA editing enzyme catalytic polypeptide-like 4 [Source:MGI Symbol;Acc:MGI:1918531]
Snhg7os	6.51077	2.14712	1.02958	2.08544	0.0370294	0.799693	2.41471	10.6068	4.3926	Not Sig	ENSMUSG00000086775	lncRNA	nonsignificant	small nucleolar RNA host gene 7, opposite strand [Source:MGI Symbol;Acc:MGI:3045374]
Btbd8	7519.94	-0.142552	0.0683549	-2.08547	0.0370265	0.799693	7892.32	7147.55	0.905633	Not Sig	ENSMUSG00000111375	protein_coding	nonsignificant	BTB domain containing 8 [Source:MGI Symbol;Acc:MGI:3646208]
5330437M03Rik	389.009	0.41546	0.199227	2.08536	0.0370368	0.799693	332.371	445.647	1.34081	Not Sig	ENSMUSG00000106855	TEC	nonsignificant	RIKEN cDNA 5330437M03 gene [Source:MGI Symbol;Acc:MGI:2444650]
Arsg	953.485	0.278421	0.13347	2.08602	0.0369772	0.799693	861.214	1045.76	1.21428	Not Sig	ENSMUSG00000020604	protein_coding	nonsignificant	arylsulfatase G [Source:MGI Symbol;Acc:MGI:1921258]
Cmbl	365.487	-0.351501	0.168537	-2.08561	0.0370143	0.799693	410.163	320.811	0.782156	Not Sig	ENSMUSG00000022235	protein_coding	nonsignificant	carboxymethylenebutenolidase homolog [Source:MGI Symbol;Acc:MGI:1916824]
Lpgat1	16449.9	-0.130091	0.0624038	-2.08466	0.0371003	0.800492	17191.9	15707.9	0.913682	Not Sig	ENSMUSG00000026623	protein_coding	nonsignificant	lysophosphatidylglycerol acyltransferase 1 [Source:MGI Symbol;Acc:MGI:2446186]
Rnf157	15960	-0.143422	0.0688042	-2.0845	0.0371147	0.800492	16754.1	15166	0.905207	Not Sig	ENSMUSG00000052949	protein_coding	nonsignificant	ring finger protein 157 [Source:MGI Symbol;Acc:MGI:2442484]
Ccl19	84.7143	0.691601	0.331954	2.08342	0.0372126	0.80131	64.81	104.619	1.61424	Not Sig	ENSMUSG00000071005	protein_coding	nonsignificant	C-C motif chemokine ligand 19 [Source:MGI Symbol;Acc:MGI:1346316]
Gm47818	2.94951	-3.7684	1.80877	-2.08341	0.0372141	0.80131	5.49016	0.408861	0.0744717	Not Sig	ENSMUSG00000111250	lncRNA	nonsignificant	predicted gene, 47818 [Source:MGI Symbol;Acc:MGI:6097006]
Stmn1-rs1	33.8888	1.03121	0.494867	2.0838	0.0371781	0.80131	22.1244	45.6531	2.06348	Not Sig	ENSMUSG00000111564	processed_pseudogene	nonsignificant	stathmin 1, related sequence 1 [Source:MGI Symbol;Acc:MGI:96740]
Cyc1	3087.18	-0.174974	0.0840094	-2.08279	0.0372705	0.802084	3275.8	2898.57	0.884844	Not Sig	ENSMUSG00000022551	protein_coding	nonsignificant	cytochrome c-1 [Source:MGI Symbol;Acc:MGI:1913695]
Gm44152	220.086	0.405329	0.194652	2.08233	0.0373122	0.802541	188.724	251.447	1.33235	Not Sig	ENSMUSG00000108152	TEC	nonsignificant	predicted gene, 44152 [Source:MGI Symbol;Acc:MGI:5690544]
Pam	13913.9	-0.134081	0.0644179	-2.08143	0.0373949	0.802905	14560.3	13267.6	0.911212	Not Sig	ENSMUSG00000026335	protein_coding	nonsignificant	peptidylglycine alpha-amidating monooxygenase [Source:MGI Symbol;Acc:MGI:97475]
Phf24	11166.5	-0.139902	0.0672022	-2.08181	0.03736	0.802905	11706.8	10626.2	0.907691	Not Sig	ENSMUSG00000036062	protein_coding	nonsignificant	PHD finger protein 24 [Source:MGI Symbol;Acc:MGI:2140712]
Slc37a2	269.473	0.53175	0.25549	2.0813	0.0374069	0.802905	220.08	318.866	1.44886	Not Sig	ENSMUSG00000032122	protein_coding	nonsignificant	solute carrier family 37 (glycerol-3-phosphate transporter), member 2 [Source:MGI Symbol;Acc:MGI:1929693]
Gm4939	74.7959	0.627871	0.30168	2.08125	0.0374112	0.802905	58.7999	90.7919	1.54408	Not Sig	ENSMUSG00000114529	processed_pseudogene	nonsignificant	predicted gene 4939 [Source:MGI Symbol;Acc:MGI:3646780]
Ppargc1a	5257.27	-0.142074	0.0683091	-2.07987	0.0375376	0.804317	5516.15	4998.38	0.906135	Not Sig	ENSMUSG00000029167	protein_coding	nonsignificant	peroxisome proliferative activated receptor, gamma, coactivator 1 alpha [Source:MGI Symbol;Acc:MGI:1342774]
Gm27252	95.8309	0.552787	0.265773	2.07992	0.0375331	0.804317	77.8829	113.779	1.4609	Not Sig	ENSMUSG00000098708	lncRNA	nonsignificant	predicted gene 27252 [Source:MGI Symbol;Acc:MGI:5521095]
Marveld2	77.586	-0.717207	0.344835	-2.07986	0.0375386	0.804317	96.3613	58.8106	0.610313	Not Sig	ENSMUSG00000021636	protein_coding	nonsignificant	MARVEL (membrane-associating) domain containing 2 [Source:MGI Symbol;Acc:MGI:2446166]
Tmem222	1493.2	-0.188347	0.0905776	-2.0794	0.0375808	0.80478	1591.39	1395.01	0.8766	Not Sig	ENSMUSG00000028857	protein_coding	nonsignificant	transmembrane protein 222 [Source:MGI Symbol;Acc:MGI:1098568]
Tmem9	1421.79	-0.205875	0.0991675	-2.07604	0.0378906	0.805246	1524.29	1319.3	0.865516	Not Sig	ENSMUSG00000026411	protein_coding	nonsignificant	transmembrane protein 9 [Source:MGI Symbol;Acc:MGI:1913491]
Gm37783	229.766	0.394622	0.190016	2.07678	0.0378216	0.805246	198.161	261.37	1.31898	Not Sig	ENSMUSG00000102523	TEC	nonsignificant	predicted gene, 37783 [Source:MGI Symbol;Acc:MGI:5611011]
Bpifb9a	8.53802	1.92799	0.928657	2.0761	0.0378846	0.805246	3.55495	13.5211	3.80345	Not Sig	ENSMUSG00000067998	protein_coding	nonsignificant	BPI fold containing family B, member 9A [Source:MGI Symbol;Acc:MGI:3767993]
Gm43149	61.574	0.696604	0.335488	2.07639	0.0378579	0.805246	47.1255	76.0224	1.61319	Not Sig	ENSMUSG00000105229	lncRNA	nonsignificant	predicted gene 43149 [Source:MGI Symbol;Acc:MGI:5663286]
Rnf11	11839.9	-0.137697	0.0662839	-2.07738	0.0377663	0.805246	12405.3	11274.4	0.908841	Not Sig	ENSMUSG00000028557	protein_coding	nonsignificant	ring finger protein 11 [Source:MGI Symbol;Acc:MGI:1352759]
Gm43321	797.605	0.777366	0.374334	2.07666	0.0378325	0.805246	587.523	1007.69	1.71514	Not Sig	ENSMUSG00000106408	TEC	nonsignificant	predicted gene 43321 [Source:MGI Symbol;Acc:MGI:5663458]
Gm42639	239.988	0.526133	0.253347	2.07673	0.0378265	0.805246	196.316	283.659	1.44491	Not Sig	ENSMUSG00000104871	TEC	nonsignificant	predicted gene 42639 [Source:MGI Symbol;Acc:MGI:5662776]
Reep1	6075.87	-0.156575	0.0753582	-2.07774	0.037733	0.805246	6406.15	5745.59	0.896886	Not Sig	ENSMUSG00000052852	protein_coding	nonsignificant	receptor accessory protein 1 [Source:MGI Symbol;Acc:MGI:1098827]
Trim43c	59.1499	0.73245	0.352582	2.07739	0.0377657	0.805246	44.5251	73.7747	1.65692	Not Sig	ENSMUSG00000067399	protein_coding	nonsignificant	tripartite motif-containing 43C [Source:MGI Symbol;Acc:MGI:3647365]
Gm47815	145.559	0.513628	0.247196	2.07782	0.0377263	0.805246	119.782	171.337	1.4304	Not Sig	ENSMUSG00000111171	lncRNA	nonsignificant	predicted gene, 47815 [Source:MGI Symbol;Acc:MGI:6097001]
Zfp874a	1201.04	-0.201296	0.0969543	-2.07619	0.0378763	0.805246	1284.31	1117.76	0.870315	Not Sig	ENSMUSG00000069206	protein_coding	nonsignificant	zinc finger protein 874a [Source:MGI Symbol;Acc:MGI:3040703]
Gm49130	50.4847	0.76715	0.369244	2.07763	0.0377438	0.805246	37.2456	63.7237	1.7109	Not Sig	ENSMUSG00000115234	lncRNA	nonsignificant	predicted gene, 49130 [Source:MGI Symbol;Acc:MGI:6118539]
Gm20324	93.7124	0.613647	0.295175	2.07893	0.0376242	0.805246	73.7776	113.647	1.5404	Not Sig	ENSMUSG00000100199	lncRNA	nonsignificant	predicted gene, 20324 [Source:MGI Symbol;Acc:MGI:5012509]
Gm53028	109.799	0.560051	0.26976	2.07611	0.037884	0.805246	88.7762	130.821	1.4736	Not Sig	ENSMUSG00000116590	lncRNA	nonsignificant	predicted gene, 53028 [Source:MGI Symbol;Acc:MGI:6388920]
Gm44224	17.98	1.27928	0.616379	2.07547	0.0379426	0.805916	10.4017	25.5583	2.45714	Not Sig	ENSMUSG00000108286	TEC	nonsignificant	predicted gene, 44224 [Source:MGI Symbol;Acc:MGI:5690616]
Klc2	6743.92	-0.188149	0.0906696	-2.07511	0.0379766	0.806199	7184.95	6302.9	0.877236	Not Sig	ENSMUSG00000024862	protein_coding	nonsignificant	kinesin light chain 2 [Source:MGI Symbol;Acc:MGI:107953]
Gpd2	12558.1	-0.14684	0.0707873	-2.07438	0.0380438	0.807188	13198.1	11918.1	0.903017	Not Sig	ENSMUSG00000026827	protein_coding	nonsignificant	glycerol phosphate dehydrogenase 2, mitochondrial [Source:MGI Symbol;Acc:MGI:99778]
Gm18991	74.3383	0.630543	0.304066	2.0737	0.0381068	0.807476	58.4317	90.245	1.54445	Not Sig	ENSMUSG00000110394	processed_pseudogene	nonsignificant	predicted gene, 18991 [Source:MGI Symbol;Acc:MGI:5011176]
Cacnb1	5620.19	-0.174884	0.0843245	-2.07394	0.0380847	0.807476	5961.58	5278.79	0.885468	Not Sig	ENSMUSG00000020882	protein_coding	nonsignificant	calcium channel, voltage-dependent, beta 1 subunit [Source:MGI Symbol;Acc:MGI:102522]
Gm22500	49.9269	0.803414	0.387455	2.07357	0.0381192	0.807476	36.5611	63.2926	1.73115	Not Sig	ENSMUSG00000089607	snRNA	nonsignificant	predicted gene, 22500 [Source:MGI Symbol;Acc:MGI:5452277]
Or5w12	2.5217	3.93427	1.89935	2.07137	0.0383241	0.808856	0.274023	4.76937	17.405	Not Sig	ENSMUSG00000075153	protein_coding	nonsignificant	olfactory receptor family 5 subfamily W member 12 [Source:MGI Symbol;Acc:MGI:3030969]
Rasgrp1	46612.1	-0.1593	0.0768922	-2.07173	0.0382904	0.808856	49183.4	44040.9	0.895442	Not Sig	ENSMUSG00000027347	protein_coding	nonsignificant	RAS guanyl releasing protein 1 [Source:MGI Symbol;Acc:MGI:1314635]
Gm43320	1173.47	0.692706	0.334428	2.07132	0.038329	0.808856	896.714	1450.22	1.61726	Not Sig	ENSMUSG00000106414	TEC	nonsignificant	predicted gene 43320 [Source:MGI Symbol;Acc:MGI:5663457]
Zfp605	1484.21	-0.200579	0.096789	-2.07233	0.0382342	0.808856	1587.97	1380.45	0.869315	Not Sig	ENSMUSG00000023284	protein_coding	nonsignificant	zinc finger protein 605 [Source:MGI Symbol;Acc:MGI:2444933]
Gm44741	163.695	0.498503	0.240579	2.07209	0.0382566	0.808856	135.432	191.958	1.41738	Not Sig	ENSMUSG00000109057	TEC	nonsignificant	predicted gene 44741 [Source:MGI Symbol;Acc:MGI:5753317]
Rab3a	17804.9	-0.156935	0.0757624	-2.07141	0.0383205	0.808856	18774	16835.8	0.896757	Not Sig	ENSMUSG00000031840	protein_coding	nonsignificant	RAB3A, member RAS oncogene family [Source:MGI Symbol;Acc:MGI:97843]
Ltbp3	1122.7	0.229798	0.110939	2.07139	0.038322	0.808856	1033.02	1212.37	1.17361	Not Sig	ENSMUSG00000024940	protein_coding	nonsignificant	latent transforming growth factor beta binding protein 3 [Source:MGI Symbol;Acc:MGI:1101355]
Eqtn	102.834	0.7191	0.347278	2.07068	0.0383891	0.809547	77.3547	128.313	1.65876	Not Sig	ENSMUSG00000028575	protein_coding	nonsignificant	equatorin, sperm acrosome associated [Source:MGI Symbol;Acc:MGI:1915003]
Mir344	18.2268	1.26891	0.612844	2.07053	0.0384031	0.809547	10.7181	25.7355	2.40112	Not Sig	ENSMUSG00000065568	miRNA	nonsignificant	microRNA 344 [Source:MGI Symbol;Acc:MGI:3619359]
Ccl25	1499.1	0.240243	0.116085	2.06955	0.0384945	0.809784	1372.96	1625.23	1.18374	Not Sig	ENSMUSG00000023235	protein_coding	nonsignificant	C-C motif chemokine ligand 25 [Source:MGI Symbol;Acc:MGI:1099448]
Fcho1	2316.07	-0.187257	0.0904576	-2.07011	0.0384423	0.809784	2466.66	2165.48	0.877899	Not Sig	ENSMUSG00000070000	protein_coding	nonsignificant	FCH domain only 1 [Source:MGI Symbol;Acc:MGI:1921265]
Mypn	74.3042	-0.650935	0.314534	-2.06952	0.0384971	0.809784	90.5342	58.0742	0.641461	Not Sig	ENSMUSG00000020067	protein_coding	nonsignificant	myopalladin [Source:MGI Symbol;Acc:MGI:1916052]
Epb41l3	11526.2	-0.154392	0.0746001	-2.06959	0.0384907	0.809784	12143.1	10909.2	0.898388	Not Sig	ENSMUSG00000024044	protein_coding	nonsignificant	erythrocyte membrane protein band 4.1 like 3 [Source:MGI Symbol;Acc:MGI:103008]
Ssr2	1773.62	-0.172558	0.0834377	-2.06811	0.03863	0.810837	1879.7	1667.54	0.887128	Not Sig	ENSMUSG00000041355	protein_coding	nonsignificant	signal sequence receptor, beta [Source:MGI Symbol;Acc:MGI:1913506]
Vmn1r32	11.6875	-1.72512	0.834069	-2.06832	0.0386104	0.810837	17.8648	5.51008	0.308432	Not Sig	ENSMUSG00000062905	protein_coding	nonsignificant	vomeronasal 1 receptor 32 [Source:MGI Symbol;Acc:MGI:2159451]
Gm49069	1437.25	0.757988	0.366457	2.06842	0.0386003	0.810837	1067.91	1806.59	1.69171	Not Sig	ENSMUSG00000114970	TEC	nonsignificant	predicted gene, 49069 [Source:MGI Symbol;Acc:MGI:6118452]
Pcdhgb4	666.553	0.277431	0.134145	2.06814	0.0386266	0.810837	601.513	731.592	1.21625	Not Sig	ENSMUSG00000103585	protein_coding	nonsignificant	protocadherin gamma subfamily B, 4 [Source:MGI Symbol;Acc:MGI:1935173]
Gm42969	301.632	0.437439	0.211558	2.0677	0.0386679	0.811191	255.572	347.692	1.36045	Not Sig	ENSMUSG00000105822	TEC	nonsignificant	predicted gene 42969 [Source:MGI Symbol;Acc:MGI:5663106]
Gm44636	53.9602	0.749203	0.362374	2.06749	0.0386883	0.811191	40.3282	67.5922	1.67605	Not Sig	ENSMUSG00000108704	TEC	nonsignificant	predicted gene 44636 [Source:MGI Symbol;Acc:MGI:5753212]
Gm9898	2.16502	4.72131	2.28812	2.0634	0.0390748	0.811717	0	4.33004	Inf	Not Sig	ENSMUSG00000053185	lncRNA	nonsignificant	predicted gene 9898 [Source:MGI Symbol;Acc:MGI:3642391]
Tsga10	2807.96	0.214569	0.103987	2.06341	0.0390734	0.811717	2599.98	3015.93	1.15998	Not Sig	ENSMUSG00000060771	protein_coding	nonsignificant	testis specific 10 [Source:MGI Symbol;Acc:MGI:2685063]
	326.04	0.402104	0.194628	2.06601	0.0388275	0.811717	280.752	371.329	1.32262	Not Sig	ENSMUSG00000102142		nonsignificant
Gm38187	141.71	0.571773	0.277086	2.06352	0.039063	0.811717	113.795	169.625	1.49063	Not Sig	ENSMUSG00000102403	TEC	nonsignificant	predicted gene, 38187 [Source:MGI Symbol;Acc:MGI:5611415]
Gm15428	2.04715	4.6735	2.26529	2.06309	0.039104	0.811717	0	4.0943	Inf	Not Sig	ENSMUSG00000046057	processed_pseudogene	nonsignificant	predicted pseudogene 15428 [Source:MGI Symbol;Acc:MGI:3642670]
Gm37342	54.9991	0.83756	0.405818	2.06388	0.0390288	0.811717	39.5742	70.424	1.77954	Not Sig	ENSMUSG00000102732	TEC	nonsignificant	predicted gene, 37342 [Source:MGI Symbol;Acc:MGI:5610570]
Tlr2	42.8907	0.927455	0.448721	2.06689	0.0387448	0.811717	29.344	56.4375	1.92331	Not Sig	ENSMUSG00000027995	protein_coding	nonsignificant	toll-like receptor 2 [Source:MGI Symbol;Acc:MGI:1346060]
Gm7347	103.755	0.624607	0.302435	2.06526	0.0388983	0.811717	81.5901	125.92	1.54333	Not Sig	ENSMUSG00000073117	protein_coding	nonsignificant	predicted gene 7347 [Source:MGI Symbol;Acc:MGI:3645983]
Gm20548	107.93	0.544733	0.264012	2.06329	0.0390853	0.811717	87.5562	128.303	1.46538	Not Sig	ENSMUSG00000092354	lncRNA	nonsignificant	predicted gene 20548 [Source:MGI Symbol;Acc:MGI:5142013]
Gm44863	67.388	0.675186	0.32677	2.06624	0.0388058	0.811717	52.0141	82.7619	1.59114	Not Sig	ENSMUSG00000109416	TEC	nonsignificant	predicted gene 44863 [Source:MGI Symbol;Acc:MGI:5753439]
Bnip3	1896.55	-0.180613	0.0874594	-2.06511	0.0389124	0.811717	2014.69	1778.41	0.882722	Not Sig	ENSMUSG00000078566	protein_coding	nonsignificant	BCL2/adenovirus E1B interacting protein 3 [Source:MGI Symbol;Acc:MGI:109326]
Gm44800	1235.06	0.779785	0.377451	2.06593	0.0388354	0.811717	909.055	1561.07	1.71724	Not Sig	ENSMUSG00000109418	TEC	nonsignificant	predicted gene 44800 [Source:MGI Symbol;Acc:MGI:5753376]
Gm45877	26.8812	1.0122	0.490088	2.06534	0.0388909	0.811717	17.7414	36.0209	2.03032	Not Sig	ENSMUSG00000110486	lncRNA	nonsignificant	predicted gene 45877 [Source:MGI Symbol;Acc:MGI:5804992]
Mns1	213.83	0.431121	0.208972	2.06305	0.0391074	0.811717	181.961	245.699	1.35028	Not Sig	ENSMUSG00000032221	protein_coding	nonsignificant	meiosis-specific nuclear structural protein 1 [Source:MGI Symbol;Acc:MGI:107933]
Dnajc12	371.73	-0.305774	0.148165	-2.06374	0.0390425	0.811717	410.405	333.056	0.811531	Not Sig	ENSMUSG00000036764	protein_coding	nonsignificant	DnaJ heat shock protein family (Hsp40) member C12 [Source:MGI Symbol;Acc:MGI:1353428]
Gm15941	180.779	0.421171	0.203965	2.06491	0.0389314	0.811717	154.507	207.052	1.34009	Not Sig	ENSMUSG00000086992	lncRNA	nonsignificant	predicted gene 15941 [Source:MGI Symbol;Acc:MGI:3802081]
Cerk	3565.87	-0.197883	0.0959001	-2.06343	0.0390721	0.811717	3811.6	3320.15	0.871064	Not Sig	ENSMUSG00000035891	protein_coding	nonsignificant	ceramide kinase [Source:MGI Symbol;Acc:MGI:2386052]
Zfp185	207.113	0.558815	0.270702	2.06432	0.0389875	0.811717	167.432	246.795	1.47401	Not Sig	ENSMUSG00000031351	protein_coding	nonsignificant	zinc finger protein 185 [Source:MGI Symbol;Acc:MGI:108095]
Zcchc18	10239.3	-0.14854	0.0719404	-2.06477	0.038945	0.811717	10767.2	9711.42	0.901943	Not Sig	ENSMUSG00000031428	protein_coding	nonsignificant	zinc finger, CCHC domain containing 18 [Source:MGI Symbol;Acc:MGI:1914245]
Gm16041	227.299	0.431664	0.209382	2.06161	0.0392448	0.811878	193.178	261.42	1.35326	Not Sig	ENSMUSG00000085623	lncRNA	nonsignificant	predicted gene 16041 [Source:MGI Symbol;Acc:MGI:3801909]
Tnnt2	106.701	-0.6544	0.317631	-2.06025	0.0393743	0.811878	129.812	83.5889	0.643922	Not Sig	ENSMUSG00000026414	protein_coding	nonsignificant	troponin T2, cardiac [Source:MGI Symbol;Acc:MGI:104597]
Bpifb4	2.05237	-4.30829	2.0915	-2.05991	0.0394076	0.811878	4.10474	0	0	Not Sig	ENSMUSG00000074665	protein_coding	nonsignificant	BPI fold containing family B, member 4 [Source:MGI Symbol;Acc:MGI:2685852]
Qrfpr	46.6122	-0.811258	0.39387	-2.05971	0.0394263	0.811878	59.2214	34.003	0.574167	Not Sig	ENSMUSG00000058400	protein_coding	nonsignificant	pyroglutamylated RFamide peptide receptor [Source:MGI Symbol;Acc:MGI:2677633]
Tmem132b	15256.1	-0.130795	0.0634798	-2.06042	0.039358	0.811878	15947.7	14564.5	0.913266	Not Sig	ENSMUSG00000070498	protein_coding	nonsignificant	transmembrane protein 132B [Source:MGI Symbol;Acc:MGI:3609245]
Gm43188	481.169	0.852145	0.413169	2.06246	0.039164	0.811878	342.993	619.344	1.8057	Not Sig	ENSMUSG00000106384	TEC	nonsignificant	predicted gene 43188 [Source:MGI Symbol;Acc:MGI:5663325]
Gm38082	146.334	0.513577	0.249324	2.05988	0.03941	0.811878	120.28	172.388	1.43322	Not Sig	ENSMUSG00000104369	TEC	nonsignificant	predicted gene, 38082 [Source:MGI Symbol;Acc:MGI:5611310]
Gm43963	47.5595	0.772648	0.374832	2.06132	0.0392728	0.811878	35.0458	60.0732	1.71413	Not Sig	ENSMUSG00000107846	TEC	nonsignificant	predicted gene, 43963 [Source:MGI Symbol;Acc:MGI:5690355]
Tecr	8220.75	-0.154236	0.0747942	-2.06213	0.039195	0.811878	8661.06	7780.44	0.898324	Not Sig	ENSMUSG00000031708	protein_coding	nonsignificant	trans-2,3-enoyl-CoA reductase [Source:MGI Symbol;Acc:MGI:1915408]
Fyco1	4807.7	0.167106	0.0810688	2.06128	0.0392759	0.811878	4527.79	5087.62	1.12364	Not Sig	ENSMUSG00000025241	protein_coding	nonsignificant	FYVE and coiled-coil domain containing 1 [Source:MGI Symbol;Acc:MGI:107277]
Phf12	3090.61	-0.154107	0.0747308	-2.06217	0.0391919	0.811878	3255.21	2926.02	0.898874	Not Sig	ENSMUSG00000037791	protein_coding	nonsignificant	PHD finger protein 12 [Source:MGI Symbol;Acc:MGI:1924057]
Acot1	439.898	0.282342	0.137065	2.05991	0.039407	0.811878	397.449	482.348	1.21361	Not Sig	ENSMUSG00000072949	protein_coding	nonsignificant	acyl-CoA thioesterase 1 [Source:MGI Symbol;Acc:MGI:1349396]
Gm49179	71.7642	0.652663	0.316766	2.06039	0.0393609	0.811878	55.5879	87.9406	1.58201	Not Sig	ENSMUSG00000115718	lncRNA	nonsignificant	predicted gene, 49179 [Source:MGI Symbol;Acc:MGI:6118614]
Gm49526	723.54	0.343062	0.166431	2.06129	0.0392755	0.811878	637.418	809.663	1.27022	Not Sig	ENSMUSG00000115975	TEC	nonsignificant	predicted gene, 49526 [Source:MGI Symbol;Acc:MGI:6155225]
Mir8095	40.1357	0.817338	0.396724	2.06022	0.0393776	0.811878	29.0097	51.2617	1.76706	Not Sig	ENSMUSG00000099071	miRNA	nonsignificant	microRNA 8095 [Source:MGI Symbol;Acc:MGI:5530948]
Gm14387	105.856	0.537089	0.260819	2.05924	0.0394713	0.811952	86.1651	125.547	1.45705	Not Sig	ENSMUSG00000080888	unprocessed_pseudogene	nonsignificant	predicted gene 14387 [Source:MGI Symbol;Acc:MGI:3650318]
Bach2it1	31.2006	1.04652	0.508206	2.05924	0.0394712	0.811952	20.2748	42.1263	2.07777	Not Sig	ENSMUSG00000087049	lncRNA	nonsignificant	BTB and CNC homology 2, intronic transcript 1 [Source:MGI Symbol;Acc:MGI:3651084]
Lurap1	1738.15	-0.17732	0.0861654	-2.05791	0.0395989	0.812503	1845.16	1631.14	0.884007	Not Sig	ENSMUSG00000028701	protein_coding	nonsignificant	leucine rich adaptor protein 1 [Source:MGI Symbol;Acc:MGI:1915325]
Mast1	3444.11	-0.165866	0.0805813	-2.05837	0.039555	0.812503	3640.9	3247.32	0.891901	Not Sig	ENSMUSG00000053693	protein_coding	nonsignificant	microtubule associated serine/threonine kinase 1 [Source:MGI Symbol;Acc:MGI:1861901]
Plscr1	70.06	-0.67706	0.328953	-2.05823	0.0395681	0.812503	86.1489	53.9711	0.626487	Not Sig	ENSMUSG00000032369	protein_coding	nonsignificant	phospholipid scramblase 1 [Source:MGI Symbol;Acc:MGI:893575]
Plekhj1	646.472	-0.249211	0.121101	-2.05788	0.0396019	0.812503	702.667	590.278	0.840055	Not Sig	ENSMUSG00000035278	protein_coding	nonsignificant	pleckstrin homology domain containing, family J member 1 [Source:MGI Symbol;Acc:MGI:1925920]
Gm50068	9.57012	1.71547	0.833298	2.05865	0.0395279	0.812503	4.45943	14.6808	3.29209	Not Sig	ENSMUSG00000117614	lncRNA	nonsignificant	predicted gene, 50068 [Source:MGI Symbol;Acc:MGI:6275391]
Cask	7349.27	-0.136335	0.0662577	-2.05764	0.0396244	0.812538	7695.8	7002.74	0.909943	Not Sig	ENSMUSG00000031012	protein_coding	nonsignificant	calcium/calmodulin dependent serine protein kinase [Source:MGI Symbol;Acc:MGI:1309489]
Gm16105	47.169	0.850252	0.413263	2.05741	0.0396469	0.812575	33.7458	60.5922	1.79555	Not Sig	ENSMUSG00000084849	lncRNA	nonsignificant	predicted gene 16105 [Source:MGI Symbol;Acc:MGI:3801737]
Gm8173	94.7185	0.646019	0.314219	2.05595	0.0397871	0.81296	73.4031	116.034	1.58078	Not Sig	ENSMUSG00000100555	processed_pseudogene	nonsignificant	predicted gene 8173 [Source:MGI Symbol;Acc:MGI:3648321]
Dnai4	1099.96	0.303176	0.147454	2.05608	0.0397752	0.81296	985.144	1214.78	1.2331	Not Sig	ENSMUSG00000035126	protein_coding	nonsignificant	dynein axonemal intermediate chain 4 [Source:MGI Symbol;Acc:MGI:2385328]
Spx	70.4134	0.843991	0.410411	2.05646	0.0397386	0.81296	50.3832	90.4436	1.79511	Not Sig	ENSMUSG00000071112	protein_coding	nonsignificant	spexin hormone [Source:MGI Symbol;Acc:MGI:2442262]
Gm28729	30.8796	1.02643	0.499255	2.05592	0.0397903	0.81296	20.3634	41.3958	2.03285	Not Sig	ENSMUSG00000099564	protein_coding	nonsignificant	predicted gene 28729 [Source:MGI Symbol;Acc:MGI:5579435]
Slc8a1	61066.5	-0.137904	0.0670673	-2.0562	0.0397629	0.81296	63983.6	58149.5	0.908819	Not Sig	ENSMUSG00000054640	protein_coding	nonsignificant	solute carrier family 8 (sodium/calcium exchanger), member 1 [Source:MGI Symbol;Acc:MGI:107956]
Nrap	21.4457	-1.14323	0.555879	-2.05661	0.039724	0.81296	29.5594	13.3319	0.45102	Not Sig	ENSMUSG00000049134	protein_coding	nonsignificant	nebulin-related anchoring protein [Source:MGI Symbol;Acc:MGI:1098765]
Tmem44	2766.42	-0.211076	0.10268	-2.05566	0.0398149	0.813038	2967.9	2564.95	0.86423	Not Sig	ENSMUSG00000022537	protein_coding	nonsignificant	transmembrane protein 44 [Source:MGI Symbol;Acc:MGI:1924489]
Gm45174	303.518	0.416606	0.202752	2.05476	0.0399024	0.8144	259.751	347.285	1.33699	Not Sig	ENSMUSG00000109422	TEC	nonsignificant	predicted gene 45174 [Source:MGI Symbol;Acc:MGI:5753750]
Gm8185	84.2056	0.652844	0.317757	2.05454	0.0399234	0.814404	65.2064	103.205	1.58274	Not Sig	ENSMUSG00000090119	processed_pseudogene	nonsignificant	predicted gene 8185 [Source:MGI Symbol;Acc:MGI:3643116]
Gm13841	8.58381	1.82478	0.888579	2.0536	0.0400147	0.814993	3.81542	13.3522	3.49954	Not Sig	ENSMUSG00000083833	processed_pseudogene	nonsignificant	predicted gene 13841 [Source:MGI Symbol;Acc:MGI:3650890]
Cav2	1915.8	-0.168094	0.0818519	-2.05364	0.0400106	0.814993	2027.49	1804.1	0.889824	Not Sig	ENSMUSG00000000058	protein_coding	nonsignificant	caveolin 2 [Source:MGI Symbol;Acc:MGI:107571]
Gm44847	912.968	0.349518	0.170177	2.05385	0.0399898	0.814993	802.203	1023.73	1.27615	Not Sig	ENSMUSG00000108890	TEC	nonsignificant	predicted gene 44847 [Source:MGI Symbol;Acc:MGI:5753423]
Gm9504	10.9119	1.78559	0.870266	2.05177	0.0401919	0.815613	4.83085	16.993	3.51759	Not Sig	ENSMUSG00000105277	processed_pseudogene	nonsignificant	predicted gene 9504 [Source:MGI Symbol;Acc:MGI:3779914]
Gm42303	193.215	0.423624	0.206488	2.05157	0.0402118	0.815613	164.721	221.709	1.34596	Not Sig	ENSMUSG00000110373	lncRNA	nonsignificant	predicted gene, 42303 [Source:MGI Symbol;Acc:MGI:5625188]
Pitpnm2os2	182.853	0.413576	0.201517	2.05231	0.0401391	0.815613	156.44	209.266	1.33768	Not Sig	ENSMUSG00000089842	lncRNA	nonsignificant	phosphatidylinositol transfer protein, membrane-associated 2, opposite strand 2 [Source:MGI Symbol;Acc:MGI:3840147]
Gm1698	12.2038	1.60505	0.782341	2.0516	0.040209	0.815613	5.98465	18.423	3.07837	Not Sig	ENSMUSG00000074404	lncRNA	nonsignificant	predicted gene 1698 [Source:MGI Symbol;Acc:MGI:2686544]
Tcf25	21541.1	-0.13832	0.0674018	-2.05217	0.040153	0.815613	22573.6	20508.6	0.908519	Not Sig	ENSMUSG00000001472	protein_coding	nonsignificant	transcription factor 25 (basic helix-loop-helix) [Source:MGI Symbol;Acc:MGI:1914105]
4930553I21Rik	18.2915	1.50552	0.733799	2.05167	0.0402014	0.815613	9.57673	27.0062	2.81998	Not Sig	ENSMUSG00000111165	TEC	nonsignificant	RIKEN cDNA 4930553I21 gene [Source:MGI Symbol;Acc:MGI:1922603]
Gm49700	102.344	-0.523303	0.255042	-2.05183	0.0401859	0.815613	120.91	83.7774	0.692891	Not Sig	ENSMUSG00000116883	lncRNA	nonsignificant	predicted gene, 49700 [Source:MGI Symbol;Acc:MGI:6215158]
Gm8784	6.75946	-2.37141	1.15566	-2.052	0.0401695	0.815613	11.3364	2.18249	0.19252	Not Sig	ENSMUSG00000113936	processed_pseudogene	nonsignificant	predicted gene 8784 [Source:MGI Symbol;Acc:MGI:3646031]
Mdk-ps1	8.75102	2.05495	1.00198	2.05089	0.0402776	0.816407	3.31887	14.1832	4.27349	Not Sig	ENSMUSG00000081677	processed_pseudogene	nonsignificant	midkine pseudogene 1 [Source:MGI Symbol;Acc:MGI:103029]
Gm31517	3.94602	2.97674	1.45155	2.05074	0.0402927	0.816407	0.889175	7.00287	7.8757	Not Sig	ENSMUSG00000114538	lncRNA	nonsignificant	predicted gene, 31517 [Source:MGI Symbol;Acc:MGI:5590676]
Crbn	3809.11	-0.162461	0.0792311	-2.05047	0.0403188	0.816512	4024.86	3593.35	0.892789	Not Sig	ENSMUSG00000005362	protein_coding	nonsignificant	cereblon [Source:MGI Symbol;Acc:MGI:1913277]
Retreg2	5203.78	-0.170378	0.0831282	-2.04958	0.040405	0.817413	5511.83	4895.73	0.888222	Not Sig	ENSMUSG00000049339	protein_coding	nonsignificant	reticulophagy regulator family member 2 [Source:MGI Symbol;Acc:MGI:2388278]
Gm6288	16.184	1.29144	0.630092	2.0496	0.0404037	0.817413	9.32679	23.0411	2.47043	Not Sig	ENSMUSG00000072660	lncRNA	nonsignificant	predicted gene 6288 [Source:MGI Symbol;Acc:MGI:3646376]
[truncated: 37,211 more rows]

## Sheet: Illumina GOdown
ID	Description	GeneRatio	BgRatio	pvalue	p.adjust	qvalue	geneID	Count	gene_ratio	GO_term
[truncated: 1,405 more rows]

## Sheet: Illumina GOup
ID	Description	GeneRatio	BgRatio	pvalue	p.adjust	qvalue	geneID	Count	gene_ratio	GO_term
[truncated: 555 more rows]

## Sheet: Illumina APAraw
gene_symbol	KO1_areads	KO1_aRPKM	KO1_creads	KO1_cRPKM	KO1_3UTR_RE	KO2_areads	KO2_aRPKM	KO2_creads	KO2_cRPKM	KO2_3UTR_RE	KO3_areads	KO3_aRPKM	KO3_creads	KO3_cRPKM	KO3_3UTR_RE	WT1_areads	WT1_aRPKM	WT1_creads	WT1_cRPKM	WT1_3UTR_RE	WT2_areads	WT2_aRPKM	WT2_creads	WT2_cRPKM	WT2_3UTR_RE	WT3_areads	WT3_aRPKM	WT3_creads	WT3_cRPKM	WT3_3UTR_RE
[truncated: 11,735 more rows]

[truncated: 6 more sheets: Illumina DiffAPA, Illumina IPAraw, Illumina DiffIPA, DRS DiffAdenyl transcript, DRS DiffAdenyl gene, DRS DiffExp]
