# Supplementary material
Source: HighWire-hosted journal article supplement (doi:10.1101/rna.080240.124)
Supplement: Supplemental_Table4.xlsx [file Supplemental_Table4.xlsx]

## Sheet: Info
Supplementary Data 5
This file contains the results summary of correlation analysis between monoA-tailed isomiRs and their targer mRNA expression levels under Tent2 KO in mouse hippocampus.
It contain four tables:
Table 1. Interaction list - list of all identified interactions between miRNAs with monA-tailed isoform and targeted genes.
Table 2. Expression summary - table with log2 fold changes nad adjuste P-values calculated for gene, canonical isomiR and monA-tailed isomiR summarised per rows according to their interactions. The analysis was performed in DESeq 2 R package.
Table 3.Pearson correlation - results of Pearson correlation analysis of monaA-tailed isomiR and targeted significantly differentially expressed mRNA expression levels
Table 4. Gene annotation - results of annotation genes to potential biological process based on GO enrichment ad reduction of GO terms based on their sematic

## Sheet: Interaction list
monaA-tailed isomiRs expression correlation with target mRNA expression under Tent2 KO in mice hippocampus
Table 1. List of identified interactions between miRNAs with monA-tailed isoform and targeted genes
MIRNA	Ensembl Gene ID	Gene Name
mmu-miR-139-3p	ENSMUSG00000031828	Klhl36
mmu-miR-673-5p	ENSMUSG00000031827	Cotl1
mmu-miR-151-5p	ENSMUSG00000031827	Cotl1
mmu-miR-532-5p	ENSMUSG00000023336	Wfdc1
mmu-miR-338-3p	ENSMUSG00000023336	Wfdc1
mmu-miR-423-3p	ENSMUSG00000045246	Kcng4
mmu-miR-423-3p	ENSMUSG00000031832	Taf1c
mmu-miR-139-3p	ENSMUSG00000031832	Taf1c
mmu-miR-139-5p	ENSMUSG00000031832	Taf1c
mmu-miR-338-3p	ENSMUSG00000031832	Taf1c
mmu-miR-671-3p	ENSMUSG00000024266	Adad2
mmu-miR-296-5p	ENSMUSG00000024266	Adad2
mmu-miR-139-5p	ENSMUSG00000031831	Dnaaf1
mmu-miR-671-5p	ENSMUSG00000034189	Hsdl1
mmu-miR-139-3p	ENSMUSG00000031835	Mbtps1
mmu-miR-139-5p	ENSMUSG00000034224	Slc38a8
mmu-miR-666-3p	ENSMUSG00000034224	Slc38a8
mmu-miR-673-5p	ENSMUSG00000031837	Necab2
mmu-miR-423-5p	ENSMUSG00000031837	Necab2
mmu-miR-532-5p	ENSMUSG00000074063	Osgin1
mmu-miR-338-3p	ENSMUSG00000074063	Osgin1
mmu-miR-331-3p	ENSMUSG00000074063	Osgin1
mmu-miR-296-5p	ENSMUSG00000074063	Osgin1
mmu-miR-673-5p	ENSMUSG00000031843	Mphosph6
mmu-miR-188-5p	ENSMUSG00000031843	Mphosph6
mmu-miR-331-3p	ENSMUSG00000031843	Mphosph6
mmu-miR-574-3p	ENSMUSG00000034330	Plcg2
mmu-miR-423-3p	ENSMUSG00000034330	Plcg2
mmu-miR-337-5p	ENSMUSG00000034330	Plcg2
mmu-miR-34b-3p	ENSMUSG00000034390	Cmip
mmu-miR-139-3p	ENSMUSG00000034390	Cmip
mmu-miR-574-3p	ENSMUSG00000052557	Gan
mmu-miR-673-5p	ENSMUSG00000052557	Gan
mmu-miR-139-5p	ENSMUSG00000052557	Gan
mmu-miR-501-3p	ENSMUSG00000052557	Gan
mmu-miR-532-5p	ENSMUSG00000031845	Bco1
mmu-miR-673-5p	ENSMUSG00000034424	Gcsh
mmu-miR-369-5p	ENSMUSG00000034424	Gcsh
mmu-miR-673-5p	ENSMUSG00000031756	Cenpn
mmu-miR-151-5p	ENSMUSG00000014633	Cmc2
mmu-miR-337-5p	ENSMUSG00000055435	Maf
mmu-miR-369-5p	ENSMUSG00000008874	Clec3a
mmu-miR-574-3p	ENSMUSG00000031767	Nudt7
mmu-miR-673-5p	ENSMUSG00000031767	Nudt7
mmu-miR-342-3p	ENSMUSG00000031767	Nudt7
mmu-miR-151-5p	ENSMUSG00000031767	Nudt7
mmu-miR-139-3p	ENSMUSG00000078908	Mon1b
mmu-miR-409-5p	ENSMUSG00000078908	Mon1b
mmu-miR-666-3p	ENSMUSG00000031772	Cntnap4
mmu-miR-337-5p	ENSMUSG00000031948	Kars1
mmu-miR-369-5p	ENSMUSG00000031948	Kars1
mmu-miR-342-3p	ENSMUSG00000031948	Kars1
mmu-miR-423-3p	ENSMUSG00000031950	Gabarapl2
mmu-miR-409-5p	ENSMUSG00000031951	Tmem231
mmu-miR-423-5p	ENSMUSG00000031952	Chst5
mmu-miR-532-5p	ENSMUSG00000031953	Tmem170
mmu-miR-34b-3p	ENSMUSG00000031954	Cfdp1
mmu-miR-151-5p	ENSMUSG00000031954	Cfdp1
mmu-miR-501-3p	ENSMUSG00000033545	Znrf1
mmu-miR-342-3p	ENSMUSG00000033579	Fa2h
mmu-miR-671-5p	ENSMUSG00000033579	Fa2h
mmu-miR-532-5p	ENSMUSG00000012519	Mlkl
mmu-miR-338-3p	ENSMUSG00000012519	Mlkl
mmu-miR-139-5p	ENSMUSG00000033633	Clec18a
mmu-miR-666-3p	ENSMUSG00000033633	Clec18a
mmu-miR-139-3p	ENSMUSG00000031749	St3gal2
mmu-miR-151-3p	ENSMUSG00000033703	Fcsk
mmu-miR-666-3p	ENSMUSG00000033703	Fcsk
mmu-miR-423-3p	ENSMUSG00000031750	Il34
mmu-miR-188-5p	ENSMUSG00000031750	Il34
mmu-miR-409-5p	ENSMUSG00000031750	Il34
mmu-miR-331-3p	ENSMUSG00000031750	Il34
mmu-miR-671-5p	ENSMUSG00000031750	Il34
mmu-miR-501-3p	ENSMUSG00000010936	Vac14
mmu-miR-342-3p	ENSMUSG00000053062	Jam2
mmu-miR-409-5p	ENSMUSG00000059854	Hydin
mmu-miR-139-3p	ENSMUSG00000003657	Calb2
mmu-miR-671-5p	ENSMUSG00000003657	Calb2
mmu-miR-151-5p	ENSMUSG00000003657	Calb2
mmu-miR-673-5p	ENSMUSG00000001672	Marveld3
mmu-miR-671-3p	ENSMUSG00000001672	Marveld3
mmu-miR-369-5p	ENSMUSG00000031732	Phlpp2
mmu-miR-673-5p	ENSMUSG00000031728	Zfp821
mmu-miR-139-5p	ENSMUSG00000031728	Zfp821
mmu-miR-151-3p	ENSMUSG00000031728	Zfp821
mmu-miR-296-5p	ENSMUSG00000031728	Zfp821
mmu-miR-666-3p	ENSMUSG00000031728	Zfp821
mmu-miR-666-3p	ENSMUSG00000048827	Pkd1l3
mmu-miR-574-3p	ENSMUSG00000031723	Txnl4b
mmu-miR-337-5p	ENSMUSG00000031723	Txnl4b
mmu-miR-296-5p	ENSMUSG00000031723	Txnl4b
mmu-miR-139-3p	ENSMUSG00000037993	Dhx38
mmu-miR-331-3p	ENSMUSG00000037993	Dhx38
mmu-miR-188-5p	ENSMUSG00000039067	Psmd7
mmu-miR-369-3p	ENSMUSG00000039067	Psmd7
mmu-miR-337-5p	ENSMUSG00000003848	Nob1
mmu-miR-188-5p	ENSMUSG00000003848	Nob1
mmu-miR-151-5p	ENSMUSG00000003848	Nob1
mmu-miR-666-3p	ENSMUSG00000003848	Nob1
mmu-miR-331-3p	ENSMUSG00000003849	Nqo1
mmu-miR-337-5p	ENSMUSG00000003847	Nfat5
mmu-miR-409-5p	ENSMUSG00000033557	Fam20b
mmu-miR-151-5p	ENSMUSG00000033557	Fam20b
mmu-miR-666-3p	ENSMUSG00000033557	Fam20b
mmu-miR-673-5p	ENSMUSG00000031921	Terf2
mmu-miR-338-3p	ENSMUSG00000031921	Terf2
mmu-miR-532-5p	ENSMUSG00000031919	Tmed6
mmu-miR-574-3p	ENSMUSG00000031917	Nip7
mmu-miR-342-3p	ENSMUSG00000031917	Nip7
mmu-miR-671-3p	ENSMUSG00000031916	Cog8
mmu-miR-139-3p	ENSMUSG00000031913	Vps4a
mmu-miR-423-5p	ENSMUSG00000031913	Vps4a
mmu-miR-337-5p	ENSMUSG00000031913	Vps4a
mmu-miR-151-5p	ENSMUSG00000031913	Vps4a
mmu-miR-296-5p	ENSMUSG00000031913	Vps4a
mmu-miR-151-5p	ENSMUSG00000031910	Has3
mmu-miR-501-3p	ENSMUSG00000041949	Tango6
mmu-miR-409-5p	ENSMUSG00000000303	Cdh1
mmu-miR-423-3p	ENSMUSG00000031903	Pla2g15
mmu-miR-423-5p	ENSMUSG00000031903	Pla2g15
mmu-miR-409-5p	ENSMUSG00000031903	Pla2g15
mmu-miR-338-3p	ENSMUSG00000031903	Pla2g15
mmu-miR-574-3p	ENSMUSG00000031901	Dus2
mmu-miR-188-5p	ENSMUSG00000031901	Dus2
mmu-miR-331-3p	ENSMUSG00000031901	Dus2
mmu-miR-342-3p	ENSMUSG00000031901	Dus2
mmu-miR-151-3p	ENSMUSG00000031901	Dus2
mmu-miR-139-3p	ENSMUSG00000017765	Slc12a4
mmu-miR-331-3p	ENSMUSG00000017765	Slc12a4
mmu-miR-671-5p	ENSMUSG00000035237	Lcat
mmu-miR-532-5p	ENSMUSG00000044287	Nrn1l
mmu-miR-666-3p	ENSMUSG00000044287	Nrn1l
mmu-miR-532-5p	ENSMUSG00000036270	Edc4
mmu-miR-409-5p	ENSMUSG00000036270	Edc4
mmu-miR-331-3p	ENSMUSG00000036270	Edc4
mmu-miR-34b-3p	ENSMUSG00000036442	Thap11
mmu-miR-409-5p	ENSMUSG00000036442	Thap11
mmu-miR-501-3p	ENSMUSG00000036672	Cenpt
mmu-miR-423-3p	ENSMUSG00000013150	Gfod2
mmu-miR-139-5p	ENSMUSG00000013150	Gfod2
mmu-miR-369-3p	ENSMUSG00000013150	Gfod2
mmu-miR-151-3p	ENSMUSG00000013158	4933405L10Rik
mmu-miR-331-3p	ENSMUSG00000013155	Enkd1
mmu-miR-151-3p	ENSMUSG00000005699	Pard6a
mmu-miR-666-3p	ENSMUSG00000038000	Acd
mmu-miR-151-3p	ENSMUSG00000005698	Ctcf
mmu-miR-188-5p	ENSMUSG00000005705	Agrp
mmu-miR-423-5p	ENSMUSG00000013160	Atp6v0d1
mmu-miR-151-3p	ENSMUSG00000031891	Hsd11b2
mmu-miR-151-5p	ENSMUSG00000031891	Hsd11b2
mmu-miR-666-3p	ENSMUSG00000031891	Hsd11b2
mmu-miR-331-3p	ENSMUSG00000014846	Tppp3
mmu-miR-673-5p	ENSMUSG00000039199	Zdhhc1
mmu-miR-369-3p	ENSMUSG00000054320	Lrrc36
mmu-miR-151-3p	ENSMUSG00000051648	Kctd19
mmu-miR-574-3p	ENSMUSG00000014786	Slc9a5
mmu-miR-34b-3p	ENSMUSG00000014782	Plekhg4
mmu-miR-342-3p	ENSMUSG00000014778	Fhod1
mmu-miR-338-3p	ENSMUSG00000041679	Fbxl9
mmu-miR-296-5p	ENSMUSG00000041679	Fbxl9
mmu-miR-423-5p	ENSMUSG00000014859	E2f4
mmu-miR-666-3p	ENSMUSG00000014859	E2f4
mmu-miR-574-3p	ENSMUSG00000043251	Exoc3l
mmu-miR-331-3p	ENSMUSG00000043251	Exoc3l
mmu-miR-342-3p	ENSMUSG00000043251	Exoc3l
mmu-miR-139-5p	ENSMUSG00000014837	Matcap1
mmu-miR-296-5p	ENSMUSG00000014837	Matcap1
mmu-miR-423-5p	ENSMUSG00000033249	Hsf4
mmu-miR-671-5p	ENSMUSG00000033249	Hsf4
mmu-miR-574-3p	ENSMUSG00000014776	Nol3
mmu-miR-673-5p	ENSMUSG00000014776	Nol3
mmu-miR-574-3p	ENSMUSG00000033313	Fbxl8
mmu-miR-673-5p	ENSMUSG00000033313	Fbxl8
mmu-miR-671-3p	ENSMUSG00000033313	Fbxl8
mmu-miR-139-3p	ENSMUSG00000031889	Phaf1
mmu-miR-673-5p	ENSMUSG00000062181	Ces3b
mmu-miR-337-5p	ENSMUSG00000062181	Ces3b
mmu-miR-673-5p	ENSMUSG00000069922	Ces3a
mmu-miR-337-5p	ENSMUSG00000069922	Ces3a
mmu-miR-342-3p	ENSMUSG00000050097	Ces2b
mmu-miR-369-3p	ENSMUSG00000055730	Ces2a
mmu-miR-342-3p	ENSMUSG00000055730	Ces2a
mmu-miR-369-5p	ENSMUSG00000023737	1700082M22Rik
mmu-miR-337-5p	ENSMUSG00000031880	Rrad
mmu-miR-342-3p	ENSMUSG00000048371	Pdp2
mmu-miR-671-5p	ENSMUSG00000031883	Car7
mmu-miR-342-3p	ENSMUSG00000052616	Terb1
mmu-miR-666-3p	ENSMUSG00000035785	Cmtm2b
mmu-miR-331-3p	ENSMUSG00000074127	Cmtm2a
mmu-miR-666-3p	ENSMUSG00000054400	Cklf
mmu-miR-673-5p	ENSMUSG00000054400	Cklf
mmu-miR-671-5p	ENSMUSG00000035824	Tk2
mmu-miR-188-5p	ENSMUSG00000036510	Cdh8
mmu-miR-574-3p	ENSMUSG00000031672	Got2
mmu-miR-673-5p	ENSMUSG00000036550	Cnot1
mmu-miR-369-5p	ENSMUSG00000036550	Cnot1
mmu-miR-671-3p	ENSMUSG00000031671	Setd6
mmu-miR-671-5p	ENSMUSG00000031671	Setd6
mmu-miR-331-3p	ENSMUSG00000048400	Prss54
mmu-miR-342-3p	ENSMUSG00000031796	Cfap20
mmu-miR-671-3p	ENSMUSG00000046707	Csnk2a2
mmu-miR-671-5p	ENSMUSG00000046707	Csnk2a2
mmu-miR-342-3p	ENSMUSG00000031789	Cngb1
mmu-miR-673-5p	ENSMUSG00000060470	Adgrg3
mmu-miR-671-3p	ENSMUSG00000060470	Adgrg3
mmu-miR-34b-3p	ENSMUSG00000063605	Ccdc102a
mmu-miR-331-3p	ENSMUSG00000063605	Ccdc102a
mmu-miR-532-5p	ENSMUSG00000061577	Adgrg5
mmu-miR-331-3p	ENSMUSG00000061577	Adgrg5
mmu-miR-338-3p	ENSMUSG00000040631	Dok4
mmu-miR-337-5p	ENSMUSG00000031782	Coq9
mmu-miR-338-3p	ENSMUSG00000050079	Rspry1
mmu-miR-139-3p	ENSMUSG00000034361	Cpne2
mmu-miR-671-5p	ENSMUSG00000034361	Cpne2
mmu-miR-139-3p	ENSMUSG00000032939	Nup93
mmu-miR-671-3p	ENSMUSG00000031766	Slc12a3
mmu-miR-423-3p	ENSMUSG00000031765	Mt1
mmu-miR-139-3p	ENSMUSG00000031765	Mt1
mmu-miR-296-5p	ENSMUSG00000031762	Mt2
mmu-miR-673-5p	ENSMUSG00000031757	Mt4
mmu-miR-501-3p	ENSMUSG00000031757	Mt4
mmu-miR-34b-3p	ENSMUSG00000031755	Bbs2
mmu-miR-501-3p	ENSMUSG00000031751	Amfr
mmu-miR-369-3p	ENSMUSG00000057074	Ces1g
mmu-miR-331-3p	ENSMUSG00000031725	Ces1f
mmu-miR-369-3p	ENSMUSG00000056973	Ces1d
mmu-miR-337-5p	ENSMUSG00000071047	Ces1a
mmu-miR-34b-3p	ENSMUSG00000031740	Mmp2
mmu-miR-671-5p	ENSMUSG00000031740	Mmp2
mmu-miR-139-5p	ENSMUSG00000031736	Crnde
mmu-miR-369-3p	ENSMUSG00000031734	Irx3
mmu-miR-151-5p	ENSMUSG00000031734	Irx3
mmu-miR-671-5p	ENSMUSG00000055932	Fto
mmu-miR-423-3p	ENSMUSG00000074171	Gm6658
mmu-miR-369-3p	ENSMUSG00000069962	Gm5356
mmu-miR-369-3p	ENSMUSG00000063875	Rps6-ps1
mmu-miR-139-3p	ENSMUSG00000055994	Nod2
mmu-miR-296-5p	ENSMUSG00000031662	Snx20
mmu-miR-369-3p	ENSMUSG00000031660	Brd7
mmu-miR-532-5p	ENSMUSG00000062704	9430002A10Rik
mmu-miR-369-3p	ENSMUSG00000062704	9430002A10Rik
mmu-miR-369-5p	ENSMUSG00000062704	9430002A10Rik
mmu-miR-369-5p	ENSMUSG00000036779	Tent4b
mmu-miR-338-3p	ENSMUSG00000036810	Cnep1r1
mmu-miR-188-5p	ENSMUSG00000045333	Zfp423
mmu-miR-423-5p	ENSMUSG00000036872	Abcc12
mmu-miR-671-3p	ENSMUSG00000036872	Abcc12
mmu-miR-34b-3p	ENSMUSG00000036879	Phkb
mmu-miR-34b-3p	ENSMUSG00000031703	Itfg1
mmu-miR-501-3p	ENSMUSG00000031703	Itfg1
mmu-miR-151-5p	ENSMUSG00000031703	Itfg1
mmu-miR-574-3p	ENSMUSG00000031701	Dnaja2
mmu-miR-423-3p	ENSMUSG00000031697	Orc6
mmu-miR-151-3p	ENSMUSG00000031697	Orc6
mmu-miR-337-5p	ENSMUSG00000031698	Mylk3
mmu-miR-34b-3p	ENSMUSG00000031696	Vps35
mmu-miR-423-5p	ENSMUSG00000005142	Man2b1
mmu-miR-574-3p	ENSMUSG00000059355	Wdr83os
mmu-miR-296-5p	ENSMUSG00000059355	Wdr83os
mmu-miR-331-3p	ENSMUSG00000005150	Wdr83
mmu-miR-151-3p	ENSMUSG00000005150	Wdr83
mmu-miR-423-5p	ENSMUSG00000060038	Dhps
mmu-miR-671-5p	ENSMUSG00000060038	Dhps
mmu-miR-188-5p	ENSMUSG00000052456	Get3
mmu-miR-296-5p	ENSMUSG00000052456	Get3
mmu-miR-574-3p	ENSMUSG00000052566	Hook2
mmu-miR-423-5p	ENSMUSG00000052566	Hook2
mmu-miR-151-3p	ENSMUSG00000052566	Hook2
mmu-miR-151-5p	ENSMUSG00000052566	Hook2
mmu-miR-151-3p	ENSMUSG00000005161	Prdx2
mmu-miR-532-5p	ENSMUSG00000003812	Dnase2a
mmu-miR-409-5p	ENSMUSG00000003812	Dnase2a
mmu-miR-671-3p	ENSMUSG00000003812	Dnase2a
mmu-miR-151-3p	ENSMUSG00000003812	Dnase2a
mmu-miR-337-5p	ENSMUSG00000054191	Klf1
mmu-miR-369-5p	ENSMUSG00000054191	Klf1
mmu-miR-331-3p	ENSMUSG00000003809	Gcdh
mmu-miR-671-3p	ENSMUSG00000003809	Gcdh
mmu-miR-532-5p	ENSMUSG00000003824	Syce2
mmu-miR-342-3p	ENSMUSG00000003824	Syce2
mmu-miR-423-5p	ENSMUSG00000003808	Farsa
mmu-miR-501-3p	ENSMUSG00000003808	Farsa
mmu-miR-338-3p	ENSMUSG00000003808	Farsa
mmu-miR-296-5p	ENSMUSG00000033751	Gadd45gip1
mmu-miR-409-5p	ENSMUSG00000034041	Lyl1
mmu-miR-671-3p	ENSMUSG00000034041	Lyl1
mmu-miR-342-3p	ENSMUSG00000034041	Lyl1
mmu-miR-671-3p	ENSMUSG00000001909	Trmt1
mmu-miR-423-5p	ENSMUSG00000019362	D8Ertd738e
mmu-miR-337-5p	ENSMUSG00000019362	D8Ertd738e
mmu-miR-296-5p	ENSMUSG00000019362	D8Ertd738e
mmu-miR-139-5p	ENSMUSG00000056155	Nanos3
mmu-miR-338-3p	ENSMUSG00000056155	Nanos3
mmu-miR-423-3p	ENSMUSG00000008129	Brme1
mmu-miR-337-5p	ENSMUSG00000008129	Brme1
mmu-miR-666-3p	ENSMUSG00000008129	Brme1
mmu-miR-423-3p	ENSMUSG00000030069	Prok2
mmu-miR-337-5p	ENSMUSG00000030069	Prok2
mmu-miR-666-3p	ENSMUSG00000030069	Prok2
mmu-miR-423-5p	ENSMUSG00000036686	Cc2d1a
mmu-miR-331-3p	ENSMUSG00000036686	Cc2d1a
mmu-miR-671-5p	ENSMUSG00000036686	Cc2d1a
mmu-miR-409-5p	ENSMUSG00000037103	Dcaf15
mmu-miR-671-5p	ENSMUSG00000037103	Dcaf15
mmu-miR-34b-3p	ENSMUSG00000012889	Podnl1
mmu-miR-331-3p	ENSMUSG00000012889	Podnl1
mmu-miR-151-3p	ENSMUSG00000012889	Podnl1
mmu-miR-666-3p	ENSMUSG00000012889	Podnl1
mmu-miR-337-5p	ENSMUSG00000074215	Gm10643
mmu-miR-188-5p	ENSMUSG00000074215	Gm10643
mmu-miR-337-5p	ENSMUSG00000045232	Rln3
mmu-miR-671-3p	ENSMUSG00000045232	Rln3
mmu-miR-296-5p	ENSMUSG00000045232	Rln3
mmu-miR-671-3p	ENSMUSG00000047986	Palm3
mmu-miR-423-5p	ENSMUSG00000005465	Il27ra
mmu-miR-409-5p	ENSMUSG00000005465	Il27ra
mmu-miR-296-5p	ENSMUSG00000005469	Prkaca
mmu-miR-151-3p	ENSMUSG00000005470	Asf1b
mmu-miR-34b-3p	ENSMUSG00000013033	Adgrl1
mmu-miR-423-5p	ENSMUSG00000013033	Adgrl1
mmu-miR-501-3p	ENSMUSG00000013033	Adgrl1
mmu-miR-296-5p	ENSMUSG00000013033	Adgrl1
mmu-miR-331-3p	ENSMUSG00000074219	Gm10644
mmu-miR-501-3p	ENSMUSG00000002885	Adgre5
mmu-miR-188-5p	ENSMUSG00000002885	Adgre5
mmu-miR-34b-3p	ENSMUSG00000005481	Ddx39a
mmu-miR-532-5p	ENSMUSG00000019433	Gipc1
mmu-miR-671-5p	ENSMUSG00000019433	Gipc1
mmu-miR-673-5p	ENSMUSG00000005483	Dnajb1
mmu-miR-139-5p	ENSMUSG00000005483	Dnajb1
mmu-miR-331-3p	ENSMUSG00000005483	Dnajb1
mmu-miR-139-5p	ENSMUSG00000031708	Tecr
mmu-miR-673-5p	ENSMUSG00000047286	Or10k2
mmu-miR-671-5p	ENSMUSG00000047286	Or10k2
mmu-miR-342-3p	ENSMUSG00000063253	Scoc
mmu-miR-338-3p	ENSMUSG00000031710	Ucp1
mmu-miR-369-3p	ENSMUSG00000031709	Tbc1d9
mmu-miR-34b-3p	ENSMUSG00000031712	Il15
mmu-miR-369-5p	ENSMUSG00000031712	Il15
mmu-miR-188-5p	ENSMUSG00000031681	Smad1
mmu-miR-671-5p	ENSMUSG00000031682	1700011L22Rik
mmu-miR-369-3p	ENSMUSG00000071064	Zfp827
mmu-miR-574-3p	ENSMUSG00000031684	Slc10a7
mmu-miR-409-5p	ENSMUSG00000031684	Slc10a7
mmu-miR-574-3p	ENSMUSG00000031620	Iqcm
mmu-miR-673-5p	ENSMUSG00000005413	Hmox1
mmu-miR-188-5p	ENSMUSG00000005413	Hmox1
mmu-miR-342-3p	ENSMUSG00000005413	Hmox1
mmu-miR-666-3p	ENSMUSG00000005413	Hmox1
mmu-miR-666-3p	ENSMUSG00000042870	Tom1
mmu-miR-574-3p	ENSMUSG00000034518	Hmgxb4
mmu-miR-671-3p	ENSMUSG00000034518	Hmgxb4
mmu-miR-532-5p	ENSMUSG00000031621	Isx
mmu-miR-139-5p	ENSMUSG00000050147	F2rl3
mmu-miR-188-5p	ENSMUSG00000050147	F2rl3
mmu-miR-423-5p	ENSMUSG00000031622	Sin3b
mmu-miR-671-5p	ENSMUSG00000031622	Sin3b
mmu-miR-296-5p	ENSMUSG00000031622	Sin3b
mmu-miR-574-3p	ENSMUSG00000048148	Nwd1
mmu-miR-673-5p	ENSMUSG00000048148	Nwd1
mmu-miR-338-3p	ENSMUSG00000048148	Nwd1
mmu-miR-151-3p	ENSMUSG00000031791	Tmem38a
mmu-miR-139-3p	ENSMUSG00000044600	Smim7
mmu-miR-574-3p	ENSMUSG00000052488	Cherp
mmu-miR-671-3p	ENSMUSG00000055148	Klf2
mmu-miR-671-3p	ENSMUSG00000069996	Gm41341
mmu-miR-337-5p	ENSMUSG00000003039	Fam32a
mmu-miR-296-5p	ENSMUSG00000003037	Rab8a
mmu-miR-423-3p	ENSMUSG00000031799	Tpm4
mmu-miR-409-5p	ENSMUSG00000031799	Tpm4
mmu-miR-338-3p	ENSMUSG00000070000	Fcho1
mmu-miR-423-3p	ENSMUSG00000031803	B3gnt3
mmu-miR-151-3p	ENSMUSG00000079019	Insl3
mmu-miR-151-3p	ENSMUSG00000031805	Jak3
mmu-miR-671-5p	ENSMUSG00000031805	Jak3
mmu-miR-139-3p	ENSMUSG00000034799	Unc13a
mmu-miR-423-5p	ENSMUSG00000034799	Unc13a
mmu-miR-337-5p	ENSMUSG00000031807	Pgls
mmu-miR-673-5p	ENSMUSG00000031808	Slc27a1
mmu-miR-671-3p	ENSMUSG00000031808	Slc27a1
mmu-miR-296-5p	ENSMUSG00000031808	Slc27a1
mmu-miR-423-3p	ENSMUSG00000046718	Bst2
mmu-miR-331-3p	ENSMUSG00000046718	Bst2
mmu-miR-296-5p	ENSMUSG00000046718	Bst2
mmu-miR-501-3p	ENSMUSG00000031813	Mvb12a
mmu-miR-574-3p	ENSMUSG00000043664	Tmem221
mmu-miR-331-3p	ENSMUSG00000043664	Tmem221
mmu-miR-574-3p	ENSMUSG00000034845	Plvap
mmu-miR-673-5p	ENSMUSG00000034845	Plvap
mmu-miR-671-5p	ENSMUSG00000034845	Plvap
mmu-miR-673-5p	ENSMUSG00000007610	Gtpbp3
mmu-miR-666-3p	ENSMUSG00000007610	Gtpbp3
mmu-miR-532-5p	ENSMUSG00000007610	Gtpbp3
mmu-miR-423-3p	ENSMUSG00000034863	Ano8
mmu-miR-337-5p	ENSMUSG00000034863	Ano8
mmu-miR-331-3p	ENSMUSG00000034863	Ano8
mmu-miR-671-3p	ENSMUSG00000034863	Ano8
mmu-miR-296-5p	ENSMUSG00000034863	Ano8
mmu-miR-666-3p	ENSMUSG00000034863	Ano8
mmu-miR-139-3p	ENSMUSG00000034880	Mrpl34
mmu-miR-532-5p	ENSMUSG00000034880	Mrpl34
mmu-miR-423-3p	ENSMUSG00000074247	Dda1
mmu-miR-423-3p	ENSMUSG00000007950	Abhd8
mmu-miR-139-3p	ENSMUSG00000034911	Ushbp1
mmu-miR-151-5p	ENSMUSG00000002396	Ocel1
mmu-miR-532-5p	ENSMUSG00000002393	Nr2f6
mmu-miR-296-5p	ENSMUSG00000002393	Nr2f6
mmu-miR-666-3p	ENSMUSG00000002393	Nr2f6
mmu-miR-423-3p	ENSMUSG00000035439	Haus8
mmu-miR-139-5p	ENSMUSG00000035439	Haus8
mmu-miR-673-5p	ENSMUSG00000019261	Map1s
mmu-miR-671-5p	ENSMUSG00000019261	Map1s
mmu-miR-666-3p	ENSMUSG00000019261	Map1s
mmu-miR-673-5p	ENSMUSG00000007721	Ccdc124
mmu-miR-666-3p	ENSMUSG00000007721	Ccdc124
mmu-miR-671-3p	ENSMUSG00000020887	A230052G05Rik
mmu-miR-673-5p	ENSMUSG00000002910	Arrdc2
mmu-miR-409-5p	ENSMUSG00000000791	Il12rb1
mmu-miR-296-5p	ENSMUSG00000000791	Il12rb1
mmu-miR-337-5p	ENSMUSG00000031834	Pik3r2
mmu-miR-666-3p	ENSMUSG00000031834	Pik3r2
mmu-miR-423-5p	ENSMUSG00000035559	Mpv17l2
mmu-miR-671-5p	ENSMUSG00000035559	Mpv17l2
mmu-miR-296-5p	ENSMUSG00000035559	Mpv17l2
mmu-miR-331-3p	ENSMUSG00000031840	Rab3a
mmu-miR-666-3p	ENSMUSG00000031840	Rab3a
mmu-miR-574-3p	ENSMUSG00000071076	Jund
mmu-miR-139-3p	ENSMUSG00000031842	Pde4c
mmu-miR-501-3p	ENSMUSG00000031842	Pde4c
mmu-miR-501-3p	ENSMUSG00000031848	Lsm4
mmu-miR-423-5p	ENSMUSG00000038508	Gdf15
mmu-miR-331-3p	ENSMUSG00000070003	Ssbp4
mmu-miR-151-5p	ENSMUSG00000049988	Lrrc25
mmu-miR-574-3p	ENSMUSG00000070002	Ell
mmu-miR-673-5p	ENSMUSG00000019428	Fkbp8
mmu-miR-671-5p	ENSMUSG00000019428	Fkbp8
mmu-miR-423-3p	ENSMUSG00000055553	Kxd1
mmu-miR-409-5p	ENSMUSG00000055553	Kxd1
mmu-miR-369-5p	ENSMUSG00000055553	Kxd1
mmu-miR-331-3p	ENSMUSG00000035964	Tmem59l
mmu-miR-151-5p	ENSMUSG00000035964	Tmem59l
mmu-miR-296-5p	ENSMUSG00000035964	Tmem59l
mmu-miR-188-5p	ENSMUSG00000031849	Comp
mmu-miR-342-3p	ENSMUSG00000031849	Comp
mmu-miR-296-5p	ENSMUSG00000031849	Comp
mmu-miR-409-5p	ENSMUSG00000055681	Cope
mmu-miR-331-3p	ENSMUSG00000003573	Homer3
mmu-miR-574-3p	ENSMUSG00000003573	Homer3
mmu-miR-139-3p	ENSMUSG00000002343	Armc6
mmu-miR-139-5p	ENSMUSG00000002343	Armc6
mmu-miR-296-5p	ENSMUSG00000002343	Armc6
mmu-miR-666-3p	ENSMUSG00000002343	Armc6
mmu-miR-673-5p	ENSMUSG00000002342	Tmem161a
mmu-miR-671-3p	ENSMUSG00000071078	Nr2c2ap
mmu-miR-139-3p	ENSMUSG00000036120	Rfxank
mmu-miR-409-5p	ENSMUSG00000036120	Rfxank
mmu-miR-671-3p	ENSMUSG00000036120	Rfxank
mmu-miR-369-3p	ENSMUSG00000011306	Sugp1
mmu-miR-151-3p	ENSMUSG00000036180	Gatad2a
mmu-miR-337-5p	ENSMUSG00000047654	Tssk6
mmu-miR-409-5p	ENSMUSG00000031860	Pbx4
mmu-miR-666-3p	ENSMUSG00000031860	Pbx4
mmu-miR-666-3p	ENSMUSG00000036246	Gmip
mmu-miR-423-3p	ENSMUSG00000031862	Atp13a1
mmu-miR-296-5p	ENSMUSG00000031862	Atp13a1
mmu-miR-673-5p	ENSMUSG00000054648	Zfp869
mmu-miR-338-3p	ENSMUSG00000054648	Zfp869
mmu-miR-139-5p	ENSMUSG00000060427	Zfp868
mmu-miR-409-5p	ENSMUSG00000079038	Zfp781a
mmu-miR-423-5p	ENSMUSG00000036306	Lzts1
mmu-miR-671-3p	ENSMUSG00000036306	Lzts1
mmu-miR-666-3p	ENSMUSG00000036306	Lzts1
mmu-miR-34b-3p	ENSMUSG00000015568	Lpl
mmu-miR-574-3p	ENSMUSG00000053886	Sh2d4a
mmu-miR-139-5p	ENSMUSG00000053886	Sh2d4a
mmu-miR-409-5p	ENSMUSG00000030465	Psd3
mmu-miR-188-5p	ENSMUSG00000030465	Psd3
mmu-miR-338-3p	ENSMUSG00000030465	Psd3
mmu-miR-369-5p	ENSMUSG00000044014	Npy5r
mmu-miR-151-3p	ENSMUSG00000025591	Tma16
mmu-miR-188-5p	ENSMUSG00000074300	Smim31
mmu-miR-369-3p	ENSMUSG00000074300	Smim31
mmu-miR-338-3p	ENSMUSG00000025521	Tmem192
mmu-miR-671-3p	ENSMUSG00000025521	Tmem192
mmu-miR-139-5p	ENSMUSG00000037852	Cpe
mmu-miR-532-5p	ENSMUSG00000031641	Cbr4
mmu-miR-151-5p	ENSMUSG00000031644	Nek1
mmu-miR-532-5p	ENSMUSG00000038005	Hpf1
mmu-miR-139-5p	ENSMUSG00000031647	Mfap3l
mmu-miR-337-5p	ENSMUSG00000031647	Mfap3l
mmu-miR-296-5p	ENSMUSG00000031647	Mfap3l
mmu-miR-423-3p	ENSMUSG00000031609	Sap30
mmu-miR-337-5p	ENSMUSG00000031609	Sap30
mmu-miR-671-3p	ENSMUSG00000038193	Hand2
mmu-miR-423-5p	ENSMUSG00000046258	Adam29
mmu-miR-151-5p	ENSMUSG00000046258	Adam29
mmu-miR-369-3p	ENSMUSG00000031520	Vegfc
mmu-miR-139-3p	ENSMUSG00000031562	Dctd
mmu-miR-671-3p	ENSMUSG00000061974	Cldn24
mmu-miR-188-5p	ENSMUSG00000074357	AA386476
mmu-miR-342-3p	ENSMUSG00000074357	AA386476
mmu-miR-574-3p	ENSMUSG00000031568	Rwdd4a
mmu-miR-34b-3p	ENSMUSG00000038102	Trappc11
mmu-miR-574-3p	ENSMUSG00000031629	Cenpu
mmu-miR-338-3p	ENSMUSG00000031633	Slc25a4
mmu-miR-369-5p	ENSMUSG00000038291	Snx25
mmu-miR-673-5p	ENSMUSG00000031634	Ufsp2
mmu-miR-337-5p	ENSMUSG00000071103	Cfap96
mmu-miR-369-3p	ENSMUSG00000031636	Pdlim3
mmu-miR-532-5p	ENSMUSG00000109764	Klkb1
mmu-miR-369-5p	ENSMUSG00000109764	Klkb1
mmu-miR-139-3p	ENSMUSG00000031645	F11
mmu-miR-139-5p	ENSMUSG00000031645	F11
mmu-miR-151-3p	ENSMUSG00000054764	Mtnr1a
mmu-miR-337-5p	ENSMUSG00000070047	Fat1
mmu-miR-188-5p	ENSMUSG00000051176	Zfp42
mmu-miR-369-5p	ENSMUSG00000051176	Zfp42
mmu-miR-532-5p	ENSMUSG00000031651	Triml1
mmu-miR-369-5p	ENSMUSG00000031651	Triml1
mmu-miR-574-3p	ENSMUSG00000031592	Pcm1
mmu-miR-338-3p	ENSMUSG00000045636	Mtus1
mmu-miR-139-3p	ENSMUSG00000031595	Pdgfrl
mmu-miR-151-3p	ENSMUSG00000031595	Pdgfrl
mmu-miR-574-3p	ENSMUSG00000031596	Slc7a2
mmu-miR-34b-3p	ENSMUSG00000031596	Slc7a2
mmu-miR-369-3p	ENSMUSG00000071937	Adam25
mmu-miR-409-5p	ENSMUSG00000046723	Adam24
mmu-miR-369-3p	ENSMUSG00000046723	Adam24
mmu-miR-342-3p	ENSMUSG00000046723	Adam24
mmu-miR-151-5p	ENSMUSG00000046723	Adam24
mmu-miR-34b-3p	ENSMUSG00000039431	Mtmr7
mmu-miR-139-5p	ENSMUSG00000031603	Fgf20
mmu-miR-337-5p	ENSMUSG00000031603	Fgf20
mmu-miR-34b-3p	ENSMUSG00000074384	AI429214
mmu-miR-188-5p	ENSMUSG00000074384	AI429214
mmu-miR-338-3p	ENSMUSG00000074384	AI429214
mmu-miR-574-3p	ENSMUSG00000031523	Dlc1
mmu-miR-139-5p	ENSMUSG00000031523	Dlc1
mmu-miR-188-5p	ENSMUSG00000031523	Dlc1
mmu-miR-501-3p	ENSMUSG00000055976	Cldn23
mmu-miR-151-5p	ENSMUSG00000046794	Ppp1r3b
mmu-miR-139-3p	ENSMUSG00000031530	Dusp4
mmu-miR-423-3p	ENSMUSG00000031532	Saraf
mmu-miR-337-5p	ENSMUSG00000031532	Saraf
mmu-miR-369-3p	ENSMUSG00000031586	Rbpms
mmu-miR-574-3p	ENSMUSG00000049476	1700104B16Rik
mmu-miR-338-3p	ENSMUSG00000031584	Gsr
mmu-miR-139-3p	ENSMUSG00000009630	Ppp2cb
mmu-miR-423-5p	ENSMUSG00000031577	Tti2
mmu-miR-369-5p	ENSMUSG00000039661	Dusp26
mmu-miR-342-3p	ENSMUSG00000039661	Dusp26
mmu-miR-671-5p	ENSMUSG00000039661	Dusp26
mmu-miR-532-5p	ENSMUSG00000063932	Poteg
mmu-miR-666-3p	ENSMUSG00000031491	Chrna6
mmu-miR-139-5p	ENSMUSG00000071138	Tex24
mmu-miR-423-3p	ENSMUSG00000031490	Eif4ebp1
mmu-miR-139-3p	ENSMUSG00000031489	Adrb3
mmu-miR-409-5p	ENSMUSG00000031486	Adgra2
mmu-miR-671-3p	ENSMUSG00000031486	Adgra2
mmu-miR-34b-3p	ENSMUSG00000031487	Brf2
mmu-miR-501-3p	ENSMUSG00000031487	Brf2
mmu-miR-574-3p	ENSMUSG00000031485	Plpbp
mmu-miR-188-5p	ENSMUSG00000031485	Plpbp
mmu-miR-501-3p	ENSMUSG00000037234	Hook3
mmu-miR-501-3p	ENSMUSG00000015994	Fnta
mmu-miR-337-5p	ENSMUSG00000015994	Fnta
mmu-miR-409-5p	ENSMUSG00000015994	Fnta
mmu-miR-188-5p	ENSMUSG00000037260	Hgsnat
mmu-miR-331-3p	ENSMUSG00000037260	Hgsnat
mmu-miR-574-3p	ENSMUSG00000031576	Kcnu1
mmu-miR-369-3p	ENSMUSG00000031576	Kcnu1
mmu-miR-369-5p	ENSMUSG00000037363	Letm2
mmu-miR-423-3p	ENSMUSG00000031565	Fgfr1
mmu-miR-342-3p	ENSMUSG00000031565	Fgfr1
mmu-miR-369-3p	ENSMUSG00000031556	Tm2d2
mmu-miR-342-3p	ENSMUSG00000031556	Tm2d2
mmu-miR-337-5p	ENSMUSG00000031554	Adam5
mmu-miR-296-5p	ENSMUSG00000053979	A730045E13Rik
mmu-miR-671-5p	ENSMUSG00000031546	Gins4
mmu-miR-423-3p	ENSMUSG00000063672	Nkx6-3
mmu-miR-337-5p	ENSMUSG00000063672	Nkx6-3
mmu-miR-666-3p	ENSMUSG00000063672	Nkx6-3
mmu-miR-337-5p	ENSMUSG00000031540	Kat6a
mmu-miR-574-3p	ENSMUSG00000054822	1700041G16Rik
mmu-miR-369-3p	ENSMUSG00000031538	Plat
mmu-miR-151-3p	ENSMUSG00000031537	Ikbkb
mmu-miR-188-5p	ENSMUSG00000031536	Polb
mmu-miR-532-5p	ENSMUSG00000008892	Vdac3
mmu-miR-337-5p	ENSMUSG00000037656	Slc20a2
mmu-miR-423-3p	ENSMUSG00000031534	Smim19
mmu-miR-423-5p	ENSMUSG00000031534	Smim19
mmu-miR-34b-3p	ENSMUSG00000031533	Mrps31
mmu-miR-369-5p	ENSMUSG00000031533	Mrps31
mmu-miR-423-3p	ENSMUSG00000031479	Vps36
mmu-miR-338-3p	ENSMUSG00000037725	Ckap2
mmu-miR-151-3p	ENSMUSG00000037725	Ckap2
mmu-miR-139-5p	ENSMUSG00000006567	Atp7b
mmu-miR-666-3p	ENSMUSG00000006567	Atp7b
mmu-miR-188-5p	ENSMUSG00000017049	Ccdc70
mmu-miR-409-5p	ENSMUSG00000017049	Ccdc70
mmu-miR-151-5p	ENSMUSG00000017049	Ccdc70
mmu-miR-423-5p	ENSMUSG00000044222	Defb13
mmu-miR-151-3p	ENSMUSG00000044222	Defb13
mmu-miR-151-5p	ENSMUSG00000044222	Defb13
mmu-miR-369-3p	ENSMUSG00000058052	Defb35
mmu-miR-338-3p	ENSMUSG00000064213	Defa24
mmu-miR-338-3p	ENSMUSG00000063206	Defa34
mmu-miR-666-3p	ENSMUSG00000063206	Defa34
mmu-miR-338-3p	ENSMUSG00000060208	Defa17
mmu-miR-666-3p	ENSMUSG00000060208	Defa17
mmu-miR-34b-3p	ENSMUSG00000074434	Defa28
mmu-miR-338-3p	ENSMUSG00000074434	Defa28
mmu-miR-338-3p	ENSMUSG00000060070	Defa26
mmu-miR-338-3p	ENSMUSG00000065956	Defa37
mmu-miR-338-3p	ENSMUSG00000094818	Defa32
mmu-miR-338-3p	ENSMUSG00000094662	Defa36
mmu-miR-338-3p	ENSMUSG00000095066	Defa20
mmu-miR-34b-3p	ENSMUSG00000074436	Defa-ps18
mmu-miR-338-3p	ENSMUSG00000074436	Defa-ps18
mmu-miR-338-3p	ENSMUSG00000074439	Defa5
mmu-miR-338-3p	ENSMUSG00000074440	Defa3
mmu-miR-666-3p	ENSMUSG00000074440	Defa3
mmu-miR-338-3p	ENSMUSG00000074441	Defa40
mmu-miR-338-3p	ENSMUSG00000074443	Defa22
mmu-miR-338-3p	ENSMUSG00000074442	Defa31
mmu-miR-666-3p	ENSMUSG00000074442	Defa31
mmu-miR-666-3p	ENSMUSG00000074444	Defa30
mmu-miR-338-3p	ENSMUSG00000061845	Defa35
mmu-miR-338-3p	ENSMUSG00000074447	Defa21
mmu-miR-338-3p	ENSMUSG00000074446	Defa23
mmu-miR-666-3p	ENSMUSG00000074446	Defa23
mmu-miR-574-3p	ENSMUSG00000071165	Gm6040
mmu-miR-188-5p	ENSMUSG00000059230	Defb4
mmu-miR-574-3p	ENSMUSG00000046354	Defb14
mmu-miR-501-3p	ENSMUSG00000046354	Defb14
mmu-miR-501-3p	ENSMUSG00000079842	Spag11a
mmu-miR-338-3p	ENSMUSG00000059463	Spag11b
mmu-miR-369-3p	ENSMUSG00000043787	Defb12
mmu-miR-671-5p	ENSMUSG00000039814	Xkr5
mmu-miR-34b-3p	ENSMUSG00000039842	Mcph1
mmu-miR-369-3p	ENSMUSG00000039842	Mcph1
mmu-miR-34b-3p	ENSMUSG00000031461	Myom2
mmu-miR-342-3p	ENSMUSG00000031461	Myom2
mmu-miR-337-5p	ENSMUSG00000049008	BB014433
mmu-miR-369-5p	ENSMUSG00000026317	Cln8
mmu-miR-139-5p	ENSMUSG00000050052	Tdrp
mmu-miR-338-3p	ENSMUSG00000050052	Tdrp
mmu-miR-331-3p	ENSMUSG00000068631	Gm7676
mmu-miR-501-3p	ENSMUSG00000047710	Champ1
mmu-miR-337-5p	ENSMUSG00000047710	Champ1
mmu-miR-342-3p	ENSMUSG00000031458	Coprs
mmu-miR-666-3p	ENSMUSG00000038398	Upf3a
mmu-miR-331-3p	ENSMUSG00000038416	Cdc16
mmu-miR-666-3p	ENSMUSG00000038416	Cdc16
mmu-miR-423-3p	ENSMUSG00000031451	Gas6
mmu-miR-369-3p	ENSMUSG00000031451	Gas6
mmu-miR-151-3p	ENSMUSG00000031451	Gas6
mmu-miR-666-3p	ENSMUSG00000031451	Gas6
mmu-miR-671-3p	ENSMUSG00000031452	1700029H14Rik
mmu-miR-296-5p	ENSMUSG00000031450	Grk1
mmu-miR-673-5p	ENSMUSG00000031449	Atp4b
mmu-miR-574-3p	ENSMUSG00000038497	Tmco3
mmu-miR-342-3p	ENSMUSG00000038497	Tmco3
mmu-miR-139-3p	ENSMUSG00000031447	Lamp1
mmu-miR-574-3p	ENSMUSG00000031444	F10
mmu-miR-666-3p	ENSMUSG00000031444	F10
mmu-miR-574-3p	ENSMUSG00000031443	F7
mmu-miR-139-3p	ENSMUSG00000031443	F7
mmu-miR-666-3p	ENSMUSG00000031443	F7
mmu-miR-34b-3p	ENSMUSG00000031441	Atp11a
mmu-miR-423-3p	ENSMUSG00000031441	Atp11a
mmu-miR-188-5p	ENSMUSG00000031511	Arhgef7
mmu-miR-34b-3p	ENSMUSG00000031509	Spaca7b
mmu-miR-139-5p	ENSMUSG00000031508	Ankrd10
mmu-miR-337-5p	ENSMUSG00000045969	Ing1
mmu-miR-423-5p	ENSMUSG00000031505	Naxd
mmu-miR-671-5p	ENSMUSG00000031505	Naxd
mmu-miR-151-3p	ENSMUSG00000031504	Rab20
mmu-miR-342-3p	ENSMUSG00000031504	Rab20
mmu-miR-666-3p	ENSMUSG00000031504	Rab20
mmu-miR-338-3p	ENSMUSG00000031503	Col4a2
mmu-miR-369-5p	ENSMUSG00000031503	Col4a2
mmu-miR-342-3p	ENSMUSG00000038894	Irs2
mmu-miR-409-5p	ENSMUSG00000109084	Gm44955
mmu-miR-671-3p	ENSMUSG00000109084	Gm44955
mmu-miR-574-3p	ENSMUSG00000031497	Tnfsf13b
mmu-miR-574-3p	ENSMUSG00000040396	Abhd13
mmu-miR-574-3p	ENSMUSG00000023073	Slc10a2
mmu-miR-369-3p	ENSMUSG00000022322	Shcbp1
mmu-miR-369-5p	ENSMUSG00000058748	Zfp958
mmu-miR-574-3p	ENSMUSG00000008206	Cers4
mmu-miR-574-3p	ENSMUSG00000023235	Ccl25
mmu-miR-342-3p	ENSMUSG00000023235	Ccl25
mmu-miR-369-5p	ENSMUSG00000023235	Ccl25
mmu-miR-331-3p	ENSMUSG00000023235	Ccl25
mmu-miR-139-3p	ENSMUSG00000002949	Timm44
mmu-miR-673-5p	ENSMUSG00000002949	Timm44
mmu-miR-338-3p	ENSMUSG00000011837	Snapc2
mmu-miR-331-3p	ENSMUSG00000002948	Map2k7
mmu-miR-139-3p	ENSMUSG00000065987	Cd209b
mmu-miR-34b-3p	ENSMUSG00000031494	Cd209a
mmu-miR-574-3p	ENSMUSG00000013974	Mcemp1
mmu-miR-532-5p	ENSMUSG00000013974	Mcemp1
mmu-miR-574-3p	ENSMUSG00000012705	Retn
mmu-miR-673-5p	ENSMUSG00000044433	Camsap3
mmu-miR-671-3p	ENSMUSG00000044433	Camsap3
mmu-miR-151-5p	ENSMUSG00000044433	Camsap3
mmu-miR-574-3p	ENSMUSG00000004565	Pnpla6
mmu-miR-409-5p	ENSMUSG00000004565	Pnpla6
mmu-miR-671-3p	ENSMUSG00000004567	Mcoln1
mmu-miR-34b-3p	ENSMUSG00000047264	Zfp358
mmu-miR-369-3p	ENSMUSG00000047264	Zfp358
mmu-miR-296-5p	ENSMUSG00000040340	Saxo5
mmu-miR-671-3p	ENSMUSG00000069633	Pex11g
mmu-miR-337-5p	ENSMUSG00000004568	Arhgef18
mmu-miR-188-5p	ENSMUSG00000004568	Arhgef18
mmu-miR-423-3p	ENSMUSG00000005534	Insr
mmu-miR-409-5p	ENSMUSG00000059326	Csf2ra
mmu-miR-34b-3p	ENSMUSG00000120514	Gm56644
mmu-miR-139-5p	ENSMUSG00000003228	Grk5
mmu-miR-331-3p	ENSMUSG00000003228	Grk5
mmu-miR-139-5p	ENSMUSG00000063698	Sfxn4
mmu-miR-34b-3p	ENSMUSG00000045052	Prlhr
mmu-miR-338-3p	ENSMUSG00000053117	E330013P04Rik
mmu-miR-337-5p	ENSMUSG00000040022	Rab11fip2
mmu-miR-34b-3p	ENSMUSG00000043969	Emx2
mmu-miR-369-5p	ENSMUSG00000074746	Pdzd8
mmu-miR-409-5p	ENSMUSG00000040901	Kcnk18
mmu-miR-409-5p	ENSMUSG00000041362	Shtn1
mmu-miR-296-5p	ENSMUSG00000042179	Pnliprp1
mmu-miR-34b-3p	ENSMUSG00000025090	Ccdc172
mmu-miR-671-3p	ENSMUSG00000025090	Ccdc172
mmu-miR-34b-3p	ENSMUSG00000025089	Gfra1
mmu-miR-151-5p	ENSMUSG00000025089	Gfra1
mmu-miR-532-5p	ENSMUSG00000025086	Trub1
mmu-miR-409-5p	ENSMUSG00000025082	Vwa2
mmu-miR-151-5p	ENSMUSG00000025081	Tdrd1
mmu-miR-574-3p	ENSMUSG00000035173	Ccdc186
mmu-miR-423-3p	ENSMUSG00000035283	Adrb1
mmu-miR-34b-3p	ENSMUSG00000035818	Plekhs1
mmu-miR-337-5p	ENSMUSG00000025076	Casp7
mmu-miR-671-5p	ENSMUSG00000025075	Habp2
mmu-miR-574-3p	ENSMUSG00000049134	Nrap
mmu-miR-532-5p	ENSMUSG00000049134	Nrap
mmu-miR-151-3p	ENSMUSG00000049134	Nrap
mmu-miR-532-5p	ENSMUSG00000024982	Zdhhc6
mmu-miR-139-5p	ENSMUSG00000055523	Gucy2g
mmu-miR-532-5p	ENSMUSG00000024975	Pdcd4
mmu-miR-337-5p	ENSMUSG00000071497	Nutf2-ps1
mmu-miR-409-5p	ENSMUSG00000071497	Nutf2-ps1
mmu-miR-409-5p	ENSMUSG00000034765	Dusp5
mmu-miR-369-5p	ENSMUSG00000025026	Add3
mmu-miR-188-5p	ENSMUSG00000062083	Rpl13a-ps1
mmu-miR-188-5p	ENSMUSG00000046585	Cfap58
mmu-miR-337-5p	ENSMUSG00000025068	Gsto1
mmu-miR-501-3p	ENSMUSG00000117975	Itprip
mmu-miR-369-5p	ENSMUSG00000044948	Cfap43
mmu-miR-338-3p	ENSMUSG00000025064	Col17a1
mmu-miR-151-5p	ENSMUSG00000025064	Col17a1
mmu-miR-139-3p	ENSMUSG00000042694	Stn1
mmu-miR-296-5p	ENSMUSG00000042694	Stn1
mmu-miR-666-3p	ENSMUSG00000053617	Sh3pxd2a
mmu-miR-369-5p	ENSMUSG00000033033	Calhm2
mmu-miR-337-5p	ENSMUSG00000025047	Pdcd11
mmu-miR-188-5p	ENSMUSG00000025047	Pdcd11
mmu-miR-532-5p	ENSMUSG00000025047	Pdcd11
mmu-miR-338-3p	ENSMUSG00000025047	Pdcd11
mmu-miR-369-3p	ENSMUSG00000025047	Pdcd11
mmu-miR-666-3p	ENSMUSG00000025047	Pdcd11
mmu-miR-139-5p	ENSMUSG00000034336	Ina
mmu-miR-338-3p	ENSMUSG00000034336	Ina
mmu-miR-666-3p	ENSMUSG00000034336	Ina
mmu-miR-151-5p	ENSMUSG00000025041	Nt5c2
mmu-miR-296-5p	ENSMUSG00000062376	Borcs7
mmu-miR-532-5p	ENSMUSG00000025034	Trim8
mmu-miR-673-5p	ENSMUSG00000025227	Mfsd13a
mmu-miR-666-3p	ENSMUSG00000025227	Mfsd13a
mmu-miR-423-3p	ENSMUSG00000036748	Cuedc2
mmu-miR-671-5p	ENSMUSG00000036748	Cuedc2
mmu-miR-139-5p	ENSMUSG00000025226	Fbxl15
mmu-miR-296-5p	ENSMUSG00000025226	Fbxl15
mmu-miR-296-5p	ENSMUSG00000037126	Psd
mmu-miR-296-5p	ENSMUSG00000025225	Nfkb2
mmu-miR-188-5p	ENSMUSG00000025229	Pitx3
mmu-miR-331-3p	ENSMUSG00000025224	Gbf1
mmu-miR-296-5p	ENSMUSG00000025224	Gbf1
mmu-miR-666-3p	ENSMUSG00000025224	Gbf1
mmu-miR-409-5p	ENSMUSG00000038754	Elovl3
mmu-miR-188-5p	ENSMUSG00000055491	Pprc1
mmu-miR-409-5p	ENSMUSG00000055491	Pprc1
mmu-miR-532-5p	ENSMUSG00000025223	Ldb1
mmu-miR-151-5p	ENSMUSG00000025223	Ldb1
mmu-miR-673-5p	ENSMUSG00000025223	Ldb1
mmu-miR-342-3p	ENSMUSG00000074811	Hps6
mmu-miR-666-3p	ENSMUSG00000025221	Kcnip2
mmu-miR-139-5p	ENSMUSG00000056209	Npm3
mmu-miR-409-5p	ENSMUSG00000056209	Npm3
mmu-miR-369-5p	ENSMUSG00000056209	Npm3
mmu-miR-671-5p	ENSMUSG00000056209	Npm3
mmu-miR-296-5p	ENSMUSG00000025219	Fgf8
mmu-miR-666-3p	ENSMUSG00000040913	Fbxw4
mmu-miR-671-3p	ENSMUSG00000041035	Dpcd
mmu-miR-369-5p	ENSMUSG00000025217	Btrc
mmu-miR-673-5p	ENSMUSG00000025218	Poll
mmu-miR-409-5p	ENSMUSG00000025218	Poll
mmu-miR-331-3p	ENSMUSG00000025216	Lbx1
mmu-miR-423-3p	ENSMUSG00000025213	Kazald1
mmu-miR-409-5p	ENSMUSG00000025213	Kazald1
mmu-miR-423-3p	ENSMUSG00000035342	Lzts2
mmu-miR-188-5p	ENSMUSG00000035342	Lzts2
mmu-miR-423-3p	ENSMUSG00000025209	Twnk
mmu-miR-188-5p	ENSMUSG00000025209	Twnk
mmu-miR-34b-3p	ENSMUSG00000036097	Slf2
mmu-miR-423-3p	ENSMUSG00000004231	Pax2
mmu-miR-423-5p	ENSMUSG00000004231	Pax2
mmu-miR-337-5p	ENSMUSG00000004231	Pax2
mmu-miR-409-5p	ENSMUSG00000036450	Hif1an
mmu-miR-338-3p	ENSMUSG00000036961	Wnt8b
mmu-miR-671-5p	ENSMUSG00000036961	Wnt8b
mmu-miR-139-3p	ENSMUSG00000051984	Sec31b
mmu-miR-671-5p	ENSMUSG00000051984	Sec31b
mmu-miR-296-5p	ENSMUSG00000037578	Pkd2l1
mmu-miR-139-5p	ENSMUSG00000057506	Bloc1s2
mmu-miR-673-5p	ENSMUSG00000025200	Cwf19l1
mmu-miR-188-5p	ENSMUSG00000025199	Chuk
mmu-miR-151-3p	ENSMUSG00000025197	Cyp2c23
mmu-miR-671-5p	ENSMUSG00000025195	Dnmbp
mmu-miR-574-3p	ENSMUSG00000025194	Abcc2
mmu-miR-671-3p	ENSMUSG00000025193	Cutc
mmu-miR-671-3p	ENSMUSG00000040018	Cox15
mmu-miR-501-3p	ENSMUSG00000025192	Entpd7
mmu-miR-139-3p	ENSMUSG00000040414	Slc25a28
mmu-miR-423-5p	ENSMUSG00000040414	Slc25a28
mmu-miR-337-5p	ENSMUSG00000040414	Slc25a28
mmu-miR-338-3p	ENSMUSG00000040414	Slc25a28
mmu-miR-574-3p	ENSMUSG00000025190	Got1
mmu-miR-139-5p	ENSMUSG00000025190	Got1
mmu-miR-671-3p	ENSMUSG00000025190	Got1
mmu-miR-671-3p	ENSMUSG00000044220	Nkx2-3
mmu-miR-409-5p	ENSMUSG00000047509	Gm6776
mmu-miR-188-5p	ENSMUSG00000074852	Hpse2
mmu-miR-532-5p	ENSMUSG00000074852	Hpse2
mmu-miR-337-5p	ENSMUSG00000025188	Hps1
mmu-miR-671-3p	ENSMUSG00000025188	Hps1
mmu-miR-151-5p	ENSMUSG00000025188	Hps1
mmu-miR-666-3p	ENSMUSG00000025188	Hps1
mmu-miR-369-5p	ENSMUSG00000060224	Pyroxd2
mmu-miR-574-3p	ENSMUSG00000025184	R3hcc1l
mmu-miR-369-5p	ENSMUSG00000042401	Crtac1
mmu-miR-139-3p	ENSMUSG00000018822	Sfrp5
mmu-miR-139-5p	ENSMUSG00000018822	Sfrp5
mmu-miR-671-3p	ENSMUSG00000018822	Sfrp5
mmu-miR-338-3p	ENSMUSG00000025172	Ankrd2
mmu-miR-151-3p	ENSMUSG00000025172	Ankrd2
mmu-miR-666-3p	ENSMUSG00000025172	Ankrd2
mmu-miR-423-5p	ENSMUSG00000025171	Ubtd1
mmu-miR-671-3p	ENSMUSG00000025171	Ubtd1
mmu-miR-296-5p	ENSMUSG00000025171	Ubtd1
mmu-miR-423-3p	ENSMUSG00000025157	Zdhhc16
mmu-miR-532-5p	ENSMUSG00000025157	Zdhhc16
mmu-miR-673-5p	ENSMUSG00000025159	Mms19
mmu-miR-338-3p	ENSMUSG00000025159	Mms19
mmu-miR-671-3p	ENSMUSG00000025159	Mms19
mmu-miR-673-5p	ENSMUSG00000035049	Rrp12
mmu-miR-331-3p	ENSMUSG00000035049	Rrp12
mmu-miR-423-3p	ENSMUSG00000025020	Slit1
mmu-miR-501-3p	ENSMUSG00000025019	Lcor
mmu-miR-151-5p	ENSMUSG00000025019	Lcor
mmu-miR-151-5p	ENSMUSG00000044065	Gm9788
mmu-miR-409-5p	ENSMUSG00000025017	Pik3ap1
mmu-miR-151-3p	ENSMUSG00000025017	Pik3ap1
mmu-miR-501-3p	ENSMUSG00000050121	Opalin
mmu-miR-338-3p	ENSMUSG00000025014	Dntt
mmu-miR-369-5p	ENSMUSG00000061132	Blnk
mmu-miR-151-5p	ENSMUSG00000025008	Tctn3
mmu-miR-673-5p	ENSMUSG00000054827	Cyp2c50
mmu-miR-673-5p	ENSMUSG00000067225	Cyp2c54
mmu-miR-337-5p	ENSMUSG00000074882	Cyp2c68
mmu-miR-337-5p	ENSMUSG00000062624	Cyp2c67
mmu-miR-369-3p	ENSMUSG00000025003	Cyp2c39
mmu-miR-673-5p	ENSMUSG00000003053	Cyp2c29
mmu-miR-151-3p	ENSMUSG00000025002	Cyp2c55
mmu-miR-139-3p	ENSMUSG00000025001	Hells
mmu-miR-369-3p	ENSMUSG00000048720	Tbc1d12
mmu-miR-671-3p	ENSMUSG00000048720	Tbc1d12
mmu-miR-342-3p	ENSMUSG00000024999	Noc3l
mmu-miR-337-5p	ENSMUSG00000054237	Fra10ac1
mmu-miR-369-5p	ENSMUSG00000054237	Fra10ac1
mmu-miR-337-5p	ENSMUSG00000024989	Cep55
mmu-miR-666-3p	ENSMUSG00000024989	Cep55
mmu-miR-501-3p	ENSMUSG00000048612	Myof
mmu-miR-34b-3p	ENSMUSG00000062432	Cyp26c1
mmu-miR-139-3p	ENSMUSG00000024987	Cyp26a1
mmu-miR-369-3p	ENSMUSG00000024987	Cyp26a1
mmu-miR-139-5p	ENSMUSG00000053799	Exoc6
mmu-miR-369-3p	ENSMUSG00000053799	Exoc6
mmu-miR-188-5p	ENSMUSG00000024986	Hhex
mmu-miR-671-5p	ENSMUSG00000023307	Marchf5
mmu-miR-331-3p	ENSMUSG00000047632	Fgfbp3
mmu-miR-532-5p	ENSMUSG00000067279	Ppp1r3c
mmu-miR-342-3p	ENSMUSG00000067279	Ppp1r3c
mmu-miR-139-3p	ENSMUSG00000024805	Pcgf5
mmu-miR-151-5p	ENSMUSG00000024805	Pcgf5
mmu-miR-369-5p	ENSMUSG00000024803	Ankrd1
mmu-miR-369-3p	ENSMUSG00000024800	Rpp30
mmu-miR-151-3p	ENSMUSG00000024800	Rpp30
mmu-miR-188-5p	ENSMUSG00000024798	Htr7
mmu-miR-34b-3p	ENSMUSG00000033610	Pank1
mmu-miR-139-5p	ENSMUSG00000034459	Ifit1
mmu-miR-139-5p	ENSMUSG00000062488	Ifit3b
mmu-miR-139-5p	ENSMUSG00000074896	Ifit3
mmu-miR-338-3p	ENSMUSG00000024774	Ankrd22
mmu-miR-139-3p	ENSMUSG00000024776	Stambpl1
mmu-miR-501-3p	ENSMUSG00000056078	Lipm
mmu-miR-369-3p	ENSMUSG00000056078	Lipm
mmu-miR-666-3p	ENSMUSG00000024771	Lipk
mmu-miR-671-5p	ENSMUSG00000037603	Gm5519
mmu-miR-369-3p	ENSMUSG00000071573	Rnls
mmu-miR-574-3p	ENSMUSG00000013662	Atad1
mmu-miR-671-5p	ENSMUSG00000024896	Minpp1
mmu-miR-139-5p	ENSMUSG00000040451	Sgms1
mmu-miR-369-3p	ENSMUSG00000040451	Sgms1
mmu-miR-532-5p	ENSMUSG00000053536	Cstf2t
mmu-miR-342-3p	ENSMUSG00000024868	Dkk1
mmu-miR-337-5p	ENSMUSG00000024863	Mbl2
mmu-miR-151-5p	ENSMUSG00000024863	Mbl2
mmu-miR-338-3p	ENSMUSG00000024827	Gldc
mmu-miR-139-5p	ENSMUSG00000024817	Uhrf2
mmu-miR-369-3p	ENSMUSG00000038658	Ric1
mmu-miR-501-3p	ENSMUSG00000016495	Plgrkt
mmu-miR-369-3p	ENSMUSG00000016495	Plgrkt
mmu-miR-337-5p	ENSMUSG00000024789	Jak2
mmu-miR-673-5p	ENSMUSG00000024785	Rcl1
mmu-miR-151-3p	ENSMUSG00000024785	Rcl1
mmu-miR-296-5p	ENSMUSG00000024785	Rcl1
mmu-miR-369-5p	ENSMUSG00000024782	Ak3
mmu-miR-139-3p	ENSMUSG00000064202	Spata6l
mmu-miR-532-5p	ENSMUSG00000064202	Spata6l
mmu-miR-673-5p	ENSMUSG00000040929	Rfx3
mmu-miR-501-3p	ENSMUSG00000040929	Rfx3
mmu-miR-501-3p	ENSMUSG00000041360	Pum3
mmu-miR-188-5p	ENSMUSG00000041360	Pum3
mmu-miR-151-3p	ENSMUSG00000024924	Vldlr
mmu-miR-409-5p	ENSMUSG00000074913	Gm815
mmu-miR-337-5p	ENSMUSG00000024837	Dmrt1
mmu-miR-139-5p	ENSMUSG00000024878	Zng1
mmu-miR-337-5p	ENSMUSG00000024878	Zng1
mmu-miR-671-5p	ENSMUSG00000051490	Foxd4
mmu-miR-139-5p	ENSMUSG00000048572	Tmem252
mmu-miR-342-3p	ENSMUSG00000048572	Tmem252
mmu-miR-369-5p	ENSMUSG00000074922	Pabir1
mmu-miR-369-5p	ENSMUSG00000024867	Pip5k1b
mmu-miR-338-3p	ENSMUSG00000059363	Fxn
mmu-miR-188-5p	ENSMUSG00000033207	Mamdc2
mmu-miR-409-5p	ENSMUSG00000033207	Mamdc2
mmu-miR-296-5p	ENSMUSG00000024943	Smc5
mmu-miR-671-3p	ENSMUSG00000052387	Trpm3
mmu-miR-666-3p	ENSMUSG00000052387	Trpm3
mmu-miR-188-5p	ENSMUSG00000047368	Abhd17b
mmu-miR-423-5p	ENSMUSG00000053279	Aldh1a1
mmu-miR-671-3p	ENSMUSG00000047168	Gm6684
mmu-miR-337-5p	ENSMUSG00000036192	Rorb
mmu-miR-34b-3p	ENSMUSG00000024727	Trpm6
mmu-miR-574-3p	ENSMUSG00000024725	Ostf1
mmu-miR-139-5p	ENSMUSG00000024725	Ostf1
mmu-miR-574-3p	ENSMUSG00000024713	Pcsk5
mmu-miR-338-3p	ENSMUSG00000024713	Pcsk5
mmu-miR-338-3p	ENSMUSG00000024712	Rfk
mmu-miR-671-3p	ENSMUSG00000024712	Rfk
mmu-miR-532-5p	ENSMUSG00000046230	Vps13a
mmu-miR-423-3p	ENSMUSG00000024697	Gna14
mmu-miR-139-3p	ENSMUSG00000063586	Gm5513
mmu-miR-369-3p	ENSMUSG00000024642	Tle4
mmu-miR-331-3p	ENSMUSG00000059105	Or9i16
mmu-miR-369-3p	ENSMUSG00000044040	Or9q2
mmu-miR-369-5p	ENSMUSG00000061387	Or10w1
mmu-miR-338-3p	ENSMUSG00000045678	Or5b124
mmu-miR-342-3p	ENSMUSG00000096289	Or5b122
mmu-miR-501-3p	ENSMUSG00000057503	Or5b106
mmu-miR-532-5p	ENSMUSG00000046913	Or5b99
mmu-miR-188-5p	ENSMUSG00000048456	Or5b12
mmu-miR-369-3p	ENSMUSG00000046272	Or5b21
mmu-miR-423-3p	ENSMUSG00000024694	Keg1
mmu-miR-532-5p	ENSMUSG00000024694	Keg1
mmu-miR-369-3p	ENSMUSG00000024694	Keg1
mmu-miR-331-3p	ENSMUSG00000063683	Glyat
mmu-miR-532-5p	ENSMUSG00000039982	Dtx4
mmu-miR-34b-3p	ENSMUSG00000067525	Or4z4
mmu-miR-369-3p	ENSMUSG00000046139	Patl1
mmu-miR-331-3p	ENSMUSG00000046139	Patl1
mmu-miR-338-3p	ENSMUSG00000051548	Gm6365
mmu-miR-34b-3p	ENSMUSG00000067545	Or10q3
mmu-miR-409-5p	ENSMUSG00000060556	Or10v9
mmu-miR-188-5p	ENSMUSG00000048292	Or10v5
mmu-miR-151-5p	ENSMUSG00000024682	Cblif
mmu-miR-337-5p	ENSMUSG00000041857	Oosp1
mmu-miR-342-3p	ENSMUSG00000024679	Ms4a6d
mmu-miR-369-5p	ENSMUSG00000024680	Ms4a2
mmu-miR-342-3p	ENSMUSG00000024678	Ms4a4d
mmu-miR-338-3p	ENSMUSG00000024728	Ms4a19
mmu-miR-139-5p	ENSMUSG00000024732	Ccdc86
mmu-miR-666-3p	ENSMUSG00000024734	Zp1
mmu-miR-409-5p	ENSMUSG00000034117	Ptgdr2
mmu-miR-673-5p	ENSMUSG00000024735	Prpf19
mmu-miR-671-3p	ENSMUSG00000024735	Prpf19
mmu-miR-423-5p	ENSMUSG00000034659	Tmem109
mmu-miR-369-5p	ENSMUSG00000024736	Tmem132a
mmu-miR-331-3p	ENSMUSG00000024736	Tmem132a
mmu-miR-423-5p	ENSMUSG00000067577	A430093F15Rik
mmu-miR-409-5p	ENSMUSG00000024670	Cd6
mmu-miR-369-5p	ENSMUSG00000043789	Vwce
mmu-miR-423-5p	ENSMUSG00000024738	Pga5
mmu-miR-337-5p	ENSMUSG00000024738	Pga5
mmu-miR-188-5p	ENSMUSG00000024738	Pga5
mmu-miR-532-5p	ENSMUSG00000024738	Pga5
mmu-miR-673-5p	ENSMUSG00000024740	Ddb1
mmu-miR-671-3p	ENSMUSG00000024740	Ddb1
mmu-miR-671-5p	ENSMUSG00000024667	Tmem216
mmu-miR-369-5p	ENSMUSG00000024667	Tmem216
mmu-miR-532-5p	ENSMUSG00000024668	Sdhaf2
mmu-miR-409-5p	ENSMUSG00000035179	Saxo4
mmu-miR-671-5p	ENSMUSG00000035735	Dagla
mmu-miR-673-5p	ENSMUSG00000036372	Tmem258
mmu-miR-409-5p	ENSMUSG00000036372	Tmem258
mmu-miR-139-5p	ENSMUSG00000024742	Fen1
mmu-miR-501-3p	ENSMUSG00000024660	Incenp
mmu-miR-337-5p	ENSMUSG00000024660	Incenp
mmu-miR-338-3p	ENSMUSG00000024660	Incenp
mmu-miR-139-3p	ENSMUSG00000024653	Scgb1a1
mmu-miR-423-5p	ENSMUSG00000024653	Scgb1a1
mmu-miR-671-5p	ENSMUSG00000024653	Scgb1a1
mmu-miR-151-5p	ENSMUSG00000024653	Scgb1a1
mmu-miR-188-5p	ENSMUSG00000069833	Ahnak
mmu-miR-139-3p	ENSMUSG00000071644	Eef1g
mmu-miR-337-5p	ENSMUSG00000071644	Eef1g
mmu-miR-188-5p	ENSMUSG00000071644	Eef1g
mmu-miR-188-5p	ENSMUSG00000071646	Mta2
mmu-miR-139-5p	ENSMUSG00000071647	Eml3
mmu-miR-338-3p	ENSMUSG00000071647	Eml3
mmu-miR-423-3p	ENSMUSG00000071649	B3gat3
mmu-miR-673-5p	ENSMUSG00000071649	B3gat3
mmu-miR-409-5p	ENSMUSG00000071649	B3gat3
mmu-miR-671-3p	ENSMUSG00000071649	B3gat3
mmu-miR-501-3p	ENSMUSG00000071653	1810009A15Rik
mmu-miR-139-3p	ENSMUSG00000071655	Ubxn1
mmu-miR-671-3p	ENSMUSG00000071654	Uqcc3
mmu-miR-338-3p	ENSMUSG00000071656	Lrrn4cl
mmu-miR-671-3p	ENSMUSG00000071656	Lrrn4cl
mmu-miR-369-3p	ENSMUSG00000071660	Ttc9c
mmu-miR-151-5p	ENSMUSG00000071662	Polr2g
mmu-miR-423-5p	ENSMUSG00000003680	Taf6l
mmu-miR-409-5p	ENSMUSG00000003680	Taf6l
mmu-miR-139-3p	ENSMUSG00000010097	Nxf1
mmu-miR-139-3p	ENSMUSG00000010110	Stx5a
mmu-miR-666-3p	ENSMUSG00000010110	Stx5a
mmu-miR-296-5p	ENSMUSG00000010110	Stx5a
mmu-miR-188-5p	ENSMUSG00000042729	Wdr74
mmu-miR-671-3p	ENSMUSG00000032773	Chrm1
mmu-miR-338-3p	ENSMUSG00000024761	Gm16437
mmu-miR-423-5p	ENSMUSG00000024973	Plaat5
mmu-miR-151-5p	ENSMUSG00000024973	Plaat5
mmu-miR-423-3p	ENSMUSG00000024759	Atl3
mmu-miR-188-5p	ENSMUSG00000024759	Atl3
mmu-miR-666-3p	ENSMUSG00000024759	Atl3
mmu-miR-671-5p	ENSMUSG00000024969	Mark2
mmu-miR-296-5p	ENSMUSG00000035885	Cox8a
mmu-miR-673-5p	ENSMUSG00000024767	Otub1
mmu-miR-671-5p	ENSMUSG00000024767	Otub1
mmu-miR-151-5p	ENSMUSG00000024767	Otub1
mmu-miR-296-5p	ENSMUSG00000036278	Macrod1
mmu-miR-188-5p	ENSMUSG00000024965	Fermt3
mmu-miR-296-5p	ENSMUSG00000047656	Trpt1
mmu-miR-574-3p	ENSMUSG00000037349	Nudt22
mmu-miR-139-3p	ENSMUSG00000037349	Nudt22
mmu-miR-338-3p	ENSMUSG00000037349	Nudt22
mmu-miR-296-5p	ENSMUSG00000037349	Nudt22
mmu-miR-151-3p	ENSMUSG00000024962	Vegfb
mmu-miR-139-5p	ENSMUSG00000056629	Fkbp2
mmu-miR-666-3p	ENSMUSG00000056612	Ppp1r14b
mmu-miR-331-3p	ENSMUSG00000024960	Plcb3
mmu-miR-501-3p	ENSMUSG00000024959	Bad
mmu-miR-342-3p	ENSMUSG00000024959	Bad
mmu-miR-151-5p	ENSMUSG00000024958	Gpr137
mmu-miR-423-5p	ENSMUSG00000050623	Catsperz
mmu-miR-671-3p	ENSMUSG00000024957	Kcnk4
mmu-miR-671-5p	ENSMUSG00000024957	Kcnk4
mmu-miR-188-5p	ENSMUSG00000024955	Esrra
mmu-miR-337-5p	ENSMUSG00000033768	Nrxn2
mmu-miR-188-5p	ENSMUSG00000033768	Nrxn2
mmu-miR-673-5p	ENSMUSG00000032946	Rasgrp2
mmu-miR-331-3p	ENSMUSG00000032946	Rasgrp2
mmu-miR-673-5p	ENSMUSG00000024948	Map4k2
mmu-miR-671-5p	ENSMUSG00000024769	Cdc42bpg
mmu-miR-423-3p	ENSMUSG00000024772	Ehd1
mmu-miR-574-3p	ENSMUSG00000024773	Atg2a
mmu-miR-501-3p	ENSMUSG00000024773	Atg2a
mmu-miR-423-5p	ENSMUSG00000024777	Ppp2r5b
mmu-miR-331-3p	ENSMUSG00000024777	Ppp2r5b
mmu-miR-151-3p	ENSMUSG00000024777	Ppp2r5b
mmu-miR-151-3p	ENSMUSG00000024786	Majin
mmu-miR-296-5p	ENSMUSG00000024784	Gpha2
mmu-miR-671-3p	ENSMUSG00000039699	Batf2
mmu-miR-342-3p	ENSMUSG00000039699	Batf2
mmu-miR-671-5p	ENSMUSG00000039699	Batf2
mmu-miR-188-5p	ENSMUSG00000024944	Arl2
mmu-miR-666-3p	ENSMUSG00000024944	Arl2
mmu-miR-331-3p	ENSMUSG00000024787	Snx15
mmu-miR-342-3p	ENSMUSG00000024787	Snx15
mmu-miR-331-3p	ENSMUSG00000054999	Naaladl1
mmu-miR-671-3p	ENSMUSG00000024791	Cdca5
mmu-miR-369-5p	ENSMUSG00000024792	Zfpl1
mmu-miR-532-5p	ENSMUSG00000024797	Vps51
mmu-miR-139-5p	ENSMUSG00000038274	Fau
mmu-miR-666-3p	ENSMUSG00000024807	Syvn1
mmu-miR-423-5p	ENSMUSG00000024833	Pola2
mmu-miR-139-5p	ENSMUSG00000024833	Pola2
mmu-miR-409-5p	ENSMUSG00000024833	Pola2
mmu-miR-671-5p	ENSMUSG00000024833	Pola2
mmu-miR-423-3p	ENSMUSG00000037451	Slc22a20
mmu-miR-501-3p	ENSMUSG00000037451	Slc22a20
mmu-miR-331-3p	ENSMUSG00000024826	Dpf2
mmu-miR-296-5p	ENSMUSG00000024826	Dpf2
mmu-miR-139-3p	ENSMUSG00000044390	Tigd3
mmu-miR-151-3p	ENSMUSG00000044390	Tigd3
mmu-miR-151-5p	ENSMUSG00000044390	Tigd3
mmu-miR-671-5p	ENSMUSG00000024818	Slc25a45
mmu-miR-671-3p	ENSMUSG00000024816	Frmd8
mmu-miR-671-5p	ENSMUSG00000024941	Scyl1
mmu-miR-139-5p	ENSMUSG00000024939	Fam89b
mmu-miR-151-3p	ENSMUSG00000024939	Fam89b
mmu-miR-671-3p	ENSMUSG00000079478	Znrd2
mmu-miR-671-5p	ENSMUSG00000079478	Znrd2
mmu-miR-673-5p	ENSMUSG00000024937	Ehbp1l1
mmu-miR-139-3p	ENSMUSG00000024937	Ehbp1l1
mmu-miR-188-5p	ENSMUSG00000024937	Ehbp1l1
mmu-miR-409-5p	ENSMUSG00000024937	Ehbp1l1
mmu-miR-139-3p	ENSMUSG00000004054	Map3k11
mmu-miR-139-5p	ENSMUSG00000004054	Map3k11
mmu-miR-331-3p	ENSMUSG00000004054	Map3k11
mmu-miR-671-3p	ENSMUSG00000004054	Map3k11
mmu-miR-296-5p	ENSMUSG00000004054	Map3k11
mmu-miR-296-5p	ENSMUSG00000054874	Pcnx3
mmu-miR-501-3p	ENSMUSG00000024927	Rela
mmu-miR-409-5p	ENSMUSG00000024927	Rela
mmu-miR-671-3p	ENSMUSG00000024927	Rela
mmu-miR-139-5p	ENSMUSG00000049562	Ap5b1
mmu-miR-151-5p	ENSMUSG00000049562	Ap5b1
mmu-miR-139-3p	ENSMUSG00000056185	Snx32
mmu-miR-423-5p	ENSMUSG00000056185	Snx32
mmu-miR-296-5p	ENSMUSG00000056185	Snx32
mmu-miR-331-3p	ENSMUSG00000024909	Efemp2
mmu-miR-296-5p	ENSMUSG00000024909	Efemp2
mmu-miR-139-3p	ENSMUSG00000024910	Ctsw
mmu-miR-423-5p	ENSMUSG00000024910	Ctsw
mmu-miR-139-5p	ENSMUSG00000024910	Ctsw
mmu-miR-369-5p	ENSMUSG00000024910	Ctsw
mmu-miR-671-5p	ENSMUSG00000024910	Ctsw
mmu-miR-331-3p	ENSMUSG00000024912	Fosl1
mmu-miR-423-5p	ENSMUSG00000024914	Drap1
mmu-miR-574-3p	ENSMUSG00000047423	AI837181
mmu-miR-501-3p	ENSMUSG00000047423	AI837181
mmu-miR-671-5p	ENSMUSG00000047423	AI837181
mmu-miR-296-5p	ENSMUSG00000047423	AI837181
mmu-miR-342-3p	ENSMUSG00000039330	Tsga10ip
mmu-miR-574-3p	ENSMUSG00000024841	Eif1ad
mmu-miR-342-3p	ENSMUSG00000024846	Cst6
mmu-miR-532-5p	ENSMUSG00000047658	Gal3st3
mmu-miR-139-5p	ENSMUSG00000024853	Sf3b2
mmu-miR-409-5p	ENSMUSG00000024855	Pacs1
mmu-miR-296-5p	ENSMUSG00000024855	Pacs1
mmu-miR-423-5p	ENSMUSG00000024862	Klc2
mmu-miR-532-5p	ENSMUSG00000024875	Yif1a
mmu-miR-338-3p	ENSMUSG00000024875	Yif1a
mmu-miR-331-3p	ENSMUSG00000024875	Yif1a
mmu-miR-188-5p	ENSMUSG00000024873	Cnih2
mmu-miR-671-3p	ENSMUSG00000024873	Cnih2
mmu-miR-673-5p	ENSMUSG00000056481	Cd248
mmu-miR-188-5p	ENSMUSG00000056481	Cd248
mmu-miR-338-3p	ENSMUSG00000056481	Cd248
mmu-miR-337-5p	ENSMUSG00000047379	B4gat1
mmu-miR-188-5p	ENSMUSG00000024902	Mrpl11
mmu-miR-331-3p	ENSMUSG00000024902	Mrpl11
mmu-miR-423-5p	ENSMUSG00000024901	Peli3
mmu-miR-337-5p	ENSMUSG00000024901	Peli3
mmu-miR-34b-3p	ENSMUSG00000063904	Dpp3
mmu-miR-342-3p	ENSMUSG00000063904	Dpp3
mmu-miR-151-5p	ENSMUSG00000063904	Dpp3
mmu-miR-673-5p	ENSMUSG00000006457	Actn3
mmu-miR-423-5p	ENSMUSG00000006457	Actn3
mmu-miR-139-5p	ENSMUSG00000034108	Ccs
mmu-miR-666-3p	ENSMUSG00000034108	Ccs
mmu-miR-574-3p	ENSMUSG00000006456	Rbm14
mmu-miR-331-3p	ENSMUSG00000006456	Rbm14
mmu-miR-151-5p	ENSMUSG00000033760	Rbm4b
mmu-miR-671-5p	ENSMUSG00000067889	Sptbn2
mmu-miR-423-5p	ENSMUSG00000071691	Top6bl
mmu-miR-139-5p	ENSMUSG00000071691	Top6bl
mmu-miR-369-5p	ENSMUSG00000071691	Top6bl
mmu-miR-666-3p	ENSMUSG00000071691	Top6bl
mmu-miR-666-3p	ENSMUSG00000045045	Lrfn4
mmu-miR-188-5p	ENSMUSG00000024889	Rce1
mmu-miR-409-5p	ENSMUSG00000024889	Rce1
mmu-miR-151-5p	ENSMUSG00000024889	Rce1
mmu-miR-671-5p	ENSMUSG00000024889	Rce1
mmu-miR-296-5p	ENSMUSG00000024889	Rce1
mmu-miR-673-5p	ENSMUSG00000024892	Pcx
mmu-miR-671-5p	ENSMUSG00000042041	2010003K11Rik
mmu-miR-423-3p	ENSMUSG00000041845	Rhod
mmu-miR-423-5p	ENSMUSG00000041845	Rhod
mmu-miR-369-5p	ENSMUSG00000054611	Kdm2a
mmu-miR-139-3p	ENSMUSG00000024858	Grk2
mmu-miR-296-5p	ENSMUSG00000024858	Grk2
mmu-miR-139-5p	ENSMUSG00000005986	Ankrd13d
mmu-miR-331-3p	ENSMUSG00000034616	Ssh3
mmu-miR-296-5p	ENSMUSG00000034616	Ssh3
mmu-miR-666-3p	ENSMUSG00000034616	Ssh3
mmu-miR-671-5p	ENSMUSG00000040385	Ppp1ca
mmu-miR-666-3p	ENSMUSG00000040385	Ppp1ca
mmu-miR-139-3p	ENSMUSG00000040247	Tbc1d10c
mmu-miR-188-5p	ENSMUSG00000040247	Tbc1d10c
mmu-miR-671-5p	ENSMUSG00000040247	Tbc1d10c
mmu-miR-151-5p	ENSMUSG00000040247	Tbc1d10c
mmu-miR-34b-3p	ENSMUSG00000045826	Ptprcap
mmu-miR-423-3p	ENSMUSG00000045826	Ptprcap
mmu-miR-342-3p	ENSMUSG00000024830	Rps6kb2
mmu-miR-151-5p	ENSMUSG00000024835	Coro1b
mmu-miR-296-5p	ENSMUSG00000024835	Coro1b
mmu-miR-139-3p	ENSMUSG00000024851	Pitpnm1
mmu-miR-139-5p	ENSMUSG00000024851	Pitpnm1
mmu-miR-409-5p	ENSMUSG00000024851	Pitpnm1
mmu-miR-331-3p	ENSMUSG00000024851	Pitpnm1
mmu-miR-296-5p	ENSMUSG00000024851	Pitpnm1
mmu-miR-671-5p	ENSMUSG00000024856	Cdk2ap2
mmu-miR-151-5p	ENSMUSG00000024856	Cdk2ap2
mmu-miR-423-3p	ENSMUSG00000024851	Pitpnm1
mmu-miR-342-3p	ENSMUSG00000024851	Pitpnm1
mmu-miR-139-3p	ENSMUSG00000024871	Doc2g
mmu-miR-673-5p	ENSMUSG00000037477	Tbx10
mmu-miR-139-3p	ENSMUSG00000037477	Tbx10
mmu-miR-151-3p	ENSMUSG00000037477	Tbx10
mmu-miR-188-5p	ENSMUSG00000024885	Aldh3b1
mmu-miR-673-5p	ENSMUSG00000024843	Chka
mmu-miR-666-3p	ENSMUSG00000024843	Chka
mmu-miR-139-5p	ENSMUSG00000045098	Kmt5b
mmu-miR-501-3p	ENSMUSG00000035372	1810055G02Rik
mmu-miR-151-5p	ENSMUSG00000035372	1810055G02Rik
mmu-miR-188-5p	ENSMUSG00000024913	Lrp5
mmu-miR-673-5p	ENSMUSG00000024905	Tesmin
mmu-miR-532-5p	ENSMUSG00000024905	Tesmin
mmu-miR-501-3p	ENSMUSG00000024829	Mrpl21
mmu-miR-337-5p	ENSMUSG00000024829	Mrpl21
mmu-miR-369-3p	ENSMUSG00000024829	Mrpl21
mmu-miR-671-5p	ENSMUSG00000016494	Cd34
mmu-miR-342-3p	ENSMUSG00000026640	Plxna2
mmu-miR-501-3p	ENSMUSG00000016179	Camk1g
mmu-miR-151-5p	ENSMUSG00000016179	Camk1g
mmu-miR-423-3p	ENSMUSG00000026639	Lamb3
mmu-miR-139-3p	ENSMUSG00000026639	Lamb3
mmu-miR-331-3p	ENSMUSG00000026639	Lamb3
mmu-miR-423-3p	ENSMUSG00000009633	G0s2
mmu-miR-188-5p	ENSMUSG00000009633	G0s2
mmu-miR-338-3p	ENSMUSG00000009633	G0s2
mmu-miR-673-5p	ENSMUSG00000016194	Hsd11b1
mmu-miR-342-3p	ENSMUSG00000016181	Utp25
mmu-miR-34b-3p	ENSMUSG00000037395	Rcor3
mmu-miR-423-5p	ENSMUSG00000037395	Rcor3
mmu-miR-188-5p	ENSMUSG00000037395	Rcor3
mmu-miR-139-5p	ENSMUSG00000026622	Nek2
mmu-miR-409-5p	ENSMUSG00000037461	Ints7
mmu-miR-369-3p	ENSMUSG00000037461	Ints7
mmu-miR-666-3p	ENSMUSG00000037499	Nenf
mmu-miR-501-3p	ENSMUSG00000026630	Batf3
mmu-miR-331-3p	ENSMUSG00000026630	Batf3
mmu-miR-409-5p	ENSMUSG00000062510	Nsl1
mmu-miR-338-3p	ENSMUSG00000062510	Nsl1
mmu-miR-139-5p	ENSMUSG00000026634	Angel2
mmu-miR-574-3p	ENSMUSG00000089872	Rps6kc1
mmu-miR-188-5p	ENSMUSG00000089872	Rps6kc1
mmu-miR-423-3p	ENSMUSG00000026603	Smyd2
mmu-miR-369-3p	ENSMUSG00000026604	Ptpn14
mmu-miR-139-5p	ENSMUSG00000037624	Kcnk2
mmu-miR-34b-3p	ENSMUSG00000026609	Ush2a
mmu-miR-673-5p	ENSMUSG00000026609	Ush2a
mmu-miR-369-5p	ENSMUSG00000026609	Ush2a
mmu-miR-151-5p	ENSMUSG00000039210	Gpatch2
mmu-miR-666-3p	ENSMUSG00000039210	Gpatch2
mmu-miR-337-5p	ENSMUSG00000001305	Rrp15
mmu-miR-671-3p	ENSMUSG00000001305	Rrp15
mmu-miR-671-5p	ENSMUSG00000001305	Rrp15
mmu-miR-342-3p	ENSMUSG00000039246	Lyplal1
mmu-miR-532-5p	ENSMUSG00000026618	Iars2
mmu-miR-337-5p	ENSMUSG00000026620	Mark1
mmu-miR-671-3p	ENSMUSG00000073481	Mtarc2
mmu-miR-501-3p	ENSMUSG00000026621	Mtarc1
mmu-miR-188-5p	ENSMUSG00000026621	Mtarc1
mmu-miR-532-5p	ENSMUSG00000039377	Hlx
mmu-miR-671-3p	ENSMUSG00000039377	Hlx
mmu-miR-331-3p	ENSMUSG00000039377	Hlx
mmu-miR-331-3p	ENSMUSG00000038576	Susd4
mmu-miR-369-5p	ENSMUSG00000044854	1700056E22Rik
mmu-miR-532-5p	ENSMUSG00000043429	Ccdc185
mmu-miR-151-5p	ENSMUSG00000043429	Ccdc185
mmu-miR-188-5p	ENSMUSG00000038599	Capn8
mmu-miR-409-5p	ENSMUSG00000026509	Capn2
mmu-miR-337-5p	ENSMUSG00000026511	Srp9
mmu-miR-666-3p	ENSMUSG00000056699	Gm5533
mmu-miR-574-3p	ENSMUSG00000026514	Cnih3
mmu-miR-337-5p	ENSMUSG00000038733	Wdr26
mmu-miR-151-3p	ENSMUSG00000026516	Nvl
mmu-miR-666-3p	ENSMUSG00000026516	Nvl
mmu-miR-673-5p	ENSMUSG00000026519	Tmem63a
mmu-miR-409-5p	ENSMUSG00000026519	Tmem63a
mmu-miR-671-3p	ENSMUSG00000026519	Tmem63a
mmu-miR-296-5p	ENSMUSG00000026519	Tmem63a
mmu-miR-151-3p	ENSMUSG00000038793	Lefty1
mmu-miR-151-5p	ENSMUSG00000038793	Lefty1
mmu-miR-501-3p	ENSMUSG00000066652	Lefty2
mmu-miR-151-3p	ENSMUSG00000026499	Acbd3
mmu-miR-139-3p	ENSMUSG00000010609	Psen2
mmu-miR-139-5p	ENSMUSG00000010609	Psen2
mmu-miR-501-3p	ENSMUSG00000010609	Psen2
mmu-miR-331-3p	ENSMUSG00000121653
mmu-miR-501-3p	ENSMUSG00000026490	Cdc42bpa
mmu-miR-574-3p	ENSMUSG00000026490	Cdc42bpa
mmu-miR-574-3p	ENSMUSG00000038936	Sccpdh
mmu-miR-666-3p	ENSMUSG00000055067	Smyd3
mmu-miR-409-5p	ENSMUSG00000015962	Spmip3
mmu-miR-338-3p	ENSMUSG00000063659	Zbtb18
mmu-miR-151-3p	ENSMUSG00000019699	Akt3
mmu-miR-574-3p	ENSMUSG00000057335	Cep170
mmu-miR-409-5p	ENSMUSG00000026523	Wdr64
mmu-miR-671-3p	ENSMUSG00000026523	Wdr64
mmu-miR-331-3p	ENSMUSG00000026523	Wdr64
mmu-miR-139-5p	ENSMUSG00000039783	Kmo
mmu-miR-188-5p	ENSMUSG00000039783	Kmo
mmu-miR-151-3p	ENSMUSG00000039783	Kmo
mmu-miR-342-3p	ENSMUSG00000026526	Fh1
mmu-miR-423-5p	ENSMUSG00000050788	Or10z1
mmu-miR-139-5p	ENSMUSG00000050788	Or10z1
mmu-miR-338-3p	ENSMUSG00000050788	Or10z1
mmu-miR-409-5p	ENSMUSG00000026532	Spta1
mmu-miR-338-3p	ENSMUSG00000055033	Or6k2
mmu-miR-188-5p	ENSMUSG00000047048	Or10aa3
mmu-miR-501-3p	ENSMUSG00000045381	Or10aa1
mmu-miR-574-3p	ENSMUSG00000073491	Ifi213
mmu-miR-423-5p	ENSMUSG00000005338	Cadm3
mmu-miR-501-3p	ENSMUSG00000005338	Cadm3
mmu-miR-331-3p	ENSMUSG00000005338	Cadm3
mmu-miR-671-5p	ENSMUSG00000005338	Cadm3
mmu-miR-296-5p	ENSMUSG00000005338	Cadm3
mmu-miR-574-3p	ENSMUSG00000037872	Ackr1
mmu-miR-666-3p	ENSMUSG00000005339	Fcer1a
mmu-miR-673-5p	ENSMUSG00000058981	Or10j7
mmu-miR-188-5p	ENSMUSG00000058981	Or10j7
mmu-miR-409-5p	ENSMUSG00000058981	Or10j7
mmu-miR-409-5p	ENSMUSG00000037942	Crp
mmu-miR-139-3p	ENSMUSG00000026544	Dusp23
mmu-miR-337-5p	ENSMUSG00000026544	Dusp23
mmu-miR-532-5p	ENSMUSG00000053318	Slamf8
mmu-miR-151-5p	ENSMUSG00000053318	Slamf8
mmu-miR-423-3p	ENSMUSG00000049598	Vsig8
mmu-miR-331-3p	ENSMUSG00000049598	Vsig8
mmu-miR-342-3p	ENSMUSG00000049598	Vsig8
mmu-miR-671-5p	ENSMUSG00000049598	Vsig8
mmu-miR-296-5p	ENSMUSG00000049598	Vsig8
mmu-miR-151-3p	ENSMUSG00000026546	Cfap45
mmu-miR-342-3p	ENSMUSG00000026546	Cfap45
mmu-miR-151-5p	ENSMUSG00000026546	Cfap45
mmu-miR-574-3p	ENSMUSG00000037995	Igsf9
mmu-miR-423-5p	ENSMUSG00000037995	Igsf9
mmu-miR-501-3p	ENSMUSG00000037995	Igsf9
mmu-miR-342-3p	ENSMUSG00000037995	Igsf9
mmu-miR-151-5p	ENSMUSG00000026548	Slamf9
mmu-miR-673-5p	ENSMUSG00000007097	Atp1a2
mmu-miR-337-5p	ENSMUSG00000038034	Igsf8
mmu-miR-151-5p	ENSMUSG00000007122	Casq1
mmu-miR-34b-3p	ENSMUSG00000003464	Pex19
mmu-miR-338-3p	ENSMUSG00000026553	Copa
mmu-miR-337-5p	ENSMUSG00000003458	Ncstn
mmu-miR-501-3p	ENSMUSG00000051251	Nhlh1
mmu-miR-532-5p	ENSMUSG00000038209	Itln1
mmu-miR-423-3p	ENSMUSG00000060244	Alyref2
mmu-miR-337-5p	ENSMUSG00000060244	Alyref2
mmu-miR-671-3p	ENSMUSG00000060244	Alyref2
mmu-miR-501-3p	ENSMUSG00000038235	F11r
mmu-miR-139-5p	ENSMUSG00000026641	Usf1
mmu-miR-296-5p	ENSMUSG00000026641	Usf1
mmu-miR-139-5p	ENSMUSG00000048865	Arhgap30
mmu-miR-337-5p	ENSMUSG00000006412	Pfdn2
mmu-miR-423-3p	ENSMUSG00000013973	Dedd
mmu-miR-673-5p	ENSMUSG00000013973	Dedd
mmu-miR-501-3p	ENSMUSG00000013973	Dedd
mmu-miR-188-5p	ENSMUSG00000013973	Dedd
mmu-miR-671-5p	ENSMUSG00000013973	Dedd
mmu-miR-139-5p	ENSMUSG00000053483	Usp21
mmu-miR-666-3p	ENSMUSG00000053483	Usp21
mmu-miR-423-5p	ENSMUSG00000052423	B4galt3
mmu-miR-188-5p	ENSMUSG00000052423	B4galt3
mmu-miR-151-5p	ENSMUSG00000052423	B4galt3
mmu-miR-574-3p	ENSMUSG00000013593	Ndufs2
mmu-miR-342-3p	ENSMUSG00000013593	Ndufs2
mmu-miR-139-3p	ENSMUSG00000058715	Fcer1g
mmu-miR-501-3p	ENSMUSG00000058715	Fcer1g
mmu-miR-188-5p	ENSMUSG00000058715	Fcer1g
mmu-miR-337-5p	ENSMUSG00000005677	Nr1i3
mmu-miR-423-5p	ENSMUSG00000058076	Sdhc
mmu-miR-532-5p	ENSMUSG00000026649	Cfap126
mmu-miR-338-3p	ENSMUSG00000026649	Cfap126
mmu-miR-151-3p	ENSMUSG00000026649	Cfap126
mmu-miR-139-3p	ENSMUSG00000026656	Fcgr2b
mmu-miR-139-5p	ENSMUSG00000026656	Fcgr2b
mmu-miR-501-3p	ENSMUSG00000026656	Fcgr2b
mmu-miR-188-5p	ENSMUSG00000026656	Fcgr2b
mmu-miR-673-5p	ENSMUSG00000026659	Dusp12
mmu-miR-409-5p	ENSMUSG00000026659	Dusp12
mmu-miR-338-3p	ENSMUSG00000026659	Dusp12
mmu-miR-139-5p	ENSMUSG00000038463	Olfml2b
mmu-miR-139-5p	ENSMUSG00000026667	Uhmk1
mmu-miR-423-5p	ENSMUSG00000026674	Ddr2
mmu-miR-369-3p	ENSMUSG00000026683	Nuf2
mmu-miR-151-3p	ENSMUSG00000052534	Pbx1
mmu-miR-673-5p	ENSMUSG00000026686	Lmx1a
mmu-miR-574-3p	ENSMUSG00000015843	Rxrg
mmu-miR-501-3p	ENSMUSG00000015843	Rxrg
mmu-miR-409-5p	ENSMUSG00000015843	Rxrg
mmu-miR-188-5p	ENSMUSG00000015843	Rxrg
mmu-miR-666-3p	ENSMUSG00000015843	Rxrg
mmu-miR-409-5p	ENSMUSG00000026687	Aldh9a1
mmu-miR-151-3p	ENSMUSG00000026687	Aldh9a1
mmu-miR-34b-3p	ENSMUSG00000026558	Uck2
mmu-miR-423-5p	ENSMUSG00000026558	Uck2
mmu-miR-409-5p	ENSMUSG00000026558	Uck2
mmu-miR-532-5p	ENSMUSG00000026563	Tada1
mmu-miR-409-5p	ENSMUSG00000026563	Tada1
mmu-miR-338-3p	ENSMUSG00000026564	Styxl2
mmu-miR-151-5p	ENSMUSG00000026564	Styxl2
mmu-miR-666-3p	ENSMUSG00000026565	Pou2f1
mmu-miR-673-5p	ENSMUSG00000026565	Pou2f1
mmu-miR-671-5p	ENSMUSG00000026565	Pou2f1
mmu-miR-423-5p	ENSMUSG00000005763	Cd247
mmu-miR-574-3p	ENSMUSG00000040713	Creg1
mmu-miR-337-5p	ENSMUSG00000040713	Creg1
mmu-miR-34b-3p	ENSMUSG00000040723	Rcsd1
mmu-miR-337-5p	ENSMUSG00000026566	Mpzl1
mmu-miR-574-3p	ENSMUSG00000026571	Dcaf6
mmu-miR-151-5p	ENSMUSG00000026571	Dcaf6
mmu-miR-666-3p	ENSMUSG00000040848	Sft2d2
mmu-miR-369-3p	ENSMUSG00000026573	Xcl1
mmu-miR-501-3p	ENSMUSG00000026572	Tbx19
mmu-miR-423-3p	ENSMUSG00000026574	Dpt
mmu-miR-34b-3p	ENSMUSG00000026576	Atp1b1
mmu-miR-34b-3p	ENSMUSG00000026578	Ccdc181
mmu-miR-139-3p	ENSMUSG00000026578	Ccdc181
mmu-miR-338-3p	ENSMUSG00000026578	Ccdc181
mmu-miR-369-3p	ENSMUSG00000026578	Ccdc181
mmu-miR-331-3p	ENSMUSG00000026578	Ccdc181
mmu-miR-296-5p	ENSMUSG00000026578	Ccdc181
mmu-miR-574-3p	ENSMUSG00000026579	F5
mmu-miR-139-3p	ENSMUSG00000041396	Mettl18
mmu-miR-342-3p	ENSMUSG00000041396	Mettl18
mmu-miR-501-3p	ENSMUSG00000041406	Firrm
mmu-miR-151-3p	ENSMUSG00000041406	Firrm
mmu-miR-342-3p	ENSMUSG00000026584	Scyl3
mmu-miR-501-3p	ENSMUSG00000040124	Gorab
mmu-miR-151-3p	ENSMUSG00000071890	Mroh9
mmu-miR-369-5p	ENSMUSG00000026691	Fmo3
mmu-miR-369-3p	ENSMUSG00000040181	Fmo1
mmu-miR-151-3p	ENSMUSG00000040181	Fmo1
mmu-miR-501-3p	ENSMUSG00000026697	Myoc
mmu-miR-369-3p	ENSMUSG00000026697	Myoc
mmu-miR-331-3p	ENSMUSG00000026697	Myoc
mmu-miR-151-5p	ENSMUSG00000026697	Myoc
mmu-miR-369-5p	ENSMUSG00000026698	Pigc
mmu-miR-34b-3p	ENSMUSG00000053332	Gas5
mmu-miR-423-3p	ENSMUSG00000053332	Gas5
mmu-miR-532-5p	ENSMUSG00000053332	Gas5
mmu-miR-369-3p	ENSMUSG00000053332	Gas5
mmu-miR-501-3p	ENSMUSG00000026715	Serpinc1
mmu-miR-671-3p	ENSMUSG00000040423	Rc3h1
mmu-miR-673-5p	ENSMUSG00000057499	Gm6177
mmu-miR-671-5p	ENSMUSG00000057499	Gm6177
mmu-miR-369-5p	ENSMUSG00000014226	Cacybp
mmu-miR-369-5p	ENSMUSG00000061992	Gm4953
mmu-miR-338-3p	ENSMUSG00000026589	Sec16b
mmu-miR-34b-3p	ENSMUSG00000033488	Cryzl2
mmu-miR-139-5p	ENSMUSG00000033488	Cryzl2
mmu-miR-532-5p	ENSMUSG00000033488	Cryzl2
mmu-miR-151-3p	ENSMUSG00000033488	Cryzl2
mmu-miR-151-5p	ENSMUSG00000033488	Cryzl2
mmu-miR-337-5p	ENSMUSG00000070565	Rasal2
mmu-miR-671-5p	ENSMUSG00000026592	Tex35
mmu-miR-139-5p	ENSMUSG00000063889	Crem
mmu-miR-338-3p	ENSMUSG00000063889	Crem
mmu-miR-331-3p	ENSMUSG00000063889	Crem
mmu-miR-151-3p	ENSMUSG00000063889	Crem
mmu-miR-574-3p	ENSMUSG00000024231	Cul2
mmu-miR-673-5p	ENSMUSG00000024231	Cul2
mmu-miR-501-3p	ENSMUSG00000024231	Cul2
mmu-miR-337-5p	ENSMUSG00000024231	Cul2
mmu-miR-423-5p	ENSMUSG00000024233	Lyzl1
mmu-miR-409-5p	ENSMUSG00000024233	Lyzl1
mmu-miR-671-3p	ENSMUSG00000024233	Lyzl1
mmu-miR-139-5p	ENSMUSG00000024235	Map3k8
mmu-miR-369-5p	ENSMUSG00000024234	Mtpap
mmu-miR-673-5p	ENSMUSG00000033960	Jcad
mmu-miR-342-3p	ENSMUSG00000033960	Jcad
mmu-miR-338-3p	ENSMUSG00000024236	Svil
mmu-miR-666-3p	ENSMUSG00000024236	Svil
mmu-miR-501-3p	ENSMUSG00000050945	Zfp438
mmu-miR-574-3p	ENSMUSG00000041225	Arhgap12
mmu-miR-532-5p	ENSMUSG00000073640	Rpl27-ps3
mmu-miR-673-5p	ENSMUSG00000024240	Epc1
mmu-miR-139-5p	ENSMUSG00000024240	Epc1
mmu-miR-423-5p	ENSMUSG00000036904	Fzd8
mmu-miR-34b-3p	ENSMUSG00000050996	Cetn1
mmu-miR-369-3p	ENSMUSG00000047879	Usp14
mmu-miR-423-3p	ENSMUSG00000024290	Rock1
mmu-miR-34b-3p	ENSMUSG00000002477	Snrpd1
mmu-miR-139-5p	ENSMUSG00000002475	Abhd3
mmu-miR-369-3p	ENSMUSG00000005836	Gata6
mmu-miR-337-5p	ENSMUSG00000049411	Tmem241
mmu-miR-574-3p	ENSMUSG00000024404	Riok3
mmu-miR-423-5p	ENSMUSG00000024424	Ttc39c
mmu-miR-369-3p	ENSMUSG00000024424	Ttc39c
mmu-miR-139-3p	ENSMUSG00000024430	Cabyr
mmu-miR-337-5p	ENSMUSG00000024430	Cabyr
mmu-miR-532-5p	ENSMUSG00000044252	Osbpl1a
mmu-miR-139-3p	ENSMUSG00000037346	Hrh4
mmu-miR-139-5p	ENSMUSG00000024420	Zfp521
mmu-miR-532-5p	ENSMUSG00000024420	Zfp521
mmu-miR-666-3p	ENSMUSG00000053740	Gm6457
mmu-miR-139-5p	ENSMUSG00000036743	Psma8
mmu-miR-369-5p	ENSMUSG00000024411	Aqp4
mmu-miR-338-3p	ENSMUSG00000047161	Chst9
mmu-miR-139-5p	ENSMUSG00000046440	Gm5564
mmu-miR-338-3p	ENSMUSG00000063628	Gm7665
mmu-miR-369-3p	ENSMUSG00000024304	Cdh2
mmu-miR-34b-3p	ENSMUSG00000024331	Dsc2
mmu-miR-34b-3p	ENSMUSG00000044322	Dsc1
mmu-miR-338-3p	ENSMUSG00000034774	Dsg1c
mmu-miR-369-3p	ENSMUSG00000069441	Dsg1a
mmu-miR-532-5p	ENSMUSG00000061928	Dsg1b
mmu-miR-139-5p	ENSMUSG00000001804	Dsg4
mmu-miR-369-3p	ENSMUSG00000056632	Dsg3
mmu-miR-532-5p	ENSMUSG00000061808	Ttr
mmu-miR-34b-3p	ENSMUSG00000069439	Gm8444
mmu-miR-532-5p	ENSMUSG00000069439	Gm8444
mmu-miR-423-3p	ENSMUSG00000041923	Nol4
mmu-miR-501-3p	ENSMUSG00000041923	Nol4
mmu-miR-409-5p	ENSMUSG00000041923	Nol4
mmu-miR-671-3p	ENSMUSG00000000420	Galnt1
mmu-miR-673-5p	ENSMUSG00000024273	2700062C07Rik
mmu-miR-151-3p	ENSMUSG00000024273	2700062C07Rik
mmu-miR-151-5p	ENSMUSG00000024273	2700062C07Rik
mmu-miR-666-3p	ENSMUSG00000024273	2700062C07Rik
mmu-miR-139-5p	ENSMUSG00000024270	Slc39a6
mmu-miR-369-3p	ENSMUSG00000039616	Mocos
mmu-miR-337-5p	ENSMUSG00000034295	Fhod3
mmu-miR-369-3p	ENSMUSG00000033632	AW554918
mmu-miR-331-3p	ENSMUSG00000033632	AW554918
mmu-miR-342-3p	ENSMUSG00000033632	AW554918
mmu-miR-423-3p	ENSMUSG00000024268	Celf4
mmu-miR-34b-3p	ENSMUSG00000046636	Gm7729
mmu-miR-423-3p	ENSMUSG00000055771	Gm7936
mmu-miR-423-5p	ENSMUSG00000055771	Gm7936
mmu-miR-369-3p	ENSMUSG00000055771	Gm7936
mmu-miR-369-3p	ENSMUSG00000057455	Rit2
mmu-miR-338-3p	ENSMUSG00000024258	Polr2d
mmu-miR-342-3p	ENSMUSG00000024258	Polr2d
mmu-miR-151-5p	ENSMUSG00000024258	Polr2d
mmu-miR-671-5p	ENSMUSG00000024258	Polr2d
mmu-miR-342-3p	ENSMUSG00000024400	Wdr33
mmu-miR-501-3p	ENSMUSG00000024400	Wdr33
mmu-miR-409-5p	ENSMUSG00000024400	Wdr33
mmu-miR-139-3p	ENSMUSG00000024382	Ercc3
mmu-miR-342-3p	ENSMUSG00000024382	Ercc3
mmu-miR-423-3p	ENSMUSG00000024381	Bin1
mmu-miR-331-3p	ENSMUSG00000024381	Bin1
mmu-miR-188-5p	ENSMUSG00000024379	Tslp
mmu-miR-423-3p	ENSMUSG00000014504	Srp19
mmu-miR-673-5p	ENSMUSG00000014504	Srp19
mmu-miR-501-3p	ENSMUSG00000012282	Wnt8a
mmu-miR-671-3p	ENSMUSG00000012282	Wnt8a
mmu-miR-331-3p	ENSMUSG00000012282	Wnt8a
mmu-miR-574-3p	ENSMUSG00000035984	Nme5
mmu-miR-501-3p	ENSMUSG00000035984	Nme5
mmu-miR-342-3p	ENSMUSG00000035984	Nme5
mmu-miR-151-5p	ENSMUSG00000035984	Nme5
mmu-miR-673-5p	ENSMUSG00000024366	Gfra3
mmu-miR-139-3p	ENSMUSG00000038773	Kdm3b
mmu-miR-188-5p	ENSMUSG00000038555	Reep2
mmu-miR-666-3p	ENSMUSG00000038555	Reep2
mmu-miR-423-3p	ENSMUSG00000024359	Hspa9
mmu-miR-338-3p	ENSMUSG00000024359	Hspa9
mmu-miR-34b-3p	ENSMUSG00000024357	Sil1
mmu-miR-574-3p	ENSMUSG00000024357	Sil1
mmu-miR-331-3p	ENSMUSG00000024357	Sil1
mmu-miR-671-3p	ENSMUSG00000024357	Sil1
mmu-miR-34b-3p	ENSMUSG00000062742	Gm5239
mmu-miR-139-3p	ENSMUSG00000062742	Gm5239
mmu-miR-139-5p	ENSMUSG00000062742	Gm5239
mmu-miR-501-3p	ENSMUSG00000037058	Paip2
mmu-miR-188-5p	ENSMUSG00000073600	Prob1
mmu-miR-151-3p	ENSMUSG00000073600	Prob1
mmu-miR-34b-3p	ENSMUSG00000024350	Dnajc18
mmu-miR-342-3p	ENSMUSG00000024350	Dnajc18
mmu-miR-666-3p	ENSMUSG00000024350	Dnajc18
mmu-miR-342-3p	ENSMUSG00000073598	Smim33
mmu-miR-671-5p	ENSMUSG00000073598	Smim33
mmu-miR-188-5p	ENSMUSG00000046668	Cxxc5
mmu-miR-331-3p	ENSMUSG00000046668	Cxxc5
mmu-miR-34b-3p	ENSMUSG00000046727	Cystm1
mmu-miR-532-5p	ENSMUSG00000046727	Cystm1
mmu-miR-423-5p	ENSMUSG00000024346	Pfdn1
mmu-miR-671-5p	ENSMUSG00000024486	Hbegf
mmu-miR-666-3p	ENSMUSG00000024485	Slc4a9
mmu-miR-409-5p	ENSMUSG00000024483	Ankhd1
mmu-miR-532-5p	ENSMUSG00000090264	Eif4ebp3
mmu-miR-671-5p	ENSMUSG00000090264	Eif4ebp3
mmu-miR-423-5p	ENSMUSG00000117679	Apbb3
mmu-miR-139-5p	ENSMUSG00000117679	Apbb3
mmu-miR-151-3p	ENSMUSG00000033272	Slc35a4
mmu-miR-151-5p	ENSMUSG00000051439	Cd14
mmu-miR-574-3p	ENSMUSG00000006850	Tmco6
mmu-miR-423-5p	ENSMUSG00000006850	Tmco6
mmu-miR-342-3p	ENSMUSG00000014294	Ndufa2
mmu-miR-338-3p	ENSMUSG00000042660	Wdr55
mmu-miR-369-5p	ENSMUSG00000042660	Wdr55
mmu-miR-673-5p	ENSMUSG00000044595	Dnd1
mmu-miR-671-3p	ENSMUSG00000044595	Dnd1
mmu-miR-369-5p	ENSMUSG00000001380	Hars1
mmu-miR-342-3p	ENSMUSG00000001383	Zmat2
mmu-miR-423-3p	ENSMUSG00000051599	Pcdhb2
mmu-miR-532-5p	ENSMUSG00000045498	Pcdhb3
mmu-miR-34b-3p	ENSMUSG00000044043	Pcdhb14
mmu-miR-369-5p	ENSMUSG00000044022	Pcdhb21
mmu-miR-369-5p	ENSMUSG00000050304	Slc25a2
mmu-miR-188-5p	ENSMUSG00000024456	Diaph1
mmu-miR-423-5p	ENSMUSG00000024454	Hdac3
mmu-miR-423-5p	ENSMUSG00000044024	Rell2
mmu-miR-151-3p	ENSMUSG00000044024	Rell2
mmu-miR-331-3p	ENSMUSG00000044024	Rell2
mmu-miR-139-5p	ENSMUSG00000044024	Rell2
mmu-miR-369-3p	ENSMUSG00000051375	Pcdh1
mmu-miR-151-3p	ENSMUSG00000024442	Dele1
mmu-miR-369-3p	ENSMUSG00000024425	Ndfip1
mmu-miR-501-3p	ENSMUSG00000024431	Nr3c1
mmu-miR-139-3p	ENSMUSG00000051401	Kctd16
mmu-miR-574-3p	ENSMUSG00000051401	Kctd16
mmu-miR-369-3p	ENSMUSG00000096699	Rps19-ps4
mmu-miR-151-5p	ENSMUSG00000096699	Rps19-ps4
mmu-miR-423-5p	ENSMUSG00000073574	Grxcr2
mmu-miR-666-3p	ENSMUSG00000073574	Grxcr2
mmu-miR-574-3p	ENSMUSG00000034339	Cstdc7
mmu-miR-338-3p	ENSMUSG00000024491	Rbm27
mmu-miR-666-3p	ENSMUSG00000024497	Pou4f3
mmu-miR-34b-3p	ENSMUSG00000024498	Tcerg1
mmu-miR-423-3p	ENSMUSG00000042816	Gpr151
mmu-miR-671-5p	ENSMUSG00000024500	Ppp2r2b
mmu-miR-342-3p	ENSMUSG00000048188	Gm8181
mmu-miR-34b-3p	ENSMUSG00000024502	Jakmip2
mmu-miR-409-5p	ENSMUSG00000071858	Gm94
mmu-miR-671-5p	ENSMUSG00000071858	Gm94
mmu-miR-532-5p	ENSMUSG00000055561	Spink5
mmu-miR-369-3p	ENSMUSG00000055561	Spink5
mmu-miR-139-3p	ENSMUSG00000024472	Dcp2
mmu-miR-139-5p	ENSMUSG00000024472	Dcp2
mmu-miR-342-3p	ENSMUSG00000024472	Dcp2
mmu-miR-139-3p	ENSMUSG00000071856	Mcc
mmu-miR-139-5p	ENSMUSG00000071856	Mcc
mmu-miR-34b-3p	ENSMUSG00000024477	Pggt1b
mmu-miR-34b-3p	ENSMUSG00000071855	Ccdc112
mmu-miR-423-5p	ENSMUSG00000033022	Cdo1
mmu-miR-532-5p	ENSMUSG00000032905	Atg12
mmu-miR-532-5p	ENSMUSG00000024480	Ap3s1
mmu-miR-34b-3p	ENSMUSG00000024481	Lvrn
mmu-miR-342-3p	ENSMUSG00000073568	Arl14epl
mmu-miR-139-3p	ENSMUSG00000019647	Sema6a
mmu-miR-671-3p	ENSMUSG00000059040	Eno1b
mmu-miR-369-5p	ENSMUSG00000024510	Ftmt
mmu-miR-671-5p	ENSMUSG00000024510	Ftmt
mmu-miR-139-5p	ENSMUSG00000024528	Srfbp1
mmu-miR-139-5p	ENSMUSG00000024529	Lox
mmu-miR-673-5p	ENSMUSG00000053624	Gykl1
mmu-miR-423-5p	ENSMUSG00000053624	Gykl1
mmu-miR-409-5p	ENSMUSG00000053624	Gykl1
mmu-miR-139-5p	ENSMUSG00000024534	Sncaip
mmu-miR-666-3p	ENSMUSG00000024534	Sncaip
mmu-miR-139-5p	ENSMUSG00000034484	Snx2
mmu-miR-369-3p	ENSMUSG00000024535	Snx24
mmu-miR-331-3p	ENSMUSG00000024535	Snx24
mmu-miR-337-5p	ENSMUSG00000053644	Aldh7a1
mmu-miR-139-3p	ENSMUSG00000008301	Phax
mmu-miR-673-5p	ENSMUSG00000008301	Phax
mmu-miR-337-5p	ENSMUSG00000008301	Phax
mmu-miR-342-3p	ENSMUSG00000008301	Phax
mmu-miR-151-3p	ENSMUSG00000032900	Spmip10
mmu-miR-369-5p	ENSMUSG00000024590	Lmnb1
mmu-miR-296-5p	ENSMUSG00000024590	Lmnb1
mmu-miR-139-5p	ENSMUSG00000024592	C330018D20Rik
mmu-miR-188-5p	ENSMUSG00000024592	C330018D20Rik
mmu-miR-671-5p	ENSMUSG00000024594	Prrc1
mmu-miR-151-5p	ENSMUSG00000024600	Slc27a6
mmu-miR-666-3p	ENSMUSG00000024600	Slc27a6
mmu-miR-139-3p	ENSMUSG00000024601	Isoc1
mmu-miR-369-3p	ENSMUSG00000053441	Adamts19
mmu-miR-574-3p	ENSMUSG00000050875	Minar2
mmu-miR-151-5p	ENSMUSG00000068606	Gm4841
mmu-miR-423-3p	ENSMUSG00000038059	Smim3
mmu-miR-423-5p	ENSMUSG00000038059	Smim3
mmu-miR-139-5p	ENSMUSG00000024604	Rbm22
mmu-miR-409-5p	ENSMUSG00000024608	Rps14
mmu-miR-139-3p	ENSMUSG00000024610	Cd74
mmu-miR-188-5p	ENSMUSG00000024610	Cd74
mmu-miR-296-5p	ENSMUSG00000024610	Cd74
mmu-miR-673-5p	ENSMUSG00000036412	Arsi
mmu-miR-501-3p	ENSMUSG00000024617	Camk2a
mmu-miR-139-5p	ENSMUSG00000052026	Slc6a7
mmu-miR-337-5p	ENSMUSG00000052026	Slc6a7
mmu-miR-188-5p	ENSMUSG00000052026	Slc6a7
mmu-miR-423-3p	ENSMUSG00000024620	Pdgfrb
mmu-miR-423-3p	ENSMUSG00000024621	Csf1r
mmu-miR-151-5p	ENSMUSG00000024621	Csf1r
mmu-miR-673-5p	ENSMUSG00000024575	Pde6a
mmu-miR-151-3p	ENSMUSG00000024575	Pde6a
mmu-miR-139-3p	ENSMUSG00000033871	Ppargc1b
mmu-miR-423-5p	ENSMUSG00000033871	Ppargc1b
mmu-miR-337-5p	ENSMUSG00000033871	Ppargc1b
mmu-miR-337-5p	ENSMUSG00000024578	Il17b
mmu-miR-331-3p	ENSMUSG00000024579	Pcyox1l
mmu-miR-369-5p	ENSMUSG00000024579	Pcyox1l
mmu-miR-671-5p	ENSMUSG00000024579	Pcyox1l
mmu-miR-671-3p	ENSMUSG00000032735	Ablim3
mmu-miR-151-5p	ENSMUSG00000032735	Ablim3
mmu-miR-331-3p	ENSMUSG00000045629	Sh3tc2
mmu-miR-188-5p	ENSMUSG00000118370	Gm41750
mmu-miR-532-5p	ENSMUSG00000118370	Gm41750
mmu-miR-423-3p	ENSMUSG00000042211	Fbxo38
mmu-miR-423-5p	ENSMUSG00000042211	Fbxo38
mmu-miR-151-3p	ENSMUSG00000042211	Fbxo38
mmu-miR-409-5p	ENSMUSG00000044176	Spink10
mmu-miR-671-3p	ENSMUSG00000041482	Piezo2
mmu-miR-574-3p	ENSMUSG00000024583	Txnl1
mmu-miR-574-3p	ENSMUSG00000056812	St8sia3
mmu-miR-501-3p	ENSMUSG00000056812	St8sia3
mmu-miR-671-3p	ENSMUSG00000024589	Nedd4l
mmu-miR-338-3p	ENSMUSG00000032845	Alpk2
mmu-miR-666-3p	ENSMUSG00000032845	Alpk2
mmu-miR-151-5p	ENSMUSG00000024517	Grp
mmu-miR-369-5p	ENSMUSG00000024519	Cplx4
mmu-miR-532-5p	ENSMUSG00000024524	Gnal
mmu-miR-34b-3p	ENSMUSG00000062526	Mppe1
mmu-miR-338-3p	ENSMUSG00000062526	Mppe1
mmu-miR-501-3p	ENSMUSG00000024525	Impa2
mmu-miR-188-5p	ENSMUSG00000024525	Impa2
mmu-miR-151-3p	ENSMUSG00000024525	Impa2
mmu-miR-188-5p	ENSMUSG00000024526	Cidea
mmu-miR-331-3p	ENSMUSG00000024526	Cidea
mmu-miR-296-5p	ENSMUSG00000024526	Cidea
mmu-miR-423-3p	ENSMUSG00000001473	Tubb6
mmu-miR-423-5p	ENSMUSG00000001473	Tubb6
mmu-miR-151-3p	ENSMUSG00000001473	Tubb6
mmu-miR-673-5p	ENSMUSG00000024527	Afg3l2
mmu-miR-188-5p	ENSMUSG00000024527	Afg3l2
mmu-miR-369-3p	ENSMUSG00000024527	Afg3l2
mmu-miR-671-3p	ENSMUSG00000024527	Afg3l2
mmu-miR-151-3p	ENSMUSG00000024527	Afg3l2
mmu-miR-671-5p	ENSMUSG00000024527	Afg3l2
mmu-miR-666-3p	ENSMUSG00000024527	Afg3l2
mmu-miR-342-3p	ENSMUSG00000024530	Prelid3a
mmu-miR-501-3p	ENSMUSG00000024539	Ptpn2
mmu-miR-188-5p	ENSMUSG00000024539	Ptpn2
mmu-miR-501-3p	ENSMUSG00000024542	Cep192
mmu-miR-337-5p	ENSMUSG00000024542	Cep192
mmu-miR-673-5p	ENSMUSG00000009535	Rnmt
mmu-miR-532-5p	ENSMUSG00000009535	Rnmt
mmu-miR-342-3p	ENSMUSG00000009535	Rnmt
mmu-miR-409-5p	ENSMUSG00000045569	Mc2r
mmu-miR-34b-3p	ENSMUSG00000024546	4930546C10Rik
mmu-miR-369-3p	ENSMUSG00000024512	Dynap
mmu-miR-423-3p	ENSMUSG00000044906	4930503L19Rik
mmu-miR-501-3p	ENSMUSG00000024513	Mbd2
mmu-miR-409-5p	ENSMUSG00000024513	Mbd2
mmu-miR-151-3p	ENSMUSG00000024513	Mbd2
mmu-miR-188-5p	ENSMUSG00000037253	Mex3c
mmu-miR-409-5p	ENSMUSG00000037253	Mex3c
mmu-miR-338-3p	ENSMUSG00000024556	Me2
mmu-miR-423-3p	ENSMUSG00000024558	Mapk4
mmu-miR-671-5p	ENSMUSG00000024560	Cxxc1
mmu-miR-666-3p	ENSMUSG00000025885	Myo5b
mmu-miR-501-3p	ENSMUSG00000036299	BC031181
mmu-miR-337-5p	ENSMUSG00000036299	BC031181
mmu-miR-342-3p	ENSMUSG00000036299	BC031181
mmu-miR-337-5p	ENSMUSG00000035765	Dym
mmu-miR-369-3p	ENSMUSG00000025880	Smad7
mmu-miR-423-5p	ENSMUSG00000024563	Smad2
mmu-miR-337-5p	ENSMUSG00000024563	Smad2
mmu-miR-369-3p	ENSMUSG00000025421	Hdhd2
mmu-miR-501-3p	ENSMUSG00000073532	Gm7276
mmu-miR-337-5p	ENSMUSG00000073532	Gm7276
mmu-miR-574-3p	ENSMUSG00000025425	St8sia5
mmu-miR-342-3p	ENSMUSG00000025425	St8sia5
mmu-miR-673-5p	ENSMUSG00000032818	Loxhd1
mmu-miR-139-3p	ENSMUSG00000041840	Haus1
mmu-miR-331-3p	ENSMUSG00000041840	Haus1
mmu-miR-342-3p	ENSMUSG00000025428	Atp5f1a
mmu-miR-337-5p	ENSMUSG00000024571	Naa12
mmu-miR-671-5p	ENSMUSG00000024571	Naa12
mmu-miR-151-5p	ENSMUSG00000034006	Slc66a2
mmu-miR-574-3p	ENSMUSG00000033323	Ctdp1
mmu-miR-342-3p	ENSMUSG00000033323	Ctdp1
mmu-miR-666-3p	ENSMUSG00000033323	Ctdp1
mmu-miR-369-5p	ENSMUSG00000033016	Nfatc1
mmu-miR-151-5p	ENSMUSG00000033016	Nfatc1
mmu-miR-666-3p	ENSMUSG00000033016	Nfatc1
mmu-miR-34b-3p	ENSMUSG00000024553	Galr1
mmu-miR-671-3p	ENSMUSG00000024553	Galr1
mmu-miR-151-3p	ENSMUSG00000024553	Galr1
mmu-miR-151-5p	ENSMUSG00000058881	Zfp516
mmu-miR-296-5p	ENSMUSG00000058881	Zfp516
mmu-miR-423-5p	ENSMUSG00000046982	Tshz1
mmu-miR-369-3p	ENSMUSG00000049090	Ptgr3
mmu-miR-409-5p	ENSMUSG00000056162	Cndp1
mmu-miR-337-5p	ENSMUSG00000024644	Cndp2
mmu-miR-666-3p	ENSMUSG00000024644	Cndp2
mmu-miR-574-3p	ENSMUSG00000024645	Timm21
mmu-miR-342-3p	ENSMUSG00000024645	Timm21
mmu-miR-369-3p	ENSMUSG00000050321	Neto1
mmu-miR-409-5p	ENSMUSG00000024647	Cbln2
mmu-miR-342-3p	ENSMUSG00000056153	Socs6
mmu-miR-337-5p	ENSMUSG00000023066	Rttn
mmu-miR-409-5p	ENSMUSG00000023066	Rttn
mmu-miR-671-3p	ENSMUSG00000023066	Rttn
mmu-miR-666-3p	ENSMUSG00000023066	Rttn
mmu-miR-671-3p	ENSMUSG00000001376	Vps50
mmu-miR-151-3p	ENSMUSG00000023964	Calcr
mmu-miR-34b-3p	ENSMUSG00000029664	Tfpi2
mmu-miR-532-5p	ENSMUSG00000029663	Gngt1
mmu-miR-673-5p	ENSMUSG00000032766	Gng11
mmu-miR-532-5p	ENSMUSG00000032766	Gng11
mmu-miR-671-5p	ENSMUSG00000032757	Bet1
mmu-miR-337-5p	ENSMUSG00000029661	Col1a2
mmu-miR-139-3p	ENSMUSG00000015189	Casd1
mmu-miR-151-3p	ENSMUSG00000032827	Ppp1r9a
mmu-miR-369-3p	ENSMUSG00000002588	Pon1
mmu-miR-501-3p	ENSMUSG00000029759	Pon3
mmu-miR-151-5p	ENSMUSG00000029759	Pon3
mmu-miR-151-3p	ENSMUSG00000042541	Sem1
mmu-miR-423-3p	ENSMUSG00000029754	Dlx6
mmu-miR-338-3p	ENSMUSG00000029755	Dlx5
mmu-miR-409-5p	ENSMUSG00000061762	Tac1
mmu-miR-673-5p	ENSMUSG00000042460	C1galt1
mmu-miR-501-3p	ENSMUSG00000042447	Mios
mmu-miR-139-3p	ENSMUSG00000062995	Ica1
mmu-miR-337-5p	ENSMUSG00000062995	Ica1
mmu-miR-671-5p	ENSMUSG00000062995	Ica1
mmu-miR-369-3p	ENSMUSG00000046178	Nxph1
mmu-miR-139-3p	ENSMUSG00000029632	Ndufa4
mmu-miR-342-3p	ENSMUSG00000029571	Tmem106b
mmu-miR-369-3p	ENSMUSG00000048216	Gpr85
mmu-miR-666-3p	ENSMUSG00000048216	Gpr85
mmu-miR-501-3p	ENSMUSG00000029563	Foxp2
mmu-miR-139-5p	ENSMUSG00000041390	Mdfic
mmu-miR-501-3p	ENSMUSG00000000058	Cav2
mmu-miR-369-3p	ENSMUSG00000015733	Capza2
mmu-miR-369-5p	ENSMUSG00000015733	Capza2
mmu-miR-151-5p	ENSMUSG00000029534	St7
mmu-miR-532-5p	ENSMUSG00000010797	Wnt2
mmu-miR-331-3p	ENSMUSG00000010797	Wnt2
mmu-miR-671-3p	ENSMUSG00000010797	Wnt2
mmu-miR-671-5p	ENSMUSG00000010796	Asz1
mmu-miR-574-3p	ENSMUSG00000044155	Lsm8
mmu-miR-423-3p	ENSMUSG00000060882	Kcnd2
mmu-miR-369-5p	ENSMUSG00000029669	Tspan12
mmu-miR-423-3p	ENSMUSG00000029672	Fam3c
mmu-miR-409-5p	ENSMUSG00000029672	Fam3c
mmu-miR-671-3p	ENSMUSG00000029672	Fam3c
mmu-miR-342-3p	ENSMUSG00000068748	Ptprz1
mmu-miR-342-3p	ENSMUSG00000107032	Gm5301
mmu-miR-342-3p	ENSMUSG00000106989	Gm5989
mmu-miR-337-5p	ENSMUSG00000029697	Fezf1
mmu-miR-369-3p	ENSMUSG00000029697	Fezf1
mmu-miR-151-5p	ENSMUSG00000017978	Cadps2
mmu-miR-369-3p	ENSMUSG00000051956	Rnf133
mmu-miR-34b-3p	ENSMUSG00000029683	Lmod2
mmu-miR-423-3p	ENSMUSG00000029683	Lmod2
mmu-miR-501-3p	ENSMUSG00000029683	Lmod2
mmu-miR-331-3p	ENSMUSG00000029684	Wasl
mmu-miR-188-5p	ENSMUSG00000029680	Hyal4
mmu-miR-369-3p	ENSMUSG00000029682	Spam1
mmu-miR-532-5p	ENSMUSG00000039904	Gpr37
mmu-miR-369-3p	ENSMUSG00000039904	Gpr37
mmu-miR-337-5p	ENSMUSG00000020440	Arf5
mmu-miR-331-3p	ENSMUSG00000020440	Arf5
mmu-miR-671-5p	ENSMUSG00000020440	Arf5
mmu-miR-151-5p	ENSMUSG00000020440	Arf5
mmu-miR-139-3p	ENSMUSG00000049939	Lrrc4
mmu-miR-532-5p	ENSMUSG00000049939	Lrrc4
mmu-miR-139-5p	ENSMUSG00000029701	Rbm28
mmu-miR-139-5p	ENSMUSG00000003500	Impdh1
mmu-miR-331-3p	ENSMUSG00000003500	Impdh1
mmu-miR-671-5p	ENSMUSG00000003500	Impdh1
mmu-miR-666-3p	ENSMUSG00000003500	Impdh1
mmu-miR-673-5p	ENSMUSG00000043421	Hilpda
mmu-miR-409-5p	ENSMUSG00000039742	Garin1b
mmu-miR-369-5p	ENSMUSG00000039742	Garin1b
mmu-miR-34b-3p	ENSMUSG00000029767	Calu
mmu-miR-574-3p	ENSMUSG00000058831	Opn1sw
mmu-miR-139-3p	ENSMUSG00000058831	Opn1sw
mmu-miR-673-5p	ENSMUSG00000058831	Opn1sw
mmu-miR-423-5p	ENSMUSG00000068699	Flnc
mmu-miR-342-3p	ENSMUSG00000068699	Flnc
mmu-miR-296-5p	ENSMUSG00000068699	Flnc
mmu-miR-423-5p	ENSMUSG00000004285	Atp6v1f
mmu-miR-337-5p	ENSMUSG00000004285	Atp6v1f
mmu-miR-369-5p	ENSMUSG00000004285	Atp6v1f
mmu-miR-342-3p	ENSMUSG00000059022	Kcp
mmu-miR-574-3p	ENSMUSG00000059022	Kcp
mmu-miR-338-3p	ENSMUSG00000029771	Irf5
mmu-miR-296-5p	ENSMUSG00000029771	Irf5
mmu-miR-409-5p	ENSMUSG00000001761	Smo
mmu-miR-409-5p	ENSMUSG00000058440	Nrf1
mmu-miR-337-5p	ENSMUSG00000039130	Zc3hc1
mmu-miR-188-5p	ENSMUSG00000039130	Zc3hc1
mmu-miR-342-3p	ENSMUSG00000039130	Zc3hc1
mmu-miR-574-3p	ENSMUSG00000039130	Zc3hc1
mmu-miR-423-3p	ENSMUSG00000029782	Tmem209
mmu-miR-423-5p	ENSMUSG00000029782	Tmem209
mmu-miR-151-5p	ENSMUSG00000029784	Ssmem1
mmu-miR-369-3p	ENSMUSG00000039070	Cpa4
mmu-miR-369-5p	ENSMUSG00000039070	Cpa4
mmu-miR-671-3p	ENSMUSG00000039070	Cpa4
mmu-miR-337-5p	ENSMUSG00000029788	Cpa5
mmu-miR-369-3p	ENSMUSG00000029790	Cep41
mmu-miR-574-3p	ENSMUSG00000025607	Copg2
mmu-miR-338-3p	ENSMUSG00000025607	Copg2
mmu-miR-296-5p	ENSMUSG00000039032	Tsga13
mmu-miR-423-3p	ENSMUSG00000073209	Klf14
mmu-miR-338-3p	ENSMUSG00000073209	Klf14
mmu-miR-671-5p	ENSMUSG00000029766	1700012A03Rik
mmu-miR-139-5p	ENSMUSG00000029763	Exoc4
mmu-miR-139-3p	ENSMUSG00000029763	Exoc4
mmu-miR-188-5p	ENSMUSG00000029763	Exoc4
mmu-miR-673-5p	ENSMUSG00000056215	Lrguk
mmu-miR-139-3p	ENSMUSG00000001642	Akr1b1
mmu-miR-671-3p	ENSMUSG00000001642	Akr1b1
mmu-miR-671-5p	ENSMUSG00000001642	Akr1b1
mmu-miR-532-5p	ENSMUSG00000029762	Akr1b8
mmu-miR-671-5p	ENSMUSG00000029762	Akr1b8
mmu-miR-139-3p	ENSMUSG00000052131	Akr1b7
mmu-miR-139-3p	ENSMUSG00000038871	Bpgm
mmu-miR-409-5p	ENSMUSG00000038871	Bpgm
mmu-miR-532-5p	ENSMUSG00000058486	Wdr91
mmu-miR-369-5p	ENSMUSG00000058486	Wdr91
mmu-miR-671-3p	ENSMUSG00000058486	Wdr91
mmu-miR-151-3p	ENSMUSG00000058486	Wdr91
mmu-miR-532-5p	ENSMUSG00000029847	Slc23a4
mmu-miR-338-3p	ENSMUSG00000029847	Slc23a4
mmu-miR-331-3p	ENSMUSG00000029847	Slc23a4
mmu-miR-188-5p	ENSMUSG00000038759	Nup205
mmu-miR-139-3p	ENSMUSG00000029843	Slc13a4
mmu-miR-188-5p	ENSMUSG00000047420	Fam180a
mmu-miR-338-3p	ENSMUSG00000029838	Ptn
mmu-miR-369-5p	ENSMUSG00000029838	Ptn
mmu-miR-673-5p	ENSMUSG00000029837	1700111E14Rik
mmu-miR-671-5p	ENSMUSG00000038648	Creb3l2
mmu-miR-139-5p	ENSMUSG00000038641	Akr1d1
mmu-miR-342-3p	ENSMUSG00000029833	Trim24
mmu-miR-501-3p	ENSMUSG00000038600	Atp6v0a4
mmu-miR-666-3p	ENSMUSG00000038600	Atp6v0a4
mmu-miR-342-3p	ENSMUSG00000029829	Tmem213
mmu-miR-532-5p	ENSMUSG00000029826	Zc3hav1
mmu-miR-188-5p	ENSMUSG00000029826	Zc3hav1
mmu-miR-139-3p	ENSMUSG00000038538	Ubn2
mmu-miR-139-5p	ENSMUSG00000038538	Ubn2
mmu-miR-151-3p	ENSMUSG00000038538	Ubn2
mmu-miR-409-5p	ENSMUSG00000029925	Tbxas1
mmu-miR-338-3p	ENSMUSG00000042599	Kdm7a
mmu-miR-369-5p	ENSMUSG00000042599	Kdm7a
mmu-miR-139-3p	ENSMUSG00000029923	Rab19
mmu-miR-34b-3p	ENSMUSG00000029922	Mkrn1
mmu-miR-501-3p	ENSMUSG00000068601	Gm10244
mmu-miR-409-5p	ENSMUSG00000068601	Gm10244
mmu-miR-409-5p	ENSMUSG00000038456	Dennd2a
mmu-miR-331-3p	ENSMUSG00000046947	Adck2
mmu-miR-409-5p	ENSMUSG00000057716	Tmem178b
mmu-miR-671-3p	ENSMUSG00000057716	Tmem178b
mmu-miR-369-3p	ENSMUSG00000029916	Agk
mmu-miR-369-5p	ENSMUSG00000029916	Agk
mmu-miR-342-3p	ENSMUSG00000029916	Agk
mmu-miR-331-3p	ENSMUSG00000037172	Dennd11
mmu-miR-423-3p	ENSMUSG00000037159	Wee2
mmu-miR-188-5p	ENSMUSG00000037159	Wee2
mmu-miR-34b-3p	ENSMUSG00000029911	Ssbp1
mmu-miR-501-3p	ENSMUSG00000029911	Ssbp1
mmu-miR-188-5p	ENSMUSG00000052850	Tas2r137
mmu-miR-501-3p	ENSMUSG00000037140	Tas2r108
[truncated: 13,463 more rows]

## Sheet: Expression summary
monaA-tailed isomiRs expression correlation with target mRNA expression under Tent2 KO in mice hippocampus
Table 2. Table with log2 fold changes nad adjuste P-values calculated for gene, canonical isomiR and monA-tailed isomiR summarised per rows according to their interactions.
MIRNA	Ensembl Gene ID	Gene Name	gene log2FoldChange	gene padj	canonical isomiR log2FoldChange	canonical isomiR pvalue	monA-isomiR log2FoldChange	monA-isomiR pvalue	gene Significant
mmu-miR-673-5p	ENSMUSG00000026686	Lmx1a	2.02047	0.0324785	-0.264954	0.536775	-0.680037	0.0343531	YES
mmu-miR-337-5p	ENSMUSG00000034295	Fhod3	-0.452348	0.0145818	-0.0408363	0.833174	-1.33065	0.709559	YES
mmu-miR-671-3p	ENSMUSG00000059040	Eno1b	3.6462	6.19941e-12	-0.383537	0.273755	-1.14401	0.674049	YES
mmu-miR-501-3p	ENSMUSG00000029759	Pon3	1.20282	0.0130318	0.31491	0.302354	0.783282	0.221205	YES
mmu-miR-151-5p	ENSMUSG00000029759	Pon3	1.20282	0.0130318	-0.0473167	0.801413	0.0282668	0.900961	YES
mmu-miR-574-3p	ENSMUSG00000031026	Trim66	-0.486447	0.0036034	-1.00306	0.0201434	3.42572	0.263154	YES
mmu-miR-673-5p	ENSMUSG00000031026	Trim66	-0.486447	0.0036034	-0.264954	0.536775	-0.680037	0.0343531	YES
mmu-miR-337-5p	ENSMUSG00000040125	Gpr26	-0.30517	0.0168062	-0.0408363	0.833174	-1.33065	0.709559	YES
mmu-miR-369-5p	ENSMUSG00000029335	Bmp3	-0.593354	0.00907294	-0.0348029	0.908875	-0.633128	0.521823	YES
mmu-miR-188-5p	ENSMUSG00000029516	Cit	-0.318114	0.0027425	-2.20972	0.318876	-1.16385	0.646532	YES
mmu-miR-342-3p	ENSMUSG00000042589	Cux2	-0.437136	0.00388998	-0.153595	0.696257	-1.76212	0.42733	YES
mmu-miR-139-5p	ENSMUSG00000026479	Lamc2	-0.79651	0.00712683	-0.0705343	0.816628	-0.955541	0.548138	YES
mmu-miR-338-3p	ENSMUSG00000026479	Lamc2	-0.79651	0.00712683	0.807797	0.0377321	0.545226	0.240263	YES
mmu-miR-369-5p	ENSMUSG00000021806	Nid2	0.826987	0.0280445	-0.0348029	0.908875	-0.633128	0.521823	YES
mmu-miR-671-5p	ENSMUSG00000041112	Elmo1	-0.299363	0.0431607	-0.658749	0.352425	-1.92348	0.54595	YES
mmu-miR-342-3p	ENSMUSG00000021366	Hivep1	-0.347469	0.0207624	-0.153595	0.696257	-1.76212	0.42733	YES
mmu-miR-423-3p	ENSMUSG00000032172	Olfm2	-0.435504	0.00934339	-0.606918	0.275113	-0.977902	0.338619	YES
mmu-miR-338-3p	ENSMUSG00000032172	Olfm2	-0.435504	0.00934339	0.807797	0.0377321	0.545226	0.240263	YES
mmu-miR-34b-3p	ENSMUSG00000032327	Stra6	0.633451	0.0311583	-0.236776	0.643843	-2.05237	0.19094	YES
mmu-miR-423-3p	ENSMUSG00000032327	Stra6	0.633451	0.0311583	-0.606918	0.275113	-0.977902	0.338619	YES
mmu-miR-671-3p	ENSMUSG00000032327	Stra6	0.633451	0.0311583	-0.383537	0.273755	-1.14401	0.674049	YES
mmu-miR-671-5p	ENSMUSG00000032327	Stra6	0.633451	0.0311583	-0.658749	0.352425	-1.92348	0.54595	YES
mmu-miR-151-3p	ENSMUSG00000062151	Unc13c	-0.486431	0.00442747	0.150024	0.579751	-0.191302	0.306068	YES
mmu-miR-296-5p	ENSMUSG00000044468	Tent5c	0.778875	0.0231967	-1.3928	0.000171955	-3.00266	0.0124473	YES
mmu-miR-574-3p	ENSMUSG00000068696	Gpr88	-0.86594	0.0197315	-1.00306	0.0201434	3.42572	0.263154	YES
mmu-miR-188-5p	ENSMUSG00000053819	Camk2d	-0.472392	0.00544629	-2.20972	0.318876	-1.16385	0.646532	YES
mmu-miR-338-3p	ENSMUSG00000053819	Camk2d	-0.472392	0.00544629	0.807797	0.0377321	0.545226	0.240263	YES
mmu-miR-532-5p	ENSMUSG00000050931	Sgms2	0.960594	0.00569129	-0.0375693	0.883907	-2.41669	0.0677441	YES
mmu-miR-369-3p	ENSMUSG00000050931	Sgms2	0.960594	0.00569129	0.217237	0.643052	0.479301	0.884751	YES
mmu-miR-671-5p	ENSMUSG00000050931	Sgms2	0.960594	0.00569129	-0.658749	0.352425	-1.92348	0.54595	YES
mmu-miR-151-5p	ENSMUSG00000050931	Sgms2	0.960594	0.00569129	-0.0473167	0.801413	0.0282668	0.900961	YES
mmu-miR-666-3p	ENSMUSG00000050931	Sgms2	0.960594	0.00569129	-0.157681	0.726433	-3.3675	0.194747	YES
mmu-miR-673-5p	ENSMUSG00000038910	Plcl2	-0.265639	0.0308988	-0.264954	0.536775	-0.680037	0.0343531	YES
mmu-miR-338-3p	ENSMUSG00000048483	Zdhhc22	-0.584847	0.000454389	0.807797	0.0377321	0.545226	0.240263	YES
mmu-miR-188-5p	ENSMUSG00000046719	Nxph3	-0.583993	0.0248893	-2.20972	0.318876	-1.16385	0.646532	YES
mmu-miR-338-3p	ENSMUSG00000046719	Nxph3	-0.583993	0.0248893	0.807797	0.0377321	0.545226	0.240263	YES
mmu-miR-671-3p	ENSMUSG00000046719	Nxph3	-0.583993	0.0248893	-0.383537	0.273755	-1.14401	0.674049	YES
mmu-miR-671-5p	ENSMUSG00000046719	Nxph3	-0.583993	0.0248893	-0.658749	0.352425	-1.92348	0.54595	YES
mmu-miR-671-3p	ENSMUSG00000017417	Plxdc1	-0.686595	1.2014e-05	-0.383537	0.273755	-1.14401	0.674049	YES
mmu-miR-296-5p	ENSMUSG00000017417	Plxdc1	-0.686595	1.2014e-05	-1.3928	0.000171955	-3.00266	0.0124473	YES
mmu-miR-501-3p	ENSMUSG00000032890	Rims3	-0.552604	2.31195e-06	0.31491	0.302354	0.783282	0.221205	YES
mmu-miR-409-5p	ENSMUSG00000032890	Rims3	-0.552604	2.31195e-06	1.24524	0.0614095	-1.5346	0.619529	YES
mmu-miR-331-3p	ENSMUSG00000032890	Rims3	-0.552604	2.31195e-06	-2.04862	0.000874315	-1.512	0.0611883	YES
mmu-miR-342-3p	ENSMUSG00000046447	Camk2n1	-0.274065	0.0489792	-0.153595	0.696257	-1.76212	0.42733	YES
mmu-miR-671-3p	ENSMUSG00000041193	Pla2g5	2.13828	0.0050303	-0.383537	0.273755	-1.14401	0.674049	YES
mmu-miR-671-3p	ENSMUSG00000040659	Efhd2	-0.319386	0.0255173	-0.383537	0.273755	-1.14401	0.674049	YES
mmu-miR-423-5p	ENSMUSG00000041556	Fbxo2	-0.391303	0.00934339	0.208863	0.685655	-1.52058	0.609909	YES
mmu-miR-139-5p	ENSMUSG00000041556	Fbxo2	-0.391303	0.00934339	-0.0705343	0.816628	-0.955541	0.548138	YES
mmu-miR-532-5p	ENSMUSG00000041556	Fbxo2	-0.391303	0.00934339	-0.0375693	0.883907	-2.41669	0.0677441	YES
mmu-miR-151-3p	ENSMUSG00000041556	Fbxo2	-0.391303	0.00934339	0.150024	0.579751	-0.191302	0.306068	YES
mmu-miR-151-5p	ENSMUSG00000041556	Fbxo2	-0.391303	0.00934339	-0.0473167	0.801413	0.0282668	0.900961	YES
mmu-miR-671-3p	ENSMUSG00000063524	Eno1	-0.300806	0.0255173	-0.383537	0.273755	-1.14401	0.674049	YES
mmu-miR-342-3p	ENSMUSG00000036617	Etl4	-0.2984	0.0168062	-0.153595	0.696257	-1.76212	0.42733	YES
mmu-miR-188-5p	ENSMUSG00000076441	Ass1	-0.446122	0.0275641	-2.20972	0.318876	-1.16385	0.646532	YES
mmu-miR-671-5p	ENSMUSG00000076441	Ass1	-0.446122	0.0275641	-0.658749	0.352425	-1.92348	0.54595	YES
mmu-miR-666-3p	ENSMUSG00000076441	Ass1	-0.446122	0.0275641	-0.157681	0.726433	-3.3675	0.194747	YES
mmu-miR-369-3p	ENSMUSG00000000392	Fap	1.40327	0.00504754	0.217237	0.643052	0.479301	0.884751	YES
mmu-miR-139-5p	ENSMUSG00000027210	Meis2	-0.411753	0.0310446	-0.0705343	0.816628	-0.955541	0.548138	YES
mmu-miR-188-5p	ENSMUSG00000037259	Dzank1	-0.304773	0.00544629	-2.20972	0.318876	-1.16385	0.646532	YES
mmu-miR-532-5p	ENSMUSG00000037259	Dzank1	-0.304773	0.00544629	-0.0375693	0.883907	-2.41669	0.0677441	YES
mmu-miR-369-5p	ENSMUSG00000027577	Chrna4	-0.539138	3.69182e-05	-0.0348029	0.908875	-0.633128	0.521823	YES
mmu-miR-139-3p	ENSMUSG00000031828	Klhl36	0.0300811	0.996652	-0.176213	0.806923	-0.797117	0.298897	NO
mmu-miR-673-5p	ENSMUSG00000031827	Cotl1	-0.107369	0.996652	-0.264954	0.536775	-0.680037	0.0343531	NO
mmu-miR-151-5p	ENSMUSG00000031827	Cotl1	-0.107369	0.996652	-0.0473167	0.801413	0.0282668	0.900961	NO
mmu-miR-532-5p	ENSMUSG00000023336	Wfdc1	0.0128566	0.99841	-0.0375693	0.883907	-2.41669	0.0677441	NO
mmu-miR-338-3p	ENSMUSG00000023336	Wfdc1	0.0128566	0.99841	0.807797	0.0377321	0.545226	0.240263	NO
mmu-miR-423-3p	ENSMUSG00000045246	Kcng4	0.0680345	0.996652	-0.606918	0.275113	-0.977902	0.338619	NO
mmu-miR-423-3p	ENSMUSG00000031832	Taf1c	-0.0899051	0.996652	-0.606918	0.275113	-0.977902	0.338619	NO
mmu-miR-139-3p	ENSMUSG00000031832	Taf1c	-0.0899051	0.996652	-0.176213	0.806923	-0.797117	0.298897	NO
mmu-miR-139-5p	ENSMUSG00000031832	Taf1c	-0.0899051	0.996652	-0.0705343	0.816628	-0.955541	0.548138	NO
mmu-miR-338-3p	ENSMUSG00000031832	Taf1c	-0.0899051	0.996652	0.807797	0.0377321	0.545226	0.240263	NO
mmu-miR-671-3p	ENSMUSG00000024266	Adad2	1.18874	0.996652	-0.383537	0.273755	-1.14401	0.674049	NO
mmu-miR-296-5p	ENSMUSG00000024266	Adad2	1.18874	0.996652	-1.3928	0.000171955	-3.00266	0.0124473	NO
mmu-miR-139-5p	ENSMUSG00000031831	Dnaaf1	0.498234	0.996652	-0.0705343	0.816628	-0.955541	0.548138	NO
mmu-miR-671-5p	ENSMUSG00000034189	Hsdl1	-0.15422	0.951188	-0.658749	0.352425	-1.92348	0.54595	NO
mmu-miR-139-3p	ENSMUSG00000031835	Mbtps1	-0.0404989	0.996652	-0.176213	0.806923	-0.797117	0.298897	NO
mmu-miR-139-5p	ENSMUSG00000034224	Slc38a8	0.512186	0.996652	-0.0705343	0.816628	-0.955541	0.548138	NO
mmu-miR-666-3p	ENSMUSG00000034224	Slc38a8	0.512186	0.996652	-0.157681	0.726433	-3.3675	0.194747	NO
mmu-miR-673-5p	ENSMUSG00000031837	Necab2	-0.22404	0.557958	-0.264954	0.536775	-0.680037	0.0343531	NO
mmu-miR-423-5p	ENSMUSG00000031837	Necab2	-0.22404	0.557958	0.208863	0.685655	-1.52058	0.609909	NO
mmu-miR-532-5p	ENSMUSG00000074063	Osgin1	0.850883	0.959951	-0.0375693	0.883907	-2.41669	0.0677441	NO
mmu-miR-338-3p	ENSMUSG00000074063	Osgin1	0.850883	0.959951	0.807797	0.0377321	0.545226	0.240263	NO
mmu-miR-331-3p	ENSMUSG00000074063	Osgin1	0.850883	0.959951	-2.04862	0.000874315	-1.512	0.0611883	NO
mmu-miR-296-5p	ENSMUSG00000074063	Osgin1	0.850883	0.959951	-1.3928	0.000171955	-3.00266	0.0124473	NO
mmu-miR-673-5p	ENSMUSG00000031843	Mphosph6	0.00718398	0.99841	-0.264954	0.536775	-0.680037	0.0343531	NO
mmu-miR-188-5p	ENSMUSG00000031843	Mphosph6	0.00718398	0.99841	-2.20972	0.318876	-1.16385	0.646532	NO
mmu-miR-331-3p	ENSMUSG00000031843	Mphosph6	0.00718398	0.99841	-2.04862	0.000874315	-1.512	0.0611883	NO
mmu-miR-574-3p	ENSMUSG00000034330	Plcg2	0.099141	0.996652	-1.00306	0.0201434	3.42572	0.263154	NO
mmu-miR-423-3p	ENSMUSG00000034330	Plcg2	0.099141	0.996652	-0.606918	0.275113	-0.977902	0.338619	NO
mmu-miR-337-5p	ENSMUSG00000034330	Plcg2	0.099141	0.996652	-0.0408363	0.833174	-1.33065	0.709559	NO
mmu-miR-34b-3p	ENSMUSG00000034390	Cmip	-0.139783	0.89287	-0.236776	0.643843	-2.05237	0.19094	NO
mmu-miR-139-3p	ENSMUSG00000034390	Cmip	-0.139783	0.89287	-0.176213	0.806923	-0.797117	0.298897	NO
mmu-miR-574-3p	ENSMUSG00000052557	Gan	-0.101712	0.996652	-1.00306	0.0201434	3.42572	0.263154	NO
mmu-miR-673-5p	ENSMUSG00000052557	Gan	-0.101712	0.996652	-0.264954	0.536775	-0.680037	0.0343531	NO
mmu-miR-139-5p	ENSMUSG00000052557	Gan	-0.101712	0.996652	-0.0705343	0.816628	-0.955541	0.548138	NO
mmu-miR-501-3p	ENSMUSG00000052557	Gan	-0.101712	0.996652	0.31491	0.302354	0.783282	0.221205	NO
mmu-miR-532-5p	ENSMUSG00000031845	Bco1	-0.53222	0.996652	-0.0375693	0.883907	-2.41669	0.0677441	NO
mmu-miR-673-5p	ENSMUSG00000034424	Gcsh	0.00985028	0.996652	-0.264954	0.536775	-0.680037	0.0343531	NO
mmu-miR-369-5p	ENSMUSG00000034424	Gcsh	0.00985028	0.996652	-0.0348029	0.908875	-0.633128	0.521823	NO
mmu-miR-673-5p	ENSMUSG00000031756	Cenpn	0.16738	0.996652	-0.264954	0.536775	-0.680037	0.0343531	NO
mmu-miR-151-5p	ENSMUSG00000014633	Cmc2	-0.149584	0.996652	-0.0473167	0.801413	0.0282668	0.900961	NO
mmu-miR-337-5p	ENSMUSG00000055435	Maf	0.0952393	0.996652	-0.0408363	0.833174	-1.33065	0.709559	NO
mmu-miR-369-5p	ENSMUSG00000008874	Clec3a	1.89834	0.996652	-0.0348029	0.908875	-0.633128	0.521823	NO
mmu-miR-574-3p	ENSMUSG00000031767	Nudt7	0.204607	0.996652	-1.00306	0.0201434	3.42572	0.263154	NO
mmu-miR-673-5p	ENSMUSG00000031767	Nudt7	0.204607	0.996652	-0.264954	0.536775	-0.680037	0.0343531	NO
mmu-miR-342-3p	ENSMUSG00000031767	Nudt7	0.204607	0.996652	-0.153595	0.696257	-1.76212	0.42733	NO
mmu-miR-151-5p	ENSMUSG00000031767	Nudt7	0.204607	0.996652	-0.0473167	0.801413	0.0282668	0.900961	NO
mmu-miR-139-3p	ENSMUSG00000078908	Mon1b	-0.094438	0.996652	-0.176213	0.806923	-0.797117	0.298897	NO
mmu-miR-409-5p	ENSMUSG00000078908	Mon1b	-0.094438	0.996652	1.24524	0.0614095	-1.5346	0.619529	NO
mmu-miR-666-3p	ENSMUSG00000031772	Cntnap4	-0.127563	0.996652	-0.157681	0.726433	-3.3675	0.194747	NO
mmu-miR-337-5p	ENSMUSG00000031948	Kars1	-0.130222	0.996652	-0.0408363	0.833174	-1.33065	0.709559	NO
mmu-miR-369-5p	ENSMUSG00000031948	Kars1	-0.130222	0.996652	-0.0348029	0.908875	-0.633128	0.521823	NO
mmu-miR-342-3p	ENSMUSG00000031948	Kars1	-0.130222	0.996652	-0.153595	0.696257	-1.76212	0.42733	NO
mmu-miR-423-3p	ENSMUSG00000031950	Gabarapl2	-0.051202	0.996652	-0.606918	0.275113	-0.977902	0.338619	NO
mmu-miR-409-5p	ENSMUSG00000031951	Tmem231	0.0182493	0.996652	1.24524	0.0614095	-1.5346	0.619529	NO
mmu-miR-423-5p	ENSMUSG00000031952	Chst5	-0.676811	0.996652	0.208863	0.685655	-1.52058	0.609909	NO
mmu-miR-532-5p	ENSMUSG00000031953	Tmem170	0.358079	0.458873	-0.0375693	0.883907	-2.41669	0.0677441	NO
mmu-miR-34b-3p	ENSMUSG00000031954	Cfdp1	-0.0178236	0.996652	-0.236776	0.643843	-2.05237	0.19094	NO
mmu-miR-151-5p	ENSMUSG00000031954	Cfdp1	-0.0178236	0.996652	-0.0473167	0.801413	0.0282668	0.900961	NO
mmu-miR-501-3p	ENSMUSG00000033545	Znrf1	-0.0904695	0.996652	0.31491	0.302354	0.783282	0.221205	NO
mmu-miR-342-3p	ENSMUSG00000033579	Fa2h	0.0725399	0.996652	-0.153595	0.696257	-1.76212	0.42733	NO
mmu-miR-671-5p	ENSMUSG00000033579	Fa2h	0.0725399	0.996652	-0.658749	0.352425	-1.92348	0.54595	NO
mmu-miR-532-5p	ENSMUSG00000012519	Mlkl	0.243351	0.996652	-0.0375693	0.883907	-2.41669	0.0677441	NO
mmu-miR-338-3p	ENSMUSG00000012519	Mlkl	0.243351	0.996652	0.807797	0.0377321	0.545226	0.240263	NO
mmu-miR-139-5p	ENSMUSG00000033633	Clec18a	0.37371	0.996652	-0.0705343	0.816628	-0.955541	0.548138	NO
mmu-miR-666-3p	ENSMUSG00000033633	Clec18a	0.37371	0.996652	-0.157681	0.726433	-3.3675	0.194747	NO
mmu-miR-139-3p	ENSMUSG00000031749	St3gal2	-0.0580402	0.996652	-0.176213	0.806923	-0.797117	0.298897	NO
mmu-miR-151-3p	ENSMUSG00000033703	Fcsk	0.154781	0.996652	0.150024	0.579751	-0.191302	0.306068	NO
mmu-miR-666-3p	ENSMUSG00000033703	Fcsk	0.154781	0.996652	-0.157681	0.726433	-3.3675	0.194747	NO
mmu-miR-423-3p	ENSMUSG00000031750	Il34	-0.0411205	0.996652	-0.606918	0.275113	-0.977902	0.338619	NO
mmu-miR-188-5p	ENSMUSG00000031750	Il34	-0.0411205	0.996652	-2.20972	0.318876	-1.16385	0.646532	NO
mmu-miR-409-5p	ENSMUSG00000031750	Il34	-0.0411205	0.996652	1.24524	0.0614095	-1.5346	0.619529	NO
mmu-miR-331-3p	ENSMUSG00000031750	Il34	-0.0411205	0.996652	-2.04862	0.000874315	-1.512	0.0611883	NO
mmu-miR-671-5p	ENSMUSG00000031750	Il34	-0.0411205	0.996652	-0.658749	0.352425	-1.92348	0.54595	NO
mmu-miR-501-3p	ENSMUSG00000010936	Vac14	-0.138518	0.996652	0.31491	0.302354	0.783282	0.221205	NO
mmu-miR-342-3p	ENSMUSG00000053062	Jam2	-0.0102817	0.996652	-0.153595	0.696257	-1.76212	0.42733	NO
mmu-miR-409-5p	ENSMUSG00000059854	Hydin	0.406277	0.931146	1.24524	0.0614095	-1.5346	0.619529	NO
mmu-miR-139-3p	ENSMUSG00000003657	Calb2	0.140187	0.996652	-0.176213	0.806923	-0.797117	0.298897	NO
mmu-miR-671-5p	ENSMUSG00000003657	Calb2	0.140187	0.996652	-0.658749	0.352425	-1.92348	0.54595	NO
mmu-miR-151-5p	ENSMUSG00000003657	Calb2	0.140187	0.996652	-0.0473167	0.801413	0.0282668	0.900961	NO
mmu-miR-673-5p	ENSMUSG00000001672	Marveld3	1.31622	0.948563	-0.264954	0.536775	-0.680037	0.0343531	NO
mmu-miR-671-3p	ENSMUSG00000001672	Marveld3	1.31622	0.948563	-0.383537	0.273755	-1.14401	0.674049	NO
mmu-miR-369-5p	ENSMUSG00000031732	Phlpp2	-0.0826649	0.996652	-0.0348029	0.908875	-0.633128	0.521823	NO
mmu-miR-673-5p	ENSMUSG00000031728	Zfp821	-0.0659681	0.996652	-0.264954	0.536775	-0.680037	0.0343531	NO
mmu-miR-139-5p	ENSMUSG00000031728	Zfp821	-0.0659681	0.996652	-0.0705343	0.816628	-0.955541	0.548138	NO
mmu-miR-151-3p	ENSMUSG00000031728	Zfp821	-0.0659681	0.996652	0.150024	0.579751	-0.191302	0.306068	NO
mmu-miR-296-5p	ENSMUSG00000031728	Zfp821	-0.0659681	0.996652	-1.3928	0.000171955	-3.00266	0.0124473	NO
mmu-miR-666-3p	ENSMUSG00000031728	Zfp821	-0.0659681	0.996652	-0.157681	0.726433	-3.3675	0.194747	NO
mmu-miR-666-3p	ENSMUSG00000048827	Pkd1l3	0.240222	0.996652	-0.157681	0.726433	-3.3675	0.194747	NO
mmu-miR-574-3p	ENSMUSG00000031723	Txnl4b	-0.111436	0.996652	-1.00306	0.0201434	3.42572	0.263154	NO
mmu-miR-337-5p	ENSMUSG00000031723	Txnl4b	-0.111436	0.996652	-0.0408363	0.833174	-1.33065	0.709559	NO
mmu-miR-296-5p	ENSMUSG00000031723	Txnl4b	-0.111436	0.996652	-1.3928	0.000171955	-3.00266	0.0124473	NO
mmu-miR-139-3p	ENSMUSG00000037993	Dhx38	-0.0820387	0.996652	-0.176213	0.806923	-0.797117	0.298897	NO
mmu-miR-331-3p	ENSMUSG00000037993	Dhx38	-0.0820387	0.996652	-2.04862	0.000874315	-1.512	0.0611883	NO
mmu-miR-188-5p	ENSMUSG00000039067	Psmd7	-0.087701	0.996652	-2.20972	0.318876	-1.16385	0.646532	NO
mmu-miR-369-3p	ENSMUSG00000039067	Psmd7	-0.087701	0.996652	0.217237	0.643052	0.479301	0.884751	NO
mmu-miR-337-5p	ENSMUSG00000003848	Nob1	-0.0256205	0.996652	-0.0408363	0.833174	-1.33065	0.709559	NO
mmu-miR-188-5p	ENSMUSG00000003848	Nob1	-0.0256205	0.996652	-2.20972	0.318876	-1.16385	0.646532	NO
mmu-miR-151-5p	ENSMUSG00000003848	Nob1	-0.0256205	0.996652	-0.0473167	0.801413	0.0282668	0.900961	NO
mmu-miR-666-3p	ENSMUSG00000003848	Nob1	-0.0256205	0.996652	-0.157681	0.726433	-3.3675	0.194747	NO
mmu-miR-331-3p	ENSMUSG00000003849	Nqo1	0.234215	0.996652	-2.04862	0.000874315	-1.512	0.0611883	NO
mmu-miR-337-5p	ENSMUSG00000003847	Nfat5	0.0441398	0.996652	-0.0408363	0.833174	-1.33065	0.709559	NO
mmu-miR-409-5p	ENSMUSG00000033557	Fam20b	-0.162373	0.915501	1.24524	0.0614095	-1.5346	0.619529	NO
mmu-miR-151-5p	ENSMUSG00000033557	Fam20b	-0.162373	0.915501	-0.0473167	0.801413	0.0282668	0.900961	NO
mmu-miR-666-3p	ENSMUSG00000033557	Fam20b	-0.162373	0.915501	-0.157681	0.726433	-3.3675	0.194747	NO
mmu-miR-673-5p	ENSMUSG00000031921	Terf2	-0.139631	0.996652	-0.264954	0.536775	-0.680037	0.0343531	NO
mmu-miR-338-3p	ENSMUSG00000031921	Terf2	-0.139631	0.996652	0.807797	0.0377321	0.545226	0.240263	NO
mmu-miR-532-5p	ENSMUSG00000031919	Tmed6	0.273907	0.996652	-0.0375693	0.883907	-2.41669	0.0677441	NO
mmu-miR-574-3p	ENSMUSG00000031917	Nip7	-0.0611171	0.996652	-1.00306	0.0201434	3.42572	0.263154	NO
mmu-miR-342-3p	ENSMUSG00000031917	Nip7	-0.0611171	0.996652	-0.153595	0.696257	-1.76212	0.42733	NO
mmu-miR-671-3p	ENSMUSG00000031916	Cog8	-0.182144	0.990122	-0.383537	0.273755	-1.14401	0.674049	NO
mmu-miR-139-3p	ENSMUSG00000031913	Vps4a	-0.15311	0.860635	-0.176213	0.806923	-0.797117	0.298897	NO
mmu-miR-423-5p	ENSMUSG00000031913	Vps4a	-0.15311	0.860635	0.208863	0.685655	-1.52058	0.609909	NO
mmu-miR-337-5p	ENSMUSG00000031913	Vps4a	-0.15311	0.860635	-0.0408363	0.833174	-1.33065	0.709559	NO
mmu-miR-151-5p	ENSMUSG00000031913	Vps4a	-0.15311	0.860635	-0.0473167	0.801413	0.0282668	0.900961	NO
mmu-miR-296-5p	ENSMUSG00000031913	Vps4a	-0.15311	0.860635	-1.3928	0.000171955	-3.00266	0.0124473	NO
mmu-miR-151-5p	ENSMUSG00000031910	Has3	-0.0467793	0.996652	-0.0473167	0.801413	0.0282668	0.900961	NO
mmu-miR-501-3p	ENSMUSG00000041949	Tango6	0.0830653	0.996652	0.31491	0.302354	0.783282	0.221205	NO
mmu-miR-409-5p	ENSMUSG00000000303	Cdh1	-0.329479	0.996652	1.24524	0.0614095	-1.5346	0.619529	NO
mmu-miR-423-3p	ENSMUSG00000031903	Pla2g15	-0.196211	0.931146	-0.606918	0.275113	-0.977902	0.338619	NO
mmu-miR-423-5p	ENSMUSG00000031903	Pla2g15	-0.196211	0.931146	0.208863	0.685655	-1.52058	0.609909	NO
mmu-miR-409-5p	ENSMUSG00000031903	Pla2g15	-0.196211	0.931146	1.24524	0.0614095	-1.5346	0.619529	NO
mmu-miR-338-3p	ENSMUSG00000031903	Pla2g15	-0.196211	0.931146	0.807797	0.0377321	0.545226	0.240263	NO
mmu-miR-574-3p	ENSMUSG00000031901	Dus2	-0.117438	0.996652	-1.00306	0.0201434	3.42572	0.263154	NO
mmu-miR-188-5p	ENSMUSG00000031901	Dus2	-0.117438	0.996652	-2.20972	0.318876	-1.16385	0.646532	NO
mmu-miR-331-3p	ENSMUSG00000031901	Dus2	-0.117438	0.996652	-2.04862	0.000874315	-1.512	0.0611883	NO
mmu-miR-342-3p	ENSMUSG00000031901	Dus2	-0.117438	0.996652	-0.153595	0.696257	-1.76212	0.42733	NO
mmu-miR-151-3p	ENSMUSG00000031901	Dus2	-0.117438	0.996652	0.150024	0.579751	-0.191302	0.306068	NO
mmu-miR-139-3p	ENSMUSG00000017765	Slc12a4	0.166824	0.996652	-0.176213	0.806923	-0.797117	0.298897	NO
mmu-miR-331-3p	ENSMUSG00000017765	Slc12a4	0.166824	0.996652	-2.04862	0.000874315	-1.512	0.0611883	NO
mmu-miR-671-5p	ENSMUSG00000035237	Lcat	0.105609	0.996652	-0.658749	0.352425	-1.92348	0.54595	NO
mmu-miR-532-5p	ENSMUSG00000044287	Nrn1l	1.63385	0.996652	-0.0375693	0.883907	-2.41669	0.0677441	NO
mmu-miR-666-3p	ENSMUSG00000044287	Nrn1l	1.63385	0.996652	-0.157681	0.726433	-3.3675	0.194747	NO
mmu-miR-532-5p	ENSMUSG00000036270	Edc4	-0.0584588	0.996652	-0.0375693	0.883907	-2.41669	0.0677441	NO
mmu-miR-409-5p	ENSMUSG00000036270	Edc4	-0.0584588	0.996652	1.24524	0.0614095	-1.5346	0.619529	NO
mmu-miR-331-3p	ENSMUSG00000036270	Edc4	-0.0584588	0.996652	-2.04862	0.000874315	-1.512	0.0611883	NO
mmu-miR-34b-3p	ENSMUSG00000036442	Thap11	-0.0898888	0.996652	-0.236776	0.643843	-2.05237	0.19094	NO
mmu-miR-409-5p	ENSMUSG00000036442	Thap11	-0.0898888	0.996652	1.24524	0.0614095	-1.5346	0.619529	NO
mmu-miR-501-3p	ENSMUSG00000036672	Cenpt	0.018047	0.996652	0.31491	0.302354	0.783282	0.221205	NO
mmu-miR-423-3p	ENSMUSG00000013150	Gfod2	-0.0958989	0.996652	-0.606918	0.275113	-0.977902	0.338619	NO
mmu-miR-139-5p	ENSMUSG00000013150	Gfod2	-0.0958989	0.996652	-0.0705343	0.816628	-0.955541	0.548138	NO
mmu-miR-369-3p	ENSMUSG00000013150	Gfod2	-0.0958989	0.996652	0.217237	0.643052	0.479301	0.884751	NO
mmu-miR-151-3p	ENSMUSG00000013158	4933405L10Rik	-0.307139	0.996652	0.150024	0.579751	-0.191302	0.306068	NO
mmu-miR-331-3p	ENSMUSG00000013155	Enkd1	-0.0710193	0.996652	-2.04862	0.000874315	-1.512	0.0611883	NO
mmu-miR-151-3p	ENSMUSG00000005699	Pard6a	-0.210732	0.996652	0.150024	0.579751	-0.191302	0.306068	NO
mmu-miR-666-3p	ENSMUSG00000038000	Acd	-0.20139	0.989841	-0.157681	0.726433	-3.3675	0.194747	NO
mmu-miR-151-3p	ENSMUSG00000005698	Ctcf	-0.10042	0.996652	0.150024	0.579751	-0.191302	0.306068	NO
mmu-miR-188-5p	ENSMUSG00000005705	Agrp	-0.221099	0.996652	-2.20972	0.318876	-1.16385	0.646532	NO
mmu-miR-423-5p	ENSMUSG00000013160	Atp6v0d1	-0.158633	0.828051	0.208863	0.685655	-1.52058	0.609909	NO
mmu-miR-151-3p	ENSMUSG00000031891	Hsd11b2	0.101891	0.996652	0.150024	0.579751	-0.191302	0.306068	NO
mmu-miR-151-5p	ENSMUSG00000031891	Hsd11b2	0.101891	0.996652	-0.0473167	0.801413	0.0282668	0.900961	NO
mmu-miR-666-3p	ENSMUSG00000031891	Hsd11b2	0.101891	0.996652	-0.157681	0.726433	-3.3675	0.194747	NO
mmu-miR-331-3p	ENSMUSG00000014846	Tppp3	0.156498	0.996652	-2.04862	0.000874315	-1.512	0.0611883	NO
mmu-miR-673-5p	ENSMUSG00000039199	Zdhhc1	0.0792605	0.996652	-0.264954	0.536775	-0.680037	0.0343531	NO
mmu-miR-369-3p	ENSMUSG00000054320	Lrrc36	-0.159397	0.996652	0.217237	0.643052	0.479301	0.884751	NO
mmu-miR-151-3p	ENSMUSG00000051648	Kctd19	3.89466	0.996652	0.150024	0.579751	-0.191302	0.306068	NO
mmu-miR-574-3p	ENSMUSG00000014786	Slc9a5	-0.0389164	0.996652	-1.00306	0.0201434	3.42572	0.263154	NO
mmu-miR-34b-3p	ENSMUSG00000014782	Plekhg4	0.402638	0.996652	-0.236776	0.643843	-2.05237	0.19094	NO
mmu-miR-342-3p	ENSMUSG00000014778	Fhod1	0.0653157	0.996652	-0.153595	0.696257	-1.76212	0.42733	NO
mmu-miR-338-3p	ENSMUSG00000041679	Fbxl9	0.152233	0.996652	0.807797	0.0377321	0.545226	0.240263	NO
mmu-miR-296-5p	ENSMUSG00000041679	Fbxl9	0.152233	0.996652	-1.3928	0.000171955	-3.00266	0.0124473	NO
mmu-miR-423-5p	ENSMUSG00000014859	E2f4	-0.0653363	0.996652	0.208863	0.685655	-1.52058	0.609909	NO
mmu-miR-666-3p	ENSMUSG00000014859	E2f4	-0.0653363	0.996652	-0.157681	0.726433	-3.3675	0.194747	NO
mmu-miR-574-3p	ENSMUSG00000043251	Exoc3l	-0.0411673	0.996652	-1.00306	0.0201434	3.42572	0.263154	NO
mmu-miR-331-3p	ENSMUSG00000043251	Exoc3l	-0.0411673	0.996652	-2.04862	0.000874315	-1.512	0.0611883	NO
mmu-miR-342-3p	ENSMUSG00000043251	Exoc3l	-0.0411673	0.996652	-0.153595	0.696257	-1.76212	0.42733	NO
mmu-miR-139-5p	ENSMUSG00000014837	Matcap1	-0.169134	0.996652	-0.0705343	0.816628	-0.955541	0.548138	NO
mmu-miR-296-5p	ENSMUSG00000014837	Matcap1	-0.169134	0.996652	-1.3928	0.000171955	-3.00266	0.0124473	NO
mmu-miR-423-5p	ENSMUSG00000033249	Hsf4	-0.368618	0.996652	0.208863	0.685655	-1.52058	0.609909	NO
mmu-miR-671-5p	ENSMUSG00000033249	Hsf4	-0.368618	0.996652	-0.658749	0.352425	-1.92348	0.54595	NO
mmu-miR-574-3p	ENSMUSG00000014776	Nol3	-0.138719	0.996652	-1.00306	0.0201434	3.42572	0.263154	NO
mmu-miR-673-5p	ENSMUSG00000014776	Nol3	-0.138719	0.996652	-0.264954	0.536775	-0.680037	0.0343531	NO
mmu-miR-574-3p	ENSMUSG00000033313	Fbxl8	0.0226177	0.99841	-1.00306	0.0201434	3.42572	0.263154	NO
mmu-miR-673-5p	ENSMUSG00000033313	Fbxl8	0.0226177	0.99841	-0.264954	0.536775	-0.680037	0.0343531	NO
mmu-miR-671-3p	ENSMUSG00000033313	Fbxl8	0.0226177	0.99841	-0.383537	0.273755	-1.14401	0.674049	NO
mmu-miR-139-3p	ENSMUSG00000031889	Phaf1	0.0278971	0.996652	-0.176213	0.806923	-0.797117	0.298897	NO
mmu-miR-673-5p	ENSMUSG00000062181	Ces3b	1.89834	0.996652	-0.264954	0.536775	-0.680037	0.0343531	NO
mmu-miR-337-5p	ENSMUSG00000062181	Ces3b	1.89834	0.996652	-0.0408363	0.833174	-1.33065	0.709559	NO
mmu-miR-673-5p	ENSMUSG00000069922	Ces3a	-0.604369	0.996652	-0.264954	0.536775	-0.680037	0.0343531	NO
mmu-miR-337-5p	ENSMUSG00000069922	Ces3a	-0.604369	0.996652	-0.0408363	0.833174	-1.33065	0.709559	NO
mmu-miR-342-3p	ENSMUSG00000050097	Ces2b	0.48553	0.996652	-0.153595	0.696257	-1.76212	0.42733	NO
mmu-miR-369-3p	ENSMUSG00000055730	Ces2a	NA	NA	0.217237	0.643052	0.479301	0.884751	NO
mmu-miR-342-3p	ENSMUSG00000055730	Ces2a	NA	NA	-0.153595	0.696257	-1.76212	0.42733	NO
mmu-miR-369-5p	ENSMUSG00000023737	1700082M22Rik	0.150619	0.996652	-0.0348029	0.908875	-0.633128	0.521823	NO
mmu-miR-337-5p	ENSMUSG00000031880	Rrad	-0.770485	0.996652	-0.0408363	0.833174	-1.33065	0.709559	NO
mmu-miR-342-3p	ENSMUSG00000048371	Pdp2	-0.0241418	0.996652	-0.153595	0.696257	-1.76212	0.42733	NO
mmu-miR-671-5p	ENSMUSG00000031883	Car7	-0.223002	0.996652	-0.658749	0.352425	-1.92348	0.54595	NO
mmu-miR-342-3p	ENSMUSG00000052616	Terb1	-0.510924	0.959706	-0.153595	0.696257	-1.76212	0.42733	NO
mmu-miR-666-3p	ENSMUSG00000035785	Cmtm2b	3.68961	0.996652	-0.157681	0.726433	-3.3675	0.194747	NO
mmu-miR-331-3p	ENSMUSG00000074127	Cmtm2a	1.31918	0.996652	-2.04862	0.000874315	-1.512	0.0611883	NO
mmu-miR-666-3p	ENSMUSG00000054400	Cklf	-0.0312542	0.996652	-0.157681	0.726433	-3.3675	0.194747	NO
mmu-miR-673-5p	ENSMUSG00000054400	Cklf	-0.0312542	0.996652	-0.264954	0.536775	-0.680037	0.0343531	NO
mmu-miR-671-5p	ENSMUSG00000035824	Tk2	-0.101327	0.996652	-0.658749	0.352425	-1.92348	0.54595	NO
mmu-miR-188-5p	ENSMUSG00000036510	Cdh8	-0.0785209	0.996652	-2.20972	0.318876	-1.16385	0.646532	NO
mmu-miR-574-3p	ENSMUSG00000031672	Got2	-0.174527	0.642215	-1.00306	0.0201434	3.42572	0.263154	NO
mmu-miR-673-5p	ENSMUSG00000036550	Cnot1	-0.0309459	0.996652	-0.264954	0.536775	-0.680037	0.0343531	NO
mmu-miR-369-5p	ENSMUSG00000036550	Cnot1	-0.0309459	0.996652	-0.0348029	0.908875	-0.633128	0.521823	NO
mmu-miR-671-3p	ENSMUSG00000031671	Setd6	0.0509138	0.996652	-0.383537	0.273755	-1.14401	0.674049	NO
mmu-miR-671-5p	ENSMUSG00000031671	Setd6	0.0509138	0.996652	-0.658749	0.352425	-1.92348	0.54595	NO
mmu-miR-331-3p	ENSMUSG00000048400	Prss54	-0.0967479	0.997001	-2.04862	0.000874315	-1.512	0.0611883	NO
mmu-miR-342-3p	ENSMUSG00000031796	Cfap20	0.0448203	0.996652	-0.153595	0.696257	-1.76212	0.42733	NO
mmu-miR-671-3p	ENSMUSG00000046707	Csnk2a2	-0.00392393	0.99841	-0.383537	0.273755	-1.14401	0.674049	NO
mmu-miR-671-5p	ENSMUSG00000046707	Csnk2a2	-0.00392393	0.99841	-0.658749	0.352425	-1.92348	0.54595	NO
mmu-miR-342-3p	ENSMUSG00000031789	Cngb1	-0.272968	0.996652	-0.153595	0.696257	-1.76212	0.42733	NO
mmu-miR-673-5p	ENSMUSG00000060470	Adgrg3	-0.0739006	0.996652	-0.264954	0.536775	-0.680037	0.0343531	NO
mmu-miR-671-3p	ENSMUSG00000060470	Adgrg3	-0.0739006	0.996652	-0.383537	0.273755	-1.14401	0.674049	NO
mmu-miR-34b-3p	ENSMUSG00000063605	Ccdc102a	0.189588	0.996652	-0.236776	0.643843	-2.05237	0.19094	NO
mmu-miR-331-3p	ENSMUSG00000063605	Ccdc102a	0.189588	0.996652	-2.04862	0.000874315	-1.512	0.0611883	NO
mmu-miR-532-5p	ENSMUSG00000061577	Adgrg5	0.323123	0.996652	-0.0375693	0.883907	-2.41669	0.0677441	NO
mmu-miR-331-3p	ENSMUSG00000061577	Adgrg5	0.323123	0.996652	-2.04862	0.000874315	-1.512	0.0611883	NO
mmu-miR-338-3p	ENSMUSG00000040631	Dok4	-0.035136	0.996652	0.807797	0.0377321	0.545226	0.240263	NO
mmu-miR-337-5p	ENSMUSG00000031782	Coq9	0.00805318	0.997193	-0.0408363	0.833174	-1.33065	0.709559	NO
mmu-miR-338-3p	ENSMUSG00000050079	Rspry1	0.04523	0.996652	0.807797	0.0377321	0.545226	0.240263	NO
mmu-miR-139-3p	ENSMUSG00000034361	Cpne2	0.168609	0.996652	-0.176213	0.806923	-0.797117	0.298897	NO
mmu-miR-671-5p	ENSMUSG00000034361	Cpne2	0.168609	0.996652	-0.658749	0.352425	-1.92348	0.54595	NO
mmu-miR-139-3p	ENSMUSG00000032939	Nup93	0.163364	0.798472	-0.176213	0.806923	-0.797117	0.298897	NO
mmu-miR-671-3p	ENSMUSG00000031766	Slc12a3	0.556313	0.996652	-0.383537	0.273755	-1.14401	0.674049	NO
mmu-miR-423-3p	ENSMUSG00000031765	Mt1	0.0273534	0.996652	-0.606918	0.275113	-0.977902	0.338619	NO
mmu-miR-139-3p	ENSMUSG00000031765	Mt1	0.0273534	0.996652	-0.176213	0.806923	-0.797117	0.298897	NO
mmu-miR-296-5p	ENSMUSG00000031762	Mt2	0.0255997	0.996652	-1.3928	0.000171955	-3.00266	0.0124473	NO
mmu-miR-673-5p	ENSMUSG00000031757	Mt4	0.543087	0.996652	-0.264954	0.536775	-0.680037	0.0343531	NO
mmu-miR-501-3p	ENSMUSG00000031757	Mt4	0.543087	0.996652	0.31491	0.302354	0.783282	0.221205	NO
mmu-miR-34b-3p	ENSMUSG00000031755	Bbs2	-0.0754159	0.996652	-0.236776	0.643843	-2.05237	0.19094	NO
mmu-miR-501-3p	ENSMUSG00000031751	Amfr	-0.0999898	0.996652	0.31491	0.302354	0.783282	0.221205	NO
mmu-miR-369-3p	ENSMUSG00000057074	Ces1g	NA	NA	0.217237	0.643052	0.479301	0.884751	NO
mmu-miR-331-3p	ENSMUSG00000031725	Ces1f	-1.45141	0.996652	-2.04862	0.000874315	-1.512	0.0611883	NO
mmu-miR-369-3p	ENSMUSG00000056973	Ces1d	5.12688	0.456251	0.217237	0.643052	0.479301	0.884751	NO
mmu-miR-337-5p	ENSMUSG00000071047	Ces1a	NA	NA	-0.0408363	0.833174	-1.33065	0.709559	NO
mmu-miR-34b-3p	ENSMUSG00000031740	Mmp2	0.498304	0.898538	-0.236776	0.643843	-2.05237	0.19094	NO
mmu-miR-671-5p	ENSMUSG00000031740	Mmp2	0.498304	0.898538	-0.658749	0.352425	-1.92348	0.54595	NO
mmu-miR-139-5p	ENSMUSG00000031736	Crnde	-0.22654	0.996652	-0.0705343	0.816628	-0.955541	0.548138	NO
mmu-miR-369-3p	ENSMUSG00000031734	Irx3	0.903745	0.996652	0.217237	0.643052	0.479301	0.884751	NO
mmu-miR-151-5p	ENSMUSG00000031734	Irx3	0.903745	0.996652	-0.0473167	0.801413	0.0282668	0.900961	NO
mmu-miR-671-5p	ENSMUSG00000055932	Fto	-0.134347	0.829089	-0.658749	0.352425	-1.92348	0.54595	NO
mmu-miR-423-3p	ENSMUSG00000074171	Gm6658	-0.255698	0.996652	-0.606918	0.275113	-0.977902	0.338619	NO
mmu-miR-369-3p	ENSMUSG00000069962	Gm5356	-0.488994	0.996652	0.217237	0.643052	0.479301	0.884751	NO
mmu-miR-369-3p	ENSMUSG00000063875	Rps6-ps1	0.697328	0.974891	0.217237	0.643052	0.479301	0.884751	NO
mmu-miR-139-3p	ENSMUSG00000055994	Nod2	0.122783	0.996652	-0.176213	0.806923	-0.797117	0.298897	NO
mmu-miR-296-5p	ENSMUSG00000031662	Snx20	-0.42071	0.996652	-1.3928	0.000171955	-3.00266	0.0124473	NO
mmu-miR-369-3p	ENSMUSG00000031660	Brd7	0.0725898	0.996652	0.217237	0.643052	0.479301	0.884751	NO
mmu-miR-532-5p	ENSMUSG00000062704	9430002A10Rik	0.410285	0.996652	-0.0375693	0.883907	-2.41669	0.0677441	NO
mmu-miR-369-3p	ENSMUSG00000062704	9430002A10Rik	0.410285	0.996652	0.217237	0.643052	0.479301	0.884751	NO
mmu-miR-369-5p	ENSMUSG00000062704	9430002A10Rik	0.410285	0.996652	-0.0348029	0.908875	-0.633128	0.521823	NO
mmu-miR-369-5p	ENSMUSG00000036779	Tent4b	-0.0400101	0.996652	-0.0348029	0.908875	-0.633128	0.521823	NO
mmu-miR-338-3p	ENSMUSG00000036810	Cnep1r1	0.0129871	0.996652	0.807797	0.0377321	0.545226	0.240263	NO
mmu-miR-188-5p	ENSMUSG00000045333	Zfp423	-0.056151	0.996652	-2.20972	0.318876	-1.16385	0.646532	NO
mmu-miR-423-5p	ENSMUSG00000036872	Abcc12	-0.334562	0.996652	0.208863	0.685655	-1.52058	0.609909	NO
mmu-miR-671-3p	ENSMUSG00000036872	Abcc12	-0.334562	0.996652	-0.383537	0.273755	-1.14401	0.674049	NO
mmu-miR-34b-3p	ENSMUSG00000036879	Phkb	0.0403416	0.996652	-0.236776	0.643843	-2.05237	0.19094	NO
mmu-miR-34b-3p	ENSMUSG00000031703	Itfg1	-0.0781606	0.996652	-0.236776	0.643843	-2.05237	0.19094	NO
mmu-miR-501-3p	ENSMUSG00000031703	Itfg1	-0.0781606	0.996652	0.31491	0.302354	0.783282	0.221205	NO
mmu-miR-151-5p	ENSMUSG00000031703	Itfg1	-0.0781606	0.996652	-0.0473167	0.801413	0.0282668	0.900961	NO
mmu-miR-574-3p	ENSMUSG00000031701	Dnaja2	-0.0764579	0.996652	-1.00306	0.0201434	3.42572	0.263154	NO
mmu-miR-423-3p	ENSMUSG00000031697	Orc6	-0.000688369	0.999652	-0.606918	0.275113	-0.977902	0.338619	NO
mmu-miR-151-3p	ENSMUSG00000031697	Orc6	-0.000688369	0.999652	0.150024	0.579751	-0.191302	0.306068	NO
mmu-miR-337-5p	ENSMUSG00000031698	Mylk3	0.16333	0.996652	-0.0408363	0.833174	-1.33065	0.709559	NO
mmu-miR-34b-3p	ENSMUSG00000031696	Vps35	-0.0951849	0.996652	-0.236776	0.643843	-2.05237	0.19094	NO
mmu-miR-423-5p	ENSMUSG00000005142	Man2b1	0.000582779	0.999652	0.208863	0.685655	-1.52058	0.609909	NO
mmu-miR-574-3p	ENSMUSG00000059355	Wdr83os	-0.0614906	0.996652	-1.00306	0.0201434	3.42572	0.263154	NO
mmu-miR-296-5p	ENSMUSG00000059355	Wdr83os	-0.0614906	0.996652	-1.3928	0.000171955	-3.00266	0.0124473	NO
mmu-miR-331-3p	ENSMUSG00000005150	Wdr83	0.083913	0.996652	-2.04862	0.000874315	-1.512	0.0611883	NO
mmu-miR-151-3p	ENSMUSG00000005150	Wdr83	0.083913	0.996652	0.150024	0.579751	-0.191302	0.306068	NO
mmu-miR-423-5p	ENSMUSG00000060038	Dhps	-0.105572	0.996652	0.208863	0.685655	-1.52058	0.609909	NO
mmu-miR-671-5p	ENSMUSG00000060038	Dhps	-0.105572	0.996652	-0.658749	0.352425	-1.92348	0.54595	NO
mmu-miR-188-5p	ENSMUSG00000052456	Get3	-0.0957155	0.996652	-2.20972	0.318876	-1.16385	0.646532	NO
mmu-miR-296-5p	ENSMUSG00000052456	Get3	-0.0957155	0.996652	-1.3928	0.000171955	-3.00266	0.0124473	NO
mmu-miR-574-3p	ENSMUSG00000052566	Hook2	0.0939248	0.996652	-1.00306	0.0201434	3.42572	0.263154	NO
mmu-miR-423-5p	ENSMUSG00000052566	Hook2	0.0939248	0.996652	0.208863	0.685655	-1.52058	0.609909	NO
mmu-miR-151-3p	ENSMUSG00000052566	Hook2	0.0939248	0.996652	0.150024	0.579751	-0.191302	0.306068	NO
mmu-miR-151-5p	ENSMUSG00000052566	Hook2	0.0939248	0.996652	-0.0473167	0.801413	0.0282668	0.900961	NO
mmu-miR-151-3p	ENSMUSG00000005161	Prdx2	-0.116013	0.996652	0.150024	0.579751	-0.191302	0.306068	NO
mmu-miR-532-5p	ENSMUSG00000003812	Dnase2a	-0.105684	0.996652	-0.0375693	0.883907	-2.41669	0.0677441	NO
mmu-miR-409-5p	ENSMUSG00000003812	Dnase2a	-0.105684	0.996652	1.24524	0.0614095	-1.5346	0.619529	NO
mmu-miR-671-3p	ENSMUSG00000003812	Dnase2a	-0.105684	0.996652	-0.383537	0.273755	-1.14401	0.674049	NO
mmu-miR-151-3p	ENSMUSG00000003812	Dnase2a	-0.105684	0.996652	0.150024	0.579751	-0.191302	0.306068	NO
mmu-miR-337-5p	ENSMUSG00000054191	Klf1	-0.231886	0.996652	-0.0408363	0.833174	-1.33065	0.709559	NO
mmu-miR-369-5p	ENSMUSG00000054191	Klf1	-0.231886	0.996652	-0.0348029	0.908875	-0.633128	0.521823	NO
mmu-miR-331-3p	ENSMUSG00000003809	Gcdh	0.0555556	0.996652	-2.04862	0.000874315	-1.512	0.0611883	NO
mmu-miR-671-3p	ENSMUSG00000003809	Gcdh	0.0555556	0.996652	-0.383537	0.273755	-1.14401	0.674049	NO
mmu-miR-532-5p	ENSMUSG00000003824	Syce2	-0.124124	0.996652	-0.0375693	0.883907	-2.41669	0.0677441	NO
mmu-miR-342-3p	ENSMUSG00000003824	Syce2	-0.124124	0.996652	-0.153595	0.696257	-1.76212	0.42733	NO
mmu-miR-423-5p	ENSMUSG00000003808	Farsa	0.0545275	0.996652	0.208863	0.685655	-1.52058	0.609909	NO
mmu-miR-501-3p	ENSMUSG00000003808	Farsa	0.0545275	0.996652	0.31491	0.302354	0.783282	0.221205	NO
mmu-miR-338-3p	ENSMUSG00000003808	Farsa	0.0545275	0.996652	0.807797	0.0377321	0.545226	0.240263	NO
mmu-miR-296-5p	ENSMUSG00000033751	Gadd45gip1	-0.0796737	0.996652	-1.3928	0.000171955	-3.00266	0.0124473	NO
mmu-miR-409-5p	ENSMUSG00000034041	Lyl1	-0.131351	0.996652	1.24524	0.0614095	-1.5346	0.619529	NO
mmu-miR-671-3p	ENSMUSG00000034041	Lyl1	-0.131351	0.996652	-0.383537	0.273755	-1.14401	0.674049	NO
mmu-miR-342-3p	ENSMUSG00000034041	Lyl1	-0.131351	0.996652	-0.153595	0.696257	-1.76212	0.42733	NO
mmu-miR-671-3p	ENSMUSG00000001909	Trmt1	0.0488442	0.996652	-0.383537	0.273755	-1.14401	0.674049	NO
mmu-miR-423-5p	ENSMUSG00000019362	D8Ertd738e	-0.140244	0.996652	0.208863	0.685655	-1.52058	0.609909	NO
mmu-miR-337-5p	ENSMUSG00000019362	D8Ertd738e	-0.140244	0.996652	-0.0408363	0.833174	-1.33065	0.709559	NO
mmu-miR-296-5p	ENSMUSG00000019362	D8Ertd738e	-0.140244	0.996652	-1.3928	0.000171955	-3.00266	0.0124473	NO
mmu-miR-139-5p	ENSMUSG00000056155	Nanos3	0.0949858	0.996652	-0.0705343	0.816628	-0.955541	0.548138	NO
mmu-miR-338-3p	ENSMUSG00000056155	Nanos3	0.0949858	0.996652	0.807797	0.0377321	0.545226	0.240263	NO
mmu-miR-423-3p	ENSMUSG00000008129	Brme1	0.135932	0.996652	-0.606918	0.275113	-0.977902	0.338619	NO
mmu-miR-337-5p	ENSMUSG00000008129	Brme1	0.135932	0.996652	-0.0408363	0.833174	-1.33065	0.709559	NO
mmu-miR-666-3p	ENSMUSG00000008129	Brme1	0.135932	0.996652	-0.157681	0.726433	-3.3675	0.194747	NO
mmu-miR-423-3p	ENSMUSG00000030069	Prok2	-0.138231	0.996652	-0.606918	0.275113	-0.977902	0.338619	NO
mmu-miR-337-5p	ENSMUSG00000030069	Prok2	-0.138231	0.996652	-0.0408363	0.833174	-1.33065	0.709559	NO
mmu-miR-666-3p	ENSMUSG00000030069	Prok2	-0.138231	0.996652	-0.157681	0.726433	-3.3675	0.194747	NO
mmu-miR-423-5p	ENSMUSG00000036686	Cc2d1a	0.012303	0.996652	0.208863	0.685655	-1.52058	0.609909	NO
mmu-miR-331-3p	ENSMUSG00000036686	Cc2d1a	0.012303	0.996652	-2.04862	0.000874315	-1.512	0.0611883	NO
mmu-miR-671-5p	ENSMUSG00000036686	Cc2d1a	0.012303	0.996652	-0.658749	0.352425	-1.92348	0.54595	NO
mmu-miR-409-5p	ENSMUSG00000037103	Dcaf15	-0.0497891	0.996652	1.24524	0.0614095	-1.5346	0.619529	NO
mmu-miR-671-5p	ENSMUSG00000037103	Dcaf15	-0.0497891	0.996652	-0.658749	0.352425	-1.92348	0.54595	NO
mmu-miR-34b-3p	ENSMUSG00000012889	Podnl1	-0.247382	0.996652	-0.236776	0.643843	-2.05237	0.19094	NO
mmu-miR-331-3p	ENSMUSG00000012889	Podnl1	-0.247382	0.996652	-2.04862	0.000874315	-1.512	0.0611883	NO
mmu-miR-151-3p	ENSMUSG00000012889	Podnl1	-0.247382	0.996652	0.150024	0.579751	-0.191302	0.306068	NO
mmu-miR-666-3p	ENSMUSG00000012889	Podnl1	-0.247382	0.996652	-0.157681	0.726433	-3.3675	0.194747	NO
mmu-miR-337-5p	ENSMUSG00000074215	Gm10643	-0.10333	0.996652	-0.0408363	0.833174	-1.33065	0.709559	NO
mmu-miR-188-5p	ENSMUSG00000074215	Gm10643	-0.10333	0.996652	-2.20972	0.318876	-1.16385	0.646532	NO
mmu-miR-337-5p	ENSMUSG00000045232	Rln3	0.653792	0.996652	-0.0408363	0.833174	-1.33065	0.709559	NO
mmu-miR-671-3p	ENSMUSG00000045232	Rln3	0.653792	0.996652	-0.383537	0.273755	-1.14401	0.674049	NO
mmu-miR-296-5p	ENSMUSG00000045232	Rln3	0.653792	0.996652	-1.3928	0.000171955	-3.00266	0.0124473	NO
mmu-miR-671-3p	ENSMUSG00000047986	Palm3	0.261716	0.996652	-0.383537	0.273755	-1.14401	0.674049	NO
mmu-miR-423-5p	ENSMUSG00000005465	Il27ra	0.305715	0.996652	0.208863	0.685655	-1.52058	0.609909	NO
mmu-miR-409-5p	ENSMUSG00000005465	Il27ra	0.305715	0.996652	1.24524	0.0614095	-1.5346	0.619529	NO
mmu-miR-296-5p	ENSMUSG00000005469	Prkaca	-0.121497	0.989841	-1.3928	0.000171955	-3.00266	0.0124473	NO
mmu-miR-151-3p	ENSMUSG00000005470	Asf1b	0.124764	0.996652	0.150024	0.579751	-0.191302	0.306068	NO
mmu-miR-34b-3p	ENSMUSG00000013033	Adgrl1	-0.09765	0.996652	-0.236776	0.643843	-2.05237	0.19094	NO
mmu-miR-423-5p	ENSMUSG00000013033	Adgrl1	-0.09765	0.996652	0.208863	0.685655	-1.52058	0.609909	NO
mmu-miR-501-3p	ENSMUSG00000013033	Adgrl1	-0.09765	0.996652	0.31491	0.302354	0.783282	0.221205	NO
mmu-miR-296-5p	ENSMUSG00000013033	Adgrl1	-0.09765	0.996652	-1.3928	0.000171955	-3.00266	0.0124473	NO
mmu-miR-331-3p	ENSMUSG00000074219	Gm10644	0.276223	0.996652	-2.04862	0.000874315	-1.512	0.0611883	NO
mmu-miR-501-3p	ENSMUSG00000002885	Adgre5	0.0698767	0.996652	0.31491	0.302354	0.783282	0.221205	NO
mmu-miR-188-5p	ENSMUSG00000002885	Adgre5	0.0698767	0.996652	-2.20972	0.318876	-1.16385	0.646532	NO
mmu-miR-34b-3p	ENSMUSG00000005481	Ddx39a	-0.120385	0.996652	-0.236776	0.643843	-2.05237	0.19094	NO
mmu-miR-532-5p	ENSMUSG00000019433	Gipc1	-0.0656431	0.996652	-0.0375693	0.883907	-2.41669	0.0677441	NO
mmu-miR-671-5p	ENSMUSG00000019433	Gipc1	-0.0656431	0.996652	-0.658749	0.352425	-1.92348	0.54595	NO
mmu-miR-673-5p	ENSMUSG00000005483	Dnajb1	-0.10386	0.996652	-0.264954	0.536775	-0.680037	0.0343531	NO
mmu-miR-139-5p	ENSMUSG00000005483	Dnajb1	-0.10386	0.996652	-0.0705343	0.816628	-0.955541	0.548138	NO
mmu-miR-331-3p	ENSMUSG00000005483	Dnajb1	-0.10386	0.996652	-2.04862	0.000874315	-1.512	0.0611883	NO
mmu-miR-139-5p	ENSMUSG00000031708	Tecr	-0.154236	0.811878	-0.0705343	0.816628	-0.955541	0.548138	NO
mmu-miR-673-5p	ENSMUSG00000047286	Or10k2	NA	NA	-0.264954	0.536775	-0.680037	0.0343531	NO
mmu-miR-671-5p	ENSMUSG00000047286	Or10k2	NA	NA	-0.658749	0.352425	-1.92348	0.54595	NO
mmu-miR-342-3p	ENSMUSG00000063253	Scoc	-0.0684519	0.996652	-0.153595	0.696257	-1.76212	0.42733	NO
mmu-miR-338-3p	ENSMUSG00000031710	Ucp1	-1.17209	0.996652	0.807797	0.0377321	0.545226	0.240263	NO
mmu-miR-369-3p	ENSMUSG00000031709	Tbc1d9	-0.00942156	0.996652	0.217237	0.643052	0.479301	0.884751	NO
mmu-miR-34b-3p	ENSMUSG00000031712	Il15	-0.0285858	0.998373	-0.236776	0.643843	-2.05237	0.19094	NO
mmu-miR-369-5p	ENSMUSG00000031712	Il15	-0.0285858	0.998373	-0.0348029	0.908875	-0.633128	0.521823	NO
mmu-miR-188-5p	ENSMUSG00000031681	Smad1	-0.0684805	0.996652	-2.20972	0.318876	-1.16385	0.646532	NO
mmu-miR-671-5p	ENSMUSG00000031682	1700011L22Rik	0.286133	0.996652	-0.658749	0.352425	-1.92348	0.54595	NO
mmu-miR-369-3p	ENSMUSG00000071064	Zfp827	-0.102183	0.996652	0.217237	0.643052	0.479301	0.884751	NO
mmu-miR-574-3p	ENSMUSG00000031684	Slc10a7	0.259894	0.931146	-1.00306	0.0201434	3.42572	0.263154	NO
mmu-miR-409-5p	ENSMUSG00000031684	Slc10a7	0.259894	0.931146	1.24524	0.0614095	-1.5346	0.619529	NO
mmu-miR-574-3p	ENSMUSG00000031620	Iqcm	-0.0879112	0.996652	-1.00306	0.0201434	3.42572	0.263154	NO
mmu-miR-673-5p	ENSMUSG00000005413	Hmox1	0.0165217	0.998373	-0.264954	0.536775	-0.680037	0.0343531	NO
mmu-miR-188-5p	ENSMUSG00000005413	Hmox1	0.0165217	0.998373	-2.20972	0.318876	-1.16385	0.646532	NO
mmu-miR-342-3p	ENSMUSG00000005413	Hmox1	0.0165217	0.998373	-0.153595	0.696257	-1.76212	0.42733	NO
mmu-miR-666-3p	ENSMUSG00000005413	Hmox1	0.0165217	0.998373	-0.157681	0.726433	-3.3675	0.194747	NO
mmu-miR-666-3p	ENSMUSG00000042870	Tom1	-0.0773923	0.996652	-0.157681	0.726433	-3.3675	0.194747	NO
mmu-miR-574-3p	ENSMUSG00000034518	Hmgxb4	-0.0505263	0.996652	-1.00306	0.0201434	3.42572	0.263154	NO
mmu-miR-671-3p	ENSMUSG00000034518	Hmgxb4	-0.0505263	0.996652	-0.383537	0.273755	-1.14401	0.674049	NO
mmu-miR-532-5p	ENSMUSG00000031621	Isx	1.10921	0.996652	-0.0375693	0.883907	-2.41669	0.0677441	NO
mmu-miR-139-5p	ENSMUSG00000050147	F2rl3	0.329197	0.996652	-0.0705343	0.816628	-0.955541	0.548138	NO
mmu-miR-188-5p	ENSMUSG00000050147	F2rl3	0.329197	0.996652	-2.20972	0.318876	-1.16385	0.646532	NO
mmu-miR-423-5p	ENSMUSG00000031622	Sin3b	0.0247474	0.996652	0.208863	0.685655	-1.52058	0.609909	NO
mmu-miR-671-5p	ENSMUSG00000031622	Sin3b	0.0247474	0.996652	-0.658749	0.352425	-1.92348	0.54595	NO
mmu-miR-296-5p	ENSMUSG00000031622	Sin3b	0.0247474	0.996652	-1.3928	0.000171955	-3.00266	0.0124473	NO
mmu-miR-574-3p	ENSMUSG00000048148	Nwd1	-0.00271344	0.99841	-1.00306	0.0201434	3.42572	0.263154	NO
mmu-miR-673-5p	ENSMUSG00000048148	Nwd1	-0.00271344	0.99841	-0.264954	0.536775	-0.680037	0.0343531	NO
mmu-miR-338-3p	ENSMUSG00000048148	Nwd1	-0.00271344	0.99841	0.807797	0.0377321	0.545226	0.240263	NO
mmu-miR-151-3p	ENSMUSG00000031791	Tmem38a	-0.101228	0.996652	0.150024	0.579751	-0.191302	0.306068	NO
mmu-miR-139-3p	ENSMUSG00000044600	Smim7	-0.0784935	0.996652	-0.176213	0.806923	-0.797117	0.298897	NO
mmu-miR-574-3p	ENSMUSG00000052488	Cherp	-0.0605812	0.996652	-1.00306	0.0201434	3.42572	0.263154	NO
mmu-miR-671-3p	ENSMUSG00000055148	Klf2	0.60241	0.460782	-0.383537	0.273755	-1.14401	0.674049	NO
mmu-miR-671-3p	ENSMUSG00000069996	Gm41341	-0.871041	0.996652	-0.383537	0.273755	-1.14401	0.674049	NO
mmu-miR-337-5p	ENSMUSG00000003039	Fam32a	-0.1618	0.987023	-0.0408363	0.833174	-1.33065	0.709559	NO
mmu-miR-296-5p	ENSMUSG00000003037	Rab8a	-0.0350557	0.996652	-1.3928	0.000171955	-3.00266	0.0124473	NO
mmu-miR-423-3p	ENSMUSG00000031799	Tpm4	0.0323966	0.996652	-0.606918	0.275113	-0.977902	0.338619	NO
mmu-miR-409-5p	ENSMUSG00000031799	Tpm4	0.0323966	0.996652	1.24524	0.0614095	-1.5346	0.619529	NO
mmu-miR-338-3p	ENSMUSG00000070000	Fcho1	-0.187257	0.809784	0.807797	0.0377321	0.545226	0.240263	NO
mmu-miR-423-3p	ENSMUSG00000031803	B3gnt3	-0.0708766	0.996652	-0.606918	0.275113	-0.977902	0.338619	NO
mmu-miR-151-3p	ENSMUSG00000079019	Insl3	-2.15286	0.996652	0.150024	0.579751	-0.191302	0.306068	NO
mmu-miR-151-3p	ENSMUSG00000031805	Jak3	0.174152	0.996652	0.150024	0.579751	-0.191302	0.306068	NO
mmu-miR-671-5p	ENSMUSG00000031805	Jak3	0.174152	0.996652	-0.658749	0.352425	-1.92348	0.54595	NO
mmu-miR-139-3p	ENSMUSG00000034799	Unc13a	-0.0555746	0.996652	-0.176213	0.806923	-0.797117	0.298897	NO
mmu-miR-423-5p	ENSMUSG00000034799	Unc13a	-0.0555746	0.996652	0.208863	0.685655	-1.52058	0.609909	NO
mmu-miR-337-5p	ENSMUSG00000031807	Pgls	0.0830892	0.996652	-0.0408363	0.833174	-1.33065	0.709559	NO
mmu-miR-673-5p	ENSMUSG00000031808	Slc27a1	0.0147092	0.996652	-0.264954	0.536775	-0.680037	0.0343531	NO
mmu-miR-671-3p	ENSMUSG00000031808	Slc27a1	0.0147092	0.996652	-0.383537	0.273755	-1.14401	0.674049	NO
mmu-miR-296-5p	ENSMUSG00000031808	Slc27a1	0.0147092	0.996652	-1.3928	0.000171955	-3.00266	0.0124473	NO
mmu-miR-423-3p	ENSMUSG00000046718	Bst2	0.489038	0.996652	-0.606918	0.275113	-0.977902	0.338619	NO
mmu-miR-331-3p	ENSMUSG00000046718	Bst2	0.489038	0.996652	-2.04862	0.000874315	-1.512	0.0611883	NO
mmu-miR-296-5p	ENSMUSG00000046718	Bst2	0.489038	0.996652	-1.3928	0.000171955	-3.00266	0.0124473	NO
mmu-miR-501-3p	ENSMUSG00000031813	Mvb12a	-0.00406467	0.99841	0.31491	0.302354	0.783282	0.221205	NO
mmu-miR-574-3p	ENSMUSG00000043664	Tmem221	1.91005	0.996652	-1.00306	0.0201434	3.42572	0.263154	NO
mmu-miR-331-3p	ENSMUSG00000043664	Tmem221	1.91005	0.996652	-2.04862	0.000874315	-1.512	0.0611883	NO
mmu-miR-574-3p	ENSMUSG00000034845	Plvap	-0.124764	0.996652	-1.00306	0.0201434	3.42572	0.263154	NO
mmu-miR-673-5p	ENSMUSG00000034845	Plvap	-0.124764	0.996652	-0.264954	0.536775	-0.680037	0.0343531	NO
mmu-miR-671-5p	ENSMUSG00000034845	Plvap	-0.124764	0.996652	-0.658749	0.352425	-1.92348	0.54595	NO
mmu-miR-673-5p	ENSMUSG00000007610	Gtpbp3	-0.107874	0.996652	-0.264954	0.536775	-0.680037	0.0343531	NO
mmu-miR-666-3p	ENSMUSG00000007610	Gtpbp3	-0.107874	0.996652	-0.157681	0.726433	-3.3675	0.194747	NO
mmu-miR-532-5p	ENSMUSG00000007610	Gtpbp3	-0.107874	0.996652	-0.0375693	0.883907	-2.41669	0.0677441	NO
mmu-miR-423-3p	ENSMUSG00000034863	Ano8	0.0252547	0.996652	-0.606918	0.275113	-0.977902	0.338619	NO
mmu-miR-337-5p	ENSMUSG00000034863	Ano8	0.0252547	0.996652	-0.0408363	0.833174	-1.33065	0.709559	NO
mmu-miR-331-3p	ENSMUSG00000034863	Ano8	0.0252547	0.996652	-2.04862	0.000874315	-1.512	0.0611883	NO
mmu-miR-671-3p	ENSMUSG00000034863	Ano8	0.0252547	0.996652	-0.383537	0.273755	-1.14401	0.674049	NO
mmu-miR-296-5p	ENSMUSG00000034863	Ano8	0.0252547	0.996652	-1.3928	0.000171955	-3.00266	0.0124473	NO
mmu-miR-666-3p	ENSMUSG00000034863	Ano8	0.0252547	0.996652	-0.157681	0.726433	-3.3675	0.194747	NO
mmu-miR-139-3p	ENSMUSG00000034880	Mrpl34	-0.0966411	0.996652	-0.176213	0.806923	-0.797117	0.298897	NO
mmu-miR-532-5p	ENSMUSG00000034880	Mrpl34	-0.0966411	0.996652	-0.0375693	0.883907	-2.41669	0.0677441	NO
mmu-miR-423-3p	ENSMUSG00000074247	Dda1	-0.0785095	0.996652	-0.606918	0.275113	-0.977902	0.338619	NO
mmu-miR-423-3p	ENSMUSG00000007950	Abhd8	-0.16185	0.984051	-0.606918	0.275113	-0.977902	0.338619	NO
mmu-miR-139-3p	ENSMUSG00000034911	Ushbp1	0.0834104	0.996652	-0.176213	0.806923	-0.797117	0.298897	NO
mmu-miR-151-5p	ENSMUSG00000002396	Ocel1	-0.0178486	0.996652	-0.0473167	0.801413	0.0282668	0.900961	NO
mmu-miR-532-5p	ENSMUSG00000002393	Nr2f6	-0.251086	0.996652	-0.0375693	0.883907	-2.41669	0.0677441	NO
mmu-miR-296-5p	ENSMUSG00000002393	Nr2f6	-0.251086	0.996652	-1.3928	0.000171955	-3.00266	0.0124473	NO
mmu-miR-666-3p	ENSMUSG00000002393	Nr2f6	-0.251086	0.996652	-0.157681	0.726433	-3.3675	0.194747	NO
mmu-miR-423-3p	ENSMUSG00000035439	Haus8	0.164354	0.996652	-0.606918	0.275113	-0.977902	0.338619	NO
mmu-miR-139-5p	ENSMUSG00000035439	Haus8	0.164354	0.996652	-0.0705343	0.816628	-0.955541	0.548138	NO
mmu-miR-673-5p	ENSMUSG00000019261	Map1s	-0.0512338	0.996652	-0.264954	0.536775	-0.680037	0.0343531	NO
mmu-miR-671-5p	ENSMUSG00000019261	Map1s	-0.0512338	0.996652	-0.658749	0.352425	-1.92348	0.54595	NO
mmu-miR-666-3p	ENSMUSG00000019261	Map1s	-0.0512338	0.996652	-0.157681	0.726433	-3.3675	0.194747	NO
mmu-miR-673-5p	ENSMUSG00000007721	Ccdc124	-0.119442	0.996652	-0.264954	0.536775	-0.680037	0.0343531	NO
mmu-miR-666-3p	ENSMUSG00000007721	Ccdc124	-0.119442	0.996652	-0.157681	0.726433	-3.3675	0.194747	NO
mmu-miR-671-3p	ENSMUSG00000020887	A230052G05Rik	-0.660176	0.996652	-0.383537	0.273755	-1.14401	0.674049	NO
mmu-miR-673-5p	ENSMUSG00000002910	Arrdc2	-0.0902517	0.996652	-0.264954	0.536775	-0.680037	0.0343531	NO
mmu-miR-409-5p	ENSMUSG00000000791	Il12rb1	-0.734627	0.996652	1.24524	0.0614095	-1.5346	0.619529	NO
mmu-miR-296-5p	ENSMUSG00000000791	Il12rb1	-0.734627	0.996652	-1.3928	0.000171955	-3.00266	0.0124473	NO
mmu-miR-337-5p	ENSMUSG00000031834	Pik3r2	-0.17083	0.836934	-0.0408363	0.833174	-1.33065	0.709559	NO
mmu-miR-666-3p	ENSMUSG00000031834	Pik3r2	-0.17083	0.836934	-0.157681	0.726433	-3.3675	0.194747	NO
mmu-miR-423-5p	ENSMUSG00000035559	Mpv17l2	-0.0158843	0.996652	0.208863	0.685655	-1.52058	0.609909	NO
mmu-miR-671-5p	ENSMUSG00000035559	Mpv17l2	-0.0158843	0.996652	-0.658749	0.352425	-1.92348	0.54595	NO
mmu-miR-296-5p	ENSMUSG00000035559	Mpv17l2	-0.0158843	0.996652	-1.3928	0.000171955	-3.00266	0.0124473	NO
mmu-miR-331-3p	ENSMUSG00000031840	Rab3a	-0.156935	0.808856	-2.04862	0.000874315	-1.512	0.0611883	NO
mmu-miR-666-3p	ENSMUSG00000031840	Rab3a	-0.156935	0.808856	-0.157681	0.726433	-3.3675	0.194747	NO
mmu-miR-574-3p	ENSMUSG00000071076	Jund	-0.195511	0.948563	-1.00306	0.0201434	3.42572	0.263154	NO
mmu-miR-139-3p	ENSMUSG00000031842	Pde4c	0.0407468	0.996652	-0.176213	0.806923	-0.797117	0.298897	NO
mmu-miR-501-3p	ENSMUSG00000031842	Pde4c	0.0407468	0.996652	0.31491	0.302354	0.783282	0.221205	NO
mmu-miR-501-3p	ENSMUSG00000031848	Lsm4	-0.0801704	0.996652	0.31491	0.302354	0.783282	0.221205	NO
mmu-miR-423-5p	ENSMUSG00000038508	Gdf15	0.89828	0.996652	0.208863	0.685655	-1.52058	0.609909	NO
mmu-miR-331-3p	ENSMUSG00000070003	Ssbp4	-0.136732	0.996652	-2.04862	0.000874315	-1.512	0.0611883	NO
mmu-miR-151-5p	ENSMUSG00000049988	Lrrc25	-0.187812	0.996652	-0.0473167	0.801413	0.0282668	0.900961	NO
mmu-miR-574-3p	ENSMUSG00000070002	Ell	-0.0106467	0.996652	-1.00306	0.0201434	3.42572	0.263154	NO
mmu-miR-673-5p	ENSMUSG00000019428	Fkbp8	-0.159759	0.898538	-0.264954	0.536775	-0.680037	0.0343531	NO
mmu-miR-671-5p	ENSMUSG00000019428	Fkbp8	-0.159759	0.898538	-0.658749	0.352425	-1.92348	0.54595	NO
mmu-miR-423-3p	ENSMUSG00000055553	Kxd1	-0.173811	0.996652	-0.606918	0.275113	-0.977902	0.338619	NO
mmu-miR-409-5p	ENSMUSG00000055553	Kxd1	-0.173811	0.996652	1.24524	0.0614095	-1.5346	0.619529	NO
mmu-miR-369-5p	ENSMUSG00000055553	Kxd1	-0.173811	0.996652	-0.0348029	0.908875	-0.633128	0.521823	NO
mmu-miR-331-3p	ENSMUSG00000035964	Tmem59l	-0.0545087	0.996652	-2.04862	0.000874315	-1.512	0.0611883	NO
mmu-miR-151-5p	ENSMUSG00000035964	Tmem59l	-0.0545087	0.996652	-0.0473167	0.801413	0.0282668	0.900961	NO
mmu-miR-296-5p	ENSMUSG00000035964	Tmem59l	-0.0545087	0.996652	-1.3928	0.000171955	-3.00266	0.0124473	NO
mmu-miR-188-5p	ENSMUSG00000031849	Comp	-0.238149	0.996652	-2.20972	0.318876	-1.16385	0.646532	NO
mmu-miR-342-3p	ENSMUSG00000031849	Comp	-0.238149	0.996652	-0.153595	0.696257	-1.76212	0.42733	NO
mmu-miR-296-5p	ENSMUSG00000031849	Comp	-0.238149	0.996652	-1.3928	0.000171955	-3.00266	0.0124473	NO
mmu-miR-409-5p	ENSMUSG00000055681	Cope	-0.108485	0.996652	1.24524	0.0614095	-1.5346	0.619529	NO
mmu-miR-331-3p	ENSMUSG00000003573	Homer3	0.139863	0.996652	-2.04862	0.000874315	-1.512	0.0611883	NO
mmu-miR-574-3p	ENSMUSG00000003573	Homer3	0.139863	0.996652	-1.00306	0.0201434	3.42572	0.263154	NO
mmu-miR-139-3p	ENSMUSG00000002343	Armc6	-0.155013	0.996652	-0.176213	0.806923	-0.797117	0.298897	NO
mmu-miR-139-5p	ENSMUSG00000002343	Armc6	-0.155013	0.996652	-0.0705343	0.816628	-0.955541	0.548138	NO
mmu-miR-296-5p	ENSMUSG00000002343	Armc6	-0.155013	0.996652	-1.3928	0.000171955	-3.00266	0.0124473	NO
mmu-miR-666-3p	ENSMUSG00000002343	Armc6	-0.155013	0.996652	-0.157681	0.726433	-3.3675	0.194747	NO
mmu-miR-673-5p	ENSMUSG00000002342	Tmem161a	-0.110547	0.996652	-0.264954	0.536775	-0.680037	0.0343531	NO
mmu-miR-671-3p	ENSMUSG00000071078	Nr2c2ap	-0.362896	0.996652	-0.383537	0.273755	-1.14401	0.674049	NO
mmu-miR-139-3p	ENSMUSG00000036120	Rfxank	0.0529308	0.996652	-0.176213	0.806923	-0.797117	0.298897	NO
mmu-miR-409-5p	ENSMUSG00000036120	Rfxank	0.0529308	0.996652	1.24524	0.0614095	-1.5346	0.619529	NO
mmu-miR-671-3p	ENSMUSG00000036120	Rfxank	0.0529308	0.996652	-0.383537	0.273755	-1.14401	0.674049	NO
mmu-miR-369-3p	ENSMUSG00000011306	Sugp1	-0.0893778	0.996652	0.217237	0.643052	0.479301	0.884751	NO
mmu-miR-151-3p	ENSMUSG00000036180	Gatad2a	-0.0599689	0.996652	0.150024	0.579751	-0.191302	0.306068	NO
mmu-miR-337-5p	ENSMUSG00000047654	Tssk6	-0.243295	0.996652	-0.0408363	0.833174	-1.33065	0.709559	NO
mmu-miR-409-5p	ENSMUSG00000031860	Pbx4	-0.0187351	0.996652	1.24524	0.0614095	-1.5346	0.619529	NO
mmu-miR-666-3p	ENSMUSG00000031860	Pbx4	-0.0187351	0.996652	-0.157681	0.726433	-3.3675	0.194747	NO
mmu-miR-666-3p	ENSMUSG00000036246	Gmip	0.136117	0.996652	-0.157681	0.726433	-3.3675	0.194747	NO
mmu-miR-423-3p	ENSMUSG00000031862	Atp13a1	-0.0549435	0.996652	-0.606918	0.275113	-0.977902	0.338619	NO
mmu-miR-296-5p	ENSMUSG00000031862	Atp13a1	-0.0549435	0.996652	-1.3928	0.000171955	-3.00266	0.0124473	NO
mmu-miR-673-5p	ENSMUSG00000054648	Zfp869	0.0358029	0.996652	-0.264954	0.536775	-0.680037	0.0343531	NO
mmu-miR-338-3p	ENSMUSG00000054648	Zfp869	0.0358029	0.996652	0.807797	0.0377321	0.545226	0.240263	NO
mmu-miR-139-5p	ENSMUSG00000060427	Zfp868	-0.156468	0.996652	-0.0705343	0.816628	-0.955541	0.548138	NO
mmu-miR-409-5p	ENSMUSG00000079038	Zfp781a	0.174481	0.867884	1.24524	0.0614095	-1.5346	0.619529	NO
mmu-miR-423-5p	ENSMUSG00000036306	Lzts1	-0.243346	0.170777	0.208863	0.685655	-1.52058	0.609909	NO
mmu-miR-671-3p	ENSMUSG00000036306	Lzts1	-0.243346	0.170777	-0.383537	0.273755	-1.14401	0.674049	NO
mmu-miR-666-3p	ENSMUSG00000036306	Lzts1	-0.243346	0.170777	-0.157681	0.726433	-3.3675	0.194747	NO
mmu-miR-34b-3p	ENSMUSG00000015568	Lpl	-0.131909	0.996652	-0.236776	0.643843	-2.05237	0.19094	NO
mmu-miR-574-3p	ENSMUSG00000053886	Sh2d4a	0.0991401	0.996652	-1.00306	0.0201434	3.42572	0.263154	NO
mmu-miR-139-5p	ENSMUSG00000053886	Sh2d4a	0.0991401	0.996652	-0.0705343	0.816628	-0.955541	0.548138	NO
mmu-miR-409-5p	ENSMUSG00000030465	Psd3	-0.101857	0.996652	1.24524	0.0614095	-1.5346	0.619529	NO
mmu-miR-188-5p	ENSMUSG00000030465	Psd3	-0.101857	0.996652	-2.20972	0.318876	-1.16385	0.646532	NO
mmu-miR-338-3p	ENSMUSG00000030465	Psd3	-0.101857	0.996652	0.807797	0.0377321	0.545226	0.240263	NO
mmu-miR-369-5p	ENSMUSG00000044014	Npy5r	-0.187066	0.996652	-0.0348029	0.908875	-0.633128	0.521823	NO
mmu-miR-151-3p	ENSMUSG00000025591	Tma16	-0.112898	0.996652	0.150024	0.579751	-0.191302	0.306068	NO
mmu-miR-188-5p	ENSMUSG00000074300	Smim31	2.76528	0.953283	-2.20972	0.318876	-1.16385	0.646532	NO
mmu-miR-369-3p	ENSMUSG00000074300	Smim31	2.76528	0.953283	0.217237	0.643052	0.479301	0.884751	NO
mmu-miR-338-3p	ENSMUSG00000025521	Tmem192	-0.0969092	0.996652	0.807797	0.0377321	0.545226	0.240263	NO
mmu-miR-671-3p	ENSMUSG00000025521	Tmem192	-0.0969092	0.996652	-0.383537	0.273755	-1.14401	0.674049	NO
mmu-miR-139-5p	ENSMUSG00000037852	Cpe	-0.0478465	0.996652	-0.0705343	0.816628	-0.955541	0.548138	NO
mmu-miR-532-5p	ENSMUSG00000031641	Cbr4	0.112712	0.996652	-0.0375693	0.883907	-2.41669	0.0677441	NO
mmu-miR-151-5p	ENSMUSG00000031644	Nek1	0.0358917	0.996652	-0.0473167	0.801413	0.0282668	0.900961	NO
mmu-miR-532-5p	ENSMUSG00000038005	Hpf1	-0.048732	0.996652	-0.0375693	0.883907	-2.41669	0.0677441	NO
mmu-miR-139-5p	ENSMUSG00000031647	Mfap3l	-0.0776947	0.996652	-0.0705343	0.816628	-0.955541	0.548138	NO
mmu-miR-337-5p	ENSMUSG00000031647	Mfap3l	-0.0776947	0.996652	-0.0408363	0.833174	-1.33065	0.709559	NO
mmu-miR-296-5p	ENSMUSG00000031647	Mfap3l	-0.0776947	0.996652	-1.3928	0.000171955	-3.00266	0.0124473	NO
mmu-miR-423-3p	ENSMUSG00000031609	Sap30	-0.0676453	0.996652	-0.606918	0.275113	-0.977902	0.338619	NO
mmu-miR-337-5p	ENSMUSG00000031609	Sap30	-0.0676453	0.996652	-0.0408363	0.833174	-1.33065	0.709559	NO
mmu-miR-671-3p	ENSMUSG00000038193	Hand2	NA	NA	-0.383537	0.273755	-1.14401	0.674049	NO
mmu-miR-423-5p	ENSMUSG00000046258	Adam29	NA	NA	0.208863	0.685655	-1.52058	0.609909	NO
mmu-miR-151-5p	ENSMUSG00000046258	Adam29	NA	NA	-0.0473167	0.801413	0.0282668	0.900961	NO
mmu-miR-369-3p	ENSMUSG00000031520	Vegfc	0.385143	0.996652	0.217237	0.643052	0.479301	0.884751	NO
mmu-miR-139-3p	ENSMUSG00000031562	Dctd	-0.0233637	0.996652	-0.176213	0.806923	-0.797117	0.298897	NO
mmu-miR-671-3p	ENSMUSG00000061974	Cldn24	0.00282954	0.999793	-0.383537	0.273755	-1.14401	0.674049	NO
mmu-miR-188-5p	ENSMUSG00000074357	AA386476	0.263965	0.996652	-2.20972	0.318876	-1.16385	0.646532	NO
mmu-miR-342-3p	ENSMUSG00000074357	AA386476	0.263965	0.996652	-0.153595	0.696257	-1.76212	0.42733	NO
mmu-miR-574-3p	ENSMUSG00000031568	Rwdd4a	-0.0577001	0.996652	-1.00306	0.0201434	3.42572	0.263154	NO
mmu-miR-34b-3p	ENSMUSG00000038102	Trappc11	-0.0227082	0.996652	-0.236776	0.643843	-2.05237	0.19094	NO
mmu-miR-574-3p	ENSMUSG00000031629	Cenpu	0.125262	0.996652	-1.00306	0.0201434	3.42572	0.263154	NO
mmu-miR-338-3p	ENSMUSG00000031633	Slc25a4	-0.095308	0.996652	0.807797	0.0377321	0.545226	0.240263	NO
mmu-miR-369-5p	ENSMUSG00000038291	Snx25	-0.0825207	0.996652	-0.0348029	0.908875	-0.633128	0.521823	NO
mmu-miR-673-5p	ENSMUSG00000031634	Ufsp2	-0.0395309	0.996652	-0.264954	0.536775	-0.680037	0.0343531	NO
mmu-miR-337-5p	ENSMUSG00000071103	Cfap96	0.0959655	0.996652	-0.0408363	0.833174	-1.33065	0.709559	NO
mmu-miR-369-3p	ENSMUSG00000031636	Pdlim3	-0.368229	0.996652	0.217237	0.643052	0.479301	0.884751	NO
mmu-miR-532-5p	ENSMUSG00000109764	Klkb1	-0.601501	0.996652	-0.0375693	0.883907	-2.41669	0.0677441	NO
mmu-miR-369-5p	ENSMUSG00000109764	Klkb1	-0.601501	0.996652	-0.0348029	0.908875	-0.633128	0.521823	NO
mmu-miR-139-3p	ENSMUSG00000031645	F11	0.765621	0.996652	-0.176213	0.806923	-0.797117	0.298897	NO
mmu-miR-139-5p	ENSMUSG00000031645	F11	0.765621	0.996652	-0.0705343	0.816628	-0.955541	0.548138	NO
mmu-miR-151-3p	ENSMUSG00000054764	Mtnr1a	2.11726	0.996652	0.150024	0.579751	-0.191302	0.306068	NO
mmu-miR-337-5p	ENSMUSG00000070047	Fat1	0.018679	0.996652	-0.0408363	0.833174	-1.33065	0.709559	NO
mmu-miR-188-5p	ENSMUSG00000051176	Zfp42	-0.604369	0.996652	-2.20972	0.318876	-1.16385	0.646532	NO
mmu-miR-369-5p	ENSMUSG00000051176	Zfp42	-0.604369	0.996652	-0.0348029	0.908875	-0.633128	0.521823	NO
mmu-miR-532-5p	ENSMUSG00000031651	Triml1	NA	NA	-0.0375693	0.883907	-2.41669	0.0677441	NO
mmu-miR-369-5p	ENSMUSG00000031651	Triml1	NA	NA	-0.0348029	0.908875	-0.633128	0.521823	NO
mmu-miR-574-3p	ENSMUSG00000031592	Pcm1	-0.0866082	0.996652	-1.00306	0.0201434	3.42572	0.263154	NO
mmu-miR-338-3p	ENSMUSG00000045636	Mtus1	0.0118143	0.996652	0.807797	0.0377321	0.545226	0.240263	NO
mmu-miR-139-3p	ENSMUSG00000031595	Pdgfrl	0.285352	0.996652	-0.176213	0.806923	-0.797117	0.298897	NO
mmu-miR-151-3p	ENSMUSG00000031595	Pdgfrl	0.285352	0.996652	0.150024	0.579751	-0.191302	0.306068	NO
mmu-miR-574-3p	ENSMUSG00000031596	Slc7a2	-0.112009	0.996652	-1.00306	0.0201434	3.42572	0.263154	NO
mmu-miR-34b-3p	ENSMUSG00000031596	Slc7a2	-0.112009	0.996652	-0.236776	0.643843	-2.05237	0.19094	NO
mmu-miR-369-3p	ENSMUSG00000071937	Adam25	NA	NA	0.217237	0.643052	0.479301	0.884751	NO
mmu-miR-409-5p	ENSMUSG00000046723	Adam24	NA	NA	1.24524	0.0614095	-1.5346	0.619529	NO
mmu-miR-369-3p	ENSMUSG00000046723	Adam24	NA	NA	0.217237	0.643052	0.479301	0.884751	NO
mmu-miR-342-3p	ENSMUSG00000046723	Adam24	NA	NA	-0.153595	0.696257	-1.76212	0.42733	NO
mmu-miR-151-5p	ENSMUSG00000046723	Adam24	NA	NA	-0.0473167	0.801413	0.0282668	0.900961	NO
mmu-miR-34b-3p	ENSMUSG00000039431	Mtmr7	-0.213975	0.318476	-0.236776	0.643843	-2.05237	0.19094	NO
mmu-miR-139-5p	ENSMUSG00000031603	Fgf20	NA	NA	-0.0705343	0.816628	-0.955541	0.548138	NO
mmu-miR-337-5p	ENSMUSG00000031603	Fgf20	NA	NA	-0.0408363	0.833174	-1.33065	0.709559	NO
mmu-miR-34b-3p	ENSMUSG00000074384	AI429214	-0.244248	0.996652	-0.236776	0.643843	-2.05237	0.19094	NO
mmu-miR-188-5p	ENSMUSG00000074384	AI429214	-0.244248	0.996652	-2.20972	0.318876	-1.16385	0.646532	NO
mmu-miR-338-3p	ENSMUSG00000074384	AI429214	-0.244248	0.996652	0.807797	0.0377321	0.545226	0.240263	NO
mmu-miR-574-3p	ENSMUSG00000031523	Dlc1	-0.159482	0.782897	-1.00306	0.0201434	3.42572	0.263154	NO
mmu-miR-139-5p	ENSMUSG00000031523	Dlc1	-0.159482	0.782897	-0.0705343	0.816628	-0.955541	0.548138	NO
mmu-miR-188-5p	ENSMUSG00000031523	Dlc1	-0.159482	0.782897	-2.20972	0.318876	-1.16385	0.646532	NO
mmu-miR-501-3p	ENSMUSG00000055976	Cldn23	-0.64948	0.996652	0.31491	0.302354	0.783282	0.221205	NO
mmu-miR-151-5p	ENSMUSG00000046794	Ppp1r3b	0.695004	0.560802	-0.0473167	0.801413	0.0282668	0.900961	NO
mmu-miR-139-3p	ENSMUSG00000031530	Dusp4	0.00544311	0.99841	-0.176213	0.806923	-0.797117	0.298897	NO
mmu-miR-423-3p	ENSMUSG00000031532	Saraf	-0.0862425	0.996652	-0.606918	0.275113	-0.977902	0.338619	NO
mmu-miR-337-5p	ENSMUSG00000031532	Saraf	-0.0862425	0.996652	-0.0408363	0.833174	-1.33065	0.709559	NO
mmu-miR-369-3p	ENSMUSG00000031586	Rbpms	0.203192	0.996652	0.217237	0.643052	0.479301	0.884751	NO
mmu-miR-574-3p	ENSMUSG00000049476	1700104B16Rik	-1.15342	0.996652	-1.00306	0.0201434	3.42572	0.263154	NO
mmu-miR-338-3p	ENSMUSG00000031584	Gsr	-0.127065	0.996652	0.807797	0.0377321	0.545226	0.240263	NO
mmu-miR-139-3p	ENSMUSG00000009630	Ppp2cb	-0.139368	0.996652	-0.176213	0.806923	-0.797117	0.298897	NO
mmu-miR-423-5p	ENSMUSG00000031577	Tti2	-0.0493181	0.996652	0.208863	0.685655	-1.52058	0.609909	NO
mmu-miR-369-5p	ENSMUSG00000039661	Dusp26	-0.32837	0.248035	-0.0348029	0.908875	-0.633128	0.521823	NO
mmu-miR-342-3p	ENSMUSG00000039661	Dusp26	-0.32837	0.248035	-0.153595	0.696257	-1.76212	0.42733	NO
mmu-miR-671-5p	ENSMUSG00000039661	Dusp26	-0.32837	0.248035	-0.658749	0.352425	-1.92348	0.54595	NO
mmu-miR-532-5p	ENSMUSG00000063932	Poteg	NA	NA	-0.0375693	0.883907	-2.41669	0.0677441	NO
mmu-miR-666-3p	ENSMUSG00000031491	Chrna6	1.69993	0.996652	-0.157681	0.726433	-3.3675	0.194747	NO
mmu-miR-139-5p	ENSMUSG00000071138	Tex24	NA	NA	-0.0705343	0.816628	-0.955541	0.548138	NO
mmu-miR-423-3p	ENSMUSG00000031490	Eif4ebp1	-0.349671	0.996652	-0.606918	0.275113	-0.977902	0.338619	NO
mmu-miR-139-3p	ENSMUSG00000031489	Adrb3	0.77176	0.996652	-0.176213	0.806923	-0.797117	0.298897	NO
mmu-miR-409-5p	ENSMUSG00000031486	Adgra2	0.107728	0.996652	1.24524	0.0614095	-1.5346	0.619529	NO
mmu-miR-671-3p	ENSMUSG00000031486	Adgra2	0.107728	0.996652	-0.383537	0.273755	-1.14401	0.674049	NO
mmu-miR-34b-3p	ENSMUSG00000031487	Brf2	-0.207003	0.996652	-0.236776	0.643843	-2.05237	0.19094	NO
mmu-miR-501-3p	ENSMUSG00000031487	Brf2	-0.207003	0.996652	0.31491	0.302354	0.783282	0.221205	NO
mmu-miR-574-3p	ENSMUSG00000031485	Plpbp	-0.09993	0.996652	-1.00306	0.0201434	3.42572	0.263154	NO
mmu-miR-188-5p	ENSMUSG00000031485	Plpbp	-0.09993	0.996652	-2.20972	0.318876	-1.16385	0.646532	NO
mmu-miR-501-3p	ENSMUSG00000037234	Hook3	-0.0370373	0.996652	0.31491	0.302354	0.783282	0.221205	NO
mmu-miR-501-3p	ENSMUSG00000015994	Fnta	-0.0644205	0.996652	0.31491	0.302354	0.783282	0.221205	NO
mmu-miR-337-5p	ENSMUSG00000015994	Fnta	-0.0644205	0.996652	-0.0408363	0.833174	-1.33065	0.709559	NO
mmu-miR-409-5p	ENSMUSG00000015994	Fnta	-0.0644205	0.996652	1.24524	0.0614095	-1.5346	0.619529	NO
mmu-miR-188-5p	ENSMUSG00000037260	Hgsnat	-0.098431	0.996652	-2.20972	0.318876	-1.16385	0.646532	NO
mmu-miR-331-3p	ENSMUSG00000037260	Hgsnat	-0.098431	0.996652	-2.04862	0.000874315	-1.512	0.0611883	NO
mmu-miR-574-3p	ENSMUSG00000031576	Kcnu1	0.250222	0.996652	-1.00306	0.0201434	3.42572	0.263154	NO
mmu-miR-369-3p	ENSMUSG00000031576	Kcnu1	0.250222	0.996652	0.217237	0.643052	0.479301	0.884751	NO
mmu-miR-369-5p	ENSMUSG00000037363	Letm2	0.0052644	0.99841	-0.0348029	0.908875	-0.633128	0.521823	NO
mmu-miR-423-3p	ENSMUSG00000031565	Fgfr1	-0.0154984	0.996652	-0.606918	0.275113	-0.977902	0.338619	NO
mmu-miR-342-3p	ENSMUSG00000031565	Fgfr1	-0.0154984	0.996652	-0.153595	0.696257	-1.76212	0.42733	NO
mmu-miR-369-3p	ENSMUSG00000031556	Tm2d2	-0.0792429	0.996652	0.217237	0.643052	0.479301	0.884751	NO
mmu-miR-342-3p	ENSMUSG00000031556	Tm2d2	-0.0792429	0.996652	-0.153595	0.696257	-1.76212	0.42733	NO
mmu-miR-337-5p	ENSMUSG00000031554	Adam5	0.0863606	0.996652	-0.0408363	0.833174	-1.33065	0.709559	NO
mmu-miR-296-5p	ENSMUSG00000053979	A730045E13Rik	-0.410739	0.996652	-1.3928	0.000171955	-3.00266	0.0124473	NO
mmu-miR-671-5p	ENSMUSG00000031546	Gins4	-0.237707	0.948254	-0.658749	0.352425	-1.92348	0.54595	NO
mmu-miR-423-3p	ENSMUSG00000063672	Nkx6-3	-0.294041	0.996652	-0.606918	0.275113	-0.977902	0.338619	NO
mmu-miR-337-5p	ENSMUSG00000063672	Nkx6-3	-0.294041	0.996652	-0.0408363	0.833174	-1.33065	0.709559	NO
mmu-miR-666-3p	ENSMUSG00000063672	Nkx6-3	-0.294041	0.996652	-0.157681	0.726433	-3.3675	0.194747	NO
mmu-miR-337-5p	ENSMUSG00000031540	Kat6a	-0.0186973	0.996652	-0.0408363	0.833174	-1.33065	0.709559	NO
mmu-miR-574-3p	ENSMUSG00000054822	1700041G16Rik	0.374005	0.996652	-1.00306	0.0201434	3.42572	0.263154	NO
mmu-miR-369-3p	ENSMUSG00000031538	Plat	-0.097317	0.996652	0.217237	0.643052	0.479301	0.884751	NO
mmu-miR-151-3p	ENSMUSG00000031537	Ikbkb	0.173807	0.794468	0.150024	0.579751	-0.191302	0.306068	NO
mmu-miR-188-5p	ENSMUSG00000031536	Polb	0.0452046	0.996652	-2.20972	0.318876	-1.16385	0.646532	NO
mmu-miR-532-5p	ENSMUSG00000008892	Vdac3	-0.065959	0.996652	-0.0375693	0.883907	-2.41669	0.0677441	NO
mmu-miR-337-5p	ENSMUSG00000037656	Slc20a2	0.0123696	0.996652	-0.0408363	0.833174	-1.33065	0.709559	NO
mmu-miR-423-3p	ENSMUSG00000031534	Smim19	-0.0417084	0.996652	-0.606918	0.275113	-0.977902	0.338619	NO
mmu-miR-423-5p	ENSMUSG00000031534	Smim19	-0.0417084	0.996652	0.208863	0.685655	-1.52058	0.609909	NO
mmu-miR-34b-3p	ENSMUSG00000031533	Mrps31	-0.0703736	0.996652	-0.236776	0.643843	-2.05237	0.19094	NO
mmu-miR-369-5p	ENSMUSG00000031533	Mrps31	-0.0703736	0.996652	-0.0348029	0.908875	-0.633128	0.521823	NO
mmu-miR-423-3p	ENSMUSG00000031479	Vps36	-0.127081	0.996652	-0.606918	0.275113	-0.977902	0.338619	NO
mmu-miR-338-3p	ENSMUSG00000037725	Ckap2	-0.0354553	0.996652	0.807797	0.0377321	0.545226	0.240263	NO
mmu-miR-151-3p	ENSMUSG00000037725	Ckap2	-0.0354553	0.996652	0.150024	0.579751	-0.191302	0.306068	NO
mmu-miR-139-5p	ENSMUSG00000006567	Atp7b	0.124758	0.996652	-0.0705343	0.816628	-0.955541	0.548138	NO
mmu-miR-666-3p	ENSMUSG00000006567	Atp7b	0.124758	0.996652	-0.157681	0.726433	-3.3675	0.194747	NO
mmu-miR-188-5p	ENSMUSG00000017049	Ccdc70	NA	NA	-2.20972	0.318876	-1.16385	0.646532	NO
mmu-miR-409-5p	ENSMUSG00000017049	Ccdc70	NA	NA	1.24524	0.0614095	-1.5346	0.619529	NO
mmu-miR-151-5p	ENSMUSG00000017049	Ccdc70	NA	NA	-0.0473167	0.801413	0.0282668	0.900961	NO
mmu-miR-423-5p	ENSMUSG00000044222	Defb13	NA	NA	0.208863	0.685655	-1.52058	0.609909	NO
mmu-miR-151-3p	ENSMUSG00000044222	Defb13	NA	NA	0.150024	0.579751	-0.191302	0.306068	NO
mmu-miR-151-5p	ENSMUSG00000044222	Defb13	NA	NA	-0.0473167	0.801413	0.0282668	0.900961	NO
mmu-miR-369-3p	ENSMUSG00000058052	Defb35	0.936568	0.996652	0.217237	0.643052	0.479301	0.884751	NO
mmu-miR-338-3p	ENSMUSG00000064213	Defa24	NA	NA	0.807797	0.0377321	0.545226	0.240263	NO
mmu-miR-338-3p	ENSMUSG00000063206	Defa34	NA	NA	0.807797	0.0377321	0.545226	0.240263	NO
mmu-miR-666-3p	ENSMUSG00000063206	Defa34	NA	NA	-0.157681	0.726433	-3.3675	0.194747	NO
mmu-miR-338-3p	ENSMUSG00000060208	Defa17	NA	NA	0.807797	0.0377321	0.545226	0.240263	NO
mmu-miR-666-3p	ENSMUSG00000060208	Defa17	NA	NA	-0.157681	0.726433	-3.3675	0.194747	NO
mmu-miR-34b-3p	ENSMUSG00000074434	Defa28	NA	NA	-0.236776	0.643843	-2.05237	0.19094	NO
mmu-miR-338-3p	ENSMUSG00000074434	Defa28	NA	NA	0.807797	0.0377321	0.545226	0.240263	NO
mmu-miR-338-3p	ENSMUSG00000060070	Defa26	NA	NA	0.807797	0.0377321	0.545226	0.240263	NO
mmu-miR-338-3p	ENSMUSG00000065956	Defa37	NA	NA	0.807797	0.0377321	0.545226	0.240263	NO
mmu-miR-338-3p	ENSMUSG00000094818	Defa32	NA	NA	0.807797	0.0377321	0.545226	0.240263	NO
mmu-miR-338-3p	ENSMUSG00000094662	Defa36	NA	NA	0.807797	0.0377321	0.545226	0.240263	NO
mmu-miR-338-3p	ENSMUSG00000095066	Defa20	NA	NA	0.807797	0.0377321	0.545226	0.240263	NO
mmu-miR-34b-3p	ENSMUSG00000074436	Defa-ps18	NA	NA	-0.236776	0.643843	-2.05237	0.19094	NO
mmu-miR-338-3p	ENSMUSG00000074436	Defa-ps18	NA	NA	0.807797	0.0377321	0.545226	0.240263	NO
mmu-miR-338-3p	ENSMUSG00000074439	Defa5	NA	NA	0.807797	0.0377321	0.545226	0.240263	NO
mmu-miR-338-3p	ENSMUSG00000074440	Defa3	NA	NA	0.807797	0.0377321	0.545226	0.240263	NO
mmu-miR-666-3p	ENSMUSG00000074440	Defa3	NA	NA	-0.157681	0.726433	-3.3675	0.194747	NO
mmu-miR-338-3p	ENSMUSG00000074441	Defa40	NA	NA	0.807797	0.0377321	0.545226	0.240263	NO
mmu-miR-338-3p	ENSMUSG00000074443	Defa22	NA	NA	0.807797	0.0377321	0.545226	0.240263	NO
mmu-miR-338-3p	ENSMUSG00000074442	Defa31	NA	NA	0.807797	0.0377321	0.545226	0.240263	NO
mmu-miR-666-3p	ENSMUSG00000074442	Defa31	NA	NA	-0.157681	0.726433	-3.3675	0.194747	NO
mmu-miR-666-3p	ENSMUSG00000074444	Defa30	NA	NA	-0.157681	0.726433	-3.3675	0.194747	NO
mmu-miR-338-3p	ENSMUSG00000061845	Defa35	NA	NA	0.807797	0.0377321	0.545226	0.240263	NO
mmu-miR-338-3p	ENSMUSG00000074447	Defa21	NA	NA	0.807797	0.0377321	0.545226	0.240263	NO
mmu-miR-338-3p	ENSMUSG00000074446	Defa23	NA	NA	0.807797	0.0377321	0.545226	0.240263	NO
mmu-miR-666-3p	ENSMUSG00000074446	Defa23	NA	NA	-0.157681	0.726433	-3.3675	0.194747	NO
mmu-miR-574-3p	ENSMUSG00000071165	Gm6040	NA	NA	-1.00306	0.0201434	3.42572	0.263154	NO
mmu-miR-188-5p	ENSMUSG00000059230	Defb4	NA	NA	-2.20972	0.318876	-1.16385	0.646532	NO
mmu-miR-574-3p	ENSMUSG00000046354	Defb14	1.84945	0.996652	-1.00306	0.0201434	3.42572	0.263154	NO
mmu-miR-501-3p	ENSMUSG00000046354	Defb14	1.84945	0.996652	0.31491	0.302354	0.783282	0.221205	NO
mmu-miR-501-3p	ENSMUSG00000079842	Spag11a	NA	NA	0.31491	0.302354	0.783282	0.221205	NO
mmu-miR-338-3p	ENSMUSG00000059463	Spag11b	-1.64803	0.996652	0.807797	0.0377321	0.545226	0.240263	NO
mmu-miR-369-3p	ENSMUSG00000043787	Defb12	NA	NA	0.217237	0.643052	0.479301	0.884751	NO
mmu-miR-671-5p	ENSMUSG00000039814	Xkr5	1.07541	0.996652	-0.658749	0.352425	-1.92348	0.54595	NO
mmu-miR-34b-3p	ENSMUSG00000039842	Mcph1	0.0231629	0.996652	-0.236776	0.643843	-2.05237	0.19094	NO
mmu-miR-369-3p	ENSMUSG00000039842	Mcph1	0.0231629	0.996652	0.217237	0.643052	0.479301	0.884751	NO
mmu-miR-34b-3p	ENSMUSG00000031461	Myom2	-0.343383	0.996652	-0.236776	0.643843	-2.05237	0.19094	NO
mmu-miR-342-3p	ENSMUSG00000031461	Myom2	-0.343383	0.996652	-0.153595	0.696257	-1.76212	0.42733	NO
mmu-miR-337-5p	ENSMUSG00000049008	BB014433	0.595243	0.996652	-0.0408363	0.833174	-1.33065	0.709559	NO
mmu-miR-369-5p	ENSMUSG00000026317	Cln8	-0.177938	0.871459	-0.0348029	0.908875	-0.633128	0.521823	NO
mmu-miR-139-5p	ENSMUSG00000050052	Tdrp	-0.0359597	0.996652	-0.0705343	0.816628	-0.955541	0.548138	NO
mmu-miR-338-3p	ENSMUSG00000050052	Tdrp	-0.0359597	0.996652	0.807797	0.0377321	0.545226	0.240263	NO
mmu-miR-331-3p	ENSMUSG00000068631	Gm7676	NA	NA	-2.04862	0.000874315	-1.512	0.0611883	NO
mmu-miR-501-3p	ENSMUSG00000047710	Champ1	-0.156479	0.838507	0.31491	0.302354	0.783282	0.221205	NO
mmu-miR-337-5p	ENSMUSG00000047710	Champ1	-0.156479	0.838507	-0.0408363	0.833174	-1.33065	0.709559	NO
mmu-miR-342-3p	ENSMUSG00000031458	Coprs	0.0316038	0.996652	-0.153595	0.696257	-1.76212	0.42733	NO
mmu-miR-666-3p	ENSMUSG00000038398	Upf3a	-0.0452042	0.996652	-0.157681	0.726433	-3.3675	0.194747	NO
mmu-miR-331-3p	ENSMUSG00000038416	Cdc16	-0.0596349	0.996652	-2.04862	0.000874315	-1.512	0.0611883	NO
mmu-miR-666-3p	ENSMUSG00000038416	Cdc16	-0.0596349	0.996652	-0.157681	0.726433	-3.3675	0.194747	NO
mmu-miR-423-3p	ENSMUSG00000031451	Gas6	0.0532289	0.996652	-0.606918	0.275113	-0.977902	0.338619	NO
mmu-miR-369-3p	ENSMUSG00000031451	Gas6	0.0532289	0.996652	0.217237	0.643052	0.479301	0.884751	NO
mmu-miR-151-3p	ENSMUSG00000031451	Gas6	0.0532289	0.996652	0.150024	0.579751	-0.191302	0.306068	NO
mmu-miR-666-3p	ENSMUSG00000031451	Gas6	0.0532289	0.996652	-0.157681	0.726433	-3.3675	0.194747	NO
mmu-miR-671-3p	ENSMUSG00000031452	1700029H14Rik	0.906448	0.996652	-0.383537	0.273755	-1.14401	0.674049	NO
mmu-miR-296-5p	ENSMUSG00000031450	Grk1	0.955143	0.996652	-1.3928	0.000171955	-3.00266	0.0124473	NO
mmu-miR-673-5p	ENSMUSG00000031449	Atp4b	0.897778	0.996652	-0.264954	0.536775	-0.680037	0.0343531	NO
mmu-miR-574-3p	ENSMUSG00000038497	Tmco3	-0.0948623	0.996652	-1.00306	0.0201434	3.42572	0.263154	NO
mmu-miR-342-3p	ENSMUSG00000038497	Tmco3	-0.0948623	0.996652	-0.153595	0.696257	-1.76212	0.42733	NO
mmu-miR-139-3p	ENSMUSG00000031447	Lamp1	-0.050731	0.996652	-0.176213	0.806923	-0.797117	0.298897	NO
mmu-miR-574-3p	ENSMUSG00000031444	F10	1.5389	0.996652	-1.00306	0.0201434	3.42572	0.263154	NO
mmu-miR-666-3p	ENSMUSG00000031444	F10	1.5389	0.996652	-0.157681	0.726433	-3.3675	0.194747	NO
mmu-miR-574-3p	ENSMUSG00000031443	F7	0.824727	0.996652	-1.00306	0.0201434	3.42572	0.263154	NO
mmu-miR-139-3p	ENSMUSG00000031443	F7	0.824727	0.996652	-0.176213	0.806923	-0.797117	0.298897	NO
mmu-miR-666-3p	ENSMUSG00000031443	F7	0.824727	0.996652	-0.157681	0.726433	-3.3675	0.194747	NO
mmu-miR-34b-3p	ENSMUSG00000031441	Atp11a	0.0666927	0.996652	-0.236776	0.643843	-2.05237	0.19094	NO
mmu-miR-423-3p	ENSMUSG00000031441	Atp11a	0.0666927	0.996652	-0.606918	0.275113	-0.977902	0.338619	NO
mmu-miR-188-5p	ENSMUSG00000031511	Arhgef7	-0.0569346	0.996652	-2.20972	0.318876	-1.16385	0.646532	NO
mmu-miR-34b-3p	ENSMUSG00000031509	Spaca7b	3.15186	0.928884	-0.236776	0.643843	-2.05237	0.19094	NO
mmu-miR-139-5p	ENSMUSG00000031508	Ankrd10	0.00213718	0.99841	-0.0705343	0.816628	-0.955541	0.548138	NO
mmu-miR-337-5p	ENSMUSG00000045969	Ing1	-0.226813	0.868168	-0.0408363	0.833174	-1.33065	0.709559	NO
mmu-miR-423-5p	ENSMUSG00000031505	Naxd	-0.0460797	0.996652	0.208863	0.685655	-1.52058	0.609909	NO
mmu-miR-671-5p	ENSMUSG00000031505	Naxd	-0.0460797	0.996652	-0.658749	0.352425	-1.92348	0.54595	NO
mmu-miR-151-3p	ENSMUSG00000031504	Rab20	1.20105	0.933888	0.150024	0.579751	-0.191302	0.306068	NO
mmu-miR-342-3p	ENSMUSG00000031504	Rab20	1.20105	0.933888	-0.153595	0.696257	-1.76212	0.42733	NO
mmu-miR-666-3p	ENSMUSG00000031504	Rab20	1.20105	0.933888	-0.157681	0.726433	-3.3675	0.194747	NO
mmu-miR-338-3p	ENSMUSG00000031503	Col4a2	0.173285	0.996652	0.807797	0.0377321	0.545226	0.240263	NO
mmu-miR-369-5p	ENSMUSG00000031503	Col4a2	0.173285	0.996652	-0.0348029	0.908875	-0.633128	0.521823	NO
mmu-miR-342-3p	ENSMUSG00000038894	Irs2	-0.0206259	0.996652	-0.153595	0.696257	-1.76212	0.42733	NO
mmu-miR-409-5p	ENSMUSG00000109084	Gm44955	NA	NA	1.24524	0.0614095	-1.5346	0.619529	NO
mmu-miR-671-3p	ENSMUSG00000109084	Gm44955	NA	NA	-0.383537	0.273755	-1.14401	0.674049	NO
mmu-miR-574-3p	ENSMUSG00000031497	Tnfsf13b	0.133234	0.996652	-1.00306	0.0201434	3.42572	0.263154	NO
mmu-miR-574-3p	ENSMUSG00000040396	Abhd13	-0.0636462	0.996652	-1.00306	0.0201434	3.42572	0.263154	NO
mmu-miR-574-3p	ENSMUSG00000023073	Slc10a2	NA	NA	-1.00306	0.0201434	3.42572	0.263154	NO
mmu-miR-369-3p	ENSMUSG00000022322	Shcbp1	0.295078	0.996652	0.217237	0.643052	0.479301	0.884751	NO
mmu-miR-369-5p	ENSMUSG00000058748	Zfp958	-0.0663898	0.996652	-0.0348029	0.908875	-0.633128	0.521823	NO
mmu-miR-574-3p	ENSMUSG00000008206	Cers4	0.0457227	0.996652	-1.00306	0.0201434	3.42572	0.263154	NO
mmu-miR-574-3p	ENSMUSG00000023235	Ccl25	0.240243	0.809784	-1.00306	0.0201434	3.42572	0.263154	NO
mmu-miR-342-3p	ENSMUSG00000023235	Ccl25	0.240243	0.809784	-0.153595	0.696257	-1.76212	0.42733	NO
mmu-miR-369-5p	ENSMUSG00000023235	Ccl25	0.240243	0.809784	-0.0348029	0.908875	-0.633128	0.521823	NO
mmu-miR-331-3p	ENSMUSG00000023235	Ccl25	0.240243	0.809784	-2.04862	0.000874315	-1.512	0.0611883	NO
mmu-miR-139-3p	ENSMUSG00000002949	Timm44	0.0266665	0.996652	-0.176213	0.806923	-0.797117	0.298897	NO
mmu-miR-673-5p	ENSMUSG00000002949	Timm44	0.0266665	0.996652	-0.264954	0.536775	-0.680037	0.0343531	NO
mmu-miR-338-3p	ENSMUSG00000011837	Snapc2	-0.215928	0.996652	0.807797	0.0377321	0.545226	0.240263	NO
mmu-miR-331-3p	ENSMUSG00000002948	Map2k7	-0.113228	0.996652	-2.04862	0.000874315	-1.512	0.0611883	NO
mmu-miR-139-3p	ENSMUSG00000065987	Cd209b	-1.7225	0.996652	-0.176213	0.806923	-0.797117	0.298897	NO
mmu-miR-34b-3p	ENSMUSG00000031494	Cd209a	-0.562249	0.996652	-0.236776	0.643843	-2.05237	0.19094	NO
mmu-miR-574-3p	ENSMUSG00000013974	Mcemp1	0.246506	0.996652	-1.00306	0.0201434	3.42572	0.263154	NO
mmu-miR-532-5p	ENSMUSG00000013974	Mcemp1	0.246506	0.996652	-0.0375693	0.883907	-2.41669	0.0677441	NO
mmu-miR-574-3p	ENSMUSG00000012705	Retn	-0.40867	0.996652	-1.00306	0.0201434	3.42572	0.263154	NO
mmu-miR-673-5p	ENSMUSG00000044433	Camsap3	-0.0533497	0.996652	-0.264954	0.536775	-0.680037	0.0343531	NO
mmu-miR-671-3p	ENSMUSG00000044433	Camsap3	-0.0533497	0.996652	-0.383537	0.273755	-1.14401	0.674049	NO
mmu-miR-151-5p	ENSMUSG00000044433	Camsap3	-0.0533497	0.996652	-0.0473167	0.801413	0.0282668	0.900961	NO
mmu-miR-574-3p	ENSMUSG00000004565	Pnpla6	0.0510455	0.996652	-1.00306	0.0201434	3.42572	0.263154	NO
mmu-miR-409-5p	ENSMUSG00000004565	Pnpla6	0.0510455	0.996652	1.24524	0.0614095	-1.5346	0.619529	NO
mmu-miR-671-3p	ENSMUSG00000004567	Mcoln1	-0.0328375	0.996652	-0.383537	0.273755	-1.14401	0.674049	NO
mmu-miR-34b-3p	ENSMUSG00000047264	Zfp358	-0.0666495	0.996652	-0.236776	0.643843	-2.05237	0.19094	NO
mmu-miR-369-3p	ENSMUSG00000047264	Zfp358	-0.0666495	0.996652	0.217237	0.643052	0.479301	0.884751	NO
mmu-miR-296-5p	ENSMUSG00000040340	Saxo5	0.830898	0.996652	-1.3928	0.000171955	-3.00266	0.0124473	NO
mmu-miR-671-3p	ENSMUSG00000069633	Pex11g	0.00784291	0.99841	-0.383537	0.273755	-1.14401	0.674049	NO
mmu-miR-337-5p	ENSMUSG00000004568	Arhgef18	-0.0485504	0.996652	-0.0408363	0.833174	-1.33065	0.709559	NO
mmu-miR-188-5p	ENSMUSG00000004568	Arhgef18	-0.0485504	0.996652	-2.20972	0.318876	-1.16385	0.646532	NO
mmu-miR-423-3p	ENSMUSG00000005534	Insr	0.00229927	0.99841	-0.606918	0.275113	-0.977902	0.338619	NO
mmu-miR-409-5p	ENSMUSG00000059326	Csf2ra	0.156987	0.996652	1.24524	0.0614095	-1.5346	0.619529	NO
mmu-miR-34b-3p	ENSMUSG00000120514	Gm56644	NA	NA	-0.236776	0.643843	-2.05237	0.19094	NO
mmu-miR-139-5p	ENSMUSG00000003228	Grk5	0.00758617	0.99841	-0.0705343	0.816628	-0.955541	0.548138	NO
mmu-miR-331-3p	ENSMUSG00000003228	Grk5	0.00758617	0.99841	-2.04862	0.000874315	-1.512	0.0611883	NO
mmu-miR-139-5p	ENSMUSG00000063698	Sfxn4	0.0737622	0.996652	-0.0705343	0.816628	-0.955541	0.548138	NO
mmu-miR-34b-3p	ENSMUSG00000045052	Prlhr	-0.638662	0.996652	-0.236776	0.643843	-2.05237	0.19094	NO
mmu-miR-338-3p	ENSMUSG00000053117	E330013P04Rik	0.460272	0.729223	0.807797	0.0377321	0.545226	0.240263	NO
mmu-miR-337-5p	ENSMUSG00000040022	Rab11fip2	-0.0832065	0.996652	-0.0408363	0.833174	-1.33065	0.709559	NO
mmu-miR-34b-3p	ENSMUSG00000043969	Emx2	-0.0573094	0.996652	-0.236776	0.643843	-2.05237	0.19094	NO
mmu-miR-369-5p	ENSMUSG00000074746	Pdzd8	-0.0629236	0.996652	-0.0348029	0.908875	-0.633128	0.521823	NO
mmu-miR-409-5p	ENSMUSG00000040901	Kcnk18	-0.968245	0.996652	1.24524	0.0614095	-1.5346	0.619529	NO
mmu-miR-409-5p	ENSMUSG00000041362	Shtn1	-0.012513	0.996652	1.24524	0.0614095	-1.5346	0.619529	NO
mmu-miR-296-5p	ENSMUSG00000042179	Pnliprp1	0.936568	0.996652	-1.3928	0.000171955	-3.00266	0.0124473	NO
mmu-miR-34b-3p	ENSMUSG00000025090	Ccdc172	1.30999	0.996652	-0.236776	0.643843	-2.05237	0.19094	NO
mmu-miR-671-3p	ENSMUSG00000025090	Ccdc172	1.30999	0.996652	-0.383537	0.273755	-1.14401	0.674049	NO
mmu-miR-34b-3p	ENSMUSG00000025089	Gfra1	-0.00599874	0.998373	-0.236776	0.643843	-2.05237	0.19094	NO
mmu-miR-151-5p	ENSMUSG00000025089	Gfra1	-0.00599874	0.998373	-0.0473167	0.801413	0.0282668	0.900961	NO
mmu-miR-532-5p	ENSMUSG00000025086	Trub1	-0.110209	0.996652	-0.0375693	0.883907	-2.41669	0.0677441	NO
mmu-miR-409-5p	ENSMUSG00000025082	Vwa2	-0.133948	0.996652	1.24524	0.0614095	-1.5346	0.619529	NO
mmu-miR-151-5p	ENSMUSG00000025081	Tdrd1	-0.30367	0.996652	-0.0473167	0.801413	0.0282668	0.900961	NO
mmu-miR-574-3p	ENSMUSG00000035173	Ccdc186	-0.042021	0.996652	-1.00306	0.0201434	3.42572	0.263154	NO
mmu-miR-423-3p	ENSMUSG00000035283	Adrb1	-0.0937666	0.996652	-0.606918	0.275113	-0.977902	0.338619	NO
mmu-miR-34b-3p	ENSMUSG00000035818	Plekhs1	0.0686683	0.996652	-0.236776	0.643843	-2.05237	0.19094	NO
mmu-miR-337-5p	ENSMUSG00000025076	Casp7	0.176362	0.996652	-0.0408363	0.833174	-1.33065	0.709559	NO
mmu-miR-671-5p	ENSMUSG00000025075	Habp2	NA	NA	-0.658749	0.352425	-1.92348	0.54595	NO
mmu-miR-574-3p	ENSMUSG00000049134	Nrap	-1.14323	0.81296	-1.00306	0.0201434	3.42572	0.263154	NO
mmu-miR-532-5p	ENSMUSG00000049134	Nrap	-1.14323	0.81296	-0.0375693	0.883907	-2.41669	0.0677441	NO
mmu-miR-151-3p	ENSMUSG00000049134	Nrap	-1.14323	0.81296	0.150024	0.579751	-0.191302	0.306068	NO
mmu-miR-532-5p	ENSMUSG00000024982	Zdhhc6	-0.00928951	0.996652	-0.0375693	0.883907	-2.41669	0.0677441	NO
mmu-miR-139-5p	ENSMUSG00000055523	Gucy2g	-0.202365	0.996652	-0.0705343	0.816628	-0.955541	0.548138	NO
mmu-miR-532-5p	ENSMUSG00000024975	Pdcd4	-0.0531592	0.996652	-0.0375693	0.883907	-2.41669	0.0677441	NO
mmu-miR-337-5p	ENSMUSG00000071497	Nutf2-ps1	0.128392	0.996652	-0.0408363	0.833174	-1.33065	0.709559	NO
mmu-miR-409-5p	ENSMUSG00000071497	Nutf2-ps1	0.128392	0.996652	1.24524	0.0614095	-1.5346	0.619529	NO
mmu-miR-409-5p	ENSMUSG00000034765	Dusp5	-0.0303551	0.996652	1.24524	0.0614095	-1.5346	0.619529	NO
mmu-miR-369-5p	ENSMUSG00000025026	Add3	-0.0293314	0.996652	-0.0348029	0.908875	-0.633128	0.521823	NO
mmu-miR-188-5p	ENSMUSG00000062083	Rpl13a-ps1	0.588134	0.996652	-2.20972	0.318876	-1.16385	0.646532	NO
mmu-miR-188-5p	ENSMUSG00000046585	Cfap58	0.15302	0.996652	-2.20972	0.318876	-1.16385	0.646532	NO
mmu-miR-337-5p	ENSMUSG00000025068	Gsto1	-0.0754875	0.996652	-0.0408363	0.833174	-1.33065	0.709559	NO
mmu-miR-501-3p	ENSMUSG00000117975	Itprip	0.152089	0.996652	0.31491	0.302354	0.783282	0.221205	NO
mmu-miR-369-5p	ENSMUSG00000044948	Cfap43	0.575288	0.318476	-0.0348029	0.908875	-0.633128	0.521823	NO
mmu-miR-338-3p	ENSMUSG00000025064	Col17a1	0.377214	0.996652	0.807797	0.0377321	0.545226	0.240263	NO
mmu-miR-151-5p	ENSMUSG00000025064	Col17a1	0.377214	0.996652	-0.0473167	0.801413	0.0282668	0.900961	NO
mmu-miR-139-3p	ENSMUSG00000042694	Stn1	-0.0197933	0.996652	-0.176213	0.806923	-0.797117	0.298897	NO
mmu-miR-296-5p	ENSMUSG00000042694	Stn1	-0.0197933	0.996652	-1.3928	0.000171955	-3.00266	0.0124473	NO
mmu-miR-666-3p	ENSMUSG00000053617	Sh3pxd2a	-0.0400238	0.996652	-0.157681	0.726433	-3.3675	0.194747	NO
mmu-miR-369-5p	ENSMUSG00000033033	Calhm2	0.0430162	0.996652	-0.0348029	0.908875	-0.633128	0.521823	NO
mmu-miR-337-5p	ENSMUSG00000025047	Pdcd11	-0.031782	0.996652	-0.0408363	0.833174	-1.33065	0.709559	NO
mmu-miR-188-5p	ENSMUSG00000025047	Pdcd11	-0.031782	0.996652	-2.20972	0.318876	-1.16385	0.646532	NO
mmu-miR-532-5p	ENSMUSG00000025047	Pdcd11	-0.031782	0.996652	-0.0375693	0.883907	-2.41669	0.0677441	NO
mmu-miR-338-3p	ENSMUSG00000025047	Pdcd11	-0.031782	0.996652	0.807797	0.0377321	0.545226	0.240263	NO
mmu-miR-369-3p	ENSMUSG00000025047	Pdcd11	-0.031782	0.996652	0.217237	0.643052	0.479301	0.884751	NO
mmu-miR-666-3p	ENSMUSG00000025047	Pdcd11	-0.031782	0.996652	-0.157681	0.726433	-3.3675	0.194747	NO
mmu-miR-139-5p	ENSMUSG00000034336	Ina	-0.176903	0.782897	-0.0705343	0.816628	-0.955541	0.548138	NO
mmu-miR-338-3p	ENSMUSG00000034336	Ina	-0.176903	0.782897	0.807797	0.0377321	0.545226	0.240263	NO
mmu-miR-666-3p	ENSMUSG00000034336	Ina	-0.176903	0.782897	-0.157681	0.726433	-3.3675	0.194747	NO
mmu-miR-151-5p	ENSMUSG00000025041	Nt5c2	-0.0434709	0.996652	-0.0473167	0.801413	0.0282668	0.900961	NO
mmu-miR-296-5p	ENSMUSG00000062376	Borcs7	-0.0367803	0.996652	-1.3928	0.000171955	-3.00266	0.0124473	NO
mmu-miR-532-5p	ENSMUSG00000025034	Trim8	-0.125935	0.996652	-0.0375693	0.883907	-2.41669	0.0677441	NO
mmu-miR-673-5p	ENSMUSG00000025227	Mfsd13a	-0.0391718	0.996652	-0.264954	0.536775	-0.680037	0.0343531	NO
mmu-miR-666-3p	ENSMUSG00000025227	Mfsd13a	-0.0391718	0.996652	-0.157681	0.726433	-3.3675	0.194747	NO
mmu-miR-423-3p	ENSMUSG00000036748	Cuedc2	-0.12785	0.996652	-0.606918	0.275113	-0.977902	0.338619	NO
mmu-miR-671-5p	ENSMUSG00000036748	Cuedc2	-0.12785	0.996652	-0.658749	0.352425	-1.92348	0.54595	NO
mmu-miR-139-5p	ENSMUSG00000025226	Fbxl15	0.0115187	0.99841	-0.0705343	0.816628	-0.955541	0.548138	NO
mmu-miR-296-5p	ENSMUSG00000025226	Fbxl15	0.0115187	0.99841	-1.3928	0.000171955	-3.00266	0.0124473	NO
mmu-miR-296-5p	ENSMUSG00000037126	Psd	-0.166796	0.912091	-1.3928	0.000171955	-3.00266	0.0124473	NO
mmu-miR-296-5p	ENSMUSG00000025225	Nfkb2	0.185882	0.996652	-1.3928	0.000171955	-3.00266	0.0124473	NO
mmu-miR-188-5p	ENSMUSG00000025229	Pitx3	-0.489991	0.996652	-2.20972	0.318876	-1.16385	0.646532	NO
mmu-miR-331-3p	ENSMUSG00000025224	Gbf1	0.00917383	0.996652	-2.04862	0.000874315	-1.512	0.0611883	NO
mmu-miR-296-5p	ENSMUSG00000025224	Gbf1	0.00917383	0.996652	-1.3928	0.000171955	-3.00266	0.0124473	NO
mmu-miR-666-3p	ENSMUSG00000025224	Gbf1	0.00917383	0.996652	-0.157681	0.726433	-3.3675	0.194747	NO
mmu-miR-409-5p	ENSMUSG00000038754	Elovl3	4.05778	0.996652	1.24524	0.0614095	-1.5346	0.619529	NO
mmu-miR-188-5p	ENSMUSG00000055491	Pprc1	-0.028715	0.996652	-2.20972	0.318876	-1.16385	0.646532	NO
mmu-miR-409-5p	ENSMUSG00000055491	Pprc1	-0.028715	0.996652	1.24524	0.0614095	-1.5346	0.619529	NO
mmu-miR-532-5p	ENSMUSG00000025223	Ldb1	-0.117321	0.996652	-0.0375693	0.883907	-2.41669	0.0677441	NO
mmu-miR-151-5p	ENSMUSG00000025223	Ldb1	-0.117321	0.996652	-0.0473167	0.801413	0.0282668	0.900961	NO
mmu-miR-673-5p	ENSMUSG00000025223	Ldb1	-0.117321	0.996652	-0.264954	0.536775	-0.680037	0.0343531	NO
mmu-miR-342-3p	ENSMUSG00000074811	Hps6	-0.0638076	0.996652	-0.153595	0.696257	-1.76212	0.42733	NO
mmu-miR-666-3p	ENSMUSG00000025221	Kcnip2	0.108701	0.996652	-0.157681	0.726433	-3.3675	0.194747	NO
mmu-miR-139-5p	ENSMUSG00000056209	Npm3	-0.262096	0.996652	-0.0705343	0.816628	-0.955541	0.548138	NO
mmu-miR-409-5p	ENSMUSG00000056209	Npm3	-0.262096	0.996652	1.24524	0.0614095	-1.5346	0.619529	NO
mmu-miR-369-5p	ENSMUSG00000056209	Npm3	-0.262096	0.996652	-0.0348029	0.908875	-0.633128	0.521823	NO
mmu-miR-671-5p	ENSMUSG00000056209	Npm3	-0.262096	0.996652	-0.658749	0.352425	-1.92348	0.54595	NO
mmu-miR-296-5p	ENSMUSG00000025219	Fgf8	NA	NA	-1.3928	0.000171955	-3.00266	0.0124473	NO
mmu-miR-666-3p	ENSMUSG00000040913	Fbxw4	0.00891558	0.99841	-0.157681	0.726433	-3.3675	0.194747	NO
mmu-miR-671-3p	ENSMUSG00000041035	Dpcd	-0.0561972	0.996652	-0.383537	0.273755	-1.14401	0.674049	NO
mmu-miR-369-5p	ENSMUSG00000025217	Btrc	-0.0457935	0.996652	-0.0348029	0.908875	-0.633128	0.521823	NO
mmu-miR-673-5p	ENSMUSG00000025218	Poll	0.00581634	0.99841	-0.264954	0.536775	-0.680037	0.0343531	NO
mmu-miR-409-5p	ENSMUSG00000025218	Poll	0.00581634	0.99841	1.24524	0.0614095	-1.5346	0.619529	NO
mmu-miR-331-3p	ENSMUSG00000025216	Lbx1	NA	NA	-2.04862	0.000874315	-1.512	0.0611883	NO
mmu-miR-423-3p	ENSMUSG00000025213	Kazald1	-0.0903536	0.996652	-0.606918	0.275113	-0.977902	0.338619	NO
mmu-miR-409-5p	ENSMUSG00000025213	Kazald1	-0.0903536	0.996652	1.24524	0.0614095	-1.5346	0.619529	NO
mmu-miR-423-3p	ENSMUSG00000035342	Lzts2	-0.28878	0.677687	-0.606918	0.275113	-0.977902	0.338619	NO
mmu-miR-188-5p	ENSMUSG00000035342	Lzts2	-0.28878	0.677687	-2.20972	0.318876	-1.16385	0.646532	NO
mmu-miR-423-3p	ENSMUSG00000025209	Twnk	0.0397639	0.996652	-0.606918	0.275113	-0.977902	0.338619	NO
mmu-miR-188-5p	ENSMUSG00000025209	Twnk	0.0397639	0.996652	-2.20972	0.318876	-1.16385	0.646532	NO
mmu-miR-34b-3p	ENSMUSG00000036097	Slf2	-0.0108244	0.996652	-0.236776	0.643843	-2.05237	0.19094	NO
mmu-miR-423-3p	ENSMUSG00000004231	Pax2	-0.188798	0.996652	-0.606918	0.275113	-0.977902	0.338619	NO
mmu-miR-423-5p	ENSMUSG00000004231	Pax2	-0.188798	0.996652	0.208863	0.685655	-1.52058	0.609909	NO
mmu-miR-337-5p	ENSMUSG00000004231	Pax2	-0.188798	0.996652	-0.0408363	0.833174	-1.33065	0.709559	NO
mmu-miR-409-5p	ENSMUSG00000036450	Hif1an	0.0168618	0.996652	1.24524	0.0614095	-1.5346	0.619529	NO
mmu-miR-338-3p	ENSMUSG00000036961	Wnt8b	0.322892	0.996652	0.807797	0.0377321	0.545226	0.240263	NO
mmu-miR-671-5p	ENSMUSG00000036961	Wnt8b	0.322892	0.996652	-0.658749	0.352425	-1.92348	0.54595	NO
mmu-miR-139-3p	ENSMUSG00000051984	Sec31b	0.703576	0.996652	-0.176213	0.806923	-0.797117	0.298897	NO
mmu-miR-671-5p	ENSMUSG00000051984	Sec31b	0.703576	0.996652	-0.658749	0.352425	-1.92348	0.54595	NO
mmu-miR-296-5p	ENSMUSG00000037578	Pkd2l1	0.270222	0.996652	-1.3928	0.000171955	-3.00266	0.0124473	NO
mmu-miR-139-5p	ENSMUSG00000057506	Bloc1s2	-0.0702212	0.996652	-0.0705343	0.816628	-0.955541	0.548138	NO
mmu-miR-673-5p	ENSMUSG00000025200	Cwf19l1	-0.115423	0.996652	-0.264954	0.536775	-0.680037	0.0343531	NO
mmu-miR-188-5p	ENSMUSG00000025199	Chuk	0.167398	0.830741	-2.20972	0.318876	-1.16385	0.646532	NO
mmu-miR-151-3p	ENSMUSG00000025197	Cyp2c23	-1.03561	0.996652	0.150024	0.579751	-0.191302	0.306068	NO
mmu-miR-671-5p	ENSMUSG00000025195	Dnmbp	0.0269776	0.996652	-0.658749	0.352425	-1.92348	0.54595	NO
mmu-miR-574-3p	ENSMUSG00000025194	Abcc2	-0.224905	0.996652	-1.00306	0.0201434	3.42572	0.263154	NO
mmu-miR-671-3p	ENSMUSG00000025193	Cutc	-0.0735733	0.996652	-0.383537	0.273755	-1.14401	0.674049	NO
mmu-miR-671-3p	ENSMUSG00000040018	Cox15	-0.127268	0.996652	-0.383537	0.273755	-1.14401	0.674049	NO
mmu-miR-501-3p	ENSMUSG00000025192	Entpd7	-0.0766958	0.996652	0.31491	0.302354	0.783282	0.221205	NO
mmu-miR-139-3p	ENSMUSG00000040414	Slc25a28	-0.132247	0.996652	-0.176213	0.806923	-0.797117	0.298897	NO
mmu-miR-423-5p	ENSMUSG00000040414	Slc25a28	-0.132247	0.996652	0.208863	0.685655	-1.52058	0.609909	NO
mmu-miR-337-5p	ENSMUSG00000040414	Slc25a28	-0.132247	0.996652	-0.0408363	0.833174	-1.33065	0.709559	NO
mmu-miR-338-3p	ENSMUSG00000040414	Slc25a28	-0.132247	0.996652	0.807797	0.0377321	0.545226	0.240263	NO
mmu-miR-574-3p	ENSMUSG00000025190	Got1	-0.12172	0.996652	-1.00306	0.0201434	3.42572	0.263154	NO
mmu-miR-139-5p	ENSMUSG00000025190	Got1	-0.12172	0.996652	-0.0705343	0.816628	-0.955541	0.548138	NO
mmu-miR-671-3p	ENSMUSG00000025190	Got1	-0.12172	0.996652	-0.383537	0.273755	-1.14401	0.674049	NO
mmu-miR-671-3p	ENSMUSG00000044220	Nkx2-3	NA	NA	-0.383537	0.273755	-1.14401	0.674049	NO
mmu-miR-409-5p	ENSMUSG00000047509	Gm6776	0.42475	0.996652	1.24524	0.0614095	-1.5346	0.619529	NO
mmu-miR-188-5p	ENSMUSG00000074852	Hpse2	0.385588	0.996652	-2.20972	0.318876	-1.16385	0.646532	NO
mmu-miR-532-5p	ENSMUSG00000074852	Hpse2	0.385588	0.996652	-0.0375693	0.883907	-2.41669	0.0677441	NO
mmu-miR-337-5p	ENSMUSG00000025188	Hps1	0.164975	0.996652	-0.0408363	0.833174	-1.33065	0.709559	NO
mmu-miR-671-3p	ENSMUSG00000025188	Hps1	0.164975	0.996652	-0.383537	0.273755	-1.14401	0.674049	NO
mmu-miR-151-5p	ENSMUSG00000025188	Hps1	0.164975	0.996652	-0.0473167	0.801413	0.0282668	0.900961	NO
mmu-miR-666-3p	ENSMUSG00000025188	Hps1	0.164975	0.996652	-0.157681	0.726433	-3.3675	0.194747	NO
mmu-miR-369-5p	ENSMUSG00000060224	Pyroxd2	0.0307606	0.996652	-0.0348029	0.908875	-0.633128	0.521823	NO
mmu-miR-574-3p	ENSMUSG00000025184	R3hcc1l	-0.0851893	0.996652	-1.00306	0.0201434	3.42572	0.263154	NO
mmu-miR-369-5p	ENSMUSG00000042401	Crtac1	-0.0786294	0.996652	-0.0348029	0.908875	-0.633128	0.521823	NO
mmu-miR-139-3p	ENSMUSG00000018822	Sfrp5	1.03989	0.868168	-0.176213	0.806923	-0.797117	0.298897	NO
mmu-miR-139-5p	ENSMUSG00000018822	Sfrp5	1.03989	0.868168	-0.0705343	0.816628	-0.955541	0.548138	NO
mmu-miR-671-3p	ENSMUSG00000018822	Sfrp5	1.03989	0.868168	-0.383537	0.273755	-1.14401	0.674049	NO
mmu-miR-338-3p	ENSMUSG00000025172	Ankrd2	0.795443	0.996652	0.807797	0.0377321	0.545226	0.240263	NO
mmu-miR-151-3p	ENSMUSG00000025172	Ankrd2	0.795443	0.996652	0.150024	0.579751	-0.191302	0.306068	NO
mmu-miR-666-3p	ENSMUSG00000025172	Ankrd2	0.795443	0.996652	-0.157681	0.726433	-3.3675	0.194747	NO
mmu-miR-423-5p	ENSMUSG00000025171	Ubtd1	-0.0419782	0.996652	0.208863	0.685655	-1.52058	0.609909	NO
mmu-miR-671-3p	ENSMUSG00000025171	Ubtd1	-0.0419782	0.996652	-0.383537	0.273755	-1.14401	0.674049	NO
mmu-miR-296-5p	ENSMUSG00000025171	Ubtd1	-0.0419782	0.996652	-1.3928	0.000171955	-3.00266	0.0124473	NO
mmu-miR-423-3p	ENSMUSG00000025157	Zdhhc16	-0.0135821	0.996652	-0.606918	0.275113	-0.977902	0.338619	NO
mmu-miR-532-5p	ENSMUSG00000025157	Zdhhc16	-0.0135821	0.996652	-0.0375693	0.883907	-2.41669	0.0677441	NO
mmu-miR-673-5p	ENSMUSG00000025159	Mms19	0.0730967	0.996652	-0.264954	0.536775	-0.680037	0.0343531	NO
mmu-miR-338-3p	ENSMUSG00000025159	Mms19	0.0730967	0.996652	0.807797	0.0377321	0.545226	0.240263	NO
mmu-miR-671-3p	ENSMUSG00000025159	Mms19	0.0730967	0.996652	-0.383537	0.273755	-1.14401	0.674049	NO
mmu-miR-673-5p	ENSMUSG00000035049	Rrp12	-0.107919	0.996652	-0.264954	0.536775	-0.680037	0.0343531	NO
mmu-miR-331-3p	ENSMUSG00000035049	Rrp12	-0.107919	0.996652	-2.04862	0.000874315	-1.512	0.0611883	NO
mmu-miR-423-3p	ENSMUSG00000025020	Slit1	0.017289	0.996652	-0.606918	0.275113	-0.977902	0.338619	NO
mmu-miR-501-3p	ENSMUSG00000025019	Lcor	-0.0442348	0.996652	0.31491	0.302354	0.783282	0.221205	NO
mmu-miR-151-5p	ENSMUSG00000025019	Lcor	-0.0442348	0.996652	-0.0473167	0.801413	0.0282668	0.900961	NO
mmu-miR-151-5p	ENSMUSG00000044065	Gm9788	NA	NA	-0.0473167	0.801413	0.0282668	0.900961	NO
mmu-miR-409-5p	ENSMUSG00000025017	Pik3ap1	0.185891	0.996652	1.24524	0.0614095	-1.5346	0.619529	NO
mmu-miR-151-3p	ENSMUSG00000025017	Pik3ap1	0.185891	0.996652	0.150024	0.579751	-0.191302	0.306068	NO
mmu-miR-501-3p	ENSMUSG00000050121	Opalin	0.0475605	0.996652	0.31491	0.302354	0.783282	0.221205	NO
mmu-miR-338-3p	ENSMUSG00000025014	Dntt	-1.24491	0.996652	0.807797	0.0377321	0.545226	0.240263	NO
mmu-miR-369-5p	ENSMUSG00000061132	Blnk	0.184815	0.996652	-0.0348029	0.908875	-0.633128	0.521823	NO
mmu-miR-151-5p	ENSMUSG00000025008	Tctn3	-0.0367254	0.996652	-0.0473167	0.801413	0.0282668	0.900961	NO
mmu-miR-673-5p	ENSMUSG00000054827	Cyp2c50	NA	NA	-0.264954	0.536775	-0.680037	0.0343531	NO
mmu-miR-673-5p	ENSMUSG00000067225	Cyp2c54	NA	NA	-0.264954	0.536775	-0.680037	0.0343531	NO
mmu-miR-337-5p	ENSMUSG00000074882	Cyp2c68	NA	NA	-0.0408363	0.833174	-1.33065	0.709559	NO
mmu-miR-337-5p	ENSMUSG00000062624	Cyp2c67	NA	NA	-0.0408363	0.833174	-1.33065	0.709559	NO
mmu-miR-369-3p	ENSMUSG00000025003	Cyp2c39	NA	NA	0.217237	0.643052	0.479301	0.884751	NO
mmu-miR-673-5p	ENSMUSG00000003053	Cyp2c29	NA	NA	-0.264954	0.536775	-0.680037	0.0343531	NO
mmu-miR-151-3p	ENSMUSG00000025002	Cyp2c55	1.00536	0.996652	0.150024	0.579751	-0.191302	0.306068	NO
mmu-miR-139-3p	ENSMUSG00000025001	Hells	0.119239	0.996652	-0.176213	0.806923	-0.797117	0.298897	NO
mmu-miR-369-3p	ENSMUSG00000048720	Tbc1d12	-0.0173958	0.996652	0.217237	0.643052	0.479301	0.884751	NO
mmu-miR-671-3p	ENSMUSG00000048720	Tbc1d12	-0.0173958	0.996652	-0.383537	0.273755	-1.14401	0.674049	NO
mmu-miR-342-3p	ENSMUSG00000024999	Noc3l	-0.0634551	0.996652	-0.153595	0.696257	-1.76212	0.42733	NO
mmu-miR-337-5p	ENSMUSG00000054237	Fra10ac1	0.0454861	0.996652	-0.0408363	0.833174	-1.33065	0.709559	NO
mmu-miR-369-5p	ENSMUSG00000054237	Fra10ac1	0.0454861	0.996652	-0.0348029	0.908875	-0.633128	0.521823	NO
mmu-miR-337-5p	ENSMUSG00000024989	Cep55	-0.279821	0.996652	-0.0408363	0.833174	-1.33065	0.709559	NO
mmu-miR-666-3p	ENSMUSG00000024989	Cep55	-0.279821	0.996652	-0.157681	0.726433	-3.3675	0.194747	NO
mmu-miR-501-3p	ENSMUSG00000048612	Myof	0.199668	0.996652	0.31491	0.302354	0.783282	0.221205	NO
mmu-miR-34b-3p	ENSMUSG00000062432	Cyp26c1	0.878249	0.996652	-0.236776	0.643843	-2.05237	0.19094	NO
mmu-miR-139-3p	ENSMUSG00000024987	Cyp26a1	-0.213815	0.996652	-0.176213	0.806923	-0.797117	0.298897	NO
mmu-miR-369-3p	ENSMUSG00000024987	Cyp26a1	-0.213815	0.996652	0.217237	0.643052	0.479301	0.884751	NO
mmu-miR-139-5p	ENSMUSG00000053799	Exoc6	-0.069665	0.996652	-0.0705343	0.816628	-0.955541	0.548138	NO
mmu-miR-369-3p	ENSMUSG00000053799	Exoc6	-0.069665	0.996652	0.217237	0.643052	0.479301	0.884751	NO
mmu-miR-188-5p	ENSMUSG00000024986	Hhex	0.028624	0.996652	-2.20972	0.318876	-1.16385	0.646532	NO
mmu-miR-671-5p	ENSMUSG00000023307	Marchf5	-0.0609358	0.996652	-0.658749	0.352425	-1.92348	0.54595	NO
mmu-miR-331-3p	ENSMUSG00000047632	Fgfbp3	-0.174848	0.996652	-2.04862	0.000874315	-1.512	0.0611883	NO
mmu-miR-532-5p	ENSMUSG00000067279	Ppp1r3c	-0.17045	0.921838	-0.0375693	0.883907	-2.41669	0.0677441	NO
mmu-miR-342-3p	ENSMUSG00000067279	Ppp1r3c	-0.17045	0.921838	-0.153595	0.696257	-1.76212	0.42733	NO
mmu-miR-139-3p	ENSMUSG00000024805	Pcgf5	-0.164169	0.94072	-0.176213	0.806923	-0.797117	0.298897	NO
mmu-miR-151-5p	ENSMUSG00000024805	Pcgf5	-0.164169	0.94072	-0.0473167	0.801413	0.0282668	0.900961	NO
mmu-miR-369-5p	ENSMUSG00000024803	Ankrd1	0.067128	0.99841	-0.0348029	0.908875	-0.633128	0.521823	NO
mmu-miR-369-3p	ENSMUSG00000024800	Rpp30	-0.0205453	0.996652	0.217237	0.643052	0.479301	0.884751	NO
mmu-miR-151-3p	ENSMUSG00000024800	Rpp30	-0.0205453	0.996652	0.150024	0.579751	-0.191302	0.306068	NO
mmu-miR-188-5p	ENSMUSG00000024798	Htr7	-0.0821869	0.996652	-2.20972	0.318876	-1.16385	0.646532	NO
mmu-miR-34b-3p	ENSMUSG00000033610	Pank1	-0.041844	0.996652	-0.236776	0.643843	-2.05237	0.19094	NO
mmu-miR-139-5p	ENSMUSG00000034459	Ifit1	-0.137187	0.996652	-0.0705343	0.816628	-0.955541	0.548138	NO
mmu-miR-139-5p	ENSMUSG00000062488	Ifit3b	-0.304702	0.996652	-0.0705343	0.816628	-0.955541	0.548138	NO
mmu-miR-139-5p	ENSMUSG00000074896	Ifit3	-0.407557	0.84974	-0.0705343	0.816628	-0.955541	0.548138	NO
mmu-miR-338-3p	ENSMUSG00000024774	Ankrd22	-1.87104	0.996652	0.807797	0.0377321	0.545226	0.240263	NO
mmu-miR-139-3p	ENSMUSG00000024776	Stambpl1	-0.0207829	0.996652	-0.176213	0.806923	-0.797117	0.298897	NO
mmu-miR-501-3p	ENSMUSG00000056078	Lipm	-1.18215	0.996652	0.31491	0.302354	0.783282	0.221205	NO
mmu-miR-369-3p	ENSMUSG00000056078	Lipm	-1.18215	0.996652	0.217237	0.643052	0.479301	0.884751	NO
mmu-miR-666-3p	ENSMUSG00000024771	Lipk	-1.45141	0.996652	-0.157681	0.726433	-3.3675	0.194747	NO
mmu-miR-671-5p	ENSMUSG00000037603	Gm5519	0.510269	0.996652	-0.658749	0.352425	-1.92348	0.54595	NO
mmu-miR-369-3p	ENSMUSG00000071573	Rnls	-0.275191	0.996652	0.217237	0.643052	0.479301	0.884751	NO
mmu-miR-574-3p	ENSMUSG00000013662	Atad1	-0.104672	0.996652	-1.00306	0.0201434	3.42572	0.263154	NO
mmu-miR-671-5p	ENSMUSG00000024896	Minpp1	-0.0867459	0.996652	-0.658749	0.352425	-1.92348	0.54595	NO
mmu-miR-139-5p	ENSMUSG00000040451	Sgms1	0.0546216	0.996652	-0.0705343	0.816628	-0.955541	0.548138	NO
mmu-miR-369-3p	ENSMUSG00000040451	Sgms1	0.0546216	0.996652	0.217237	0.643052	0.479301	0.884751	NO
mmu-miR-532-5p	ENSMUSG00000053536	Cstf2t	-0.104789	0.996652	-0.0375693	0.883907	-2.41669	0.0677441	NO
mmu-miR-342-3p	ENSMUSG00000024868	Dkk1	3.08973	0.996652	-0.153595	0.696257	-1.76212	0.42733	NO
mmu-miR-337-5p	ENSMUSG00000024863	Mbl2	-1.95487	0.973359	-0.0408363	0.833174	-1.33065	0.709559	NO
mmu-miR-151-5p	ENSMUSG00000024863	Mbl2	-1.95487	0.973359	-0.0473167	0.801413	0.0282668	0.900961	NO
mmu-miR-338-3p	ENSMUSG00000024827	Gldc	-0.0653239	0.996652	0.807797	0.0377321	0.545226	0.240263	NO
mmu-miR-139-5p	ENSMUSG00000024817	Uhrf2	-0.0379011	0.996652	-0.0705343	0.816628	-0.955541	0.548138	NO
mmu-miR-369-3p	ENSMUSG00000038658	Ric1	0.0132522	0.996652	0.217237	0.643052	0.479301	0.884751	NO
mmu-miR-501-3p	ENSMUSG00000016495	Plgrkt	0.0184933	0.996652	0.31491	0.302354	0.783282	0.221205	NO
mmu-miR-369-3p	ENSMUSG00000016495	Plgrkt	0.0184933	0.996652	0.217237	0.643052	0.479301	0.884751	NO
mmu-miR-337-5p	ENSMUSG00000024789	Jak2	-0.101814	0.996652	-0.0408363	0.833174	-1.33065	0.709559	NO
mmu-miR-673-5p	ENSMUSG00000024785	Rcl1	-0.14265	0.996652	-0.264954	0.536775	-0.680037	0.0343531	NO
mmu-miR-151-3p	ENSMUSG00000024785	Rcl1	-0.14265	0.996652	0.150024	0.579751	-0.191302	0.306068	NO
mmu-miR-296-5p	ENSMUSG00000024785	Rcl1	-0.14265	0.996652	-1.3928	0.000171955	-3.00266	0.0124473	NO
mmu-miR-369-5p	ENSMUSG00000024782	Ak3	0.0190973	0.996652	-0.0348029	0.908875	-0.633128	0.521823	NO
mmu-miR-139-3p	ENSMUSG00000064202	Spata6l	0.131876	0.996652	-0.176213	0.806923	-0.797117	0.298897	NO
mmu-miR-532-5p	ENSMUSG00000064202	Spata6l	0.131876	0.996652	-0.0375693	0.883907	-2.41669	0.0677441	NO
mmu-miR-673-5p	ENSMUSG00000040929	Rfx3	0.0765215	0.996652	-0.264954	0.536775	-0.680037	0.0343531	NO
mmu-miR-501-3p	ENSMUSG00000040929	Rfx3	0.0765215	0.996652	0.31491	0.302354	0.783282	0.221205	NO
mmu-miR-501-3p	ENSMUSG00000041360	Pum3	-0.050921	0.996652	0.31491	0.302354	0.783282	0.221205	NO
mmu-miR-188-5p	ENSMUSG00000041360	Pum3	-0.050921	0.996652	-2.20972	0.318876	-1.16385	0.646532	NO
mmu-miR-151-3p	ENSMUSG00000024924	Vldlr	-0.0373804	0.996652	0.150024	0.579751	-0.191302	0.306068	NO
mmu-miR-409-5p	ENSMUSG00000074913	Gm815	NA	NA	1.24524	0.0614095	-1.5346	0.619529	NO
mmu-miR-337-5p	ENSMUSG00000024837	Dmrt1	3.33019	0.996652	-0.0408363	0.833174	-1.33065	0.709559	NO
mmu-miR-139-5p	ENSMUSG00000024878	Zng1	0.0556077	0.996652	-0.0705343	0.816628	-0.955541	0.548138	NO
mmu-miR-337-5p	ENSMUSG00000024878	Zng1	0.0556077	0.996652	-0.0408363	0.833174	-1.33065	0.709559	NO
mmu-miR-671-5p	ENSMUSG00000051490	Foxd4	NA	NA	-0.658749	0.352425	-1.92348	0.54595	NO
mmu-miR-139-5p	ENSMUSG00000048572	Tmem252	-0.111455	0.996652	-0.0705343	0.816628	-0.955541	0.548138	NO
mmu-miR-342-3p	ENSMUSG00000048572	Tmem252	-0.111455	0.996652	-0.153595	0.696257	-1.76212	0.42733	NO
mmu-miR-369-5p	ENSMUSG00000074922	Pabir1	0.0041458	0.99841	-0.0348029	0.908875	-0.633128	0.521823	NO
mmu-miR-369-5p	ENSMUSG00000024867	Pip5k1b	0.0576137	0.996652	-0.0348029	0.908875	-0.633128	0.521823	NO
mmu-miR-338-3p	ENSMUSG00000059363	Fxn	-0.139099	0.996652	0.807797	0.0377321	0.545226	0.240263	NO
mmu-miR-188-5p	ENSMUSG00000033207	Mamdc2	0.048944	0.996652	-2.20972	0.318876	-1.16385	0.646532	NO
mmu-miR-409-5p	ENSMUSG00000033207	Mamdc2	0.048944	0.996652	1.24524	0.0614095	-1.5346	0.619529	NO
mmu-miR-296-5p	ENSMUSG00000024943	Smc5	0.0380438	0.996652	-1.3928	0.000171955	-3.00266	0.0124473	NO
mmu-miR-671-3p	ENSMUSG00000052387	Trpm3	0.591344	0.798472	-0.383537	0.273755	-1.14401	0.674049	NO
mmu-miR-666-3p	ENSMUSG00000052387	Trpm3	0.591344	0.798472	-0.157681	0.726433	-3.3675	0.194747	NO
mmu-miR-188-5p	ENSMUSG00000047368	Abhd17b	-0.0909083	0.996652	-2.20972	0.318876	-1.16385	0.646532	NO
mmu-miR-423-5p	ENSMUSG00000053279	Aldh1a1	-0.193622	0.898538	0.208863	0.685655	-1.52058	0.609909	NO
mmu-miR-671-3p	ENSMUSG00000047168	Gm6684	0.84906	0.996652	-0.383537	0.273755	-1.14401	0.674049	NO
mmu-miR-337-5p	ENSMUSG00000036192	Rorb	-0.0930305	0.996652	-0.0408363	0.833174	-1.33065	0.709559	NO
mmu-miR-34b-3p	ENSMUSG00000024727	Trpm6	0.225181	0.996652	-0.236776	0.643843	-2.05237	0.19094	NO
mmu-miR-574-3p	ENSMUSG00000024725	Ostf1	0.158796	0.996652	-1.00306	0.0201434	3.42572	0.263154	NO
mmu-miR-139-5p	ENSMUSG00000024725	Ostf1	0.158796	0.996652	-0.0705343	0.816628	-0.955541	0.548138	NO
mmu-miR-574-3p	ENSMUSG00000024713	Pcsk5	-0.0864491	0.996652	-1.00306	0.0201434	3.42572	0.263154	NO
mmu-miR-338-3p	ENSMUSG00000024713	Pcsk5	-0.0864491	0.996652	0.807797	0.0377321	0.545226	0.240263	NO
mmu-miR-338-3p	ENSMUSG00000024712	Rfk	-0.124352	0.996652	0.807797	0.0377321	0.545226	0.240263	NO
mmu-miR-671-3p	ENSMUSG00000024712	Rfk	-0.124352	0.996652	-0.383537	0.273755	-1.14401	0.674049	NO
mmu-miR-532-5p	ENSMUSG00000046230	Vps13a	0.00774679	0.996652	-0.0375693	0.883907	-2.41669	0.0677441	NO
mmu-miR-423-3p	ENSMUSG00000024697	Gna14	0.231696	0.996652	-0.606918	0.275113	-0.977902	0.338619	NO
mmu-miR-139-3p	ENSMUSG00000063586	Gm5513	-0.0494212	0.998141	-0.176213	0.806923	-0.797117	0.298897	NO
mmu-miR-369-3p	ENSMUSG00000024642	Tle4	-0.125667	0.957229	0.217237	0.643052	0.479301	0.884751	NO
mmu-miR-331-3p	ENSMUSG00000059105	Or9i16	1.5389	0.996652	-2.04862	0.000874315	-1.512	0.0611883	NO
mmu-miR-369-3p	ENSMUSG00000044040	Or9q2	NA	NA	0.217237	0.643052	0.479301	0.884751	NO
mmu-miR-369-5p	ENSMUSG00000061387	Or10w1	NA	NA	-0.0348029	0.908875	-0.633128	0.521823	NO
mmu-miR-338-3p	ENSMUSG00000045678	Or5b124	NA	NA	0.807797	0.0377321	0.545226	0.240263	NO
mmu-miR-342-3p	ENSMUSG00000096289	Or5b122	NA	NA	-0.153595	0.696257	-1.76212	0.42733	NO
mmu-miR-501-3p	ENSMUSG00000057503	Or5b106	-0.493122	0.996652	0.31491	0.302354	0.783282	0.221205	NO
mmu-miR-532-5p	ENSMUSG00000046913	Or5b99	NA	NA	-0.0375693	0.883907	-2.41669	0.0677441	NO
mmu-miR-188-5p	ENSMUSG00000048456	Or5b12	NA	NA	-2.20972	0.318876	-1.16385	0.646532	NO
mmu-miR-369-3p	ENSMUSG00000046272	Or5b21	1.31918	0.996652	0.217237	0.643052	0.479301	0.884751	NO
mmu-miR-423-3p	ENSMUSG00000024694	Keg1	NA	NA	-0.606918	0.275113	-0.977902	0.338619	NO
mmu-miR-532-5p	ENSMUSG00000024694	Keg1	NA	NA	-0.0375693	0.883907	-2.41669	0.0677441	NO
mmu-miR-369-3p	ENSMUSG00000024694	Keg1	NA	NA	0.217237	0.643052	0.479301	0.884751	NO
mmu-miR-331-3p	ENSMUSG00000063683	Glyat	0.243565	0.996652	-2.04862	0.000874315	-1.512	0.0611883	NO
mmu-miR-532-5p	ENSMUSG00000039982	Dtx4	-0.0707095	0.996652	-0.0375693	0.883907	-2.41669	0.0677441	NO
mmu-miR-34b-3p	ENSMUSG00000067525	Or4z4	3.33019	0.996652	-0.236776	0.643843	-2.05237	0.19094	NO
mmu-miR-369-3p	ENSMUSG00000046139	Patl1	-0.0908024	0.996652	0.217237	0.643052	0.479301	0.884751	NO
mmu-miR-331-3p	ENSMUSG00000046139	Patl1	-0.0908024	0.996652	-2.04862	0.000874315	-1.512	0.0611883	NO
mmu-miR-338-3p	ENSMUSG00000051548	Gm6365	0.00280468	0.99976	0.807797	0.0377321	0.545226	0.240263	NO
mmu-miR-34b-3p	ENSMUSG00000067545	Or10q3	-1.44926	0.996652	-0.236776	0.643843	-2.05237	0.19094	NO
mmu-miR-409-5p	ENSMUSG00000060556	Or10v9	1.48251	0.996652	1.24524	0.0614095	-1.5346	0.619529	NO
mmu-miR-188-5p	ENSMUSG00000048292	Or10v5	-0.100576	0.996652	-2.20972	0.318876	-1.16385	0.646532	NO
mmu-miR-151-5p	ENSMUSG00000024682	Cblif	1.13824	0.996652	-0.0473167	0.801413	0.0282668	0.900961	NO
mmu-miR-337-5p	ENSMUSG00000041857	Oosp1	3.8011	0.996652	-0.0408363	0.833174	-1.33065	0.709559	NO
mmu-miR-342-3p	ENSMUSG00000024679	Ms4a6d	-0.685121	0.996652	-0.153595	0.696257	-1.76212	0.42733	NO
mmu-miR-369-5p	ENSMUSG00000024680	Ms4a2	2.79741	0.996652	-0.0348029	0.908875	-0.633128	0.521823	NO
mmu-miR-342-3p	ENSMUSG00000024678	Ms4a4d	0.324727	0.996652	-0.153595	0.696257	-1.76212	0.42733	NO
mmu-miR-338-3p	ENSMUSG00000024728	Ms4a19	1.31918	0.996652	0.807797	0.0377321	0.545226	0.240263	NO
mmu-miR-139-5p	ENSMUSG00000024732	Ccdc86	-0.0635674	0.996652	-0.0705343	0.816628	-0.955541	0.548138	NO
mmu-miR-666-3p	ENSMUSG00000024734	Zp1	-2.41093	0.996652	-0.157681	0.726433	-3.3675	0.194747	NO
mmu-miR-409-5p	ENSMUSG00000034117	Ptgdr2	-1.60878	0.996652	1.24524	0.0614095	-1.5346	0.619529	NO
mmu-miR-673-5p	ENSMUSG00000024735	Prpf19	-0.0940797	0.996652	-0.264954	0.536775	-0.680037	0.0343531	NO
mmu-miR-671-3p	ENSMUSG00000024735	Prpf19	-0.0940797	0.996652	-0.383537	0.273755	-1.14401	0.674049	NO
mmu-miR-423-5p	ENSMUSG00000034659	Tmem109	-0.0612329	0.996652	0.208863	0.685655	-1.52058	0.609909	NO
mmu-miR-369-5p	ENSMUSG00000024736	Tmem132a	-0.0558448	0.996652	-0.0348029	0.908875	-0.633128	0.521823	NO
mmu-miR-331-3p	ENSMUSG00000024736	Tmem132a	-0.0558448	0.996652	-2.04862	0.000874315	-1.512	0.0611883	NO
mmu-miR-423-5p	ENSMUSG00000067577	A430093F15Rik	0.754139	0.996652	0.208863	0.685655	-1.52058	0.609909	NO
mmu-miR-409-5p	ENSMUSG00000024670	Cd6	-0.168484	0.996652	1.24524	0.0614095	-1.5346	0.619529	NO
mmu-miR-369-5p	ENSMUSG00000043789	Vwce	0.0860575	0.996652	-0.0348029	0.908875	-0.633128	0.521823	NO
mmu-miR-423-5p	ENSMUSG00000024738	Pga5	0.601407	0.996652	0.208863	0.685655	-1.52058	0.609909	NO
mmu-miR-337-5p	ENSMUSG00000024738	Pga5	0.601407	0.996652	-0.0408363	0.833174	-1.33065	0.709559	NO
mmu-miR-188-5p	ENSMUSG00000024738	Pga5	0.601407	0.996652	-2.20972	0.318876	-1.16385	0.646532	NO
mmu-miR-532-5p	ENSMUSG00000024738	Pga5	0.601407	0.996652	-0.0375693	0.883907	-2.41669	0.0677441	NO
mmu-miR-673-5p	ENSMUSG00000024740	Ddb1	-0.047105	0.996652	-0.264954	0.536775	-0.680037	0.0343531	NO
mmu-miR-671-3p	ENSMUSG00000024740	Ddb1	-0.047105	0.996652	-0.383537	0.273755	-1.14401	0.674049	NO
mmu-miR-671-5p	ENSMUSG00000024667	Tmem216	-0.1597	0.996652	-0.658749	0.352425	-1.92348	0.54595	NO
mmu-miR-369-5p	ENSMUSG00000024667	Tmem216	-0.1597	0.996652	-0.0348029	0.908875	-0.633128	0.521823	NO
mmu-miR-532-5p	ENSMUSG00000024668	Sdhaf2	0.081916	0.996652	-0.0375693	0.883907	-2.41669	0.0677441	NO
mmu-miR-409-5p	ENSMUSG00000035179	Saxo4	0.268591	0.996652	1.24524	0.0614095	-1.5346	0.619529	NO
mmu-miR-671-5p	ENSMUSG00000035735	Dagla	-0.035002	0.996652	-0.658749	0.352425	-1.92348	0.54595	NO
mmu-miR-673-5p	ENSMUSG00000036372	Tmem258	-0.131533	0.996652	-0.264954	0.536775	-0.680037	0.0343531	NO
mmu-miR-409-5p	ENSMUSG00000036372	Tmem258	-0.131533	0.996652	1.24524	0.0614095	-1.5346	0.619529	NO
mmu-miR-139-5p	ENSMUSG00000024742	Fen1	-0.159049	0.996652	-0.0705343	0.816628	-0.955541	0.548138	NO
mmu-miR-501-3p	ENSMUSG00000024660	Incenp	-0.158847	0.996652	0.31491	0.302354	0.783282	0.221205	NO
mmu-miR-337-5p	ENSMUSG00000024660	Incenp	-0.158847	0.996652	-0.0408363	0.833174	-1.33065	0.709559	NO
mmu-miR-338-3p	ENSMUSG00000024660	Incenp	-0.158847	0.996652	0.807797	0.0377321	0.545226	0.240263	NO
mmu-miR-139-3p	ENSMUSG00000024653	Scgb1a1	NA	NA	-0.176213	0.806923	-0.797117	0.298897	NO
mmu-miR-423-5p	ENSMUSG00000024653	Scgb1a1	NA	NA	0.208863	0.685655	-1.52058	0.609909	NO
mmu-miR-671-5p	ENSMUSG00000024653	Scgb1a1	NA	NA	-0.658749	0.352425	-1.92348	0.54595	NO
mmu-miR-151-5p	ENSMUSG00000024653	Scgb1a1	NA	NA	-0.0473167	0.801413	0.0282668	0.900961	NO
mmu-miR-188-5p	ENSMUSG00000069833	Ahnak	-0.017623	0.996652	-2.20972	0.318876	-1.16385	0.646532	NO
mmu-miR-139-3p	ENSMUSG00000071644	Eef1g	-0.0797557	0.996652	-0.176213	0.806923	-0.797117	0.298897	NO
mmu-miR-337-5p	ENSMUSG00000071644	Eef1g	-0.0797557	0.996652	-0.0408363	0.833174	-1.33065	0.709559	NO
mmu-miR-188-5p	ENSMUSG00000071644	Eef1g	-0.0797557	0.996652	-2.20972	0.318876	-1.16385	0.646532	NO
mmu-miR-188-5p	ENSMUSG00000071646	Mta2	-0.0267635	0.996652	-2.20972	0.318876	-1.16385	0.646532	NO
mmu-miR-139-5p	ENSMUSG00000071647	Eml3	-0.072578	0.996652	-0.0705343	0.816628	-0.955541	0.548138	NO
mmu-miR-338-3p	ENSMUSG00000071647	Eml3	-0.072578	0.996652	0.807797	0.0377321	0.545226	0.240263	NO
mmu-miR-423-3p	ENSMUSG00000071649	B3gat3	-0.0720262	0.996652	-0.606918	0.275113	-0.977902	0.338619	NO
mmu-miR-673-5p	ENSMUSG00000071649	B3gat3	-0.0720262	0.996652	-0.264954	0.536775	-0.680037	0.0343531	NO
mmu-miR-409-5p	ENSMUSG00000071649	B3gat3	-0.0720262	0.996652	1.24524	0.0614095	-1.5346	0.619529	NO
mmu-miR-671-3p	ENSMUSG00000071649	B3gat3	-0.0720262	0.996652	-0.383537	0.273755	-1.14401	0.674049	NO
mmu-miR-501-3p	ENSMUSG00000071653	1810009A15Rik	-0.0705003	0.996652	0.31491	0.302354	0.783282	0.221205	NO
mmu-miR-139-3p	ENSMUSG00000071655	Ubxn1	-0.127083	0.996652	-0.176213	0.806923	-0.797117	0.298897	NO
mmu-miR-671-3p	ENSMUSG00000071654	Uqcc3	-0.26856	0.882873	-0.383537	0.273755	-1.14401	0.674049	NO
mmu-miR-338-3p	ENSMUSG00000071656	Lrrn4cl	-0.250102	0.996652	0.807797	0.0377321	0.545226	0.240263	NO
mmu-miR-671-3p	ENSMUSG00000071656	Lrrn4cl	-0.250102	0.996652	-0.383537	0.273755	-1.14401	0.674049	NO
mmu-miR-369-3p	ENSMUSG00000071660	Ttc9c	-0.0611966	0.996652	0.217237	0.643052	0.479301	0.884751	NO
mmu-miR-151-5p	ENSMUSG00000071662	Polr2g	-0.0924754	0.996652	-0.0473167	0.801413	0.0282668	0.900961	NO
mmu-miR-423-5p	ENSMUSG00000003680	Taf6l	0.0829563	0.996652	0.208863	0.685655	-1.52058	0.609909	NO
mmu-miR-409-5p	ENSMUSG00000003680	Taf6l	0.0829563	0.996652	1.24524	0.0614095	-1.5346	0.619529	NO
mmu-miR-139-3p	ENSMUSG00000010097	Nxf1	-0.0023248	0.99841	-0.176213	0.806923	-0.797117	0.298897	NO
mmu-miR-139-3p	ENSMUSG00000010110	Stx5a	0.0592238	0.996652	-0.176213	0.806923	-0.797117	0.298897	NO
mmu-miR-666-3p	ENSMUSG00000010110	Stx5a	0.0592238	0.996652	-0.157681	0.726433	-3.3675	0.194747	NO
mmu-miR-296-5p	ENSMUSG00000010110	Stx5a	0.0592238	0.996652	-1.3928	0.000171955	-3.00266	0.0124473	NO
mmu-miR-188-5p	ENSMUSG00000042729	Wdr74	-0.0113061	0.996652	-2.20972	0.318876	-1.16385	0.646532	NO
mmu-miR-671-3p	ENSMUSG00000032773	Chrm1	-0.0908244	0.996652	-0.383537	0.273755	-1.14401	0.674049	NO
mmu-miR-338-3p	ENSMUSG00000024761	Gm16437	0.304844	0.996652	0.807797	0.0377321	0.545226	0.240263	NO
mmu-miR-423-5p	ENSMUSG00000024973	Plaat5	0.460285	0.996652	0.208863	0.685655	-1.52058	0.609909	NO
mmu-miR-151-5p	ENSMUSG00000024973	Plaat5	0.460285	0.996652	-0.0473167	0.801413	0.0282668	0.900961	NO
mmu-miR-423-3p	ENSMUSG00000024759	Atl3	-0.00505854	0.99841	-0.606918	0.275113	-0.977902	0.338619	NO
mmu-miR-188-5p	ENSMUSG00000024759	Atl3	-0.00505854	0.99841	-2.20972	0.318876	-1.16385	0.646532	NO
mmu-miR-666-3p	ENSMUSG00000024759	Atl3	-0.00505854	0.99841	-0.157681	0.726433	-3.3675	0.194747	NO
mmu-miR-671-5p	ENSMUSG00000024969	Mark2	-0.0897745	0.996652	-0.658749	0.352425	-1.92348	0.54595	NO
mmu-miR-296-5p	ENSMUSG00000035885	Cox8a	0.045567	0.996652	-1.3928	0.000171955	-3.00266	0.0124473	NO
mmu-miR-673-5p	ENSMUSG00000024767	Otub1	-0.138934	0.989841	-0.264954	0.536775	-0.680037	0.0343531	NO
mmu-miR-671-5p	ENSMUSG00000024767	Otub1	-0.138934	0.989841	-0.658749	0.352425	-1.92348	0.54595	NO
mmu-miR-151-5p	ENSMUSG00000024767	Otub1	-0.138934	0.989841	-0.0473167	0.801413	0.0282668	0.900961	NO
mmu-miR-296-5p	ENSMUSG00000036278	Macrod1	-0.112685	0.996652	-1.3928	0.000171955	-3.00266	0.0124473	NO
mmu-miR-188-5p	ENSMUSG00000024965	Fermt3	0.00669986	0.99841	-2.20972	0.318876	-1.16385	0.646532	NO
mmu-miR-296-5p	ENSMUSG00000047656	Trpt1	-0.077494	0.996652	-1.3928	0.000171955	-3.00266	0.0124473	NO
mmu-miR-574-3p	ENSMUSG00000037349	Nudt22	0.131628	0.996652	-1.00306	0.0201434	3.42572	0.263154	NO
mmu-miR-139-3p	ENSMUSG00000037349	Nudt22	0.131628	0.996652	-0.176213	0.806923	-0.797117	0.298897	NO
mmu-miR-338-3p	ENSMUSG00000037349	Nudt22	0.131628	0.996652	0.807797	0.0377321	0.545226	0.240263	NO
mmu-miR-296-5p	ENSMUSG00000037349	Nudt22	0.131628	0.996652	-1.3928	0.000171955	-3.00266	0.0124473	NO
mmu-miR-151-3p	ENSMUSG00000024962	Vegfb	-0.128122	0.996652	0.150024	0.579751	-0.191302	0.306068	NO
mmu-miR-139-5p	ENSMUSG00000056629	Fkbp2	0.0227773	0.996652	-0.0705343	0.816628	-0.955541	0.548138	NO
mmu-miR-666-3p	ENSMUSG00000056612	Ppp1r14b	-0.0646127	0.996652	-0.157681	0.726433	-3.3675	0.194747	NO
mmu-miR-331-3p	ENSMUSG00000024960	Plcb3	-0.00064485	0.999652	-2.04862	0.000874315	-1.512	0.0611883	NO
mmu-miR-501-3p	ENSMUSG00000024959	Bad	-0.0754338	0.996652	0.31491	0.302354	0.783282	0.221205	NO
mmu-miR-342-3p	ENSMUSG00000024959	Bad	-0.0754338	0.996652	-0.153595	0.696257	-1.76212	0.42733	NO
mmu-miR-151-5p	ENSMUSG00000024958	Gpr137	-0.0124064	0.996652	-0.0473167	0.801413	0.0282668	0.900961	NO
mmu-miR-423-5p	ENSMUSG00000050623	Catsperz	-0.536384	0.996652	0.208863	0.685655	-1.52058	0.609909	NO
mmu-miR-671-3p	ENSMUSG00000024957	Kcnk4	-0.252298	0.996652	-0.383537	0.273755	-1.14401	0.674049	NO
mmu-miR-671-5p	ENSMUSG00000024957	Kcnk4	-0.252298	0.996652	-0.658749	0.352425	-1.92348	0.54595	NO
mmu-miR-188-5p	ENSMUSG00000024955	Esrra	-0.0514505	0.996652	-2.20972	0.318876	-1.16385	0.646532	NO
mmu-miR-337-5p	ENSMUSG00000033768	Nrxn2	-0.14259	0.930778	-0.0408363	0.833174	-1.33065	0.709559	NO
mmu-miR-188-5p	ENSMUSG00000033768	Nrxn2	-0.14259	0.930778	-2.20972	0.318876	-1.16385	0.646532	NO
mmu-miR-673-5p	ENSMUSG00000032946	Rasgrp2	-0.0116889	0.997429	-0.264954	0.536775	-0.680037	0.0343531	NO
mmu-miR-331-3p	ENSMUSG00000032946	Rasgrp2	-0.0116889	0.997429	-2.04862	0.000874315	-1.512	0.0611883	NO
mmu-miR-673-5p	ENSMUSG00000024948	Map4k2	0.0557299	0.996652	-0.264954	0.536775	-0.680037	0.0343531	NO
mmu-miR-671-5p	ENSMUSG00000024769	Cdc42bpg	-0.0583559	0.996652	-0.658749	0.352425	-1.92348	0.54595	NO
mmu-miR-423-3p	ENSMUSG00000024772	Ehd1	0.0259459	0.996652	-0.606918	0.275113	-0.977902	0.338619	NO
mmu-miR-574-3p	ENSMUSG00000024773	Atg2a	-0.129807	0.996652	-1.00306	0.0201434	3.42572	0.263154	NO
mmu-miR-501-3p	ENSMUSG00000024773	Atg2a	-0.129807	0.996652	0.31491	0.302354	0.783282	0.221205	NO
mmu-miR-423-5p	ENSMUSG00000024777	Ppp2r5b	-0.21547	0.627679	0.208863	0.685655	-1.52058	0.609909	NO
mmu-miR-331-3p	ENSMUSG00000024777	Ppp2r5b	-0.21547	0.627679	-2.04862	0.000874315	-1.512	0.0611883	NO
mmu-miR-151-3p	ENSMUSG00000024777	Ppp2r5b	-0.21547	0.627679	0.150024	0.579751	-0.191302	0.306068	NO
mmu-miR-151-3p	ENSMUSG00000024786	Majin	-0.104083	0.996652	0.150024	0.579751	-0.191302	0.306068	NO
mmu-miR-296-5p	ENSMUSG00000024784	Gpha2	-0.0670212	0.996652	-1.3928	0.000171955	-3.00266	0.0124473	NO
mmu-miR-671-3p	ENSMUSG00000039699	Batf2	-3.73163	0.996652	-0.383537	0.273755	-1.14401	0.674049	NO
mmu-miR-342-3p	ENSMUSG00000039699	Batf2	-3.73163	0.996652	-0.153595	0.696257	-1.76212	0.42733	NO
mmu-miR-671-5p	ENSMUSG00000039699	Batf2	-3.73163	0.996652	-0.658749	0.352425	-1.92348	0.54595	NO
mmu-miR-188-5p	ENSMUSG00000024944	Arl2	-0.149787	0.996652	-2.20972	0.318876	-1.16385	0.646532	NO
mmu-miR-666-3p	ENSMUSG00000024944	Arl2	-0.149787	0.996652	-0.157681	0.726433	-3.3675	0.194747	NO
mmu-miR-331-3p	ENSMUSG00000024787	Snx15	-0.0352326	0.996652	-2.04862	0.000874315	-1.512	0.0611883	NO
mmu-miR-342-3p	ENSMUSG00000024787	Snx15	-0.0352326	0.996652	-0.153595	0.696257	-1.76212	0.42733	NO
mmu-miR-331-3p	ENSMUSG00000054999	Naaladl1	-0.0946127	0.996652	-2.04862	0.000874315	-1.512	0.0611883	NO
mmu-miR-671-3p	ENSMUSG00000024791	Cdca5	0.559747	0.996652	-0.383537	0.273755	-1.14401	0.674049	NO
mmu-miR-369-5p	ENSMUSG00000024792	Zfpl1	0.0232219	0.996652	-0.0348029	0.908875	-0.633128	0.521823	NO
mmu-miR-532-5p	ENSMUSG00000024797	Vps51	-0.0940221	0.996652	-0.0375693	0.883907	-2.41669	0.0677441	NO
mmu-miR-139-5p	ENSMUSG00000038274	Fau	-0.161081	0.99297	-0.0705343	0.816628	-0.955541	0.548138	NO
mmu-miR-666-3p	ENSMUSG00000024807	Syvn1	0.0129853	0.996652	-0.157681	0.726433	-3.3675	0.194747	NO
mmu-miR-423-5p	ENSMUSG00000024833	Pola2	0.128246	0.996652	0.208863	0.685655	-1.52058	0.609909	NO
mmu-miR-139-5p	ENSMUSG00000024833	Pola2	0.128246	0.996652	-0.0705343	0.816628	-0.955541	0.548138	NO
mmu-miR-409-5p	ENSMUSG00000024833	Pola2	0.128246	0.996652	1.24524	0.0614095	-1.5346	0.619529	NO
mmu-miR-671-5p	ENSMUSG00000024833	Pola2	0.128246	0.996652	-0.658749	0.352425	-1.92348	0.54595	NO
mmu-miR-423-3p	ENSMUSG00000037451	Slc22a20	NA	NA	-0.606918	0.275113	-0.977902	0.338619	NO
mmu-miR-501-3p	ENSMUSG00000037451	Slc22a20	NA	NA	0.31491	0.302354	0.783282	0.221205	NO
mmu-miR-331-3p	ENSMUSG00000024826	Dpf2	-0.00173158	0.998672	-2.04862	0.000874315	-1.512	0.0611883	NO
mmu-miR-296-5p	ENSMUSG00000024826	Dpf2	-0.00173158	0.998672	-1.3928	0.000171955	-3.00266	0.0124473	NO
mmu-miR-139-3p	ENSMUSG00000044390	Tigd3	-0.153996	0.996652	-0.176213	0.806923	-0.797117	0.298897	NO
mmu-miR-151-3p	ENSMUSG00000044390	Tigd3	-0.153996	0.996652	0.150024	0.579751	-0.191302	0.306068	NO
mmu-miR-151-5p	ENSMUSG00000044390	Tigd3	-0.153996	0.996652	-0.0473167	0.801413	0.0282668	0.900961	NO
mmu-miR-671-5p	ENSMUSG00000024818	Slc25a45	0.060385	0.996652	-0.658749	0.352425	-1.92348	0.54595	NO
mmu-miR-671-3p	ENSMUSG00000024816	Frmd8	-0.0345725	0.996652	-0.383537	0.273755	-1.14401	0.674049	NO
mmu-miR-671-5p	ENSMUSG00000024941	Scyl1	-0.138119	0.996652	-0.658749	0.352425	-1.92348	0.54595	NO
mmu-miR-139-5p	ENSMUSG00000024939	Fam89b	-0.475555	0.996652	-0.0705343	0.816628	-0.955541	0.548138	NO
mmu-miR-151-3p	ENSMUSG00000024939	Fam89b	-0.475555	0.996652	0.150024	0.579751	-0.191302	0.306068	NO
mmu-miR-671-3p	ENSMUSG00000079478	Znrd2	0.153853	0.996652	-0.383537	0.273755	-1.14401	0.674049	NO
mmu-miR-671-5p	ENSMUSG00000079478	Znrd2	0.153853	0.996652	-0.658749	0.352425	-1.92348	0.54595	NO
mmu-miR-673-5p	ENSMUSG00000024937	Ehbp1l1	0.0639483	0.996652	-0.264954	0.536775	-0.680037	0.0343531	NO
mmu-miR-139-3p	ENSMUSG00000024937	Ehbp1l1	0.0639483	0.996652	-0.176213	0.806923	-0.797117	0.298897	NO
mmu-miR-188-5p	ENSMUSG00000024937	Ehbp1l1	0.0639483	0.996652	-2.20972	0.318876	-1.16385	0.646532	NO
mmu-miR-409-5p	ENSMUSG00000024937	Ehbp1l1	0.0639483	0.996652	1.24524	0.0614095	-1.5346	0.619529	NO
mmu-miR-139-3p	ENSMUSG00000004054	Map3k11	0.0122345	0.996652	-0.176213	0.806923	-0.797117	0.298897	NO
mmu-miR-139-5p	ENSMUSG00000004054	Map3k11	0.0122345	0.996652	-0.0705343	0.816628	-0.955541	0.548138	NO
mmu-miR-331-3p	ENSMUSG00000004054	Map3k11	0.0122345	0.996652	-2.04862	0.000874315	-1.512	0.0611883	NO
mmu-miR-671-3p	ENSMUSG00000004054	Map3k11	0.0122345	0.996652	-0.383537	0.273755	-1.14401	0.674049	NO
mmu-miR-296-5p	ENSMUSG00000004054	Map3k11	0.0122345	0.996652	-1.3928	0.000171955	-3.00266	0.0124473	NO
mmu-miR-296-5p	ENSMUSG00000054874	Pcnx3	-0.011944	0.996652	-1.3928	0.000171955	-3.00266	0.0124473	NO
mmu-miR-501-3p	ENSMUSG00000024927	Rela	-0.186478	0.996652	0.31491	0.302354	0.783282	0.221205	NO
mmu-miR-409-5p	ENSMUSG00000024927	Rela	-0.186478	0.996652	1.24524	0.0614095	-1.5346	0.619529	NO
mmu-miR-671-3p	ENSMUSG00000024927	Rela	-0.186478	0.996652	-0.383537	0.273755	-1.14401	0.674049	NO
mmu-miR-139-5p	ENSMUSG00000049562	Ap5b1	-0.0340173	0.996652	-0.0705343	0.816628	-0.955541	0.548138	NO
mmu-miR-151-5p	ENSMUSG00000049562	Ap5b1	-0.0340173	0.996652	-0.0473167	0.801413	0.0282668	0.900961	NO
mmu-miR-139-3p	ENSMUSG00000056185	Snx32	-0.0511707	0.996652	-0.176213	0.806923	-0.797117	0.298897	NO
mmu-miR-423-5p	ENSMUSG00000056185	Snx32	-0.0511707	0.996652	0.208863	0.685655	-1.52058	0.609909	NO
mmu-miR-296-5p	ENSMUSG00000056185	Snx32	-0.0511707	0.996652	-1.3928	0.000171955	-3.00266	0.0124473	NO
mmu-miR-331-3p	ENSMUSG00000024909	Efemp2	0.0254474	0.996652	-2.04862	0.000874315	-1.512	0.0611883	NO
mmu-miR-296-5p	ENSMUSG00000024909	Efemp2	0.0254474	0.996652	-1.3928	0.000171955	-3.00266	0.0124473	NO
mmu-miR-139-3p	ENSMUSG00000024910	Ctsw	0.365348	0.996652	-0.176213	0.806923	-0.797117	0.298897	NO
mmu-miR-423-5p	ENSMUSG00000024910	Ctsw	0.365348	0.996652	0.208863	0.685655	-1.52058	0.609909	NO
mmu-miR-139-5p	ENSMUSG00000024910	Ctsw	0.365348	0.996652	-0.0705343	0.816628	-0.955541	0.548138	NO
mmu-miR-369-5p	ENSMUSG00000024910	Ctsw	0.365348	0.996652	-0.0348029	0.908875	-0.633128	0.521823	NO
mmu-miR-671-5p	ENSMUSG00000024910	Ctsw	0.365348	0.996652	-0.658749	0.352425	-1.92348	0.54595	NO
mmu-miR-331-3p	ENSMUSG00000024912	Fosl1	-0.979509	0.996652	-2.04862	0.000874315	-1.512	0.0611883	NO
mmu-miR-423-5p	ENSMUSG00000024914	Drap1	-0.137536	0.996652	0.208863	0.685655	-1.52058	0.609909	NO
mmu-miR-574-3p	ENSMUSG00000047423	AI837181	-0.164098	0.996652	-1.00306	0.0201434	3.42572	0.263154	NO
mmu-miR-501-3p	ENSMUSG00000047423	AI837181	-0.164098	0.996652	0.31491	0.302354	0.783282	0.221205	NO
mmu-miR-671-5p	ENSMUSG00000047423	AI837181	-0.164098	0.996652	-0.658749	0.352425	-1.92348	0.54595	NO
mmu-miR-296-5p	ENSMUSG00000047423	AI837181	-0.164098	0.996652	-1.3928	0.000171955	-3.00266	0.0124473	NO
mmu-miR-342-3p	ENSMUSG00000039330	Tsga10ip	0.55256	0.996652	-0.153595	0.696257	-1.76212	0.42733	NO
mmu-miR-574-3p	ENSMUSG00000024841	Eif1ad	-0.132288	0.996652	-1.00306	0.0201434	3.42572	0.263154	NO
mmu-miR-342-3p	ENSMUSG00000024846	Cst6	-0.7247	0.882873	-0.153595	0.696257	-1.76212	0.42733	NO
mmu-miR-532-5p	ENSMUSG00000047658	Gal3st3	-0.137605	0.996652	-0.0375693	0.883907	-2.41669	0.0677441	NO
mmu-miR-139-5p	ENSMUSG00000024853	Sf3b2	-0.033746	0.996652	-0.0705343	0.816628	-0.955541	0.548138	NO
mmu-miR-409-5p	ENSMUSG00000024855	Pacs1	-0.175966	0.608398	1.24524	0.0614095	-1.5346	0.619529	NO
mmu-miR-296-5p	ENSMUSG00000024855	Pacs1	-0.175966	0.608398	-1.3928	0.000171955	-3.00266	0.0124473	NO
mmu-miR-423-5p	ENSMUSG00000024862	Klc2	-0.188149	0.8062	0.208863	0.685655	-1.52058	0.609909	NO
mmu-miR-532-5p	ENSMUSG00000024875	Yif1a	0.0742997	0.996652	-0.0375693	0.883907	-2.41669	0.0677441	NO
mmu-miR-338-3p	ENSMUSG00000024875	Yif1a	0.0742997	0.996652	0.807797	0.0377321	0.545226	0.240263	NO
mmu-miR-331-3p	ENSMUSG00000024875	Yif1a	0.0742997	0.996652	-2.04862	0.000874315	-1.512	0.0611883	NO
mmu-miR-188-5p	ENSMUSG00000024873	Cnih2	-0.0483203	0.996652	-2.20972	0.318876	-1.16385	0.646532	NO
mmu-miR-671-3p	ENSMUSG00000024873	Cnih2	-0.0483203	0.996652	-0.383537	0.273755	-1.14401	0.674049	NO
mmu-miR-673-5p	ENSMUSG00000056481	Cd248	-0.286079	0.996652	-0.264954	0.536775	-0.680037	0.0343531	NO
mmu-miR-188-5p	ENSMUSG00000056481	Cd248	-0.286079	0.996652	-2.20972	0.318876	-1.16385	0.646532	NO
mmu-miR-338-3p	ENSMUSG00000056481	Cd248	-0.286079	0.996652	0.807797	0.0377321	0.545226	0.240263	NO
mmu-miR-337-5p	ENSMUSG00000047379	B4gat1	-0.103517	0.996652	-0.0408363	0.833174	-1.33065	0.709559	NO
mmu-miR-188-5p	ENSMUSG00000024902	Mrpl11	0.012662	0.996652	-2.20972	0.318876	-1.16385	0.646532	NO
mmu-miR-331-3p	ENSMUSG00000024902	Mrpl11	0.012662	0.996652	-2.04862	0.000874315	-1.512	0.0611883	NO
mmu-miR-423-5p	ENSMUSG00000024901	Peli3	-0.223688	0.623239	0.208863	0.685655	-1.52058	0.609909	NO
mmu-miR-337-5p	ENSMUSG00000024901	Peli3	-0.223688	0.623239	-0.0408363	0.833174	-1.33065	0.709559	NO
mmu-miR-34b-3p	ENSMUSG00000063904	Dpp3	-0.0732341	0.996652	-0.236776	0.643843	-2.05237	0.19094	NO
mmu-miR-342-3p	ENSMUSG00000063904	Dpp3	-0.0732341	0.996652	-0.153595	0.696257	-1.76212	0.42733	NO
mmu-miR-151-5p	ENSMUSG00000063904	Dpp3	-0.0732341	0.996652	-0.0473167	0.801413	0.0282668	0.900961	NO
mmu-miR-673-5p	ENSMUSG00000006457	Actn3	-0.030879	0.996652	-0.264954	0.536775	-0.680037	0.0343531	NO
mmu-miR-423-5p	ENSMUSG00000006457	Actn3	-0.030879	0.996652	0.208863	0.685655	-1.52058	0.609909	NO
mmu-miR-139-5p	ENSMUSG00000034108	Ccs	-0.0318807	0.996652	-0.0705343	0.816628	-0.955541	0.548138	NO
mmu-miR-666-3p	ENSMUSG00000034108	Ccs	-0.0318807	0.996652	-0.157681	0.726433	-3.3675	0.194747	NO
mmu-miR-574-3p	ENSMUSG00000006456	Rbm14	0.0564435	0.996652	-1.00306	0.0201434	3.42572	0.263154	NO
mmu-miR-331-3p	ENSMUSG00000006456	Rbm14	0.0564435	0.996652	-2.04862	0.000874315	-1.512	0.0611883	NO
mmu-miR-151-5p	ENSMUSG00000033760	Rbm4b	0.162488	0.889785	-0.0473167	0.801413	0.0282668	0.900961	NO
mmu-miR-671-5p	ENSMUSG00000067889	Sptbn2	-0.0894298	0.996652	-0.658749	0.352425	-1.92348	0.54595	NO
mmu-miR-423-5p	ENSMUSG00000071691	Top6bl	-0.186599	0.996652	0.208863	0.685655	-1.52058	0.609909	NO
mmu-miR-139-5p	ENSMUSG00000071691	Top6bl	-0.186599	0.996652	-0.0705343	0.816628	-0.955541	0.548138	NO
mmu-miR-369-5p	ENSMUSG00000071691	Top6bl	-0.186599	0.996652	-0.0348029	0.908875	-0.633128	0.521823	NO
mmu-miR-666-3p	ENSMUSG00000071691	Top6bl	-0.186599	0.996652	-0.157681	0.726433	-3.3675	0.194747	NO
mmu-miR-666-3p	ENSMUSG00000045045	Lrfn4	-0.1172	0.996652	-0.157681	0.726433	-3.3675	0.194747	NO
mmu-miR-188-5p	ENSMUSG00000024889	Rce1	-0.0686568	0.996652	-2.20972	0.318876	-1.16385	0.646532	NO
mmu-miR-409-5p	ENSMUSG00000024889	Rce1	-0.0686568	0.996652	1.24524	0.0614095	-1.5346	0.619529	NO
mmu-miR-151-5p	ENSMUSG00000024889	Rce1	-0.0686568	0.996652	-0.0473167	0.801413	0.0282668	0.900961	NO
mmu-miR-671-5p	ENSMUSG00000024889	Rce1	-0.0686568	0.996652	-0.658749	0.352425	-1.92348	0.54595	NO
mmu-miR-296-5p	ENSMUSG00000024889	Rce1	-0.0686568	0.996652	-1.3928	0.000171955	-3.00266	0.0124473	NO
mmu-miR-673-5p	ENSMUSG00000024892	Pcx	-0.0609176	0.996652	-0.264954	0.536775	-0.680037	0.0343531	NO
mmu-miR-671-5p	ENSMUSG00000042041	2010003K11Rik	2.32635	0.996652	-0.658749	0.352425	-1.92348	0.54595	NO
mmu-miR-423-3p	ENSMUSG00000041845	Rhod	1.19697	0.60204	-0.606918	0.275113	-0.977902	0.338619	NO
mmu-miR-423-5p	ENSMUSG00000041845	Rhod	1.19697	0.60204	0.208863	0.685655	-1.52058	0.609909	NO
mmu-miR-369-5p	ENSMUSG00000054611	Kdm2a	-0.0246953	0.996652	-0.0348029	0.908875	-0.633128	0.521823	NO
mmu-miR-139-3p	ENSMUSG00000024858	Grk2	-0.201887	0.679592	-0.176213	0.806923	-0.797117	0.298897	NO
mmu-miR-296-5p	ENSMUSG00000024858	Grk2	-0.201887	0.679592	-1.3928	0.000171955	-3.00266	0.0124473	NO
mmu-miR-139-5p	ENSMUSG00000005986	Ankrd13d	0.0113014	0.996652	-0.0705343	0.816628	-0.955541	0.548138	NO
mmu-miR-331-3p	ENSMUSG00000034616	Ssh3	0.0660323	0.996652	-2.04862	0.000874315	-1.512	0.0611883	NO
mmu-miR-296-5p	ENSMUSG00000034616	Ssh3	0.0660323	0.996652	-1.3928	0.000171955	-3.00266	0.0124473	NO
mmu-miR-666-3p	ENSMUSG00000034616	Ssh3	0.0660323	0.996652	-0.157681	0.726433	-3.3675	0.194747	NO
mmu-miR-671-5p	ENSMUSG00000040385	Ppp1ca	-0.102977	0.996652	-0.658749	0.352425	-1.92348	0.54595	NO
mmu-miR-666-3p	ENSMUSG00000040385	Ppp1ca	-0.102977	0.996652	-0.157681	0.726433	-3.3675	0.194747	NO
mmu-miR-139-3p	ENSMUSG00000040247	Tbc1d10c	0.157085	0.996652	-0.176213	0.806923	-0.797117	0.298897	NO
mmu-miR-188-5p	ENSMUSG00000040247	Tbc1d10c	0.157085	0.996652	-2.20972	0.318876	-1.16385	0.646532	NO
mmu-miR-671-5p	ENSMUSG00000040247	Tbc1d10c	0.157085	0.996652	-0.658749	0.352425	-1.92348	0.54595	NO
mmu-miR-151-5p	ENSMUSG00000040247	Tbc1d10c	0.157085	0.996652	-0.0473167	0.801413	0.0282668	0.900961	NO
mmu-miR-34b-3p	ENSMUSG00000045826	Ptprcap	NA	NA	-0.236776	0.643843	-2.05237	0.19094	NO
mmu-miR-423-3p	ENSMUSG00000045826	Ptprcap	NA	NA	-0.606918	0.275113	-0.977902	0.338619	NO
mmu-miR-342-3p	ENSMUSG00000024830	Rps6kb2	0.0411925	0.996652	-0.153595	0.696257	-1.76212	0.42733	NO
mmu-miR-151-5p	ENSMUSG00000024835	Coro1b	-0.0162003	0.996652	-0.0473167	0.801413	0.0282668	0.900961	NO
mmu-miR-296-5p	ENSMUSG00000024835	Coro1b	-0.0162003	0.996652	-1.3928	0.000171955	-3.00266	0.0124473	NO
mmu-miR-139-3p	ENSMUSG00000024851	Pitpnm1	-0.0576854	0.996652	-0.176213	0.806923	-0.797117	0.298897	NO
mmu-miR-139-5p	ENSMUSG00000024851	Pitpnm1	-0.0576854	0.996652	-0.0705343	0.816628	-0.955541	0.548138	NO
mmu-miR-409-5p	ENSMUSG00000024851	Pitpnm1	-0.0576854	0.996652	1.24524	0.0614095	-1.5346	0.619529	NO
mmu-miR-331-3p	ENSMUSG00000024851	Pitpnm1	-0.0576854	0.996652	-2.04862	0.000874315	-1.512	0.0611883	NO
mmu-miR-296-5p	ENSMUSG00000024851	Pitpnm1	-0.0576854	0.996652	-1.3928	0.000171955	-3.00266	0.0124473	NO
mmu-miR-671-5p	ENSMUSG00000024856	Cdk2ap2	-0.0103403	0.99841	-0.658749	0.352425	-1.92348	0.54595	NO
mmu-miR-151-5p	ENSMUSG00000024856	Cdk2ap2	-0.0103403	0.99841	-0.0473167	0.801413	0.0282668	0.900961	NO
mmu-miR-423-3p	ENSMUSG00000024851	Pitpnm1	-0.0576854	0.996652	-0.606918	0.275113	-0.977902	0.338619	NO
mmu-miR-342-3p	ENSMUSG00000024851	Pitpnm1	-0.0576854	0.996652	-0.153595	0.696257	-1.76212	0.42733	NO
mmu-miR-139-3p	ENSMUSG00000024871	Doc2g	-0.178251	0.996652	-0.176213	0.806923	-0.797117	0.298897	NO
mmu-miR-673-5p	ENSMUSG00000037477	Tbx10	-0.978779	0.996652	-0.264954	0.536775	-0.680037	0.0343531	NO
mmu-miR-139-3p	ENSMUSG00000037477	Tbx10	-0.978779	0.996652	-0.176213	0.806923	-0.797117	0.298897	NO
mmu-miR-151-3p	ENSMUSG00000037477	Tbx10	-0.978779	0.996652	0.150024	0.579751	-0.191302	0.306068	NO
mmu-miR-188-5p	ENSMUSG00000024885	Aldh3b1	-0.0569463	0.996652	-2.20972	0.318876	-1.16385	0.646532	NO
mmu-miR-673-5p	ENSMUSG00000024843	Chka	0.0373003	0.996652	-0.264954	0.536775	-0.680037	0.0343531	NO
mmu-miR-666-3p	ENSMUSG00000024843	Chka	0.0373003	0.996652	-0.157681	0.726433	-3.3675	0.194747	NO
mmu-miR-139-5p	ENSMUSG00000045098	Kmt5b	-0.0274412	0.996652	-0.0705343	0.816628	-0.955541	0.548138	NO
mmu-miR-501-3p	ENSMUSG00000035372	1810055G02Rik	-0.115049	0.996652	0.31491	0.302354	0.783282	0.221205	NO
mmu-miR-151-5p	ENSMUSG00000035372	1810055G02Rik	-0.115049	0.996652	-0.0473167	0.801413	0.0282668	0.900961	NO
mmu-miR-188-5p	ENSMUSG00000024913	Lrp5	0.129822	0.996652	-2.20972	0.318876	-1.16385	0.646532	NO
mmu-miR-673-5p	ENSMUSG00000024905	Tesmin	0.223753	0.996652	-0.264954	0.536775	-0.680037	0.0343531	NO
mmu-miR-532-5p	ENSMUSG00000024905	Tesmin	0.223753	0.996652	-0.0375693	0.883907	-2.41669	0.0677441	NO
mmu-miR-501-3p	ENSMUSG00000024829	Mrpl21	-0.123113	0.996652	0.31491	0.302354	0.783282	0.221205	NO
mmu-miR-337-5p	ENSMUSG00000024829	Mrpl21	-0.123113	0.996652	-0.0408363	0.833174	-1.33065	0.709559	NO
mmu-miR-369-3p	ENSMUSG00000024829	Mrpl21	-0.123113	0.996652	0.217237	0.643052	0.479301	0.884751	NO
mmu-miR-671-5p	ENSMUSG00000016494	Cd34	-0.157197	0.996652	-0.658749	0.352425	-1.92348	0.54595	NO
mmu-miR-342-3p	ENSMUSG00000026640	Plxna2	-0.113722	0.996652	-0.153595	0.696257	-1.76212	0.42733	NO
mmu-miR-501-3p	ENSMUSG00000016179	Camk1g	-0.250337	0.943119	0.31491	0.302354	0.783282	0.221205	NO
mmu-miR-151-5p	ENSMUSG00000016179	Camk1g	-0.250337	0.943119	-0.0473167	0.801413	0.0282668	0.900961	NO
mmu-miR-423-3p	ENSMUSG00000026639	Lamb3	0.0642243	0.996652	-0.606918	0.275113	-0.977902	0.338619	NO
mmu-miR-139-3p	ENSMUSG00000026639	Lamb3	0.0642243	0.996652	-0.176213	0.806923	-0.797117	0.298897	NO
mmu-miR-331-3p	ENSMUSG00000026639	Lamb3	0.0642243	0.996652	-2.04862	0.000874315	-1.512	0.0611883	NO
mmu-miR-423-3p	ENSMUSG00000009633	G0s2	0.0406927	0.996652	-0.606918	0.275113	-0.977902	0.338619	NO
mmu-miR-188-5p	ENSMUSG00000009633	G0s2	0.0406927	0.996652	-2.20972	0.318876	-1.16385	0.646532	NO
mmu-miR-338-3p	ENSMUSG00000009633	G0s2	0.0406927	0.996652	0.807797	0.0377321	0.545226	0.240263	NO
mmu-miR-673-5p	ENSMUSG00000016194	Hsd11b1	-0.281839	0.52103	-0.264954	0.536775	-0.680037	0.0343531	NO
mmu-miR-342-3p	ENSMUSG00000016181	Utp25	-0.0577288	0.996652	-0.153595	0.696257	-1.76212	0.42733	NO
mmu-miR-34b-3p	ENSMUSG00000037395	Rcor3	0.0827634	0.996652	-0.236776	0.643843	-2.05237	0.19094	NO
mmu-miR-423-5p	ENSMUSG00000037395	Rcor3	0.0827634	0.996652	0.208863	0.685655	-1.52058	0.609909	NO
mmu-miR-188-5p	ENSMUSG00000037395	Rcor3	0.0827634	0.996652	-2.20972	0.318876	-1.16385	0.646532	NO
mmu-miR-139-5p	ENSMUSG00000026622	Nek2	-0.11573	0.996652	-0.0705343	0.816628	-0.955541	0.548138	NO
mmu-miR-409-5p	ENSMUSG00000037461	Ints7	0.35224	0.411687	1.24524	0.0614095	-1.5346	0.619529	NO
mmu-miR-369-3p	ENSMUSG00000037461	Ints7	0.35224	0.411687	0.217237	0.643052	0.479301	0.884751	NO
mmu-miR-666-3p	ENSMUSG00000037499	Nenf	-0.113587	0.996652	-0.157681	0.726433	-3.3675	0.194747	NO
mmu-miR-501-3p	ENSMUSG00000026630	Batf3	-0.0957933	0.996652	0.31491	0.302354	0.783282	0.221205	NO
mmu-miR-331-3p	ENSMUSG00000026630	Batf3	-0.0957933	0.996652	-2.04862	0.000874315	-1.512	0.0611883	NO
mmu-miR-409-5p	ENSMUSG00000062510	Nsl1	-0.325921	0.996652	1.24524	0.0614095	-1.5346	0.619529	NO
mmu-miR-338-3p	ENSMUSG00000062510	Nsl1	-0.325921	0.996652	0.807797	0.0377321	0.545226	0.240263	NO
mmu-miR-139-5p	ENSMUSG00000026634	Angel2	-0.0970339	0.996652	-0.0705343	0.816628	-0.955541	0.548138	NO
mmu-miR-574-3p	ENSMUSG00000089872	Rps6kc1	-0.132258	0.996652	-1.00306	0.0201434	3.42572	0.263154	NO
mmu-miR-188-5p	ENSMUSG00000089872	Rps6kc1	-0.132258	0.996652	-2.20972	0.318876	-1.16385	0.646532	NO
mmu-miR-423-3p	ENSMUSG00000026603	Smyd2	-0.0998184	0.996652	-0.606918	0.275113	-0.977902	0.338619	NO
mmu-miR-369-3p	ENSMUSG00000026604	Ptpn14	0.267335	0.618316	0.217237	0.643052	0.479301	0.884751	NO
mmu-miR-139-5p	ENSMUSG00000037624	Kcnk2	-0.104652	0.996652	-0.0705343	0.816628	-0.955541	0.548138	NO
mmu-miR-34b-3p	ENSMUSG00000026609	Ush2a	-0.580386	0.996652	-0.236776	0.643843	-2.05237	0.19094	NO
mmu-miR-673-5p	ENSMUSG00000026609	Ush2a	-0.580386	0.996652	-0.264954	0.536775	-0.680037	0.0343531	NO
mmu-miR-369-5p	ENSMUSG00000026609	Ush2a	-0.580386	0.996652	-0.0348029	0.908875	-0.633128	0.521823	NO
mmu-miR-151-5p	ENSMUSG00000039210	Gpatch2	0.0548525	0.996652	-0.0473167	0.801413	0.0282668	0.900961	NO
mmu-miR-666-3p	ENSMUSG00000039210	Gpatch2	0.0548525	0.996652	-0.157681	0.726433	-3.3675	0.194747	NO
mmu-miR-337-5p	ENSMUSG00000001305	Rrp15	-0.253549	0.835294	-0.0408363	0.833174	-1.33065	0.709559	NO
mmu-miR-671-3p	ENSMUSG00000001305	Rrp15	-0.253549	0.835294	-0.383537	0.273755	-1.14401	0.674049	NO
mmu-miR-671-5p	ENSMUSG00000001305	Rrp15	-0.253549	0.835294	-0.658749	0.352425	-1.92348	0.54595	NO
mmu-miR-342-3p	ENSMUSG00000039246	Lyplal1	0.00734288	0.99841	-0.153595	0.696257	-1.76212	0.42733	NO
mmu-miR-532-5p	ENSMUSG00000026618	Iars2	-0.071558	0.996652	-0.0375693	0.883907	-2.41669	0.0677441	NO
mmu-miR-337-5p	ENSMUSG00000026620	Mark1	-0.124441	0.996652	-0.0408363	0.833174	-1.33065	0.709559	NO
mmu-miR-671-3p	ENSMUSG00000073481	Mtarc2	0.0382674	0.996652	-0.383537	0.273755	-1.14401	0.674049	NO
mmu-miR-501-3p	ENSMUSG00000026621	Mtarc1	-0.562399	0.996652	0.31491	0.302354	0.783282	0.221205	NO
mmu-miR-188-5p	ENSMUSG00000026621	Mtarc1	-0.562399	0.996652	-2.20972	0.318876	-1.16385	0.646532	NO
mmu-miR-532-5p	ENSMUSG00000039377	Hlx	-0.167439	0.996652	-0.0375693	0.883907	-2.41669	0.0677441	NO
mmu-miR-671-3p	ENSMUSG00000039377	Hlx	-0.167439	0.996652	-0.383537	0.273755	-1.14401	0.674049	NO
mmu-miR-331-3p	ENSMUSG00000039377	Hlx	-0.167439	0.996652	-2.04862	0.000874315	-1.512	0.0611883	NO
mmu-miR-331-3p	ENSMUSG00000038576	Susd4	-0.0938059	0.996652	-2.04862	0.000874315	-1.512	0.0611883	NO
mmu-miR-369-5p	ENSMUSG00000044854	1700056E22Rik	-0.410466	0.996652	-0.0348029	0.908875	-0.633128	0.521823	NO
mmu-miR-532-5p	ENSMUSG00000043429	Ccdc185	-1.45141	0.996652	-0.0375693	0.883907	-2.41669	0.0677441	NO
mmu-miR-151-5p	ENSMUSG00000043429	Ccdc185	-1.45141	0.996652	-0.0473167	0.801413	0.0282668	0.900961	NO
mmu-miR-188-5p	ENSMUSG00000038599	Capn8	4.0629	0.975614	-2.20972	0.318876	-1.16385	0.646532	NO
mmu-miR-409-5p	ENSMUSG00000026509	Capn2	-0.0274777	0.996652	1.24524	0.0614095	-1.5346	0.619529	NO
mmu-miR-337-5p	ENSMUSG00000026511	Srp9	0.228563	0.996652	-0.0408363	0.833174	-1.33065	0.709559	NO
mmu-miR-666-3p	ENSMUSG00000056699	Gm5533	0.357412	0.996652	-0.157681	0.726433	-3.3675	0.194747	NO
mmu-miR-574-3p	ENSMUSG00000026514	Cnih3	-0.182839	0.986239	-1.00306	0.0201434	3.42572	0.263154	NO
mmu-miR-337-5p	ENSMUSG00000038733	Wdr26	-0.0184745	0.996652	-0.0408363	0.833174	-1.33065	0.709559	NO
mmu-miR-151-3p	ENSMUSG00000026516	Nvl	0.179377	0.996652	0.150024	0.579751	-0.191302	0.306068	NO
mmu-miR-666-3p	ENSMUSG00000026516	Nvl	0.179377	0.996652	-0.157681	0.726433	-3.3675	0.194747	NO
mmu-miR-673-5p	ENSMUSG00000026519	Tmem63a	-0.0309513	0.996652	-0.264954	0.536775	-0.680037	0.0343531	NO
mmu-miR-409-5p	ENSMUSG00000026519	Tmem63a	-0.0309513	0.996652	1.24524	0.0614095	-1.5346	0.619529	NO
mmu-miR-671-3p	ENSMUSG00000026519	Tmem63a	-0.0309513	0.996652	-0.383537	0.273755	-1.14401	0.674049	NO
mmu-miR-296-5p	ENSMUSG00000026519	Tmem63a	-0.0309513	0.996652	-1.3928	0.000171955	-3.00266	0.0124473	NO
mmu-miR-151-3p	ENSMUSG00000038793	Lefty1	4.40811	NA	0.150024	0.579751	-0.191302	0.306068	NO
mmu-miR-151-5p	ENSMUSG00000038793	Lefty1	4.40811	NA	-0.0473167	0.801413	0.0282668	0.900961	NO
mmu-miR-501-3p	ENSMUSG00000066652	Lefty2	0.28146	0.996652	0.31491	0.302354	0.783282	0.221205	NO
mmu-miR-151-3p	ENSMUSG00000026499	Acbd3	-0.0314695	0.996652	0.150024	0.579751	-0.191302	0.306068	NO
mmu-miR-139-3p	ENSMUSG00000010609	Psen2	-0.0328645	0.996652	-0.176213	0.806923	-0.797117	0.298897	NO
mmu-miR-139-5p	ENSMUSG00000010609	Psen2	-0.0328645	0.996652	-0.0705343	0.816628	-0.955541	0.548138	NO
mmu-miR-501-3p	ENSMUSG00000010609	Psen2	-0.0328645	0.996652	0.31491	0.302354	0.783282	0.221205	NO
mmu-miR-331-3p	ENSMUSG00000121653		NA	NA	-2.04862	0.000874315	-1.512	0.0611883	NO
mmu-miR-501-3p	ENSMUSG00000026490	Cdc42bpa	-0.0251906	0.996652	0.31491	0.302354	0.783282	0.221205	NO
mmu-miR-574-3p	ENSMUSG00000026490	Cdc42bpa	-0.0251906	0.996652	-1.00306	0.0201434	3.42572	0.263154	NO
mmu-miR-574-3p	ENSMUSG00000038936	Sccpdh	-0.0273996	0.996652	-1.00306	0.0201434	3.42572	0.263154	NO
mmu-miR-666-3p	ENSMUSG00000055067	Smyd3	-0.113045	0.996652	-0.157681	0.726433	-3.3675	0.194747	NO
mmu-miR-409-5p	ENSMUSG00000015962	Spmip3	-0.780442	0.938686	1.24524	0.0614095	-1.5346	0.619529	NO
mmu-miR-338-3p	ENSMUSG00000063659	Zbtb18	-0.121489	0.996652	0.807797	0.0377321	0.545226	0.240263	NO
mmu-miR-151-3p	ENSMUSG00000019699	Akt3	-0.0488402	0.996652	0.150024	0.579751	-0.191302	0.306068	NO
mmu-miR-574-3p	ENSMUSG00000057335	Cep170	-0.0731632	0.996652	-1.00306	0.0201434	3.42572	0.263154	NO
mmu-miR-409-5p	ENSMUSG00000026523	Wdr64	NA	NA	1.24524	0.0614095	-1.5346	0.619529	NO
mmu-miR-671-3p	ENSMUSG00000026523	Wdr64	NA	NA	-0.383537	0.273755	-1.14401	0.674049	NO
mmu-miR-331-3p	ENSMUSG00000026523	Wdr64	NA	NA	-2.04862	0.000874315	-1.512	0.0611883	NO
mmu-miR-139-5p	ENSMUSG00000039783	Kmo	-0.432432	0.996652	-0.0705343	0.816628	-0.955541	0.548138	NO
mmu-miR-188-5p	ENSMUSG00000039783	Kmo	-0.432432	0.996652	-2.20972	0.318876	-1.16385	0.646532	NO
mmu-miR-151-3p	ENSMUSG00000039783	Kmo	-0.432432	0.996652	0.150024	0.579751	-0.191302	0.306068	NO
mmu-miR-342-3p	ENSMUSG00000026526	Fh1	-0.0895381	0.996652	-0.153595	0.696257	-1.76212	0.42733	NO
mmu-miR-423-5p	ENSMUSG00000050788	Or10z1	-1.41705	0.996652	0.208863	0.685655	-1.52058	0.609909	NO
mmu-miR-139-5p	ENSMUSG00000050788	Or10z1	-1.41705	0.996652	-0.0705343	0.816628	-0.955541	0.548138	NO
mmu-miR-338-3p	ENSMUSG00000050788	Or10z1	-1.41705	0.996652	0.807797	0.0377321	0.545226	0.240263	NO
mmu-miR-409-5p	ENSMUSG00000026532	Spta1	2.04241	0.310817	1.24524	0.0614095	-1.5346	0.619529	NO
mmu-miR-338-3p	ENSMUSG00000055033	Or6k2	-1.41705	0.996652	0.807797	0.0377321	0.545226	0.240263	NO
mmu-miR-188-5p	ENSMUSG00000047048	Or10aa3	-1.45141	0.996652	-2.20972	0.318876	-1.16385	0.646532	NO
mmu-miR-501-3p	ENSMUSG00000045381	Or10aa1	2.79741	0.996652	0.31491	0.302354	0.783282	0.221205	NO
mmu-miR-574-3p	ENSMUSG00000073491	Ifi213	1.89834	0.996652	-1.00306	0.0201434	3.42572	0.263154	NO
mmu-miR-423-5p	ENSMUSG00000005338	Cadm3	-0.0947833	0.996652	0.208863	0.685655	-1.52058	0.609909	NO
mmu-miR-501-3p	ENSMUSG00000005338	Cadm3	-0.0947833	0.996652	0.31491	0.302354	0.783282	0.221205	NO
mmu-miR-331-3p	ENSMUSG00000005338	Cadm3	-0.0947833	0.996652	-2.04862	0.000874315	-1.512	0.0611883	NO
mmu-miR-671-5p	ENSMUSG00000005338	Cadm3	-0.0947833	0.996652	-0.658749	0.352425	-1.92348	0.54595	NO
mmu-miR-296-5p	ENSMUSG00000005338	Cadm3	-0.0947833	0.996652	-1.3928	0.000171955	-3.00266	0.0124473	NO
mmu-miR-574-3p	ENSMUSG00000037872	Ackr1	-0.0963974	0.996652	-1.00306	0.0201434	3.42572	0.263154	NO
mmu-miR-666-3p	ENSMUSG00000005339	Fcer1a	NA	NA	-0.157681	0.726433	-3.3675	0.194747	NO
mmu-miR-673-5p	ENSMUSG00000058981	Or10j7	2.32635	0.996652	-0.264954	0.536775	-0.680037	0.0343531	NO
mmu-miR-188-5p	ENSMUSG00000058981	Or10j7	2.32635	0.996652	-2.20972	0.318876	-1.16385	0.646532	NO
mmu-miR-409-5p	ENSMUSG00000058981	Or10j7	2.32635	0.996652	1.24524	0.0614095	-1.5346	0.619529	NO
mmu-miR-409-5p	ENSMUSG00000037942	Crp	0.33651	0.996652	1.24524	0.0614095	-1.5346	0.619529	NO
mmu-miR-139-3p	ENSMUSG00000026544	Dusp23	-0.280652	0.996652	-0.176213	0.806923	-0.797117	0.298897	NO
mmu-miR-337-5p	ENSMUSG00000026544	Dusp23	-0.280652	0.996652	-0.0408363	0.833174	-1.33065	0.709559	NO
mmu-miR-532-5p	ENSMUSG00000053318	Slamf8	0.49812	0.996652	-0.0375693	0.883907	-2.41669	0.0677441	NO
mmu-miR-151-5p	ENSMUSG00000053318	Slamf8	0.49812	0.996652	-0.0473167	0.801413	0.0282668	0.900961	NO
mmu-miR-423-3p	ENSMUSG00000049598	Vsig8	0.382263	0.996652	-0.606918	0.275113	-0.977902	0.338619	NO
mmu-miR-331-3p	ENSMUSG00000049598	Vsig8	0.382263	0.996652	-2.04862	0.000874315	-1.512	0.0611883	NO
mmu-miR-342-3p	ENSMUSG00000049598	Vsig8	0.382263	0.996652	-0.153595	0.696257	-1.76212	0.42733	NO
mmu-miR-671-5p	ENSMUSG00000049598	Vsig8	0.382263	0.996652	-0.658749	0.352425	-1.92348	0.54595	NO
mmu-miR-296-5p	ENSMUSG00000049598	Vsig8	0.382263	0.996652	-1.3928	0.000171955	-3.00266	0.0124473	NO
mmu-miR-151-3p	ENSMUSG00000026546	Cfap45	0.031961	0.996652	0.150024	0.579751	-0.191302	0.306068	NO
mmu-miR-342-3p	ENSMUSG00000026546	Cfap45	0.031961	0.996652	-0.153595	0.696257	-1.76212	0.42733	NO
mmu-miR-151-5p	ENSMUSG00000026546	Cfap45	0.031961	0.996652	-0.0473167	0.801413	0.0282668	0.900961	NO
mmu-miR-574-3p	ENSMUSG00000037995	Igsf9	0.0684824	0.996652	-1.00306	0.0201434	3.42572	0.263154	NO
mmu-miR-423-5p	ENSMUSG00000037995	Igsf9	0.0684824	0.996652	0.208863	0.685655	-1.52058	0.609909	NO
mmu-miR-501-3p	ENSMUSG00000037995	Igsf9	0.0684824	0.996652	0.31491	0.302354	0.783282	0.221205	NO
mmu-miR-342-3p	ENSMUSG00000037995	Igsf9	0.0684824	0.996652	-0.153595	0.696257	-1.76212	0.42733	NO
mmu-miR-151-5p	ENSMUSG00000026548	Slamf9	0.186522	0.996652	-0.0473167	0.801413	0.0282668	0.900961	NO
mmu-miR-673-5p	ENSMUSG00000007097	Atp1a2	-0.171098	0.378094	-0.264954	0.536775	-0.680037	0.0343531	NO
mmu-miR-337-5p	ENSMUSG00000038034	Igsf8	-0.110364	0.996652	-0.0408363	0.833174	-1.33065	0.709559	NO
mmu-miR-151-5p	ENSMUSG00000007122	Casq1	-0.0737822	0.996652	-0.0473167	0.801413	0.0282668	0.900961	NO
mmu-miR-34b-3p	ENSMUSG00000003464	Pex19	-0.0841	0.996652	-0.236776	0.643843	-2.05237	0.19094	NO
mmu-miR-338-3p	ENSMUSG00000026553	Copa	-0.0612498	0.996652	0.807797	0.0377321	0.545226	0.240263	NO
mmu-miR-337-5p	ENSMUSG00000003458	Ncstn	-0.0842204	0.996652	-0.0408363	0.833174	-1.33065	0.709559	NO
mmu-miR-501-3p	ENSMUSG00000051251	Nhlh1	0.81713	0.686246	0.31491	0.302354	0.783282	0.221205	NO
mmu-miR-532-5p	ENSMUSG00000038209	Itln1	-1.99575	0.996652	-0.0375693	0.883907	-2.41669	0.0677441	NO
mmu-miR-423-3p	ENSMUSG00000060244	Alyref2	0.12443	0.996652	-0.606918	0.275113	-0.977902	0.338619	NO
mmu-miR-337-5p	ENSMUSG00000060244	Alyref2	0.12443	0.996652	-0.0408363	0.833174	-1.33065	0.709559	NO
mmu-miR-671-3p	ENSMUSG00000060244	Alyref2	0.12443	0.996652	-0.383537	0.273755	-1.14401	0.674049	NO
mmu-miR-501-3p	ENSMUSG00000038235	F11r	0.406541	0.793507	0.31491	0.302354	0.783282	0.221205	NO
mmu-miR-139-5p	ENSMUSG00000026641	Usf1	-0.126865	0.996652	-0.0705343	0.816628	-0.955541	0.548138	NO
mmu-miR-296-5p	ENSMUSG00000026641	Usf1	-0.126865	0.996652	-1.3928	0.000171955	-3.00266	0.0124473	NO
mmu-miR-139-5p	ENSMUSG00000048865	Arhgap30	0.120892	0.996652	-0.0705343	0.816628	-0.955541	0.548138	NO
mmu-miR-337-5p	ENSMUSG00000006412	Pfdn2	-0.127739	0.996652	-0.0408363	0.833174	-1.33065	0.709559	NO
mmu-miR-423-3p	ENSMUSG00000013973	Dedd	0.0954673	0.996652	-0.606918	0.275113	-0.977902	0.338619	NO
mmu-miR-673-5p	ENSMUSG00000013973	Dedd	0.0954673	0.996652	-0.264954	0.536775	-0.680037	0.0343531	NO
mmu-miR-501-3p	ENSMUSG00000013973	Dedd	0.0954673	0.996652	0.31491	0.302354	0.783282	0.221205	NO
mmu-miR-188-5p	ENSMUSG00000013973	Dedd	0.0954673	0.996652	-2.20972	0.318876	-1.16385	0.646532	NO
mmu-miR-671-5p	ENSMUSG00000013973	Dedd	0.0954673	0.996652	-0.658749	0.352425	-1.92348	0.54595	NO
mmu-miR-139-5p	ENSMUSG00000053483	Usp21	-0.00235378	0.99841	-0.0705343	0.816628	-0.955541	0.548138	NO
mmu-miR-666-3p	ENSMUSG00000053483	Usp21	-0.00235378	0.99841	-0.157681	0.726433	-3.3675	0.194747	NO
mmu-miR-423-5p	ENSMUSG00000052423	B4galt3	-0.0865845	0.996652	0.208863	0.685655	-1.52058	0.609909	NO
mmu-miR-188-5p	ENSMUSG00000052423	B4galt3	-0.0865845	0.996652	-2.20972	0.318876	-1.16385	0.646532	NO
mmu-miR-151-5p	ENSMUSG00000052423	B4galt3	-0.0865845	0.996652	-0.0473167	0.801413	0.0282668	0.900961	NO
mmu-miR-574-3p	ENSMUSG00000013593	Ndufs2	-0.128931	0.947126	-1.00306	0.0201434	3.42572	0.263154	NO
mmu-miR-342-3p	ENSMUSG00000013593	Ndufs2	-0.128931	0.947126	-0.153595	0.696257	-1.76212	0.42733	NO
mmu-miR-139-3p	ENSMUSG00000058715	Fcer1g	0.00593848	0.99841	-0.176213	0.806923	-0.797117	0.298897	NO
mmu-miR-501-3p	ENSMUSG00000058715	Fcer1g	0.00593848	0.99841	0.31491	0.302354	0.783282	0.221205	NO
mmu-miR-188-5p	ENSMUSG00000058715	Fcer1g	0.00593848	0.99841	-2.20972	0.318876	-1.16385	0.646532	NO
mmu-miR-337-5p	ENSMUSG00000005677	Nr1i3	-0.0283449	0.99841	-0.0408363	0.833174	-1.33065	0.709559	NO
mmu-miR-423-5p	ENSMUSG00000058076	Sdhc	-0.0704704	0.996652	0.208863	0.685655	-1.52058	0.609909	NO
mmu-miR-532-5p	ENSMUSG00000026649	Cfap126	0.142585	0.996652	-0.0375693	0.883907	-2.41669	0.0677441	NO
mmu-miR-338-3p	ENSMUSG00000026649	Cfap126	0.142585	0.996652	0.807797	0.0377321	0.545226	0.240263	NO
mmu-miR-151-3p	ENSMUSG00000026649	Cfap126	0.142585	0.996652	0.150024	0.579751	-0.191302	0.306068	NO
mmu-miR-139-3p	ENSMUSG00000026656	Fcgr2b	0.167338	0.996652	-0.176213	0.806923	-0.797117	0.298897	NO
mmu-miR-139-5p	ENSMUSG00000026656	Fcgr2b	0.167338	0.996652	-0.0705343	0.816628	-0.955541	0.548138	NO
mmu-miR-501-3p	ENSMUSG00000026656	Fcgr2b	0.167338	0.996652	0.31491	0.302354	0.783282	0.221205	NO
mmu-miR-188-5p	ENSMUSG00000026656	Fcgr2b	0.167338	0.996652	-2.20972	0.318876	-1.16385	0.646532	NO
mmu-miR-673-5p	ENSMUSG00000026659	Dusp12	-0.10667	0.996652	-0.264954	0.536775	-0.680037	0.0343531	NO
mmu-miR-409-5p	ENSMUSG00000026659	Dusp12	-0.10667	0.996652	1.24524	0.0614095	-1.5346	0.619529	NO
mmu-miR-338-3p	ENSMUSG00000026659	Dusp12	-0.10667	0.996652	0.807797	0.0377321	0.545226	0.240263	NO
mmu-miR-139-5p	ENSMUSG00000038463	Olfml2b	0.0615425	0.996652	-0.0705343	0.816628	-0.955541	0.548138	NO
mmu-miR-139-5p	ENSMUSG00000026667	Uhmk1	-0.0148212	0.996652	-0.0705343	0.816628	-0.955541	0.548138	NO
mmu-miR-423-5p	ENSMUSG00000026674	Ddr2	0.00147773	0.999652	0.208863	0.685655	-1.52058	0.609909	NO
mmu-miR-369-3p	ENSMUSG00000026683	Nuf2	0.303629	0.996652	0.217237	0.643052	0.479301	0.884751	NO
mmu-miR-151-3p	ENSMUSG00000052534	Pbx1	-0.119552	0.919745	0.150024	0.579751	-0.191302	0.306068	NO
mmu-miR-574-3p	ENSMUSG00000015843	Rxrg	-0.0550803	0.996652	-1.00306	0.0201434	3.42572	0.263154	NO
mmu-miR-501-3p	ENSMUSG00000015843	Rxrg	-0.0550803	0.996652	0.31491	0.302354	0.783282	0.221205	NO
mmu-miR-409-5p	ENSMUSG00000015843	Rxrg	-0.0550803	0.996652	1.24524	0.0614095	-1.5346	0.619529	NO
mmu-miR-188-5p	ENSMUSG00000015843	Rxrg	-0.0550803	0.996652	-2.20972	0.318876	-1.16385	0.646532	NO
mmu-miR-666-3p	ENSMUSG00000015843	Rxrg	-0.0550803	0.996652	-0.157681	0.726433	-3.3675	0.194747	NO
mmu-miR-409-5p	ENSMUSG00000026687	Aldh9a1	0.0871745	0.996652	1.24524	0.0614095	-1.5346	0.619529	NO
mmu-miR-151-3p	ENSMUSG00000026687	Aldh9a1	0.0871745	0.996652	0.150024	0.579751	-0.191302	0.306068	NO
mmu-miR-34b-3p	ENSMUSG00000026558	Uck2	-0.0714452	0.996652	-0.236776	0.643843	-2.05237	0.19094	NO
mmu-miR-423-5p	ENSMUSG00000026558	Uck2	-0.0714452	0.996652	0.208863	0.685655	-1.52058	0.609909	NO
mmu-miR-409-5p	ENSMUSG00000026558	Uck2	-0.0714452	0.996652	1.24524	0.0614095	-1.5346	0.619529	NO
mmu-miR-532-5p	ENSMUSG00000026563	Tada1	0.0122556	0.996652	-0.0375693	0.883907	-2.41669	0.0677441	NO
mmu-miR-409-5p	ENSMUSG00000026563	Tada1	0.0122556	0.996652	1.24524	0.0614095	-1.5346	0.619529	NO
mmu-miR-338-3p	ENSMUSG00000026564	Styxl2	-0.173005	0.996652	0.807797	0.0377321	0.545226	0.240263	NO
mmu-miR-151-5p	ENSMUSG00000026564	Styxl2	-0.173005	0.996652	-0.0473167	0.801413	0.0282668	0.900961	NO
mmu-miR-666-3p	ENSMUSG00000026565	Pou2f1	-0.0300059	0.996652	-0.157681	0.726433	-3.3675	0.194747	NO
mmu-miR-673-5p	ENSMUSG00000026565	Pou2f1	-0.0300059	0.996652	-0.264954	0.536775	-0.680037	0.0343531	NO
mmu-miR-671-5p	ENSMUSG00000026565	Pou2f1	-0.0300059	0.996652	-0.658749	0.352425	-1.92348	0.54595	NO
mmu-miR-423-5p	ENSMUSG00000005763	Cd247	0.150787	0.996652	0.208863	0.685655	-1.52058	0.609909	NO
mmu-miR-574-3p	ENSMUSG00000040713	Creg1	-0.0818285	0.996652	-1.00306	0.0201434	3.42572	0.263154	NO
mmu-miR-337-5p	ENSMUSG00000040713	Creg1	-0.0818285	0.996652	-0.0408363	0.833174	-1.33065	0.709559	NO
mmu-miR-34b-3p	ENSMUSG00000040723	Rcsd1	-0.0109466	0.99841	-0.236776	0.643843	-2.05237	0.19094	NO
mmu-miR-337-5p	ENSMUSG00000026566	Mpzl1	0.0483174	0.996652	-0.0408363	0.833174	-1.33065	0.709559	NO
mmu-miR-574-3p	ENSMUSG00000026571	Dcaf6	-0.0393099	0.996652	-1.00306	0.0201434	3.42572	0.263154	NO
mmu-miR-151-5p	ENSMUSG00000026571	Dcaf6	-0.0393099	0.996652	-0.0473167	0.801413	0.0282668	0.900961	NO
mmu-miR-666-3p	ENSMUSG00000040848	Sft2d2	0.0322228	0.996652	-0.157681	0.726433	-3.3675	0.194747	NO
mmu-miR-369-3p	ENSMUSG00000026573	Xcl1	-1.63466	0.996652	0.217237	0.643052	0.479301	0.884751	NO
mmu-miR-501-3p	ENSMUSG00000026572	Tbx19	0.599114	0.996652	0.31491	0.302354	0.783282	0.221205	NO
mmu-miR-423-3p	ENSMUSG00000026574	Dpt	0.416204	0.996652	-0.606918	0.275113	-0.977902	0.338619	NO
mmu-miR-34b-3p	ENSMUSG00000026576	Atp1b1	-0.0594746	0.996652	-0.236776	0.643843	-2.05237	0.19094	NO
mmu-miR-34b-3p	ENSMUSG00000026578	Ccdc181	-0.0553793	0.996652	-0.236776	0.643843	-2.05237	0.19094	NO
mmu-miR-139-3p	ENSMUSG00000026578	Ccdc181	-0.0553793	0.996652	-0.176213	0.806923	-0.797117	0.298897	NO
mmu-miR-338-3p	ENSMUSG00000026578	Ccdc181	-0.0553793	0.996652	0.807797	0.0377321	0.545226	0.240263	NO
mmu-miR-369-3p	ENSMUSG00000026578	Ccdc181	-0.0553793	0.996652	0.217237	0.643052	0.479301	0.884751	NO
mmu-miR-331-3p	ENSMUSG00000026578	Ccdc181	-0.0553793	0.996652	-2.04862	0.000874315	-1.512	0.0611883	NO
mmu-miR-296-5p	ENSMUSG00000026578	Ccdc181	-0.0553793	0.996652	-1.3928	0.000171955	-3.00266	0.0124473	NO
mmu-miR-574-3p	ENSMUSG00000026579	F5	2.44265	0.29878	-1.00306	0.0201434	3.42572	0.263154	NO
mmu-miR-139-3p	ENSMUSG00000041396	Mettl18	-0.019605	0.996652	-0.176213	0.806923	-0.797117	0.298897	NO
mmu-miR-342-3p	ENSMUSG00000041396	Mettl18	-0.019605	0.996652	-0.153595	0.696257	-1.76212	0.42733	NO
mmu-miR-501-3p	ENSMUSG00000041406	Firrm	0.356205	0.996652	0.31491	0.302354	0.783282	0.221205	NO
mmu-miR-151-3p	ENSMUSG00000041406	Firrm	0.356205	0.996652	0.150024	0.579751	-0.191302	0.306068	NO
mmu-miR-342-3p	ENSMUSG00000026584	Scyl3	-0.0278543	0.996652	-0.153595	0.696257	-1.76212	0.42733	NO
mmu-miR-501-3p	ENSMUSG00000040124	Gorab	0.0253136	0.996652	0.31491	0.302354	0.783282	0.221205	NO
mmu-miR-151-3p	ENSMUSG00000071890	Mroh9	-2.22544	0.996652	0.150024	0.579751	-0.191302	0.306068	NO
mmu-miR-369-5p	ENSMUSG00000026691	Fmo3	-2.01011	0.996652	-0.0348029	0.908875	-0.633128	0.521823	NO
mmu-miR-369-3p	ENSMUSG00000040181	Fmo1	0.253377	0.996652	0.217237	0.643052	0.479301	0.884751	NO
mmu-miR-151-3p	ENSMUSG00000040181	Fmo1	0.253377	0.996652	0.150024	0.579751	-0.191302	0.306068	NO
mmu-miR-501-3p	ENSMUSG00000026697	Myoc	-0.112298	0.996652	0.31491	0.302354	0.783282	0.221205	NO
mmu-miR-369-3p	ENSMUSG00000026697	Myoc	-0.112298	0.996652	0.217237	0.643052	0.479301	0.884751	NO
mmu-miR-331-3p	ENSMUSG00000026697	Myoc	-0.112298	0.996652	-2.04862	0.000874315	-1.512	0.0611883	NO
mmu-miR-151-5p	ENSMUSG00000026697	Myoc	-0.112298	0.996652	-0.0473167	0.801413	0.0282668	0.900961	NO
mmu-miR-369-5p	ENSMUSG00000026698	Pigc	-0.0410822	0.996652	-0.0348029	0.908875	-0.633128	0.521823	NO
mmu-miR-34b-3p	ENSMUSG00000053332	Gas5	0.0809208	0.996652	-0.236776	0.643843	-2.05237	0.19094	NO
mmu-miR-423-3p	ENSMUSG00000053332	Gas5	0.0809208	0.996652	-0.606918	0.275113	-0.977902	0.338619	NO
mmu-miR-532-5p	ENSMUSG00000053332	Gas5	0.0809208	0.996652	-0.0375693	0.883907	-2.41669	0.0677441	NO
mmu-miR-369-3p	ENSMUSG00000053332	Gas5	0.0809208	0.996652	0.217237	0.643052	0.479301	0.884751	NO
mmu-miR-501-3p	ENSMUSG00000026715	Serpinc1	-0.311926	0.996652	0.31491	0.302354	0.783282	0.221205	NO
mmu-miR-671-3p	ENSMUSG00000040423	Rc3h1	-0.0369926	0.996652	-0.383537	0.273755	-1.14401	0.674049	NO
mmu-miR-673-5p	ENSMUSG00000057499	Gm6177	0.727707	0.996652	-0.264954	0.536775	-0.680037	0.0343531	NO
mmu-miR-671-5p	ENSMUSG00000057499	Gm6177	0.727707	0.996652	-0.658749	0.352425	-1.92348	0.54595	NO
mmu-miR-369-5p	ENSMUSG00000014226	Cacybp	-0.0706933	0.996652	-0.0348029	0.908875	-0.633128	0.521823	NO
mmu-miR-369-5p	ENSMUSG00000061992	Gm4953	1.56411	0.996652	-0.0348029	0.908875	-0.633128	0.521823	NO
mmu-miR-338-3p	ENSMUSG00000026589	Sec16b	0.579769	0.996652	0.807797	0.0377321	0.545226	0.240263	NO
mmu-miR-34b-3p	ENSMUSG00000033488	Cryzl2	-0.0315716	0.996652	-0.236776	0.643843	-2.05237	0.19094	NO
mmu-miR-139-5p	ENSMUSG00000033488	Cryzl2	-0.0315716	0.996652	-0.0705343	0.816628	-0.955541	0.548138	NO
mmu-miR-532-5p	ENSMUSG00000033488	Cryzl2	-0.0315716	0.996652	-0.0375693	0.883907	-2.41669	0.0677441	NO
mmu-miR-151-3p	ENSMUSG00000033488	Cryzl2	-0.0315716	0.996652	0.150024	0.579751	-0.191302	0.306068	NO
mmu-miR-151-5p	ENSMUSG00000033488	Cryzl2	-0.0315716	0.996652	-0.0473167	0.801413	0.0282668	0.900961	NO
mmu-miR-337-5p	ENSMUSG00000070565	Rasal2	-0.00392696	0.99841	-0.0408363	0.833174	-1.33065	0.709559	NO
mmu-miR-671-5p	ENSMUSG00000026592	Tex35	0.743045	0.996652	-0.658749	0.352425	-1.92348	0.54595	NO
mmu-miR-139-5p	ENSMUSG00000063889	Crem	0.055238	0.996652	-0.0705343	0.816628	-0.955541	0.548138	NO
mmu-miR-338-3p	ENSMUSG00000063889	Crem	0.055238	0.996652	0.807797	0.0377321	0.545226	0.240263	NO
mmu-miR-331-3p	ENSMUSG00000063889	Crem	0.055238	0.996652	-2.04862	0.000874315	-1.512	0.0611883	NO
mmu-miR-151-3p	ENSMUSG00000063889	Crem	0.055238	0.996652	0.150024	0.579751	-0.191302	0.306068	NO
mmu-miR-574-3p	ENSMUSG00000024231	Cul2	-0.0384138	0.996652	-1.00306	0.0201434	3.42572	0.263154	NO
mmu-miR-673-5p	ENSMUSG00000024231	Cul2	-0.0384138	0.996652	-0.264954	0.536775	-0.680037	0.0343531	NO
mmu-miR-501-3p	ENSMUSG00000024231	Cul2	-0.0384138	0.996652	0.31491	0.302354	0.783282	0.221205	NO
mmu-miR-337-5p	ENSMUSG00000024231	Cul2	-0.0384138	0.996652	-0.0408363	0.833174	-1.33065	0.709559	NO
mmu-miR-423-5p	ENSMUSG00000024233	Lyzl1	NA	NA	0.208863	0.685655	-1.52058	0.609909	NO
mmu-miR-409-5p	ENSMUSG00000024233	Lyzl1	NA	NA	1.24524	0.0614095	-1.5346	0.619529	NO
mmu-miR-671-3p	ENSMUSG00000024233	Lyzl1	NA	NA	-0.383537	0.273755	-1.14401	0.674049	NO
mmu-miR-139-5p	ENSMUSG00000024235	Map3k8	0.243369	0.996652	-0.0705343	0.816628	-0.955541	0.548138	NO
mmu-miR-369-5p	ENSMUSG00000024234	Mtpap	-0.0940452	0.996652	-0.0348029	0.908875	-0.633128	0.521823	NO
mmu-miR-673-5p	ENSMUSG00000033960	Jcad	-0.112488	0.996652	-0.264954	0.536775	-0.680037	0.0343531	NO
mmu-miR-342-3p	ENSMUSG00000033960	Jcad	-0.112488	0.996652	-0.153595	0.696257	-1.76212	0.42733	NO
mmu-miR-338-3p	ENSMUSG00000024236	Svil	0.105456	0.996652	0.807797	0.0377321	0.545226	0.240263	NO
mmu-miR-666-3p	ENSMUSG00000024236	Svil	0.105456	0.996652	-0.157681	0.726433	-3.3675	0.194747	NO
mmu-miR-501-3p	ENSMUSG00000050945	Zfp438	0.0255286	0.996652	0.31491	0.302354	0.783282	0.221205	NO
mmu-miR-574-3p	ENSMUSG00000041225	Arhgap12	-0.0308206	0.996652	-1.00306	0.0201434	3.42572	0.263154	NO
mmu-miR-532-5p	ENSMUSG00000073640	Rpl27-ps3	0.32376	0.996652	-0.0375693	0.883907	-2.41669	0.0677441	NO
mmu-miR-673-5p	ENSMUSG00000024240	Epc1	0.0061145	0.997001	-0.264954	0.536775	-0.680037	0.0343531	NO
mmu-miR-139-5p	ENSMUSG00000024240	Epc1	0.0061145	0.997001	-0.0705343	0.816628	-0.955541	0.548138	NO
mmu-miR-423-5p	ENSMUSG00000036904	Fzd8	-0.00553158	0.99841	0.208863	0.685655	-1.52058	0.609909	NO
mmu-miR-34b-3p	ENSMUSG00000050996	Cetn1	NA	NA	-0.236776	0.643843	-2.05237	0.19094	NO
mmu-miR-369-3p	ENSMUSG00000047879	Usp14	-0.136191	0.837343	0.217237	0.643052	0.479301	0.884751	NO
mmu-miR-423-3p	ENSMUSG00000024290	Rock1	0.0071959	0.996652	-0.606918	0.275113	-0.977902	0.338619	NO
mmu-miR-34b-3p	ENSMUSG00000002477	Snrpd1	0.0574422	0.996652	-0.236776	0.643843	-2.05237	0.19094	NO
mmu-miR-139-5p	ENSMUSG00000002475	Abhd3	0.0501193	0.996652	-0.0705343	0.816628	-0.955541	0.548138	NO
mmu-miR-369-3p	ENSMUSG00000005836	Gata6	1.38702	0.996652	0.217237	0.643052	0.479301	0.884751	NO
mmu-miR-337-5p	ENSMUSG00000049411	Tmem241	-0.027385	0.996652	-0.0408363	0.833174	-1.33065	0.709559	NO
mmu-miR-574-3p	ENSMUSG00000024404	Riok3	0.0106579	0.996652	-1.00306	0.0201434	3.42572	0.263154	NO
mmu-miR-423-5p	ENSMUSG00000024424	Ttc39c	0.0679716	0.996652	0.208863	0.685655	-1.52058	0.609909	NO
mmu-miR-369-3p	ENSMUSG00000024424	Ttc39c	0.0679716	0.996652	0.217237	0.643052	0.479301	0.884751	NO
mmu-miR-139-3p	ENSMUSG00000024430	Cabyr	-0.100072	0.996652	-0.176213	0.806923	-0.797117	0.298897	NO
mmu-miR-337-5p	ENSMUSG00000024430	Cabyr	-0.100072	0.996652	-0.0408363	0.833174	-1.33065	0.709559	NO
mmu-miR-532-5p	ENSMUSG00000044252	Osbpl1a	-0.183991	0.412462	-0.0375693	0.883907	-2.41669	0.0677441	NO
mmu-miR-139-3p	ENSMUSG00000037346	Hrh4	-1.63466	0.996652	-0.176213	0.806923	-0.797117	0.298897	NO
mmu-miR-139-5p	ENSMUSG00000024420	Zfp521	0.251803	0.798472	-0.0705343	0.816628	-0.955541	0.548138	NO
mmu-miR-532-5p	ENSMUSG00000024420	Zfp521	0.251803	0.798472	-0.0375693	0.883907	-2.41669	0.0677441	NO
mmu-miR-666-3p	ENSMUSG00000053740	Gm6457	-0.628863	0.996652	-0.157681	0.726433	-3.3675	0.194747	NO
mmu-miR-139-5p	ENSMUSG00000036743	Psma8	0.790965	0.996652	-0.0705343	0.816628	-0.955541	0.548138	NO
mmu-miR-369-5p	ENSMUSG00000024411	Aqp4	-0.127275	0.996652	-0.0348029	0.908875	-0.633128	0.521823	NO
mmu-miR-338-3p	ENSMUSG00000047161	Chst9	0.0418434	0.996652	0.807797	0.0377321	0.545226	0.240263	NO
mmu-miR-139-5p	ENSMUSG00000046440	Gm5564	0.528205	0.996652	-0.0705343	0.816628	-0.955541	0.548138	NO
mmu-miR-338-3p	ENSMUSG00000063628	Gm7665	-2.53055	0.996652	0.807797	0.0377321	0.545226	0.240263	NO
mmu-miR-369-3p	ENSMUSG00000024304	Cdh2	-0.0882231	0.996652	0.217237	0.643052	0.479301	0.884751	NO
mmu-miR-34b-3p	ENSMUSG00000024331	Dsc2	-0.200166	0.996652	-0.236776	0.643843	-2.05237	0.19094	NO
mmu-miR-34b-3p	ENSMUSG00000044322	Dsc1	-0.290446	0.996652	-0.236776	0.643843	-2.05237	0.19094	NO
mmu-miR-338-3p	ENSMUSG00000034774	Dsg1c	0.402871	0.996652	0.807797	0.0377321	0.545226	0.240263	NO
mmu-miR-369-3p	ENSMUSG00000069441	Dsg1a	-0.130257	0.996652	0.217237	0.643052	0.479301	0.884751	NO
mmu-miR-532-5p	ENSMUSG00000061928	Dsg1b	-0.163983	0.998158	-0.0375693	0.883907	-2.41669	0.0677441	NO
mmu-miR-139-5p	ENSMUSG00000001804	Dsg4	NA	NA	-0.0705343	0.816628	-0.955541	0.548138	NO
mmu-miR-369-3p	ENSMUSG00000056632	Dsg3	-0.806479	0.996652	0.217237	0.643052	0.479301	0.884751	NO
mmu-miR-532-5p	ENSMUSG00000061808	Ttr	2.96787	0.644558	-0.0375693	0.883907	-2.41669	0.0677441	NO
mmu-miR-34b-3p	ENSMUSG00000069439	Gm8444	0.413777	0.996652	-0.236776	0.643843	-2.05237	0.19094	NO
mmu-miR-532-5p	ENSMUSG00000069439	Gm8444	0.413777	0.996652	-0.0375693	0.883907	-2.41669	0.0677441	NO
mmu-miR-423-3p	ENSMUSG00000041923	Nol4	-0.145905	0.79291	-0.606918	0.275113	-0.977902	0.338619	NO
mmu-miR-501-3p	ENSMUSG00000041923	Nol4	-0.145905	0.79291	0.31491	0.302354	0.783282	0.221205	NO
mmu-miR-409-5p	ENSMUSG00000041923	Nol4	-0.145905	0.79291	1.24524	0.0614095	-1.5346	0.619529	NO
mmu-miR-671-3p	ENSMUSG00000000420	Galnt1	-0.0136038	0.996652	-0.383537	0.273755	-1.14401	0.674049	NO
mmu-miR-673-5p	ENSMUSG00000024273	2700062C07Rik	0.0425747	0.996652	-0.264954	0.536775	-0.680037	0.0343531	NO
mmu-miR-151-3p	ENSMUSG00000024273	2700062C07Rik	0.0425747	0.996652	0.150024	0.579751	-0.191302	0.306068	NO
mmu-miR-151-5p	ENSMUSG00000024273	2700062C07Rik	0.0425747	0.996652	-0.0473167	0.801413	0.0282668	0.900961	NO
mmu-miR-666-3p	ENSMUSG00000024273	2700062C07Rik	0.0425747	0.996652	-0.157681	0.726433	-3.3675	0.194747	NO
mmu-miR-139-5p	ENSMUSG00000024270	Slc39a6	-0.0595159	0.996652	-0.0705343	0.816628	-0.955541	0.548138	NO
mmu-miR-369-3p	ENSMUSG00000039616	Mocos	0.0790355	0.996652	0.217237	0.643052	0.479301	0.884751	NO
mmu-miR-369-3p	ENSMUSG00000033632	AW554918	-0.074164	0.996652	0.217237	0.643052	0.479301	0.884751	NO
mmu-miR-331-3p	ENSMUSG00000033632	AW554918	-0.074164	0.996652	-2.04862	0.000874315	-1.512	0.0611883	NO
mmu-miR-342-3p	ENSMUSG00000033632	AW554918	-0.074164	0.996652	-0.153595	0.696257	-1.76212	0.42733	NO
mmu-miR-423-3p	ENSMUSG00000024268	Celf4	-0.0945867	0.996652	-0.606918	0.275113	-0.977902	0.338619	NO
mmu-miR-34b-3p	ENSMUSG00000046636	Gm7729	-0.0339453	0.998373	-0.236776	0.643843	-2.05237	0.19094	NO
mmu-miR-423-3p	ENSMUSG00000055771	Gm7936	0.0750158	0.997001	-0.606918	0.275113	-0.977902	0.338619	NO
mmu-miR-423-5p	ENSMUSG00000055771	Gm7936	0.0750158	0.997001	0.208863	0.685655	-1.52058	0.609909	NO
mmu-miR-369-3p	ENSMUSG00000055771	Gm7936	0.0750158	0.997001	0.217237	0.643052	0.479301	0.884751	NO
mmu-miR-369-3p	ENSMUSG00000057455	Rit2	-0.121669	0.996652	0.217237	0.643052	0.479301	0.884751	NO
mmu-miR-338-3p	ENSMUSG00000024258	Polr2d	-0.120914	0.996652	0.807797	0.0377321	0.545226	0.240263	NO
mmu-miR-342-3p	ENSMUSG00000024258	Polr2d	-0.120914	0.996652	-0.153595	0.696257	-1.76212	0.42733	NO
mmu-miR-151-5p	ENSMUSG00000024258	Polr2d	-0.120914	0.996652	-0.0473167	0.801413	0.0282668	0.900961	NO
mmu-miR-671-5p	ENSMUSG00000024258	Polr2d	-0.120914	0.996652	-0.658749	0.352425	-1.92348	0.54595	NO
mmu-miR-342-3p	ENSMUSG00000024400	Wdr33	-0.0337831	0.996652	-0.153595	0.696257	-1.76212	0.42733	NO
mmu-miR-501-3p	ENSMUSG00000024400	Wdr33	-0.0337831	0.996652	0.31491	0.302354	0.783282	0.221205	NO
mmu-miR-409-5p	ENSMUSG00000024400	Wdr33	-0.0337831	0.996652	1.24524	0.0614095	-1.5346	0.619529	NO
mmu-miR-139-3p	ENSMUSG00000024382	Ercc3	-0.0857683	0.996652	-0.176213	0.806923	-0.797117	0.298897	NO
mmu-miR-342-3p	ENSMUSG00000024382	Ercc3	-0.0857683	0.996652	-0.153595	0.696257	-1.76212	0.42733	NO
mmu-miR-423-3p	ENSMUSG00000024381	Bin1	-0.0367959	0.996652	-0.606918	0.275113	-0.977902	0.338619	NO
mmu-miR-331-3p	ENSMUSG00000024381	Bin1	-0.0367959	0.996652	-2.04862	0.000874315	-1.512	0.0611883	NO
mmu-miR-188-5p	ENSMUSG00000024379	Tslp	0.64729	0.996652	-2.20972	0.318876	-1.16385	0.646532	NO
mmu-miR-423-3p	ENSMUSG00000014504	Srp19	-0.0945318	0.996652	-0.606918	0.275113	-0.977902	0.338619	NO
mmu-miR-673-5p	ENSMUSG00000014504	Srp19	-0.0945318	0.996652	-0.264954	0.536775	-0.680037	0.0343531	NO
mmu-miR-501-3p	ENSMUSG00000012282	Wnt8a	0.596057	0.996652	0.31491	0.302354	0.783282	0.221205	NO
mmu-miR-671-3p	ENSMUSG00000012282	Wnt8a	0.596057	0.996652	-0.383537	0.273755	-1.14401	0.674049	NO
mmu-miR-331-3p	ENSMUSG00000012282	Wnt8a	0.596057	0.996652	-2.04862	0.000874315	-1.512	0.0611883	NO
mmu-miR-574-3p	ENSMUSG00000035984	Nme5	0.272719	0.996652	-1.00306	0.0201434	3.42572	0.263154	NO
mmu-miR-501-3p	ENSMUSG00000035984	Nme5	0.272719	0.996652	0.31491	0.302354	0.783282	0.221205	NO
mmu-miR-342-3p	ENSMUSG00000035984	Nme5	0.272719	0.996652	-0.153595	0.696257	-1.76212	0.42733	NO
mmu-miR-151-5p	ENSMUSG00000035984	Nme5	0.272719	0.996652	-0.0473167	0.801413	0.0282668	0.900961	NO
mmu-miR-673-5p	ENSMUSG00000024366	Gfra3	2.32635	0.996652	-0.264954	0.536775	-0.680037	0.0343531	NO
mmu-miR-139-3p	ENSMUSG00000038773	Kdm3b	-0.0547038	0.996652	-0.176213	0.806923	-0.797117	0.298897	NO
mmu-miR-188-5p	ENSMUSG00000038555	Reep2	-0.0944907	0.996652	-2.20972	0.318876	-1.16385	0.646532	NO
mmu-miR-666-3p	ENSMUSG00000038555	Reep2	-0.0944907	0.996652	-0.157681	0.726433	-3.3675	0.194747	NO
mmu-miR-423-3p	ENSMUSG00000024359	Hspa9	-0.125763	0.926047	-0.606918	0.275113	-0.977902	0.338619	NO
mmu-miR-338-3p	ENSMUSG00000024359	Hspa9	-0.125763	0.926047	0.807797	0.0377321	0.545226	0.240263	NO
mmu-miR-34b-3p	ENSMUSG00000024357	Sil1	0.0981385	0.996652	-0.236776	0.643843	-2.05237	0.19094	NO
mmu-miR-574-3p	ENSMUSG00000024357	Sil1	0.0981385	0.996652	-1.00306	0.0201434	3.42572	0.263154	NO
mmu-miR-331-3p	ENSMUSG00000024357	Sil1	0.0981385	0.996652	-2.04862	0.000874315	-1.512	0.0611883	NO
mmu-miR-671-3p	ENSMUSG00000024357	Sil1	0.0981385	0.996652	-0.383537	0.273755	-1.14401	0.674049	NO
mmu-miR-34b-3p	ENSMUSG00000062742	Gm5239	0.650517	0.996652	-0.236776	0.643843	-2.05237	0.19094	NO
mmu-miR-139-3p	ENSMUSG00000062742	Gm5239	0.650517	0.996652	-0.176213	0.806923	-0.797117	0.298897	NO
mmu-miR-139-5p	ENSMUSG00000062742	Gm5239	0.650517	0.996652	-0.0705343	0.816628	-0.955541	0.548138	NO
mmu-miR-501-3p	ENSMUSG00000037058	Paip2	0.0398919	0.996652	0.31491	0.302354	0.783282	0.221205	NO
mmu-miR-188-5p	ENSMUSG00000073600	Prob1	0.0561732	0.996652	-2.20972	0.318876	-1.16385	0.646532	NO
mmu-miR-151-3p	ENSMUSG00000073600	Prob1	0.0561732	0.996652	0.150024	0.579751	-0.191302	0.306068	NO
mmu-miR-34b-3p	ENSMUSG00000024350	Dnajc18	-0.0931736	0.996652	-0.236776	0.643843	-2.05237	0.19094	NO
mmu-miR-342-3p	ENSMUSG00000024350	Dnajc18	-0.0931736	0.996652	-0.153595	0.696257	-1.76212	0.42733	NO
mmu-miR-666-3p	ENSMUSG00000024350	Dnajc18	-0.0931736	0.996652	-0.157681	0.726433	-3.3675	0.194747	NO
mmu-miR-342-3p	ENSMUSG00000073598	Smim33	-0.55279	0.996652	-0.153595	0.696257	-1.76212	0.42733	NO
mmu-miR-671-5p	ENSMUSG00000073598	Smim33	-0.55279	0.996652	-0.658749	0.352425	-1.92348	0.54595	NO
mmu-miR-188-5p	ENSMUSG00000046668	Cxxc5	-0.13278	0.996652	-2.20972	0.318876	-1.16385	0.646532	NO
mmu-miR-331-3p	ENSMUSG00000046668	Cxxc5	-0.13278	0.996652	-2.04862	0.000874315	-1.512	0.0611883	NO
mmu-miR-34b-3p	ENSMUSG00000046727	Cystm1	-0.00433986	0.99841	-0.236776	0.643843	-2.05237	0.19094	NO
mmu-miR-532-5p	ENSMUSG00000046727	Cystm1	-0.00433986	0.99841	-0.0375693	0.883907	-2.41669	0.0677441	NO
mmu-miR-423-5p	ENSMUSG00000024346	Pfdn1	-0.148019	0.996652	0.208863	0.685655	-1.52058	0.609909	NO
mmu-miR-671-5p	ENSMUSG00000024486	Hbegf	0.0507353	0.996652	-0.658749	0.352425	-1.92348	0.54595	NO
mmu-miR-666-3p	ENSMUSG00000024485	Slc4a9	0.672806	0.996652	-0.157681	0.726433	-3.3675	0.194747	NO
mmu-miR-409-5p	ENSMUSG00000024483	Ankhd1	-0.0234093	0.996652	1.24524	0.0614095	-1.5346	0.619529	NO
mmu-miR-532-5p	ENSMUSG00000090264	Eif4ebp3	0.540885	0.996652	-0.0375693	0.883907	-2.41669	0.0677441	NO
mmu-miR-671-5p	ENSMUSG00000090264	Eif4ebp3	0.540885	0.996652	-0.658749	0.352425	-1.92348	0.54595	NO
mmu-miR-423-5p	ENSMUSG00000117679	Apbb3	0.0581301	0.996652	0.208863	0.685655	-1.52058	0.609909	NO
mmu-miR-139-5p	ENSMUSG00000117679	Apbb3	0.0581301	0.996652	-0.0705343	0.816628	-0.955541	0.548138	NO
mmu-miR-151-3p	ENSMUSG00000033272	Slc35a4	-0.161754	0.996652	0.150024	0.579751	-0.191302	0.306068	NO
mmu-miR-151-5p	ENSMUSG00000051439	Cd14	-0.232996	0.996652	-0.0473167	0.801413	0.0282668	0.900961	NO
mmu-miR-574-3p	ENSMUSG00000006850	Tmco6	-0.042647	0.996652	-1.00306	0.0201434	3.42572	0.263154	NO
mmu-miR-423-5p	ENSMUSG00000006850	Tmco6	-0.042647	0.996652	0.208863	0.685655	-1.52058	0.609909	NO
mmu-miR-342-3p	ENSMUSG00000014294	Ndufa2	-0.163734	0.996652	-0.153595	0.696257	-1.76212	0.42733	NO
mmu-miR-338-3p	ENSMUSG00000042660	Wdr55	-0.152579	0.996652	0.807797	0.0377321	0.545226	0.240263	NO
mmu-miR-369-5p	ENSMUSG00000042660	Wdr55	-0.152579	0.996652	-0.0348029	0.908875	-0.633128	0.521823	NO
mmu-miR-673-5p	ENSMUSG00000044595	Dnd1	0.178012	0.996652	-0.264954	0.536775	-0.680037	0.0343531	NO
mmu-miR-671-3p	ENSMUSG00000044595	Dnd1	0.178012	0.996652	-0.383537	0.273755	-1.14401	0.674049	NO
mmu-miR-369-5p	ENSMUSG00000001380	Hars1	-0.113616	0.996652	-0.0348029	0.908875	-0.633128	0.521823	NO
mmu-miR-342-3p	ENSMUSG00000001383	Zmat2	-0.128339	0.984872	-0.153595	0.696257	-1.76212	0.42733	NO
mmu-miR-423-3p	ENSMUSG00000051599	Pcdhb2	-0.215643	0.996652	-0.606918	0.275113	-0.977902	0.338619	NO
mmu-miR-532-5p	ENSMUSG00000045498	Pcdhb3	0.0302748	0.996652	-0.0375693	0.883907	-2.41669	0.0677441	NO
mmu-miR-34b-3p	ENSMUSG00000044043	Pcdhb14	-0.0330737	0.996652	-0.236776	0.643843	-2.05237	0.19094	NO
mmu-miR-369-5p	ENSMUSG00000044022	Pcdhb21	0.0148776	0.996652	-0.0348029	0.908875	-0.633128	0.521823	NO
mmu-miR-369-5p	ENSMUSG00000050304	Slc25a2	0.34064	0.996652	-0.0348029	0.908875	-0.633128	0.521823	NO
mmu-miR-188-5p	ENSMUSG00000024456	Diaph1	-0.0477199	0.996652	-2.20972	0.318876	-1.16385	0.646532	NO
mmu-miR-423-5p	ENSMUSG00000024454	Hdac3	-0.0837044	0.996652	0.208863	0.685655	-1.52058	0.609909	NO
mmu-miR-423-5p	ENSMUSG00000044024	Rell2	-0.129126	0.996652	0.208863	0.685655	-1.52058	0.609909	NO
mmu-miR-151-3p	ENSMUSG00000044024	Rell2	-0.129126	0.996652	0.150024	0.579751	-0.191302	0.306068	NO
mmu-miR-331-3p	ENSMUSG00000044024	Rell2	-0.129126	0.996652	-2.04862	0.000874315	-1.512	0.0611883	NO
mmu-miR-139-5p	ENSMUSG00000044024	Rell2	-0.129126	0.996652	-0.0705343	0.816628	-0.955541	0.548138	NO
mmu-miR-369-3p	ENSMUSG00000051375	Pcdh1	-0.0650077	0.996652	0.217237	0.643052	0.479301	0.884751	NO
mmu-miR-151-3p	ENSMUSG00000024442	Dele1	0.00581555	0.99841	0.150024	0.579751	-0.191302	0.306068	NO
mmu-miR-369-3p	ENSMUSG00000024425	Ndfip1	-0.107688	0.995207	0.217237	0.643052	0.479301	0.884751	NO
mmu-miR-501-3p	ENSMUSG00000024431	Nr3c1	-0.145614	0.938646	0.31491	0.302354	0.783282	0.221205	NO
mmu-miR-139-3p	ENSMUSG00000051401	Kctd16	0.00777314	0.99768	-0.176213	0.806923	-0.797117	0.298897	NO
mmu-miR-574-3p	ENSMUSG00000051401	Kctd16	0.00777314	0.99768	-1.00306	0.0201434	3.42572	0.263154	NO
mmu-miR-369-3p	ENSMUSG00000096699	Rps19-ps4	0.55981	0.996652	0.217237	0.643052	0.479301	0.884751	NO
mmu-miR-151-5p	ENSMUSG00000096699	Rps19-ps4	0.55981	0.996652	-0.0473167	0.801413	0.0282668	0.900961	NO
mmu-miR-423-5p	ENSMUSG00000073574	Grxcr2	-2.47604	0.88636	0.208863	0.685655	-1.52058	0.609909	NO
mmu-miR-666-3p	ENSMUSG00000073574	Grxcr2	-2.47604	0.88636	-0.157681	0.726433	-3.3675	0.194747	NO
mmu-miR-574-3p	ENSMUSG00000034339	Cstdc7	NA	NA	-1.00306	0.0201434	3.42572	0.263154	NO
mmu-miR-338-3p	ENSMUSG00000024491	Rbm27	-0.0987872	0.996652	0.807797	0.0377321	0.545226	0.240263	NO
mmu-miR-666-3p	ENSMUSG00000024497	Pou4f3	NA	NA	-0.157681	0.726433	-3.3675	0.194747	NO
mmu-miR-34b-3p	ENSMUSG00000024498	Tcerg1	-0.0672957	0.996652	-0.236776	0.643843	-2.05237	0.19094	NO
mmu-miR-423-3p	ENSMUSG00000042816	Gpr151	-0.0706085	0.996652	-0.606918	0.275113	-0.977902	0.338619	NO
mmu-miR-671-5p	ENSMUSG00000024500	Ppp2r2b	-0.122744	0.996652	-0.658749	0.352425	-1.92348	0.54595	NO
mmu-miR-342-3p	ENSMUSG00000048188	Gm8181	0.0352673	0.99841	-0.153595	0.696257	-1.76212	0.42733	NO
mmu-miR-34b-3p	ENSMUSG00000024502	Jakmip2	-0.0151466	0.996652	-0.236776	0.643843	-2.05237	0.19094	NO
mmu-miR-409-5p	ENSMUSG00000071858	Gm94	NA	NA	1.24524	0.0614095	-1.5346	0.619529	NO
mmu-miR-671-5p	ENSMUSG00000071858	Gm94	NA	NA	-0.658749	0.352425	-1.92348	0.54595	NO
mmu-miR-532-5p	ENSMUSG00000055561	Spink5	-1.41705	0.996652	-0.0375693	0.883907	-2.41669	0.0677441	NO
mmu-miR-369-3p	ENSMUSG00000055561	Spink5	-1.41705	0.996652	0.217237	0.643052	0.479301	0.884751	NO
mmu-miR-139-3p	ENSMUSG00000024472	Dcp2	-0.120397	0.958458	-0.176213	0.806923	-0.797117	0.298897	NO
mmu-miR-139-5p	ENSMUSG00000024472	Dcp2	-0.120397	0.958458	-0.0705343	0.816628	-0.955541	0.548138	NO
mmu-miR-342-3p	ENSMUSG00000024472	Dcp2	-0.120397	0.958458	-0.153595	0.696257	-1.76212	0.42733	NO
mmu-miR-139-3p	ENSMUSG00000071856	Mcc	-0.0635213	0.996652	-0.176213	0.806923	-0.797117	0.298897	NO
mmu-miR-139-5p	ENSMUSG00000071856	Mcc	-0.0635213	0.996652	-0.0705343	0.816628	-0.955541	0.548138	NO
mmu-miR-34b-3p	ENSMUSG00000024477	Pggt1b	0.00550617	0.99841	-0.236776	0.643843	-2.05237	0.19094	NO
mmu-miR-34b-3p	ENSMUSG00000071855	Ccdc112	0.00749988	0.998158	-0.236776	0.643843	-2.05237	0.19094	NO
mmu-miR-423-5p	ENSMUSG00000033022	Cdo1	0.0646136	0.996652	0.208863	0.685655	-1.52058	0.609909	NO
mmu-miR-532-5p	ENSMUSG00000032905	Atg12	0.0196572	0.996652	-0.0375693	0.883907	-2.41669	0.0677441	NO
mmu-miR-532-5p	ENSMUSG00000024480	Ap3s1	-0.0258197	0.996652	-0.0375693	0.883907	-2.41669	0.0677441	NO
mmu-miR-34b-3p	ENSMUSG00000024481	Lvrn	0.750512	0.996652	-0.236776	0.643843	-2.05237	0.19094	NO
mmu-miR-342-3p	ENSMUSG00000073568	Arl14epl	2.21191	0.996652	-0.153595	0.696257	-1.76212	0.42733	NO
mmu-miR-139-3p	ENSMUSG00000019647	Sema6a	0.0113312	0.996652	-0.176213	0.806923	-0.797117	0.298897	NO
mmu-miR-369-5p	ENSMUSG00000024510	Ftmt	NA	NA	-0.0348029	0.908875	-0.633128	0.521823	NO
mmu-miR-671-5p	ENSMUSG00000024510	Ftmt	NA	NA	-0.658749	0.352425	-1.92348	0.54595	NO
mmu-miR-139-5p	ENSMUSG00000024528	Srfbp1	-0.0382544	0.996652	-0.0705343	0.816628	-0.955541	0.548138	NO
mmu-miR-139-5p	ENSMUSG00000024529	Lox	0.279067	0.996652	-0.0705343	0.816628	-0.955541	0.548138	NO
mmu-miR-673-5p	ENSMUSG00000053624	Gykl1	2.51131	0.996652	-0.264954	0.536775	-0.680037	0.0343531	NO
mmu-miR-423-5p	ENSMUSG00000053624	Gykl1	2.51131	0.996652	0.208863	0.685655	-1.52058	0.609909	NO
mmu-miR-409-5p	ENSMUSG00000053624	Gykl1	2.51131	0.996652	1.24524	0.0614095	-1.5346	0.619529	NO
mmu-miR-139-5p	ENSMUSG00000024534	Sncaip	0.0687202	0.996652	-0.0705343	0.816628	-0.955541	0.548138	NO
mmu-miR-666-3p	ENSMUSG00000024534	Sncaip	0.0687202	0.996652	-0.157681	0.726433	-3.3675	0.194747	NO
mmu-miR-139-5p	ENSMUSG00000034484	Snx2	-0.018594	0.996652	-0.0705343	0.816628	-0.955541	0.548138	NO
mmu-miR-369-3p	ENSMUSG00000024535	Snx24	-0.0686252	0.996652	0.217237	0.643052	0.479301	0.884751	NO
mmu-miR-331-3p	ENSMUSG00000024535	Snx24	-0.0686252	0.996652	-2.04862	0.000874315	-1.512	0.0611883	NO
mmu-miR-337-5p	ENSMUSG00000053644	Aldh7a1	0.118291	0.996652	-0.0408363	0.833174	-1.33065	0.709559	NO
mmu-miR-139-3p	ENSMUSG00000008301	Phax	-0.0724549	0.996652	-0.176213	0.806923	-0.797117	0.298897	NO
mmu-miR-673-5p	ENSMUSG00000008301	Phax	-0.0724549	0.996652	-0.264954	0.536775	-0.680037	0.0343531	NO
mmu-miR-337-5p	ENSMUSG00000008301	Phax	-0.0724549	0.996652	-0.0408363	0.833174	-1.33065	0.709559	NO
mmu-miR-342-3p	ENSMUSG00000008301	Phax	-0.0724549	0.996652	-0.153595	0.696257	-1.76212	0.42733	NO
mmu-miR-151-3p	ENSMUSG00000032900	Spmip10	0.068943	0.996652	0.150024	0.579751	-0.191302	0.306068	NO
mmu-miR-369-5p	ENSMUSG00000024590	Lmnb1	-0.11215	0.996652	-0.0348029	0.908875	-0.633128	0.521823	NO
mmu-miR-296-5p	ENSMUSG00000024590	Lmnb1	-0.11215	0.996652	-1.3928	0.000171955	-3.00266	0.0124473	NO
mmu-miR-139-5p	ENSMUSG00000024592	C330018D20Rik	0.00781625	0.99841	-0.0705343	0.816628	-0.955541	0.548138	NO
mmu-miR-188-5p	ENSMUSG00000024592	C330018D20Rik	0.00781625	0.99841	-2.20972	0.318876	-1.16385	0.646532	NO
mmu-miR-671-5p	ENSMUSG00000024594	Prrc1	0.0640008	0.996652	-0.658749	0.352425	-1.92348	0.54595	NO
mmu-miR-151-5p	ENSMUSG00000024600	Slc27a6	-0.298438	0.996652	-0.0473167	0.801413	0.0282668	0.900961	NO
mmu-miR-666-3p	ENSMUSG00000024600	Slc27a6	-0.298438	0.996652	-0.157681	0.726433	-3.3675	0.194747	NO
mmu-miR-139-3p	ENSMUSG00000024601	Isoc1	-0.0826151	0.996652	-0.176213	0.806923	-0.797117	0.298897	NO
mmu-miR-369-3p	ENSMUSG00000053441	Adamts19	-0.660589	0.996652	0.217237	0.643052	0.479301	0.884751	NO
mmu-miR-574-3p	ENSMUSG00000050875	Minar2	-0.0589702	0.996652	-1.00306	0.0201434	3.42572	0.263154	NO
mmu-miR-151-5p	ENSMUSG00000068606	Gm4841	-0.825277	0.996652	-0.0473167	0.801413	0.0282668	0.900961	NO
mmu-miR-423-3p	ENSMUSG00000038059	Smim3	0.0728633	0.996652	-0.606918	0.275113	-0.977902	0.338619	NO
mmu-miR-423-5p	ENSMUSG00000038059	Smim3	0.0728633	0.996652	0.208863	0.685655	-1.52058	0.609909	NO
mmu-miR-139-5p	ENSMUSG00000024604	Rbm22	-0.0978322	0.996652	-0.0705343	0.816628	-0.955541	0.548138	NO
mmu-miR-409-5p	ENSMUSG00000024608	Rps14	-0.137499	0.996652	1.24524	0.0614095	-1.5346	0.619529	NO
mmu-miR-139-3p	ENSMUSG00000024610	Cd74	0.573736	0.931146	-0.176213	0.806923	-0.797117	0.298897	NO
mmu-miR-188-5p	ENSMUSG00000024610	Cd74	0.573736	0.931146	-2.20972	0.318876	-1.16385	0.646532	NO
mmu-miR-296-5p	ENSMUSG00000024610	Cd74	0.573736	0.931146	-1.3928	0.000171955	-3.00266	0.0124473	NO
mmu-miR-673-5p	ENSMUSG00000036412	Arsi	-0.0402744	0.996652	-0.264954	0.536775	-0.680037	0.0343531	NO
mmu-miR-501-3p	ENSMUSG00000024617	Camk2a	-0.0641794	0.996652	0.31491	0.302354	0.783282	0.221205	NO
mmu-miR-139-5p	ENSMUSG00000052026	Slc6a7	-0.10337	0.996652	-0.0705343	0.816628	-0.955541	0.548138	NO
mmu-miR-337-5p	ENSMUSG00000052026	Slc6a7	-0.10337	0.996652	-0.0408363	0.833174	-1.33065	0.709559	NO
mmu-miR-188-5p	ENSMUSG00000052026	Slc6a7	-0.10337	0.996652	-2.20972	0.318876	-1.16385	0.646532	NO
mmu-miR-423-3p	ENSMUSG00000024620	Pdgfrb	-0.0678819	0.996652	-0.606918	0.275113	-0.977902	0.338619	NO
mmu-miR-423-3p	ENSMUSG00000024621	Csf1r	-0.0320594	0.996652	-0.606918	0.275113	-0.977902	0.338619	NO
mmu-miR-151-5p	ENSMUSG00000024621	Csf1r	-0.0320594	0.996652	-0.0473167	0.801413	0.0282668	0.900961	NO
mmu-miR-673-5p	ENSMUSG00000024575	Pde6a	0.0440677	0.996652	-0.264954	0.536775	-0.680037	0.0343531	NO
mmu-miR-151-3p	ENSMUSG00000024575	Pde6a	0.0440677	0.996652	0.150024	0.579751	-0.191302	0.306068	NO
mmu-miR-139-3p	ENSMUSG00000033871	Ppargc1b	-0.0599774	0.996652	-0.176213	0.806923	-0.797117	0.298897	NO
mmu-miR-423-5p	ENSMUSG00000033871	Ppargc1b	-0.0599774	0.996652	0.208863	0.685655	-1.52058	0.609909	NO
mmu-miR-337-5p	ENSMUSG00000033871	Ppargc1b	-0.0599774	0.996652	-0.0408363	0.833174	-1.33065	0.709559	NO
mmu-miR-337-5p	ENSMUSG00000024578	Il17b	-0.390029	0.996652	-0.0408363	0.833174	-1.33065	0.709559	NO
mmu-miR-331-3p	ENSMUSG00000024579	Pcyox1l	0.0734638	0.996652	-2.04862	0.000874315	-1.512	0.0611883	NO
mmu-miR-369-5p	ENSMUSG00000024579	Pcyox1l	0.0734638	0.996652	-0.0348029	0.908875	-0.633128	0.521823	NO
mmu-miR-671-5p	ENSMUSG00000024579	Pcyox1l	0.0734638	0.996652	-0.658749	0.352425	-1.92348	0.54595	NO
mmu-miR-671-3p	ENSMUSG00000032735	Ablim3	0.0652378	0.996652	-0.383537	0.273755	-1.14401	0.674049	NO
mmu-miR-151-5p	ENSMUSG00000032735	Ablim3	0.0652378	0.996652	-0.0473167	0.801413	0.0282668	0.900961	NO
mmu-miR-331-3p	ENSMUSG00000045629	Sh3tc2	-0.0977212	0.996652	-2.04862	0.000874315	-1.512	0.0611883	NO
mmu-miR-188-5p	ENSMUSG00000118370	Gm41750	-1.91115	0.996652	-2.20972	0.318876	-1.16385	0.646532	NO
mmu-miR-532-5p	ENSMUSG00000118370	Gm41750	-1.91115	0.996652	-0.0375693	0.883907	-2.41669	0.0677441	NO
mmu-miR-423-3p	ENSMUSG00000042211	Fbxo38	-0.0140736	0.996652	-0.606918	0.275113	-0.977902	0.338619	NO
mmu-miR-423-5p	ENSMUSG00000042211	Fbxo38	-0.0140736	0.996652	0.208863	0.685655	-1.52058	0.609909	NO
mmu-miR-151-3p	ENSMUSG00000042211	Fbxo38	-0.0140736	0.996652	0.150024	0.579751	-0.191302	0.306068	NO
mmu-miR-409-5p	ENSMUSG00000044176	Spink10	0.120822	0.996652	1.24524	0.0614095	-1.5346	0.619529	NO
mmu-miR-671-3p	ENSMUSG00000041482	Piezo2	0.247434	0.996652	-0.383537	0.273755	-1.14401	0.674049	NO
mmu-miR-574-3p	ENSMUSG00000024583	Txnl1	-0.0914961	0.996652	-1.00306	0.0201434	3.42572	0.263154	NO
mmu-miR-574-3p	ENSMUSG00000056812	St8sia3	-0.067602	0.996652	-1.00306	0.0201434	3.42572	0.263154	NO
mmu-miR-501-3p	ENSMUSG00000056812	St8sia3	-0.067602	0.996652	0.31491	0.302354	0.783282	0.221205	NO
mmu-miR-671-3p	ENSMUSG00000024589	Nedd4l	-0.00407558	0.99841	-0.383537	0.273755	-1.14401	0.674049	NO
mmu-miR-338-3p	ENSMUSG00000032845	Alpk2	-0.0647998	0.998158	0.807797	0.0377321	0.545226	0.240263	NO
mmu-miR-666-3p	ENSMUSG00000032845	Alpk2	-0.0647998	0.998158	-0.157681	0.726433	-3.3675	0.194747	NO
mmu-miR-151-5p	ENSMUSG00000024517	Grp	-0.231043	0.996652	-0.0473167	0.801413	0.0282668	0.900961	NO
mmu-miR-369-5p	ENSMUSG00000024519	Cplx4	2.32635	0.996652	-0.0348029	0.908875	-0.633128	0.521823	NO
mmu-miR-532-5p	ENSMUSG00000024524	Gnal	-0.00926776	0.996652	-0.0375693	0.883907	-2.41669	0.0677441	NO
mmu-miR-34b-3p	ENSMUSG00000062526	Mppe1	-0.0517353	0.996652	-0.236776	0.643843	-2.05237	0.19094	NO
mmu-miR-338-3p	ENSMUSG00000062526	Mppe1	-0.0517353	0.996652	0.807797	0.0377321	0.545226	0.240263	NO
mmu-miR-501-3p	ENSMUSG00000024525	Impa2	0.0379023	0.996652	0.31491	0.302354	0.783282	0.221205	NO
mmu-miR-188-5p	ENSMUSG00000024525	Impa2	0.0379023	0.996652	-2.20972	0.318876	-1.16385	0.646532	NO
mmu-miR-151-3p	ENSMUSG00000024525	Impa2	0.0379023	0.996652	0.150024	0.579751	-0.191302	0.306068	NO
mmu-miR-188-5p	ENSMUSG00000024526	Cidea	-0.14399	0.996652	-2.20972	0.318876	-1.16385	0.646532	NO
mmu-miR-331-3p	ENSMUSG00000024526	Cidea	-0.14399	0.996652	-2.04862	0.000874315	-1.512	0.0611883	NO
mmu-miR-296-5p	ENSMUSG00000024526	Cidea	-0.14399	0.996652	-1.3928	0.000171955	-3.00266	0.0124473	NO
mmu-miR-423-3p	ENSMUSG00000001473	Tubb6	0.0793751	0.996652	-0.606918	0.275113	-0.977902	0.338619	NO
mmu-miR-423-5p	ENSMUSG00000001473	Tubb6	0.0793751	0.996652	0.208863	0.685655	-1.52058	0.609909	NO
mmu-miR-151-3p	ENSMUSG00000001473	Tubb6	0.0793751	0.996652	0.150024	0.579751	-0.191302	0.306068	NO
mmu-miR-673-5p	ENSMUSG00000024527	Afg3l2	-0.0264639	0.996652	-0.264954	0.536775	-0.680037	0.0343531	NO
mmu-miR-188-5p	ENSMUSG00000024527	Afg3l2	-0.0264639	0.996652	-2.20972	0.318876	-1.16385	0.646532	NO
mmu-miR-369-3p	ENSMUSG00000024527	Afg3l2	-0.0264639	0.996652	0.217237	0.643052	0.479301	0.884751	NO
mmu-miR-671-3p	ENSMUSG00000024527	Afg3l2	-0.0264639	0.996652	-0.383537	0.273755	-1.14401	0.674049	NO
mmu-miR-151-3p	ENSMUSG00000024527	Afg3l2	-0.0264639	0.996652	0.150024	0.579751	-0.191302	0.306068	NO
mmu-miR-671-5p	ENSMUSG00000024527	Afg3l2	-0.0264639	0.996652	-0.658749	0.352425	-1.92348	0.54595	NO
mmu-miR-666-3p	ENSMUSG00000024527	Afg3l2	-0.0264639	0.996652	-0.157681	0.726433	-3.3675	0.194747	NO
mmu-miR-342-3p	ENSMUSG00000024530	Prelid3a	0.0465084	0.996652	-0.153595	0.696257	-1.76212	0.42733	NO
mmu-miR-501-3p	ENSMUSG00000024539	Ptpn2	0.0581965	0.996652	0.31491	0.302354	0.783282	0.221205	NO
mmu-miR-188-5p	ENSMUSG00000024539	Ptpn2	0.0581965	0.996652	-2.20972	0.318876	-1.16385	0.646532	NO
mmu-miR-501-3p	ENSMUSG00000024542	Cep192	0.143843	0.996652	0.31491	0.302354	0.783282	0.221205	NO
mmu-miR-337-5p	ENSMUSG00000024542	Cep192	0.143843	0.996652	-0.0408363	0.833174	-1.33065	0.709559	NO
mmu-miR-673-5p	ENSMUSG00000009535	Rnmt	-0.137168	0.915501	-0.264954	0.536775	-0.680037	0.0343531	NO
mmu-miR-532-5p	ENSMUSG00000009535	Rnmt	-0.137168	0.915501	-0.0375693	0.883907	-2.41669	0.0677441	NO
mmu-miR-342-3p	ENSMUSG00000009535	Rnmt	-0.137168	0.915501	-0.153595	0.696257	-1.76212	0.42733	NO
mmu-miR-409-5p	ENSMUSG00000045569	Mc2r	NA	NA	1.24524	0.0614095	-1.5346	0.619529	NO
mmu-miR-34b-3p	ENSMUSG00000024546	4930546C10Rik	1.66043	0.996652	-0.236776	0.643843	-2.05237	0.19094	NO
mmu-miR-369-3p	ENSMUSG00000024512	Dynap	1.74035	0.996652	0.217237	0.643052	0.479301	0.884751	NO
mmu-miR-423-3p	ENSMUSG00000044906	4930503L19Rik	0.0749999	0.996652	-0.606918	0.275113	-0.977902	0.338619	NO
mmu-miR-501-3p	ENSMUSG00000024513	Mbd2	0.0536762	0.996652	0.31491	0.302354	0.783282	0.221205	NO
mmu-miR-409-5p	ENSMUSG00000024513	Mbd2	0.0536762	0.996652	1.24524	0.0614095	-1.5346	0.619529	NO
mmu-miR-151-3p	ENSMUSG00000024513	Mbd2	0.0536762	0.996652	0.150024	0.579751	-0.191302	0.306068	NO
mmu-miR-188-5p	ENSMUSG00000037253	Mex3c	-0.0239885	0.996652	-2.20972	0.318876	-1.16385	0.646532	NO
mmu-miR-409-5p	ENSMUSG00000037253	Mex3c	-0.0239885	0.996652	1.24524	0.0614095	-1.5346	0.619529	NO
mmu-miR-338-3p	ENSMUSG00000024556	Me2	0.00299629	0.99841	0.807797	0.0377321	0.545226	0.240263	NO
mmu-miR-423-3p	ENSMUSG00000024558	Mapk4	-0.136726	0.989841	-0.606918	0.275113	-0.977902	0.338619	NO
mmu-miR-671-5p	ENSMUSG00000024560	Cxxc1	-0.079596	0.996652	-0.658749	0.352425	-1.92348	0.54595	NO
mmu-miR-666-3p	ENSMUSG00000025885	Myo5b	0.0292901	0.996652	-0.157681	0.726433	-3.3675	0.194747	NO
mmu-miR-501-3p	ENSMUSG00000036299	BC031181	-0.0998114	0.996652	0.31491	0.302354	0.783282	0.221205	NO
mmu-miR-337-5p	ENSMUSG00000036299	BC031181	-0.0998114	0.996652	-0.0408363	0.833174	-1.33065	0.709559	NO
mmu-miR-342-3p	ENSMUSG00000036299	BC031181	-0.0998114	0.996652	-0.153595	0.696257	-1.76212	0.42733	NO
mmu-miR-337-5p	ENSMUSG00000035765	Dym	0.0312725	0.996652	-0.0408363	0.833174	-1.33065	0.709559	NO
mmu-miR-369-3p	ENSMUSG00000025880	Smad7	-0.0778452	0.996652	0.217237	0.643052	0.479301	0.884751	NO
mmu-miR-423-5p	ENSMUSG00000024563	Smad2	-0.157572	0.838199	0.208863	0.685655	-1.52058	0.609909	NO
mmu-miR-337-5p	ENSMUSG00000024563	Smad2	-0.157572	0.838199	-0.0408363	0.833174	-1.33065	0.709559	NO
mmu-miR-369-3p	ENSMUSG00000025421	Hdhd2	-0.116076	0.996652	0.217237	0.643052	0.479301	0.884751	NO
mmu-miR-501-3p	ENSMUSG00000073532	Gm7276	-0.260534	0.996652	0.31491	0.302354	0.783282	0.221205	NO
mmu-miR-337-5p	ENSMUSG00000073532	Gm7276	-0.260534	0.996652	-0.0408363	0.833174	-1.33065	0.709559	NO
mmu-miR-574-3p	ENSMUSG00000025425	St8sia5	-0.100612	0.996652	-1.00306	0.0201434	3.42572	0.263154	NO
mmu-miR-342-3p	ENSMUSG00000025425	St8sia5	-0.100612	0.996652	-0.153595	0.696257	-1.76212	0.42733	NO
mmu-miR-673-5p	ENSMUSG00000032818	Loxhd1	0.807193	0.996652	-0.264954	0.536775	-0.680037	0.0343531	NO
mmu-miR-139-3p	ENSMUSG00000041840	Haus1	0.0435024	0.996652	-0.176213	0.806923	-0.797117	0.298897	NO
mmu-miR-331-3p	ENSMUSG00000041840	Haus1	0.0435024	0.996652	-2.04862	0.000874315	-1.512	0.0611883	NO
mmu-miR-342-3p	ENSMUSG00000025428	Atp5f1a	-0.106036	0.996652	-0.153595	0.696257	-1.76212	0.42733	NO
mmu-miR-337-5p	ENSMUSG00000024571	Naa12	-0.213975	0.5058	-0.0408363	0.833174	-1.33065	0.709559	NO
mmu-miR-671-5p	ENSMUSG00000024571	Naa12	-0.213975	0.5058	-0.658749	0.352425	-1.92348	0.54595	NO
mmu-miR-151-5p	ENSMUSG00000034006	Slc66a2	0.0801547	0.996652	-0.0473167	0.801413	0.0282668	0.900961	NO
mmu-miR-574-3p	ENSMUSG00000033323	Ctdp1	-0.0331947	0.996652	-1.00306	0.0201434	3.42572	0.263154	NO
mmu-miR-342-3p	ENSMUSG00000033323	Ctdp1	-0.0331947	0.996652	-0.153595	0.696257	-1.76212	0.42733	NO
mmu-miR-666-3p	ENSMUSG00000033323	Ctdp1	-0.0331947	0.996652	-0.157681	0.726433	-3.3675	0.194747	NO
mmu-miR-369-5p	ENSMUSG00000033016	Nfatc1	0.0862	0.996652	-0.0348029	0.908875	-0.633128	0.521823	NO
mmu-miR-151-5p	ENSMUSG00000033016	Nfatc1	0.0862	0.996652	-0.0473167	0.801413	0.0282668	0.900961	NO
mmu-miR-666-3p	ENSMUSG00000033016	Nfatc1	0.0862	0.996652	-0.157681	0.726433	-3.3675	0.194747	NO
mmu-miR-34b-3p	ENSMUSG00000024553	Galr1	-0.566362	0.996652	-0.236776	0.643843	-2.05237	0.19094	NO
mmu-miR-671-3p	ENSMUSG00000024553	Galr1	-0.566362	0.996652	-0.383537	0.273755	-1.14401	0.674049	NO
mmu-miR-151-3p	ENSMUSG00000024553	Galr1	-0.566362	0.996652	0.150024	0.579751	-0.191302	0.306068	NO
mmu-miR-151-5p	ENSMUSG00000058881	Zfp516	0.0526861	0.996652	-0.0473167	0.801413	0.0282668	0.900961	NO
mmu-miR-296-5p	ENSMUSG00000058881	Zfp516	0.0526861	0.996652	-1.3928	0.000171955	-3.00266	0.0124473	NO
mmu-miR-423-5p	ENSMUSG00000046982	Tshz1	0.0478367	0.996652	0.208863	0.685655	-1.52058	0.609909	NO
mmu-miR-369-3p	ENSMUSG00000049090	Ptgr3	0.0527871	0.996652	0.217237	0.643052	0.479301	0.884751	NO
mmu-miR-409-5p	ENSMUSG00000056162	Cndp1	1.6585	0.367748	1.24524	0.0614095	-1.5346	0.619529	NO
mmu-miR-337-5p	ENSMUSG00000024644	Cndp2	-0.0423037	0.996652	-0.0408363	0.833174	-1.33065	0.709559	NO
mmu-miR-666-3p	ENSMUSG00000024644	Cndp2	-0.0423037	0.996652	-0.157681	0.726433	-3.3675	0.194747	NO
mmu-miR-574-3p	ENSMUSG00000024645	Timm21	0.0497603	0.996652	-1.00306	0.0201434	3.42572	0.263154	NO
mmu-miR-342-3p	ENSMUSG00000024645	Timm21	0.0497603	0.996652	-0.153595	0.696257	-1.76212	0.42733	NO
mmu-miR-369-3p	ENSMUSG00000050321	Neto1	0.0363262	0.996652	0.217237	0.643052	0.479301	0.884751	NO
mmu-miR-409-5p	ENSMUSG00000024647	Cbln2	-0.549033	0.0577966	1.24524	0.0614095	-1.5346	0.619529	NO
mmu-miR-342-3p	ENSMUSG00000056153	Socs6	-0.10885	0.996652	-0.153595	0.696257	-1.76212	0.42733	NO
mmu-miR-337-5p	ENSMUSG00000023066	Rttn	0.157744	0.996652	-0.0408363	0.833174	-1.33065	0.709559	NO
mmu-miR-409-5p	ENSMUSG00000023066	Rttn	0.157744	0.996652	1.24524	0.0614095	-1.5346	0.619529	NO
mmu-miR-671-3p	ENSMUSG00000023066	Rttn	0.157744	0.996652	-0.383537	0.273755	-1.14401	0.674049	NO
mmu-miR-666-3p	ENSMUSG00000023066	Rttn	0.157744	0.996652	-0.157681	0.726433	-3.3675	0.194747	NO
mmu-miR-671-3p	ENSMUSG00000001376	Vps50	-0.0727208	0.996652	-0.383537	0.273755	-1.14401	0.674049	NO
mmu-miR-151-3p	ENSMUSG00000023964	Calcr	0.0593593	0.99841	0.150024	0.579751	-0.191302	0.306068	NO
mmu-miR-34b-3p	ENSMUSG00000029664	Tfpi2	-0.485641	0.996652	-0.236776	0.643843	-2.05237	0.19094	NO
mmu-miR-532-5p	ENSMUSG00000029663	Gngt1	NA	NA	-0.0375693	0.883907	-2.41669	0.0677441	NO
mmu-miR-673-5p	ENSMUSG00000032766	Gng11	0.169942	0.996652	-0.264954	0.536775	-0.680037	0.0343531	NO
mmu-miR-532-5p	ENSMUSG00000032766	Gng11	0.169942	0.996652	-0.0375693	0.883907	-2.41669	0.0677441	NO
mmu-miR-671-5p	ENSMUSG00000032757	Bet1	0.0287897	0.996652	-0.658749	0.352425	-1.92348	0.54595	NO
mmu-miR-337-5p	ENSMUSG00000029661	Col1a2	-0.0442535	0.996652	-0.0408363	0.833174	-1.33065	0.709559	NO
mmu-miR-139-3p	ENSMUSG00000015189	Casd1	-0.043062	0.996652	-0.176213	0.806923	-0.797117	0.298897	NO
mmu-miR-151-3p	ENSMUSG00000032827	Ppp1r9a	-0.096915	0.996652	0.150024	0.579751	-0.191302	0.306068	NO
mmu-miR-369-3p	ENSMUSG00000002588	Pon1	1.31117	0.996652	0.217237	0.643052	0.479301	0.884751	NO
mmu-miR-151-3p	ENSMUSG00000042541	Sem1	-0.0302221	0.996652	0.150024	0.579751	-0.191302	0.306068	NO
mmu-miR-423-3p	ENSMUSG00000029754	Dlx6	0.0952869	0.996652	-0.606918	0.275113	-0.977902	0.338619	NO
mmu-miR-338-3p	ENSMUSG00000029755	Dlx5	0.0185589	0.996652	0.807797	0.0377321	0.545226	0.240263	NO
mmu-miR-409-5p	ENSMUSG00000061762	Tac1	-0.400161	0.722984	1.24524	0.0614095	-1.5346	0.619529	NO
mmu-miR-673-5p	ENSMUSG00000042460	C1galt1	-0.0518715	0.996652	-0.264954	0.536775	-0.680037	0.0343531	NO
mmu-miR-501-3p	ENSMUSG00000042447	Mios	-0.153018	0.882873	0.31491	0.302354	0.783282	0.221205	NO
mmu-miR-139-3p	ENSMUSG00000062995	Ica1	-0.0625405	0.996652	-0.176213	0.806923	-0.797117	0.298897	NO
mmu-miR-337-5p	ENSMUSG00000062995	Ica1	-0.0625405	0.996652	-0.0408363	0.833174	-1.33065	0.709559	NO
mmu-miR-671-5p	ENSMUSG00000062995	Ica1	-0.0625405	0.996652	-0.658749	0.352425	-1.92348	0.54595	NO
mmu-miR-369-3p	ENSMUSG00000046178	Nxph1	-0.072677	0.996652	0.217237	0.643052	0.479301	0.884751	NO
mmu-miR-139-3p	ENSMUSG00000029632	Ndufa4	-0.0553249	0.996652	-0.176213	0.806923	-0.797117	0.298897	NO
mmu-miR-342-3p	ENSMUSG00000029571	Tmem106b	-0.0663417	0.996652	-0.153595	0.696257	-1.76212	0.42733	NO
mmu-miR-369-3p	ENSMUSG00000048216	Gpr85	-0.0633314	0.996652	0.217237	0.643052	0.479301	0.884751	NO
mmu-miR-666-3p	ENSMUSG00000048216	Gpr85	-0.0633314	0.996652	-0.157681	0.726433	-3.3675	0.194747	NO
mmu-miR-501-3p	ENSMUSG00000029563	Foxp2	-0.345955	0.948563	0.31491	0.302354	0.783282	0.221205	NO
mmu-miR-139-5p	ENSMUSG00000041390	Mdfic	0.88517	0.930469	-0.0705343	0.816628	-0.955541	0.548138	NO
mmu-miR-501-3p	ENSMUSG00000000058	Cav2	-0.168094	0.814992	0.31491	0.302354	0.783282	0.221205	NO
mmu-miR-369-3p	ENSMUSG00000015733	Capza2	-0.0986079	0.996652	0.217237	0.643052	0.479301	0.884751	NO
mmu-miR-369-5p	ENSMUSG00000015733	Capza2	-0.0986079	0.996652	-0.0348029	0.908875	-0.633128	0.521823	NO
mmu-miR-151-5p	ENSMUSG00000029534	St7	0.0802681	0.996652	-0.0473167	0.801413	0.0282668	0.900961	NO
mmu-miR-532-5p	ENSMUSG00000010797	Wnt2	-0.168123	0.996652	-0.0375693	0.883907	-2.41669	0.0677441	NO
mmu-miR-331-3p	ENSMUSG00000010797	Wnt2	-0.168123	0.996652	-2.04862	0.000874315	-1.512	0.0611883	NO
mmu-miR-671-3p	ENSMUSG00000010797	Wnt2	-0.168123	0.996652	-0.383537	0.273755	-1.14401	0.674049	NO
mmu-miR-671-5p	ENSMUSG00000010796	Asz1	1.89834	0.996652	-0.658749	0.352425	-1.92348	0.54595	NO
mmu-miR-574-3p	ENSMUSG00000044155	Lsm8	0.0597563	0.996652	-1.00306	0.0201434	3.42572	0.263154	NO
mmu-miR-423-3p	ENSMUSG00000060882	Kcnd2	-0.0595727	0.996652	-0.606918	0.275113	-0.977902	0.338619	NO
mmu-miR-369-5p	ENSMUSG00000029669	Tspan12	-0.0741254	0.996652	-0.0348029	0.908875	-0.633128	0.521823	NO
mmu-miR-423-3p	ENSMUSG00000029672	Fam3c	-0.14047	0.948563	-0.606918	0.275113	-0.977902	0.338619	NO
mmu-miR-409-5p	ENSMUSG00000029672	Fam3c	-0.14047	0.948563	1.24524	0.0614095	-1.5346	0.619529	NO
mmu-miR-671-3p	ENSMUSG00000029672	Fam3c	-0.14047	0.948563	-0.383537	0.273755	-1.14401	0.674049	NO
mmu-miR-342-3p	ENSMUSG00000068748	Ptprz1	0.00450469	0.998318	-0.153595	0.696257	-1.76212	0.42733	NO
mmu-miR-342-3p	ENSMUSG00000107032	Gm5301	1.23613	0.996652	-0.153595	0.696257	-1.76212	0.42733	NO
mmu-miR-342-3p	ENSMUSG00000106989	Gm5989	2.1998	0.996652	-0.153595	0.696257	-1.76212	0.42733	NO
mmu-miR-337-5p	ENSMUSG00000029697	Fezf1	0.603887	0.996652	-0.0408363	0.833174	-1.33065	0.709559	NO
mmu-miR-369-3p	ENSMUSG00000029697	Fezf1	0.603887	0.996652	0.217237	0.643052	0.479301	0.884751	NO
mmu-miR-151-5p	ENSMUSG00000017978	Cadps2	-0.0333196	0.996652	-0.0473167	0.801413	0.0282668	0.900961	NO
mmu-miR-369-3p	ENSMUSG00000051956	Rnf133	0.929378	0.828016	0.217237	0.643052	0.479301	0.884751	NO
mmu-miR-34b-3p	ENSMUSG00000029683	Lmod2	2.62406	0.996652	-0.236776	0.643843	-2.05237	0.19094	NO
mmu-miR-423-3p	ENSMUSG00000029683	Lmod2	2.62406	0.996652	-0.606918	0.275113	-0.977902	0.338619	NO
mmu-miR-501-3p	ENSMUSG00000029683	Lmod2	2.62406	0.996652	0.31491	0.302354	0.783282	0.221205	NO
mmu-miR-331-3p	ENSMUSG00000029684	Wasl	-0.126527	0.89287	-2.04862	0.000874315	-1.512	0.0611883	NO
mmu-miR-188-5p	ENSMUSG00000029680	Hyal4	NA	NA	-2.20972	0.318876	-1.16385	0.646532	NO
mmu-miR-369-3p	ENSMUSG00000029682	Spam1	2.32635	0.996652	0.217237	0.643052	0.479301	0.884751	NO
mmu-miR-532-5p	ENSMUSG00000039904	Gpr37	-0.0216349	0.996652	-0.0375693	0.883907	-2.41669	0.0677441	NO
mmu-miR-369-3p	ENSMUSG00000039904	Gpr37	-0.0216349	0.996652	0.217237	0.643052	0.479301	0.884751	NO
mmu-miR-337-5p	ENSMUSG00000020440	Arf5	-0.107846	0.996652	-0.0408363	0.833174	-1.33065	0.709559	NO
mmu-miR-331-3p	ENSMUSG00000020440	Arf5	-0.107846	0.996652	-2.04862	0.000874315	-1.512	0.0611883	NO
mmu-miR-671-5p	ENSMUSG00000020440	Arf5	-0.107846	0.996652	-0.658749	0.352425	-1.92348	0.54595	NO
mmu-miR-151-5p	ENSMUSG00000020440	Arf5	-0.107846	0.996652	-0.0473167	0.801413	0.0282668	0.900961	NO
mmu-miR-139-3p	ENSMUSG00000049939	Lrrc4	-0.069715	0.996652	-0.176213	0.806923	-0.797117	0.298897	NO
mmu-miR-532-5p	ENSMUSG00000049939	Lrrc4	-0.069715	0.996652	-0.0375693	0.883907	-2.41669	0.0677441	NO
mmu-miR-139-5p	ENSMUSG00000029701	Rbm28	0.0533283	0.996652	-0.0705343	0.816628	-0.955541	0.548138	NO
mmu-miR-139-5p	ENSMUSG00000003500	Impdh1	-0.118878	0.996652	-0.0705343	0.816628	-0.955541	0.548138	NO
mmu-miR-331-3p	ENSMUSG00000003500	Impdh1	-0.118878	0.996652	-2.04862	0.000874315	-1.512	0.0611883	NO
mmu-miR-671-5p	ENSMUSG00000003500	Impdh1	-0.118878	0.996652	-0.658749	0.352425	-1.92348	0.54595	NO
mmu-miR-666-3p	ENSMUSG00000003500	Impdh1	-0.118878	0.996652	-0.157681	0.726433	-3.3675	0.194747	NO
mmu-miR-673-5p	ENSMUSG00000043421	Hilpda	-0.115741	0.996652	-0.264954	0.536775	-0.680037	0.0343531	NO
mmu-miR-409-5p	ENSMUSG00000039742	Garin1b	NA	NA	1.24524	0.0614095	-1.5346	0.619529	NO
mmu-miR-369-5p	ENSMUSG00000039742	Garin1b	NA	NA	-0.0348029	0.908875	-0.633128	0.521823	NO
mmu-miR-34b-3p	ENSMUSG00000029767	Calu	-0.0305055	0.996652	-0.236776	0.643843	-2.05237	0.19094	NO
mmu-miR-574-3p	ENSMUSG00000058831	Opn1sw	-0.0444304	0.99841	-1.00306	0.0201434	3.42572	0.263154	NO
mmu-miR-139-3p	ENSMUSG00000058831	Opn1sw	-0.0444304	0.99841	-0.176213	0.806923	-0.797117	0.298897	NO
mmu-miR-673-5p	ENSMUSG00000058831	Opn1sw	-0.0444304	0.99841	-0.264954	0.536775	-0.680037	0.0343531	NO
mmu-miR-423-5p	ENSMUSG00000068699	Flnc	-0.058469	0.996652	0.208863	0.685655	-1.52058	0.609909	NO
mmu-miR-342-3p	ENSMUSG00000068699	Flnc	-0.058469	0.996652	-0.153595	0.696257	-1.76212	0.42733	NO
mmu-miR-296-5p	ENSMUSG00000068699	Flnc	-0.058469	0.996652	-1.3928	0.000171955	-3.00266	0.0124473	NO
mmu-miR-423-5p	ENSMUSG00000004285	Atp6v1f	-0.124018	0.996652	0.208863	0.685655	-1.52058	0.609909	NO
mmu-miR-337-5p	ENSMUSG00000004285	Atp6v1f	-0.124018	0.996652	-0.0408363	0.833174	-1.33065	0.709559	NO
mmu-miR-369-5p	ENSMUSG00000004285	Atp6v1f	-0.124018	0.996652	-0.0348029	0.908875	-0.633128	0.521823	NO
mmu-miR-342-3p	ENSMUSG00000059022	Kcp	0.295178	0.996652	-0.153595	0.696257	-1.76212	0.42733	NO
mmu-miR-574-3p	ENSMUSG00000059022	Kcp	0.295178	0.996652	-1.00306	0.0201434	3.42572	0.263154	NO
mmu-miR-338-3p	ENSMUSG00000029771	Irf5	0.186139	0.996652	0.807797	0.0377321	0.545226	0.240263	NO
mmu-miR-296-5p	ENSMUSG00000029771	Irf5	0.186139	0.996652	-1.3928	0.000171955	-3.00266	0.0124473	NO
mmu-miR-409-5p	ENSMUSG00000001761	Smo	0.0935778	0.996652	1.24524	0.0614095	-1.5346	0.619529	NO
mmu-miR-409-5p	ENSMUSG00000058440	Nrf1	0.0858942	0.996652	1.24524	0.0614095	-1.5346	0.619529	NO
mmu-miR-337-5p	ENSMUSG00000039130	Zc3hc1	-0.159369	0.996652	-0.0408363	0.833174	-1.33065	0.709559	NO
mmu-miR-188-5p	ENSMUSG00000039130	Zc3hc1	-0.159369	0.996652	-2.20972	0.318876	-1.16385	0.646532	NO
mmu-miR-342-3p	ENSMUSG00000039130	Zc3hc1	-0.159369	0.996652	-0.153595	0.696257	-1.76212	0.42733	NO
mmu-miR-574-3p	ENSMUSG00000039130	Zc3hc1	-0.159369	0.996652	-1.00306	0.0201434	3.42572	0.263154	NO
mmu-miR-423-3p	ENSMUSG00000029782	Tmem209	-0.00519575	0.99841	-0.606918	0.275113	-0.977902	0.338619	NO
mmu-miR-423-5p	ENSMUSG00000029782	Tmem209	-0.00519575	0.99841	0.208863	0.685655	-1.52058	0.609909	NO
mmu-miR-151-5p	ENSMUSG00000029784	Ssmem1	0.747641	0.996652	-0.0473167	0.801413	0.0282668	0.900961	NO
mmu-miR-369-3p	ENSMUSG00000039070	Cpa4	-0.700248	0.996652	0.217237	0.643052	0.479301	0.884751	NO
mmu-miR-369-5p	ENSMUSG00000039070	Cpa4	-0.700248	0.996652	-0.0348029	0.908875	-0.633128	0.521823	NO
mmu-miR-671-3p	ENSMUSG00000039070	Cpa4	-0.700248	0.996652	-0.383537	0.273755	-1.14401	0.674049	NO
mmu-miR-337-5p	ENSMUSG00000029788	Cpa5	0.200926	0.996652	-0.0408363	0.833174	-1.33065	0.709559	NO
mmu-miR-369-3p	ENSMUSG00000029790	Cep41	0.103175	0.996652	0.217237	0.643052	0.479301	0.884751	NO
mmu-miR-574-3p	ENSMUSG00000025607	Copg2	-0.0855251	0.996652	-1.00306	0.0201434	3.42572	0.263154	NO
mmu-miR-338-3p	ENSMUSG00000025607	Copg2	-0.0855251	0.996652	0.807797	0.0377321	0.545226	0.240263	NO
mmu-miR-296-5p	ENSMUSG00000039032	Tsga13	0.223563	0.996652	-1.3928	0.000171955	-3.00266	0.0124473	NO
mmu-miR-423-3p	ENSMUSG00000073209	Klf14	-0.406984	0.996652	-0.606918	0.275113	-0.977902	0.338619	NO
mmu-miR-338-3p	ENSMUSG00000073209	Klf14	-0.406984	0.996652	0.807797	0.0377321	0.545226	0.240263	NO
mmu-miR-671-5p	ENSMUSG00000029766	1700012A03Rik	-1.63466	0.996652	-0.658749	0.352425	-1.92348	0.54595	NO
mmu-miR-139-5p	ENSMUSG00000029763	Exoc4	0.0704087	0.996652	-0.0705343	0.816628	-0.955541	0.548138	NO
[truncated: 13,463 more rows]

## Sheet: Pearson correlation
monaA-tailed isomiRs expression correlation with target mRNA expression under Tent2 KO in mice hippocampus
Table 3. Results of Pearson correlation analysis of monaA-tailed isomiR and targeted mRNA expression levels.
MIRNA	Gene Name	Pearson's correlation coefficient
mmu-miR-369-3p	Fap	-0.823
mmu-miR-671-3p	Eno1b	-0.813
mmu-miR-671-3p	Stra6	-0.798
mmu-miR-671-5p	Stra6	-0.756
mmu-miR-369-3p	Sgms2	-0.749
mmu-miR-296-5p	Tent5c	-0.717
mmu-miR-423-3p	Stra6	-0.714
mmu-miR-34b-3p	Stra6	-0.71
mmu-miR-532-5p	Sgms2	-0.684
mmu-miR-671-5p	Sgms2	-0.613
mmu-miR-666-3p	Sgms2	-0.596
mmu-miR-338-3p	Lamc2	-0.53
mmu-miR-338-3p	Olfm2	-0.529
mmu-miR-673-5p	Lmx1a	-0.522
mmu-miR-671-3p	Pla2g5	-0.519
mmu-miR-338-3p	Zdhhc22	-0.48
mmu-miR-501-3p	Pon3	-0.338
mmu-miR-338-3p	Nxph3	-0.293
mmu-miR-369-5p	Nid2	-0.292
mmu-miR-338-3p	Camk2d	-0.251
mmu-miR-151-5p	Fbxo2	-0.103
mmu-miR-188-5p	Camk2d	-0.011
mmu-miR-188-5p	Ass1	0.047
mmu-miR-188-5p	Nxph3	0.082
mmu-miR-574-3p	Trim66	0.23
mmu-miR-188-5p	Dzank1	0.268
mmu-miR-188-5p	Cit	0.281
mmu-miR-331-3p	Rims3	0.372
mmu-miR-501-3p	Rims3	0.419
mmu-miR-342-3p	Cux2	0.425
mmu-miR-342-3p	Hivep1	0.435
mmu-miR-342-3p	Etl4	0.505
mmu-miR-666-3p	Ass1	0.516
mmu-miR-139-5p	Meis2	0.533
mmu-miR-673-5p	Trim66	0.599
mmu-miR-151-5p	Sgms2	0.637
mmu-miR-671-5p	Nxph3	0.651
mmu-miR-574-3p	Gpr88	0.657
mmu-miR-151-5p	Pon3	0.663
mmu-miR-671-5p	Ass1	0.677
mmu-miR-409-5p	Rims3	0.689
mmu-miR-369-5p	Bmp3	0.691
mmu-miR-673-5p	Plcl2	0.707
mmu-miR-296-5p	Plxdc1	0.711
mmu-miR-671-5p	Elmo1	0.73
mmu-miR-671-3p	Nxph3	0.734
mmu-miR-423-5p	Fbxo2	0.747
mmu-miR-369-5p	Chrna4	0.75
mmu-miR-151-3p	Unc13c	0.753
mmu-miR-342-3p	Camk2n1	0.778
mmu-miR-671-3p	Plxdc1	0.811
mmu-miR-671-3p	Efhd2	0.814
mmu-miR-139-5p	Lamc2	0.819
mmu-miR-532-5p	Fbxo2	0.825
mmu-miR-671-3p	Eno1	0.825
mmu-miR-337-5p	Fhod3	0.891
mmu-miR-139-5p	Fbxo2	0.917
mmu-miR-423-3p	Olfm2	0.932
mmu-miR-151-3p	Fbxo2	0.964
mmu-miR-337-5p	Gpr26	0.971
mmu-miR-532-5p	Dzank1	0.975

## Sheet: Gene Annotation
monaA-tailed isomiRs expression correlation with target mRNA expression under Tent2 KO in mice hippocampus
Table 3. Results of Pearson correlation analysis of monaA-tailed isomiR and targeted mRNA expression levels.
MIRNA	Ensembl Gene Id	Gene Name	CORRELATION	GOID	term	parent	parentTerm	cluster	score	size	termUniqueness	termUniquenessWithinCluster	termDispensability
mmu-miR-673-5p	ENSMUSG00000026686	Lmx1a	negative	GO:0007626	locomotory behavior	GO:0007611	learning or memory	1	1.32299	273	0.9038	0.617	0.766
mmu-miR-671-3p	ENSMUSG00000059040	Eno1b	negative	GO:1903297	regulation of hypoxia-induced intrinsic apoptotic signaling pathway	GO:1903297	regulation of hypoxia-induced intrinsic apoptotic signaling pathway	2	1.32299	10	0.9762	1	0
mmu-miR-574-3p	ENSMUSG00000031026	Trim66	negative	GO:0010369	NA	NA	NA	NA	NA	NA	NA	NA	NA
mmu-miR-338-3p	ENSMUSG00000026479	Lamc2	negative	GO:0007411	axon guidance	GO:0007411	axon guidance	3	1.32299	255	0.9488	1	0
mmu-miR-369-5p	ENSMUSG00000021806	Nid2	negative	GO:0007160	cell-matrix adhesion	GO:0007160	cell-matrix adhesion	4	1.01877	238	0.989	1	0
mmu-miR-338-3p	ENSMUSG00000032172	Olfm2	negative	GO:0007626	locomotory behavior	GO:0007611	learning or memory	1	1.32299	273	0.9038	0.617	0.766
mmu-miR-34b-3p	ENSMUSG00000032327	Stra6	negative	GO:0007611	learning or memory	GO:0007611	learning or memory	1	1.32299	335	0.903	0.617	0
mmu-miR-423-3p	ENSMUSG00000032327	Stra6	negative	GO:0007611	learning or memory	GO:0007611	learning or memory	1	1.32299	335	0.903	0.617	0
mmu-miR-671-3p	ENSMUSG00000032327	Stra6	negative	GO:0007611	learning or memory	GO:0007611	learning or memory	1	1.32299	335	0.903	0.617	0
mmu-miR-671-5p	ENSMUSG00000032327	Stra6	negative	GO:0007611	learning or memory	GO:0007611	learning or memory	1	1.32299	335	0.903	0.617	0
mmu-miR-296-5p	ENSMUSG00000044468	Tent5c	negative	GO:0048255	mRNA stabilization	GO:1901136	carbohydrate derivative catabolic process	5	1.22163	63	0.8565	0.727	0.546
mmu-miR-574-3p	ENSMUSG00000068696	Gpr88	negative	GO:0007626	locomotory behavior	GO:0007611	learning or memory	1	1.32299	273	0.9038	0.617	0.766
mmu-miR-338-3p	ENSMUSG00000053819	Camk2d	negative	GO:0042391	regulation of membrane potential	GO:0042391	regulation of membrane potential	6	1.32299	495	0.9437	1	0
mmu-miR-532-5p	ENSMUSG00000050931	Sgms2	negative	GO:0008654	phospholipid biosynthetic process	GO:0008654	phospholipid biosynthetic process	7	1.32299	220	0.9479	1	0
mmu-miR-671-5p	ENSMUSG00000050931	Sgms2	negative	GO:0008654	phospholipid biosynthetic process	GO:0008654	phospholipid biosynthetic process	7	1.32299	220	0.9479	1	0
mmu-miR-666-3p	ENSMUSG00000050931	Sgms2	negative	GO:0008654	phospholipid biosynthetic process	GO:0008654	phospholipid biosynthetic process	7	1.32299	220	0.9479	1	0
mmu-miR-338-3p	ENSMUSG00000048483	Zdhhc22	negative	GO:0072659	protein localization to plasma membrane	GO:0072659	protein localization to plasma membrane	8	1.32299	317	0.9889	1	0
mmu-miR-338-3p	ENSMUSG00000046719	Nxph3	negative	NA	NA	NA	NA	NA	NA	NA	NA	NA	NA
mmu-miR-501-3p	ENSMUSG00000032890	Rims3	negative	GO:0042391	regulation of membrane potential	GO:0042391	regulation of membrane potential	6	1.32299	495	0.9437	1	0
mmu-miR-671-3p	ENSMUSG00000041193	Pla2g5	negative	GO:0008654	phospholipid biosynthetic process	GO:0008654	phospholipid biosynthetic process	7	1.32299	220	0.9479	1	0
mmu-miR-151-5p	ENSMUSG00000041556	Fbxo2	negative	GO:1901136	carbohydrate derivative catabolic process	GO:1901136	carbohydrate derivative catabolic process	5	1.32299	268	0.9272	0.727	0
mmu-miR-337-5p	ENSMUSG00000034295	Fhod3	positive	GO:0055013	cardiac muscle cell development	GO:0042692	muscle cell differentiation	1	1.02007	111	0.844211	0.5885	0.853
mmu-miR-501-3p	ENSMUSG00000029759	Pon3	positive	GO:0009636	response to toxic substance	GO:0009636	response to toxic substance	2	1.02007	138	0.962737	1	0
mmu-miR-151-5p	ENSMUSG00000029759	Pon3	positive	GO:0009636	response to toxic substance	GO:0009636	response to toxic substance	2	1.02007	138	0.962737	1	0
mmu-miR-673-5p	ENSMUSG00000031026	Trim66	positive	NA	NA	NA	NA	NA	NA	NA	NA	NA	NA
mmu-miR-337-5p	ENSMUSG00000040125	Gpr26	positive	GO:0007189	adenylate cyclase-activating G protein-coupled receptor signaling pathway	GO:0048791	calcium ion-regulated exocytosis of neurotransmitter	3	0.832791	160	0.908789	0.7825	0.256
mmu-miR-369-5p	ENSMUSG00000029335	Bmp3	positive	GO:0001503	ossification	GO:0050890	cognition	4	0.935664	487	0.937579	0.8915	0.217
mmu-miR-188-5p	ENSMUSG00000029516	Cit	positive	GO:0048814	regulation of dendrite morphogenesis	GO:0042692	muscle cell differentiation	1	1.02007	99	0.802	0.6025	0.379
mmu-miR-342-3p	ENSMUSG00000042589	Cux2	positive	GO:0050890	cognition	GO:0050890	cognition	4	1.15697	376	0.938895	0.8915	0
mmu-miR-139-5p	ENSMUSG00000026479	Lamc2	positive	GO:0007411	axon guidance	GO:0042692	muscle cell differentiation	1	0.753635	255	0.823316	0.572833	0.425
mmu-miR-671-5p	ENSMUSG00000041112	Elmo1	positive	GO:0016601	Rac protein signal transduction	GO:0048791	calcium ion-regulated exocytosis of neurotransmitter	3	1.02007	59	0.915316	0.79475	0.236
mmu-miR-342-3p	ENSMUSG00000021366	Hivep1	positive	GO:0030509	BMP signaling pathway	GO:0048791	calcium ion-regulated exocytosis of neurotransmitter	3	0.823611	169	0.907947	0.781	0.259
mmu-miR-423-3p	ENSMUSG00000032172	Olfm2	positive	GO:0042692	muscle cell differentiation	GO:0042692	muscle cell differentiation	1	1.02007	476	0.873368	0.620833	0
mmu-miR-151-3p	ENSMUSG00000062151	Unc13c	positive	GO:0048791	calcium ion-regulated exocytosis of neurotransmitter	GO:0048791	calcium ion-regulated exocytosis of neurotransmitter	3	1.15697	25	0.939263	0.81225	0
mmu-miR-188-5p	ENSMUSG00000053819	Camk2d	positive	GO:0042391	regulation of membrane potential	GO:0042391	regulation of membrane potential	5	1.02007	495	0.967053	1	0
mmu-miR-369-3p	ENSMUSG00000050931	Sgms2	positive	GO:0006686	sphingomyelin biosynthetic process	GO:0006686	sphingomyelin biosynthetic process	6	1.02007	12	0.982842	1	0
mmu-miR-151-5p	ENSMUSG00000050931	Sgms2	positive	GO:0006686	sphingomyelin biosynthetic process	GO:0006686	sphingomyelin biosynthetic process	6	1.02007	12	0.982842	1	0
mmu-miR-673-5p	ENSMUSG00000038910	Plcl2	positive	GO:0051099	positive regulation of binding	GO:0051099	positive regulation of binding	7	1.02007	157	0.970474	1	0
mmu-miR-188-5p	ENSMUSG00000046719	Nxph3	positive	NA	NA	NA	NA	NA	NA	NA	NA	NA	NA
mmu-miR-671-3p	ENSMUSG00000046719	Nxph3	positive	NA	NA	NA	NA	NA	NA	NA	NA	NA	NA
mmu-miR-671-5p	ENSMUSG00000046719	Nxph3	positive	NA	NA	NA	NA	NA	NA	NA	NA	NA	NA
mmu-miR-671-3p	ENSMUSG00000017417	Plxdc1	positive	NA	NA	NA	NA	NA	NA	NA	NA	NA	NA
mmu-miR-296-5p	ENSMUSG00000017417	Plxdc1	positive	NA	NA	NA	NA	NA	NA	NA	NA	NA	NA
mmu-miR-409-5p	ENSMUSG00000032890	Rims3	positive	GO:0048791	calcium ion-regulated exocytosis of neurotransmitter	GO:0048791	calcium ion-regulated exocytosis of neurotransmitter	3	1.15697	25	0.939263	0.81225	0
mmu-miR-331-3p	ENSMUSG00000032890	Rims3	positive	GO:0048791	calcium ion-regulated exocytosis of neurotransmitter	GO:0048791	calcium ion-regulated exocytosis of neurotransmitter	3	1.15697	25	0.939263	0.81225	0
mmu-miR-342-3p	ENSMUSG00000046447	Camk2n1	positive	GO:0050890	cognition	GO:0050890	cognition	4	1.15697	376	0.938895	0.8915	0
mmu-miR-671-3p	ENSMUSG00000040659	Efhd2	positive	NA	NA	NA	NA	NA	NA	NA	NA	NA	NA
mmu-miR-423-5p	ENSMUSG00000041556	Fbxo2	positive	GO:1901136	carbohydrate derivative catabolic process	GO:1901136	carbohydrate derivative catabolic process	8	1.02007	268	0.992316	1	0
mmu-miR-139-5p	ENSMUSG00000041556	Fbxo2	positive	GO:1901136	carbohydrate derivative catabolic process	GO:1901136	carbohydrate derivative catabolic process	8	1.02007	268	0.992316	1	0
mmu-miR-532-5p	ENSMUSG00000041556	Fbxo2	positive	GO:1901136	carbohydrate derivative catabolic process	GO:1901136	carbohydrate derivative catabolic process	8	1.02007	268	0.992316	1	0
mmu-miR-151-3p	ENSMUSG00000041556	Fbxo2	positive	GO:1901136	carbohydrate derivative catabolic process	GO:1901136	carbohydrate derivative catabolic process	8	1.02007	268	0.992316	1	0
mmu-miR-671-3p	ENSMUSG00000063524	Eno1	positive	GO:0001666	response to hypoxia	GO:0001666	response to hypoxia	9	1.02007	232	0.961684	1	0
mmu-miR-342-3p	ENSMUSG00000036617	Etl4	positive	GO:0048706	embryonic skeletal system development	GO:0042692	muscle cell differentiation	1	0.851128	148	0.898842	0.745167	0.26
mmu-miR-188-5p	ENSMUSG00000076441	Ass1	positive	GO:0009636	response to toxic substance	GO:0009636	response to toxic substance	2	1.02007	138	0.962737	1	0
mmu-miR-671-5p	ENSMUSG00000076441	Ass1	positive	GO:0009636	response to toxic substance	GO:0009636	response to toxic substance	2	1.02007	138	0.962737	1	0
mmu-miR-666-3p	ENSMUSG00000076441	Ass1	positive	GO:0009636	response to toxic substance	GO:0009636	response to toxic substance	2	1.02007	138	0.962737	1	0
mmu-miR-369-3p	ENSMUSG00000000392	Fap	positive	GO:1903054	negative regulation of extracellular matrix organization	GO:1903054	negative regulation of extracellular matrix organization	10	1.02007	12	0.934474	1	0
mmu-miR-139-5p	ENSMUSG00000027210	Meis2	positive	GO:0050890	cognition	GO:0050890	cognition	4	1.15697	376	0.938895	0.8915	0
mmu-miR-188-5p	ENSMUSG00000037259	Dzank1	positive	GO:0042462	eye photoreceptor cell development	GO:0042692	muscle cell differentiation	1	0.969086	48	0.861105	0.637167	0.358
mmu-miR-532-5p	ENSMUSG00000037259	Dzank1	positive	GO:0042462	eye photoreceptor cell development	GO:0042692	muscle cell differentiation	1	0.969086	48	0.861105	0.637167	0.358
mmu-miR-369-5p	ENSMUSG00000027577	Chrna4	positive	GO:0050890	cognition	GO:0050890	cognition	4	1.15697	376	0.938895	0.8915	0
